# Supplementary material for: Plasma growth hormone pulses induce male-biased pulsatile chromatin opening and epigenetic regulation in adult mouse liver
Source: eLife. 2023 Dec 13;12:RP91367. doi: 10.7554/eLife.91367 (PMC10721219; doi:10.7554/eLife.91367)
Supplement: Supplementary file 1. — (A) Standard reference set of 70,211 liver DHS regions and associated datasets. (B) Enrichments of sex-biased DHS for corresponding sex-biased vs. sex-opposite gene targets (sections 1–3) and enrichments for hypox-responsive class I and II sex-biased genes (section 4). (C) Summary of sex-biased gene targets of sex-biased DHS, from sheet A. Columns A and B indicate that multiple sex-biased DHS map to many sex-biased genes. The overall set of sex-biased DHS mapped to a total of 192 male-biased genes and 174 female-biased genes, corresponding to 32.5% of all sex-biased genes considered. (D) Calculation of chromatin state distributions shown in Figure 1D, based on data in sheet A, columns AN–AQ. (E) DHS closing and opening following continuous GH infusion in male mice for 7 d, based on data in sheet A, column BC. [file elife-91367-supp1.xlsx]

## Sheet: 1A_70,211 Reference set DHS
Supplementary File 1A. Standard Reference Set of 70,211 liver DHS regions and associated datasets. See sheet 1A_Legend for details.
DHS regions (n=70,211)							Characterization of DHS as static or dynamic based on overlap with DHS that open due to endogenous pulses of GH/STAT5 in pituitary-intact male mouse liver. DHS counts (column I): 834 male_bias_dynamic, 1895 male_bias_static, 7 female-bias_dynamic, 1359 female_bias_static, 1532 sex_indep_dynamic, 64,584 sex_indep_static.		Characterization of DHS based the presence of STAT5 binding (determined by ChIP-seq)					The number of STAT5 motif occurrences detected in the DHS sequence. Those DHS that lack the STAT5 motif have a frequency of zero.	Characterization of DHS based on the five class DHS model: weak enhancer, enhancer, insulator or promoter regions (Matthews and Waxman, 2018)				Putative gene target of DHS (=Nearest gene within the same TAD to each DHS)												Sex bias and class of the putative gene target			DHS response to hypophysectomy (Hx) in either male (column AI) or female (column AJ) liver. DHS response can be static (no change relative to control), dDHS_open, or dDHS_close. DHS labeled as "none" indcate that DHS lacks overlap with the peak union DHS list from the corresponding dataset. Note: 93% of the DHS that OPEN following hypophysectomy are static sex-independent DHS [1596 of 1709 (93%) …		DHS response to a single injection of GH in hypophysectomized male mouse liver. Hypox male mice were given a single dose of GH and euthanized either 30, 90, or 240 minutes later. The DHS response to GH treatment at each time point was compared to MHx as shown. DHS response can be static (no change relative to control), dDHS_open, or dDHS_close. DHS labeled as "none" indcate that DHS lacks overlap…			Characterization of DHS based on the chromatin states defined for male mouse liver (Sugathan and Waxman, 2013). Each DHS was assigned to one of the 14 chromatin states based on genomic overlap. The full and abbreviated name of the chromatin state are shown. Also see Table S2D.		Characterization of DHS based on the chromatin states defined for female mouse liver (Sugathan and Waxman, 2013). Each DHS was assigned to one of the 14 chromatin states based on genomic overlap. The full and abbreviated name of the chromatin state are shown. Also see Table S2D.		Chromatin state at DHS: comparison between male and female liver	A summary of the DHS response to hypophysectomy and a single injection of GH in hypox male mouse liver. A four-digit total flag sum (TFS) number was generated for each DHS (see Methods). Digits 1-4 summarize the following experiments respectively: (1) MHx vs Male Control, (2) MHx + GH 30 min vs MHx, (3) MHx + GH 90 min vs MHx, and (4) MHx + GH 240 min vs MHx. TFS values are shown for the subset o…	RiPPM Normalized DNase-seq read counts in the DHS
									Flag to indicate whether STAT5 is bound or not bound in the DHS	For DHS that contain a STAT5 binding site; the sex specificity (male, female enriched, or common) of the binding site is indicated	For DHS that contain a STAT5 binding site; the normalized STAT5 ChIP-seq read count is shown for the male-high (MH), female-high (FH), and the average of the two data sets.				Class designation for the DHS used in this study	Shown are the abbreviations and full names for the class assignment as follows: weak enhancer (WE), enhancer (Enh), insulator (Insul), weak promoter (WP), and promoter (Prom).		Simplification of the DHS class assignment. The labels "enhancer" and "promoter" is comprised of those identified as standard and weak for the respective class assignment.	Target gene of the DHS							Gene expression data for the putative target gene. RNA-seq was used to compare gene expression signal between intact male (Intensity 2) and intact female (Intensity 1) liver samples. The SEGEX database was used to obtain gene expression data for RefSeq (experiment 416) and lncRNA (experiment 547) genes. Shown is the ratio (Intensity 2/Intensity 1), fold-change (FC), and Pvalue for differential ge…					Shown is the sex bias of the putative gene target. Sex-specific genes (labeled "Male" or "Female") were defined by |FC| > 1.5 (RefSeq) or |FC| > 2.0 (lncRNA), p-value < 0.05, and FPKM > 0.25 cutoff for the sex with greater signal intensity. Sex-independent genes (labeled "sex_indep") are defined by |FC| < 1.2, p-value > 0.1, and FPKM > 1 in both male and female liver. Genes labeled as "None" were…	Shown is the class (I or II) and subclass (IA, IB, IC, IIA, IIB) for the indicated putative gene target. The following SEGEX database RNA-seq experiments were used to identify RefSeq genes, for male (# 362) and female (# 363) liver; and lncRNA genes, for male (# 595) and female (# 599) liver. Only sex-specific genes have class and subclass designations while all other genes are labeled as "none".													DNase-seq read counts for the pituitary-intact male liver samples			DNase-seq read counts for the hypophysectomized (hypox) and hypox+GH treated male liver and female liver samples
Merged DHS site number	chr	start	end	DHS site length	Sex specificity	TAD ID	Overlap with DHS from intact male STAT5 high/low livers (based on Supplemental File 5B)	DHS Response to endogenous GH pulses. Sex bias is based on column F, static vs dynamic is based on column H, with STAT5_lo_DHS designated 'static' here. 'None' in column H is assigned 'static' in column I.	STAT5 TFBS Flag	Overlap STAT5 TFBS	STAT5 MH read counts	STAT5 FH read counts	Avg (MH and FH) read count	Freq TRANSFAC STAT5 motif	DHS.class.and.name	Abbreviated DHS Class name	Full DHS Class name	DHS Class	chrom TSS	chromStart TSS	chromEnd TSS	strand TSS	Gene Symbol	TAD TSS	Distance to TSS (bp)	Intensity 1	Intensity 2	Ratio	FC	Pvalue	Gene Sex Bias	Class Sex Bias	Subclass Sex Bias	MHx vs Male Control	FHx vs Female Control	MHx + GH 30min vs MHx	MHx + GH 90min vs MHx	MHx + GH 240min vs MHx	Male ChromState	Abbreviated Male ChromState	Female ChromState	Abbreviated Female ChromState	1= same; 0= different	TFS value	Male STAT5 Hi	Male STAT5 Lo	log2FC	Male Hypox	Female Control
1	chr1	3406266	3406483	218	sex-indep (robust)	TAD0_chr1begin	STAT5_sDHS	sex_indep_static (n=64,584)	not_bound	none	0	0	0	0	WE_1	WE	weak_enhancer	enhancer	chr1	3661577	3661579	-	xkr4	TAD0_chr1begin	255095	0.00240021	0.00243126	1.01999	1.01999	1	None	none	none	static	static	none	none	none	207518_E12	E12	213990_E5	E5	0	NA	122.382	97	0.34	145.719	265.305
2	chr1	3413183	3413552	370	sex-indep (robust)	TAD0_chr1begin	none	sex_indep_static (n=64,584)	not_bound	none	0	0	0	3	WE_2	WE	weak_enhancer	enhancer	chr1	3661577	3661579	-	xkr4	TAD0_chr1begin	248026	0.00240021	0.00243126	1.01999	1.01999	1	None	none	none	none	static	none	none	none	207521_E11	E11	213993_E5	E5	0	NA	76.881	66	0.22	37.779	123.04
3	chr1	3466751	3466926	176	sex-indep (standard)	TAD0_chr1begin	STAT5_sDHS	sex_indep_static (n=64,584)	not_bound	none	0	0	0	0	Enh_1	Enh	enhancer	enhancer	chr1	3661577	3661579	-	xkr4	TAD0_chr1begin	194652	0.00240021	0.00243126	1.01999	1.01999	1	None	none	none	none	none	none	none	none	207530_E9	E9	213999_E9	E9	1	NA	59.622	81	-0.44	21.588	99.97
4	chr1	3467754	3468166	413	sex-indep (robust)	TAD0_chr1begin	STAT5_sDHS	sex_indep_static (n=64,584)	STAT5_bound	common	150	111	130.5	0	Enh_2	Enh	enhancer	enhancer	chr1	3661577	3661579	-	xkr4	TAD0_chr1begin	193412	0.00240021	0.00243126	1.01999	1.01999	1	None	none	none	static	static	static	static	static	207531_E6	E6	214000_E6	E6	1	NA	348.318	340	0.03	291.438	595.975
5	chr1	3504628	3505602	975	sex-indep (robust)	TAD0_chr1begin	STAT5_sDHS	sex_indep_static (n=64,584)	STAT5_bound	common	488	383	435.5	4	Enh_3	Enh	enhancer	enhancer	chr1	3661577	3661579	-	xkr4	TAD0_chr1begin	155976	0.00240021	0.00243126	1.01999	1.01999	1	None	none	none	static	dDHS_close	static	static	static	207538_E6	E6	214009_E6	E6	1	NA	4918.81	2908	0.76	3254.39	6563.41
6	chr1	3576583	3576809	227	sex-indep (robust)	TAD0_chr1begin	STAT5_sDHS	sex_indep_static (n=64,584)	not_bound	none	0	0	0	0	WE_3	WE	weak_enhancer	enhancer	chr1	3661577	3661579	-	xkr4	TAD0_chr1begin	84769	0.00240021	0.00243126	1.01999	1.01999	1	None	none	none	static	static	none	none	none	207551_E11	E11	214022_E12	E12	0	NA	136.503	110	0.31	118.734	180.715
7	chr1	3595745	3596010	266	sex-indep (robust)	TAD0_chr1begin	STAT5_sDHS	sex_indep_static (n=64,584)	not_bound	none	0	0	0	0	WE_4	WE	weak_enhancer	enhancer	chr1	3661577	3661579	-	xkr4	TAD0_chr1begin	65568	0.00240021	0.00243126	1.01999	1.01999	1	None	none	none	static	static	static	static	static	207555_E6	E6	214026_E6	E6	1	NA	211.815	239	-0.17	269.85	353.74
8	chr1	4416880	4417251	372	sex-indep (robust)	TAD1_chr1	STAT5_sDHS	sex_indep_static (n=64,584)	not_bound	none	0	0	0	0	WE_5	WE	weak_enhancer	enhancer	chr1	4487433	4487435	-	sox17	TAD1_chr1	70183	0.362497	0.346457	0.997843	-1.00216	1	None	none	none	dDHS_open	static	static	static	static	207574_E12	E12	214063_E12	E12	1	NA	225.936	264	-0.22	555.891	553.68
9	chr1	4486450	4486776	327	sex-indep (standard)	TAD1_chr1	STAT5_sDHS	sex_indep_static (n=64,584)	not_bound	none	0	0	0	0	WE_6	WE	weak_enhancer	enhancer	chr1	4487433	4487435	-	sox17	TAD1_chr1	658	0.362497	0.346457	0.997843	-1.00216	1	None	none	none	none	none	none	none	none	207581_E12	E12	214071_E12	E12	1	NA	89.433	86	0.06	167.307	80.745
10	chr1	4487420	4487647	228	sex-indep (standard)	TAD1_chr1	none	sex_indep_static (n=64,584)	not_bound	none	0	0	0	0	WE_7	WE	weak_enhancer	enhancer	chr1	4487433	4487435	-	sox17	TAD1_chr1	0	0.362497	0.346457	0.997843	-1.00216	1	None	none	none	none	none	none	none	none	207581_E12	E12	214071_E12	E12	1	NA	32.949	35	-0.09	113.337	15.38
11	chr1	4504003	4504564	562	sex-indep (robust)	TAD1_chr1	STAT5_hi_dDHS	sex_indep_dynamic (n=1532)	STAT5_bound	common	198	163	180.5	2	WE_8	WE	weak_enhancer	enhancer	chr1	4487433	4487435	-	sox17	TAD1_chr1	16569	0.362497	0.346457	0.997843	-1.00216	1	None	none	none	dDHS_close	static	dDHS_open	dDHS_open	dDHS_open	207586_E6	E6	214076_E6	E6	1	1111	1043.38	465	1.17	377.79	995.855
12	chr1	4561654	4562157	504	sex-indep (robust)	TAD1_chr1	STAT5_sDHS	sex_indep_static (n=64,584)	not_bound	none	0	0	0	0	Enh_4	Enh	enhancer	enhancer	chr1	4487433	4487435	-	sox17	TAD1_chr1	74220	0.362497	0.346457	0.997843	-1.00216	1	None	none	none	static	static	none	none	static	207597_E7	E7	214087_E12	E12	0	NA	207.108	182	0.19	280.644	149.955
13	chr1	4607607	4607907	301	sex-indep (robust)	TAD1_chr1	STAT5_sDHS	sex_indep_static (n=64,584)	not_bound	none	0	0	0	2	WE_9	WE	weak_enhancer	enhancer	chr1	4487433	4487435	-	sox17	TAD1_chr1	120173	0.362497	0.346457	0.997843	-1.00216	1	None	none	none	static	static	none	static	static	207600_E11	E11	214091_E11	E11	1	NA	207.108	127	0.71	210.483	226.855
14	chr1	4644079	4644493	415	sex-indep (robust)	TAD1_chr1	STAT5_sDHS	sex_indep_static (n=64,584)	not_bound	none	0	0	0	0	WE_10	WE	weak_enhancer	enhancer	chr1	4775805	4775807	-	mrpl15	TAD1_chr1	131313	7.10053	5.47645	0.800187	-1.24971	0.00986921	None	none	none	static	none	none	none	static	207607_E6	E6	214098_E11	E11	0	NA	167.883	224	-0.42	205.086	138.42
15	chr1	4651774	4652240	467	Male (robust)	TAD1_chr1	STAT5_sDHS	male_bias_static (n=1895)	STAT5_bound	male_enriched	317	11	164	0	WE_11	WE	weak_enhancer	enhancer	chr1	4775805	4775807	-	mrpl15	TAD1_chr1	123566	7.10053	5.47645	0.800187	-1.24971	0.00986921	None	none	none	static	dDHS_open	dDHS_open	static	dDHS_open	207615_E6	E6	214100_E11	E11	0	NA	1168.9	722	0.7	793.359	419.105
16	chr1	4660743	4661047	305	Male (standard)	TAD1_chr1	STAT5_hi_dDHS	male_bias_dynamic (n=834)	STAT5_bound	common	720	297	508.5	4	Enh_5	Enh	enhancer	enhancer	chr1	4775805	4775807	-	mrpl15	TAD1_chr1	114759	7.10053	5.47645	0.800187	-1.24971	0.00986921	None	none	none	static	none	none	none	none	207622_E6	E6	214102_E11	E11	0	0	362.439	161	1.17	232.071	246.08
17	chr1	4661316	4662219	904	sex-indep (robust)	TAD1_chr1	none	sex_indep_static (n=64,584)	STAT5_bound	common	720	297	508.5	1	Enh_6	Enh	enhancer	enhancer	chr1	4775805	4775807	-	mrpl15	TAD1_chr1	113587	7.10053	5.47645	0.800187	-1.24971	0.00986921	None	none	none	static	static	dDHS_open	dDHS_open	dDHS_open	207624_E6	E6	214104_E6	E6	1	NA	2366.05	1561	0.6	1770.22	2376.21
18	chr1	4736913	4737219	307	sex-indep (robust)	TAD1_chr1	STAT5_sDHS	sex_indep_static (n=64,584)	not_bound	none	0	0	0	2	WE_12	WE	weak_enhancer	enhancer	chr1	4775805	4775807	-	mrpl15	TAD1_chr1	38587	7.10053	5.47645	0.800187	-1.24971	0.00986921	None	none	none	static	static	static	none	none	207632_E5	E5	214111_E2	E2	0	NA	149.055	117	0.35	188.895	153.8
19	chr1	4758414	4759705	1292	sex-indep (robust)	TAD1_chr1	STAT5_sDHS	sex_indep_static (n=64,584)	STAT5_bound	female_enriched	1293	3047	2170	8	Insul_1	Insul	insulator	insulator	chr1	4775805	4775807	-	mrpl15	TAD1_chr1	16101	7.10053	5.47645	0.800187	-1.24971	0.00986921	None	none	none	static	static	dDHS_open	dDHS_open	dDHS_open	207637_E6	E6	214117_E6	E6	1	NA	3138	2276	0.46	2061.65	3875.76
20	chr1	4759881	4760772	892	sex-indep (robust)	TAD1_chr1	STAT5_sDHS	sex_indep_static (n=64,584)	not_bound	none	0	0	0	0	Insul_2	Insul	insulator	insulator	chr1	4775805	4775807	-	mrpl15	TAD1_chr1	15034	7.10053	5.47645	0.800187	-1.24971	0.00986921	None	none	none	none	none	none	none	none	207639_E6	E6	214121_E6	E6	1	NA	417.354	448	-0.1	480.333	707.48
21	chr1	4761108	4761295	188	sex-indep (standard)	TAD1_chr1	none	sex_indep_static (n=64,584)	not_bound	none	0	0	0	0	Insul_3	Insul	insulator	insulator	chr1	4775805	4775807	-	mrpl15	TAD1_chr1	14511	7.10053	5.47645	0.800187	-1.24971	0.00986921	None	none	none	none	none	none	none	none	207642_E14	E14	214123_E13	E13	0	NA	17.259	16	0.11	16.191	46.14
22	chr1	4774222	4774754	533	sex-indep (robust)	TAD1_chr1	STAT5_sDHS	sex_indep_static (n=64,584)	STAT5_bound	common	157	120	138.5	1	Prom_1	Prom	promoter	promoter	chr1	4775805	4775807	-	mrpl15	TAD1_chr1	1052	7.10053	5.47645	0.800187	-1.24971	0.00986921	None	none	none	static	static	static	static	static	207646_E7	E7	214128_E6	E6	0	NA	505.218	489	0.05	674.625	868.97
23	chr1	4775405	4776273	869	sex-indep (robust)	TAD1_chr1	STAT5_sDHS	sex_indep_static (n=64,584)	not_bound	none	0	0	0	2	Prom_2	Prom	promoter	promoter	chr1	4775805	4775807	-	mrpl15	TAD1_chr1	0	7.10053	5.47645	0.800187	-1.24971	0.00986921	None	none	none	static	dDHS_open	static	static	static	207648_E7	E7	214131_E7	E7	1	NA	942.969	1150	-0.29	1295.28	826.675
24	chr1	4791594	4792418	825	sex-indep (robust)	TAD1_chr1	STAT5_sDHS	sex_indep_static (n=64,584)	STAT5_bound	male_enriched	431	123	277	0	Enh_7	Enh	enhancer	enhancer	chr1	4797973	4797975	+	lypla1	TAD1_chr1	5556	42.0587	36.7934	0.908401	-1.10084	0.707389	sex_indep	none	none	static	static	static	static	static	207659_E6	E6	214139_E6	E6	1	NA	1554.88	1123	0.47	1505.76	1634.12
25	chr1	4797439	4798383	945	sex-indep (robust)	TAD1_chr1	STAT5_sDHS	sex_indep_static (n=64,584)	not_bound	none	0	0	0	1	Prom_3	Prom	promoter	promoter	chr1	4797973	4797975	+	lypla1	TAD1_chr1	0	42.0587	36.7934	0.908401	-1.10084	0.707389	sex_indep	none	none	static	dDHS_open	static	static	static	207665_E7	E7	214145_E7	E7	1	NA	1451.33	1698	-0.23	1651.48	926.645
26	chr1	4798684	4799255	572	sex-indep (robust)	TAD1_chr1	STAT5_sDHS	sex_indep_static (n=64,584)	not_bound	none	0	0	0	0	Prom_4	Prom	promoter	promoter	chr1	4797973	4797975	+	lypla1	TAD1_chr1	710	42.0587	36.7934	0.908401	-1.10084	0.707389	sex_indep	none	none	none	none	none	none	none	207667_E7	E7	214147_E7	E7	1	NA	345.18	326	0.08	383.187	353.74
27	chr1	4800413	4800947	535	sex-indep (robust)	TAD1_chr1	STAT5_sDHS	sex_indep_static (n=64,584)	not_bound	none	0	0	0	0	Enh_8	Enh	enhancer	enhancer	chr1	4797973	4797975	+	lypla1	TAD1_chr1	2439	42.0587	36.7934	0.908401	-1.10084	0.707389	sex_indep	none	none	static	static	none	none	static	207670_E6	E6	214152_E6	E6	1	NA	527.184	657	-0.32	442.554	757.465
28	chr1	4819359	4819687	329	sex-indep (robust)	TAD1_chr1	STAT5_sDHS	sex_indep_static (n=64,584)	not_bound	none	0	0	0	0	WE_13	WE	weak_enhancer	enhancer	chr1	4797973	4797975	+	lypla1	TAD1_chr1	21385	42.0587	36.7934	0.908401	-1.10084	0.707389	sex_indep	none	none	static	static	static	static	static	207685_E6	E6	214156_E11	E11	0	NA	192.987	223	-0.21	226.674	330.67
29	chr1	4847417	4848573	1157	sex-indep (robust)	TAD1_chr1	STAT5_sDHS	sex_indep_static (n=64,584)	not_bound	none	0	0	0	0	Prom_5	Prom	promoter	promoter	chr1	4847774	4847776	+	tcea1	TAD1_chr1	0	13.7886	13.4218	1.01183	1.01183	1	sex_indep	none	none	static	dDHS_open	static	static	static	207695_E7	E7	214166_E7	E7	1	NA	1730.61	1821	-0.07	2050.86	1388.05
31	chr1	5072936	5073700	765	sex-indep (robust)	TAD1_chr1	STAT5_sDHS	sex_indep_static (n=64,584)	not_bound	none	0	0	0	0	Prom_6	Prom	promoter	promoter	chr1	5073253	5073255	+	atp6v1h	TAD1_chr1	0	11.4225	11.5576	1.05139	1.05139	1	sex_indep	none	none	static	static	static	static	static	207730_E8	E8	214204_E7	E7	0	NA	991.608	972	0.03	750.183	511.385
32	chr1	5124248	5124548	301	Male (standard)	TAD1_chr1	STAT5_hi_dDHS	male_bias_dynamic (n=834)	not_bound	none	0	0	0	3	WE_14	WE	weak_enhancer	enhancer	chr1	5073253	5073255	+	atp6v1h	TAD1_chr1	50994	11.4225	11.5576	1.05139	1.05139	1	sex_indep	none	none	static	none	static	none	none	207743_E6	E6	214215_E10	E10	0	0	346.749	138	1.33	80.955	157.645
33	chr1	5301758	5302078	321	Male (standard)	TAD1_chr1	STAT5_sDHS	male_bias_static (n=1895)	not_bound	none	0	0	0	0	WE_15	WE	weak_enhancer	enhancer	chr1	5073253	5073255	+	atp6v1h	TAD1_chr1	228504	11.4225	11.5576	1.05139	1.05139	1	sex_indep	none	none	static	none	none	none	none	207768_E6	E6	214243_E2	E2	0	NA	293.403	263	0.16	80.955	53.83
34	chr1	6203854	6205645	1792	sex-indep (robust)	TAD1_chr1	STAT5_sDHS	sex_indep_static (n=64,584)	not_bound	none	0	0	0	4	Prom_7	Prom	promoter	promoter	chr1	6204742	6204744	+	rb1cc1	TAD1_chr1	0	3.40051	3.59378	1.09964	1.09964	0.740705	sex_indep	none	none	static	static	static	static	static	207808_E7	E7	214297_E7	E7	1	NA	2078.93	2352	-0.18	1899.74	1576.45
35	chr1	6348914	6349604	691	sex-indep (standard)	TAD1_chr1	none	sex_indep_static (n=64,584)	not_bound	none	0	0	0	0	WE_16	WE	weak_enhancer	enhancer	chr1	6349411	6349413	+	fam150a	TAD1_chr1	0	0	0	1	1	1	None	none	none	none	none	none	none	none	207823_E7	E7	214319_E12	E12	0	NA	105.123	122	-0.21	242.865	115.35
36	chr1	6500620	6500920	301	sex-indep (standard)	TAD2_chr1	STAT5_sDHS	sex_indep_static (n=64,584)	not_bound	none	0	0	0	0	Enh_9	Enh	enhancer	enhancer	chr1	6477311	6477313	+	st18	TAD2_chr1	23308	0	0	1	1	1	None	none	none	static	static	none	none	none	207840_E6	E6	214334_E11	E11	0	NA	304.386	415	-0.45	118.734	173.025
37	chr1	6986138	6986326	189	Male (less stringent)	TAD2_chr1	STAT5_sDHS	male_bias_static (n=1895)	STAT5_bound	male_enriched	219	2	110.5	1	WE_17	WE	weak_enhancer	enhancer	chr1	7079000	7079002	+	pcmtd1	TAD2_chr1	92675	14.9231	14.6851	1.02141	1.02141	1	sex_indep	none	none	dDHS_close	static	none	none	none	207853_E6	E6	214349_E13	E13	0	NA	279.282	229	0.29	59.367	134.575
39	chr1	7196426	7196844	419	sex-indep (standard)	TAD2_chr1	STAT5_sDHS	sex_indep_static (n=64,584)	not_bound	none	0	0	0	0	WE_18	WE	weak_enhancer	enhancer	chr1	7168351	7168353	-	nc_inter_c1_21	TAD2_chr1	28074	0	0	1	1	1	None	none	none	static	none	none	none	none	207914_E7	E7	214417_E12	E12	0	NA	114.537	125	-0.13	129.528	107.66
40	chr1	7387004	7388684	1681	sex-indep (robust)	TAD3_chr1	STAT5_sDHS	sex_indep_static (n=64,584)	not_bound	none	0	0	0	3	Prom_8	Prom	promoter	promoter	chr1	9289956	9289958	-	sntg1	TAD3_chr1	1901273	0.182847	0.162614	0.921111	-1.08565	1	None	none	none	static	dDHS_open	static	static	static	207927_E7	E7	214443_E7	E7	1	NA	4920.38	5356	-0.12	5580.5	4410.22
41	chr1	8044741	8045168	428	Male (standard)	TAD3_chr1	STAT5_hi_dDHS	male_bias_dynamic (n=834)	STAT5_bound	common	259	100	179.5	0	WE_19	WE	weak_enhancer	enhancer	chr1	9289956	9289958	-	sntg1	TAD3_chr1	1244789	0.182847	0.162614	0.921111	-1.08565	1	None	none	none	dDHS_close	static	static	none	none	207943_E5	E5	214467_E10	E10	0	1000	616.617	213	1.53	86.352	207.63
42	chr1	8457539	8457761	223	sex-indep (robust)	TAD3_chr1	none	sex_indep_static (n=64,584)	not_bound	none	0	0	0	0	WE_20	WE	weak_enhancer	enhancer	chr1	9289956	9289958	-	sntg1	TAD3_chr1	832196	0.182847	0.162614	0.921111	-1.08565	1	None	none	none	none	none	none	none	none	207961_E12	E12	214486_E11	E11	0	NA	53.346	45	0.25	21.588	96.125
43	chr1	8631782	8632128	347	sex-indep (robust)	TAD3_chr1	STAT5_sDHS	sex_indep_static (n=64,584)	not_bound	none	0	0	0	0	WE_21	WE	weak_enhancer	enhancer	chr1	9289956	9289958	-	sntg1	TAD3_chr1	657829	0.182847	0.162614	0.921111	-1.08565	1	None	none	none	static	static	none	none	none	207978_E11	E11	214499_E12	E12	0	NA	196.125	248	-0.34	188.895	307.6
44	chr1	8862805	8863267	463	sex-indep (robust)	TAD3_chr1	STAT5_sDHS	sex_indep_static (n=64,584)	not_bound	none	0	0	0	0	Enh_10	Enh	enhancer	enhancer	chr1	9289956	9289958	-	sntg1	TAD3_chr1	426690	0.182847	0.162614	0.921111	-1.08565	1	None	none	none	static	dDHS_close	static	static	static	208004_E6	E6	214523_E6	E6	1	NA	674.67	588	0.2	464.142	895.885
45	chr1	9534966	9536379	1414	sex-indep (robust)	TAD4_chr1	STAT5_sDHS	sex_indep_static (n=64,584)	not_bound	none	0	0	0	1	Prom_9	Prom	promoter	promoter	chr1	9535488	9535490	+	rrs1	TAD4_chr1	0	3.86231	3.98751	1.06263	1.06263	1	sex_indep	none	none	static	static	static	static	static	208049_E7	E7	214569_E7	E7	1	NA	1423.08	1476	-0.05	1581.32	1388.05
46	chr1	9536505	9536779	275	sex-indep (standard)	TAD4_chr1	none	sex_indep_static (n=64,584)	not_bound	none	0	0	0	0	Prom_10	Prom	promoter	promoter	chr1	9535488	9535490	+	rrs1	TAD4_chr1	1016	3.86231	3.98751	1.06263	1.06263	1	sex_indep	none	none	none	none	none	none	none	208052_E8	E8	214569_E7	E7	0	NA	39.225	41	-0.06	53.97	30.76
47	chr1	9537821	9539305	1485	sex-indep (robust)	TAD4_chr1	STAT5_sDHS	sex_indep_static (n=64,584)	STAT5_bound	common	202	89	145.5	2	Prom_11	Prom	promoter	promoter	chr1	9538126	9538128	+	adhfe1	TAD4_chr1	0	15.3244	12.4702	0.843569	-1.18544	0.241548	sex_indep	none	none	static	static	dDHS_open	dDHS_open	static	208053_E7	E7	214571_E7	E7	1	NA	2179.34	1747	0.32	1608.31	1676.42
48	chr1	9539534	9539877	344	sex-indep (standard)	TAD4_chr1	none	sex_indep_static (n=64,584)	not_bound	none	0	0	0	0	WP_1	WP	weak_promoter	promoter	chr1	9538126	9538128	+	adhfe1	TAD4_chr1	1407	15.3244	12.4702	0.843569	-1.18544	0.241548	sex_indep	none	none	none	none	none	none	none	208055_E6	E6	214572_E8	E8	0	NA	81.588	94	-0.2	91.749	146.11
49	chr1	9540640	9540793	154	sex-indep (standard)	TAD4_chr1	none	sex_indep_static (n=64,584)	not_bound	none	0	0	0	0	Enh_11	Enh	enhancer	enhancer	chr1	9538126	9538128	+	adhfe1	TAD4_chr1	2513	15.3244	12.4702	0.843569	-1.18544	0.241548	sex_indep	none	none	none	none	none	none	none	208057_E6	E6	214574_E6	E6	1	NA	58.053	43	0.43	70.161	76.9
50	chr1	9549718	9549926	209	sex-indep (robust)	TAD4_chr1	STAT5_sDHS	sex_indep_static (n=64,584)	not_bound	none	0	0	0	0	WE_22	WE	weak_enhancer	enhancer	chr1	9538126	9538128	+	adhfe1	TAD4_chr1	11591	15.3244	12.4702	0.843569	-1.18544	0.241548	sex_indep	none	none	static	none	none	none	none	208061_E6	E6	214578_E6	E6	1	NA	69.036	66	0.06	97.146	84.59
51	chr1	9550146	9550345	200	sex-indep (robust)	TAD4_chr1	STAT5_sDHS	sex_indep_static (n=64,584)	not_bound	none	0	0	0	0	WE_23	WE	weak_enhancer	enhancer	chr1	9538126	9538128	+	adhfe1	TAD4_chr1	12019	15.3244	12.4702	0.843569	-1.18544	0.241548	sex_indep	none	none	static	none	none	none	none	208062_E9	E9	214580_E14	E14	0	NA	139.641	98	0.51	75.558	176.87
52	chr1	9553797	9554443	647	sex-indep (robust)	TAD4_chr1	STAT5_sDHS	sex_indep_static (n=64,584)	STAT5_bound	common	879	465	672	0	Enh_12	Enh	enhancer	enhancer	chr1	9538126	9538128	+	adhfe1	TAD4_chr1	15670	15.3244	12.4702	0.843569	-1.18544	0.241548	sex_indep	none	none	static	static	static	static	static	208067_E6	E6	214587_E6	E6	1	NA	530.322	401	0.4	458.745	415.26
53	chr1	9554594	9554891	298	sex-indep (standard)	TAD4_chr1	STAT5_sDHS	sex_indep_static (n=64,584)	STAT5_bound	common	879	465	672	0	Enh_13	Enh	enhancer	enhancer	chr1	9538126	9538128	+	adhfe1	TAD4_chr1	16467	15.3244	12.4702	0.843569	-1.18544	0.241548	sex_indep	none	none	static	static	static	static	static	208067_E6	E6	214589_E6	E6	1	NA	163.176	126	0.37	280.644	73.055
54	chr1	9555226	9555552	327	Male (standard)	TAD4_chr1	STAT5_sDHS	male_bias_static (n=1895)	STAT5_bound	common	879	465	672	2	Enh_14	Enh	enhancer	enhancer	chr1	9538126	9538128	+	adhfe1	TAD4_chr1	17099	15.3244	12.4702	0.843569	-1.18544	0.241548	sex_indep	none	none	static	static	dDHS_open	static	static	208069_E6	E6	214591_E6	E6	1	NA	464.424	246	0.92	221.277	311.445
55	chr1	9572483	9572687	205	sex-indep (robust)	TAD4_chr1	none	sex_indep_static (n=64,584)	STAT5_bound	common	140	66	103	0	Enh_15	Enh	enhancer	enhancer	chr1	9591347	9591349	+	3110035e14rik	TAD4_chr1	18661	0.021299	0.0128974	0.658824	-1.51786	1	None	none	none	none	none	none	none	none	208080_E6	E6	214599_E6	E6	1	NA	86.295	63	0.45	124.131	115.35
56	chr1	9574750	9575210	461	sex-indep (robust)	TAD4_chr1	STAT5_sDHS	sex_indep_static (n=64,584)	STAT5_bound	common	2507	3828	3167.5	4	WE_24	WE	weak_enhancer	enhancer	chr1	9591347	9591349	+	3110035e14rik	TAD4_chr1	16138	0.021299	0.0128974	0.658824	-1.51786	1	None	none	none	static	static	dDHS_open	dDHS_open	dDHS_open	208082_E6	E6	214606_E5	E5	0	NA	991.608	524	0.92	437.157	757.465
57	chr1	9611385	9612309	925	sex-indep (robust)	TAD4_chr1	STAT5_sDHS	sex_indep_static (n=64,584)	STAT5_bound	female_enriched	173	256	214.5	0	Insul_4	Insul	insulator	insulator	chr1	9621171	9621173	-	2610203c22rik	TAD4_chr1	8863	0.22752	0.192565	0.889839	-1.1238	1	None	none	none	static	static	static	static	static	208088_E5	E5	214615_E5	E5	1	NA	994.746	1009	-0.02	960.666	1426.49
60	chr1	9628731	9629371	641	sex-indep (robust)	TAD4_chr1	STAT5_sDHS	sex_indep_static (n=64,584)	STAT5_bound	common	318	443	380.5	0	Enh_16	Enh	enhancer	enhancer	chr1	9621171	9621173	-	2610203c22rik	TAD4_chr1	7559	0.22752	0.192565	0.889839	-1.1238	1	None	none	none	static	dDHS_open	static	dDHS_open	dDHS_open	208106_E6	E6	214633_E6	E6	1	NA	1090.45	997	0.13	1257.5	1499.55
61	chr1	9648590	9648730	141	sex-indep (standard)	TAD4_chr1	STAT5_sDHS	sex_indep_static (n=64,584)	not_bound	none	0	0	0	0	WE_25	WE	weak_enhancer	enhancer	chr1	9621171	9621173	-	2610203c22rik	TAD4_chr1	27418	0.22752	0.192565	0.889839	-1.1238	1	None	none	none	none	none	none	none	none	208110_E12	E12	214645_E12	E12	1	NA	51.777	62	-0.26	53.97	30.76
62	chr1	9689696	9691271	1576	sex-indep (robust)	TAD4_chr1	STAT5_sDHS	sex_indep_static (n=64,584)	not_bound	none	0	0	0	0	WP_2	WP	weak_promoter	promoter	chr1	9690288	9690290	-	mybl1	TAD4_chr1	0	0.0674098	0.0475216	0.760812	-1.31438	0.993243	None	none	none	dDHS_open	static	static	static	static	208113_E12	E12	214648_E5	E5	0	NA	1189.3	1307	-0.14	1538.14	1049.68
63	chr1	9736175	9736396	222	sex-indep (standard)	TAD4_chr1	none	sex_indep_static (n=64,584)	not_bound	none	0	0	0	0	WP_3	WP	weak_promoter	promoter	chr1	9690288	9690290	-	mybl1	TAD4_chr1	45886	0.0674098	0.0475216	0.760812	-1.31438	0.993243	None	none	none	none	none	none	none	none	208130_E8	E8	214672_E6	E6	0	NA	161.607	149	0.12	178.101	211.475
64	chr1	9736547	9737109	563	sex-indep (robust)	TAD4_chr1	none	sex_indep_static (n=64,584)	not_bound	none	0	0	0	0	WP_4	WP	weak_promoter	promoter	chr1	9690288	9690290	-	mybl1	TAD4_chr1	46258	0.0674098	0.0475216	0.760812	-1.31438	0.993243	None	none	none	none	none	none	none	none	208131_E7	E7	214673_E9	E9	0	NA	224.367	246	-0.13	323.82	296.065
65	chr1	9737357	9738977	1621	sex-indep (robust)	TAD5_chr1	STAT5_sDHS	sex_indep_static (n=64,584)	STAT5_bound	common	150	118	134	1	Prom_12	Prom	promoter	promoter	chr1	9737728	9737730	+	1700034p13rik	TAD5_chr1	0	0.264811	0.250175	1.01954	1.01954	1	None	none	none	dDHS_open	static	static	static	static	208133_E7	E7	214676_E7	E7	1	NA	2908.93	2963	-0.03	2752.47	2699.19
66	chr1	9787900	9788797	898	sex-indep (standard)	TAD5_chr1	STAT5_sDHS	sex_indep_static (n=64,584)	not_bound	none	0	0	0	0	Prom_13	Prom	promoter	promoter	chr1	9788210	9788212	+	sgk3	TAD5_chr1	0	1.51965	1.43647	0.984634	-1.01561	1	sex_indep	none	none	static	dDHS_open	static	static	static	208146_E7	E7	214689_E7	E7	1	NA	593.082	652	-0.14	615.258	369.12
67	chr1	9838261	9838887	627	sex-indep (robust)	TAD5_chr1	STAT5_sDHS	sex_indep_static (n=64,584)	not_bound	none	0	0	0	0	WP_5	WP	weak_promoter	promoter	chr1	9838361	9838363	+	sgk3	TAD5_chr1	0	1.51965	1.43647	0.984634	-1.01561	1	sex_indep	none	none	none	static	none	none	none	208166_E7	E7	214717_E7	E7	1	NA	203.97	212	-0.06	313.026	173.025
68	chr1	9840384	9840564	181	sex-indep (standard)	TAD5_chr1	STAT5_sDHS	sex_indep_static (n=64,584)	not_bound	none	0	0	0	1	Enh_17	Enh	enhancer	enhancer	chr1	9838361	9838363	+	sgk3	TAD5_chr1	2022	1.51965	1.43647	0.984634	-1.01561	1	sex_indep	none	none	static	none	none	none	none	208170_E11	E11	214721_E6	E6	0	NA	122.382	63	0.96	80.955	123.04
69	chr1	9897056	9897421	366	sex-indep (robust)	TAD5_chr1	STAT5_sDHS	sex_indep_static (n=64,584)	not_bound	none	0	0	0	0	WE_26	WE	weak_enhancer	enhancer	chr1	9898718	9898720	+	mcmdc2	TAD5_chr1	1298	0.207248	0.06629	0.333951	-2.99445	0.00185783	None	none	none	static	static	none	none	none	208182_E11	E11	214735_E12	E12	0	NA	238.488	242	-0.02	161.91	261.46
70	chr1	9911522	9911871	350	sex-indep (standard)	TAD5_chr1	STAT5_sDHS	sex_indep_static (n=64,584)	not_bound	none	0	0	0	0	WE_27	WE	weak_enhancer	enhancer	chr1	9898718	9898720	+	mcmdc2	TAD5_chr1	12803	0.207248	0.06629	0.333951	-2.99445	0.00185783	None	none	none	none	none	none	none	none	208189_E6	E6	214741_E6	E6	1	NA	138.072	110	0.33	183.498	142.265
71	chr1	9915129	9915283	155	sex-indep (standard)	TAD5_chr1	STAT5_sDHS	sex_indep_static (n=64,584)	STAT5_bound	male_enriched	253	47	150	2	WE_28	WE	weak_enhancer	enhancer	chr1	9898718	9898720	+	mcmdc2	TAD5_chr1	16410	0.207248	0.06629	0.333951	-2.99445	0.00185783	None	none	none	static	none	none	none	none	208193_E5	E5	214744_E13	E13	0	NA	119.244	24	2.31	64.764	23.07
72	chr1	9921976	9922233	258	sex-indep (robust)	TAD5_chr1	STAT5_hi_dDHS	sex_indep_dynamic (n=1532)	not_bound	none	0	0	0	0	WE_29	WE	weak_enhancer	enhancer	chr1	9932622	9932624	-	snord87	TAD5_chr1	10390	2.90202	0.819913	0.291465	-3.43094	0.0712088	None	none	none	dDHS_close	none	dDHS_open	dDHS_open	none	208198_E6	E6	214745_E11	E11	0	1110	320.076	82	1.96	86.352	130.73
73	chr1	9932935	9933186	252	sex-indep (standard)	TAD5_chr1	none	sex_indep_static (n=64,584)	not_bound	none	0	0	0	0	WP_6	WP	weak_promoter	promoter	chr1	9932622	9932624	-	snord87	TAD5_chr1	312	2.90202	0.819913	0.291465	-3.43094	0.0712088	None	none	none	none	none	none	none	none	208206_E8	E8	214752_E8	E8	1	NA	51.777	50	0.05	102.543	69.21
74	chr1	9933781	9934418	638	sex-indep (robust)	TAD5_chr1	STAT5_sDHS	sex_indep_static (n=64,584)	not_bound	none	0	0	0	1	Prom_14	Prom	promoter	promoter	chr1	9934197	9934199	-	snhg6	TAD5_chr1	0	8.24738	6.84797	0.858661	-1.1646	0.857109	sex_indep	none	none	static	static	static	static	static	208207_E7	E7	214753_E7	E7	1	NA	1226.96	1312	-0.1	1343.85	872.815
75	chr1	9934581	9934707	127	sex-indep (standard)	TAD5_chr1	STAT5_sDHS	sex_indep_static (n=64,584)	not_bound	none	0	0	0	1	Prom_15	Prom	promoter	promoter	chr1	9934197	9934199	-	snhg6	TAD5_chr1	383	8.24738	6.84797	0.858661	-1.1646	0.857109	sex_indep	none	none	none	none	none	none	none	208207_E7	E7	214754_E8	E8	0	NA	40.794	48	-0.23	43.176	38.45
76	chr1	9937477	9938082	606	sex-indep (robust)	TAD5_chr1	STAT5_hi_dDHS	sex_indep_dynamic (n=1532)	STAT5_bound	common	958	477	717.5	1	WE_30	WE	weak_enhancer	enhancer	chr1	9934197	9934199	-	snhg6	TAD5_chr1	3279	8.24738	6.84797	0.858661	-1.1646	0.857109	sex_indep	none	none	dDHS_close	static	dDHS_open	dDHS_open	dDHS_open	208210_E5	E5	214757_E11	E11	0	1111	801.759	434	0.89	404.775	619.045
77	chr1	9957087	9957591	505	sex-indep (robust)	TAD5_chr1	STAT5_sDHS	sex_indep_static (n=64,584)	not_bound	none	0	0	0	0	WP_7	WP	weak_promoter	promoter	chr1	9957564	9957566	-	tcf24	TAD5_chr1	0	1.18614	0.972692	0.857475	-1.16621	0.675047	None	none	none	static	none	none	none	none	208214_E8	E8	214762_E7	E7	0	NA	191.418	170	0.17	199.689	123.04
78	chr1	9957839	9958299	461	sex-indep (robust)	TAD5_chr1	STAT5_sDHS	sex_indep_static (n=64,584)	not_bound	none	0	0	0	0	WP_8	WP	weak_promoter	promoter	chr1	9957564	9957566	-	tcf24	TAD5_chr1	274	1.18614	0.972692	0.857475	-1.16621	0.675047	None	none	none	dDHS_open	none	static	static	static	208215_E7	E7	214764_E7	E7	1	NA	323.214	267	0.28	388.584	119.195
79	chr1	9959117	9959363	247	sex-indep (standard)	TAD5_chr1	none	sex_indep_static (n=64,584)	not_bound	none	0	0	0	0	WE_31	WE	weak_enhancer	enhancer	chr1	9957564	9957566	-	tcf24	TAD5_chr1	1552	1.18614	0.972692	0.857475	-1.16621	0.675047	None	none	none	none	none	none	none	none	208219_E11	E11	214767_E5	E5	0	NA	78.45	76	0.05	124.131	107.66
80	chr1	9971812	9972092	281	sex-indep (robust)	TAD5_chr1	STAT5_sDHS	sex_indep_static (n=64,584)	not_bound	none	0	0	0	0	WE_32	WE	weak_enhancer	enhancer	chr1	9957564	9957566	-	tcf24	TAD5_chr1	14247	1.18614	0.972692	0.857475	-1.16621	0.675047	None	none	none	static	static	none	none	none	208227_E6	E6	214773_E8	E8	0	NA	138.072	139	-0.01	97.146	180.715
81	chr1	9978661	9979421	761	sex-indep (robust)	TAD5_chr1	STAT5_sDHS	sex_indep_static (n=64,584)	STAT5_bound	male_enriched	316	45	180.5	1	WE_33	WE	weak_enhancer	enhancer	chr1	9999215	9999217	-	ppp1r42	TAD5_chr1	19795	0.177852	0.318253	1.88475	1.88475	0.165642	None	none	none	dDHS_close	dDHS_close	static	static	dDHS_open	208233_E6	E6	214783_E6	E6	1	NA	1718.06	1544	0.15	728.595	1422.65
82	chr1	9980057	9980364	308	sex-indep (standard)	TAD5_chr1	STAT5_sDHS	sex_indep_static (n=64,584)	not_bound	none	0	0	0	2	Insul_5	Insul	insulator	insulator	chr1	9999215	9999217	-	ppp1r42	TAD5_chr1	18852	0.177852	0.318253	1.88475	1.88475	0.165642	None	none	none	none	none	none	none	none	208235_E10	E10	214786_E5	E5	0	NA	202.401	172	0.23	107.94	180.715
83	chr1	10027519	10028561	1043	sex-indep (robust)	TAD5_chr1	STAT5_sDHS	sex_indep_static (n=64,584)	not_bound	none	0	0	0	0	Prom_16	Prom	promoter	promoter	chr1	10028238	10028240	-	cops5	TAD5_chr1	0	16.3499	16.7996	1.06523	1.06523	0.965846	sex_indep	none	none	static	dDHS_open	static	static	static	208248_E7	E7	214799_E7	E7	1	NA	1854.56	2075	-0.16	1516.56	1141.96
84	chr1	10029511	10030531	1021	sex-indep (robust)	TAD5_chr1	STAT5_sDHS	sex_indep_static (n=64,584)	not_bound	none	0	0	0	1	WP_9	WP	weak_promoter	promoter	chr1	10028298	10028300	+	cspp1	TAD5_chr1	1212	2.13582	2.18513	1.06207	1.06207	1	sex_indep	none	none	static	dDHS_open	static	static	static	208250_E7	E7	214801_E7	E7	1	NA	1319.53	1574	-0.25	1667.67	957.405
85	chr1	10079725	10079935	211	sex-indep (standard)	TAD5_chr1	STAT5_sDHS	sex_indep_static (n=64,584)	not_bound	none	0	0	0	0	Insul_6	Insul	insulator	insulator	chr1	10028298	10028300	+	cspp1	TAD5_chr1	51426	2.13582	2.18513	1.06207	1.06207	1	sex_indep	none	none	static	none	none	none	none	208259_E14	E14	214809_E14	E14	1	NA	42.363	58	-0.45	53.97	69.21
86	chr1	10132909	10133326	418	sex-indep (robust)	TAD5_chr1	STAT5_sDHS	sex_indep_static (n=64,584)	STAT5_bound	common	258	99	178.5	0	Enh_18	Enh	enhancer	enhancer	chr1	10222749	10222751	-	arfgef1	TAD5_chr1	89424	6.80581	7.0648	1.07789	1.07789	0.851028	sex_indep	none	none	static	static	static	static	static	208275_E6	E6	214820_E6	E6	1	NA	345.18	460	-0.41	366.996	622.89
87	chr1	10148446	10148785	340	Male (standard)	TAD5_chr1	none	male_bias_static (n=1895)	not_bound	none	0	0	0	1	WE_34	WE	weak_enhancer	enhancer	chr1	10222749	10222751	-	arfgef1	TAD5_chr1	73965	6.80581	7.0648	1.07789	1.07789	0.851028	sex_indep	none	none	none	none	none	none	none	208284_E6	E6	214822_E14	E14	0	NA	100.416	38	1.4	43.176	38.45
88	chr1	10202146	10202514	369	sex-indep (standard)	TAD5_chr1	STAT5_sDHS	sex_indep_static (n=64,584)	not_bound	none	0	0	0	0	WE_35	WE	weak_enhancer	enhancer	chr1	10222749	10222751	-	arfgef1	TAD5_chr1	20236	6.80581	7.0648	1.07789	1.07789	0.851028	sex_indep	none	none	static	none	none	none	static	208289_E14	E14	214824_E14	E14	1	NA	160.038	185	-0.21	248.262	165.335
89	chr1	10222120	10223601	1482	sex-indep (robust)	TAD5_chr1	STAT5_sDHS	sex_indep_static (n=64,584)	not_bound	none	0	0	0	0	Prom_17	Prom	promoter	promoter	chr1	10222749	10222751	-	arfgef1	TAD5_chr1	0	6.80581	7.0648	1.07789	1.07789	0.851028	sex_indep	none	none	static	static	static	static	static	208301_E7	E7	214832_E7	E7	1	NA	1223.82	1441	-0.24	1597.51	922.8
90	chr1	10594304	10594480	177	sex-indep (standard)	TAD5_chr1	STAT5_hi_dDHS	sex_indep_dynamic (n=1532)	not_bound	none	0	0	0	0	WE_36	WE	weak_enhancer	enhancer	chr1	10710024	10710026	-	cpa6	TAD5_chr1	115545	0	0	1	1	1	None	none	none	dDHS_close	static	none	none	none	208332_E9	E9	214863_E10	E10	0	1000	156.9	57	1.46	86.352	123.04
91	chr1	10867541	10867777	237	sex-indep (standard)	TAD5_chr1	none	sex_indep_static (n=64,584)	not_bound	none	0	0	0	0	WE_37	WE	weak_enhancer	enhancer	chr1	10983545	10983547	+	prex2	TAD5_chr1	115769	0.501133	0.347478	0.723151	-1.38284	0.0185775	None	none	none	none	none	none	none	none	208357_E10	E10	214880_E12	E12	0	NA	18.828	45	-1.26	80.955	46.14
92	chr1	10980815	10981309	495	sex-indep (standard)	TAD5_chr1	STAT5_sDHS	sex_indep_static (n=64,584)	not_bound	none	0	0	0	2	WE_38	WE	weak_enhancer	enhancer	chr1	10983545	10983547	+	prex2	TAD5_chr1	2237	0.501133	0.347478	0.723151	-1.38284	0.0185775	None	none	none	static	static	static	none	static	208362_E5	E5	214889_E5	E5	1	NA	243.195	248	-0.03	291.438	353.74
93	chr1	10983119	10984109	991	sex-indep (robust)	TAD5_chr1	STAT5_sDHS	sex_indep_static (n=64,584)	not_bound	none	0	0	0	0	WE_39	WE	weak_enhancer	enhancer	chr1	10983545	10983547	+	prex2	TAD5_chr1	0	0.501133	0.347478	0.723151	-1.38284	0.0185775	None	none	none	static	static	static	static	static	208367_E7	E7	214893_E7	E7	1	NA	666.825	874	-0.39	966.063	907.42
94	chr1	11007238	11007493	256	sex-indep (standard)	TAD5_chr1	STAT5_sDHS	sex_indep_static (n=64,584)	not_bound	none	0	0	0	1	WE_40	WE	weak_enhancer	enhancer	chr1	10983545	10983547	+	prex2	TAD5_chr1	23692	0.501133	0.347478	0.723151	-1.38284	0.0185775	None	none	none	none	none	none	none	none	208371_E11	E11	214901_E11	E11	1	NA	50.208	65	-0.37	97.146	103.815
95	chr1	11023463	11023843	381	sex-indep (standard)	TAD5_chr1	STAT5_sDHS	sex_indep_static (n=64,584)	not_bound	none	0	0	0	0	WE_41	WE	weak_enhancer	enhancer	chr1	10983545	10983547	+	prex2	TAD5_chr1	39917	0.501133	0.347478	0.723151	-1.38284	0.0185775	None	none	none	none	none	none	none	none	208373_E12	E12	214908_E5	E5	0	NA	101.985	78	0.39	113.337	80.745
96	chr1	11037154	11037374	221	sex-indep (standard)	TAD5_chr1	STAT5_sDHS	sex_indep_static (n=64,584)	not_bound	none	0	0	0	0	WE_42	WE	weak_enhancer	enhancer	chr1	10983545	10983547	+	prex2	TAD5_chr1	53608	0.501133	0.347478	0.723151	-1.38284	0.0185775	None	none	none	static	static	none	none	none	208380_E11	E11	214910_E13	E13	0	NA	87.864	68	0.37	134.925	157.645
97	chr1	11055435	11055640	206	sex-indep (standard)	TAD5_chr1	none	sex_indep_static (n=64,584)	not_bound	none	0	0	0	2	Insul_7	Insul	insulator	insulator	chr1	10983545	10983547	+	prex2	TAD5_chr1	71889	0.501133	0.347478	0.723151	-1.38284	0.0185775	None	none	none	none	none	none	none	none	208381_E13	E13	214913_E10	E10	0	NA	23.535	18	0.39	80.955	26.915
98	chr1	12708240	12708883	644	sex-indep (robust)	TAD5_chr1	STAT5_sDHS	sex_indep_static (n=64,584)	not_bound	none	0	0	0	4	WE_43	WE	weak_enhancer	enhancer	chr1	12708625	12708627	+	sulf1	TAD5_chr1	0	0.168366	0.193381	1.21692	1.21692	0.954555	None	none	none	dDHS_open	static	static	static	static	208455_E12	E12	214980_E12	E12	1	NA	243.195	227	0.1	534.303	299.91
99	chr1	13105724	13105984	261	sex-indep (robust)	TAD5_chr1	STAT5_hi_dDHS	sex_indep_dynamic (n=1532)	STAT5_bound	common	236	257	246.5	2	WE_44	WE	weak_enhancer	enhancer	chr1	12981214	12981216	-	slco5a1	TAD5_chr1	124509	0.00102484	0	0.275876	-3.62482	1	None	none	none	dDHS_close	static	static	static	static	208491_E8	E8	215037_E6	E6	0	1000	342.042	122	1.49	91.749	230.7
100	chr1	13106332	13106532	201	sex-indep (standard)	TAD5_chr1	none	sex_indep_static (n=64,584)	STAT5_bound	common	236	257	246.5	0	WE_45	WE	weak_enhancer	enhancer	chr1	12981214	12981216	-	slco5a1	TAD5_chr1	125117	0.00102484	0	0.275876	-3.62482	1	None	none	none	none	static	none	none	static	208492_E7	E7	215040_E11	E11	0	NA	178.866	113	0.66	91.749	107.66
101	chr1	13161281	13161510	230	sex-indep (robust)	TAD6_chr1	STAT5_sDHS	sex_indep_static (n=64,584)	not_bound	none	0	0	0	0	WE_46	WE	weak_enhancer	enhancer	chr1	13117242	13117244	-	prdm14	TAD6_chr1	44038	0.0112608	0.0132344	1.31865	1.31865	1	None	none	none	static	static	static	static	static	208500_E11	E11	215054_E5	E5	0	NA	100.416	115	-0.2	156.513	161.49
102	chr1	13193360	13194083	724	sex-indep (robust)	TAD6_chr1	STAT5_sDHS	sex_indep_static (n=64,584)	not_bound	none	0	0	0	0	Enh_19	Enh	enhancer	enhancer	chr1	13117242	13117244	-	prdm14	TAD6_chr1	76117	0.0112608	0.0132344	1.31865	1.31865	1	None	none	none	dDHS_close	static	none	none	none	208508_E5	E5	215070_E5	E5	1	NA	335.766	313	0.1	134.925	469.09
103	chr1	13194711	13194987	277	sex-indep (standard)	TAD6_chr1	STAT5_sDHS	sex_indep_static (n=64,584)	not_bound	none	0	0	0	0	Enh_20	Enh	enhancer	enhancer	chr1	13117242	13117244	-	prdm14	TAD6_chr1	77468	0.0112608	0.0132344	1.31865	1.31865	1	None	none	none	static	none	none	none	none	208512_E9	E9	215074_E6	E6	0	NA	119.244	138	-0.21	102.543	92.28
104	chr1	13231439	13231785	347	sex-indep (robust)	TAD6_chr1	STAT5_sDHS	sex_indep_static (n=64,584)	not_bound	none	0	0	0	0	Enh_21	Enh	enhancer	enhancer	chr1	13117242	13117244	-	prdm14	TAD6_chr1	114196	0.0112608	0.0132344	1.31865	1.31865	1	None	none	none	static	static	none	static	none	208533_E6	E6	215093_E6	E6	1	NA	229.074	235	-0.04	188.895	307.6
105	chr1	13256895	13257154	260	sex-indep (robust)	TAD6_chr1	none	sex_indep_static (n=64,584)	not_bound	none	0	0	0	0	WE_47	WE	weak_enhancer	enhancer	chr1	13362508	13362510	-	ncoa2	TAD6_chr1	105355	3.82712	3.7322	1.01322	1.01322	1	sex_indep	none	none	none	none	none	none	none	208543_E11	E11	215103_E11	E11	1	NA	43.932	56	-0.35	75.558	65.365
106	chr1	13277657	13278011	355	sex-indep (robust)	TAD6_chr1	none	sex_indep_static (n=64,584)	not_bound	none	0	0	0	0	Enh_22	Enh	enhancer	enhancer	chr1	13362508	13362510	-	ncoa2	TAD6_chr1	84498	3.82712	3.7322	1.01322	1.01322	1	sex_indep	none	none	none	none	none	none	none	208547_E11	E11	215112_E11	E11	1	NA	48.639	70	-0.53	48.573	42.295
107	chr1	13291615	13292087	473	sex-indep (robust)	TAD6_chr1	STAT5_sDHS	sex_indep_static (n=64,584)	not_bound	none	0	0	0	0	Enh_23	Enh	enhancer	enhancer	chr1	13362508	13362510	-	ncoa2	TAD6_chr1	70422	3.82712	3.7322	1.01322	1.01322	1	sex_indep	none	none	static	none	none	none	none	208558_E11	E11	215118_E11	E11	1	NA	182.004	198	-0.12	248.262	261.46
108	chr1	13295107	13295306	200	sex-indep (robust)	TAD6_chr1	STAT5_sDHS	sex_indep_static (n=64,584)	not_bound	none	0	0	0	0	Enh_24	Enh	enhancer	enhancer	chr1	13362508	13362510	-	ncoa2	TAD6_chr1	67203	3.82712	3.7322	1.01322	1.01322	1	sex_indep	none	none	none	none	none	none	none	208560_E6	E6	215122_E6	E6	1	NA	80.019	93	-0.22	124.131	130.73
109	chr1	13302706	13303034	329	sex-indep (robust)	TAD6_chr1	STAT5_sDHS	sex_indep_static (n=64,584)	not_bound	none	0	0	0	1	Enh_25	Enh	enhancer	enhancer	chr1	13362508	13362510	-	ncoa2	TAD6_chr1	59475	3.82712	3.7322	1.01322	1.01322	1	sex_indep	none	none	none	none	none	none	none	208568_E6	E6	215126_E6	E6	1	NA	149.055	180	-0.27	156.513	134.575
110	chr1	13304959	13305175	217	sex-indep (standard)	TAD6_chr1	none	sex_indep_static (n=64,584)	not_bound	none	0	0	0	0	Enh_26	Enh	enhancer	enhancer	chr1	13362508	13362510	-	ncoa2	TAD6_chr1	57334	3.82712	3.7322	1.01322	1.01322	1	sex_indep	none	none	none	none	none	none	none	208572_E11	E11	215128_E11	E11	1	NA	45.501	34	0.42	80.955	42.295
111	chr1	13313295	13313561	267	sex-indep (robust)	TAD6_chr1	STAT5_sDHS	sex_indep_static (n=64,584)	not_bound	none	0	0	0	0	Enh_27	Enh	enhancer	enhancer	chr1	13362508	13362510	-	ncoa2	TAD6_chr1	48948	3.82712	3.7322	1.01322	1.01322	1	sex_indep	none	none	none	none	none	none	none	208576_E11	E11	215130_E6	E6	0	NA	97.278	80	0.28	97.146	103.815
112	chr1	13333170	13333341	172	sex-indep (standard)	TAD6_chr1	STAT5_sDHS	sex_indep_static (n=64,584)	not_bound	none	0	0	0	0	WE_48	WE	weak_enhancer	enhancer	chr1	13362508	13362510	-	ncoa2	TAD6_chr1	29168	3.82712	3.7322	1.01322	1.01322	1	sex_indep	none	none	static	none	none	none	none	208582_E11	E11	215137_E11	E11	1	NA	78.45	55	0.51	97.146	57.675
114	chr1	13416474	13417271	798	sex-indep (standard)	TAD6_chr1	STAT5_sDHS	sex_indep_static (n=64,584)	not_bound	none	0	0	0	0	WP_10	WP	weak_promoter	promoter	chr1	13364162	13364164	-	ncoa2	TAD6_chr1	52311	3.82712	3.7322	1.01322	1.01322	1	sex_indep	none	none	static	static	static	static	static	208603_E7	E7	215159_E7	E7	1	NA	611.91	634	-0.05	550.494	545.99
115	chr1	13427808	13428051	244	sex-indep (standard)	TAD6_chr1	STAT5_sDHS	sex_indep_static (n=64,584)	STAT5_bound	common	90	81	85.5	0	WE_49	WE	weak_enhancer	enhancer	chr1	13364162	13364164	-	ncoa2	TAD6_chr1	63645	3.82712	3.7322	1.01322	1.01322	1	sex_indep	none	none	static	static	none	none	none	208606_E5	E5	215165_E5	E5	1	NA	213.384	154	0.47	91.749	261.46
116	chr1	13454452	13454705	254	sex-indep (standard)	TAD6_chr1	none	sex_indep_static (n=64,584)	not_bound	none	0	0	0	0	WE_50	WE	weak_enhancer	enhancer	chr1	13364162	13364164	-	ncoa2	TAD6_chr1	90289	3.82712	3.7322	1.01322	1.01322	1	sex_indep	none	none	none	none	none	none	none	208613_E5	E5	215180_E5	E5	1	NA	20.397	13	0.65	59.367	30.76
117	chr1	13456977	13457583	607	sex-indep (robust)	TAD6_chr1	STAT5_hi_dDHS	sex_indep_dynamic (n=1532)	STAT5_bound	common	1620	2951	2285.5	2	WE_51	WE	weak_enhancer	enhancer	chr1	13364162	13364164	-	ncoa2	TAD6_chr1	92814	3.82712	3.7322	1.01322	1.01322	1	sex_indep	none	none	dDHS_close	static	static	dDHS_open	none	208618_E7	E7	215184_E6	E6	0	1010	616.617	272	1.18	183.498	680.565
118	chr1	13477835	13478575	741	sex-indep (robust)	TAD6_chr1	STAT5_sDHS	sex_indep_static (n=64,584)	STAT5_bound	common	121	109	115	1	Enh_28	Enh	enhancer	enhancer	chr1	13579989	13579991	-	tram1	TAD6_chr1	101415	34.6779	35.2276	1.05514	1.05514	1	sex_indep	none	none	static	dDHS_close	static	static	static	208627_E6	E6	215193_E6	E6	1	NA	717.033	709	0.02	334.614	1253.47
119	chr1	13490665	13490847	183	sex-indep (standard)	TAD6_chr1	none	sex_indep_static (n=64,584)	not_bound	none	0	0	0	0	Insul_8	Insul	insulator	insulator	chr1	13579989	13579991	-	tram1	TAD6_chr1	89143	34.6779	35.2276	1.05514	1.05514	1	sex_indep	none	none	none	none	none	none	none	208635_E2	E2	215204_E5	E5	0	NA	40.794	50	-0.29	48.573	30.76
120	chr1	13551578	13552036	459	sex-indep (robust)	TAD6_chr1	STAT5_sDHS	sex_indep_static (n=64,584)	not_bound	none	0	0	0	0	WE_52	WE	weak_enhancer	enhancer	chr1	13579989	13579991	-	tram1	TAD6_chr1	27954	34.6779	35.2276	1.05514	1.05514	1	sex_indep	none	none	static	static	static	static	static	208646_E6	E6	215222_E7	E7	0	NA	338.904	322	0.07	501.921	480.625
121	chr1	13564871	13565403	533	sex-indep (robust)	TAD6_chr1	STAT5_sDHS	sex_indep_static (n=64,584)	not_bound	none	0	0	0	0	Enh_29	Enh	enhancer	enhancer	chr1	13579989	13579991	-	tram1	TAD6_chr1	14587	34.6779	35.2276	1.05514	1.05514	1	sex_indep	none	none	static	static	static	static	static	208654_E7	E7	215230_E6	E6	0	NA	508.356	598	-0.23	340.011	569.06
122	chr1	13565720	13565858	139	sex-indep (standard)	TAD6_chr1	none	sex_indep_static (n=64,584)	not_bound	none	0	0	0	0	Enh_30	Enh	enhancer	enhancer	chr1	13579989	13579991	-	tram1	TAD6_chr1	14132	34.6779	35.2276	1.05514	1.05514	1	sex_indep	none	none	none	none	none	none	none	208656_E9	E9	215231_E9	E9	1	NA	34.518	40	-0.21	37.779	30.76
123	chr1	13566547	13567111	565	sex-indep (robust)	TAD6_chr1	STAT5_sDHS	sex_indep_static (n=64,584)	not_bound	none	0	0	0	0	Enh_31	Enh	enhancer	enhancer	chr1	13579989	13579991	-	tram1	TAD6_chr1	12879	34.6779	35.2276	1.05514	1.05514	1	sex_indep	none	none	static	static	none	none	none	208657_E6	E6	215232_E6	E6	1	NA	404.802	326	0.31	183.498	365.275
124	chr1	13579082	13580391	1310	sex-indep (robust)	TAD6_chr1	STAT5_sDHS	sex_indep_static (n=64,584)	not_bound	none	0	0	0	1	Prom_18	Prom	promoter	promoter	chr1	13579989	13579991	-	tram1	TAD6_chr1	0	34.6779	35.2276	1.05514	1.05514	1	sex_indep	none	none	static	static	static	static	static	208666_E7	E7	215239_E7	E7	1	NA	1976.94	2185	-0.14	1824.19	1403.42
125	chr1	13618387	13618676	290	sex-indep (standard)	TAD6_chr1	STAT5_sDHS	sex_indep_static (n=64,584)	not_bound	none	0	0	0	2	WE_53	WE	weak_enhancer	enhancer	chr1	13627663	13627665	+	nc_as_c1_80	TAD6_chr1	8988	0.00612208	0.0127928	1.86711	1.86711	1	None	none	none	static	static	static	static	static	208680_E14	E14	215251_E6	E6	0	NA	105.123	132	-0.33	140.322	134.575
126	chr1	13618815	13619085	271	sex-indep (standard)	TAD6_chr1	STAT5_sDHS	sex_indep_static (n=64,584)	not_bound	none	0	0	0	1	WE_54	WE	weak_enhancer	enhancer	chr1	13627663	13627665	+	nc_as_c1_80	TAD6_chr1	8579	0.00612208	0.0127928	1.86711	1.86711	1	None	none	none	static	none	static	static	static	208680_E14	E14	215252_E11	E11	0	NA	114.537	77	0.57	124.131	88.435
127	chr1	13626627	13626736	110	sex-indep (standard)	TAD6_chr1	none	sex_indep_static (n=64,584)	not_bound	none	0	0	0	0	WE_55	WE	weak_enhancer	enhancer	chr1	13627663	13627665	+	nc_as_c1_80	TAD6_chr1	928	0.00612208	0.0127928	1.86711	1.86711	1	None	none	none	none	none	none	none	none	208680_E14	E14	215255_E14	E14	1	NA	37.656	38	-0.01	26.985	65.365
128	chr1	13629663	13629916	254	sex-indep (standard)	TAD6_chr1	STAT5_sDHS	sex_indep_static (n=64,584)	not_bound	none	0	0	0	0	WE_56	WE	weak_enhancer	enhancer	chr1	13627663	13627665	+	nc_as_c1_80	TAD6_chr1	1999	0.00612208	0.0127928	1.86711	1.86711	1	None	none	none	static	none	none	none	none	208680_E14	E14	215255_E14	E14	1	NA	83.157	64	0.38	118.734	46.14
129	chr1	13636607	13636794	188	sex-indep (robust)	TAD6_chr1	STAT5_sDHS	sex_indep_static (n=64,584)	not_bound	none	0	0	0	0	WE_57	WE	weak_enhancer	enhancer	chr1	13627663	13627665	+	nc_as_c1_80	TAD6_chr1	8943	0.00612208	0.0127928	1.86711	1.86711	1	None	none	none	static	static	none	none	none	208685_E14	E14	215258_E11	E11	0	NA	111.399	122	-0.13	134.925	157.645
130	chr1	13646247	13646653	407	sex-indep (robust)	TAD6_chr1	STAT5_sDHS	sex_indep_static (n=64,584)	not_bound	none	0	0	0	0	Prom_19	Prom	promoter	promoter	chr1	13650588	13650590	-	lactb2	TAD6_chr1	3936	63.5889	74.9133	1.22323	1.22323	0.0567676	None	none	none	static	static	none	none	none	208698_E7	E7	215268_E6	E6	0	NA	360.87	422	-0.23	345.408	499.85
131	chr1	13648197	13648467	271	sex-indep (standard)	TAD6_chr1	STAT5_sDHS	sex_indep_static (n=64,584)	not_bound	none	0	0	0	0	Prom_20	Prom	promoter	promoter	chr1	13650588	13650590	-	lactb2	TAD6_chr1	2122	63.5889	74.9133	1.22323	1.22323	0.0567676	None	none	none	static	none	none	none	none	208700_E7	E7	215270_E7	E7	1	NA	225.936	280	-0.31	221.277	215.32
132	chr1	13648717	13649245	529	sex-indep (robust)	TAD6_chr1	STAT5_sDHS	sex_indep_static (n=64,584)	not_bound	none	0	0	0	0	Prom_21	Prom	promoter	promoter	chr1	13650588	13650590	-	lactb2	TAD6_chr1	1344	63.5889	74.9133	1.22323	1.22323	0.0567676	None	none	none	none	static	none	none	none	208700_E7	E7	215272_E7	E7	1	NA	489.528	633	-0.37	334.614	488.315
133	chr1	13649607	13649811	205	sex-indep (standard)	TAD6_chr1	none	sex_indep_static (n=64,584)	not_bound	none	0	0	0	0	Prom_22	Prom	promoter	promoter	chr1	13650588	13650590	-	lactb2	TAD6_chr1	778	63.5889	74.9133	1.22323	1.22323	0.0567676	None	none	none	none	none	none	none	none	208701_E8	E8	215274_E7	E7	0	NA	117.675	137	-0.22	172.704	119.195
134	chr1	13649975	13651025	1051	sex-indep (robust)	TAD6_chr1	STAT5_sDHS	sex_indep_static (n=64,584)	not_bound	none	0	0	0	0	Prom_23	Prom	promoter	promoter	chr1	13650588	13650590	-	lactb2	TAD6_chr1	0	63.5889	74.9133	1.22323	1.22323	0.0567676	None	none	none	static	static	static	static	static	208702_E7	E7	215276_E7	E7	1	NA	2256.22	2345	-0.06	1781.01	1868.67
135	chr1	13658706	13658980	275	sex-indep (robust)	TAD6_chr1	STAT5_sDHS	sex_indep_static (n=64,584)	STAT5_bound	common	228	78	153	2	Prom_24	Prom	promoter	promoter	chr1	13658851	13658853	+	xkr9	TAD6_chr1	0	5.07961	6.60493	1.35057	1.35057	0.000852964	None	none	none	dDHS_close	static	static	static	static	208710_E7	E7	215284_E7	E7	1	NA	544.443	760	-0.48	221.277	553.68
136	chr1	13659716	13660019	304	sex-indep (robust)	TAD6_chr1	STAT5_sDHS	sex_indep_static (n=64,584)	STAT5_bound	common	228	78	153	1	Prom_25	Prom	promoter	promoter	chr1	13658851	13658853	+	xkr9	TAD6_chr1	864	5.07961	6.60493	1.35057	1.35057	0.000852964	None	none	none	none	static	none	none	none	208713_E8	E8	215286_E7	E7	0	NA	240.057	317	-0.4	183.498	269.15
137	chr1	13667694	13668289	596	sex-indep (robust)	TAD6_chr1	STAT5_sDHS	sex_indep_static (n=64,584)	not_bound	none	0	0	0	0	Enh_32	Enh	enhancer	enhancer	chr1	13658851	13658853	+	xkr9	TAD6_chr1	8842	5.07961	6.60493	1.35057	1.35057	0.000852964	None	none	none	static	dDHS_close	static	static	static	208717_E6	E6	215294_E6	E6	1	NA	641.721	808	-0.33	388.584	880.505
138	chr1	13668645	13668794	150	sex-indep (robust)	TAD6_chr1	STAT5_sDHS	sex_indep_static (n=64,584)	not_bound	none	0	0	0	0	Enh_33	Enh	enhancer	enhancer	chr1	13658851	13658853	+	xkr9	TAD6_chr1	9793	5.07961	6.60493	1.35057	1.35057	0.000852964	None	none	none	static	static	none	none	none	208719_E6	E6	215296_E6	E6	1	NA	122.382	158	-0.37	70.161	149.955
139	chr1	13685900	13686180	281	sex-indep (robust)	TAD6_chr1	none	sex_indep_static (n=64,584)	not_bound	none	0	0	0	0	WE_58	WE	weak_enhancer	enhancer	chr1	13658851	13658853	+	xkr9	TAD6_chr1	27048	5.07961	6.60493	1.35057	1.35057	0.000852964	None	none	none	none	none	none	none	none	208737_E6	E6	215314_E6	E6	1	NA	98.847	121	-0.29	97.146	126.885
140	chr1	13689206	13689467	262	sex-indep (standard)	TAD6_chr1	STAT5_sDHS	sex_indep_static (n=64,584)	not_bound	none	0	0	0	0	WE_59	WE	weak_enhancer	enhancer	chr1	13658851	13658853	+	xkr9	TAD6_chr1	30354	5.07961	6.60493	1.35057	1.35057	0.000852964	None	none	none	static	none	none	none	none	208744_E6	E6	215319_E9	E9	0	NA	119.244	139	-0.22	118.734	126.885
141	chr1	13689727	13690098	372	sex-indep (robust)	TAD6_chr1	STAT5_sDHS	sex_indep_static (n=64,584)	not_bound	none	0	0	0	0	WE_60	WE	weak_enhancer	enhancer	chr1	13658851	13658853	+	xkr9	TAD6_chr1	30875	5.07961	6.60493	1.35057	1.35057	0.000852964	None	none	none	static	static	static	static	static	208746_E6	E6	215320_E6	E6	1	NA	498.942	504	-0.01	259.056	472.935
142	chr1	13797774	13798111	338	Male (standard)	TAD7_chr1	STAT5_hi_dDHS	male_bias_dynamic (n=834)	STAT5_bound	male_enriched	761	10	385.5	2	WE_61	WE	weak_enhancer	enhancer	chr1	13777008	13777010	-	gm5523	TAD7_chr1	20765	0.0159388	0.00942223	0.592735	-1.68709	1	None	none	none	static	none	static	static	none	208760_E6	E6	215329_E12	E12	0	0	385.974	105	1.88	97.146	76.9
143	chr1	14785165	14785518	354	sex-indep (standard)	TAD7_chr1	STAT5_sDHS	sex_indep_static (n=64,584)	not_bound	none	0	0	0	3	WE_62	WE	weak_enhancer	enhancer	chr1	14746045	14746047	-	msc	TAD7_chr1	39119	0.142318	0.1278	0.946861	-1.05612	1	None	none	none	static	static	static	static	static	208801_E5	E5	215383_E12	E12	0	NA	144.348	143	0.01	269.85	173.025
144	chr1	15598335	15598956	622	sex-indep (robust)	TAD8_chr1	STAT5_sDHS	sex_indep_static (n=64,584)	STAT5_bound	female_enriched	61	75	68	0	Enh_34	Enh	enhancer	enhancer	chr1	15795726	15795728	+	terf1	TAD8_chr1	196771	2.31393	2.06484	0.929412	-1.07595	1	sex_indep	none	none	static	dDHS_close	static	static	static	208849_E6	E6	215435_E6	E6	1	NA	811.173	942	-0.22	420.966	1438.03
145	chr1	15599570	15599954	385	sex-indep (robust)	TAD8_chr1	STAT5_sDHS	sex_indep_static (n=64,584)	STAT5_bound	common	149	192	170.5	0	WP_11	WP	weak_promoter	promoter	chr1	15795726	15795728	+	terf1	TAD8_chr1	195773	2.31393	2.06484	0.929412	-1.07595	1	sex_indep	none	none	none	static	none	none	none	208852_E7	E7	215437_E7	E7	1	NA	271.437	265	0.03	113.337	430.64
146	chr1	15600135	15600432	298	sex-indep (standard)	TAD8_chr1	none	sex_indep_static (n=64,584)	STAT5_bound	common	149	192	170.5	0	WP_12	WP	weak_promoter	promoter	chr1	15795726	15795728	+	terf1	TAD8_chr1	195295	2.31393	2.06484	0.929412	-1.07595	1	sex_indep	none	none	none	none	none	none	none	208853_E8	E8	215438_E8	E8	1	NA	153.762	117	0.39	129.528	123.04
147	chr1	15600641	15601088	448	sex-indep (robust)	TAD8_chr1	STAT5_sDHS	sex_indep_static (n=64,584)	STAT5_bound	common	149	192	170.5	1	WP_13	WP	weak_promoter	promoter	chr1	15795726	15795728	+	terf1	TAD8_chr1	194639	2.31393	2.06484	0.929412	-1.07595	1	sex_indep	none	none	static	static	static	static	static	208855_E6	E6	215440_E5	E5	0	NA	364.008	393	-0.11	264.453	845.9
148	chr1	15605727	15605971	245	sex-indep (robust)	TAD8_chr1	STAT5_sDHS	sex_indep_static (n=64,584)	not_bound	none	0	0	0	0	Enh_35	Enh	enhancer	enhancer	chr1	15795726	15795728	+	terf1	TAD8_chr1	189756	2.31393	2.06484	0.929412	-1.07595	1	sex_indep	none	none	static	static	static	none	static	208861_E6	E6	215450_E6	E6	1	NA	260.454	252	0.05	145.719	284.53
149	chr1	15795316	15796771	1456	sex-indep (robust)	TAD8_chr1	STAT5_sDHS	sex_indep_static (n=64,584)	not_bound	none	0	0	0	2	Prom_26	Prom	promoter	promoter	chr1	15795726	15795728	+	terf1	TAD8_chr1	0	2.31393	2.06484	0.929412	-1.07595	1	sex_indep	none	none	static	static	static	static	static	208872_E7	E7	215466_E7	E7	1	NA	2257.79	2468	-0.13	2326.11	1884.05
150	chr1	15806998	15807375	378	sex-indep (robust)	TAD8_chr1	STAT5_sDHS	sex_indep_static (n=64,584)	not_bound	none	0	0	0	0	Enh_36	Enh	enhancer	enhancer	chr1	15795726	15795728	+	terf1	TAD8_chr1	11271	2.31393	2.06484	0.929412	-1.07595	1	sex_indep	none	none	static	static	static	static	static	208882_E6	E6	215476_E6	E6	1	NA	207.108	238	-0.2	232.071	349.895
151	chr1	15823330	15823946	617	Male (robust)	TAD8_chr1	STAT5_sDHS	male_bias_static (n=1895)	STAT5_bound	male_enriched	567	58	312.5	0	WE_63	WE	weak_enhancer	enhancer	chr1	15795726	15795728	+	terf1	TAD8_chr1	27603	2.31393	2.06484	0.929412	-1.07595	1	sex_indep	none	none	dDHS_close	static	static	static	static	208891_E6	E6	215483_E11	E11	0	NA	1110.85	1035	0.1	528.906	595.975
152	chr1	15867197	15867560	364	Male (less stringent)	TAD8_chr1	STAT5_sDHS	male_bias_static (n=1895)	not_bound	none	0	0	0	0	WE_64	WE	weak_enhancer	enhancer	chr1	15882801	15882803	-	sbspon	TAD8_chr1	15242	0.0277813	0.0199719	0.778878	-1.2839	1	None	none	none	static	static	dDHS_open	static	static	208900_E6	E6	215491_E11	E11	0	NA	498.942	349	0.52	242.865	219.165
153	chr1	15947796	15948047	252	sex-indep (standard)	TAD8_chr1	none	sex_indep_static (n=64,584)	not_bound	none	0	0	0	0	WE_65	WE	weak_enhancer	enhancer	chr1	15882801	15882803	-	sbspon	TAD8_chr1	64994	0.0277813	0.0199719	0.778878	-1.2839	1	None	none	none	none	none	none	none	none	208909_E2	E2	215501_E12	E12	0	NA	26.673	37	-0.47	48.573	23.07
154	chr1	15986937	15987673	737	sex-indep (robust)	TAD8_chr1	STAT5_sDHS	sex_indep_static (n=64,584)	not_bound	none	0	0	0	0	Enh_37	Enh	enhancer	enhancer	chr1	16083120	16083122	-	4930444p10rik	TAD8_chr1	95448	0	0	1	1	1	None	none	none	static	dDHS_close	static	static	static	208915_E6	E6	215513_E12	E12	0	NA	458.148	525	-0.2	296.835	676.72
155	chr1	15987742	15987972	231	sex-indep (standard)	TAD8_chr1	none	sex_indep_static (n=64,584)	not_bound	none	0	0	0	0	Enh_38	Enh	enhancer	enhancer	chr1	16083120	16083122	-	4930444p10rik	TAD8_chr1	95149	0	0	1	1	1	None	none	none	none	none	none	none	none	208918_E2	E2	215513_E12	E12	0	NA	34.518	38	-0.14	70.161	69.21
157	chr1	16101882	16102240	359	sex-indep (robust)	TAD8_chr1	STAT5_sDHS	sex_indep_static (n=64,584)	not_bound	none	0	0	0	0	Enh_39	Enh	enhancer	enhancer	chr1	16095962	16095964	+	rdh10	TAD8_chr1	5919	6.23586	5.2365	0.873646	-1.14463	0.377867	sex_indep	none	none	static	static	none	none	none	208942_E11	E11	215536_E11	E11	1	NA	182.004	190	-0.06	232.071	311.445
158	chr1	16162046	16162360	315	sex-indep (robust)	TAD8_chr1	STAT5_sDHS	sex_indep_static (n=64,584)	not_bound	none	0	0	0	0	WE_66	WE	weak_enhancer	enhancer	chr1	16095962	16095964	+	rdh10	TAD8_chr1	66083	6.23586	5.2365	0.873646	-1.14463	0.377867	sex_indep	none	none	static	static	none	none	none	208955_E7	E7	215564_E6	E6	0	NA	147.486	168	-0.19	172.704	149.955
159	chr1	16162614	16162864	251	sex-indep (robust)	TAD8_chr1	STAT5_sDHS	sex_indep_static (n=64,584)	not_bound	none	0	0	0	0	WE_67	WE	weak_enhancer	enhancer	chr1	16095962	16095964	+	rdh10	TAD8_chr1	66651	6.23586	5.2365	0.873646	-1.14463	0.377867	sex_indep	none	none	static	none	none	none	none	208956_E6	E6	215564_E6	E6	1	NA	65.898	85	-0.37	37.779	61.52
160	chr1	16176586	16176769	184	sex-indep (standard)	TAD8_chr1	STAT5_sDHS	sex_indep_static (n=64,584)	not_bound	none	0	0	0	0	WE_68	WE	weak_enhancer	enhancer	chr1	16095962	16095964	+	rdh10	TAD8_chr1	80623	6.23586	5.2365	0.873646	-1.14463	0.377867	sex_indep	none	none	none	none	none	none	none	208963_E2	E2	215572_E9	E9	0	NA	34.518	38	-0.14	37.779	30.76
161	chr1	16189260	16189759	500	sex-indep (robust)	TAD8_chr1	STAT5_sDHS	sex_indep_static (n=64,584)	STAT5_bound	common	578	301	439.5	0	Insul_9	Insul	insulator	insulator	chr1	16095962	16095964	+	rdh10	TAD8_chr1	93297	6.23586	5.2365	0.873646	-1.14463	0.377867	sex_indep	none	none	static	dDHS_close	static	static	static	208966_E6	E6	215578_E6	E6	1	NA	520.908	505	0.04	302.232	884.35
162	chr1	16218027	16218779	753	sex-indep (robust)	TAD8_chr1	STAT5_sDHS	sex_indep_static (n=64,584)	not_bound	none	0	0	0	0	WE_69	WE	weak_enhancer	enhancer	chr1	16095962	16095964	+	rdh10	TAD8_chr1	122064	6.23586	5.2365	0.873646	-1.14463	0.377867	sex_indep	none	none	static	static	static	dDHS_open	static	208975_E6	E6	215589_E6	E6	1	NA	542.874	413	0.39	717.801	465.245
163	chr1	16300098	16300404	307	sex-indep (robust)	TAD8_chr1	STAT5_sDHS	sex_indep_static (n=64,584)	not_bound	none	0	0	0	0	Enh_40	Enh	enhancer	enhancer	chr1	16095962	16095964	+	rdh10	TAD8_chr1	204135	6.23586	5.2365	0.873646	-1.14463	0.377867	sex_indep	none	none	static	static	none	none	static	208993_E6	E6	215602_E6	E6	1	NA	180.435	180	0	113.337	284.53
164	chr1	16509099	16509477	379	sex-indep (robust)	TAD9_chr1	STAT5_sDHS	sex_indep_static (n=64,584)	not_bound	none	0	0	0	0	WP_14	WP	weak_promoter	promoter	chr1	16509381	16509383	-	stau2	TAD9_chr1	0	1.06517	1.03028	0.991022	-1.00906	1	sex_indep	none	none	static	static	static	static	static	209027_E7	E7	215641_E7	E7	1	NA	263.592	274	-0.06	205.086	142.265
165	chr1	16509963	16510173	211	sex-indep (standard)	TAD9_chr1	STAT5_sDHS	sex_indep_static (n=64,584)	not_bound	none	0	0	0	0	Prom_27	Prom	promoter	promoter	chr1	16509381	16509383	-	stau2	TAD9_chr1	581	1.06517	1.03028	0.991022	-1.00906	1	sex_indep	none	none	static	none	none	none	none	209030_E8	E8	215643_E12	E12	0	NA	128.658	132	-0.04	151.116	26.915
166	chr1	16608656	16609818	1163	sex-indep (robust)	TAD9_chr1	STAT5_sDHS	sex_indep_static (n=64,584)	not_bound	none	0	0	0	1	Prom_28	Prom	promoter	promoter	chr1	16609417	16609419	-	ube2w	TAD9_chr1	0	3.05565	2.86195	0.972008	-1.0288	1	sex_indep	none	none	static	static	static	static	static	209053_E7	E7	215670_E7	E7	1	NA	1103.01	1114	-0.01	1014.64	834.365
167	chr1	16646523	16647735	1213	sex-indep (robust)	TAD9_chr1	STAT5_sDHS	sex_indep_static (n=64,584)	STAT5_bound	common	363	474	418.5	5	Prom_29	Prom	promoter	promoter	chr1	16646944	16646946	-	tceb1	TAD9_chr1	0	14.6862	13.6674	0.966793	-1.03435	1	sex_indep	none	none	static	dDHS_open	static	static	static	209067_E7	E7	215686_E7	E7	1	NA	3701.27	3500	0.08	4323	3214.42
168	chr1	16655091	16655819	729	sex-indep (robust)	TAD9_chr1	STAT5_sDHS	sex_indep_static (n=64,584)	not_bound	none	0	0	0	2	Prom_30	Prom	promoter	promoter	chr1	16655271	16655273	+	tmem70	TAD9_chr1	0	11.5807	10.9523	0.980926	-1.01945	1	sex_indep	none	none	static	static	static	static	static	209073_E7	E7	215692_E7	E7	1	NA	715.464	640	0.16	690.816	438.33
169	chr1	16678382	16678866	485	sex-indep (robust)	TAD9_chr1	STAT5_sDHS	sex_indep_static (n=64,584)	not_bound	none	0	0	0	0	Prom_31	Prom	promoter	promoter	chr1	16678536	16678538	+	ly96	TAD9_chr1	0	2.06034	1.77377	0.900044	-1.11106	1	sex_indep	none	none	static	static	static	static	static	209087_E7	E7	215708_E7	E7	1	NA	467.562	449	0.06	582.876	430.64
170	chr1	16679005	16679136	132	sex-indep (standard)	TAD9_chr1	STAT5_sDHS	sex_indep_static (n=64,584)	not_bound	none	0	0	0	0	Prom_32	Prom	promoter	promoter	chr1	16678536	16678538	+	ly96	TAD9_chr1	468	2.06034	1.77377	0.900044	-1.11106	1	sex_indep	none	none	static	none	none	none	none	209087_E7	E7	215709_E8	E8	0	NA	56.484	62	-0.13	64.764	73.055
172	chr1	20048327	20048793	467	sex-indep (robust)	TAD11_chr1	STAT5_sDHS	sex_indep_static (n=64,584)	STAT5_bound	common	181	178	179.5	3	Insul_10	Insul	insulator	insulator	chr1	19202134	19202136	+	tfap2b	TAD11_chr1	846192	0	0	1	1	1	None	none	none	static	static	static	static	none	209219_E5	E5	215880_E5	E5	1	NA	269.868	194	0.48	183.498	230.7
173	chr1	20059807	20060228	422	sex-indep (robust)	TAD11_chr1	STAT5_hi_dDHS	sex_indep_dynamic (n=1532)	STAT5_bound	common	215	103	159	3	WE_70	WE	weak_enhancer	enhancer	chr1	19202134	19202136	+	tfap2b	TAD11_chr1	857672	0	0	1	1	1	None	none	none	static	static	dDHS_open	dDHS_open	static	209221_E11	E11	215884_E5	E5	0	110	740.568	285	1.38	259.056	438.33
174	chr1	20121978	20122698	721	sex-indep (robust)	TAD11_chr1	STAT5_sDHS	sex_indep_static (n=64,584)	not_bound	none	0	0	0	1	WE_71	WE	weak_enhancer	enhancer	chr1	19202134	19202136	+	tfap2b	TAD11_chr1	919843	0	0	1	1	1	None	none	none	static	static	dDHS_close	dDHS_close	static	209233_E6	E6	215901_E6	E6	1	NA	3031.31	3076	-0.02	2833.43	3595.07
175	chr1	20147446	20147592	147	sex-indep (standard)	TAD11_chr1	STAT5_sDHS	sex_indep_static (n=64,584)	not_bound	none	0	0	0	0	WE_72	WE	weak_enhancer	enhancer	chr1	19202134	19202136	+	tfap2b	TAD11_chr1	945311	0	0	1	1	1	None	none	none	none	none	none	none	none	209237_E11	E11	215910_E11	E11	1	NA	43.932	45	-0.03	21.588	30.76
176	chr1	20471898	20472304	407	Female (standard)	TAD12_chr1	STAT5_sDHS	female_bias_static (n=1359)	not_bound	none	0	0	0	0	WE_73	WE	weak_enhancer	enhancer	chr1	20346535	20346537	+	nc_as_c1_92	TAD12_chr1	125362	0	0	1	1	1	None	none	none	static	static	none	static	none	209253_E6	E6	215968_E6	E6	1	NA	227.505	244	-0.1	221.277	630.58
177	chr1	20608004	20608298	295	sex-indep (robust)	TAD13_chr1	STAT5_sDHS	sex_indep_static (n=64,584)	not_bound	none	0	0	0	0	WE_74	WE	weak_enhancer	enhancer	chr1	20608136	20608138	-	pkhd1	TAD13_chr1	0	0.443091	0.339305	0.789368	-1.26684	0.382669	None	none	none	static	static	none	none	none	209271_E7	E7	216008_E7	E7	1	NA	138.072	156	-0.18	161.91	226.855
178	chr1	20643817	20644497	681	sex-indep (standard)	TAD13_chr1	STAT5_sDHS	sex_indep_static (n=64,584)	not_bound	none	0	0	0	0	WE_75	WE	weak_enhancer	enhancer	chr1	20669090	20669092	+	mir206	TAD13_chr1	24594	0	0	1	1	1	None	none	none	static	static	static	dDHS_open	static	209278_E6	E6	216017_E6	E6	1	NA	334.197	576	-0.79	431.76	865.125
179	chr1	20809974	20810831	858	sex-indep (robust)	TAD13_chr1	STAT5_sDHS	sex_indep_static (n=64,584)	not_bound	none	0	0	0	1	WE_76	WE	weak_enhancer	enhancer	chr1	20810292	20810294	-	mcm3	TAD13_chr1	0	0.872531	0.787974	0.940458	-1.06331	1	None	none	none	static	static	static	static	static	209296_E7	E7	216046_E8	E8	0	NA	830.001	818	0.02	1111.78	1126.59
181	chr1	20925172	20925654	483	sex-indep (standard)	TAD14_chr1	none	sex_indep_static (n=64,584)	not_bound	none	0	0	0	0	WE_77	WE	weak_enhancer	enhancer	chr1	20941706	20941708	+	efhc1	TAD14_chr1	16053	0.0602815	0.0323154	0.560039	-1.78559	0.939851	None	none	none	none	none	none	none	none	209319_E5	E5	216066_E13	E13	0	NA	37.656	53	-0.49	107.94	61.52
182	chr1	20929200	20929359	160	sex-indep (standard)	TAD14_chr1	STAT5_sDHS	sex_indep_static (n=64,584)	not_bound	none	0	0	0	0	Insul_11	Insul	insulator	insulator	chr1	20941706	20941708	+	efhc1	TAD14_chr1	12348	0.0602815	0.0323154	0.560039	-1.78559	0.939851	None	none	none	static	static	none	static	none	209321_E11	E11	216068_E5	E5	0	NA	61.191	59	0.05	86.352	65.365
183	chr1	20941292	20942155	864	sex-indep (robust)	TAD14_chr1	STAT5_sDHS	sex_indep_static (n=64,584)	not_bound	none	0	0	0	0	WE_78	WE	weak_enhancer	enhancer	chr1	20941706	20941708	+	efhc1	TAD14_chr1	0	0.0602815	0.0323154	0.560039	-1.78559	0.939851	None	none	none	static	static	static	static	static	209328_E12	E12	216071_E8	E8	0	NA	484.821	600	-0.31	847.329	545.99
184	chr1	20984556	20984721	166	sex-indep (standard)	TAD14_chr1	none	sex_indep_static (n=64,584)	not_bound	none	0	0	0	0	Insul_12	Insul	insulator	insulator	chr1	20941706	20941708	+	efhc1	TAD14_chr1	42849	0.0602815	0.0323154	0.560039	-1.78559	0.939851	None	none	none	none	none	none	none	none	209331_E13	E13	216075_E11	E11	0	NA	64.329	43	0.58	53.97	53.83
185	chr1	20992614	20993268	655	sex-indep (standard)	TAD14_chr1	none	sex_indep_static (n=64,584)	not_bound	none	0	0	0	0	Insul_13	Insul	insulator	insulator	chr1	20941706	20941708	+	efhc1	TAD14_chr1	50907	0.0602815	0.0323154	0.560039	-1.78559	0.939851	None	none	none	none	none	none	none	none	209336_E5	E5	216077_E5	E5	1	NA	70.605	73	-0.05	215.88	42.295
186	chr1	21021834	21022055	222	sex-indep (standard)	TAD14_chr1	STAT5_sDHS	sex_indep_static (n=64,584)	not_bound	none	0	0	0	0	WE_79	WE	weak_enhancer	enhancer	chr1	21069304	21069306	-	tram2	TAD14_chr1	47250	1.12368	1.79639	1.65562	1.65562	0.000892354	Male	no_response	none	static	none	none	none	none	209344_E6	E6	216092_E6	E6	1	NA	116.106	140	-0.27	102.543	99.97
187	chr1	21028050	21028282	233	sex-indep (standard)	TAD14_chr1	none	sex_indep_static (n=64,584)	not_bound	none	0	0	0	1	WE_80	WE	weak_enhancer	enhancer	chr1	21069304	21069306	-	tram2	TAD14_chr1	41023	1.12368	1.79639	1.65562	1.65562	0.000892354	Male	no_response	none	none	none	none	none	none	209353_E6	E6	216101_E6	E6	1	NA	59.622	66	-0.15	91.749	65.365
188	chr1	21034876	21035190	315	sex-indep (standard)	TAD14_chr1	STAT5_sDHS	sex_indep_static (n=64,584)	not_bound	none	0	0	0	3	WE_81	WE	weak_enhancer	enhancer	chr1	21069304	21069306	-	tram2	TAD14_chr1	34115	1.12368	1.79639	1.65562	1.65562	0.000892354	Male	no_response	none	none	none	none	none	none	209360_E6	E6	216106_E6	E6	1	NA	58.053	87	-0.58	86.352	84.59
189	chr1	21049167	21050218	1052	sex-indep (robust)	TAD14_chr1	STAT5_sDHS	sex_indep_static (n=64,584)	not_bound	none	0	0	0	1	Enh_41	Enh	enhancer	enhancer	chr1	21069304	21069306	-	tram2	TAD14_chr1	19087	1.12368	1.79639	1.65562	1.65562	0.000892354	Male	no_response	none	static	static	static	static	static	209373_E6	E6	216120_E6	E6	1	NA	1135.96	1361	-0.26	847.329	1030.46
190	chr1	21058583	21058866	284	sex-indep (robust)	TAD14_chr1	none	sex_indep_static (n=64,584)	not_bound	none	0	0	0	0	Enh_42	Enh	enhancer	enhancer	chr1	21069304	21069306	-	tram2	TAD14_chr1	10439	1.12368	1.79639	1.65562	1.65562	0.000892354	Male	no_response	none	none	none	none	none	none	209382_E6	E6	216126_E6	E6	1	NA	83.157	101	-0.28	151.116	138.42
191	chr1	21059881	21060527	647	sex-indep (robust)	TAD14_chr1	STAT5_sDHS	sex_indep_static (n=64,584)	not_bound	none	0	0	0	0	Enh_43	Enh	enhancer	enhancer	chr1	21069304	21069306	-	tram2	TAD14_chr1	8778	1.12368	1.79639	1.65562	1.65562	0.000892354	Male	no_response	none	static	static	none	none	none	209384_E6	E6	216128_E6	E6	1	NA	411.078	375	0.13	291.438	369.12
192	chr1	21068449	21070013	1565	sex-indep (robust)	TAD14_chr1	STAT5_sDHS	sex_indep_static (n=64,584)	not_bound	none	0	0	0	3	Prom_33	Prom	promoter	promoter	chr1	21069304	21069306	-	tram2	TAD14_chr1	0	1.12368	1.79639	1.65562	1.65562	0.000892354	Male	no_response	none	static	static	static	static	static	209396_E7	E7	216135_E7	E7	1	NA	1714.92	1935	-0.17	1786.41	1445.72
193	chr1	21070402	21070895	494	sex-indep (robust)	TAD14_chr1	STAT5_sDHS	sex_indep_static (n=64,584)	STAT5_bound	common	712	367	539.5	2	Insul_14	Insul	insulator	insulator	chr1	21069304	21069306	-	tram2	TAD14_chr1	1097	1.12368	1.79639	1.65562	1.65562	0.000892354	Male	no_response	none	static	static	static	static	static	209401_E6	E6	216139_E6	E6	1	NA	459.717	403	0.19	485.73	695.945
194	chr1	21088433	21088834	402	sex-indep (robust)	TAD14_chr1	STAT5_sDHS	sex_indep_static (n=64,584)	STAT5_bound	common	127	35	81	2	WE_82	WE	weak_enhancer	enhancer	chr1	21069304	21069306	-	tram2	TAD14_chr1	19128	1.12368	1.79639	1.65562	1.65562	0.000892354	Male	no_response	none	static	static	static	static	none	209407_E6	E6	216145_E11	E11	0	NA	202.401	95	1.09	134.925	188.405
195	chr1	21090936	21091753	818	sex-indep (robust)	TAD14_chr1	STAT5_sDHS	sex_indep_static (n=64,584)	STAT5_bound	common	187	60	123.5	0	Insul_15	Insul	insulator	insulator	chr1	21069304	21069306	-	tram2	TAD14_chr1	21631	1.12368	1.79639	1.65562	1.65562	0.000892354	Male	no_response	none	static	static	static	static	static	209412_E6	E6	216148_E6	E6	1	NA	486.39	566	-0.22	512.715	642.115
196	chr1	21092729	21093192	464	Male (standard)	TAD14_chr1	STAT5_hi_dDHS	male_bias_dynamic (n=834)	STAT5_bound	common	215	71	143	2	WE_83	WE	weak_enhancer	enhancer	chr1	21069304	21069306	-	tram2	TAD14_chr1	23424	1.12368	1.79639	1.65562	1.65562	0.000892354	Male	no_response	none	static	none	dDHS_open	dDHS_open	none	209417_E5	E5	216152_E6	E6	0	110	513.063	179	1.52	199.689	207.63
197	chr1	21114931	21115521	591	sex-indep (robust)	TAD14_chr1	STAT5_hi_dDHS	sex_indep_dynamic (n=1532)	STAT5_bound	common	575	938	756.5	2	Insul_16	Insul	insulator	insulator	chr1	21069304	21069306	-	tram2	TAD14_chr1	45626	1.12368	1.79639	1.65562	1.65562	0.000892354	Male	no_response	none	static	static	dDHS_open	dDHS_open	dDHS_open	209424_E6	E6	216157_E6	E6	1	111	742.137	214	1.79	313.026	530.61
198	chr1	21122401	21122853	453	sex-indep (robust)	TAD14_chr1	STAT5_sDHS	sex_indep_static (n=64,584)	STAT5_bound	common	189	214	201.5	0	WE_84	WE	weak_enhancer	enhancer	chr1	21069304	21069306	-	tram2	TAD14_chr1	53096	1.12368	1.79639	1.65562	1.65562	0.000892354	Male	no_response	none	dDHS_close	static	dDHS_open	dDHS_open	dDHS_open	209430_E6	E6	216163_E6	E6	1	NA	1217.54	832	0.55	609.861	1526.46
199	chr1	21151963	21152142	180	sex-indep (standard)	TAD14_chr1	STAT5_sDHS	sex_indep_static (n=64,584)	STAT5_bound	common	164	128	146	2	Insul_17	Insul	insulator	insulator	chr1	21208655	21208657	+	tmem14a	TAD14_chr1	56514	1.48818	1.1198	0.776436	-1.28794	0.355183	None	none	none	static	none	none	none	none	209436_E5	E5	216167_E10	E10	0	NA	117.675	127	-0.11	113.337	92.28
200	chr1	21156229	21156748	520	sex-indep (robust)	TAD14_chr1	STAT5_sDHS	sex_indep_static (n=64,584)	not_bound	none	0	0	0	0	Insul_18	Insul	insulator	insulator	chr1	21208655	21208657	+	tmem14a	TAD14_chr1	51908	1.48818	1.1198	0.776436	-1.28794	0.355183	None	none	none	static	static	static	static	static	209440_E8	E8	216170_E7	E7	0	NA	312.231	346	-0.15	361.599	276.84
201	chr1	21208515	21209167	653	sex-indep (robust)	TAD14_chr1	STAT5_sDHS	sex_indep_static (n=64,584)	not_bound	none	0	0	0	0	WP_15	WP	weak_promoter	promoter	chr1	21208655	21208657	+	tmem14a	TAD14_chr1	0	1.48818	1.1198	0.776436	-1.28794	0.355183	None	none	none	static	dDHS_open	static	static	static	209447_E7	E7	216178_E7	E7	1	NA	712.326	890	-0.32	712.404	484.47
202	chr1	21209489	21209916	428	sex-indep (standard)	TAD14_chr1	none	sex_indep_static (n=64,584)	not_bound	none	0	0	0	0	WP_16	WP	weak_promoter	promoter	chr1	21208655	21208657	+	tmem14a	TAD14_chr1	833	1.48818	1.1198	0.776436	-1.28794	0.355183	None	none	none	none	none	none	none	none	209449_E9	E9	216179_E8	E8	0	NA	39.225	61	-0.64	113.337	88.435
203	chr1	21210905	21211126	222	sex-indep (standard)	TAD14_chr1	none	sex_indep_static (n=64,584)	not_bound	none	0	0	0	0	WE_85	WE	weak_enhancer	enhancer	chr1	21208655	21208657	+	tmem14a	TAD14_chr1	2249	1.48818	1.1198	0.776436	-1.28794	0.355183	None	none	none	none	none	none	none	none	209450_E11	E11	216181_E11	E11	1	NA	10.983	19	-0.79	16.191	38.45
204	chr1	21218144	21218304	161	sex-indep (standard)	TAD14_chr1	none	sex_indep_static (n=64,584)	not_bound	none	0	0	0	0	WE_86	WE	weak_enhancer	enhancer	chr1	21219716	21219718	-	nc_as_c1_102	TAD14_chr1	1413	0.0120188	0.053194	3.14724	3.14724	1	None	none	none	none	none	none	none	none	209456_E6	E6	216188_E9	E9	0	NA	29.811	42	-0.49	118.734	49.985
205	chr1	21218856	21219674	819	sex-indep (robust)	TAD14_chr1	STAT5_sDHS	sex_indep_static (n=64,584)	not_bound	none	0	0	0	0	WE_87	WE	weak_enhancer	enhancer	chr1	21219716	21219718	-	nc_as_c1_102	TAD14_chr1	43	0.0120188	0.053194	3.14724	3.14724	1	None	none	none	static	dDHS_open	static	static	static	209458_E6	E6	216189_E6	E6	1	NA	877.071	1199	-0.45	1138.77	795.915
206	chr1	21221453	21221631	179	sex-indep (standard)	TAD14_chr1	none	sex_indep_static (n=64,584)	not_bound	none	0	0	0	0	WE_88	WE	weak_enhancer	enhancer	chr1	21219716	21219718	-	nc_as_c1_102	TAD14_chr1	1736	0.0120188	0.053194	3.14724	3.14724	1	None	none	none	none	none	none	none	none	209460_E6	E6	216194_E6	E6	1	NA	69.036	82	-0.25	129.528	61.52
207	chr1	21221797	21223110	1314	sex-indep (robust)	TAD14_chr1	STAT5_sDHS	sex_indep_static (n=64,584)	not_bound	none	0	0	0	2	WE_89	WE	weak_enhancer	enhancer	chr1	21219716	21219718	-	nc_as_c1_102	TAD14_chr1	2080	0.0120188	0.053194	3.14724	3.14724	1	None	none	none	dDHS_open	dDHS_open	static	static	static	209462_E6	E6	216196_E6	E6	1	NA	2122.86	2834	-0.42	4360.78	2987.57
208	chr1	21230070	21230960	891	sex-indep (robust)	TAD14_chr1	STAT5_sDHS	sex_indep_static (n=64,584)	STAT5_bound	common	163	132	147.5	3	Prom_34	Prom	promoter	promoter	chr1	21230665	21230667	+	gsta3	TAD14_chr1	0	368.808	301.581	0.84856	-1.17847	0.0990535	None	none	none	static	dDHS_open	dDHS_open	static	static	209468_E6	E6	216204_E6	E6	1	NA	1352.48	1683	-0.32	2579.77	2756.86
209	chr1	21231080	21231709	630	sex-indep (robust)	TAD14_chr1	none	sex_indep_static (n=64,584)	not_bound	none	0	0	0	0	Prom_35	Prom	promoter	promoter	chr1	21230665	21230667	+	gsta3	TAD14_chr1	414	368.808	301.581	0.84856	-1.17847	0.0990535	None	none	none	none	none	none	none	none	209469_E7	E7	216205_E7	E7	1	NA	230.643	262	-0.18	372.393	330.67
210	chr1	21231853	21231987	135	sex-indep (standard)	TAD14_chr1	none	sex_indep_static (n=64,584)	not_bound	none	0	0	0	0	Prom_36	Prom	promoter	promoter	chr1	21230665	21230667	+	gsta3	TAD14_chr1	1187	368.808	301.581	0.84856	-1.17847	0.0990535	None	none	none	none	none	none	none	none	209471_E7	E7	216205_E7	E7	1	NA	53.346	63	-0.24	91.749	73.055
211	chr1	21232861	21233090	230	sex-indep (standard)	TAD14_chr1	none	sex_indep_static (n=64,584)	not_bound	none	0	0	0	0	Prom_37	Prom	promoter	promoter	chr1	21230665	21230667	+	gsta3	TAD14_chr1	2195	368.808	301.581	0.84856	-1.17847	0.0990535	None	none	none	none	none	none	none	none	209472_E8	E8	216207_E7	E7	0	NA	53.346	121	-1.18	145.719	92.28
212	chr1	21233228	21233838	611	sex-indep (standard)	TAD14_chr1	none	sex_indep_static (n=64,584)	not_bound	none	0	0	0	0	Prom_38	Prom	promoter	promoter	chr1	21230665	21230667	+	gsta3	TAD14_chr1	2562	368.808	301.581	0.84856	-1.17847	0.0990535	None	none	none	none	none	none	none	none	209472_E8	E8	216210_E8	E8	1	NA	244.764	382	-0.64	507.318	434.485
213	chr1	21234565	21235158	594	sex-indep (standard)	TAD14_chr1	none	sex_indep_static (n=64,584)	not_bound	none	0	0	0	0	WP_17	WP	weak_promoter	promoter	chr1	21230665	21230667	+	gsta3	TAD14_chr1	3899	368.808	301.581	0.84856	-1.17847	0.0990535	None	none	none	none	none	none	none	none	209475_E7	E7	216211_E7	E7	1	NA	164.745	263	-0.67	383.187	207.63
214	chr1	21236203	21236575	373	sex-indep (robust)	TAD14_chr1	STAT5_sDHS	sex_indep_static (n=64,584)	not_bound	none	0	0	0	0	Enh_44	Enh	enhancer	enhancer	chr1	21230665	21230667	+	gsta3	TAD14_chr1	5537	368.808	301.581	0.84856	-1.17847	0.0990535	None	none	none	static	static	none	none	none	209478_E6	E6	216214_E6	E6	1	NA	240.057	296	-0.3	307.629	365.275
215	chr1	21238039	21238611	573	sex-indep (standard)	TAD14_chr1	none	sex_indep_static (n=64,584)	not_bound	none	0	0	0	2	WE_90	WE	weak_enhancer	enhancer	chr1	21230665	21230667	+	gsta3	TAD14_chr1	7373	368.808	301.581	0.84856	-1.17847	0.0990535	None	none	none	none	none	none	none	none	209481_E9	E9	216217_E9	E9	1	NA	95.709	223	-1.22	291.438	196.095
216	chr1	21239130	21239842	713	sex-indep (standard)	TAD14_chr1	none	sex_indep_static (n=64,584)	not_bound	none	0	0	0	0	Enh_45	Enh	enhancer	enhancer	chr1	21230665	21230667	+	gsta3	TAD14_chr1	8464	368.808	301.581	0.84856	-1.17847	0.0990535	None	none	none	none	none	none	none	none	209482_E6	E6	216218_E6	E6	1	NA	163.176	284	-0.8	534.303	219.165
217	chr1	21242798	21243392	595	sex-indep (robust)	TAD14_chr1	STAT5_hi_dDHS	sex_indep_dynamic (n=1532)	STAT5_bound	common	698	508	603	2	Enh_46	Enh	enhancer	enhancer	chr1	21255022	21255024	-	nc_as_c1_103	TAD14_chr1	11631	0.0227123	0.0360506	1.54934	1.54934	0.661032	None	none	none	static	dDHS_close	dDHS_open	dDHS_open	none	209488_E6	E6	216226_E6	E6	1	110	676.239	361	0.91	296.835	649.805
218	chr1	21243939	21244427	489	sex-indep (standard)	TAD14_chr1	none	sex_indep_static (n=64,584)	not_bound	none	0	0	0	0	WE_91	WE	weak_enhancer	enhancer	chr1	21255022	21255024	-	nc_as_c1_103	TAD14_chr1	10596	0.0227123	0.0360506	1.54934	1.54934	0.661032	None	none	none	none	none	none	none	none	209490_E6	E6	216228_E6	E6	1	NA	64.329	130	-1.01	129.528	169.18
219	chr1	21245921	21246155	235	sex-indep (standard)	TAD14_chr1	none	sex_indep_static (n=64,584)	not_bound	none	0	0	0	0	WE_92	WE	weak_enhancer	enhancer	chr1	21255022	21255024	-	nc_as_c1_103	TAD14_chr1	8868	0.0227123	0.0360506	1.54934	1.54934	0.661032	None	none	none	none	none	none	none	none	209492_E6	E6	216232_E6	E6	1	NA	34.518	45	-0.38	97.146	57.675
220	chr1	21246506	21246785	280	sex-indep (robust)	TAD14_chr1	none	sex_indep_static (n=64,584)	not_bound	none	0	0	0	0	WE_93	WE	weak_enhancer	enhancer	chr1	21255022	21255024	-	nc_as_c1_103	TAD14_chr1	8238	0.0227123	0.0360506	1.54934	1.54934	0.661032	None	none	none	none	none	none	none	none	209494_E6	E6	216234_E6	E6	1	NA	21.966	52	-1.24	75.558	57.675
221	chr1	21247054	21247239	186	sex-indep (standard)	TAD14_chr1	none	sex_indep_static (n=64,584)	not_bound	none	0	0	0	0	WE_94	WE	weak_enhancer	enhancer	chr1	21255022	21255024	-	nc_as_c1_103	TAD14_chr1	7784	0.0227123	0.0360506	1.54934	1.54934	0.661032	None	none	none	none	none	none	none	none	209495_E9	E9	216235_E9	E9	1	NA	23.535	36	-0.61	86.352	42.295
222	chr1	21252423	21252718	296	sex-indep (standard)	TAD14_chr1	none	sex_indep_static (n=64,584)	not_bound	none	0	0	0	0	WE_95	WE	weak_enhancer	enhancer	chr1	21255022	21255024	-	nc_as_c1_103	TAD14_chr1	2305	0.0227123	0.0360506	1.54934	1.54934	0.661032	None	none	none	none	none	none	none	none	209496_E14	E14	216236_E14	E14	1	NA	47.07	86	-0.87	151.116	76.9
223	chr1	21252782	21253075	294	sex-indep (standard)	TAD14_chr1	none	sex_indep_static (n=64,584)	not_bound	none	0	0	0	0	WE_96	WE	weak_enhancer	enhancer	chr1	21255022	21255024	-	nc_as_c1_103	TAD14_chr1	1948	0.0227123	0.0360506	1.54934	1.54934	0.661032	None	none	none	none	none	none	none	none	209496_E14	E14	216236_E14	E14	1	NA	48.639	51	-0.07	124.131	76.9
224	chr1	21254284	21254477	194	sex-indep (standard)	TAD14_chr1	none	sex_indep_static (n=64,584)	not_bound	none	0	0	0	0	WE_97	WE	weak_enhancer	enhancer	chr1	21255022	21255024	-	nc_as_c1_103	TAD14_chr1	546	0.0227123	0.0360506	1.54934	1.54934	0.661032	None	none	none	none	none	none	none	none	209496_E14	E14	216236_E14	E14	1	NA	39.225	70	-0.84	97.146	76.9
225	chr1	21256212	21256386	175	sex-indep (standard)	TAD14_chr1	none	sex_indep_static (n=64,584)	not_bound	none	0	0	0	0	Insul_19	Insul	insulator	insulator	chr1	21255022	21255024	-	nc_as_c1_103	TAD14_chr1	1189	0.0227123	0.0360506	1.54934	1.54934	0.661032	None	none	none	none	none	none	none	none	209498_E10	E10	216238_E5	E5	0	NA	28.242	64	-1.18	113.337	57.675
226	chr1	21261450	21261828	379	sex-indep (standard)	TAD14_chr1	STAT5_sDHS	sex_indep_static (n=64,584)	not_bound	none	0	0	0	0	Insul_20	Insul	insulator	insulator	chr1	21255022	21255024	-	nc_as_c1_103	TAD14_chr1	6427	0.0227123	0.0360506	1.54934	1.54934	0.661032	None	none	none	static	none	static	static	static	209500_E5	E5	216243_E5	E5	1	NA	144.348	173	-0.26	237.468	165.335
227	chr1	21262235	21262400	166	sex-indep (standard)	TAD14_chr1	none	sex_indep_static (n=64,584)	not_bound	none	0	0	0	0	Insul_21	Insul	insulator	insulator	chr1	21255022	21255024	-	nc_as_c1_103	TAD14_chr1	7212	0.0227123	0.0360506	1.54934	1.54934	0.661032	None	none	none	none	none	none	none	none	209503_E6	E6	216244_E12	E12	0	NA	43.932	40	0.14	43.176	38.45
228	chr1	21294301	21295099	799	sex-indep (robust)	TAD14_chr1	STAT5_sDHS	sex_indep_static (n=64,584)	not_bound	none	0	0	0	0	WE_98	WE	weak_enhancer	enhancer	chr1	21288391	21288393	-	gm4956	TAD14_chr1	5909	0.190702	1.11193	5.77579	5.77579	2.10222e-06	Male	no_response	none	static	static	static	static	static	209510_E6	E6	216248_E10	E10	0	NA	608.772	823	-0.43	820.344	315.29
229	chr1	21310378	21310647	270	sex-indep (robust)	TAD14_chr1	STAT5_sDHS	sex_indep_static (n=64,584)	not_bound	none	0	0	0	0	WE_99	WE	weak_enhancer	enhancer	chr1	21288391	21288393	-	gm4956	TAD14_chr1	21986	0.190702	1.11193	5.77579	5.77579	2.10222e-06	Male	no_response	none	dDHS_close	static	dDHS_open	static	static	209524_E6	E6	216259_E10	E10	0	NA	931.986	768	0.28	426.363	511.385
230	chr1	21314112	21314758	647	sex-indep (robust)	TAD14_chr1	STAT5_sDHS	sex_indep_static (n=64,584)	STAT5_bound	male_enriched	133	17	75	0	Enh_47	Enh	enhancer	enhancer	chr1	21339757	21339759	+	khdc1a	TAD14_chr1	25000	0	0.0145523	9.11725	9.11725	0.861185	None	none	none	dDHS_close	static	static	static	dDHS_open	209532_E6	E6	216261_E6	E6	1	NA	1366.6	1136	0.27	674.625	722.86
231	chr1	21316764	21317254	491	sex-indep (robust)	TAD14_chr1	STAT5_sDHS	sex_indep_static (n=64,584)	STAT5_bound	common	139	55	97	0	WE_100	WE	weak_enhancer	enhancer	chr1	21339757	21339759	+	khdc1a	TAD14_chr1	22504	0	0.0145523	9.11725	9.11725	0.861185	None	none	none	dDHS_close	static	static	static	static	209534_E6	E6	216265_E6	E6	1	NA	1352.48	1115	0.28	760.977	603.665
232	chr1	21318482	21318921	440	sex-indep (robust)	TAD14_chr1	STAT5_sDHS	sex_indep_static (n=64,584)	not_bound	none	0	0	0	0	WE_101	WE	weak_enhancer	enhancer	chr1	21339757	21339759	+	khdc1a	TAD14_chr1	20837	0	0.0145523	9.11725	9.11725	0.861185	None	none	none	none	none	none	none	none	209536_E6	E6	216268_E6	E6	1	NA	357.732	374	-0.06	253.659	146.11
233	chr1	21323775	21324106	332	Male (standard)	TAD14_chr1	STAT5_sDHS	male_bias_static (n=1895)	not_bound	none	0	0	0	2	WE_102	WE	weak_enhancer	enhancer	chr1	21339757	21339759	+	khdc1a	TAD14_chr1	15652	0	0.0145523	9.11725	9.11725	0.861185	None	none	none	static	none	none	none	none	209540_E6	E6	216274_E2	E2	0	NA	122.382	28	2.13	48.573	7.69
234	chr1	21334408	21334676	269	sex-indep (standard)	TAD14_chr1	STAT5_sDHS	sex_indep_static (n=64,584)	not_bound	none	0	0	0	0	Insul_22	Insul	insulator	insulator	chr1	21339757	21339759	+	khdc1a	TAD14_chr1	5082	0	0.0145523	9.11725	9.11725	0.861185	None	none	none	static	none	none	none	none	209543_E10	E10	216274_E2	E2	0	NA	139.641	107	0.38	140.322	80.745
235	chr1	21820131	21820288	158	sex-indep (standard)	TAD15_chr1	STAT5_sDHS	sex_indep_static (n=64,584)	not_bound	none	0	0	0	2	WE_103	WE	weak_enhancer	enhancer	chr1	21952021	21952023	-	kcnq5	TAD15_chr1	131734	0.0207159	0.00842039	0.486034	-2.05747	0.5045	None	none	none	static	static	static	static	static	209570_E8	E8	216307_E6	E6	0	NA	103.554	67	0.63	59.367	84.59
236	chr1	22106538	22107596	1059	sex-indep (robust)	TAD15_chr1	STAT5_sDHS	sex_indep_static (n=64,584)	STAT5_bound	common	519	925	722	2	Enh_48	Enh	enhancer	enhancer	chr1	21952021	21952023	-	kcnq5	TAD15_chr1	154516	0.0207159	0.00842039	0.486034	-2.05747	0.5045	None	none	none	dDHS_close	dDHS_close	dDHS_open	static	dDHS_open	209592_E6	E6	216323_E6	E6	1	NA	1548.6	865	0.84	566.685	1910.96
237	chr1	22305632	22305986	355	sex-indep (standard)	TAD15_chr1	STAT5_sDHS	sex_indep_static (n=64,584)	not_bound	none	0	0	0	2	WE_104	WE	weak_enhancer	enhancer	chr1	21952021	21952023	-	kcnq5	TAD15_chr1	353610	0.0207159	0.00842039	0.486034	-2.05747	0.5045	None	none	none	none	none	none	none	none	209606_E9	E9	216348_E7	E7	0	NA	97.278	110	-0.18	156.513	153.8
238	chr1	22545192	22545350	159	sex-indep (standard)	TAD15_chr1	none	sex_indep_static (n=64,584)	not_bound	none	0	0	0	0	WE_105	WE	weak_enhancer	enhancer	chr1	22812561	22812563	-	rims1	TAD15_chr1	267212	0.00214414	0	0.275878	-3.62479	1	None	none	none	none	none	none	none	none	209625_E12	E12	216361_E12	E12	1	NA	29.811	15	0.99	43.176	26.915
239	chr1	22601751	22602035	285	sex-indep (standard)	TAD15_chr1	STAT5_sDHS	sex_indep_static (n=64,584)	not_bound	none	0	0	0	0	WE_106	WE	weak_enhancer	enhancer	chr1	22812561	22812563	-	rims1	TAD15_chr1	210527	0.00214414	0	0.275878	-3.62479	1	None	none	none	static	none	none	none	none	209630_E11	E11	216367_E12	E12	0	NA	109.83	110	0	129.528	76.9
240	chr1	22627701	22628044	344	sex-indep (robust)	TAD15_chr1	STAT5_sDHS	sex_indep_static (n=64,584)	not_bound	none	0	0	0	1	WE_107	WE	weak_enhancer	enhancer	chr1	22812561	22812563	-	rims1	TAD15_chr1	184518	0.00214414	0	0.275878	-3.62479	1	None	none	none	static	static	static	static	static	209636_E11	E11	216370_E6	E6	0	NA	166.314	241	-0.54	253.659	392.19
241	chr1	22640824	22640965	142	sex-indep (standard)	TAD15_chr1	STAT5_sDHS	sex_indep_static (n=64,584)	not_bound	none	0	0	0	0	WE_108	WE	weak_enhancer	enhancer	chr1	22812561	22812563	-	rims1	TAD15_chr1	171597	0.00214414	0	0.275878	-3.62479	1	None	none	none	static	none	none	none	none	209641_E12	E12	216374_E11	E11	0	NA	76.881	74	0.06	70.161	46.14
242	chr1	22652210	22652414	205	sex-indep (standard)	TAD15_chr1	STAT5_sDHS	sex_indep_static (n=64,584)	not_bound	none	0	0	0	0	WE_109	WE	weak_enhancer	enhancer	chr1	22812561	22812563	-	rims1	TAD15_chr1	160148	0.00214414	0	0.275878	-3.62479	1	None	none	none	none	none	none	none	none	209643_E12	E12	216378_E12	E12	1	NA	45.501	58	-0.35	113.337	76.9
243	chr1	23003482	23003908	427	sex-indep (robust)	TAD15_chr1	STAT5_sDHS	sex_indep_static (n=64,584)	not_bound	none	0	0	0	1	WE_110	WE	weak_enhancer	enhancer	chr1	23109090	23109092	-	4933415f23rik	TAD15_chr1	105183	0	0	1	1	1	None	none	none	static	static	static	static	static	209663_E6	E6	216401_E12	E12	0	NA	524.046	421	0.32	248.262	434.485
244	chr1	23153388	23153694	307	sex-indep (robust)	TAD16_chr1	STAT5_sDHS	sex_indep_static (n=64,584)	not_bound	none	0	0	0	2	WE_111	WE	weak_enhancer	enhancer	chr1	23263103	23263105	+	nc_inter_c1_108	TAD16_chr1	109410	1.04512	1.4149	1.33348	1.33348	0.583578	None	none	none	static	static	none	none	static	209668_E6	E6	216416_E9	E9	0	NA	254.178	383	-0.59	161.91	253.77
245	chr1	23169710	23169936	227	sex-indep (standard)	TAD16_chr1	STAT5_sDHS	sex_indep_static (n=64,584)	not_bound	none	0	0	0	0	WE_112	WE	weak_enhancer	enhancer	chr1	23263103	23263105	+	nc_inter_c1_108	TAD16_chr1	93168	1.04512	1.4149	1.33348	1.33348	0.583578	None	none	none	none	none	none	none	none	209678_E6	E6	216421_E6	E6	1	NA	130.227	184	-0.5	124.131	134.575
246	chr1	23170261	23171144	884	sex-indep (robust)	TAD16_chr1	STAT5_sDHS	sex_indep_static (n=64,584)	STAT5_bound	common	211	105	158	0	Enh_49	Enh	enhancer	enhancer	chr1	23263103	23263105	+	nc_inter_c1_108	TAD16_chr1	91960	1.04512	1.4149	1.33348	1.33348	0.583578	None	none	none	static	dDHS_close	static	static	dDHS_open	209680_E6	E6	216423_E6	E6	1	NA	1987.92	2297	-0.21	1511.16	2914.51
247	chr1	23189476	23189670	195	sex-indep (robust)	TAD16_chr1	STAT5_sDHS	sex_indep_static (n=64,584)	not_bound	none	0	0	0	0	WE_113	WE	weak_enhancer	enhancer	chr1	23263103	23263105	+	nc_inter_c1_108	TAD16_chr1	73434	1.04512	1.4149	1.33348	1.33348	0.583578	None	none	none	static	static	none	none	static	209693_E10	E10	216433_E6	E6	0	NA	78.45	129	-0.72	70.161	242.235
248	chr1	23194340	23195070	731	sex-indep (robust)	TAD16_chr1	STAT5_sDHS	sex_indep_static (n=64,584)	not_bound	none	0	0	0	0	WP_18	WP	weak_promoter	promoter	chr1	23263103	23263105	+	nc_inter_c1_108	TAD16_chr1	68034	1.04512	1.4149	1.33348	1.33348	0.583578	None	none	none	static	static	static	static	static	209698_E7	E7	216442_E7	E7	1	NA	1263.05	1667	-0.4	993.048	1445.72
249	chr1	23195218	23195387	170	sex-indep (standard)	TAD16_chr1	STAT5_sDHS	sex_indep_static (n=64,584)	not_bound	none	0	0	0	0	WP_19	WP	weak_promoter	promoter	chr1	23263103	23263105	+	nc_inter_c1_108	TAD16_chr1	67717	1.04512	1.4149	1.33348	1.33348	0.583578	None	none	none	static	none	none	static	none	209699_E8	E8	216443_E8	E8	1	NA	73.743	123	-0.74	124.131	88.435
250	chr1	23244986	23245424	439	sex-indep (standard)	TAD16_chr1	STAT5_sDHS	sex_indep_static (n=64,584)	STAT5_bound	male_enriched	127	29	78	3	Enh_50	Enh	enhancer	enhancer	chr1	23263103	23263105	+	nc_inter_c1_108	TAD16_chr1	17680	1.04512	1.4149	1.33348	1.33348	0.583578	None	none	none	static	none	none	none	none	209710_E6	E6	216452_E11	E11	0	NA	203.97	181	0.17	140.322	138.42
251	chr1	23260912	23261491	580	sex-indep (robust)	TAD16_chr1	STAT5_sDHS	sex_indep_static (n=64,584)	not_bound	none	0	0	0	2	Enh_51	Enh	enhancer	enhancer	chr1	23263103	23263105	+	nc_inter_c1_108	TAD16_chr1	1613	1.04512	1.4149	1.33348	1.33348	0.583578	None	none	none	static	dDHS_open	static	static	static	209717_E6	E6	216456_E6	E6	1	NA	547.581	517	0.08	1057.81	519.075
252	chr1	23262658	23264219	1562	sex-indep (robust)	TAD16_chr1	STAT5_sDHS	sex_indep_static (n=64,584)	not_bound	none	0	0	0	2	WP_20	WP	weak_promoter	promoter	chr1	23263103	23263105	+	nc_inter_c1_108	TAD16_chr1	0	1.04512	1.4149	1.33348	1.33348	0.583578	None	none	none	static	dDHS_open	static	static	static	209721_E7	E7	216460_E7	E7	1	NA	3294.9	3433	-0.06	4301.41	2637.67
253	chr1	23272451	23272689	239	sex-indep (robust)	TAD16_chr1	STAT5_sDHS	sex_indep_static (n=64,584)	not_bound	none	0	0	0	0	Enh_52	Enh	enhancer	enhancer	chr1	23279107	23279109	+	mir30a	TAD16_chr1	6419	0	0	1	1	1	None	none	none	static	static	static	static	static	209732_E6	E6	216469_E6	E6	1	NA	144.348	155	-0.1	253.659	157.645
254	chr1	23286742	23287035	294	sex-indep (robust)	TAD16_chr1	STAT5_sDHS	sex_indep_static (n=64,584)	not_bound	none	0	0	0	0	WE_114	WE	weak_enhancer	enhancer	chr1	23279107	23279109	+	mir30a	TAD16_chr1	7634	0	0	1	1	1	None	none	none	none	none	none	none	none	209736_E14	E14	216482_E14	E14	1	NA	120.813	123	-0.03	80.955	161.49
255	chr1	23293672	23293793	122	sex-indep (standard)	TAD16_chr1	STAT5_sDHS	sex_indep_static (n=64,584)	not_bound	none	0	0	0	0	Insul_23	Insul	insulator	insulator	chr1	23298539	23298541	+	mir30c-2	TAD16_chr1	4747	0.236236	0.709783	3.14986	3.14986	0.747128	None	none	none	static	none	none	none	none	209742_E14	E14	216486_E13	E13	0	NA	58.053	56	0.05	59.367	34.605
256	chr1	23321642	23321810	169	Male (less stringent)	TAD16_chr1	STAT5_hi_dDHS	male_bias_dynamic (n=834)	not_bound	none	0	0	0	0	WE_115	WE	weak_enhancer	enhancer	chr1	23298539	23298541	+	mir30c-2	TAD16_chr1	23102	0.236236	0.709783	3.14986	3.14986	0.747128	None	none	none	dDHS_close	none	none	none	none	209748_E11	E11	216495_E13	E13	0	1000	203.97	83	1.3	43.176	49.985
257	chr1	23327479	23328729	1251	Male (standard)	TAD17_chr1	STAT5_sDHS	male_bias_static (n=1895)	STAT5_bound	common	590	427	508.5	4	WE_116	WE	weak_enhancer	enhancer	chr1	23390012	23390014	-	ogfrl1	TAD17_chr1	61284	1.86468	2.0254	1.12592	1.12592	0.659637	sex_indep	none	none	dDHS_close	static	static	none	none	209751_E6	E6	216501_E6	E6	1	NA	1071.63	507	1.08	458.745	815.14
258	chr1	23389440	23390803	1364	sex-indep (robust)	TAD17_chr1	STAT5_sDHS	sex_indep_static (n=64,584)	not_bound	none	0	0	0	1	Insul_24	Insul	insulator	insulator	chr1	23390012	23390014	-	ogfrl1	TAD17_chr1	0	1.86468	2.0254	1.12592	1.12592	0.659637	sex_indep	none	none	static	static	static	static	static	209767_E7	E7	216514_E7	E7	1	NA	1700.8	1767	-0.06	1667.67	1680.27
259	chr1	23418424	23418774	351	sex-indep (standard)	TAD17_chr1	STAT5_sDHS	sex_indep_static (n=64,584)	not_bound	none	0	0	0	0	WE_117	WE	weak_enhancer	enhancer	chr1	23390012	23390014	-	ogfrl1	TAD17_chr1	28411	1.86468	2.0254	1.12592	1.12592	0.659637	sex_indep	none	none	static	static	none	none	none	209775_E12	E12	216526_E12	E12	1	NA	119.244	99	0.27	107.94	184.56
260	chr1	23487714	23488167	454	Male (standard)	TAD17_chr1	STAT5_hi_dDHS	male_bias_dynamic (n=834)	STAT5_bound	common	370	159	264.5	0	WE_118	WE	weak_enhancer	enhancer	chr1	23390012	23390014	-	ogfrl1	TAD17_chr1	97701	1.86468	2.0254	1.12592	1.12592	0.659637	sex_indep	none	none	dDHS_close	static	dDHS_open	dDHS_open	none	209780_E6	E6	216533_E6	E6	1	1110	1352.48	395	1.78	259.056	595.975
261	chr1	23491439	23491893	455	Male (standard)	TAD17_chr1	STAT5_hi_dDHS	male_bias_dynamic (n=834)	STAT5_bound	common	777	403	590	0	WE_119	WE	weak_enhancer	enhancer	chr1	23390012	23390014	-	ogfrl1	TAD17_chr1	101426	1.86468	2.0254	1.12592	1.12592	0.659637	sex_indep	none	none	dDHS_close	dDHS_close	dDHS_open	dDHS_open	static	209784_E6	E6	216538_E6	E6	1	1110	2767.72	934	1.57	399.378	1099.67
262	chr1	23769678	23770093	416	sex-indep (robust)	TAD18_chr1	STAT5_sDHS	sex_indep_static (n=64,584)	not_bound	none	0	0	0	0	Enh_53	Enh	enhancer	enhancer	chr1	23768764	23768766	+	b3gat2	TAD18_chr1	913	0.0609226	0.049616	0.894133	-1.1184	1	None	none	none	none	none	none	none	none	209818_E12	E12	216572_E12	E12	1	NA	78.45	104	-0.41	145.719	42.295
263	chr1	23928483	23929489	1007	sex-indep (robust)	TAD19_chr1	STAT5_sDHS	sex_indep_static (n=64,584)	not_bound	none	0	0	0	1	WP_21	WP	weak_promoter	promoter	chr1	23929218	23929220	-	smap1	TAD19_chr1	0	1.963	2.30692	1.21401	1.21401	0.203069	None	none	none	static	dDHS_open	static	static	static	209847_E7	E7	216609_E7	E7	1	NA	1059.08	1201	-0.18	1214.33	699.79
264	chr1	24012004	24012798	795	sex-indep (robust)	TAD19_chr1	STAT5_sDHS	sex_indep_static (n=64,584)	not_bound	none	0	0	0	2	Prom_39	Prom	promoter	promoter	chr1	24012477	24012479	-	1110058l19rik	TAD19_chr1	0	9.99178	11.0694	1.14504	1.14504	0.636541	sex_indep	none	none	static	static	static	dDHS_open	static	209865_E7	E7	216627_E7	E7	1	NA	877.071	1002	-0.19	755.58	726.705
265	chr1	24106418	24108075	1658	sex-indep (robust)	TAD19_chr1	STAT5_sDHS	sex_indep_static (n=64,584)	not_bound	none	0	0	0	0	Prom_40	Prom	promoter	promoter	chr1	24107178	24107180	-	fam135a	TAD19_chr1	0	2.79775	3.28422	1.21925	1.21925	0.0553446	None	none	none	static	static	static	static	static	209889_E7	E7	216647_E7	E7	1	NA	1851.42	2098	-0.18	1705.45	1334.21
266	chr1	24114225	24115555	1331	sex-indep (robust)	TAD19_chr1	STAT5_hi_dDHS	sex_indep_dynamic (n=1532)	STAT5_bound	common	736	366	551	2	WP_22	WP	weak_promoter	promoter	chr1	24114905	24114907	+	nc_inter_c1_115	TAD19_chr1	0	0.129799	0.33191	2.46226	2.46226	0.0488462	Male	class_I	IB	dDHS_close	static	dDHS_open	dDHS_open	static	209899_E7	E7	216655_E7	E7	1	1110	2609.25	1652	0.66	1289.88	1857.13
268	chr1	24685030	24686280	1251	sex-indep (robust)	TAD20_chr1	STAT5_sDHS	sex_indep_static (n=64,584)	not_bound	none	0	0	0	0	Prom_41	Prom	promoter	promoter	chr1	24685382	24685384	+	lmbrd1	TAD20_chr1	0	6.55415	6.44712	1.02108	1.02108	1	sex_indep	none	none	static	dDHS_open	static	static	static	209954_E7	E7	216709_E7	E7	1	NA	2402.14	2595	-0.11	3691.55	2153.2
269	chr1	24740882	24741178	297	sex-indep (standard)	TAD20_chr1	none	sex_indep_static (n=64,584)	not_bound	none	0	0	0	0	WE_120	WE	weak_enhancer	enhancer	chr1	24685382	24685384	+	lmbrd1	TAD20_chr1	55499	6.55415	6.44712	1.02108	1.02108	1	sex_indep	none	none	static	none	static	static	static	209963_E8	E8	216716_E8	E8	1	NA	62.76	78	-0.31	226.674	73.055
270	chr1	24756184	24756522	339	sex-indep (robust)	TAD20_chr1	STAT5_sDHS	sex_indep_static (n=64,584)	not_bound	none	0	0	0	1	Enh_54	Enh	enhancer	enhancer	chr1	24685382	24685384	+	lmbrd1	TAD20_chr1	70801	6.55415	6.44712	1.02108	1.02108	1	sex_indep	none	none	none	none	none	none	none	209979_E6	E6	216731_E8	E8	0	NA	75.312	111	-0.56	178.101	103.815
271	chr1	24757161	24757548	388	sex-indep (robust)	TAD20_chr1	STAT5_sDHS	sex_indep_static (n=64,584)	not_bound	none	0	0	0	0	Enh_55	Enh	enhancer	enhancer	chr1	24685382	24685384	+	lmbrd1	TAD20_chr1	71778	6.55415	6.44712	1.02108	1.02108	1	sex_indep	none	none	static	static	static	static	static	209981_E6	E6	216733_E6	E6	1	NA	298.11	376	-0.33	313.026	465.245
272	chr1	24800165	24800395	231	sex-indep (standard)	TAD20_chr1	STAT5_sDHS	sex_indep_static (n=64,584)	not_bound	none	0	0	0	0	WE_121	WE	weak_enhancer	enhancer	chr1	24685382	24685384	+	lmbrd1	TAD20_chr1	114782	6.55415	6.44712	1.02108	1.02108	1	sex_indep	none	none	static	static	none	none	none	209999_E11	E11	216744_E9	E9	0	NA	136.503	124	0.14	118.734	96.125
273	chr1	27939132	27939258	127	sex-indep (standard)	TAD20_chr1	none	sex_indep_static (n=64,584)	not_bound	none	0	0	0	0	WE_122	WE	weak_enhancer	enhancer	chr1	27940847	27940849	+	nc_inter_c1_119	TAD20_chr1	1590	5.74108	7.67177	1.31302	1.31302	0.210507	None	none	none	none	none	none	none	none	210096_E10	E10	216880_E2	E2	0	NA	9.414	10	-0.09	21.588	38.45
274	chr1	27940485	27941017	533	sex-indep (robust)	TAD20_chr1	STAT5_sDHS	sex_indep_static (n=64,584)	not_bound	none	0	0	0	0	Prom_42	Prom	promoter	promoter	chr1	27940847	27940849	+	nc_inter_c1_119	TAD20_chr1	0	5.74108	7.67177	1.31302	1.31302	0.210507	None	none	none	static	static	static	static	static	210099_E7	E7	216883_E6	E6	0	NA	1187.73	1250	-0.07	787.962	1165.04
275	chr1	27941700	27941932	233	sex-indep (standard)	TAD20_chr1	STAT5_sDHS	sex_indep_static (n=64,584)	STAT5_bound	female_enriched	69	155	112	2	Prom_43	Prom	promoter	promoter	chr1	27940847	27940849	+	nc_inter_c1_119	TAD20_chr1	852	5.74108	7.67177	1.31302	1.31302	0.210507	None	none	none	static	static	static	none	static	210100_E8	E8	216884_E8	E8	1	NA	225.936	240	-0.09	172.704	230.7
276	chr1	30841083	30841339	257	sex-indep (standard)	TAD21_chr1	STAT5_sDHS	sex_indep_static (n=64,584)	not_bound	none	0	0	0	0	WE_123	WE	weak_enhancer	enhancer	chr1	30920099	30920101	-	phf3	TAD21_chr1	78761	3.45869	3.64042	1.09218	1.09218	0.751688	sex_indep	none	none	none	none	none	none	none	210176_E6	E6	216970_E9	E9	0	NA	67.467	73	-0.11	107.94	65.365
277	chr1	30858513	30859126	614	sex-indep (standard)	TAD21_chr1	STAT5_sDHS	sex_indep_static (n=64,584)	not_bound	none	0	0	0	0	Enh_56	Enh	enhancer	enhancer	chr1	30920099	30920101	-	phf3	TAD21_chr1	60974	3.45869	3.64042	1.09218	1.09218	0.751688	sex_indep	none	none	static	static	static	static	static	210181_E6	E6	216975_E6	E6	1	NA	304.386	391	-0.36	437.157	692.1
278	chr1	30867489	30867765	277	sex-indep (standard)	TAD21_chr1	STAT5_sDHS	sex_indep_static (n=64,584)	not_bound	none	0	0	0	2	Enh_57	Enh	enhancer	enhancer	chr1	30920099	30920101	-	phf3	TAD21_chr1	52335	3.45869	3.64042	1.09218	1.09218	0.751688	sex_indep	none	none	static	static	static	static	static	210186_E6	E6	216980_E6	E6	1	NA	208.677	215	-0.04	178.101	461.4
279	chr1	30929659	30931230	1572	sex-indep (robust)	TAD21_chr1	STAT5_sDHS	sex_indep_static (n=64,584)	not_bound	none	0	0	0	1	Prom_44	Prom	promoter	promoter	chr1	30920099	30920101	-	phf3	TAD21_chr1	9559	3.45869	3.64042	1.09218	1.09218	0.751688	sex_indep	none	none	static	dDHS_open	static	static	static	210216_E7	E7	217009_E7	E7	1	NA	1777.68	2013	-0.18	2142.61	1176.57
280	chr1	30931407	30931672	266	sex-indep (robust)	TAD21_chr1	STAT5_sDHS	sex_indep_static (n=64,584)	not_bound	none	0	0	0	0	Prom_45	Prom	promoter	promoter	chr1	30920099	30920101	-	phf3	TAD21_chr1	11307	3.45869	3.64042	1.09218	1.09218	0.751688	sex_indep	none	none	static	static	none	none	none	210218_E7	E7	217011_E7	E7	1	NA	149.055	193	-0.37	259.056	249.925
281	chr1	30932931	30933327	397	sex-indep (robust)	TAD21_chr1	none	sex_indep_static (n=64,584)	not_bound	none	0	0	0	1	WE_124	WE	weak_enhancer	enhancer	chr1	30920099	30920101	-	phf3	TAD21_chr1	12831	3.45869	3.64042	1.09218	1.09218	0.751688	sex_indep	none	none	none	none	none	none	none	210222_E5	E5	217014_E11	E11	0	NA	98.847	129	-0.38	86.352	192.25
282	chr1	30994294	30994845	552	sex-indep (robust)	TAD21_chr1	STAT5_sDHS	sex_indep_static (n=64,584)	not_bound	none	0	0	0	2	WE_125	WE	weak_enhancer	enhancer	chr1	31006553	31006555	-	gm13363	TAD21_chr1	11709	39.7775	30.3699	0.792537	-1.26177	0.178737	None	none	none	static	dDHS_open	dDHS_open	dDHS_open	static	210237_E6	E6	217025_E6	E6	1	NA	604.065	399	0.6	944.475	542.145
283	chr1	31002073	31002311	239	sex-indep (standard)	TAD21_chr1	none	sex_indep_static (n=64,584)	not_bound	none	0	0	0	0	WE_126	WE	weak_enhancer	enhancer	chr1	31006553	31006555	-	gm13363	TAD21_chr1	4243	39.7775	30.3699	0.792537	-1.26177	0.178737	None	none	none	none	none	none	none	none	210243_E9	E9	217032_E11	E11	0	NA	56.484	61	-0.11	156.513	92.28
284	chr1	31005323	31005495	173	sex-indep (standard)	TAD21_chr1	none	sex_indep_static (n=64,584)	not_bound	none	0	0	0	0	Prom_46	Prom	promoter	promoter	chr1	31006553	31006555	-	gm13363	TAD21_chr1	1059	39.7775	30.3699	0.792537	-1.26177	0.178737	None	none	none	none	none	none	none	none	210246_E7	E7	217036_E8	E8	0	NA	112.968	138	-0.29	151.116	119.195
285	chr1	31005794	31007662	1869	sex-indep (robust)	TAD21_chr1	STAT5_sDHS	sex_indep_static (n=64,584)	STAT5_bound	common	357	201	279	2	Prom_47	Prom	promoter	promoter	chr1	31006553	31006555	-	gm13363	TAD21_chr1	0	39.7775	30.3699	0.792537	-1.26177	0.178737	None	none	none	static	dDHS_open	static	static	static	210248_E7	E7	217037_E7	E7	1	NA	6924	6929	0	11635.9	6928.69
286	chr1	31048742	31049203	462	Male (less stringent)	TAD21_chr1	STAT5_sDHS	male_bias_static (n=1895)	not_bound	none	0	0	0	0	WE_127	WE	weak_enhancer	enhancer	chr1	31006598	31006600	-	ptp4a1	TAD21_chr1	42143	29.0194	22.2242	0.794952	-1.25794	0.181203	None	none	none	dDHS_close	none	none	none	none	210255_E6	E6	217050_E13	E13	0	NA	538.167	371	0.54	107.94	38.45
287	chr1	31051054	31051274	221	Male (standard)	TAD21_chr1	STAT5_sDHS	male_bias_static (n=1895)	not_bound	none	0	0	0	0	WE_128	WE	weak_enhancer	enhancer	chr1	31006598	31006600	-	ptp4a1	TAD21_chr1	44455	29.0194	22.2242	0.794952	-1.25794	0.181203	None	none	none	static	none	none	none	none	210260_E5	E5	217050_E13	E13	0	NA	164.745	67	1.3	59.367	26.915
288	chr1	31072033	31072451	419	sex-indep (robust)	TAD21_chr1	none	sex_indep_static (n=64,584)	STAT5_bound	common	849	360	604.5	0	Enh_58	Enh	enhancer	enhancer	chr1	31006598	31006600	-	ptp4a1	TAD21_chr1	65434	29.0194	22.2242	0.794952	-1.25794	0.181203	None	none	none	none	none	none	none	none	210265_E6	E6	217058_E6	E6	1	NA	390.681	335	0.22	496.524	326.825
289	chr1	31072654	31073353	700	sex-indep (robust)	TAD21_chr1	STAT5_sDHS	sex_indep_static (n=64,584)	STAT5_bound	common	849	360	604.5	0	Enh_59	Enh	enhancer	enhancer	chr1	31006598	31006600	-	ptp4a1	TAD21_chr1	66055	29.0194	22.2242	0.794952	-1.25794	0.181203	None	none	none	static	static	dDHS_open	static	static	210267_E6	E6	217060_E6	E6	1	NA	1194.01	855	0.48	1117.18	1530.31
290	chr1	31074144	31074738	595	sex-indep (robust)	TAD21_chr1	STAT5_sDHS	sex_indep_static (n=64,584)	STAT5_bound	common	191	75	133	1	Enh_60	Enh	enhancer	enhancer	chr1	31006598	31006600	-	ptp4a1	TAD21_chr1	67545	29.0194	22.2242	0.794952	-1.25794	0.181203	None	none	none	dDHS_close	static	static	static	static	210269_E6	E6	217062_E6	E6	1	NA	1558.02	1460	0.09	928.284	1441.88
291	chr1	31076037	31076875	839	sex-indep (robust)	TAD21_chr1	STAT5_hi_dDHS	sex_indep_dynamic (n=1532)	STAT5_bound	common	392	262	327	2	Enh_61	Enh	enhancer	enhancer	chr1	31006598	31006600	-	ptp4a1	TAD21_chr1	69438	29.0194	22.2242	0.794952	-1.25794	0.181203	None	none	none	static	dDHS_open	static	static	static	210274_E7	E7	217066_E7	E7	1	0	2661.02	1669	0.67	4036.96	2710.72
292	chr1	31090628	31091252	625	sex-indep (robust)	TAD21_chr1	STAT5_hi_dDHS	sex_indep_dynamic (n=1532)	STAT5_bound	common	582	433	507.5	1	Enh_62	Enh	enhancer	enhancer	chr1	31154913	31154915	-	nc_inter_c1_126	TAD21_chr1	63662	0.173695	0.181976	1.02833	1.02833	1	None	none	none	dDHS_close	static	dDHS_open	dDHS_open	static	210280_E6	E6	217074_E6	E6	1	1110	2963.84	1011	1.55	1640.69	1338.06
293	chr1	31092803	31093166	364	sex-indep (standard)	TAD21_chr1	none	sex_indep_static (n=64,584)	STAT5_bound	common	139	98	118.5	2	Enh_63	Enh	enhancer	enhancer	chr1	31154913	31154915	-	nc_inter_c1_126	TAD21_chr1	61748	0.173695	0.181976	1.02833	1.02833	1	None	none	none	none	none	dDHS_open	dDHS_open	none	210282_E6	E6	217076_E6	E6	1	NA	274.575	108	1.35	242.865	149.955
294	chr1	31107208	31107480	273	sex-indep (robust)	TAD21_chr1	none	sex_indep_static (n=64,584)	not_bound	none	0	0	0	0	WE_129	WE	weak_enhancer	enhancer	chr1	31154913	31154915	-	nc_inter_c1_126	TAD21_chr1	47434	0.173695	0.181976	1.02833	1.02833	1	None	none	none	static	dDHS_open	static	static	static	210293_E6	E6	217088_E6	E6	1	NA	80.019	73	0.13	199.689	119.195
295	chr1	31129432	31130358	927	sex-indep (robust)	TAD21_chr1	STAT5_sDHS	sex_indep_static (n=64,584)	STAT5_bound	common	423	545	484	2	Enh_64	Enh	enhancer	enhancer	chr1	31154913	31154915	-	nc_inter_c1_126	TAD21_chr1	24556	0.173695	0.181976	1.02833	1.02833	1	None	none	none	static	static	static	dDHS_open	static	210302_E6	E6	217095_E6	E6	1	NA	2027.15	1389	0.55	2304.52	2137.82
296	chr1	31150634	31152167	1534	sex-indep (robust)	TAD21_chr1	STAT5_hi_dDHS	sex_indep_dynamic (n=1532)	STAT5_bound	common	992	1092	1042	0	Enh_65	Enh	enhancer	enhancer	chr1	31154913	31154915	-	nc_inter_c1_126	TAD21_chr1	2747	0.173695	0.181976	1.02833	1.02833	1	None	none	none	static	dDHS_open	dDHS_open	dDHS_open	dDHS_close	210311_E7	E7	217105_E6	E6	0	110	3877	2342	0.73	6757.04	3299.01
297	chr1	31152363	31152483	121	sex-indep (standard)	TAD21_chr1	none	sex_indep_static (n=64,584)	STAT5_bound	common	992	1092	1042	0	WP_23	WP	weak_promoter	promoter	chr1	31154913	31154915	-	nc_inter_c1_126	TAD21_chr1	2431	0.173695	0.181976	1.02833	1.02833	1	None	none	none	dDHS_open	dDHS_open	none	none	none	210312_E8	E8	217108_E7	E7	0	NA	80.019	93	-0.22	172.704	92.28
298	chr1	31152609	31153695	1087	sex-indep (robust)	TAD21_chr1	STAT5_sDHS	sex_indep_static (n=64,584)	STAT5_bound	common	992	1092	1042	3	Enh_66	Enh	enhancer	enhancer	chr1	31154913	31154915	-	nc_inter_c1_126	TAD21_chr1	1219	0.173695	0.181976	1.02833	1.02833	1	None	none	none	dDHS_open	dDHS_open	static	static	dDHS_close	210313_E7	E7	217108_E7	E7	1	NA	1810.63	1405	0.37	4328.39	1922.5
299	chr1	31209841	31210337	497	sex-indep (robust)	TAD21_chr1	STAT5_sDHS	sex_indep_static (n=64,584)	not_bound	none	0	0	0	0	Insul_25	Insul	insulator	insulator	chr1	31233279	31233281	+	lgsn	TAD21_chr1	22943	0	0	1	1	1	None	none	none	none	none	none	none	none	210324_E6	E6	217118_E6	E6	1	NA	174.159	192	-0.14	291.438	199.94
300	chr1	31210752	31211185	434	sex-indep (robust)	TAD21_chr1	STAT5_hi_dDHS	sex_indep_dynamic (n=1532)	STAT5_bound	common	111	62	86.5	0	Insul_26	Insul	insulator	insulator	chr1	31233279	31233281	+	lgsn	TAD21_chr1	22095	0	0	1	1	1	None	none	none	dDHS_close	dDHS_open	dDHS_open	dDHS_open	static	210326_E6	E6	217120_E6	E6	1	1110	986.901	647	0.61	901.299	822.83
301	chr1	33099148	33099563	416	sex-indep (standard)	TAD22_chr1	STAT5_sDHS	sex_indep_static (n=64,584)	not_bound	none	0	0	0	0	WE_130	WE	weak_enhancer	enhancer	chr1	32604136	32604138	-	gm5415	TAD22_chr1	495011	0	0	1	1	1	None	none	none	static	none	none	none	none	210375_E12	E12	217186_E11	E11	0	NA	155.331	154	0.01	97.146	161.49
302	chr1	33153760	33154053	294	Male (less stringent)	TAD22_chr1	STAT5_sDHS	male_bias_static (n=1895)	not_bound	none	0	0	0	0	WE_131	WE	weak_enhancer	enhancer	chr1	32604136	32604138	-	gm5415	TAD22_chr1	549623	0	0	1	1	1	None	none	none	dDHS_close	static	none	none	none	210381_E10	E10	217191_E11	E11	0	NA	202.401	171	0.24	80.955	223.01
303	chr1	33270676	33271583	908	Male (robust)	TAD22_chr1	STAT5_sDHS	male_bias_static (n=1895)	not_bound	none	0	0	0	0	WE_132	WE	weak_enhancer	enhancer	chr1	33726637	33726639	-	prim2	TAD22_chr1	455055	0.92363	0.967685	1.06442	1.06442	1	None	none	none	dDHS_close	none	none	none	none	210395_E6	E6	217197_E11	E11	0	NA	491.097	498	-0.02	264.453	169.18
304	chr1	33271790	33272021	232	Male (less stringent)	TAD22_chr1	STAT5_sDHS	male_bias_static (n=1895)	not_bound	none	0	0	0	0	WE_133	WE	weak_enhancer	enhancer	chr1	33726637	33726639	-	prim2	TAD22_chr1	454617	0.92363	0.967685	1.06442	1.06442	1	None	none	none	none	none	none	none	none	210397_E6	E6	217197_E11	E11	0	NA	62.76	35	0.84	97.146	57.675
305	chr1	33726339	33727411	1073	sex-indep (robust)	TAD22_chr1	STAT5_sDHS	sex_indep_static (n=64,584)	not_bound	none	0	0	0	0	Prom_48	Prom	promoter	promoter	chr1	33726637	33726639	-	prim2	TAD22_chr1	0	0.92363	0.967685	1.06442	1.06442	1	None	none	none	static	none	static	static	static	210438_E7	E7	217248_E7	E7	1	NA	491.097	499	-0.02	469.539	315.29
306	chr1	33776521	33777298	778	sex-indep (robust)	TAD22_chr1	STAT5_sDHS	sex_indep_static (n=64,584)	not_bound	none	0	0	0	0	WP_24	WP	weak_promoter	promoter	chr1	33776740	33776742	+	rab23	TAD22_chr1	0	1.55305	1.22005	0.818307	-1.22204	0.166054	None	none	none	static	static	static	static	static	210444_E7	E7	217255_E7	E7	1	NA	533.46	676	-0.34	572.082	338.36
307	chr1	33790844	33791910	1067	sex-indep (robust)	TAD22_chr1	STAT5_sDHS	sex_indep_static (n=64,584)	not_bound	none	0	0	0	0	WE_134	WE	weak_enhancer	enhancer	chr1	33777263	33777265	+	rab23	TAD22_chr1	13580	1.55305	1.22005	0.818307	-1.22204	0.166054	None	none	none	static	dDHS_close	static	static	static	210452_E7	E7	217267_E6	E6	0	NA	1281.87	1473	-0.2	809.55	1641.82
308	chr1	33796162	33796449	288	sex-indep (standard)	TAD22_chr1	STAT5_sDHS	sex_indep_static (n=64,584)	not_bound	none	0	0	0	0	Insul_27	Insul	insulator	insulator	chr1	33814593	33814595	-	bag2	TAD22_chr1	18145	0.713828	0.579604	0.854569	-1.17018	0.942329	None	none	none	static	none	none	none	none	210459_E5	E5	217273_E11	E11	0	NA	97.278	109	-0.16	91.749	107.66
309	chr1	33810886	33811572	687	sex-indep (robust)	TAD22_chr1	none	sex_indep_static (n=64,584)	not_bound	none	0	0	0	2	WE_135	WE	weak_enhancer	enhancer	chr1	33814593	33814595	-	bag2	TAD22_chr1	3022	0.713828	0.579604	0.854569	-1.17018	0.942329	None	none	none	none	none	none	none	none	210464_E5	E5	217277_E5	E5	1	NA	122.382	115	0.09	280.644	173.025
310	chr1	33811859	33812516	658	sex-indep (robust)	TAD22_chr1	STAT5_sDHS	sex_indep_static (n=64,584)	not_bound	none	0	0	0	0	WE_136	WE	weak_enhancer	enhancer	chr1	33814593	33814595	-	bag2	TAD22_chr1	2078	0.713828	0.579604	0.854569	-1.17018	0.942329	None	none	none	static	static	static	static	static	210468_E5	E5	217281_E5	E5	1	NA	384.405	448	-0.22	264.453	599.82
312	chr1	33870808	33871934	1127	sex-indep (robust)	TAD22_chr1	STAT5_sDHS	sex_indep_static (n=64,584)	not_bound	none	0	0	0	4	Prom_49	Prom	promoter	promoter	chr1	33871438	33871440	-	zfp451	TAD22_chr1	0	0.991935	1.01681	1.06552	1.06552	1	None	none	none	static	static	static	static	static	210497_E7	E7	217301_E7	E7	1	NA	472.269	539	-0.19	701.61	357.585
313	chr1	33876125	33876338	214	sex-indep (standard)	TAD22_chr1	none	sex_indep_static (n=64,584)	not_bound	none	0	0	0	0	WE_137	WE	weak_enhancer	enhancer	chr1	33871438	33871440	-	zfp451	TAD22_chr1	4686	0.991935	1.01681	1.06552	1.06552	1	None	none	none	static	static	none	none	none	210501_E12	E12	217304_E11	E11	0	NA	58.053	67	-0.21	59.367	149.955
314	chr1	33996691	33996998	308	sex-indep (robust)	TAD22_chr1	none	sex_indep_static (n=64,584)	not_bound	none	0	0	0	0	WE_138	WE	weak_enhancer	enhancer	chr1	33965069	33965071	+	dst	TAD22_chr1	31621	1.1118	1.35751	1.26522	1.26522	0.00854222	None	none	none	none	static	none	none	none	210512_E12	E12	217324_E12	E12	1	NA	65.898	51	0.37	91.749	165.335
315	chr1	34118007	34118281	275	sex-indep (standard)	TAD23_chr1	STAT5_sDHS	sex_indep_static (n=64,584)	not_bound	none	0	0	0	0	Insul_28	Insul	insulator	insulator	chr1	34174203	34174205	+	mir6896	TAD23_chr1	55923	0	0	1	1	1	None	none	none	none	none	none	none	none	210536_E7	E7	217345_E8	E8	0	NA	95.709	94	0.03	64.764	88.435
316	chr1	34160567	34160965	399	sex-indep (robust)	TAD23_chr1	STAT5_sDHS	sex_indep_static (n=64,584)	not_bound	none	0	0	0	2	WE_139	WE	weak_enhancer	enhancer	chr1	34174203	34174205	+	mir6896	TAD23_chr1	13239	0	0	1	1	1	None	none	none	none	static	none	none	none	210545_E11	E11	217354_E12	E12	0	NA	214.953	144	0.58	156.513	257.615
317	chr1	34177948	34178584	637	sex-indep (robust)	TAD23_chr1	STAT5_sDHS	sex_indep_static (n=64,584)	not_bound	none	0	0	0	2	WP_25	WP	weak_promoter	promoter	chr1	34174203	34174205	+	mir6896	TAD23_chr1	3744	0	0	1	1	1	None	none	none	static	none	none	none	none	210550_E7	E7	217359_E7	E7	1	NA	247.902	247	0.01	280.644	211.475
318	chr1	34179762	34180103	342	Male (robust)	TAD23_chr1	STAT5_sDHS	male_bias_static (n=1895)	not_bound	none	0	0	0	0	Enh_67	Enh	enhancer	enhancer	chr1	34174203	34174205	+	mir6896	TAD23_chr1	5558	0	0	1	1	1	None	none	none	static	dDHS_open	static	static	static	210553_E6	E6	217365_E6	E6	1	NA	340.473	297	0.2	593.67	292.22
319	chr1	34180255	34180560	306	sex-indep (robust)	TAD23_chr1	STAT5_sDHS	sex_indep_static (n=64,584)	not_bound	none	0	0	0	0	WE_140	WE	weak_enhancer	enhancer	chr1	34174203	34174205	+	mir6896	TAD23_chr1	6051	0	0	1	1	1	None	none	none	static	dDHS_open	static	static	static	210553_E6	E6	217367_E6	E6	1	NA	149.055	124	0.27	350.805	157.645
320	chr1	34192532	34192686	155	sex-indep (standard)	TAD23_chr1	STAT5_sDHS	sex_indep_static (n=64,584)	not_bound	none	0	0	0	0	WE_141	WE	weak_enhancer	enhancer	chr1	34174203	34174205	+	mir6896	TAD23_chr1	18328	0	0	1	1	1	None	none	none	none	none	none	none	none	210556_E11	E11	217374_E11	E11	1	NA	34.518	29	0.25	59.367	46.14
321	chr1	34224374	34224812	439	sex-indep (robust)	TAD23_chr1	STAT5_hi_dDHS	sex_indep_dynamic (n=1532)	not_bound	none	0	0	0	2	WE_142	WE	weak_enhancer	enhancer	chr1	34174203	34174205	+	mir6896	TAD23_chr1	50170	0	0	1	1	1	None	none	none	static	static	none	none	none	210564_E11	E11	217376_E11	E11	1	0	337.335	209	0.69	194.292	299.91
322	chr1	34275311	34275518	208	sex-indep (robust)	TAD24_chr1	STAT5_sDHS	sex_indep_static (n=64,584)	not_bound	none	0	0	0	0	Insul_29	Insul	insulator	insulator	chr1	34490042	34490044	-	mir5103	TAD24_chr1	214525	0	0	1	1	1	None	none	none	static	none	none	none	none	210576_E5	E5	217381_E13	E13	0	NA	73.743	75	-0.02	70.161	38.45
323	chr1	34293077	34293645	569	sex-indep (robust)	TAD24_chr1	STAT5_sDHS	sex_indep_static (n=64,584)	STAT5_bound	common	928	742	835	0	Prom_50	Prom	promoter	promoter	chr1	34490042	34490044	-	mir5103	TAD24_chr1	196398	0	0	1	1	1	None	none	none	static	static	static	static	static	210582_E7	E7	217385_E7	E7	1	NA	436.182	446	-0.03	356.202	376.81
324	chr1	34294006	34295431	1426	sex-indep (robust)	TAD24_chr1	STAT5_hi_dDHS	sex_indep_dynamic (n=1532)	STAT5_bound	common	928	742	835	7	Prom_51	Prom	promoter	promoter	chr1	34490042	34490044	-	mir5103	TAD24_chr1	194612	0	0	1	1	1	None	none	none	dDHS_close	static	dDHS_open	dDHS_open	static	210584_E7	E7	217387_E7	E7	1	1110	1790.23	1243	0.53	1192.74	1045.84
325	chr1	34308807	34309482	676	sex-indep (robust)	TAD24_chr1	STAT5_sDHS	sex_indep_static (n=64,584)	not_bound	none	0	0	0	2	WE_143	WE	weak_enhancer	enhancer	chr1	34490042	34490044	-	mir5103	TAD24_chr1	180561	0	0	1	1	1	None	none	none	static	none	none	none	none	210590_E6	E6	217393_E11	E11	0	NA	207.108	227	-0.13	205.086	157.645
326	chr1	34309735	34309846	112	sex-indep (standard)	TAD24_chr1	none	sex_indep_static (n=64,584)	not_bound	none	0	0	0	0	WE_144	WE	weak_enhancer	enhancer	chr1	34490042	34490044	-	mir5103	TAD24_chr1	180197	0	0	1	1	1	None	none	none	none	none	none	none	none	210591_E9	E9	217394_E14	E14	0	NA	9.414	12	-0.35	32.382	11.535
327	chr1	34352202	34352388	187	sex-indep (standard)	TAD24_chr1	none	sex_indep_static (n=64,584)	not_bound	none	0	0	0	0	WE_145	WE	weak_enhancer	enhancer	chr1	34490042	34490044	-	mir5103	TAD24_chr1	137655	0	0	1	1	1	None	none	none	none	none	none	none	none	210592_E14	E14	217394_E14	E14	1	NA	20.397	13	0.65	43.176	34.605
328	chr1	34363621	34363944	324	sex-indep (robust)	TAD24_chr1	STAT5_sDHS	sex_indep_static (n=64,584)	not_bound	none	0	0	0	0	WE_146	WE	weak_enhancer	enhancer	chr1	34490042	34490044	-	mir5103	TAD24_chr1	126099	0	0	1	1	1	None	none	none	none	none	none	none	none	210592_E14	E14	217395_E11	E11	0	NA	73.743	77	-0.06	97.146	142.265
329	chr1	34367707	34368061	355	sex-indep (robust)	TAD24_chr1	STAT5_sDHS	sex_indep_static (n=64,584)	not_bound	none	0	0	0	1	WE_147	WE	weak_enhancer	enhancer	chr1	34490042	34490044	-	mir5103	TAD24_chr1	121982	0	0	1	1	1	None	none	none	static	static	static	static	static	210594_E11	E11	217399_E11	E11	1	NA	108.261	133	-0.3	178.101	219.165
330	chr1	34444336	34445175	840	sex-indep (robust)	TAD24_chr1	STAT5_sDHS	sex_indep_static (n=64,584)	not_bound	none	0	0	0	1	WE_148	WE	weak_enhancer	enhancer	chr1	34490042	34490044	-	mir5103	TAD24_chr1	44868	0	0	1	1	1	None	none	none	static	dDHS_close	static	dDHS_close	static	210599_E6	E6	217405_E6	E6	1	NA	1095.16	1656	-0.6	739.389	1630.28
331	chr1	34456561	34456807	247	sex-indep (robust)	TAD24_chr1	STAT5_sDHS	sex_indep_static (n=64,584)	not_bound	none	0	0	0	0	WE_149	WE	weak_enhancer	enhancer	chr1	34490042	34490044	-	mir5103	TAD24_chr1	33236	0	0	1	1	1	None	none	none	none	static	none	none	none	210602_E2	E2	217413_E12	E12	0	NA	72.174	55	0.39	107.94	115.35
332	chr1	34469205	34469647	443	sex-indep (robust)	TAD24_chr1	none	sex_indep_static (n=64,584)	not_bound	none	0	0	0	0	WE_150	WE	weak_enhancer	enhancer	chr1	34490042	34490044	-	mir5103	TAD24_chr1	20396	0	0	1	1	1	None	none	none	none	static	none	none	none	210606_E5	E5	217420_E11	E11	0	NA	89.433	117	-0.39	194.292	188.405
333	chr1	34491473	34492096	624	sex-indep (robust)	TAD24_chr1	STAT5_sDHS	sex_indep_static (n=64,584)	STAT5_bound	common	183	109	146	4	WE_151	WE	weak_enhancer	enhancer	chr1	34490042	34490044	-	mir5103	TAD24_chr1	1430	0	0	1	1	1	None	none	none	static	static	none	none	static	210618_E7	E7	217429_E7	E7	1	NA	862.95	872	-0.02	534.303	926.645
334	chr1	34495883	34497157	1275	sex-indep (robust)	TAD24_chr1	STAT5_sDHS	sex_indep_static (n=64,584)	not_bound	none	0	0	0	0	Prom_52	Prom	promoter	promoter	chr1	34496515	34496517	-	ccdc115	TAD24_chr1	0	2.71349	2.56781	0.979197	-1.02124	1	sex_indep	none	none	static	dDHS_open	static	static	static	210623_E7	E7	217434_E7	E7	1	NA	4899.99	5141	-0.07	6141.79	4329.47
335	chr1	34500418	34500747	330	sex-indep (standard)	TAD25_chr1	none	sex_indep_static (n=64,584)	not_bound	none	0	0	0	0	WE_152	WE	weak_enhancer	enhancer	chr1	34516590	34516592	+	ptpn18	TAD25_chr1	15844	0.32408	0.383458	1.21344	1.21344	1	None	none	none	none	none	none	none	none	210626_E14	E14	217438_E5	E5	0	NA	25.104	39	-0.64	113.337	46.14
336	chr1	34516366	34516856	491	sex-indep (robust)	TAD25_chr1	STAT5_sDHS	sex_indep_static (n=64,584)	not_bound	none	0	0	0	2	WP_26	WP	weak_promoter	promoter	chr1	34516590	34516592	+	ptpn18	TAD25_chr1	0	0.32408	0.383458	1.21344	1.21344	1	None	none	none	static	static	static	static	static	210631_E12	E12	217442_E12	E12	1	NA	277.713	298	-0.1	329.217	230.7
337	chr1	34519772	34520057	286	sex-indep (standard)	TAD25_chr1	none	sex_indep_static (n=64,584)	not_bound	none	0	0	0	0	Insul_30	Insul	insulator	insulator	chr1	34516590	34516592	+	ptpn18	TAD25_chr1	3181	0.32408	0.383458	1.21344	1.21344	1	None	none	none	none	none	none	none	none	210633_E12	E12	217443_E1	E1	0	NA	40.794	64	-0.65	70.161	38.45
338	chr1	34529627	34529865	239	sex-indep (standard)	TAD25_chr1	none	sex_indep_static (n=64,584)	not_bound	none	0	0	0	0	WE_153	WE	weak_enhancer	enhancer	chr1	34516590	34516592	+	ptpn18	TAD25_chr1	13036	0.32408	0.383458	1.21344	1.21344	1	None	none	none	none	none	none	none	none	210635_E12	E12	217444_E12	E12	1	NA	36.087	51	-0.5	91.749	26.915
339	chr1	34659249	34659521	273	Female (standard)	TAD25_chr1	none	female_bias_static (n=1359)	not_bound	none	0	0	0	0	Insul_31	Insul	insulator	insulator	chr1	34636537	34636539	+	amer3	TAD25_chr1	22711	0	0	1	1	1	None	none	none	none	none	none	none	none	210661_E1	E1	217469_E12	E12	0	NA	40.794	34	0.26	26.985	53.83
340	chr1	34867012	34867398	387	sex-indep (robust)	TAD25_chr1	none	sex_indep_static (n=64,584)	not_bound	none	0	0	0	0	WE_154	WE	weak_enhancer	enhancer	chr1	34858566	34858568	+	arhgef4	TAD25_chr1	8445	0.105117	0.0702474	0.670159	-1.49218	0.837275	None	none	none	none	none	none	none	none	210684_E13	E13	217499_E5	E5	0	NA	40.794	62	-0.6	97.146	57.675
341	chr1	34899309	34900343	1035	sex-indep (robust)	TAD25_chr1	STAT5_sDHS	sex_indep_static (n=64,584)	not_bound	none	0	0	0	0	Prom_53	Prom	promoter	promoter	chr1	34899893	34899895	-	fam168b	TAD25_chr1	0	8.19277	7.47349	0.94491	-1.0583	1	sex_indep	none	none	static	dDHS_open	static	static	static	210698_E7	E7	217510_E7	E7	1	NA	1499.96	1873	-0.32	1619.1	1003.54
342	chr1	34906591	34907055	465	sex-indep (robust)	TAD25_chr1	STAT5_sDHS	sex_indep_static (n=64,584)	not_bound	none	0	0	0	0	WP_27	WP	weak_promoter	promoter	chr1	34906803	34906805	+	plekhb2	TAD25_chr1	0	1.64577	1.81635	1.14127	1.14127	0.494536	sex_indep	none	none	static	static	static	static	static	210704_E7	E7	217517_E7	E7	1	NA	276.144	376	-0.45	399.378	153.8
343	chr1	34924136	34924315	180	sex-indep (standard)	TAD25_chr1	STAT5_sDHS	sex_indep_static (n=64,584)	not_bound	none	0	0	0	0	Insul_32	Insul	insulator	insulator	chr1	34906803	34906805	+	plekhb2	TAD25_chr1	17332	1.64577	1.81635	1.14127	1.14127	0.494536	sex_indep	none	none	none	none	none	none	none	210710_E5	E5	217524_E13	E13	0	NA	56.484	70	-0.31	113.337	38.45
344	chr1	35437529	35438111	583	sex-indep (robust)	TAD26_chr1	STAT5_sDHS	sex_indep_static (n=64,584)	not_bound	none	0	0	0	0	WE_155	WE	weak_enhancer	enhancer	chr1	36125244	36125246	+	hs6st1	TAD26_chr1	687134	20.0928	17.7282	0.91448	-1.09352	0.812474	sex_indep	none	none	none	static	static	none	static	210750_E12	E12	217581_E5	E5	0	NA	133.365	141	-0.08	269.85	219.165
345	chr1	35442349	35442600	252	sex-indep (standard)	TAD26_chr1	none	sex_indep_static (n=64,584)	not_bound	none	0	0	0	0	Insul_33	Insul	insulator	insulator	chr1	36125244	36125246	+	hs6st1	TAD26_chr1	682645	20.0928	17.7282	0.91448	-1.09352	0.812474	sex_indep	none	none	none	none	none	none	none	210751_E2	E2	217583_E12	E12	0	NA	43.932	53	-0.27	48.573	53.83
346	chr1	35687586	35687727	142	sex-indep (standard)	TAD26_chr1	none	sex_indep_static (n=64,584)	not_bound	none	0	0	0	0	WE_156	WE	weak_enhancer	enhancer	chr1	36125244	36125246	+	hs6st1	TAD26_chr1	437518	20.0928	17.7282	0.91448	-1.09352	0.812474	sex_indep	none	none	none	none	none	none	none	210763_E2	E2	217597_E2	E2	1	NA	23.535	19	0.31	32.382	15.38
347	chr1	35719997	35720179	183	sex-indep (standard)	TAD26_chr1	STAT5_sDHS	sex_indep_static (n=64,584)	not_bound	none	0	0	0	0	WE_157	WE	weak_enhancer	enhancer	chr1	36125244	36125246	+	hs6st1	TAD26_chr1	405066	20.0928	17.7282	0.91448	-1.09352	0.812474	sex_indep	none	none	none	none	none	none	none	210764_E12	E12	217599_E2	E2	0	NA	59.622	53	0.17	53.97	73.055
348	chr1	35820054	35820572	519	sex-indep (standard)	TAD26_chr1	none	sex_indep_static (n=64,584)	not_bound	none	0	0	0	0	WE_158	WE	weak_enhancer	enhancer	chr1	36125244	36125246	+	hs6st1	TAD26_chr1	304673	20.0928	17.7282	0.91448	-1.09352	0.812474	sex_indep	none	none	none	none	none	none	none	210775_E13	E13	217615_E11	E11	0	NA	56.484	77	-0.45	113.337	61.52
349	chr1	35820962	35821410	449	sex-indep (robust)	TAD26_chr1	STAT5_sDHS	sex_indep_static (n=64,584)	not_bound	none	0	0	0	0	WE_159	WE	weak_enhancer	enhancer	chr1	36125244	36125246	+	hs6st1	TAD26_chr1	303835	20.0928	17.7282	0.91448	-1.09352	0.812474	sex_indep	none	none	static	dDHS_close	none	none	static	210777_E6	E6	217617_E6	E6	1	NA	367.146	430	-0.23	188.895	446.02
350	chr1	35823151	35823376	226	sex-indep (standard)	TAD26_chr1	none	sex_indep_static (n=64,584)	not_bound	none	0	0	0	0	WE_160	WE	weak_enhancer	enhancer	chr1	36125244	36125246	+	hs6st1	TAD26_chr1	301869	20.0928	17.7282	0.91448	-1.09352	0.812474	sex_indep	none	none	none	none	none	none	none	210780_E5	E5	217620_E11	E11	0	NA	48.639	43	0.18	48.573	88.435
351	chr1	35879695	35879943	249	sex-indep (standard)	TAD26_chr1	STAT5_sDHS	sex_indep_static (n=64,584)	not_bound	none	0	0	0	0	WE_161	WE	weak_enhancer	enhancer	chr1	36125244	36125246	+	hs6st1	TAD26_chr1	245302	20.0928	17.7282	0.91448	-1.09352	0.812474	sex_indep	none	none	none	none	none	none	none	210783_E13	E13	217628_E11	E11	0	NA	51.777	80	-0.63	91.749	130.73
352	chr1	35880546	35880949	404	sex-indep (standard)	TAD26_chr1	STAT5_sDHS	sex_indep_static (n=64,584)	not_bound	none	0	0	0	0	WE_162	WE	weak_enhancer	enhancer	chr1	36125244	36125246	+	hs6st1	TAD26_chr1	244296	20.0928	17.7282	0.91448	-1.09352	0.812474	sex_indep	none	none	static	none	none	none	none	210784_E5	E5	217628_E11	E11	0	NA	122.382	161	-0.4	156.513	99.97
353	chr1	35893280	35893878	599	sex-indep (robust)	TAD26_chr1	STAT5_sDHS	sex_indep_static (n=64,584)	not_bound	none	0	0	0	4	WE_163	WE	weak_enhancer	enhancer	chr1	36125244	36125246	+	hs6st1	TAD26_chr1	231367	20.0928	17.7282	0.91448	-1.09352	0.812474	sex_indep	none	none	static	dDHS_close	static	static	static	210791_E6	E6	217632_E6	E6	1	NA	961.797	1141	-0.25	750.183	1499.55
354	chr1	35894134	35894328	195	sex-indep (standard)	TAD26_chr1	STAT5_sDHS	sex_indep_static (n=64,584)	not_bound	none	0	0	0	0	WE_164	WE	weak_enhancer	enhancer	chr1	36125244	36125246	+	hs6st1	TAD26_chr1	230917	20.0928	17.7282	0.91448	-1.09352	0.812474	sex_indep	none	none	static	none	none	none	none	210793_E6	E6	217634_E6	E6	1	NA	120.813	144	-0.25	161.91	126.885
355	chr1	35903424	35903784	361	sex-indep (standard)	TAD26_chr1	STAT5_sDHS	sex_indep_static (n=64,584)	not_bound	none	0	0	0	0	Insul_34	Insul	insulator	insulator	chr1	36125244	36125246	+	hs6st1	TAD26_chr1	221461	20.0928	17.7282	0.91448	-1.09352	0.812474	sex_indep	none	none	none	none	none	none	none	210800_E13	E13	217641_E5	E5	0	NA	53.346	98	-0.88	151.116	65.365
356	chr1	35926255	35926886	632	sex-indep (robust)	TAD26_chr1	STAT5_sDHS	sex_indep_static (n=64,584)	not_bound	none	0	0	0	0	WE_165	WE	weak_enhancer	enhancer	chr1	36125244	36125246	+	hs6st1	TAD26_chr1	198359	20.0928	17.7282	0.91448	-1.09352	0.812474	sex_indep	none	none	static	static	static	static	static	210806_E5	E5	217648_E5	E5	1	NA	283.989	242	0.23	280.644	230.7
357	chr1	35932213	35932688	476	sex-indep (robust)	TAD26_chr1	STAT5_sDHS	sex_indep_static (n=64,584)	not_bound	none	0	0	0	0	WE_166	WE	weak_enhancer	enhancer	chr1	36125244	36125246	+	hs6st1	TAD26_chr1	192557	20.0928	17.7282	0.91448	-1.09352	0.812474	sex_indep	none	none	none	none	none	none	static	210808_E5	E5	217650_E5	E5	1	NA	158.469	163	-0.04	280.644	149.955
358	chr1	35935273	35935603	331	sex-indep (standard)	TAD26_chr1	none	sex_indep_static (n=64,584)	not_bound	none	0	0	0	0	WE_167	WE	weak_enhancer	enhancer	chr1	36125244	36125246	+	hs6st1	TAD26_chr1	189642	20.0928	17.7282	0.91448	-1.09352	0.812474	sex_indep	none	none	none	none	none	none	none	210810_E5	E5	217652_E11	E11	0	NA	43.932	34	0.37	48.573	65.365
359	chr1	35946718	35946914	197	sex-indep (standard)	TAD26_chr1	none	sex_indep_static (n=64,584)	not_bound	none	0	0	0	0	WE_168	WE	weak_enhancer	enhancer	chr1	36125244	36125246	+	hs6st1	TAD26_chr1	178331	20.0928	17.7282	0.91448	-1.09352	0.812474	sex_indep	none	none	none	none	none	none	none	210813_E13	E13	217655_E13	E13	1	NA	39.225	33	0.25	59.367	38.45
360	chr1	35982623	35984183	1561	Male (robust)	TAD26_chr1	STAT5_hi_dDHS	male_bias_dynamic (n=834)	STAT5_bound	common	1304	1013	1158.5	5	Enh_68	Enh	enhancer	enhancer	chr1	36125244	36125246	+	hs6st1	TAD26_chr1	141062	20.0928	17.7282	0.91448	-1.09352	0.812474	sex_indep	none	none	dDHS_close	static	none	none	none	210817_E6	E6	217660_E6	E6	1	1000	1741.59	908	0.94	453.348	1314.99
361	chr1	35987930	35988222	293	sex-indep (robust)	TAD26_chr1	none	sex_indep_static (n=64,584)	not_bound	none	0	0	0	0	WE_169	WE	weak_enhancer	enhancer	chr1	36125244	36125246	+	hs6st1	TAD26_chr1	137023	20.0928	17.7282	0.91448	-1.09352	0.812474	sex_indep	none	none	none	none	none	none	none	210821_E5	E5	217665_E11	E11	0	NA	120.813	93	0.38	145.719	153.8
362	chr1	35990272	35990824	553	Male (robust)	TAD26_chr1	STAT5_hi_dDHS	male_bias_dynamic (n=834)	STAT5_bound	common	160	105	132.5	4	WE_170	WE	weak_enhancer	enhancer	chr1	36125244	36125246	+	hs6st1	TAD26_chr1	134421	20.0928	17.7282	0.91448	-1.09352	0.812474	sex_indep	none	none	dDHS_close	static	none	none	none	210823_E5	E5	217667_E5	E5	1	1000	701.343	202	1.8	167.307	288.375
363	chr1	36004973	36005127	155	sex-indep (robust)	TAD26_chr1	STAT5_sDHS	sex_indep_static (n=64,584)	not_bound	none	0	0	0	2	WE_171	WE	weak_enhancer	enhancer	chr1	36125244	36125246	+	hs6st1	TAD26_chr1	120118	20.0928	17.7282	0.91448	-1.09352	0.812474	sex_indep	none	none	static	static	none	none	none	210825_E5	E5	217674_E5	E5	1	NA	65.898	54	0.29	86.352	111.505
364	chr1	36087249	36087544	296	sex-indep (robust)	TAD26_chr1	STAT5_sDHS	sex_indep_static (n=64,584)	not_bound	none	0	0	0	1	Insul_35	Insul	insulator	insulator	chr1	36125244	36125246	+	hs6st1	TAD26_chr1	37701	20.0928	17.7282	0.91448	-1.09352	0.812474	sex_indep	none	none	static	none	none	none	none	210841_E5	E5	217692_E5	E5	1	NA	114.537	123	-0.1	134.925	103.815
365	chr1	36121493	36122291	799	sex-indep (robust)	TAD26_chr1	none	sex_indep_static (n=64,584)	STAT5_bound	common	425	231	328	1	Enh_69	Enh	enhancer	enhancer	chr1	36125244	36125246	+	hs6st1	TAD26_chr1	2954	20.0928	17.7282	0.91448	-1.09352	0.812474	sex_indep	none	none	none	none	none	none	none	210850_E6	E6	217698_E7	E7	0	NA	444.027	535	-0.27	496.524	488.315
366	chr1	36122350	36123804	1455	sex-indep (robust)	TAD26_chr1	STAT5_sDHS	sex_indep_static (n=64,584)	STAT5_bound	common	425	231	328	1	Enh_70	Enh	enhancer	enhancer	chr1	36125244	36125246	+	hs6st1	TAD26_chr1	1441	20.0928	17.7282	0.91448	-1.09352	0.812474	sex_indep	none	none	static	dDHS_close	static	dDHS_close	static	210850_E6	E6	217700_E7	E7	0	NA	2318.98	2740	-0.24	2045.46	3552.78
368	chr1	36127044	36127913	870	sex-indep (robust)	TAD26_chr1	none	sex_indep_static (n=64,584)	not_bound	none	0	0	0	1	Prom_54	Prom	promoter	promoter	chr1	36125244	36125246	+	hs6st1	TAD26_chr1	1799	20.0928	17.7282	0.91448	-1.09352	0.812474	sex_indep	none	none	none	none	none	none	none	210853_E7	E7	217707_E7	E7	1	NA	374.991	457	-0.29	366.996	296.065
369	chr1	36128178	36128619	442	sex-indep (robust)	TAD26_chr1	none	sex_indep_static (n=64,584)	not_bound	none	0	0	0	0	WP_28	WP	weak_promoter	promoter	chr1	36125244	36125246	+	hs6st1	TAD26_chr1	2933	20.0928	17.7282	0.91448	-1.09352	0.812474	sex_indep	none	none	none	none	none	none	none	210854_E8	E8	217710_E8	E8	1	NA	233.781	243	-0.06	161.91	207.63
370	chr1	36129492	36130889	1398	sex-indep (robust)	TAD26_chr1	STAT5_sDHS	sex_indep_static (n=64,584)	STAT5_bound	common	218	162	190	1	WP_29	WP	weak_promoter	promoter	chr1	36125244	36125246	+	hs6st1	TAD26_chr1	4247	20.0928	17.7282	0.91448	-1.09352	0.812474	sex_indep	none	none	static	static	static	static	static	210857_E7	E7	217711_E7	E7	1	NA	3343.54	3416	-0.03	2838.82	3687.36
371	chr1	36131183	36131514	332	sex-indep (robust)	TAD26_chr1	none	sex_indep_static (n=64,584)	not_bound	none	0	0	0	0	Enh_71	Enh	enhancer	enhancer	chr1	36125244	36125246	+	hs6st1	TAD26_chr1	5938	20.0928	17.7282	0.91448	-1.09352	0.812474	sex_indep	none	none	none	none	none	none	none	210860_E6	E6	217713_E7	E7	0	NA	147.486	184	-0.32	167.307	169.18
372	chr1	36131686	36133197	1512	sex-indep (robust)	TAD26_chr1	STAT5_sDHS	sex_indep_static (n=64,584)	STAT5_bound	common	745	950	847.5	2	Enh_72	Enh	enhancer	enhancer	chr1	36125244	36125246	+	hs6st1	TAD26_chr1	6441	20.0928	17.7282	0.91448	-1.09352	0.812474	sex_indep	none	none	static	static	static	static	static	210862_E6	E6	217716_E6	E6	1	NA	2535.5	2463	0.04	1969.9	2833.76
373	chr1	36133637	36133810	174	sex-indep (standard)	TAD26_chr1	none	sex_indep_static (n=64,584)	not_bound	none	0	0	0	0	Enh_73	Enh	enhancer	enhancer	chr1	36125244	36125246	+	hs6st1	TAD26_chr1	8392	20.0928	17.7282	0.91448	-1.09352	0.812474	sex_indep	none	none	none	none	none	none	none	210862_E6	E6	217718_E6	E6	1	NA	37.656	45	-0.26	48.573	42.295
374	chr1	36136412	36136913	502	sex-indep (robust)	TAD26_chr1	STAT5_sDHS	sex_indep_static (n=64,584)	STAT5_bound	common	218	112	165	2	Enh_74	Enh	enhancer	enhancer	chr1	36125244	36125246	+	hs6st1	TAD26_chr1	11167	20.0928	17.7282	0.91448	-1.09352	0.812474	sex_indep	none	none	none	none	none	none	none	210868_E6	E6	217724_E6	E6	1	NA	343.611	198	0.8	183.498	173.025
375	chr1	36140497	36140695	199	sex-indep (standard)	TAD26_chr1	none	sex_indep_static (n=64,584)	not_bound	none	0	0	0	0	WE_172	WE	weak_enhancer	enhancer	chr1	36125244	36125246	+	hs6st1	TAD26_chr1	15252	20.0928	17.7282	0.91448	-1.09352	0.812474	sex_indep	none	none	none	none	none	none	none	210875_E11	E11	217729_E11	E11	1	NA	53.346	59	-0.15	53.97	42.295
376	chr1	36145145	36145467	323	sex-indep (standard)	TAD26_chr1	STAT5_sDHS	sex_indep_static (n=64,584)	not_bound	none	0	0	0	0	Enh_75	Enh	enhancer	enhancer	chr1	36125244	36125246	+	hs6st1	TAD26_chr1	19900	20.0928	17.7282	0.91448	-1.09352	0.812474	sex_indep	none	none	none	none	none	none	none	210879_E6	E6	217731_E6	E6	1	NA	127.089	106	0.26	113.337	92.28
377	chr1	36147241	36147415	175	sex-indep (standard)	TAD26_chr1	STAT5_sDHS	sex_indep_static (n=64,584)	not_bound	none	0	0	0	0	Enh_76	Enh	enhancer	enhancer	chr1	36125244	36125246	+	hs6st1	TAD26_chr1	21996	20.0928	17.7282	0.91448	-1.09352	0.812474	sex_indep	none	none	none	none	none	none	none	210885_E6	E6	217737_E6	E6	1	NA	39.225	66	-0.75	70.161	84.59
378	chr1	36150424	36150944	521	sex-indep (robust)	TAD26_chr1	STAT5_hi_dDHS	sex_indep_dynamic (n=1532)	STAT5_bound	common	308	211	259.5	2	Enh_77	Enh	enhancer	enhancer	chr1	36125244	36125246	+	hs6st1	TAD26_chr1	25179	20.0928	17.7282	0.91448	-1.09352	0.812474	sex_indep	none	none	static	none	dDHS_open	static	none	210888_E6	E6	217741_E6	E6	1	100	473.838	200	1.24	172.704	257.615
379	chr1	36151783	36151908	126	sex-indep (standard)	TAD26_chr1	none	sex_indep_static (n=64,584)	not_bound	none	0	0	0	0	Enh_78	Enh	enhancer	enhancer	chr1	36125244	36125246	+	hs6st1	TAD26_chr1	26538	20.0928	17.7282	0.91448	-1.09352	0.812474	sex_indep	none	none	none	none	none	none	none	210891_E6	E6	217743_E11	E11	0	NA	32.949	24	0.46	10.794	26.915
380	chr1	36152294	36152572	279	sex-indep (standard)	TAD26_chr1	none	sex_indep_static (n=64,584)	not_bound	none	0	0	0	0	Enh_79	Enh	enhancer	enhancer	chr1	36125244	36125246	+	hs6st1	TAD26_chr1	27049	20.0928	17.7282	0.91448	-1.09352	0.812474	sex_indep	none	none	none	none	none	none	none	210893_E6	E6	217743_E11	E11	0	NA	62.76	72	-0.2	53.97	53.83
381	chr1	36157940	36158793	854	Male (robust)	TAD26_chr1	STAT5_sDHS	male_bias_static (n=1895)	STAT5_bound	common	212	61	136.5	3	Enh_80	Enh	enhancer	enhancer	chr1	36125244	36125246	+	hs6st1	TAD26_chr1	32695	20.0928	17.7282	0.91448	-1.09352	0.812474	sex_indep	none	none	dDHS_close	static	none	static	dDHS_open	210904_E6	E6	217751_E6	E6	1	NA	558.564	613	-0.13	280.644	469.09
382	chr1	36160457	36161040	584	sex-indep (standard)	TAD26_chr1	none	sex_indep_static (n=64,584)	not_bound	none	0	0	0	0	WE_173	WE	weak_enhancer	enhancer	chr1	36125244	36125246	+	hs6st1	TAD26_chr1	35212	20.0928	17.7282	0.91448	-1.09352	0.812474	sex_indep	none	none	none	none	none	none	none	210908_E5	E5	217756_E11	E11	0	NA	97.278	108	-0.15	113.337	134.575
383	chr1	36166895	36167185	291	sex-indep (robust)	TAD26_chr1	STAT5_sDHS	sex_indep_static (n=64,584)	not_bound	none	0	0	0	0	WE_174	WE	weak_enhancer	enhancer	chr1	36201156	36201158	-	mir6897	TAD26_chr1	33972	0.140683	0	0.275896	-3.62456	1	None	none	none	static	static	none	none	none	210916_E6	E6	217764_E6	E6	1	NA	134.934	189	-0.49	134.925	211.475
384	chr1	36190594	36190771	178	sex-indep (standard)	TAD26_chr1	none	sex_indep_static (n=64,584)	not_bound	none	0	0	0	0	Insul_36	Insul	insulator	insulator	chr1	36201156	36201158	-	mir6897	TAD26_chr1	10386	0.140683	0	0.275896	-3.62456	1	None	none	none	none	none	none	none	none	210922_E10	E10	217776_E10	E10	1	NA	50.208	70	-0.48	102.543	138.42
385	chr1	36191548	36191698	151	sex-indep (standard)	TAD26_chr1	STAT5_sDHS	sex_indep_static (n=64,584)	not_bound	none	0	0	0	0	Insul_37	Insul	insulator	insulator	chr1	36201156	36201158	-	mir6897	TAD26_chr1	9459	0.140683	0	0.275896	-3.62456	1	None	none	none	static	none	none	none	none	210922_E10	E10	217777_E5	E5	0	NA	43.932	68	-0.63	64.764	92.28
386	chr1	36300800	36301381	582	sex-indep (robust)	TAD27_chr1	STAT5_sDHS	sex_indep_static (n=64,584)	not_bound	none	0	0	0	0	Prom_55	Prom	promoter	promoter	chr1	36301145	36301147	-	uggt1	TAD27_chr1	0	5.08483	6.10452	1.24706	1.24706	0.027284	None	none	none	static	static	static	static	static	210936_E7	E7	217792_E7	E7	1	NA	658.98	694	-0.07	674.625	480.625
387	chr1	36312003	36312298	296	sex-indep (robust)	TAD27_chr1	STAT5_sDHS	sex_indep_static (n=64,584)	not_bound	none	0	0	0	1	Insul_38	Insul	insulator	insulator	chr1	36301145	36301147	-	uggt1	TAD27_chr1	10857	5.08483	6.10452	1.24706	1.24706	0.027284	None	none	none	static	static	static	static	static	210944_E6	E6	217803_E7	E7	0	NA	95.709	131	-0.45	210.483	153.8
388	chr1	36321051	36321248	198	sex-indep (robust)	TAD27_chr1	STAT5_sDHS	sex_indep_static (n=64,584)	not_bound	none	0	0	0	0	WE_175	WE	weak_enhancer	enhancer	chr1	36330268	36330270	-	neurl3	TAD27_chr1	9021	1.88021	1.32851	0.735426	-1.35976	0.060051	None	none	none	static	static	static	static	static	210949_E5	E5	217810_E5	E5	1	NA	120.813	139	-0.2	178.101	165.335
389	chr1	36327581	36327805	225	sex-indep (robust)	TAD27_chr1	STAT5_sDHS	sex_indep_static (n=64,584)	not_bound	none	0	0	0	0	WE_176	WE	weak_enhancer	enhancer	chr1	36330268	36330270	-	neurl3	TAD27_chr1	2464	1.88021	1.32851	0.735426	-1.35976	0.060051	None	none	none	none	none	none	none	none	210955_E5	E5	217818_E12	E12	0	NA	65.898	98	-0.57	134.925	84.59
390	chr1	36329502	36329625	124	sex-indep (standard)	TAD27_chr1	none	sex_indep_static (n=64,584)	not_bound	none	0	0	0	0	WE_177	WE	weak_enhancer	enhancer	chr1	36330268	36330270	-	neurl3	TAD27_chr1	644	1.88021	1.32851	0.735426	-1.35976	0.060051	None	none	none	none	none	none	none	none	210957_E5	E5	217824_E7	E7	0	NA	21.966	33	-0.59	32.382	23.07
391	chr1	36330128	36330491	364	sex-indep (robust)	TAD27_chr1	STAT5_sDHS	sex_indep_static (n=64,584)	not_bound	none	0	0	0	0	WE_178	WE	weak_enhancer	enhancer	chr1	36330268	36330270	-	neurl3	TAD27_chr1	0	1.88021	1.32851	0.735426	-1.35976	0.060051	None	none	none	static	static	static	static	static	210960_E5	E5	217826_E12	E12	0	NA	142.779	172	-0.27	232.071	173.025
392	chr1	36360258	36360559	302	sex-indep (robust)	TAD28_chr1	STAT5_sDHS	sex_indep_static (n=64,584)	not_bound	none	0	0	0	0	WE_179	WE	weak_enhancer	enhancer	chr1	36364577	36364579	+	arid5a	TAD28_chr1	4019	0.274234	0.17109	0.642498	-1.55642	0.605606	None	none	none	static	static	dDHS_open	dDHS_open	dDHS_open	210967_E12	E12	217832_E12	E12	1	NA	222.798	129	0.79	124.131	123.04
393	chr1	36364277	36365122	846	sex-indep (robust)	TAD28_chr1	STAT5_sDHS	sex_indep_static (n=64,584)	STAT5_bound	common	256	140	198	3	WP_30	WP	weak_promoter	promoter	chr1	36364577	36364579	+	arid5a	TAD28_chr1	0	0.274234	0.17109	0.642498	-1.55642	0.605606	None	none	none	static	static	dDHS_open	dDHS_open	static	210971_E7	E7	217835_E7	E7	1	NA	812.742	655	0.31	868.917	503.695
394	chr1	36366485	36366685	201	sex-indep (standard)	TAD28_chr1	none	sex_indep_static (n=64,584)	not_bound	none	0	0	0	0	WE_180	WE	weak_enhancer	enhancer	chr1	36364577	36364579	+	arid5a	TAD28_chr1	1907	0.274234	0.17109	0.642498	-1.55642	0.605606	None	none	none	none	none	none	none	none	210975_E5	E5	217837_E11	E11	0	NA	50.208	44	0.19	21.588	38.45
395	chr1	36373694	36373996	303	sex-indep (robust)	TAD28_chr1	STAT5_sDHS	sex_indep_static (n=64,584)	STAT5_bound	female_enriched	107	164	135.5	2	WE_181	WE	weak_enhancer	enhancer	chr1	36364577	36364579	+	arid5a	TAD28_chr1	9116	0.274234	0.17109	0.642498	-1.55642	0.605606	None	none	none	static	static	static	none	none	210977_E5	E5	217839_E11	E11	0	NA	142.779	61	1.23	97.146	192.25
396	chr1	36380986	36381181	196	sex-indep (standard)	TAD28_chr1	none	sex_indep_static (n=64,584)	not_bound	none	0	0	0	0	Insul_39	Insul	insulator	insulator	chr1	36364577	36364579	+	arid5a	TAD28_chr1	16408	0.274234	0.17109	0.642498	-1.55642	0.605606	None	none	none	none	none	none	none	none	210980_E13	E13	217842_E13	E13	1	NA	48.639	54	-0.15	102.543	34.605
397	chr1	36413911	36414459	549	sex-indep (robust)	TAD28_chr1	STAT5_sDHS	sex_indep_static (n=64,584)	not_bound	none	0	0	0	0	Enh_81	Enh	enhancer	enhancer	chr1	36405601	36405603	-	mir6898	TAD28_chr1	8309	0	0	1	1	1	None	none	none	dDHS_open	static	static	static	static	210989_E9	E9	217853_E6	E6	0	NA	354.594	605	-0.77	836.535	584.44
398	chr1	36425051	36425193	143	sex-indep (standard)	TAD28_chr1	none	sex_indep_static (n=64,584)	not_bound	none	0	0	0	0	WP_31	WP	weak_promoter	promoter	chr1	36426024	36426026	-	kansl3	TAD28_chr1	832	4.86403	5.33514	1.13373	1.13373	0.494707	sex_indep	none	none	none	none	none	none	none	211005_E7	E7	217862_E7	E7	1	NA	58.053	89	-0.62	124.131	53.83
399	chr1	36425705	36426287	583	sex-indep (robust)	TAD28_chr1	STAT5_sDHS	sex_indep_static (n=64,584)	not_bound	none	0	0	0	0	Prom_56	Prom	promoter	promoter	chr1	36426024	36426026	-	kansl3	TAD28_chr1	0	4.86403	5.33514	1.13373	1.13373	0.494707	sex_indep	none	none	static	dDHS_open	static	static	dDHS_close	211007_E7	E7	217862_E7	E7	1	NA	814.311	870	-0.1	1020.03	365.275
400	chr1	36427832	36428052	221	sex-indep (robust)	TAD28_chr1	STAT5_sDHS	sex_indep_static (n=64,584)	not_bound	none	0	0	0	0	WE_182	WE	weak_enhancer	enhancer	chr1	36429135	36429137	+	fer1l5	TAD28_chr1	1084	0.378217	0.419744	1.13427	1.13427	0.971691	None	none	none	static	static	dDHS_open	dDHS_open	static	211012_E6	E6	217866_E6	E6	1	NA	219.66	248	-0.18	280.644	353.74
401	chr1	36501803	36502345	543	sex-indep (robust)	TAD28_chr1	STAT5_sDHS	sex_indep_static (n=64,584)	not_bound	none	0	0	0	0	Prom_57	Prom	promoter	promoter	chr1	36502082	36502084	-	lman2l	TAD28_chr1	0	3.84817	3.32652	0.894502	-1.11794	0.803357	sex_indep	none	none	static	static	static	static	static	211025_E7	E7	217890_E7	E7	1	NA	240.057	298	-0.31	399.378	238.39
402	chr1	36522546	36523068	523	sex-indep (robust)	TAD28_chr1	STAT5_sDHS	sex_indep_static (n=64,584)	not_bound	none	0	0	0	0	WE_183	WE	weak_enhancer	enhancer	chr1	36528341	36528343	-	nc_inter_c1_150	TAD28_chr1	5274	0	0.0482754	3.64816	3.64816	1	None	none	none	static	static	static	static	static	211034_E5	E5	217899_E11	E11	0	NA	567.978	652	-0.2	545.097	915.11
403	chr1	36526669	36527449	781	sex-indep (robust)	TAD28_chr1	STAT5_sDHS	sex_indep_static (n=64,584)	not_bound	none	0	0	0	0	Enh_82	Enh	enhancer	enhancer	chr1	36528341	36528343	-	nc_inter_c1_150	TAD28_chr1	893	0	0.0482754	3.64816	3.64816	1	None	none	none	static	static	none	none	static	211037_E6	E6	217904_E6	E6	1	NA	662.118	1042	-0.65	566.685	565.215
404	chr1	36527943	36528983	1041	sex-indep (robust)	TAD28_chr1	STAT5_sDHS	sex_indep_static (n=64,584)	not_bound	none	0	0	0	2	WP_32	WP	weak_promoter	promoter	chr1	36528341	36528343	-	nc_inter_c1_150	TAD28_chr1	0	0	0.0482754	3.64816	3.64816	1	None	none	none	static	static	static	static	static	211039_E7	E7	217906_E7	E7	1	NA	895.899	1072	-0.26	933.681	615.2
405	chr1	36533346	36533565	220	sex-indep (robust)	TAD28_chr1	STAT5_sDHS	sex_indep_static (n=64,584)	not_bound	none	0	0	0	0	Enh_83	Enh	enhancer	enhancer	chr1	36528441	36528443	+	cnnm4	TAD28_chr1	4904	0.501237	0.444575	0.928271	-1.07727	1	None	none	none	static	static	none	none	none	211046_E6	E6	217913_E6	E6	1	NA	87.864	112	-0.35	91.749	161.49
406	chr1	36558198	36558437	240	sex-indep (standard)	TAD28_chr1	STAT5_sDHS	sex_indep_static (n=64,584)	not_bound	none	0	0	0	0	Insul_40	Insul	insulator	insulator	chr1	36568720	36568722	+	cnnm3	TAD28_chr1	10284	2.07661	2.01226	1.00507	1.00507	1	sex_indep	none	none	static	none	none	none	none	211050_E13	E13	217920_E13	E13	1	NA	51.777	85	-0.72	97.146	49.985
407	chr1	36568277	36569830	1554	sex-indep (robust)	TAD28_chr1	STAT5_sDHS	sex_indep_static (n=64,584)	not_bound	none	0	0	0	0	WP_33	WP	weak_promoter	promoter	chr1	36568720	36568722	+	cnnm3	TAD28_chr1	0	2.07661	2.01226	1.00507	1.00507	1	sex_indep	none	none	static	dDHS_open	static	static	static	211054_E7	E7	217923_E5	E5	0	NA	1644.31	1744	-0.08	1975.3	1103.52
408	chr1	36582267	36582959	693	sex-indep (robust)	TAD29_chr1	STAT5_sDHS	sex_indep_static (n=64,584)	not_bound	none	0	0	0	0	Enh_84	Enh	enhancer	enhancer	chr1	36592572	36592574	-	ankrd23	TAD29_chr1	9614	0.909051	0.844747	0.956619	-1.04535	1	None	none	none	static	static	none	none	none	211062_E6	E6	217933_E6	E6	1	NA	381.267	469	-0.3	280.644	615.2
409	chr1	36583769	36584074	306	sex-indep (robust)	TAD29_chr1	STAT5_sDHS	sex_indep_static (n=64,584)	not_bound	none	0	0	0	0	Enh_85	Enh	enhancer	enhancer	chr1	36592572	36592574	-	ankrd23	TAD29_chr1	8499	0.909051	0.844747	0.956619	-1.04535	1	None	none	none	static	static	none	none	none	211064_E6	E6	217935_E6	E6	1	NA	164.745	170	-0.05	172.704	384.5
410	chr1	36584139	36584306	168	sex-indep (standard)	TAD29_chr1	STAT5_sDHS	sex_indep_static (n=64,584)	not_bound	none	0	0	0	0	Enh_86	Enh	enhancer	enhancer	chr1	36592572	36592574	-	ankrd23	TAD29_chr1	8267	0.909051	0.844747	0.956619	-1.04535	1	None	none	none	static	static	none	none	none	211064_E6	E6	217936_E9	E9	0	NA	56.484	66	-0.22	107.94	96.125
411	chr1	36587465	36587658	194	sex-indep (robust)	TAD29_chr1	none	sex_indep_static (n=64,584)	not_bound	none	0	0	0	0	WE_184	WE	weak_enhancer	enhancer	chr1	36592572	36592574	-	ankrd23	TAD29_chr1	4915	0.909051	0.844747	0.956619	-1.04535	1	None	none	none	none	none	none	none	none	211068_E5	E5	217941_E5	E5	1	NA	40.794	58	-0.51	53.97	76.9
412	chr1	36591433	36591691	259	sex-indep (standard)	TAD29_chr1	none	sex_indep_static (n=64,584)	not_bound	none	0	0	0	0	WE_185	WE	weak_enhancer	enhancer	chr1	36592572	36592574	-	ankrd23	TAD29_chr1	882	0.909051	0.844747	0.956619	-1.04535	1	None	none	none	none	none	none	none	none	211072_E5	E5	217943_E11	E11	0	NA	59.622	80	-0.42	80.955	115.35
413	chr1	36592900	36593516	617	sex-indep (robust)	TAD29_chr1	STAT5_sDHS	sex_indep_static (n=64,584)	not_bound	none	0	0	0	0	WE_186	WE	weak_enhancer	enhancer	chr1	36592572	36592574	-	ankrd23	TAD29_chr1	327	0.909051	0.844747	0.956619	-1.04535	1	None	none	none	static	static	none	none	none	211073_E6	E6	217944_E6	E6	1	NA	246.333	281	-0.19	205.086	396.035
414	chr1	36594569	36594717	149	sex-indep (standard)	TAD29_chr1	none	sex_indep_static (n=64,584)	not_bound	none	0	0	0	0	WE_187	WE	weak_enhancer	enhancer	chr1	36592572	36592574	-	ankrd23	TAD29_chr1	1996	0.909051	0.844747	0.956619	-1.04535	1	None	none	none	none	none	none	none	none	211078_E6	E6	217946_E11	E11	0	NA	39.225	38	0.05	53.97	42.295
415	chr1	36596035	36596720	686	sex-indep (robust)	TAD29_chr1	STAT5_sDHS	sex_indep_static (n=64,584)	not_bound	none	0	0	0	2	WE_188	WE	weak_enhancer	enhancer	chr1	36592572	36592574	-	ankrd23	TAD29_chr1	3462	0.909051	0.844747	0.956619	-1.04535	1	None	none	none	static	static	static	dDHS_close	static	211082_E6	E6	217950_E6	E6	1	NA	549.15	764	-0.48	831.138	784.38
416	chr1	36603588	36604764	1177	sex-indep (robust)	TAD29_chr1	STAT5_sDHS	sex_indep_static (n=64,584)	not_bound	none	0	0	0	0	Prom_58	Prom	promoter	promoter	chr1	36604044	36604046	-	ankrd39	TAD29_chr1	0	0.946861	0.991615	1.09267	1.09267	1	None	none	none	static	static	static	static	static	211092_E5	E5	217955_E7	E7	0	NA	1302.27	1517	-0.22	1203.53	1265.01
417	chr1	36611369	36611715	347	sex-indep (robust)	TAD29_chr1	none	sex_indep_static (n=64,584)	not_bound	none	0	0	0	0	WE_189	WE	weak_enhancer	enhancer	chr1	36614400	36614402	-	sema4c	TAD29_chr1	2686	0.608178	0.593228	1.01007	1.01007	1	None	none	none	none	none	none	none	none	211094_E5	E5	217960_E11	E11	0	NA	92.571	116	-0.33	172.704	99.97
418	chr1	36613356	36614761	1406	sex-indep (robust)	TAD29_chr1	STAT5_sDHS	sex_indep_static (n=64,584)	not_bound	none	0	0	0	1	WP_34	WP	weak_promoter	promoter	chr1	36614400	36614402	-	sema4c	TAD29_chr1	0	0.608178	0.593228	1.01007	1.01007	1	None	none	none	dDHS_open	static	static	static	static	211100_E7	E7	217966_E7	E7	1	NA	742.137	874	-0.24	1127.97	511.385
419	chr1	36615057	36615245	189	sex-indep (robust)	TAD29_chr1	STAT5_sDHS	sex_indep_static (n=64,584)	not_bound	none	0	0	0	0	WP_35	WP	weak_promoter	promoter	chr1	36615224	36615226	-	sema4c	TAD29_chr1	0	0.608178	0.593228	1.01007	1.01007	1	None	none	none	none	none	none	none	none	211100_E7	E7	217966_E7	E7	1	NA	97.278	107	-0.14	134.925	46.14
420	chr1	36617666	36618000	335	sex-indep (standard)	TAD29_chr1	none	sex_indep_static (n=64,584)	not_bound	none	0	0	0	0	WE_190	WE	weak_enhancer	enhancer	chr1	36615224	36615226	-	sema4c	TAD29_chr1	2441	0.608178	0.593228	1.01007	1.01007	1	None	none	none	none	none	none	none	none	211105_E5	E5	217970_E5	E5	1	NA	78.45	98	-0.32	124.131	103.815
421	chr1	36628468	36628813	346	sex-indep (robust)	TAD29_chr1	STAT5_sDHS	sex_indep_static (n=64,584)	not_bound	none	0	0	0	1	WE_191	WE	weak_enhancer	enhancer	chr1	36615224	36615226	-	sema4c	TAD29_chr1	13243	0.608178	0.593228	1.01007	1.01007	1	None	none	none	static	none	none	none	static	211111_E5	E5	217977_E5	E5	1	NA	175.728	160	0.14	188.895	134.575
422	chr1	36637346	36637501	156	sex-indep (standard)	TAD29_chr1	none	sex_indep_static (n=64,584)	not_bound	none	0	0	0	0	WE_192	WE	weak_enhancer	enhancer	chr1	36650175	36650177	-	fam178b	TAD29_chr1	12675	0.00630504	0.00913232	1.44224	1.44224	1	None	none	none	none	none	none	none	none	211116_E12	E12	217983_E6	E6	0	NA	28.242	48	-0.77	86.352	26.915
423	chr1	36653008	36653244	237	sex-indep (robust)	TAD29_chr1	none	sex_indep_static (n=64,584)	not_bound	none	0	0	0	0	WE_193	WE	weak_enhancer	enhancer	chr1	36650175	36650177	-	fam178b	TAD29_chr1	2832	0.00630504	0.00913232	1.44224	1.44224	1	None	none	none	none	none	none	none	none	211119_E5	E5	217990_E11	E11	0	NA	72.174	82	-0.18	64.764	80.745
424	chr1	36661317	36661801	485	sex-indep (robust)	TAD29_chr1	STAT5_sDHS	sex_indep_static (n=64,584)	not_bound	none	0	0	0	0	WE_194	WE	weak_enhancer	enhancer	chr1	36650175	36650177	-	fam178b	TAD29_chr1	11141	0.00630504	0.00913232	1.44224	1.44224	1	None	none	none	static	static	static	static	static	211122_E12	E12	217992_E11	E11	0	NA	282.42	275	0.04	313.026	519.075
425	chr1	36693478	36693685	208	sex-indep (standard)	TAD29_chr1	none	sex_indep_static (n=64,584)	not_bound	none	0	0	0	0	WE_195	WE	weak_enhancer	enhancer	chr1	36650175	36650177	-	fam178b	TAD29_chr1	43302	0.00630504	0.00913232	1.44224	1.44224	1	None	none	none	none	none	none	none	none	211129_E12	E12	218002_E12	E12	1	NA	26.673	40	-0.58	91.749	42.295
426	chr1	36741041	36741226	186	sex-indep (standard)	TAD29_chr1	STAT5_sDHS	sex_indep_static (n=64,584)	not_bound	none	0	0	0	0	Insul_41	Insul	insulator	insulator	chr1	36740026	36740028	-	fam178b	TAD29_chr1	1014	0.00630504	0.00913232	1.44224	1.44224	1	None	none	none	none	none	none	none	none	211134_E5	E5	218010_E10	E10	0	NA	59.622	86	-0.53	118.734	96.125
427	chr1	36747949	36748922	974	sex-indep (robust)	TAD29_chr1	STAT5_sDHS	sex_indep_static (n=64,584)	not_bound	none	0	0	0	2	Prom_59	Prom	promoter	promoter	chr1	36748331	36748333	+	cox5b	TAD29_chr1	0	89.9261	87.224	1.00466	1.00466	1	sex_indep	none	none	static	static	static	static	static	211142_E7	E7	218016_E7	E7	1	NA	1194.01	1240	-0.05	1403.22	1072.76
428	chr1	36751810	36752057	248	sex-indep (robust)	TAD29_chr1	none	sex_indep_static (n=64,584)	not_bound	none	0	0	0	1	WE_196	WE	weak_enhancer	enhancer	chr1	36748331	36748333	+	cox5b	TAD29_chr1	3478	89.9261	87.224	1.00466	1.00466	1	sex_indep	none	none	none	none	none	none	none	211148_E5	E5	218019_E11	E11	0	NA	83.157	75	0.15	91.749	149.955
429	chr1	36766382	36767120	739	sex-indep (robust)	TAD29_chr1	STAT5_sDHS	sex_indep_static (n=64,584)	not_bound	none	0	0	0	0	Prom_60	Prom	promoter	promoter	chr1	36766768	36766770	-	actr1b	TAD29_chr1	0	10.9118	11.8689	1.12694	1.12694	0.395383	sex_indep	none	none	static	static	static	static	static	211154_E7	E7	218029_E7	E7	1	NA	764.103	812	-0.09	885.108	719.015
430	chr1	36835654	36836029	376	sex-indep (standard)	TAD30_chr1	none	sex_indep_static (n=64,584)	not_bound	none	0	0	0	0	WE_197	WE	weak_enhancer	enhancer	chr1	36835828	36835830	+	zap70	TAD30_chr1	0	1.66549	0.745226	0.459601	-2.1758	2.24823e-08	Female	class_I	IA	none	none	none	none	none	211170_E5	E5	218043_E5	E5	1	NA	31.38	62	-0.98	113.337	84.59
431	chr1	36836426	36836667	242	sex-indep (robust)	TAD30_chr1	none	sex_indep_static (n=64,584)	not_bound	none	0	0	0	0	WE_198	WE	weak_enhancer	enhancer	chr1	36835828	36835830	+	zap70	TAD30_chr1	597	1.66549	0.745226	0.459601	-2.1758	2.24823e-08	Female	class_I	IA	none	none	none	none	none	211170_E5	E5	218043_E5	E5	1	NA	21.966	38	-0.79	70.161	38.45
432	chr1	36837389	36838162	774	sex-indep (robust)	TAD30_chr1	STAT5_sDHS	sex_indep_static (n=64,584)	not_bound	none	0	0	0	3	Enh_87	Enh	enhancer	enhancer	chr1	36835828	36835830	+	zap70	TAD30_chr1	1560	1.66549	0.745226	0.459601	-2.1758	2.24823e-08	Female	class_I	IA	static	static	static	static	static	211171_E6	E6	218045_E7	E7	0	NA	597.789	706	-0.24	464.142	1003.54
433	chr1	36838963	36839718	756	sex-indep (robust)	TAD30_chr1	STAT5_sDHS	sex_indep_static (n=64,584)	not_bound	none	0	0	0	0	WE_199	WE	weak_enhancer	enhancer	chr1	36835828	36835830	+	zap70	TAD30_chr1	3134	1.66549	0.745226	0.459601	-2.1758	2.24823e-08	Female	class_I	IA	none	static	none	none	none	211175_E5	E5	218047_E7	E7	0	NA	208.677	255	-0.29	210.483	457.555
434	chr1	36841571	36841914	344	sex-indep (robust)	TAD30_chr1	STAT5_sDHS	sex_indep_static (n=64,584)	not_bound	none	0	0	0	0	Insul_42	Insul	insulator	insulator	chr1	36835828	36835830	+	zap70	TAD30_chr1	5742	1.66549	0.745226	0.459601	-2.1758	2.24823e-08	Female	class_I	IA	static	static	none	none	none	211177_E5	E5	218050_E5	E5	1	NA	160.038	171	-0.1	167.307	257.615
435	chr1	36896829	36897021	193	sex-indep (standard)	TAD30_chr1	STAT5_sDHS	sex_indep_static (n=64,584)	not_bound	none	0	0	0	0	WE_200	WE	weak_enhancer	enhancer	chr1	36835828	36835830	+	zap70	TAD30_chr1	61000	1.66549	0.745226	0.459601	-2.1758	2.24823e-08	Female	class_I	IA	static	none	none	none	none	211183_E11	E11	218060_E5	E5	0	NA	70.605	57	0.31	91.749	107.66
436	chr1	36918556	36918980	425	sex-indep (robust)	TAD30_chr1	STAT5_sDHS	sex_indep_static (n=64,584)	not_bound	none	0	0	0	2	WE_201	WE	weak_enhancer	enhancer	chr1	36996370	36996372	-	tmem131	TAD30_chr1	77391	2.35738	2.63612	1.15957	1.15957	0.228679	sex_indep	none	none	static	static	none	none	none	211194_E6	E6	218072_E6	E6	1	NA	166.314	165	0.01	199.689	215.32
437	chr1	36931716	36932079	364	sex-indep (robust)	TAD30_chr1	STAT5_sDHS	sex_indep_static (n=64,584)	not_bound	none	0	0	0	0	Insul_43	Insul	insulator	insulator	chr1	36996370	36996372	-	tmem131	TAD30_chr1	64292	2.35738	2.63612	1.15957	1.15957	0.228679	sex_indep	none	none	static	static	none	none	none	211204_E6	E6	218084_E6	E6	1	NA	164.745	179	-0.12	253.659	223.01
438	chr1	36959476	36959673	198	sex-indep (standard)	TAD30_chr1	STAT5_sDHS	sex_indep_static (n=64,584)	not_bound	none	0	0	0	0	WE_202	WE	weak_enhancer	enhancer	chr1	36996370	36996372	-	tmem131	TAD30_chr1	36698	2.35738	2.63612	1.15957	1.15957	0.228679	sex_indep	none	none	static	static	none	none	none	211216_E11	E11	218095_E11	E11	1	NA	42.363	64	-0.6	70.161	96.125
439	chr1	36971418	36971674	257	sex-indep (robust)	TAD30_chr1	STAT5_sDHS	sex_indep_static (n=64,584)	not_bound	none	0	0	0	0	WE_203	WE	weak_enhancer	enhancer	chr1	36996370	36996372	-	tmem131	TAD30_chr1	24697	2.35738	2.63612	1.15957	1.15957	0.228679	sex_indep	none	none	none	static	none	none	static	211224_E10	E10	218106_E11	E11	0	NA	114.537	120	-0.07	113.337	180.715
440	chr1	36977023	36977285	263	sex-indep (robust)	TAD30_chr1	STAT5_sDHS	sex_indep_static (n=64,584)	not_bound	none	0	0	0	0	Enh_88	Enh	enhancer	enhancer	chr1	36996370	36996372	-	tmem131	TAD30_chr1	19086	2.35738	2.63612	1.15957	1.15957	0.228679	sex_indep	none	none	static	static	none	none	none	211228_E6	E6	218109_E6	E6	1	NA	127.089	126	0.01	102.543	157.645
441	chr1	36985785	36986078	294	sex-indep (standard)	TAD30_chr1	STAT5_sDHS	sex_indep_static (n=64,584)	not_bound	none	0	0	0	0	Enh_89	Enh	enhancer	enhancer	chr1	36996370	36996372	-	tmem131	TAD30_chr1	10293	2.35738	2.63612	1.15957	1.15957	0.228679	sex_indep	none	none	static	static	static	static	static	211234_E11	E11	218112_E11	E11	1	NA	94.14	119	-0.34	161.91	242.235
442	chr1	36991677	36991885	209	sex-indep (robust)	TAD30_chr1	none	sex_indep_static (n=64,584)	not_bound	none	0	0	0	0	WE_204	WE	weak_enhancer	enhancer	chr1	36996370	36996372	-	tmem131	TAD30_chr1	4486	2.35738	2.63612	1.15957	1.15957	0.228679	sex_indep	none	none	none	none	none	none	none	211236_E11	E11	218119_E6	E6	0	NA	58.053	84	-0.53	102.543	107.66
443	chr1	36996229	36997090	862	sex-indep (robust)	TAD30_chr1	STAT5_sDHS	sex_indep_static (n=64,584)	not_bound	none	0	0	0	0	Prom_61	Prom	promoter	promoter	chr1	36996370	36996372	-	tmem131	TAD30_chr1	0	2.35738	2.63612	1.15957	1.15957	0.228679	sex_indep	none	none	static	dDHS_open	static	static	static	211240_E7	E7	218124_E7	E7	1	NA	2162.08	2241	-0.05	1727.04	1449.57
444	chr1	37033650	37034126	477	sex-indep (robust)	TAD30_chr1	STAT5_sDHS	sex_indep_static (n=64,584)	STAT5_bound	common	193	121	157	0	WE_205	WE	weak_enhancer	enhancer	chr1	36996370	36996372	-	tmem131	TAD30_chr1	37279	2.35738	2.63612	1.15957	1.15957	0.228679	sex_indep	none	none	static	static	static	static	static	211251_E5	E5	218139_E5	E5	1	NA	665.256	599	0.15	437.157	992.01
445	chr1	37082096	37083509	1414	sex-indep (robust)	TAD30_chr1	STAT5_sDHS	sex_indep_static (n=64,584)	not_bound	none	0	0	0	0	Enh_90	Enh	enhancer	enhancer	chr1	36996370	36996372	-	tmem131	TAD30_chr1	85725	2.35738	2.63612	1.15957	1.15957	0.228679	sex_indep	none	none	static	static	dDHS_close	dDHS_close	dDHS_close	211264_E6	E6	218153_E6	E6	1	NA	1569	2236	-0.51	2444.84	2253.17
446	chr1	37083801	37083964	164	sex-indep (standard)	TAD30_chr1	none	sex_indep_static (n=64,584)	not_bound	none	0	0	0	0	WE_206	WE	weak_enhancer	enhancer	chr1	36996370	36996372	-	tmem131	TAD30_chr1	87430	2.35738	2.63612	1.15957	1.15957	0.228679	sex_indep	none	none	none	none	none	none	none	211266_E6	E6	218154_E9	E9	0	NA	37.656	43	-0.19	59.367	30.76
447	chr1	37097920	37098572	653	sex-indep (robust)	TAD30_chr1	STAT5_sDHS	sex_indep_static (n=64,584)	not_bound	none	0	0	0	0	WE_207	WE	weak_enhancer	enhancer	chr1	36996370	36996372	-	tmem131	TAD30_chr1	101549	2.35738	2.63612	1.15957	1.15957	0.228679	sex_indep	none	none	static	static	static	dDHS_close	static	211276_E6	E6	218165_E6	E6	1	NA	1209.7	1238	-0.03	1689.26	2072.45
448	chr1	37113759	37113918	160	sex-indep (standard)	TAD30_chr1	STAT5_sDHS	sex_indep_static (n=64,584)	not_bound	none	0	0	0	0	WE_208	WE	weak_enhancer	enhancer	chr1	36996370	36996372	-	tmem131	TAD30_chr1	117388	2.35738	2.63612	1.15957	1.15957	0.228679	sex_indep	none	none	none	static	static	none	none	211282_E6	E6	218176_E6	E6	1	NA	81.588	101	-0.31	145.719	126.885
449	chr1	37114079	37114497	419	sex-indep (robust)	TAD30_chr1	STAT5_sDHS	sex_indep_static (n=64,584)	not_bound	none	0	0	0	0	WE_209	WE	weak_enhancer	enhancer	chr1	36996370	36996372	-	tmem131	TAD30_chr1	117708	2.35738	2.63612	1.15957	1.15957	0.228679	sex_indep	none	none	dDHS_open	dDHS_open	static	dDHS_close	dDHS_close	211282_E6	E6	218176_E6	E6	1	NA	302.817	377	-0.32	653.037	396.035
450	chr1	37356367	37357252	886	sex-indep (robust)	TAD31_chr1	STAT5_sDHS	sex_indep_static (n=64,584)	not_bound	none	0	0	0	1	Prom_62	Prom	promoter	promoter	chr1	37356682	37356684	+	inpp4a	TAD31_chr1	0	1.49819	1.7124	1.18269	1.18269	0.212756	sex_indep	none	none	dDHS_close	static	static	static	static	211309_E7	E7	218220_E7	E7	1	NA	1661.57	1586	0.07	1133.37	911.265
451	chr1	37357666	37357827	162	sex-indep (standard)	TAD31_chr1	none	sex_indep_static (n=64,584)	not_bound	none	0	0	0	0	WP_36	WP	weak_promoter	promoter	chr1	37356682	37356684	+	inpp4a	TAD31_chr1	983	1.49819	1.7124	1.18269	1.18269	0.212756	sex_indep	none	none	none	none	none	none	none	211309_E7	E7	218221_E8	E8	0	NA	58.053	66	-0.19	70.161	57.675
452	chr1	37398147	37399097	951	sex-indep (robust)	TAD31_chr1	STAT5_sDHS	sex_indep_static (n=64,584)	STAT5_bound	common	191	99	145	2	Enh_91	Enh	enhancer	enhancer	chr1	37426061	37426063	+	inpp4a	TAD31_chr1	26965	1.49819	1.7124	1.18269	1.18269	0.212756	sex_indep	none	none	static	static	static	static	static	211335_E6	E6	218239_E6	E6	1	NA	858.243	1155	-0.43	782.565	1145.81
453	chr1	37404152	37404680	529	Male (standard)	TAD31_chr1	STAT5_hi_dDHS	male_bias_dynamic (n=834)	not_bound	none	0	0	0	3	Enh_92	Enh	enhancer	enhancer	chr1	37426061	37426063	+	inpp4a	TAD31_chr1	21382	1.49819	1.7124	1.18269	1.18269	0.212756	sex_indep	none	none	dDHS_close	static	dDHS_open	dDHS_open	static	211343_E6	E6	218250_E6	E6	1	1110	894.33	432	1.05	356.202	588.285
454	chr1	37407780	37408500	721	sex-indep (robust)	TAD31_chr1	STAT5_sDHS	sex_indep_static (n=64,584)	not_bound	none	0	0	0	0	Enh_93	Enh	enhancer	enhancer	chr1	37426061	37426063	+	inpp4a	TAD31_chr1	17562	1.49819	1.7124	1.18269	1.18269	0.212756	sex_indep	none	none	static	static	static	static	static	211347_E6	E6	218256_E6	E6	1	NA	1143.8	1247	-0.12	690.816	888.195
455	chr1	37417758	37418075	318	sex-indep (robust)	TAD31_chr1	STAT5_sDHS	sex_indep_static (n=64,584)	not_bound	none	0	0	0	0	WE_210	WE	weak_enhancer	enhancer	chr1	37426061	37426063	+	inpp4a	TAD31_chr1	7987	1.49819	1.7124	1.18269	1.18269	0.212756	sex_indep	none	none	static	static	static	static	static	211354_E6	E6	218266_E6	E6	1	NA	370.284	366	0.02	232.071	384.5
456	chr1	37486354	37487403	1050	sex-indep (robust)	TAD31_chr1	STAT5_sDHS	sex_indep_static (n=64,584)	not_bound	none	0	0	0	0	Prom_63	Prom	promoter	promoter	chr1	37486946	37486948	-	coa5	TAD31_chr1	0	13.8614	14.2778	1.06827	1.06827	0.910968	sex_indep	none	none	static	static	static	static	static	211383_E7	E7	218300_E7	E7	1	NA	1713.35	1915	-0.16	1484.17	1099.67
457	chr1	37597740	37598229	490	sex-indep (standard)	TAD32_chr1	STAT5_sDHS	sex_indep_static (n=64,584)	not_bound	none	0	0	0	0	Insul_44	Insul	insulator	insulator	chr1	37597859	37597861	-	mgat4a	TAD32_chr1	0	0.151521	0.0904235	0.625525	-1.59866	0.124349	None	none	none	none	none	none	none	none	211400_E12	E12	218334_E12	E12	1	NA	136.503	159	-0.22	178.101	107.66
458	chr1	37667942	37668110	169	sex-indep (robust)	TAD32_chr1	STAT5_sDHS	sex_indep_static (n=64,584)	not_bound	none	0	0	0	0	WE_211	WE	weak_enhancer	enhancer	chr1	37597859	37597861	-	mgat4a	TAD32_chr1	70082	0.151521	0.0904235	0.625525	-1.59866	0.124349	None	none	none	static	none	none	none	none	211409_E12	E12	218354_E12	E12	1	NA	61.191	82	-0.42	80.955	49.985
459	chr1	37751466	37751664	199	sex-indep (robust)	TAD33_chr1	none	sex_indep_static (n=64,584)	not_bound	none	0	0	0	0	WE_212	WE	weak_enhancer	enhancer	chr1	37776654	37776656	-	2010300c02rik	TAD33_chr1	24991	0.0102602	0.00919691	0.838131	-1.19313	1	None	none	none	none	none	none	none	none	211418_E1	E1	218364_E12	E12	0	NA	14.121	32	-1.18	48.573	19.225
460	chr1	37921350	37922570	1221	sex-indep (robust)	TAD33_chr1	STAT5_sDHS	sex_indep_static (n=64,584)	not_bound	none	0	0	0	0	Prom_64	Prom	promoter	promoter	chr1	37921925	37921927	-	tsga10	TAD33_chr1	0	0.179807	0.1573	0.922274	-1.08428	1	None	none	none	static	static	static	static	static	211435_E5	E5	218386_E7	E7	0	NA	4466.94	4467	0	6309.09	3929.59
461	chr1	37928592	37929556	965	sex-indep (robust)	TAD33_chr1	STAT5_sDHS	sex_indep_static (n=64,584)	not_bound	none	0	0	0	0	Prom_65	Prom	promoter	promoter	chr1	37929050	37929052	+	lipt1	TAD33_chr1	0	2.5692	2.3011	0.921544	-1.08513	1	sex_indep	none	none	static	static	static	static	static	211442_E7	E7	218394_E7	E7	1	NA	1674.12	1644	0.03	1360.04	1480.33
462	chr1	37934620	37935276	657	sex-indep (robust)	TAD33_chr1	STAT5_sDHS	sex_indep_static (n=64,584)	STAT5_bound	common	194	54	124	0	Enh_94	Enh	enhancer	enhancer	chr1	37929050	37929052	+	lipt1	TAD33_chr1	5569	2.5692	2.3011	0.921544	-1.08513	1	sex_indep	none	none	static	dDHS_close	static	static	static	211450_E6	E6	218403_E6	E6	1	NA	1018.28	1115	-0.13	561.288	1268.85
463	chr1	37946871	37947587	717	sex-indep (robust)	TAD33_chr1	STAT5_sDHS	sex_indep_static (n=64,584)	STAT5_bound	common	746	775	760.5	5	Prom_66	Prom	promoter	promoter	chr1	37947254	37947256	-	mitd1	TAD33_chr1	0	3.49394	2.94583	0.882178	-1.13356	0.951932	sex_indep	none	none	static	static	dDHS_open	dDHS_open	static	211457_E7	E7	218411_E7	E7	1	NA	2008.32	1534	0.39	1273.69	1107.36
464	chr1	38053589	38055554	1966	sex-indep (robust)	TAD33_chr1	STAT5_sDHS	sex_indep_static (n=64,584)	not_bound	none	0	0	0	1	Prom_67	Prom	promoter	promoter	chr1	38054051	38054053	-	txndc9	TAD33_chr1	0	3.87901	3.76489	1.00615	1.00615	1	sex_indep	none	none	static	dDHS_open	static	static	static	211478_E7	E7	218432_E7	E7	1	NA	3454.94	3448	0	3842.66	2506.94
465	chr1	38063723	38063894	172	sex-indep (standard)	TAD33_chr1	STAT5_sDHS	sex_indep_static (n=64,584)	not_bound	none	0	0	0	0	WE_213	WE	weak_enhancer	enhancer	chr1	38054854	38054856	+	eif5b	TAD33_chr1	8868	3.93341	3.90663	1.03089	1.03089	1	sex_indep	none	none	none	none	none	none	none	211486_E9	E9	218443_E11	E11	0	NA	47.07	58	-0.3	91.749	111.505
466	chr1	38166692	38166914	223	sex-indep (robust)	TAD33_chr1	STAT5_sDHS	sex_indep_static (n=64,584)	not_bound	none	0	0	0	0	Enh_95	Enh	enhancer	enhancer	chr1	38186505	38186507	-	rev1	TAD33_chr1	19592	0.953516	1.02936	1.11094	1.11094	0.859182	None	none	none	none	static	none	none	none	211504_E6	E6	218463_E11	E11	0	NA	53.346	74	-0.47	91.749	142.265
467	chr1	38175581	38175719	139	sex-indep (standard)	TAD33_chr1	STAT5_sDHS	sex_indep_static (n=64,584)	not_bound	none	0	0	0	0	Enh_96	Enh	enhancer	enhancer	chr1	38186505	38186507	-	rev1	TAD33_chr1	10787	0.953516	1.02936	1.11094	1.11094	0.859182	None	none	none	static	static	none	none	none	211510_E6	E6	218469_E6	E6	1	NA	119.244	127	-0.09	124.131	169.18
468	chr1	38181205	38181419	215	sex-indep (robust)	TAD33_chr1	STAT5_sDHS	sex_indep_static (n=64,584)	not_bound	none	0	0	0	0	Enh_97	Enh	enhancer	enhancer	chr1	38186505	38186507	-	rev1	TAD33_chr1	5087	0.953516	1.02936	1.11094	1.11094	0.859182	None	none	none	static	static	none	none	none	211514_E6	E6	218476_E6	E6	1	NA	98.847	142	-0.52	140.322	253.77
469	chr1	38185747	38187236	1490	sex-indep (robust)	TAD33_chr1	STAT5_sDHS	sex_indep_static (n=64,584)	not_bound	none	0	0	0	0	Prom_68	Prom	promoter	promoter	chr1	38186505	38186507	-	rev1	TAD33_chr1	0	0.953516	1.02936	1.11094	1.11094	0.859182	None	none	none	dDHS_open	dDHS_open	static	static	static	211521_E7	E7	218486_E7	E7	1	NA	2479.02	2754	-0.15	3988.38	1914.81
470	chr1	38233037	38233279	243	sex-indep (standard)	TAD34_chr1	STAT5_sDHS	sex_indep_static (n=64,584)	not_bound	none	0	0	0	0	WE_214	WE	weak_enhancer	enhancer	chr1	38684087	38684089	-	aff3	TAD34_chr1	450809	0.0650216	0.0290087	0.474865	-2.10586	0.0678512	None	none	none	none	static	none	none	none	211536_E10	E10	218496_E12	E12	0	NA	65.898	146	-1.15	91.749	146.11
471	chr1	38242435	38242644	210	sex-indep (standard)	TAD34_chr1	STAT5_sDHS	sex_indep_static (n=64,584)	not_bound	none	0	0	0	0	Insul_45	Insul	insulator	insulator	chr1	38684087	38684089	-	aff3	TAD34_chr1	441444	0.0650216	0.0290087	0.474865	-2.10586	0.0678512	None	none	none	static	none	none	none	none	211538_E12	E12	218500_E12	E12	1	NA	53.346	75	-0.49	97.146	53.83
473	chr1	38300240	38300364	125	sex-indep (standard)	TAD34_chr1	none	sex_indep_static (n=64,584)	not_bound	none	0	0	0	0	WE_215	WE	weak_enhancer	enhancer	chr1	38684087	38684089	-	aff3	TAD34_chr1	383724	0.0650216	0.0290087	0.474865	-2.10586	0.0678512	None	none	none	none	none	none	none	none	211554_E9	E9	218517_E6	E6	0	NA	20.397	32	-0.65	32.382	23.07
474	chr1	38364786	38365885	1100	sex-indep (robust)	TAD34_chr1	STAT5_sDHS	sex_indep_static (n=64,584)	not_bound	none	0	0	0	0	Enh_98	Enh	enhancer	enhancer	chr1	38684087	38684089	-	aff3	TAD34_chr1	318203	0.0650216	0.0290087	0.474865	-2.10586	0.0678512	None	none	none	static	dDHS_close	static	static	static	211566_E6	E6	218533_E6	E6	1	NA	1929.87	2499	-0.37	1322.27	2972.18
475	chr1	38506302	38506656	355	Male (robust)	TAD34_chr1	STAT5_hi_dDHS	male_bias_dynamic (n=834)	STAT5_bound	male_enriched	377	14	195.5	2	WE_216	WE	weak_enhancer	enhancer	chr1	38684087	38684089	-	aff3	TAD34_chr1	177432	0.0650216	0.0290087	0.474865	-2.10586	0.0678512	None	none	none	dDHS_close	none	dDHS_open	dDHS_open	dDHS_open	211590_E12	E12	218556_E12	E12	1	1111	685.653	354	0.95	102.543	119.195
476	chr1	38535138	38535487	350	sex-indep (standard)	TAD34_chr1	STAT5_sDHS	sex_indep_static (n=64,584)	not_bound	none	0	0	0	4	WE_217	WE	weak_enhancer	enhancer	chr1	38684087	38684089	-	aff3	TAD34_chr1	148601	0.0650216	0.0290087	0.474865	-2.10586	0.0678512	None	none	none	none	static	none	none	none	211594_E1	E1	218560_E12	E12	0	NA	101.985	103	-0.01	129.528	173.025
477	chr1	38918571	38918821	251	Male (less stringent)	TAD34_chr1	STAT5_sDHS	male_bias_static (n=1895)	not_bound	none	0	0	0	0	WE_218	WE	weak_enhancer	enhancer	chr1	38955003	38955005	-	chst10	TAD34_chr1	36183	0.0259379	0.0207006	0.809946	-1.23465	1	None	none	none	static	static	none	none	none	211647_E6	E6	218596_E11	E11	0	NA	111.399	125	-0.17	80.955	96.125
478	chr1	39043923	39045007	1085	sex-indep (robust)	TAD35_chr1	STAT5_sDHS	sex_indep_static (n=64,584)	not_bound	none	0	0	0	0	Prom_69	Prom	promoter	promoter	chr1	39044658	39044660	+	pdcl3	TAD35_chr1	0	4.64009	4.13108	0.927983	-1.07761	1	sex_indep	none	none	static	static	static	static	static	211662_E7	E7	218627_E7	E7	1	NA	2217	2251	-0.02	2552.78	2010.93
479	chr1	39067622	39067820	199	sex-indep (robust)	TAD35_chr1	STAT5_sDHS	sex_indep_static (n=64,584)	not_bound	none	0	0	0	0	Insul_46	Insul	insulator	insulator	chr1	39044658	39044660	+	pdcl3	TAD35_chr1	22963	4.64009	4.13108	0.927983	-1.07761	1	sex_indep	none	none	static	static	none	none	none	211669_E2	E2	218636_E5	E5	0	NA	50.208	89	-0.83	140.322	80.745
480	chr1	39082113	39082285	173	sex-indep (standard)	TAD35_chr1	STAT5_sDHS	sex_indep_static (n=64,584)	not_bound	none	0	0	0	0	Enh_99	Enh	enhancer	enhancer	chr1	39044658	39044660	+	pdcl3	TAD35_chr1	37454	4.64009	4.13108	0.927983	-1.07761	1	sex_indep	none	none	static	static	none	none	none	211670_E12	E12	218640_E12	E12	1	NA	51.777	66	-0.35	124.131	146.11
481	chr1	39124529	39125132	604	sex-indep (robust)	TAD35_chr1	STAT5_sDHS	sex_indep_static (n=64,584)	not_bound	none	0	0	0	0	Enh_100	Enh	enhancer	enhancer	chr1	39044658	39044660	+	pdcl3	TAD35_chr1	79870	4.64009	4.13108	0.927983	-1.07761	1	sex_indep	none	none	dDHS_close	dDHS_close	static	static	static	211681_E12	E12	218656_E6	E6	0	NA	605.634	628	-0.05	626.052	1053.53
482	chr1	39159355	39159735	381	sex-indep (robust)	TAD35_chr1	STAT5_sDHS	sex_indep_static (n=64,584)	not_bound	none	0	0	0	2	Enh_101	Enh	enhancer	enhancer	chr1	39243835	39243837	-	mir6349	TAD35_chr1	84101	0	0	1	1	1	None	none	none	dDHS_close	dDHS_close	static	static	static	211699_E11	E11	218671_E5	E5	0	NA	450.303	411	0.13	275.247	745.93
483	chr1	39162427	39162878	452	sex-indep (robust)	TAD35_chr1	STAT5_sDHS	sex_indep_static (n=64,584)	not_bound	none	0	0	0	0	WE_219	WE	weak_enhancer	enhancer	chr1	39243835	39243837	-	mir6349	TAD35_chr1	80958	0	0	1	1	1	None	none	none	static	dDHS_close	none	none	none	211702_E9	E9	218676_E6	E6	0	NA	335.766	429	-0.35	242.865	730.55
484	chr1	39189974	39190127	154	Male (standard)	TAD35_chr1	STAT5_sDHS	male_bias_static (n=1895)	not_bound	none	0	0	0	0	WE_220	WE	weak_enhancer	enhancer	chr1	39243835	39243837	-	mir6349	TAD35_chr1	53709	0	0	1	1	1	None	none	none	static	none	none	none	none	211708_E12	E12	218679_E2	E2	0	NA	67.467	81	-0.26	26.985	49.985
485	chr1	39200532	39200825	294	sex-indep (robust)	TAD35_chr1	STAT5_sDHS	sex_indep_static (n=64,584)	not_bound	none	0	0	0	0	WE_221	WE	weak_enhancer	enhancer	chr1	39243835	39243837	-	mir6349	TAD35_chr1	43011	0	0	1	1	1	None	none	none	static	static	static	static	static	211711_E11	E11	218682_E12	E12	0	NA	144.348	125	0.21	118.734	215.32
486	chr1	39213626	39213916	291	Female (standard)	TAD35_chr1	STAT5_sDHS	female_bias_static (n=1359)	STAT5_bound	female_enriched	21	50	35.5	0	WE_222	WE	weak_enhancer	enhancer	chr1	39243835	39243837	-	mir6349	TAD35_chr1	29920	0	0	1	1	1	None	none	none	static	static	none	none	none	211713_E12	E12	218684_E12	E12	1	NA	83.157	81	0.04	70.161	269.15
488	chr1	39249163	39250112	950	sex-indep (robust)	TAD35_chr1	STAT5_sDHS	sex_indep_static (n=64,584)	STAT5_bound	common	85	87	86	3	WP_37	WP	weak_promoter	promoter	chr1	39251116	39251118	+	npas2	TAD35_chr1	1005	0.984547	0.623985	0.653118	-1.53112	0.0345129	Female	class_I	IB	dDHS_close	dDHS_close	static	static	static	211722_E7	E7	218695_E6	E6	0	NA	1161.06	1129	0.04	642.243	1730.25
489	chr1	39341656	39341937	282	sex-indep (robust)	TAD35_chr1	STAT5_sDHS	sex_indep_static (n=64,584)	STAT5_bound	female_enriched	83	430	256.5	1	WE_223	WE	weak_enhancer	enhancer	chr1	39251116	39251118	+	npas2	TAD35_chr1	90539	0.984547	0.623985	0.653118	-1.53112	0.0345129	Female	class_I	IB	static	static	none	none	none	211731_E5	E5	218720_E11	E11	0	NA	84.726	74	0.2	97.146	311.445
490	chr1	39345350	39345603	254	sex-indep (robust)	TAD35_chr1	STAT5_sDHS	sex_indep_static (n=64,584)	STAT5_bound	female_enriched	46	86	66	0	WE_224	WE	weak_enhancer	enhancer	chr1	39251116	39251118	+	npas2	TAD35_chr1	94233	0.984547	0.623985	0.653118	-1.53112	0.0345129	Female	class_I	IB	static	dDHS_close	none	none	none	211734_E12	E12	218721_E6	E6	0	NA	136.503	122	0.16	129.528	469.09
491	chr1	39359195	39359468	274	sex-indep (standard)	TAD35_chr1	STAT5_sDHS	sex_indep_static (n=64,584)	not_bound	none	0	0	0	0	WE_225	WE	weak_enhancer	enhancer	chr1	39251116	39251118	+	npas2	TAD35_chr1	108078	0.984547	0.623985	0.653118	-1.53112	0.0345129	Female	class_I	IB	static	static	none	none	none	211737_E5	E5	218727_E11	E11	0	NA	101.985	52	0.97	129.528	253.77
492	chr1	39370275	39370450	176	sex-indep (standard)	TAD35_chr1	STAT5_sDHS	sex_indep_static (n=64,584)	not_bound	none	0	0	0	0	WE_226	WE	weak_enhancer	enhancer	chr1	39251116	39251118	+	npas2	TAD35_chr1	119158	0.984547	0.623985	0.653118	-1.53112	0.0345129	Female	class_I	IB	static	static	none	none	none	211740_E11	E11	218729_E11	E11	1	NA	75.312	58	0.38	59.367	130.73
493	chr1	39374827	39375106	280	sex-indep (robust)	TAD35_chr1	STAT5_sDHS	sex_indep_static (n=64,584)	STAT5_bound	female_enriched	85	108	96.5	1	WE_227	WE	weak_enhancer	enhancer	chr1	39251116	39251118	+	npas2	TAD35_chr1	123710	0.984547	0.623985	0.653118	-1.53112	0.0345129	Female	class_I	IB	static	static	none	none	none	211743_E6	E6	218733_E6	E6	1	NA	109.83	132	-0.27	151.116	346.05
494	chr1	39382221	39382378	158	sex-indep (standard)	TAD35_chr1	STAT5_sDHS	sex_indep_static (n=64,584)	not_bound	none	0	0	0	0	WE_228	WE	weak_enhancer	enhancer	chr1	39251116	39251118	+	npas2	TAD35_chr1	131104	0.984547	0.623985	0.653118	-1.53112	0.0345129	Female	class_I	IB	static	static	none	none	static	211749_E6	E6	218739_E6	E6	1	NA	64.329	79	-0.3	48.573	180.715
495	chr1	39424412	39425398	987	sex-indep (robust)	TAD36_chr1	STAT5_sDHS	sex_indep_static (n=64,584)	not_bound	none	0	0	0	2	Prom_70	Prom	promoter	promoter	chr1	39424695	39424697	+	rpl31	TAD36_chr1	0	51.0477	51.331	1.04231	1.04231	1	sex_indep	none	none	static	static	static	static	static	211759_E7	E7	218763_E7	E7	1	NA	549.15	722	-0.39	669.228	557.525
496	chr1	39449168	39449293	126	sex-indep (standard)	TAD36_chr1	STAT5_sDHS	sex_indep_static (n=64,584)	not_bound	none	0	0	0	0	Insul_47	Insul	insulator	insulator	chr1	39424695	39424697	+	rpl31	TAD36_chr1	24472	51.0477	51.331	1.04231	1.04231	1	sex_indep	none	none	static	none	none	none	none	211765_E13	E13	218771_E13	E13	1	NA	39.225	41	-0.06	70.161	57.675
497	chr1	39474743	39474964	222	sex-indep (robust)	TAD36_chr1	none	sex_indep_static (n=64,584)	not_bound	none	0	0	0	0	Insul_48	Insul	insulator	insulator	chr1	39424695	39424697	+	rpl31	TAD36_chr1	50047	51.0477	51.331	1.04231	1.04231	1	sex_indep	none	none	none	none	none	none	none	211775_E5	E5	218786_E5	E5	1	NA	34.518	38	-0.14	80.955	34.605
498	chr1	39482281	39482891	611	sex-indep (robust)	TAD36_chr1	STAT5_sDHS	sex_indep_static (n=64,584)	STAT5_bound	common	179	158	168.5	0	WE_229	WE	weak_enhancer	enhancer	chr1	39535590	39535592	-	tbc1d8	TAD36_chr1	52700	1.92309	1.22848	0.664058	-1.50589	0.0001701	Female	no_response	none	static	dDHS_close	static	static	static	211781_E6	E6	218794_E6	E6	1	NA	615.048	460	0.42	512.715	949.715
499	chr1	39490814	39491050	237	sex-indep (standard)	TAD36_chr1	STAT5_sDHS	sex_indep_static (n=64,584)	STAT5_bound	common	248	270	259	0	WP_38	WP	weak_promoter	promoter	chr1	39535590	39535592	-	tbc1d8	TAD36_chr1	44541	1.92309	1.22848	0.664058	-1.50589	0.0001701	Female	no_response	none	dDHS_close	static	static	static	static	211786_E6	E6	218801_E6	E6	1	NA	180.435	142	0.35	107.94	207.63
500	chr1	39491214	39491664	451	sex-indep (robust)	TAD36_chr1	STAT5_sDHS	sex_indep_static (n=64,584)	STAT5_bound	common	248	270	259	0	Prom_71	Prom	promoter	promoter	chr1	39535590	39535592	-	tbc1d8	TAD36_chr1	43927	1.92309	1.22848	0.664058	-1.50589	0.0001701	Female	no_response	none	dDHS_close	static	static	static	static	211788_E7	E7	218803_E7	E7	1	NA	853.536	608	0.49	442.554	692.1
501	chr1	39502636	39502954	319	sex-indep (robust)	TAD36_chr1	STAT5_sDHS	sex_indep_static (n=64,584)	STAT5_bound	common	97	43	70	0	Enh_102	Enh	enhancer	enhancer	chr1	39535590	39535592	-	tbc1d8	TAD36_chr1	32637	1.92309	1.22848	0.664058	-1.50589	0.0001701	Female	no_response	none	static	static	static	static	static	211796_E6	E6	218809_E6	E6	1	NA	174.159	168	0.05	280.644	203.785
502	chr1	39509123	39509408	286	Female (robust)	TAD36_chr1	STAT5_sDHS	female_bias_static (n=1359)	STAT5_bound	female_enriched	42	97	69.5	0	WE_230	WE	weak_enhancer	enhancer	chr1	39535590	39535592	-	tbc1d8	TAD36_chr1	26183	1.92309	1.22848	0.664058	-1.50589	0.0001701	Female	no_response	none	dDHS_open	static	static	static	static	211803_E6	E6	218815_E6	E6	1	NA	92.571	95	-0.04	291.438	230.7
503	chr1	39514904	39515666	763	sex-indep (robust)	TAD36_chr1	STAT5_sDHS	sex_indep_static (n=64,584)	STAT5_bound	common	342	316	329	2	Enh_103	Enh	enhancer	enhancer	chr1	39535590	39535592	-	tbc1d8	TAD36_chr1	19925	1.92309	1.22848	0.664058	-1.50589	0.0001701	Female	no_response	none	static	static	static	static	static	211809_E6	E6	218819_E7	E7	0	NA	1427.79	1236	0.21	1473.38	1837.91
504	chr1	39534848	39535965	1118	sex-indep (robust)	TAD36_chr1	STAT5_sDHS	sex_indep_static (n=64,584)	not_bound	none	0	0	0	0	Prom_72	Prom	promoter	promoter	chr1	39535590	39535592	-	tbc1d8	TAD36_chr1	0	1.92309	1.22848	0.664058	-1.50589	0.0001701	Female	no_response	none	static	static	static	static	static	211821_E7	E7	218834_E7	E7	1	NA	942.969	1080	-0.2	1111.78	753.62
505	chr1	39572234	39572706	473	sex-indep (standard)	TAD36_chr1	STAT5_sDHS	sex_indep_static (n=64,584)	STAT5_bound	common	160	106	133	0	Enh_104	Enh	enhancer	enhancer	chr1	39592646	39592648	+	cnot11	TAD36_chr1	19941	3.6181	3.49753	0.996338	-1.00368	1	sex_indep	none	none	static	static	none	none	static	211836_E9	E9	218852_E6	E6	0	NA	246.333	243	0.02	242.865	234.545
506	chr1	39576297	39576470	174	sex-indep (standard)	TAD36_chr1	none	sex_indep_static (n=64,584)	not_bound	none	0	0	0	0	WE_231	WE	weak_enhancer	enhancer	chr1	39592646	39592648	+	cnot11	TAD36_chr1	16177	3.6181	3.49753	0.996338	-1.00368	1	sex_indep	none	none	none	none	none	none	none	211839_E13	E13	218854_E13	E13	1	NA	4.707	6	-0.35	37.779	19.225
507	chr1	39584320	39584617	298	sex-indep (standard)	TAD36_chr1	STAT5_sDHS	sex_indep_static (n=64,584)	not_bound	none	0	0	0	0	Insul_49	Insul	insulator	insulator	chr1	39592646	39592648	+	cnot11	TAD36_chr1	8030	3.6181	3.49753	0.996338	-1.00368	1	sex_indep	none	none	static	none	none	none	none	211839_E13	E13	218857_E5	E5	0	NA	62.76	94	-0.58	107.94	96.125
508	chr1	39587101	39587386	286	sex-indep (standard)	TAD36_chr1	STAT5_sDHS	sex_indep_static (n=64,584)	not_bound	none	0	0	0	0	Insul_50	Insul	insulator	insulator	chr1	39592646	39592648	+	cnot11	TAD36_chr1	5261	3.6181	3.49753	0.996338	-1.00368	1	sex_indep	none	none	none	none	none	none	none	211840_E5	E5	218860_E12	E12	0	NA	134.934	152	-0.17	118.734	165.335
509	chr1	39592148	39593124	977	sex-indep (robust)	TAD36_chr1	STAT5_sDHS	sex_indep_static (n=64,584)	not_bound	none	0	0	0	5	Prom_73	Prom	promoter	promoter	chr1	39592646	39592648	+	cnot11	TAD36_chr1	0	3.6181	3.49753	0.996338	-1.00368	1	sex_indep	none	none	static	dDHS_open	static	static	static	211845_E7	E7	218867_E7	E7	1	NA	1313.25	1423	-0.12	1397.82	992.01
510	chr1	39594348	39594800	453	sex-indep (standard)	TAD36_chr1	STAT5_sDHS	sex_indep_static (n=64,584)	not_bound	none	0	0	0	0	Enh_105	Enh	enhancer	enhancer	chr1	39592646	39592648	+	cnot11	TAD36_chr1	1701	3.6181	3.49753	0.996338	-1.00368	1	sex_indep	none	none	static	static	none	none	none	211847_E11	E11	218870_E6	E6	0	NA	194.556	272	-0.48	275.247	399.88
511	chr1	39633348	39634687	1340	sex-indep (robust)	TAD37_chr1	STAT5_sDHS	sex_indep_static (n=64,584)	not_bound	none	0	0	0	1	WP_39	WP	weak_promoter	promoter	chr1	39634190	39634192	-	rnf149	TAD37_chr1	0	20.6777	19.15	0.962119	-1.03937	1	sex_indep	none	none	static	static	static	static	static	211860_E7	E7	218885_E7	E7	1	NA	1945.56	2098	-0.11	2255.95	1972.48
512	chr1	39635315	39635615	301	sex-indep (robust)	TAD37_chr1	STAT5_sDHS	sex_indep_static (n=64,584)	not_bound	none	0	0	0	0	Enh_106	Enh	enhancer	enhancer	chr1	39634190	39634192	-	rnf149	TAD37_chr1	1124	20.6777	19.15	0.962119	-1.03937	1	sex_indep	none	none	static	none	none	none	none	211864_E6	E6	218891_E6	E6	1	NA	252.609	233	0.12	178.101	288.375
513	chr1	39648480	39649399	920	sex-indep (robust)	TAD37_chr1	STAT5_sDHS	sex_indep_static (n=64,584)	not_bound	none	0	0	0	0	Prom_74	Prom	promoter	promoter	chr1	39649147	39649149	+	nc_inter_c1_161	TAD37_chr1	0	2.37946	2.83565	1.16997	1.16997	0.619145	sex_indep	none	none	static	static	static	static	static	211877_E7	E7	218904_E6	E6	0	NA	1044.95	1275	-0.29	1354.65	1318.84
514	chr1	39655634	39655927	294	sex-indep (robust)	TAD37_chr1	STAT5_sDHS	sex_indep_static (n=64,584)	not_bound	none	0	0	0	0	WE_232	WE	weak_enhancer	enhancer	chr1	39649147	39649149	+	nc_inter_c1_161	TAD37_chr1	6486	2.37946	2.83565	1.16997	1.16997	0.619145	sex_indep	none	none	static	static	none	none	static	211884_E6	E6	218912_E6	E6	1	NA	136.503	205	-0.59	107.94	322.98
515	chr1	39665130	39665662	533	sex-indep (robust)	TAD37_chr1	STAT5_sDHS	sex_indep_static (n=64,584)	not_bound	none	0	0	0	0	Enh_107	Enh	enhancer	enhancer	chr1	39649147	39649149	+	nc_inter_c1_161	TAD37_chr1	15982	2.37946	2.83565	1.16997	1.16997	0.619145	sex_indep	none	none	static	static	static	static	dDHS_close	211891_E7	E7	218922_E6	E6	0	NA	811.173	1040	-0.36	1030.83	876.66
516	chr1	39665955	39666093	139	sex-indep (standard)	TAD37_chr1	STAT5_sDHS	sex_indep_static (n=64,584)	not_bound	none	0	0	0	0	WE_233	WE	weak_enhancer	enhancer	chr1	39649147	39649149	+	nc_inter_c1_161	TAD37_chr1	16807	2.37946	2.83565	1.16997	1.16997	0.619145	sex_indep	none	none	static	static	static	static	none	211892_E6	E6	218922_E6	E6	1	NA	89.433	143	-0.68	124.131	99.97
517	chr1	39669462	39669696	235	sex-indep (standard)	TAD37_chr1	STAT5_sDHS	sex_indep_static (n=64,584)	not_bound	none	0	0	0	0	WE_234	WE	weak_enhancer	enhancer	chr1	39649147	39649149	+	nc_inter_c1_161	TAD37_chr1	20314	2.37946	2.83565	1.16997	1.16997	0.619145	sex_indep	none	none	none	none	none	none	none	211897_E6	E6	218930_E6	E6	1	NA	185.142	164	0.17	194.292	211.475
518	chr1	39767490	39767730	241	sex-indep (standard)	TAD37_chr1	none	sex_indep_static (n=64,584)	not_bound	none	0	0	0	1	WE_235	WE	weak_enhancer	enhancer	chr1	39777832	39777834	-	rfx8	TAD37_chr1	10103	0.0189608	0.0141885	0.789912	-1.26596	1	None	none	none	none	none	none	none	none	211914_E5	E5	218948_E5	E5	1	NA	47.07	47	0	102.543	61.52
519	chr1	39770647	39771511	865	sex-indep (robust)	TAD37_chr1	STAT5_sDHS	sex_indep_static (n=64,584)	not_bound	none	0	0	0	1	WE_236	WE	weak_enhancer	enhancer	chr1	39777832	39777834	-	rfx8	TAD37_chr1	6322	0.0189608	0.0141885	0.789912	-1.26596	1	None	none	none	dDHS_open	static	static	static	static	211918_E5	E5	218952_E5	E5	1	NA	830.001	819	0.02	1397.82	1057.38
520	chr1	39791066	39791518	453	sex-indep (robust)	TAD37_chr1	STAT5_sDHS	sex_indep_static (n=64,584)	not_bound	none	0	0	0	1	WE_237	WE	weak_enhancer	enhancer	chr1	39777832	39777834	-	rfx8	TAD37_chr1	13233	0.0189608	0.0141885	0.789912	-1.26596	1	None	none	none	none	none	none	none	none	211925_E5	E5	218963_E12	E12	0	NA	133.365	111	0.26	221.277	99.97
521	chr1	39792737	39793398	662	sex-indep (robust)	TAD37_chr1	STAT5_sDHS	sex_indep_static (n=64,584)	not_bound	none	0	0	0	0	WE_238	WE	weak_enhancer	enhancer	chr1	39777832	39777834	-	rfx8	TAD37_chr1	14904	0.0189608	0.0141885	0.789912	-1.26596	1	None	none	none	static	static	static	static	static	211927_E5	E5	218965_E5	E5	1	NA	382.836	382	0	572.082	311.445
522	chr1	39818227	39818583	357	sex-indep (robust)	TAD37_chr1	STAT5_sDHS	sex_indep_static (n=64,584)	not_bound	none	0	0	0	0	Insul_51	Insul	insulator	insulator	chr1	39777832	39777834	-	rfx8	TAD37_chr1	40394	0.0189608	0.0141885	0.789912	-1.26596	1	None	none	none	static	none	static	static	static	211941_E12	E12	218975_E12	E12	1	NA	111.399	121	-0.12	275.247	153.8
523	chr1	39818828	39819184	357	sex-indep (robust)	TAD37_chr1	STAT5_sDHS	sex_indep_static (n=64,584)	not_bound	none	0	0	0	0	Insul_52	Insul	insulator	insulator	chr1	39777832	39777834	-	rfx8	TAD37_chr1	40995	0.0189608	0.0141885	0.789912	-1.26596	1	None	none	none	static	static	static	static	static	211941_E12	E12	218975_E12	E12	1	NA	182.004	200	-0.14	415.569	223.01
524	chr1	39869985	39870285	301	sex-indep (robust)	TAD37_chr1	STAT5_sDHS	sex_indep_static (n=64,584)	STAT5_bound	female_enriched	43	101	72	0	WE_239	WE	weak_enhancer	enhancer	chr1	39862175	39862177	-	gm3646	TAD37_chr1	7809	0	0	1	1	1	None	none	none	static	dDHS_close	none	none	none	211953_E12	E12	218988_E12	E12	1	NA	172.59	267	-0.63	140.322	595.975
525	chr1	39925797	39926985	1189	sex-indep (robust)	TAD37_chr1	STAT5_sDHS	sex_indep_static (n=64,584)	not_bound	none	0	0	0	0	Enh_108	Enh	enhancer	enhancer	chr1	39904173	39904175	-	1700066b17rik	TAD37_chr1	21623	0	0	1	1	1	None	none	none	static	static	none	none	none	211960_E12	E12	218996_E6	E6	0	NA	607.203	514	0.24	577.479	1157.35
526	chr1	39957448	39957796	349	sex-indep (robust)	TAD37_chr1	none	sex_indep_static (n=64,584)	not_bound	none	0	0	0	0	WE_240	WE	weak_enhancer	enhancer	chr1	39957757	39957759	+	map4k4	TAD37_chr1	0	1.29307	0.886261	0.715518	-1.39759	0.00332195	None	none	none	none	none	none	none	none	211965_E5	E5	219004_E5	E5	1	NA	123.951	121	0.03	221.277	96.125
527	chr1	39959567	39960194	628	sex-indep (robust)	TAD37_chr1	STAT5_sDHS	sex_indep_static (n=64,584)	STAT5_bound	common	136	134	135	0	Enh_109	Enh	enhancer	enhancer	chr1	39957757	39957759	+	map4k4	TAD37_chr1	1809	1.29307	0.886261	0.715518	-1.39759	0.00332195	None	none	none	static	static	static	static	static	211968_E12	E12	219008_E12	E12	1	NA	677.808	608	0.16	895.902	1630.28
528	chr1	39968395	39968533	139	sex-indep (standard)	TAD37_chr1	STAT5_sDHS	sex_indep_static (n=64,584)	not_bound	none	0	0	0	0	Insul_53	Insul	insulator	insulator	chr1	39957757	39957759	+	map4k4	TAD37_chr1	10637	1.29307	0.886261	0.715518	-1.39759	0.00332195	None	none	none	static	none	none	none	none	211974_E2	E2	219017_E11	E11	0	NA	18.828	36	-0.94	48.573	26.915
529	chr1	39993176	39993677	502	sex-indep (robust)	TAD37_chr1	STAT5_sDHS	sex_indep_static (n=64,584)	not_bound	none	0	0	0	0	Insul_54	Insul	insulator	insulator	chr1	39957757	39957759	+	map4k4	TAD37_chr1	35418	1.29307	0.886261	0.715518	-1.39759	0.00332195	None	none	none	static	static	static	static	static	211986_E7	E7	219033_E12	E12	0	NA	513.063	538	-0.07	545.097	457.555
530	chr1	40007127	40007278	152	sex-indep (standard)	TAD37_chr1	none	sex_indep_static (n=64,584)	not_bound	none	0	0	0	0	WE_241	WE	weak_enhancer	enhancer	chr1	39957757	39957759	+	map4k4	TAD37_chr1	49369	1.29307	0.886261	0.715518	-1.39759	0.00332195	None	none	none	none	none	none	none	none	211994_E11	E11	219039_E12	E12	0	NA	17.259	30	-0.8	37.779	11.535
531	chr1	40056666	40057183	518	sex-indep (robust)	TAD37_chr1	STAT5_sDHS	sex_indep_static (n=64,584)	not_bound	none	0	0	0	0	Insul_55	Insul	insulator	insulator	chr1	40141612	40141614	+	il1r2	TAD37_chr1	84430	0.0152471	0.0335245	2.31002	2.31002	1	None	none	none	none	static	none	none	none	212004_E5	E5	219050_E11	E11	0	NA	92.571	142	-0.62	183.498	280.685
532	chr1	40068473	40068869	397	sex-indep (standard)	TAD37_chr1	STAT5_sDHS	sex_indep_static (n=64,584)	not_bound	none	0	0	0	2	WE_242	WE	weak_enhancer	enhancer	chr1	40141612	40141614	+	il1r2	TAD37_chr1	72744	0.0152471	0.0335245	2.31002	2.31002	1	None	none	none	none	none	none	none	none	212006_E2	E2	219052_E5	E5	0	NA	69.036	66	0.06	107.94	49.985
533	chr1	40142587	40142797	211	sex-indep (standard)	TAD37_chr1	STAT5_sDHS	sex_indep_static (n=64,584)	not_bound	none	0	0	0	0	Insul_56	Insul	insulator	insulator	chr1	40142694	40142696	-	gm16894	TAD37_chr1	0	0	0	1	1	1	None	none	none	static	none	none	none	none	212018_E8	E8	219057_E12	E12	0	NA	89.433	106	-0.25	118.734	84.59
534	chr1	40172245	40172547	303	sex-indep (robust)	TAD38_chr1	STAT5_sDHS	sex_indep_static (n=64,584)	not_bound	none	0	0	0	0	Insul_57	Insul	insulator	insulator	chr1	40278298	40278300	+	nc_inter_c1_169	TAD38_chr1	105752	0.776434	0.397562	0.506896	-1.97279	0.0406607	None	none	none	static	none	none	none	none	212024_E5	E5	219060_E10	E10	0	NA	203.97	187	0.13	167.307	149.955
535	chr1	40173320	40173585	266	sex-indep (robust)	TAD38_chr1	STAT5_sDHS	sex_indep_static (n=64,584)	not_bound	none	0	0	0	0	Insul_58	Insul	insulator	insulator	chr1	40278298	40278300	+	nc_inter_c1_169	TAD38_chr1	104714	0.776434	0.397562	0.506896	-1.97279	0.0406607	None	none	none	static	static	none	none	none	212027_E6	E6	219060_E10	E10	0	NA	114.537	126	-0.14	118.734	107.66
536	chr1	40174499	40174994	496	sex-indep (robust)	TAD38_chr1	STAT5_sDHS	sex_indep_static (n=64,584)	not_bound	none	0	0	0	0	WE_243	WE	weak_enhancer	enhancer	chr1	40278298	40278300	+	nc_inter_c1_169	TAD38_chr1	103305	0.776434	0.397562	0.506896	-1.97279	0.0406607	None	none	none	static	none	static	static	static	212030_E5	E5	219061_E5	E5	1	NA	210.246	157	0.42	194.292	211.475
537	chr1	40189619	40189913	295	sex-indep (standard)	TAD38_chr1	STAT5_sDHS	sex_indep_static (n=64,584)	not_bound	none	0	0	0	0	WE_244	WE	weak_enhancer	enhancer	chr1	40278298	40278300	+	nc_inter_c1_169	TAD38_chr1	88386	0.776434	0.397562	0.506896	-1.97279	0.0406607	None	none	none	static	none	none	none	none	212032_E10	E10	219066_E11	E11	0	NA	134.934	98	0.46	59.367	146.11
538	chr1	40196701	40197010	310	sex-indep (standard)	TAD38_chr1	STAT5_sDHS	sex_indep_static (n=64,584)	not_bound	none	0	0	0	1	WE_245	WE	weak_enhancer	enhancer	chr1	40278298	40278300	+	nc_inter_c1_169	TAD38_chr1	81289	0.776434	0.397562	0.506896	-1.97279	0.0406607	None	none	none	none	static	none	none	none	212034_E5	E5	219070_E11	E11	0	NA	84.726	100	-0.24	183.498	138.42
539	chr1	40206152	40206369	218	sex-indep (standard)	TAD38_chr1	STAT5_sDHS	sex_indep_static (n=64,584)	not_bound	none	0	0	0	0	WE_246	WE	weak_enhancer	enhancer	chr1	40278298	40278300	+	nc_inter_c1_169	TAD38_chr1	71930	0.776434	0.397562	0.506896	-1.97279	0.0406607	None	none	none	none	static	none	none	none	212036_E5	E5	219072_E11	E11	0	NA	72.174	61	0.24	37.779	103.815
540	chr1	40212622	40213696	1075	sex-indep (robust)	TAD38_chr1	STAT5_sDHS	sex_indep_static (n=64,584)	STAT5_bound	common	472	218	345	1	Enh_110	Enh	enhancer	enhancer	chr1	40278298	40278300	+	nc_inter_c1_169	TAD38_chr1	64603	0.776434	0.397562	0.506896	-1.97279	0.0406607	None	none	none	dDHS_close	static	static	static	static	212040_E6	E6	219078_E6	E6	1	NA	1206.56	985	0.29	480.333	1018.92
541	chr1	40217750	40218397	648	sex-indep (robust)	TAD38_chr1	none	sex_indep_static (n=64,584)	not_bound	none	0	0	0	0	WE_247	WE	weak_enhancer	enhancer	chr1	40278298	40278300	+	nc_inter_c1_169	TAD38_chr1	59902	0.776434	0.397562	0.506896	-1.97279	0.0406607	None	none	none	none	none	none	none	none	212044_E6	E6	219082_E6	E6	1	NA	202.401	295	-0.54	237.468	399.88
542	chr1	40219922	40220754	833	sex-indep (robust)	TAD38_chr1	STAT5_hi_dDHS	sex_indep_dynamic (n=1532)	STAT5_bound	common	465	186	325.5	4	Enh_111	Enh	enhancer	enhancer	chr1	40278298	40278300	+	nc_inter_c1_169	TAD38_chr1	57545	0.776434	0.397562	0.506896	-1.97279	0.0406607	None	none	none	dDHS_close	static	dDHS_open	dDHS_open	static	212046_E6	E6	219084_E6	E6	1	1110	1857.7	852	1.12	512.715	1522.62
543	chr1	40220879	40221705	827	sex-indep (robust)	TAD38_chr1	STAT5_hi_dDHS	sex_indep_dynamic (n=1532)	STAT5_bound	common	465	186	325.5	2	Enh_112	Enh	enhancer	enhancer	chr1	40278298	40278300	+	nc_inter_c1_169	TAD38_chr1	56594	0.776434	0.397562	0.506896	-1.97279	0.0406607	None	none	none	dDHS_close	static	dDHS_open	static	static	212048_E6	E6	219084_E6	E6	1	1100	1007.3	809	0.32	512.715	1003.54
544	chr1	40224425	40224571	147	sex-indep (standard)	TAD38_chr1	none	sex_indep_static (n=64,584)	not_bound	none	0	0	0	0	WE_248	WE	weak_enhancer	enhancer	chr1	40278298	40278300	+	nc_inter_c1_169	TAD38_chr1	53728	0.776434	0.397562	0.506896	-1.97279	0.0406607	None	none	none	none	none	none	none	none	212051_E6	E6	219087_E9	E9	0	NA	34.518	33	0.06	43.176	15.38
545	chr1	40228680	40229412	733	sex-indep (robust)	TAD38_chr1	STAT5_hi_dDHS	sex_indep_dynamic (n=1532)	STAT5_bound	common	318	158	238	3	WE_249	WE	weak_enhancer	enhancer	chr1	40278298	40278300	+	nc_inter_c1_169	TAD38_chr1	48887	0.776434	0.397562	0.506896	-1.97279	0.0406607	None	none	none	dDHS_close	static	static	dDHS_open	static	212059_E6	E6	219091_E6	E6	1	1010	1895.35	444	2.09	485.73	515.23
546	chr1	40231732	40233173	1442	sex-indep (robust)	TAD38_chr1	STAT5_hi_dDHS	sex_indep_dynamic (n=1532)	not_bound	none	0	0	0	6	WE_250	WE	weak_enhancer	enhancer	chr1	40278298	40278300	+	nc_inter_c1_169	TAD38_chr1	45126	0.776434	0.397562	0.506896	-1.97279	0.0406607	None	none	none	dDHS_close	dDHS_close	static	static	static	212062_E6	E6	219095_E6	E6	1	1000	2435.09	1761	0.47	701.61	1903.28
547	chr1	40236332	40236959	628	sex-indep (robust)	TAD38_chr1	STAT5_sDHS	sex_indep_static (n=64,584)	not_bound	none	0	0	0	2	Enh_113	Enh	enhancer	enhancer	chr1	40278298	40278300	+	nc_inter_c1_169	TAD38_chr1	41340	0.776434	0.397562	0.506896	-1.97279	0.0406607	None	none	none	static	static	static	static	static	212066_E6	E6	219099_E6	E6	1	NA	428.337	411	0.06	388.584	496.005
548	chr1	40237781	40238014	234	sex-indep (robust)	TAD38_chr1	STAT5_sDHS	sex_indep_static (n=64,584)	not_bound	none	0	0	0	0	Enh_114	Enh	enhancer	enhancer	chr1	40278298	40278300	+	nc_inter_c1_169	TAD38_chr1	40285	0.776434	0.397562	0.506896	-1.97279	0.0406607	None	none	none	static	static	none	none	none	212070_E6	E6	219101_E6	E6	1	NA	156.9	163	-0.06	102.543	215.32
549	chr1	40244687	40245231	545	Male (robust)	TAD38_chr1	STAT5_hi_dDHS	male_bias_dynamic (n=834)	not_bound	none	0	0	0	0	WE_251	WE	weak_enhancer	enhancer	chr1	40278298	40278300	+	nc_inter_c1_169	TAD38_chr1	33068	0.776434	0.397562	0.506896	-1.97279	0.0406607	None	none	none	dDHS_close	static	dDHS_open	dDHS_open	static	212075_E6	E6	219106_E9	E9	0	1110	833.139	349	1.26	178.101	157.645
550	chr1	40274431	40274700	270	sex-indep (robust)	TAD38_chr1	STAT5_sDHS	sex_indep_static (n=64,584)	not_bound	none	0	0	0	0	WE_252	WE	weak_enhancer	enhancer	chr1	40278298	40278300	+	nc_inter_c1_169	TAD38_chr1	3599	0.776434	0.397562	0.506896	-1.97279	0.0406607	None	none	none	static	none	none	none	none	212085_E6	E6	219116_E5	E5	0	NA	238.488	302	-0.34	118.734	173.025
551	chr1	40277481	40277635	155	sex-indep (standard)	TAD38_chr1	none	sex_indep_static (n=64,584)	not_bound	none	0	0	0	0	Enh_115	Enh	enhancer	enhancer	chr1	40278298	40278300	+	nc_inter_c1_169	TAD38_chr1	664	0.776434	0.397562	0.506896	-1.97279	0.0406607	None	none	none	none	none	none	none	none	212087_E9	E9	219118_E9	E9	1	NA	39.225	52	-0.41	26.985	88.435
552	chr1	40278217	40278567	351	sex-indep (standard)	TAD38_chr1	none	sex_indep_static (n=64,584)	not_bound	none	0	0	0	0	Enh_116	Enh	enhancer	enhancer	chr1	40278298	40278300	+	nc_inter_c1_169	TAD38_chr1	0	0.776434	0.397562	0.506896	-1.97279	0.0406607	None	none	none	none	none	none	none	none	212088_E6	E6	219119_E6	E6	1	NA	87.864	89	-0.02	86.352	119.195
553	chr1	40278763	40279174	412	sex-indep (robust)	TAD38_chr1	STAT5_sDHS	sex_indep_static (n=64,584)	not_bound	none	0	0	0	2	WE_253	WE	weak_enhancer	enhancer	chr1	40278298	40278300	+	nc_inter_c1_169	TAD38_chr1	464	0.776434	0.397562	0.506896	-1.97279	0.0406607	None	none	none	dDHS_close	none	none	none	none	212090_E6	E6	219121_E6	E6	1	NA	403.233	271	0.57	226.674	349.895
554	chr1	40279606	40280014	409	sex-indep (robust)	TAD38_chr1	none	sex_indep_static (n=64,584)	not_bound	none	0	0	0	0	WE_254	WE	weak_enhancer	enhancer	chr1	40278298	40278300	+	nc_inter_c1_169	TAD38_chr1	1307	0.776434	0.397562	0.506896	-1.97279	0.0406607	None	none	none	none	none	none	none	none	212092_E6	E6	219123_E6	E6	1	NA	147.486	132	0.16	215.88	176.87
555	chr1	40281258	40282274	1017	sex-indep (robust)	TAD38_chr1	STAT5_sDHS	sex_indep_static (n=64,584)	STAT5_bound	common	270	124	197	1	Prom_75	Prom	promoter	promoter	chr1	40281924	40281926	+	il1r1	TAD38_chr1	0	4.10594	9.31949	2.35757	2.35757	7.09127e-17	Male	class_I	IB	dDHS_close	static	static	dDHS_open	static	212094_E6	E6	219125_E6	E6	1	NA	2045.98	2021	0.02	944.475	1268.85
556	chr1	40282597	40282828	232	sex-indep (standard)	TAD38_chr1	none	sex_indep_static (n=64,584)	STAT5_bound	common	270	124	197	0	Prom_76	Prom	promoter	promoter	chr1	40281924	40281926	+	il1r1	TAD38_chr1	672	4.10594	9.31949	2.35757	2.35757	7.09127e-17	Male	class_I	IB	none	none	none	none	none	212096_E8	E8	219127_E8	E8	1	NA	134.934	138	-0.03	91.749	84.59
557	chr1	40284598	40285212	615	Male (robust)	TAD38_chr1	STAT5_hi_dDHS	male_bias_dynamic (n=834)	STAT5_bound	common	652	351	501.5	2	Enh_117	Enh	enhancer	enhancer	chr1	40281924	40281926	+	il1r1	TAD38_chr1	2673	4.10594	9.31949	2.35757	2.35757	7.09127e-17	Male	class_I	IB	dDHS_close	static	dDHS_open	dDHS_open	none	212099_E7	E7	219131_E6	E6	0	1110	1521.93	759	1	453.348	999.7
558	chr1	40285950	40287026	1077	sex-indep (robust)	TAD38_chr1	STAT5_sDHS	sex_indep_static (n=64,584)	STAT5_bound	common	652	351	501.5	3	Enh_118	Enh	enhancer	enhancer	chr1	40281924	40281926	+	il1r1	TAD38_chr1	4025	4.10594	9.31949	2.35757	2.35757	7.09127e-17	Male	class_I	IB	dDHS_close	static	dDHS_open	dDHS_open	static	212100_E6	E6	219133_E6	E6	1	NA	1769.83	1237	0.52	890.505	1553.38
559	chr1	40287118	40287456	339	sex-indep (standard)	TAD38_chr1	STAT5_sDHS	sex_indep_static (n=64,584)	STAT5_bound	common	652	351	501.5	0	Enh_119	Enh	enhancer	enhancer	chr1	40281924	40281926	+	il1r1	TAD38_chr1	5193	4.10594	9.31949	2.35757	2.35757	7.09127e-17	Male	class_I	IB	dDHS_close	none	none	none	none	212104_E6	E6	219137_E6	E6	1	NA	196.125	172	0.19	151.116	149.955
560	chr1	40293477	40294208	732	Male (standard)	TAD38_chr1	STAT5_hi_dDHS	male_bias_dynamic (n=834)	STAT5_bound	common	507	672	589.5	7	Enh_120	Enh	enhancer	enhancer	chr1	40281924	40281926	+	il1r1	TAD38_chr1	11552	4.10594	9.31949	2.35757	2.35757	7.09127e-17	Male	class_I	IB	dDHS_close	static	dDHS_open	dDHS_open	none	212114_E6	E6	219139_E6	E6	1	1110	1374.44	262	2.39	172.704	346.05
561	chr1	40299557	40299948	392	Male (standard)	TAD38_chr1	STAT5_hi_dDHS	male_bias_dynamic (n=834)	STAT5_bound	common	600	578	589	4	Enh_121	Enh	enhancer	enhancer	chr1	40281924	40281926	+	il1r1	TAD38_chr1	17632	4.10594	9.31949	2.35757	2.35757	7.09127e-17	Male	class_I	IB	dDHS_close	static	dDHS_open	dDHS_open	none	212122_E6	E6	219148_E9	E9	0	1110	1176.75	199	2.56	145.719	307.6
562	chr1	40300363	40300825	463	sex-indep (robust)	TAD38_chr1	none	sex_indep_static (n=64,584)	STAT5_bound	common	600	578	589	0	Enh_122	Enh	enhancer	enhancer	chr1	40281924	40281926	+	il1r1	TAD38_chr1	18438	4.10594	9.31949	2.35757	2.35757	7.09127e-17	Male	class_I	IB	static	static	none	none	none	212124_E6	E6	219149_E6	E6	1	NA	362.439	230	0.66	199.689	280.685
563	chr1	40314093	40314310	218	sex-indep (standard)	TAD38_chr1	none	sex_indep_static (n=64,584)	not_bound	none	0	0	0	0	WE_255	WE	weak_enhancer	enhancer	chr1	40323430	40323432	+	il1r1	TAD38_chr1	9121	4.10594	9.31949	2.35757	2.35757	7.09127e-17	Male	class_I	IB	none	none	none	none	none	212137_E11	E11	219161_E14	E14	0	NA	72.174	48	0.59	102.543	42.295
564	chr1	40322962	40323891	930	sex-indep (robust)	TAD38_chr1	STAT5_sDHS	sex_indep_static (n=64,584)	STAT5_bound	common	115	73	94	4	Enh_123	Enh	enhancer	enhancer	chr1	40323430	40323432	+	il1r1	TAD38_chr1	0	4.10594	9.31949	2.35757	2.35757	7.09127e-17	Male	class_I	IB	static	static	static	static	static	212144_E7	E7	219167_E6	E6	0	NA	455.01	404	0.17	464.142	380.655
565	chr1	40328441	40328772	332	sex-indep (standard)	TAD38_chr1	none	sex_indep_static (n=64,584)	not_bound	none	0	0	0	2	WE_256	WE	weak_enhancer	enhancer	chr1	40323430	40323432	+	il1r1	TAD38_chr1	5010	4.10594	9.31949	2.35757	2.35757	7.09127e-17	Male	class_I	IB	none	static	none	none	none	212152_E5	E5	219171_E13	E13	0	NA	133.365	70	0.93	172.704	165.335
566	chr1	40368058	40368316	259	sex-indep (standard)	TAD38_chr1	STAT5_sDHS	sex_indep_static (n=64,584)	not_bound	none	0	0	0	0	Enh_124	Enh	enhancer	enhancer	chr1	40381471	40381473	+	il1rl2	TAD38_chr1	13156	0.0506898	0.0301407	0.663543	-1.50706	1	None	none	none	static	none	none	none	none	212171_E6	E6	219185_E11	E11	0	NA	105.123	80	0.39	75.558	123.04
567	chr1	40368609	40368861	253	sex-indep (standard)	TAD38_chr1	STAT5_sDHS	sex_indep_static (n=64,584)	not_bound	none	0	0	0	0	Enh_125	Enh	enhancer	enhancer	chr1	40381471	40381473	+	il1rl2	TAD38_chr1	12611	0.0506898	0.0301407	0.663543	-1.50706	1	None	none	none	static	none	none	none	none	212173_E6	E6	219185_E11	E11	0	NA	89.433	79	0.18	53.97	103.815
568	chr1	40435690	40435949	260	sex-indep (standard)	TAD38_chr1	STAT5_sDHS	sex_indep_static (n=64,584)	not_bound	none	0	0	0	0	Insul_59	Insul	insulator	insulator	chr1	40381471	40381473	+	il1rl2	TAD38_chr1	54218	0.0506898	0.0301407	0.663543	-1.50706	1	None	none	none	static	none	none	none	none	212182_E12	E12	219194_E12	E12	1	NA	61.191	70	-0.19	97.146	80.745
569	chr1	40738092	40738338	247	sex-indep (standard)	TAD40_chr1	none	sex_indep_static (n=64,584)	not_bound	none	0	0	0	0	WE_257	WE	weak_enhancer	enhancer	chr1	40738556	40738558	+	slc9a2	TAD40_chr1	219	0	0.00223624	3.67868	3.67868	1	None	none	none	none	none	none	none	none	212206_E12	E12	219225_E12	E12	1	NA	43.932	51	-0.22	97.146	30.76
570	chr1	40847204	40847737	534	sex-indep (robust)	TAD40_chr1	STAT5_sDHS	sex_indep_static (n=64,584)	not_bound	none	0	0	0	0	Prom_77	Prom	promoter	promoter	chr1	40847500	40847502	-	mfsd9	TAD40_chr1	0	0.459041	0.455809	1.04184	1.04184	1	None	none	none	static	static	static	static	static	212224_E7	E7	219237_E7	E7	1	NA	376.56	397	-0.08	399.378	296.065
571	chr1	41446994	41447313	320	sex-indep (robust)	TAD40_chr1	STAT5_sDHS	sex_indep_static (n=64,584)	not_bound	none	0	0	0	0	WE_258	WE	weak_enhancer	enhancer	chr1	41238095	41238097	-	4930448i06rik	TAD40_chr1	208898	0	0	1	1	1	None	none	none	static	none	static	static	static	212268_E12	E12	219286_E12	E12	1	NA	117.675	85	0.47	232.071	73.055
572	chr1	41608251	41608848	598	Male (standard)	TAD40_chr1	STAT5_hi_dDHS	male_bias_dynamic (n=834)	STAT5_bound	common	491	239	365	2	Enh_126	Enh	enhancer	enhancer	chr1	41238095	41238097	-	4930448i06rik	TAD40_chr1	370155	0	0	1	1	1	None	none	none	dDHS_close	none	dDHS_open	dDHS_open	none	212278_E6	E6	219294_E11	E11	0	1110	1514.09	293	2.37	102.543	272.995
573	chr1	41612445	41613149	705	sex-indep (robust)	TAD40_chr1	STAT5_hi_dDHS	sex_indep_dynamic (n=1532)	STAT5_bound	common	1775	1136	1455.5	4	Enh_127	Enh	enhancer	enhancer	chr1	41238095	41238097	-	4930448i06rik	TAD40_chr1	374349	0	0	1	1	1	None	none	none	dDHS_close	static	dDHS_open	dDHS_open	dDHS_open	212283_E6	E6	219297_E6	E6	1	1111	2158.94	903	1.26	993.048	1761.01
574	chr1	41615911	41616549	639	sex-indep (robust)	TAD40_chr1	STAT5_hi_dDHS	sex_indep_dynamic (n=1532)	STAT5_bound	common	955	986	970.5	1	Insul_60	Insul	insulator	insulator	chr1	41238095	41238097	-	4930448i06rik	TAD40_chr1	377815	0	0	1	1	1	None	none	none	dDHS_close	static	dDHS_open	dDHS_open	static	212292_E5	E5	219306_E5	E5	1	1110	3092.5	1306	1.24	723.198	1941.72
575	chr1	41616897	41617268	372	sex-indep (robust)	TAD40_chr1	none	sex_indep_static (n=64,584)	STAT5_bound	common	952	986	969	0	WE_259	WE	weak_enhancer	enhancer	chr1	41238095	41238097	-	4930448i06rik	TAD40_chr1	378801	0	0	1	1	1	None	none	none	none	static	none	none	none	212292_E5	E5	219306_E5	E5	1	NA	442.458	303	0.55	129.528	488.315
576	chr1	41709503	41709883	381	sex-indep (robust)	TAD40_chr1	STAT5_sDHS	sex_indep_static (n=64,584)	not_bound	none	0	0	0	0	WE_260	WE	weak_enhancer	enhancer	chr1	41238095	41238097	-	4930448i06rik	TAD40_chr1	471407	0	0	1	1	1	None	none	none	static	static	static	static	none	212301_E5	E5	219310_E12	E12	0	NA	262.023	221	0.25	167.307	330.67
577	chr1	41809378	41809674	297	sex-indep (standard)	TAD40_chr1	STAT5_sDHS	sex_indep_static (n=64,584)	not_bound	none	0	0	0	0	WE_261	WE	weak_enhancer	enhancer	chr1	41238095	41238097	-	4930448i06rik	TAD40_chr1	571282	0	0	1	1	1	None	none	none	static	static	none	none	none	212304_E12	E12	219312_E12	E12	1	NA	92.571	139	-0.59	102.543	315.29
578	chr1	42589553	42590168	616	sex-indep (robust)	TAD40_chr1	STAT5_sDHS	sex_indep_static (n=64,584)	not_bound	none	0	0	0	0	WE_262	WE	weak_enhancer	enhancer	chr1	42751668	42751670	-	pantr1	TAD40_chr1	161501	0	0	1	1	1	None	none	none	static	static	none	none	static	212354_E6	E6	219354_E6	E6	1	NA	172.59	297	-0.78	291.438	299.91
579	chr1	42598990	42599164	175	sex-indep (standard)	TAD40_chr1	STAT5_sDHS	sex_indep_static (n=64,584)	not_bound	none	0	0	0	0	WE_263	WE	weak_enhancer	enhancer	chr1	42751668	42751670	-	pantr1	TAD40_chr1	152505	0	0	1	1	1	None	none	none	static	static	none	none	none	212364_E6	E6	219361_E6	E6	1	NA	91.002	105	-0.21	102.543	138.42
580	chr1	42599785	42600085	301	sex-indep (standard)	TAD40_chr1	STAT5_sDHS	sex_indep_static (n=64,584)	not_bound	none	0	0	0	0	WE_264	WE	weak_enhancer	enhancer	chr1	42751668	42751670	-	pantr1	TAD40_chr1	151584	0	0	1	1	1	None	none	none	none	none	none	none	none	212365_E9	E9	219364_E9	E9	1	NA	72.174	86	-0.25	75.558	99.97
581	chr1	42798407	42798953	547	Male (robust)	TAD40_chr1	STAT5_hi_dDHS	male_bias_dynamic (n=834)	STAT5_bound	male_enriched	248	5	126.5	2	WE_265	WE	weak_enhancer	enhancer	chr1	42807556	42807558	+	dalir	TAD40_chr1	8604	0	0	1	1	1	None	none	none	dDHS_close	none	none	none	none	212389_E12	E12	219381_E12	E12	1	1000	530.322	253	1.07	113.337	84.59
582	chr1	42907766	42908578	813	sex-indep (robust)	TAD40_chr1	STAT5_sDHS	sex_indep_static (n=64,584)	not_bound	none	0	0	0	2	Prom_78	Prom	promoter	promoter	chr1	42908077	42908079	+	mrps9	TAD40_chr1	0	7.56537	6.78578	0.926959	-1.0788	0.966941	sex_indep	none	none	static	static	static	static	static	212401_E7	E7	219398_E7	E7	1	NA	1716.49	1781	-0.05	1484.17	1357.29
583	chr1	43148422	43149843	1422	sex-indep (robust)	TAD40_chr1	STAT5_sDHS	sex_indep_static (n=64,584)	not_bound	none	0	0	0	0	Prom_79	Prom	promoter	promoter	chr1	43155465	43155467	-	tgfbrap1	TAD40_chr1	5623	3.78557	4.08295	1.11831	1.11831	0.490569	sex_indep	none	none	static	static	static	static	static	212458_E7	E7	219456_E7	E7	1	NA	751.551	848	-0.17	820.344	507.54
584	chr1	43154987	43156018	1032	sex-indep (robust)	TAD40_chr1	STAT5_sDHS	sex_indep_static (n=64,584)	not_bound	none	0	0	0	0	Prom_80	Prom	promoter	promoter	chr1	43155465	43155467	-	tgfbrap1	TAD40_chr1	0	3.78557	4.08295	1.11831	1.11831	0.490569	sex_indep	none	none	static	static	static	static	static	212468_E7	E7	219465_E7	E7	1	NA	1390.13	1468	-0.08	1149.56	942.025
585	chr1	43196543	43196749	207	sex-indep (robust)	TAD41_chr1	STAT5_sDHS	sex_indep_static (n=64,584)	not_bound	none	0	0	0	0	Insul_61	Insul	insulator	insulator	chr1	43220804	43220806	-	fhl2	TAD41_chr1	24056	0.141851	0.138824	0.989646	-1.01046	1	None	none	none	static	none	none	none	none	212482_E2	E2	219476_E2	E2	1	NA	54.915	82	-0.58	75.558	80.745
586	chr1	43307169	43307574	406	sex-indep (robust)	TAD41_chr1	STAT5_sDHS	sex_indep_static (n=64,584)	STAT5_bound	common	159	135	147	2	WE_266	WE	weak_enhancer	enhancer	chr1	43253604	43253606	-	fhl2	TAD41_chr1	53564	0.141851	0.138824	0.989646	-1.01046	1	None	none	none	static	static	dDHS_open	none	none	212489_E12	E12	219489_E12	E12	1	NA	194.556	152	0.36	134.925	299.91
587	chr1	43330171	43330410	240	Male (standard)	TAD41_chr1	STAT5_sDHS	male_bias_static (n=1895)	not_bound	none	0	0	0	0	WE_267	WE	weak_enhancer	enhancer	chr1	43253604	43253606	-	fhl2	TAD41_chr1	76566	0.141851	0.138824	0.989646	-1.01046	1	None	none	none	static	none	none	none	none	212493_E12	E12	219490_E2	E2	0	NA	89.433	104	-0.22	53.97	103.815
588	chr1	43347674	43347877	204	sex-indep (standard)	TAD42_chr1	none	sex_indep_static (n=64,584)	not_bound	none	0	0	0	0	WE_268	WE	weak_enhancer	enhancer	chr1	43502595	43502597	+	nck2	TAD42_chr1	154719	0.541498	0.456344	0.870769	-1.14841	1	None	none	none	none	none	none	none	none	212500_E5	E5	219490_E2	E2	0	NA	25.104	25	0.01	70.161	11.535
589	chr1	43362118	43362550	433	sex-indep (robust)	TAD42_chr1	STAT5_sDHS	sex_indep_static (n=64,584)	not_bound	none	0	0	0	0	WE_269	WE	weak_enhancer	enhancer	chr1	43502595	43502597	+	nck2	TAD42_chr1	140046	0.541498	0.456344	0.870769	-1.14841	1	None	none	none	static	static	dDHS_open	static	dDHS_open	212504_E12	E12	219492_E12	E12	1	NA	787.638	576	0.45	561.288	1088.13
590	chr1	43362894	43363111	218	sex-indep (standard)	TAD42_chr1	none	sex_indep_static (n=64,584)	not_bound	none	0	0	0	0	WE_270	WE	weak_enhancer	enhancer	chr1	43502595	43502597	+	nck2	TAD42_chr1	139485	0.541498	0.456344	0.870769	-1.14841	1	None	none	none	static	static	none	none	none	212504_E12	E12	219492_E12	E12	1	NA	100.416	61	0.72	97.146	153.8
591	chr1	43394115	43394607	493	sex-indep (robust)	TAD42_chr1	STAT5_sDHS	sex_indep_static (n=64,584)	not_bound	none	0	0	0	2	WE_271	WE	weak_enhancer	enhancer	chr1	43502595	43502597	+	nck2	TAD42_chr1	107989	0.541498	0.456344	0.870769	-1.14841	1	None	none	none	static	none	static	static	static	212509_E5	E5	219499_E5	E5	1	NA	125.52	143	-0.19	264.453	157.645
592	chr1	43420150	43420289	140	sex-indep (standard)	TAD42_chr1	none	sex_indep_static (n=64,584)	not_bound	none	0	0	0	0	WE_272	WE	weak_enhancer	enhancer	chr1	43502595	43502597	+	nck2	TAD42_chr1	82307	0.541498	0.456344	0.870769	-1.14841	1	None	none	none	none	none	none	none	none	212514_E13	E13	219503_E2	E2	0	NA	26.673	18	0.57	53.97	19.225
593	chr1	43455896	43456118	223	sex-indep (standard)	TAD42_chr1	STAT5_sDHS	sex_indep_static (n=64,584)	not_bound	none	0	0	0	0	WE_273	WE	weak_enhancer	enhancer	chr1	43502595	43502597	+	nck2	TAD42_chr1	46478	0.541498	0.456344	0.870769	-1.14841	1	None	none	none	dDHS_close	dDHS_close	none	none	none	212517_E12	E12	219508_E12	E12	1	NA	252.609	289	-0.19	113.337	396.035
594	chr1	43501512	43501701	190	sex-indep (standard)	TAD42_chr1	none	sex_indep_static (n=64,584)	not_bound	none	0	0	0	0	WE_274	WE	weak_enhancer	enhancer	chr1	43502595	43502597	+	nck2	TAD42_chr1	895	0.541498	0.456344	0.870769	-1.14841	1	None	none	none	none	none	none	none	none	212523_E2	E2	219516_E11	E11	0	NA	31.38	38	-0.28	107.94	46.14
595	chr1	43501985	43502593	609	sex-indep (robust)	TAD42_chr1	STAT5_sDHS	sex_indep_static (n=64,584)	not_bound	none	0	0	0	0	WP_40	WP	weak_promoter	promoter	chr1	43502595	43502597	+	nck2	TAD42_chr1	3	0.541498	0.456344	0.870769	-1.14841	1	None	none	none	dDHS_open	none	static	static	static	212525_E7	E7	219517_E6	E6	0	NA	211.815	269	-0.34	491.127	153.8
596	chr1	43503054	43503365	312	sex-indep (standard)	TAD42_chr1	none	sex_indep_static (n=64,584)	not_bound	none	0	0	0	0	WP_41	WP	weak_promoter	promoter	chr1	43502595	43502597	+	nck2	TAD42_chr1	458	0.541498	0.456344	0.870769	-1.14841	1	None	none	none	none	none	none	none	none	212526_E8	E8	219519_E7	E7	0	NA	65.898	72	-0.13	161.91	49.985
597	chr1	43542057	43542495	439	sex-indep (robust)	TAD42_chr1	STAT5_sDHS	sex_indep_static (n=64,584)	not_bound	none	0	0	0	0	WE_275	WE	weak_enhancer	enhancer	chr1	43502595	43502597	+	nck2	TAD42_chr1	39461	0.541498	0.456344	0.870769	-1.14841	1	None	none	none	static	static	static	none	none	212532_E12	E12	219534_E12	E12	1	NA	251.04	208	0.27	161.91	188.405
598	chr1	43591257	43591522	266	sex-indep (robust)	TAD42_chr1	STAT5_sDHS	sex_indep_static (n=64,584)	not_bound	none	0	0	0	0	WE_276	WE	weak_enhancer	enhancer	chr1	43502595	43502597	+	nck2	TAD42_chr1	88661	0.541498	0.456344	0.870769	-1.14841	1	None	none	none	static	static	static	static	static	212541_E11	E11	219550_E11	E11	1	NA	183.573	268	-0.55	178.101	257.615
599	chr1	43883967	43885092	1126	sex-indep (robust)	TAD43_chr1	STAT5_sDHS	sex_indep_static (n=64,584)	not_bound	none	0	0	0	0	Prom_81	Prom	promoter	promoter	chr1	43884551	43884553	-	uxs1	TAD43_chr1	0	4.32452	4.85496	1.16558	1.16558	0.454925	sex_indep	none	none	static	static	static	static	static	212573_E7	E7	219593_E7	E7	1	NA	2030.29	2129	-0.07	2266.74	1657.19
600	chr1	43959789	43960082	294	sex-indep (standard)	TAD43_chr1	STAT5_sDHS	sex_indep_static (n=64,584)	STAT5_bound	common	313	312	312.5	2	Insul_62	Insul	insulator	insulator	chr1	43990779	43990781	-	nc_inter_c1_181	TAD43_chr1	30698	1.61346	2.08902	1.26751	1.26751	0.625588	None	none	none	static	none	none	none	none	212585_E12	E12	219606_E12	E12	1	NA	180.435	121	0.58	97.146	111.505
601	chr1	43990256	43991540	1285	sex-indep (robust)	TAD43_chr1	STAT5_sDHS	sex_indep_static (n=64,584)	STAT5_bound	common	417	286	351.5	2	Prom_82	Prom	promoter	promoter	chr1	43990779	43990781	-	nc_inter_c1_181	TAD43_chr1	0	1.61346	2.08902	1.26751	1.26751	0.625588	None	none	none	static	static	static	static	static	212592_E7	E7	219613_E7	E7	1	NA	4129.61	4140	0	4215.06	3187.51
602	chr1	44072355	44072744	390	sex-indep (robust)	TAD43_chr1	STAT5_sDHS	sex_indep_static (n=64,584)	not_bound	none	0	0	0	1	WE_277	WE	weak_enhancer	enhancer	chr1	44076849	44076851	-	mettl21c	TAD43_chr1	4106	0	0.0153282	6.38128	6.38128	1	None	none	none	static	static	none	static	none	212601_E6	E6	219628_E12	E12	0	NA	197.694	173	0.19	242.865	246.08
603	chr1	44158415	44159618	1204	sex-indep (robust)	TAD43_chr1	STAT5_sDHS	sex_indep_static (n=64,584)	not_bound	none	0	0	0	0	Prom_83	Prom	promoter	promoter	chr1	44159231	44159233	-	tex30	TAD43_chr1	0	1.50081	1.88991	1.3184	1.3184	0.184532	None	none	none	static	static	static	static	static	212614_E7	E7	219641_E7	E7	1	NA	975.918	913	0.1	1041.62	619.045
605	chr1	44186816	44187311	496	sex-indep (standard)	TAD43_chr1	STAT5_sDHS	sex_indep_static (n=64,584)	STAT5_bound	common	454	287	370.5	3	Enh_128	Enh	enhancer	enhancer	chr1	44176812	44176814	+	bivm	TAD43_chr1	10003	2.27157	2.52475	1.16294	1.16294	0.561125	sex_indep	none	none	dDHS_close	dDHS_close	dDHS_open	static	none	212632_E6	E6	219659_E6	E6	1	NA	1285.01	738	0.8	286.041	792.07
606	chr1	44199727	44199992	266	sex-indep (standard)	TAD43_chr1	STAT5_sDHS	sex_indep_static (n=64,584)	not_bound	none	0	0	0	2	WE_278	WE	weak_enhancer	enhancer	chr1	44204588	44204590	+	ercc5	TAD43_chr1	4597	2.2097	2.08623	0.97827	-1.02221	1	sex_indep	none	none	static	none	none	none	none	212638_E9	E9	219664_E9	E9	1	NA	131.796	109	0.27	107.94	188.405
607	chr1	44200548	44200881	334	sex-indep (standard)	TAD43_chr1	none	sex_indep_static (n=64,584)	not_bound	none	0	0	0	0	WE_279	WE	weak_enhancer	enhancer	chr1	44204588	44204590	+	ercc5	TAD43_chr1	3708	2.2097	2.08623	0.97827	-1.02221	1	sex_indep	none	none	none	static	none	none	none	212639_E6	E6	219665_E10	E10	0	NA	158.469	92	0.78	134.925	203.785
608	chr1	44204273	44205207	935	sex-indep (robust)	TAD43_chr1	STAT5_sDHS	sex_indep_static (n=64,584)	not_bound	none	0	0	0	0	Prom_84	Prom	promoter	promoter	chr1	44204588	44204590	+	ercc5	TAD43_chr1	0	2.2097	2.08623	0.97827	-1.02221	1	sex_indep	none	none	static	static	static	static	static	212645_E7	E7	219669_E7	E7	1	NA	801.759	726	0.14	593.67	549.835
609	chr1	44255165	44256001	837	sex-indep (robust)	TAD43_chr1	STAT5_sDHS	sex_indep_static (n=64,584)	not_bound	none	0	0	0	3	WE_280	WE	weak_enhancer	enhancer	chr1	44204588	44204590	+	ercc5	TAD43_chr1	50576	2.2097	2.08623	0.97827	-1.02221	1	sex_indep	none	none	static	static	none	none	none	212655_E12	E12	219676_E12	E12	1	NA	216.522	186	0.22	199.689	253.77
610	chr1	44853728	44854012	285	Male (robust)	TAD44_chr1	STAT5_sDHS	male_bias_static (n=1895)	STAT5_bound	male_enriched	205	4	104.5	2	WE_281	WE	weak_enhancer	enhancer	chr1	44801792	44801794	-	4930521e06rik	TAD44_chr1	51935	0	0	1	1	1	None	none	none	dDHS_close	none	static	none	none	212688_E12	E12	219723_E2	E2	0	NA	285.558	194	0.56	97.146	57.675
611	chr1	44890953	44891485	533	Male (less stringent)	TAD44_chr1	STAT5_sDHS	male_bias_static (n=1895)	not_bound	none	0	0	0	6	WE_282	WE	weak_enhancer	enhancer	chr1	44801792	44801794	-	4930521e06rik	TAD44_chr1	89160	0	0	1	1	1	None	none	none	dDHS_close	none	none	none	none	212692_E12	E12	219723_E2	E2	0	NA	354.594	256	0.47	156.513	84.59
612	chr1	45488856	45489146	291	sex-indep (standard)	TAD44_chr1	STAT5_sDHS	sex_indep_static (n=64,584)	not_bound	none	0	0	0	0	Insul_63	Insul	insulator	insulator	chr1	45560125	45560127	-	col5a2	TAD44_chr1	70980	0.411335	0.376164	0.960565	-1.04105	1	None	none	none	static	none	none	none	none	212720_E12	E12	219760_E5	E5	0	NA	125.52	141	-0.17	80.955	126.885
613	chr1	45598905	45599085	181	sex-indep (standard)	TAD44_chr1	none	sex_indep_static (n=64,584)	not_bound	none	0	0	0	2	WE_283	WE	weak_enhancer	enhancer	chr1	45560125	45560127	-	col5a2	TAD44_chr1	38779	0.411335	0.376164	0.960565	-1.04105	1	None	none	none	none	none	none	none	none	212726_E2	E2	219765_E2	E2	1	NA	53.346	57	-0.1	59.367	53.83
614	chr1	45702214	45702488	275	sex-indep (robust)	TAD44_chr1	STAT5_sDHS	sex_indep_static (n=64,584)	not_bound	none	0	0	0	0	WE_284	WE	weak_enhancer	enhancer	chr1	45560125	45560127	-	col5a2	TAD44_chr1	142088	0.411335	0.376164	0.960565	-1.04105	1	None	none	none	static	static	static	static	static	212731_E8	E8	219774_E8	E8	1	NA	230.643	222	0.06	361.599	434.485
615	chr1	45729712	45729912	201	sex-indep (standard)	TAD44_chr1	STAT5_sDHS	sex_indep_static (n=64,584)	not_bound	none	0	0	0	0	WE_285	WE	weak_enhancer	enhancer	chr1	45560125	45560127	-	col5a2	TAD44_chr1	169586	0.411335	0.376164	0.960565	-1.04105	1	None	none	none	static	none	none	none	none	212732_E2	E2	219777_E2	E2	1	NA	94.14	55	0.78	64.764	57.675
616	chr1	45851714	45852769	1056	sex-indep (robust)	TAD45_chr1	STAT5_sDHS	sex_indep_static (n=64,584)	not_bound	none	0	0	0	1	Prom_85	Prom	promoter	promoter	chr1	45852345	45852347	+	wdr75	TAD45_chr1	0	2.39586	2.42759	1.05405	1.05405	1	sex_indep	none	none	static	dDHS_open	static	static	static	212743_E7	E7	219787_E7	E7	1	NA	3891.12	3855	0.01	4501.1	2999.1
617	chr1	45882077	45882276	200	sex-indep (standard)	TAD45_chr1	STAT5_sDHS	sex_indep_static (n=64,584)	not_bound	none	0	0	0	0	Insul_64	Insul	insulator	insulator	chr1	45886494	45886496	-	nc_inter_c1_184	TAD45_chr1	4219	0	0	1	1	1	None	none	none	static	none	none	none	none	212750_E10	E10	219794_E10	E10	1	NA	80.019	86	-0.1	75.558	88.435
618	chr1	45894524	45894937	414	sex-indep (robust)	TAD45_chr1	STAT5_sDHS	sex_indep_static (n=64,584)	not_bound	none	0	0	0	1	WE_286	WE	weak_enhancer	enhancer	chr1	45886494	45886496	-	nc_inter_c1_184	TAD45_chr1	8029	0	0	1	1	1	None	none	none	static	static	none	static	static	212755_E5	E5	219796_E5	E5	1	NA	263.592	210	0.33	215.88	269.15
619	chr1	45917114	45917579	466	sex-indep (robust)	TAD45_chr1	STAT5_sDHS	sex_indep_static (n=64,584)	not_bound	none	0	0	0	1	Enh_129	Enh	enhancer	enhancer	chr1	45886494	45886496	-	nc_inter_c1_184	TAD45_chr1	30619	0	0	1	1	1	None	none	none	static	static	static	static	static	212765_E6	E6	219802_E6	E6	1	NA	480.114	558	-0.22	458.745	565.215
620	chr1	45921350	45921823	474	sex-indep (robust)	TAD45_chr1	none	sex_indep_static (n=64,584)	not_bound	none	0	0	0	0	WE_287	WE	weak_enhancer	enhancer	chr1	45886494	45886496	-	nc_inter_c1_184	TAD45_chr1	34855	0	0	1	1	1	None	none	none	none	none	none	none	none	212769_E6	E6	219805_E5	E5	0	NA	150.624	174	-0.21	183.498	226.855
621	chr1	45922214	45922525	312	sex-indep (robust)	TAD45_chr1	none	sex_indep_static (n=64,584)	not_bound	none	0	0	0	2	WE_288	WE	weak_enhancer	enhancer	chr1	45886494	45886496	-	nc_inter_c1_184	TAD45_chr1	35719	0	0	1	1	1	None	none	none	none	static	none	none	none	212771_E6	E6	219808_E6	E6	1	NA	119.244	144	-0.27	156.513	165.335
622	chr1	45922695	45922865	171	sex-indep (standard)	TAD45_chr1	none	sex_indep_static (n=64,584)	not_bound	none	0	0	0	0	WE_289	WE	weak_enhancer	enhancer	chr1	45886494	45886496	-	nc_inter_c1_184	TAD45_chr1	36200	0	0	1	1	1	None	none	none	none	none	none	none	none	212772_E9	E9	219808_E6	E6	0	NA	54.915	59	-0.1	64.764	119.195
623	chr1	45925764	45925984	221	sex-indep (standard)	TAD45_chr1	STAT5_sDHS	sex_indep_static (n=64,584)	not_bound	none	0	0	0	0	WE_290	WE	weak_enhancer	enhancer	chr1	45886494	45886496	-	nc_inter_c1_184	TAD45_chr1	39269	0	0	1	1	1	None	none	none	static	static	static	static	static	212777_E6	E6	219811_E6	E6	1	NA	97.278	113	-0.22	167.307	134.575
624	chr1	45938266	45938637	372	sex-indep (robust)	TAD45_chr1	STAT5_sDHS	sex_indep_static (n=64,584)	not_bound	none	0	0	0	2	WE_291	WE	weak_enhancer	enhancer	chr1	45982437	45982439	-	slc40a1	TAD45_chr1	43801	40.8677	34.3754	0.871966	-1.14683	0.315581	sex_indep	none	none	static	static	static	static	static	212795_E10	E10	219823_E13	E13	0	NA	153.762	130	0.24	264.453	261.46
625	chr1	45954957	45955232	276	sex-indep (robust)	TAD45_chr1	STAT5_sDHS	sex_indep_static (n=64,584)	not_bound	none	0	0	0	0	WE_292	WE	weak_enhancer	enhancer	chr1	45982437	45982439	-	slc40a1	TAD45_chr1	27206	40.8677	34.3754	0.871966	-1.14683	0.315581	sex_indep	none	none	static	static	static	static	static	212799_E6	E6	219828_E6	E6	1	NA	348.318	366	-0.07	388.584	349.895
626	chr1	45960936	45961540	605	sex-indep (robust)	TAD45_chr1	STAT5_sDHS	sex_indep_static (n=64,584)	not_bound	none	0	0	0	0	Enh_130	Enh	enhancer	enhancer	chr1	45982437	45982439	-	slc40a1	TAD45_chr1	20898	40.8677	34.3754	0.871966	-1.14683	0.315581	sex_indep	none	none	static	static	static	static	static	212804_E6	E6	219834_E6	E6	1	NA	957.09	993	-0.05	863.52	426.795
627	chr1	45961648	45962752	1105	sex-indep (robust)	TAD45_chr1	STAT5_sDHS	sex_indep_static (n=64,584)	STAT5_bound	common	513	273	393	0	Enh_131	Enh	enhancer	enhancer	chr1	45982437	45982439	-	slc40a1	TAD45_chr1	19686	40.8677	34.3754	0.871966	-1.14683	0.315581	sex_indep	none	none	static	static	static	dDHS_close	static	212806_E6	E6	219836_E6	E6	1	NA	2292.31	2423	-0.08	2315.31	2895.28
628	chr1	45963123	45963852	730	sex-indep (robust)	TAD45_chr1	none	sex_indep_static (n=64,584)	STAT5_bound	common	513	273	393	0	Enh_132	Enh	enhancer	enhancer	chr1	45982437	45982439	-	slc40a1	TAD45_chr1	18586	40.8677	34.3754	0.871966	-1.14683	0.315581	sex_indep	none	none	none	none	none	none	none	212808_E6	E6	219838_E6	E6	1	NA	269.868	262	0.04	134.925	234.545
629	chr1	45970166	45970357	192	sex-indep (standard)	TAD45_chr1	STAT5_sDHS	sex_indep_static (n=64,584)	not_bound	none	0	0	0	0	Enh_133	Enh	enhancer	enhancer	chr1	45982437	45982439	-	slc40a1	TAD45_chr1	12081	40.8677	34.3754	0.871966	-1.14683	0.315581	sex_indep	none	none	none	none	none	none	none	212814_E11	E11	219845_E9	E9	0	NA	70.605	48	0.56	43.176	53.83
630	chr1	45976858	45976987	130	sex-indep (standard)	TAD45_chr1	none	sex_indep_static (n=64,584)	STAT5_bound	common	1499	1229	1364	0	Enh_134	Enh	enhancer	enhancer	chr1	45982437	45982439	-	slc40a1	TAD45_chr1	5451	40.8677	34.3754	0.871966	-1.14683	0.315581	sex_indep	none	none	none	none	none	none	none	212820_E9	E9	219853_E9	E9	1	NA	29.811	27	0.14	37.779	34.605
631	chr1	45977477	45978243	767	sex-indep (robust)	TAD45_chr1	STAT5_sDHS	sex_indep_static (n=64,584)	STAT5_bound	common	1499	1229	1364	4	Enh_135	Enh	enhancer	enhancer	chr1	45982437	45982439	-	slc40a1	TAD45_chr1	4195	40.8677	34.3754	0.871966	-1.14683	0.315581	sex_indep	none	none	static	dDHS_close	static	static	static	212821_E6	E6	219854_E6	E6	1	NA	3106.62	2214	0.49	1754.03	3752.72
632	chr1	45980083	45980520	438	sex-indep (robust)	TAD45_chr1	none	sex_indep_static (n=64,584)	not_bound	none	0	0	0	0	Prom_86	Prom	promoter	promoter	chr1	45982437	45982439	-	slc40a1	TAD45_chr1	1918	40.8677	34.3754	0.871966	-1.14683	0.315581	sex_indep	none	none	none	none	none	none	none	212823_E7	E7	219857_E7	E7	1	NA	338.904	350	-0.05	232.071	499.85
634	chr1	46132802	46133104	303	sex-indep (standard)	TAD46_chr1	none	sex_indep_static (n=64,584)	not_bound	none	0	0	0	0	WE_293	WE	weak_enhancer	enhancer	chr1	46123582	46123584	+	dnah7b	TAD46_chr1	9219	0.00267823	0.00342003	1.25942	1.25942	1	None	none	none	none	none	none	none	none	212832_E5	E5	219876_E12	E12	0	NA	6.276	3	1.06	21.588	0
635	chr1	46906682	46906905	224	sex-indep (robust)	TAD46_chr1	none	sex_indep_static (n=64,584)	not_bound	none	0	0	0	1	Insul_65	Insul	insulator	insulator	chr1	46910352	46910354	-	slc39a10	TAD46_chr1	3448	0.49352	0.46609	0.991626	-1.00845	1	None	none	none	none	none	none	none	none	212853_E12	E12	219899_E5	E5	0	NA	123.951	122	0.02	172.704	153.8
636	chr1	46909387	46911372	1986	sex-indep (robust)	TAD46_chr1	STAT5_sDHS	sex_indep_static (n=64,584)	not_bound	none	0	0	0	6	Prom_87	Prom	promoter	promoter	chr1	46910352	46910354	-	slc39a10	TAD46_chr1	0	0.49352	0.46609	0.991626	-1.00845	1	None	none	none	static	dDHS_open	static	static	static	212861_E7	E7	219905_E7	E7	1	NA	4854.49	5477	-0.17	5650.66	3983.42
637	chr1	49627788	49628116	329	Male (standard)	TAD47_chr1	STAT5_hi_dDHS	male_bias_dynamic (n=834)	not_bound	none	0	0	0	0	Enh_136	Enh	enhancer	enhancer	chr1	50984366	50984368	+	tmeff2	TAD47_chr1	1356251	0	0	1	1	1	None	none	none	dDHS_close	static	none	none	none	212943_E11	E11	220033_E11	E11	1	1000	600.927	232	1.37	97.146	315.29
638	chr1	49629448	49629745	298	Male (standard)	TAD47_chr1	STAT5_hi_dDHS	male_bias_dynamic (n=834)	not_bound	none	0	0	0	0	WE_294	WE	weak_enhancer	enhancer	chr1	50984366	50984368	+	tmeff2	TAD47_chr1	1354622	0	0	1	1	1	None	none	none	dDHS_close	static	static	static	static	212943_E11	E11	220033_E11	E11	1	1000	837.846	392	1.1	302.232	576.75
639	chr1	50527546	50527759	214	sex-indep (standard)	TAD47_chr1	STAT5_sDHS	sex_indep_static (n=64,584)	STAT5_bound	female_enriched	30	98	64	0	WE_295	WE	weak_enhancer	enhancer	chr1	50984366	50984368	+	tmeff2	TAD47_chr1	456608	0	0	1	1	1	None	none	none	none	static	none	none	none	212957_E2	E2	220065_E11	E11	0	NA	97.278	68	0.52	59.367	265.305
640	chr1	50739713	50740448	736	sex-indep (robust)	TAD47_chr1	STAT5_sDHS	sex_indep_static (n=64,584)	STAT5_bound	common	278	106	192	1	Enh_137	Enh	enhancer	enhancer	chr1	50984366	50984368	+	tmeff2	TAD47_chr1	243919	0	0	1	1	1	None	none	none	static	static	static	static	static	212962_E5	E5	220073_E12	E12	0	NA	1507.81	1518	-0.01	1883.55	2676.12
641	chr1	50742333	50742565	233	sex-indep (standard)	TAD47_chr1	none	sex_indep_static (n=64,584)	not_bound	none	0	0	0	0	WE_296	WE	weak_enhancer	enhancer	chr1	50984366	50984368	+	tmeff2	TAD47_chr1	241802	0	0	1	1	1	None	none	none	none	none	none	none	none	212965_E12	E12	220075_E12	E12	1	NA	37.656	44	-0.22	129.528	192.25
642	chr1	50992166	50992668	503	sex-indep (robust)	TAD47_chr1	STAT5_sDHS	sex_indep_static (n=64,584)	not_bound	none	0	0	0	0	WE_297	WE	weak_enhancer	enhancer	chr1	50984366	50984368	+	tmeff2	TAD47_chr1	7799	0	0	1	1	1	None	none	none	static	static	none	none	none	212982_E12	E12	220087_E12	E12	1	NA	265.161	293	-0.14	232.071	307.6
643	chr1	51321932	51322547	616	sex-indep (robust)	TAD48_chr1	STAT5_sDHS	sex_indep_static (n=64,584)	not_bound	none	0	0	0	1	WE_298	WE	weak_enhancer	enhancer	chr1	51345969	51345971	+	sdpr	TAD48_chr1	23423	4.14029	2.391	0.602608	-1.65945	1.1125e-08	Female	no_response	none	dDHS_open	static	static	static	static	213009_E5	E5	220114_E6	E6	0	NA	524.046	470	0.16	939.078	672.875
644	chr1	51322789	51323165	377	sex-indep (robust)	TAD48_chr1	STAT5_sDHS	sex_indep_static (n=64,584)	not_bound	none	0	0	0	2	WE_299	WE	weak_enhancer	enhancer	chr1	51345969	51345971	+	sdpr	TAD48_chr1	22805	4.14029	2.391	0.602608	-1.65945	1.1125e-08	Female	no_response	none	dDHS_open	static	static	static	static	213009_E5	E5	220115_E5	E5	1	NA	182.004	203	-0.16	350.805	276.84
645	chr1	51345572	51346374	803	sex-indep (robust)	TAD48_chr1	STAT5_sDHS	sex_indep_static (n=64,584)	not_bound	none	0	0	0	2	WP_42	WP	weak_promoter	promoter	chr1	51345969	51345971	+	sdpr	TAD48_chr1	0	4.14029	2.391	0.602608	-1.65945	1.1125e-08	Female	no_response	none	static	static	static	static	static	213019_E7	E7	220123_E7	E7	1	NA	500.511	471	0.09	604.464	672.875
646	chr1	51346398	51347205	808	Female (standard)	TAD48_chr1	none	female_bias_static (n=1359)	not_bound	none	0	0	0	0	WP_43	WP	weak_promoter	promoter	chr1	51345969	51345971	+	sdpr	TAD48_chr1	428	4.14029	2.391	0.602608	-1.65945	1.1125e-08	Female	no_response	none	none	none	none	none	none	213020_E8	E8	220125_E7	E7	0	NA	191.418	189	0.02	313.026	338.36
647	chr1	51349273	51349552	280	Female (less stringent)	TAD48_chr1	STAT5_sDHS	female_bias_static (n=1359)	not_bound	none	0	0	0	0	WE_300	WE	weak_enhancer	enhancer	chr1	51345969	51345971	+	sdpr	TAD48_chr1	3303	4.14029	2.391	0.602608	-1.65945	1.1125e-08	Female	no_response	none	none	none	none	none	none	213023_E6	E6	220130_E6	E6	1	NA	100.416	124	-0.3	145.719	223.01
648	chr1	51357127	51357603	477	sex-indep (robust)	TAD48_chr1	STAT5_sDHS	sex_indep_static (n=64,584)	not_bound	none	0	0	0	1	WE_301	WE	weak_enhancer	enhancer	chr1	51345969	51345971	+	sdpr	TAD48_chr1	11157	4.14029	2.391	0.602608	-1.65945	1.1125e-08	Female	no_response	none	static	static	static	static	static	213026_E5	E5	220134_E5	E5	1	NA	273.006	211	0.37	356.202	269.15
649	chr1	51390877	51391073	197	sex-indep (standard)	TAD48_chr1	STAT5_sDHS	sex_indep_static (n=64,584)	not_bound	none	0	0	0	2	Insul_66	Insul	insulator	insulator	chr1	51390621	51390623	-	9330175m20rik	TAD48_chr1	255	0	0	1	1	1	None	none	none	static	none	none	none	none	213029_E8	E8	220140_E12	E12	0	NA	72.174	97	-0.43	102.543	115.35
650	chr1	51515983	51516293	311	sex-indep (standard)	TAD49_chr1	STAT5_sDHS	sex_indep_static (n=64,584)	not_bound	none	0	0	0	0	Insul_67	Insul	insulator	insulator	chr1	51535241	51535243	-	nabp1	TAD49_chr1	18949	2.17413	2.83291	1.35568	1.35568	0.0258835	None	none	none	static	none	none	none	none	213033_E1	E1	220150_E12	E12	0	NA	73.743	90	-0.29	151.116	76.9
651	chr1	51534315	51535748	1434	sex-indep (robust)	TAD49_chr1	STAT5_sDHS	sex_indep_static (n=64,584)	not_bound	none	0	0	0	0	Prom_88	Prom	promoter	promoter	chr1	51535241	51535243	-	nabp1	TAD49_chr1	0	2.17413	2.83291	1.35568	1.35568	0.0258835	None	none	none	static	dDHS_open	static	static	static	213039_E7	E7	220159_E7	E7	1	NA	2902.65	3033	-0.06	3049.3	2372.36
652	chr1	51562564	51562802	239	sex-indep (robust)	TAD49_chr1	STAT5_sDHS	sex_indep_static (n=64,584)	not_bound	none	0	0	0	0	WE_302	WE	weak_enhancer	enhancer	chr1	51535452	51535454	+	nc_inter_c1_195	TAD49_chr1	27111	0.117015	0.11003	0.931527	-1.07351	1	None	none	none	static	none	none	static	none	213049_E6	E6	220170_E6	E6	1	NA	191.418	161	0.25	178.101	138.42
653	chr1	51565982	51566315	334	Male (standard)	TAD49_chr1	STAT5_sDHS	male_bias_static (n=1895)	not_bound	none	0	0	0	1	WE_303	WE	weak_enhancer	enhancer	chr1	51535452	51535454	+	nc_inter_c1_195	TAD49_chr1	30529	0.117015	0.11003	0.931527	-1.07351	1	None	none	none	static	dDHS_open	static	static	static	213059_E6	E6	220173_E6	E6	1	NA	467.562	389	0.27	340.011	203.785
654	chr1	51569079	51570249	1171	sex-indep (robust)	TAD49_chr1	STAT5_sDHS	sex_indep_static (n=64,584)	STAT5_bound	common	875	370	622.5	3	Enh_138	Enh	enhancer	enhancer	chr1	51535452	51535454	+	nc_inter_c1_195	TAD49_chr1	33626	0.117015	0.11003	0.931527	-1.07351	1	None	none	none	dDHS_close	static	dDHS_open	dDHS_open	dDHS_open	213065_E6	E6	220179_E5	E5	0	NA	2450.78	2138	0.2	885.108	1580.3
655	chr1	51624075	51624193	119	sex-indep (standard)	TAD49_chr1	none	sex_indep_static (n=64,584)	not_bound	none	0	0	0	0	WE_304	WE	weak_enhancer	enhancer	chr1	51535452	51535454	+	nc_inter_c1_195	TAD49_chr1	88622	0.117015	0.11003	0.931527	-1.07351	1	None	none	none	none	none	none	none	none	213075_E12	E12	220192_E2	E2	0	NA	50.208	35	0.52	37.779	61.52
656	chr1	51641882	51642049	168	sex-indep (standard)	TAD49_chr1	none	sex_indep_static (n=64,584)	not_bound	none	0	0	0	0	WE_305	WE	weak_enhancer	enhancer	chr1	51535452	51535454	+	nc_inter_c1_195	TAD49_chr1	106429	0.117015	0.11003	0.931527	-1.07351	1	None	none	none	none	none	none	none	none	213077_E12	E12	220194_E12	E12	1	NA	36.087	24	0.59	140.322	80.745
657	chr1	51653930	51654109	180	sex-indep (standard)	TAD49_chr1	STAT5_sDHS	sex_indep_static (n=64,584)	not_bound	none	0	0	0	0	Insul_68	Insul	insulator	insulator	chr1	51535452	51535454	+	nc_inter_c1_195	TAD49_chr1	118477	0.117015	0.11003	0.931527	-1.07351	1	None	none	none	static	none	none	none	none	213080_E12	E12	220196_E12	E12	1	NA	73.743	95	-0.37	86.352	80.745
658	chr1	51701375	51701514	140	sex-indep (standard)	TAD50_chr1	STAT5_sDHS	sex_indep_static (n=64,584)	not_bound	none	0	0	0	0	Insul_69	Insul	insulator	insulator	chr1	51972820	51972822	-	myo1b	TAD50_chr1	271307	24.0815	24.0276	1.03538	1.03538	1	sex_indep	none	none	none	none	none	none	none	213081_E2	E2	220200_E2	E2	1	NA	36.087	33	0.13	75.558	46.14
659	chr1	51776861	51777543	683	sex-indep (robust)	TAD50_chr1	STAT5_sDHS	sex_indep_static (n=64,584)	STAT5_bound	common	437	438	437.5	2	WE_306	WE	weak_enhancer	enhancer	chr1	51972820	51972822	-	myo1b	TAD50_chr1	195278	24.0815	24.0276	1.03538	1.03538	1	sex_indep	none	none	static	static	static	static	static	213084_E7	E7	220207_E7	E7	1	NA	2169.93	1369	0.66	1516.56	2341.61
660	chr1	51797148	51797296	149	sex-indep (standard)	TAD50_chr1	none	sex_indep_static (n=64,584)	not_bound	none	0	0	0	0	WE_307	WE	weak_enhancer	enhancer	chr1	51972820	51972822	-	myo1b	TAD50_chr1	175525	24.0815	24.0276	1.03538	1.03538	1	sex_indep	none	none	none	none	none	none	none	213093_E9	E9	220221_E6	E6	0	NA	40.794	27	0.6	59.367	53.83
661	chr1	51797415	51798345	931	sex-indep (robust)	TAD50_chr1	STAT5_sDHS	sex_indep_static (n=64,584)	not_bound	none	0	0	0	1	Enh_139	Enh	enhancer	enhancer	chr1	51972820	51972822	-	myo1b	TAD50_chr1	174476	24.0815	24.0276	1.03538	1.03538	1	sex_indep	none	none	dDHS_close	static	static	static	none	213094_E6	E6	220223_E6	E6	1	NA	914.727	706	0.37	491.127	861.28
662	chr1	51816445	51817014	570	sex-indep (robust)	TAD50_chr1	STAT5_sDHS	sex_indep_static (n=64,584)	STAT5_bound	common	156	194	175	0	Enh_140	Enh	enhancer	enhancer	chr1	51972820	51972822	-	myo1b	TAD50_chr1	155807	24.0815	24.0276	1.03538	1.03538	1	sex_indep	none	none	dDHS_close	static	static	static	dDHS_open	213105_E6	E6	220233_E6	E6	1	NA	990.039	794	0.32	631.449	1434.18
663	chr1	51826152	51826358	207	sex-indep (standard)	TAD50_chr1	none	sex_indep_static (n=64,584)	not_bound	none	0	0	0	0	Enh_141	Enh	enhancer	enhancer	chr1	51972820	51972822	-	myo1b	TAD50_chr1	146463	24.0815	24.0276	1.03538	1.03538	1	sex_indep	none	none	none	none	none	none	none	213117_E6	E6	220239_E9	E9	0	NA	28.242	39	-0.47	37.779	53.83
664	chr1	51826539	51827361	823	sex-indep (robust)	TAD50_chr1	STAT5_sDHS	sex_indep_static (n=64,584)	not_bound	none	0	0	0	0	Enh_142	Enh	enhancer	enhancer	chr1	51972820	51972822	-	myo1b	TAD50_chr1	145460	24.0815	24.0276	1.03538	1.03538	1	sex_indep	none	none	static	static	static	static	static	213119_E6	E6	220240_E6	E6	1	NA	924.141	991	-0.1	933.681	1218.87
665	chr1	51838983	51839202	220	sex-indep (standard)	TAD50_chr1	none	sex_indep_static (n=64,584)	not_bound	none	0	0	0	0	WE_308	WE	weak_enhancer	enhancer	chr1	51972820	51972822	-	myo1b	TAD50_chr1	133619	24.0815	24.0276	1.03538	1.03538	1	sex_indep	none	none	none	none	none	none	none	213127_E14	E14	220251_E6	E6	0	NA	53.346	76	-0.51	129.528	84.59
666	chr1	51872182	51872363	182	sex-indep (standard)	TAD50_chr1	STAT5_sDHS	sex_indep_static (n=64,584)	not_bound	none	0	0	0	0	WE_309	WE	weak_enhancer	enhancer	chr1	51972820	51972822	-	myo1b	TAD50_chr1	100458	24.0815	24.0276	1.03538	1.03538	1	sex_indep	none	none	static	static	none	none	none	213131_E13	E13	220259_E11	E11	0	NA	75.312	106	-0.49	70.161	96.125
667	chr1	51878433	51878752	320	sex-indep (robust)	TAD50_chr1	STAT5_sDHS	sex_indep_static (n=64,584)	not_bound	none	0	0	0	2	WE_310	WE	weak_enhancer	enhancer	chr1	51972820	51972822	-	myo1b	TAD50_chr1	94069	24.0815	24.0276	1.03538	1.03538	1	sex_indep	none	none	static	static	static	static	static	213136_E6	E6	220265_E6	E6	1	NA	123.951	119	0.06	210.483	315.29
668	chr1	51879313	51879656	344	sex-indep (standard)	TAD50_chr1	STAT5_sDHS	sex_indep_static (n=64,584)	not_bound	none	0	0	0	0	WE_311	WE	weak_enhancer	enhancer	chr1	51972820	51972822	-	myo1b	TAD50_chr1	93165	24.0815	24.0276	1.03538	1.03538	1	sex_indep	none	none	static	static	none	none	none	213138_E6	E6	220267_E6	E6	1	NA	116.106	176	-0.6	199.689	296.065
669	chr1	51906479	51906970	492	sex-indep (robust)	TAD50_chr1	STAT5_sDHS	sex_indep_static (n=64,584)	not_bound	none	0	0	0	1	Enh_143	Enh	enhancer	enhancer	chr1	51972820	51972822	-	myo1b	TAD50_chr1	65851	24.0815	24.0276	1.03538	1.03538	1	sex_indep	none	none	static	static	static	static	static	213153_E6	E6	220283_E6	E6	1	NA	514.632	365	0.5	523.509	545.99
670	chr1	51912585	51914119	1535	sex-indep (robust)	TAD50_chr1	STAT5_sDHS	sex_indep_static (n=64,584)	STAT5_bound	common	301	201	251	2	Enh_144	Enh	enhancer	enhancer	chr1	51972820	51972822	-	myo1b	TAD50_chr1	58702	24.0815	24.0276	1.03538	1.03538	1	sex_indep	none	none	static	static	static	static	static	213162_E6	E6	220288_E7	E7	0	NA	1686.67	1629	0.05	1473.38	1514.93
671	chr1	51936234	51936641	408	sex-indep (robust)	TAD50_chr1	none	sex_indep_static (n=64,584)	not_bound	none	0	0	0	0	Enh_145	Enh	enhancer	enhancer	chr1	51972820	51972822	-	myo1b	TAD50_chr1	36180	24.0815	24.0276	1.03538	1.03538	1	sex_indep	none	none	none	none	none	none	none	213181_E6	E6	220307_E6	E6	1	NA	94.14	128	-0.44	210.483	96.125
672	chr1	51939451	51940517	1067	sex-indep (robust)	TAD50_chr1	STAT5_sDHS	sex_indep_static (n=64,584)	STAT5_bound	common	278	248	263	4	Enh_146	Enh	enhancer	enhancer	chr1	51972820	51972822	-	myo1b	TAD50_chr1	32304	24.0815	24.0276	1.03538	1.03538	1	sex_indep	none	none	static	static	dDHS_close	static	static	213185_E6	E6	220313_E6	E6	1	NA	1857.7	2087	-0.17	1991.49	2549.24
673	chr1	51948306	51948599	294	sex-indep (robust)	TAD50_chr1	none	sex_indep_static (n=64,584)	STAT5_bound	common	198	134	166	0	Enh_147	Enh	enhancer	enhancer	chr1	51972820	51972822	-	myo1b	TAD50_chr1	24222	24.0815	24.0276	1.03538	1.03538	1	sex_indep	none	none	none	none	none	none	none	213191_E6	E6	220323_E6	E6	1	NA	142.779	132	0.11	178.101	211.475
674	chr1	51948875	51949633	759	sex-indep (robust)	TAD50_chr1	none	sex_indep_static (n=64,584)	STAT5_bound	common	198	134	166	0	Enh_148	Enh	enhancer	enhancer	chr1	51972820	51972822	-	myo1b	TAD50_chr1	23188	24.0815	24.0276	1.03538	1.03538	1	sex_indep	none	none	static	static	static	static	static	213193_E6	E6	220325_E6	E6	1	NA	287.127	397	-0.47	539.7	522.92
675	chr1	51950494	51951373	880	sex-indep (robust)	TAD50_chr1	STAT5_sDHS	sex_indep_static (n=64,584)	not_bound	none	0	0	0	1	Prom_89	Prom	promoter	promoter	chr1	51972820	51972822	-	myo1b	TAD50_chr1	21448	24.0815	24.0276	1.03538	1.03538	1	sex_indep	none	none	static	static	none	none	none	213196_E7	E7	220330_E7	E7	1	NA	735.861	837	-0.19	442.554	826.675
676	chr1	51952712	51953510	799	sex-indep (robust)	TAD50_chr1	STAT5_sDHS	sex_indep_static (n=64,584)	STAT5_bound	common	131	138	134.5	0	Prom_90	Prom	promoter	promoter	chr1	51972820	51972822	-	myo1b	TAD50_chr1	19311	24.0815	24.0276	1.03538	1.03538	1	sex_indep	none	none	dDHS_close	static	static	static	dDHS_open	213200_E7	E7	220332_E7	E7	1	NA	1239.51	1592	-0.36	787.962	1561.07
677	chr1	51968307	51968530	224	sex-indep (robust)	TAD50_chr1	none	sex_indep_static (n=64,584)	not_bound	none	0	0	0	0	WE_312	WE	weak_enhancer	enhancer	chr1	51972820	51972822	-	myo1b	TAD50_chr1	4291	24.0815	24.0276	1.03538	1.03538	1	sex_indep	none	none	none	none	none	none	none	213217_E5	E5	220345_E11	E11	0	NA	59.622	42	0.51	107.94	115.35
678	chr1	51971868	51973365	1498	sex-indep (robust)	TAD50_chr1	STAT5_sDHS	sex_indep_static (n=64,584)	not_bound	none	0	0	0	2	WP_44	WP	weak_promoter	promoter	chr1	51972820	51972822	-	myo1b	TAD50_chr1	0	24.0815	24.0276	1.03538	1.03538	1	sex_indep	none	none	static	static	static	static	static	213225_E7	E7	220351_E7	E7	1	NA	607.203	750	-0.3	998.445	422.95
679	chr1	51979767	51979961	195	sex-indep (robust)	TAD50_chr1	STAT5_sDHS	sex_indep_static (n=64,584)	not_bound	none	0	0	0	2	WE_313	WE	weak_enhancer	enhancer	chr1	51972820	51972822	-	myo1b	TAD50_chr1	6946	24.0815	24.0276	1.03538	1.03538	1	sex_indep	none	none	static	static	none	none	static	213230_E12	E12	220358_E11	E11	0	NA	86.295	62	0.48	86.352	69.21
680	chr1	52053636	52053942	307	sex-indep (standard)	TAD51_chr1	STAT5_sDHS	sex_indep_static (n=64,584)	not_bound	none	0	0	0	0	WE_314	WE	weak_enhancer	enhancer	chr1	52065087	52065089	+	stat4	TAD51_chr1	11146	0.0619936	0.0354476	0.596433	-1.67663	0.861185	None	none	none	static	static	none	none	none	213242_E12	E12	220368_E12	E12	1	NA	109.83	104	0.08	134.925	142.265
681	chr1	52157432	52157646	215	sex-indep (standard)	TAD51_chr1	STAT5_sDHS	sex_indep_static (n=64,584)	not_bound	none	0	0	0	0	Insul_70	Insul	insulator	insulator	chr1	52170684	52170686	-	nc_as_c1_197	TAD51_chr1	13039	0.746997	0.720716	0.95446	-1.04771	1	None	none	none	none	none	none	none	none	213260_E12	E12	220385_E13	E13	0	NA	54.915	60	-0.13	145.719	73.055
682	chr1	52170260	52171007	748	sex-indep (robust)	TAD51_chr1	STAT5_sDHS	sex_indep_static (n=64,584)	STAT5_bound	common	630	562	596	2	Enh_149	Enh	enhancer	enhancer	chr1	52170684	52170686	-	nc_as_c1_197	TAD51_chr1	0	0.746997	0.720716	0.95446	-1.04771	1	None	none	none	static	static	static	static	static	213267_E7	E7	220390_E5	E5	0	NA	1595.67	1753	-0.14	1770.22	1491.86
683	chr1	52175919	52176872	954	sex-indep (robust)	TAD51_chr1	STAT5_sDHS	sex_indep_static (n=64,584)	STAT5_bound	common	216	94	155	1	Prom_91	Prom	promoter	promoter	chr1	52176281	52176283	+	stat1	TAD51_chr1	0	7.92856	4.45305	0.583402	-1.71408	0.0143514	Female	no_response	none	static	static	static	dDHS_open	static	213276_E7	E7	220396_E7	E7	1	NA	1377.58	1226	0.17	1133.37	949.715
684	chr1	52211713	52212017	305	sex-indep (standard)	TAD52_chr1	none	sex_indep_static (n=64,584)	not_bound	none	0	0	0	0	WE_315	WE	weak_enhancer	enhancer	chr1	52290074	52290076	-	gls	TAD52_chr1	78058	0.706303	0.470447	0.697105	-1.4345	0.020811	None	none	none	none	none	none	none	none	213282_E14	E14	220407_E14	E14	1	NA	51.777	60	-0.21	124.131	65.365
685	chr1	52215215	52215739	525	sex-indep (standard)	TAD52_chr1	STAT5_sDHS	sex_indep_static (n=64,584)	not_bound	none	0	0	0	0	WE_316	WE	weak_enhancer	enhancer	chr1	52290074	52290076	-	gls	TAD52_chr1	74336	0.706303	0.470447	0.697105	-1.4345	0.020811	None	none	none	none	none	none	none	none	213286_E6	E6	220409_E6	E6	1	NA	128.658	132	-0.04	248.262	153.8
686	chr1	52220611	52220863	253	sex-indep (robust)	TAD52_chr1	STAT5_sDHS	sex_indep_static (n=64,584)	not_bound	none	0	0	0	1	WE_317	WE	weak_enhancer	enhancer	chr1	52290074	52290076	-	gls	TAD52_chr1	69212	0.706303	0.470447	0.697105	-1.4345	0.020811	None	none	none	static	static	none	none	none	213292_E11	E11	220414_E11	E11	1	NA	133.365	126	0.08	118.734	169.18
687	chr1	52289219	52290642	1424	sex-indep (robust)	TAD52_chr1	STAT5_sDHS	sex_indep_static (n=64,584)	not_bound	none	0	0	0	2	WP_45	WP	weak_promoter	promoter	chr1	52290074	52290076	-	gls	TAD52_chr1	0	0.706303	0.470447	0.697105	-1.4345	0.020811	None	none	none	static	static	static	static	static	213309_E7	E7	220431_E7	E7	1	NA	1219.11	1293	-0.08	1689.26	1038.15
688	chr1	52484854	52485269	416	sex-indep (robust)	TAD53_chr1	STAT5_sDHS	sex_indep_static (n=64,584)	not_bound	none	0	0	0	0	WE_318	WE	weak_enhancer	enhancer	chr1	52557290	52557292	-	nab1	TAD53_chr1	72022	6.84195	6.5367	0.993587	-1.00645	1	sex_indep	none	none	static	static	none	none	none	213329_E5	E5	220450_E5	E5	1	NA	232.212	293	-0.34	215.88	322.98
689	chr1	52490975	52491199	225	sex-indep (robust)	TAD53_chr1	STAT5_sDHS	sex_indep_static (n=64,584)	not_bound	none	0	0	0	0	Enh_150	Enh	enhancer	enhancer	chr1	52557290	52557292	-	nab1	TAD53_chr1	66092	6.84195	6.5367	0.993587	-1.00645	1	sex_indep	none	none	static	static	none	none	none	213332_E6	E6	220454_E8	E8	0	NA	131.796	146	-0.15	70.161	142.265
690	chr1	52522654	52523198	545	sex-indep (robust)	TAD53_chr1	STAT5_sDHS	sex_indep_static (n=64,584)	STAT5_bound	common	156	126	141	0	Enh_151	Enh	enhancer	enhancer	chr1	52557290	52557292	-	nab1	TAD53_chr1	34093	6.84195	6.5367	0.993587	-1.00645	1	sex_indep	none	none	dDHS_close	static	static	static	static	213341_E6	E6	220461_E6	E6	1	NA	977.487	872	0.16	647.64	1138.12
691	chr1	52523612	52523883	272	sex-indep (standard)	TAD53_chr1	none	sex_indep_static (n=64,584)	STAT5_bound	common	129	108	118.5	2	Enh_152	Enh	enhancer	enhancer	chr1	52557290	52557292	-	nab1	TAD53_chr1	33408	6.84195	6.5367	0.993587	-1.00645	1	sex_indep	none	none	none	none	none	none	none	213343_E6	E6	220463_E6	E6	1	NA	131.796	109	0.27	80.955	115.35
692	chr1	52540906	52541164	259	sex-indep (robust)	TAD53_chr1	STAT5_sDHS	sex_indep_static (n=64,584)	not_bound	none	0	0	0	0	WE_319	WE	weak_enhancer	enhancer	chr1	52557290	52557292	-	nab1	TAD53_chr1	16127	6.84195	6.5367	0.993587	-1.00645	1	sex_indep	none	none	none	static	none	none	none	213360_E10	E10	220477_E11	E11	0	NA	128.658	127	0.02	113.337	161.49
693	chr1	52552435	52552775	341	sex-indep (robust)	TAD53_chr1	STAT5_sDHS	sex_indep_static (n=64,584)	not_bound	none	0	0	0	0	Enh_153	Enh	enhancer	enhancer	chr1	52557290	52557292	-	nab1	TAD53_chr1	4516	6.84195	6.5367	0.993587	-1.00645	1	sex_indep	none	none	static	static	none	none	static	213368_E6	E6	220485_E6	E6	1	NA	334.197	330	0.02	167.307	426.795
694	chr1	52556387	52557922	1536	sex-indep (robust)	TAD53_chr1	STAT5_sDHS	sex_indep_static (n=64,584)	not_bound	none	0	0	0	2	Prom_92	Prom	promoter	promoter	chr1	52557290	52557292	-	nab1	TAD53_chr1	0	6.84195	6.5367	0.993587	-1.00645	1	sex_indep	none	none	static	static	static	static	static	213373_E7	E7	220488_E7	E7	1	NA	1666.28	1742	-0.06	1635.29	1053.53
695	chr1	52558596	52558903	308	sex-indep (robust)	TAD53_chr1	STAT5_hi_dDHS	sex_indep_dynamic (n=1532)	STAT5_bound	common	70	51	60.5	1	Enh_154	Enh	enhancer	enhancer	chr1	52557290	52557292	-	nab1	TAD53_chr1	1305	6.84195	6.5367	0.993587	-1.00645	1	sex_indep	none	none	static	none	static	static	static	213377_E6	E6	220493_E6	E6	1	0	290.265	138	1.07	194.292	261.46
696	chr1	52654217	52654421	205	sex-indep (standard)	TAD53_chr1	none	sex_indep_static (n=64,584)	not_bound	none	0	0	0	0	WE_320	WE	weak_enhancer	enhancer	chr1	52687548	52687550	+	tmem194b	TAD53_chr1	33128	0.165803	0.134628	0.837327	-1.19428	1	None	none	none	none	none	none	none	none	213386_E12	E12	220501_E12	E12	1	NA	29.811	24	0.31	48.573	34.605
697	chr1	52687313	52687784	472	sex-indep (robust)	TAD53_chr1	STAT5_sDHS	sex_indep_static (n=64,584)	not_bound	none	0	0	0	0	Prom_93	Prom	promoter	promoter	chr1	52687548	52687550	+	tmem194b	TAD53_chr1	0	0.165803	0.134628	0.837327	-1.19428	1	None	none	none	static	static	static	static	static	213392_E7	E7	220515_E7	E7	1	NA	376.56	402	-0.09	442.554	219.165
698	chr1	52783937	52784243	307	sex-indep (standard)	TAD54_chr1	STAT5_sDHS	sex_indep_static (n=64,584)	not_bound	none	0	0	0	0	Insul_71	Insul	insulator	insulator	chr1	52784160	52784162	-	mfsd6	TAD54_chr1	0	1.10698	1.24675	1.17249	1.17249	0.502605	sex_indep	none	none	static	none	none	none	none	213407_E8	E8	220531_E12	E12	0	NA	150.624	154	-0.03	134.925	92.28
699	chr1	52806829	52807249	421	sex-indep (robust)	TAD54_chr1	STAT5_sDHS	sex_indep_static (n=64,584)	not_bound	none	0	0	0	0	WE_321	WE	weak_enhancer	enhancer	chr1	52784160	52784162	-	mfsd6	TAD54_chr1	22668	1.10698	1.24675	1.17249	1.17249	0.502605	sex_indep	none	none	static	static	static	static	static	213414_E6	E6	220537_E6	E6	1	NA	444.027	517	-0.22	469.539	622.89
700	chr1	52822666	52822919	254	sex-indep (standard)	TAD54_chr1	STAT5_sDHS	sex_indep_static (n=64,584)	not_bound	none	0	0	0	2	WE_322	WE	weak_enhancer	enhancer	chr1	52784160	52784162	-	mfsd6	TAD54_chr1	38505	1.10698	1.24675	1.17249	1.17249	0.502605	sex_indep	none	none	static	static	none	none	none	213418_E5	E5	220542_E6	E6	0	NA	111.399	91	0.29	75.558	188.405
701	chr1	52857281	52857453	173	sex-indep (standard)	TAD54_chr1	STAT5_sDHS	sex_indep_static (n=64,584)	not_bound	none	0	0	0	0	Enh_155	Enh	enhancer	enhancer	chr1	52874530	52874532	-	inpp1	TAD54_chr1	17078	2.04326	1.96702	1.00327	1.00327	1	sex_indep	none	none	none	none	none	none	none	213432_E6	E6	220557_E6	E6	1	NA	70.605	66	0.1	118.734	73.055
702	chr1	52861878	52862213	336	sex-indep (robust)	TAD54_chr1	STAT5_hi_dDHS	sex_indep_dynamic (n=1532)	STAT5_bound	common	712	830	771	2	WE_323	WE	weak_enhancer	enhancer	chr1	52874530	52874532	-	inpp1	TAD54_chr1	12318	2.04326	1.96702	1.00327	1.00327	1	sex_indep	none	none	static	static	static	static	none	213437_E6	E6	220564_E6	E6	1	0	313.8	123	1.35	113.337	253.77
703	chr1	52873566	52874837	1272	sex-indep (robust)	TAD54_chr1	STAT5_sDHS	sex_indep_static (n=64,584)	not_bound	none	0	0	0	0	Prom_94	Prom	promoter	promoter	chr1	52874530	52874532	-	inpp1	TAD54_chr1	0	2.04326	1.96702	1.00327	1.00327	1	sex_indep	none	none	static	static	static	static	static	213447_E7	E7	220579_E7	E7	1	NA	1016.71	1083	-0.09	895.902	826.675
704	chr1	52901548	52902572	1025	sex-indep (standard)	TAD54_chr1	STAT5_sDHS	sex_indep_static (n=64,584)	not_bound	none	0	0	0	2	Prom_95	Prom	promoter	promoter	chr1	52901889	52901891	+	hibch	TAD54_chr1	0	27.1709	23.3696	0.892559	-1.12037	0.433376	sex_indep	none	none	static	static	static	static	static	213456_E7	E7	220589_E7	E7	1	NA	2439.8	2631	-0.11	2390.87	2187.8
705	chr1	52903502	52903687	186	sex-indep (standard)	TAD54_chr1	none	sex_indep_static (n=64,584)	not_bound	none	0	0	0	0	WP_46	WP	weak_promoter	promoter	chr1	52901889	52901891	+	hibch	TAD54_chr1	1612	27.1709	23.3696	0.892559	-1.12037	0.433376	sex_indep	none	none	none	none	none	none	none	213457_E8	E8	220592_E6	E6	0	NA	73.743	67	0.14	75.558	107.66
706	chr1	52906268	52906939	672	sex-indep (robust)	TAD54_chr1	STAT5_sDHS	sex_indep_static (n=64,584)	not_bound	none	0	0	0	0	Enh_156	Enh	enhancer	enhancer	chr1	52901889	52901891	+	hibch	TAD54_chr1	4378	27.1709	23.3696	0.892559	-1.12037	0.433376	sex_indep	none	none	static	static	static	static	static	213459_E6	E6	220596_E6	E6	1	NA	673.101	883	-0.39	653.037	961.25
707	chr1	53115626	53116513	888	Female (less stringent)	TAD54_chr1	STAT5_sDHS	female_bias_static (n=1359)	not_bound	none	0	0	0	0	WE_324	WE	weak_enhancer	enhancer	chr1	53118506	53118508	+	mstn	TAD54_chr1	1994	0.00438271	0.00766811	1.76293	1.76293	1	None	none	none	static	static	none	none	none	213491_E9	E9	220634_E6	E6	0	NA	354.594	469	-0.4	264.453	453.71
708	chr1	53117257	53117704	448	sex-indep (robust)	TAD54_chr1	STAT5_sDHS	sex_indep_static (n=64,584)	STAT5_bound	common	86	71	78.5	1	WE_325	WE	weak_enhancer	enhancer	chr1	53118506	53118508	+	mstn	TAD54_chr1	803	0.00438271	0.00766811	1.76293	1.76293	1	None	none	none	static	static	none	none	none	213492_E6	E6	220636_E6	E6	1	NA	338.904	276	0.3	86.352	384.5
709	chr1	53127082	53127886	805	sex-indep (robust)	TAD54_chr1	STAT5_sDHS	sex_indep_static (n=64,584)	STAT5_bound	common	214	176	195	3	Enh_157	Enh	enhancer	enhancer	chr1	53118506	53118508	+	mstn	TAD54_chr1	8575	0.00438271	0.00766811	1.76293	1.76293	1	None	none	none	dDHS_close	dDHS_close	static	static	static	213497_E6	E6	220648_E6	E6	1	NA	1043.38	1189	-0.19	404.775	1484.17
710	chr1	53142086	53142418	333	sex-indep (robust)	TAD54_chr1	STAT5_sDHS	sex_indep_static (n=64,584)	not_bound	none	0	0	0	0	WE_326	WE	weak_enhancer	enhancer	chr1	53118506	53118508	+	mstn	TAD54_chr1	23579	0.00438271	0.00766811	1.76293	1.76293	1	None	none	none	static	static	none	none	none	213508_E5	E5	220654_E12	E12	0	NA	108.261	124	-0.2	118.734	226.855
711	chr1	53348104	53348462	359	Male (standard)	TAD54_chr1	STAT5_sDHS	male_bias_static (n=1895)	STAT5_bound	common	668	606	637	3	Enh_158	Enh	enhancer	enhancer	chr1	53353838	53353840	-	pms1	TAD54_chr1	5377	0.900106	1.30325	1.48333	1.48333	0.00567848	None	none	none	static	static	static	static	static	213548_E6	E6	220703_E6	E6	1	NA	487.959	326	0.58	291.438	465.245
712	chr1	53353461	53354326	866	sex-indep (robust)	TAD54_chr1	STAT5_sDHS	sex_indep_static (n=64,584)	not_bound	none	0	0	0	0	Prom_96	Prom	promoter	promoter	chr1	53353838	53353840	-	pms1	TAD54_chr1	0	0.900106	1.30325	1.48333	1.48333	0.00567848	None	none	none	static	static	static	static	static	213554_E5	E5	220712_E7	E7	0	NA	1612.93	1589	0.02	1629.89	1188.11
713	chr1	53370098	53370885	788	sex-indep (robust)	TAD54_chr1	STAT5_sDHS	sex_indep_static (n=64,584)	not_bound	none	0	0	0	0	Prom_97	Prom	promoter	promoter	chr1	53370467	53370469	+	osgepl1	TAD54_chr1	0	4.74887	4.94544	1.07924	1.07924	0.978285	sex_indep	none	none	static	static	static	static	static	213569_E7	E7	220727_E7	E7	1	NA	988.47	1042	-0.08	787.962	803.605
714	chr1	53409191	53409809	619	sex-indep (robust)	TAD54_chr1	STAT5_sDHS	sex_indep_static (n=64,584)	not_bound	none	0	0	0	0	WP_47	WP	weak_promoter	promoter	chr1	53409594	53409596	-	asnsd1	TAD54_chr1	0	8.9428	9.08979	1.05561	1.05561	1	sex_indep	none	none	static	static	static	static	static	213583_E7	E7	220740_E7	E7	1	NA	858.243	970	-0.18	1020.03	822.83
715	chr1	53841142	53842506	1365	sex-indep (robust)	TAD55_chr1	STAT5_sDHS	sex_indep_static (n=64,584)	not_bound	none	0	0	0	1	Prom_98	Prom	promoter	promoter	chr1	53842057	53842059	-	stk17b	TAD55_chr1	0	1.47808	1.13277	0.803426	-1.24467	0.334422	None	none	none	static	static	static	static	static	213623_E7	E7	220781_E8	E8	0	NA	878.64	986	-0.17	1041.62	803.605
716	chr1	53908270	53908511	242	sex-indep (robust)	TAD55_chr1	STAT5_sDHS	sex_indep_static (n=64,584)	not_bound	none	0	0	0	0	WE_327	WE	weak_enhancer	enhancer	chr1	53906267	53906269	+	mir7681	TAD55_chr1	2002	0	0	1	1	1	None	none	none	static	static	static	dDHS_open	static	213633_E5	E5	220791_E5	E5	1	NA	214.953	200	0.1	280.644	226.855
717	chr1	54031811	54032122	312	sex-indep (standard)	TAD55_chr1	STAT5_sDHS	sex_indep_static (n=64,584)	not_bound	none	0	0	0	1	WE_328	WE	weak_enhancer	enhancer	chr1	53906267	53906269	+	mir7681	TAD55_chr1	125543	0	0	1	1	1	None	none	none	none	static	none	none	none	213641_E2	E2	220805_E5	E5	0	NA	98.847	75	0.4	124.131	107.66
718	chr1	54035082	54035675	594	sex-indep (robust)	TAD55_chr1	STAT5_sDHS	sex_indep_static (n=64,584)	not_bound	none	0	0	0	2	WE_329	WE	weak_enhancer	enhancer	chr1	53906267	53906269	+	mir7681	TAD55_chr1	128814	0	0	1	1	1	None	none	none	static	static	none	none	none	213643_E5	E5	220809_E12	E12	0	NA	183.573	216	-0.23	286.041	319.135
719	chr1	54062928	54063271	344	sex-indep (robust)	TAD55_chr1	STAT5_sDHS	sex_indep_static (n=64,584)	not_bound	none	0	0	0	0	WE_330	WE	weak_enhancer	enhancer	chr1	53906267	53906269	+	mir7681	TAD55_chr1	156660	0	0	1	1	1	None	none	none	static	static	static	static	static	213648_E5	E5	220815_E5	E5	1	NA	203.97	156	0.39	259.056	238.39
720	chr1	54074623	54075019	397	sex-indep (robust)	TAD55_chr1	STAT5_sDHS	sex_indep_static (n=64,584)	not_bound	none	0	0	0	1	WE_331	WE	weak_enhancer	enhancer	chr1	53906267	53906269	+	mir7681	TAD55_chr1	168355	0	0	1	1	1	None	none	none	static	static	static	static	static	213656_E5	E5	220822_E5	E5	1	NA	196.125	188	0.06	280.644	242.235
721	chr1	54103852	54104082	231	sex-indep (standard)	TAD55_chr1	STAT5_sDHS	sex_indep_static (n=64,584)	not_bound	none	0	0	0	2	WE_332	WE	weak_enhancer	enhancer	chr1	54251876	54251878	-	hecw2	TAD55_chr1	147795	0.258287	0.188298	0.763531	-1.30971	0.157128	None	none	none	none	none	none	none	none	213661_E12	E12	220827_E3	E3	0	NA	62.76	69	-0.14	75.558	126.885
722	chr1	54307249	54307982	734	sex-indep (robust)	TAD55_chr1	STAT5_sDHS	sex_indep_static (n=64,584)	not_bound	none	0	0	0	1	Insul_72	Insul	insulator	insulator	chr1	54307526	54307528	+	ccdc150	TAD55_chr1	0	0	0.00410359	6.31323	6.31323	1	None	none	none	static	static	static	static	static	213677_E12	E12	220850_E12	E12	1	NA	748.413	838	-0.16	960.666	903.575
723	chr1	54495551	54496029	479	sex-indep (robust)	TAD56_chr1	STAT5_sDHS	sex_indep_static (n=64,584)	not_bound	none	0	0	0	2	Prom_99	Prom	promoter	promoter	chr1	54495813	54495815	-	gtf3c3	TAD56_chr1	0	2.06702	2.16479	1.09327	1.09327	0.977579	sex_indep	none	none	static	static	static	static	static	213696_E7	E7	220875_E7	E7	1	NA	351.456	384	-0.13	313.026	196.095
724	chr1	54580653	54580866	214	sex-indep (standard)	TAD56_chr1	STAT5_sDHS	sex_indep_static (n=64,584)	not_bound	none	0	0	0	0	WE_333	WE	weak_enhancer	enhancer	chr1	54614526	54614528	-	pgap1	TAD56_chr1	33661	1.23097	0.963869	0.81552	-1.22621	0.150589	None	none	none	static	static	static	static	none	213714_E5	E5	220898_E5	E5	1	NA	171.021	176	-0.04	161.91	180.715
725	chr1	54599838	54600103	266	sex-indep (robust)	TAD56_chr1	STAT5_sDHS	sex_indep_static (n=64,584)	STAT5_bound	male_enriched	339	74	206.5	0	WE_334	WE	weak_enhancer	enhancer	chr1	54614526	54614528	-	pgap1	TAD56_chr1	14424	1.23097	0.963869	0.81552	-1.22621	0.150589	None	none	none	static	static	static	none	none	213725_E6	E6	220903_E6	E6	1	NA	382.836	224	0.77	124.131	311.445
726	chr1	54601991	54602889	899	sex-indep (robust)	TAD56_chr1	STAT5_sDHS	sex_indep_static (n=64,584)	STAT5_bound	common	598	265	431.5	0	WE_335	WE	weak_enhancer	enhancer	chr1	54614526	54614528	-	pgap1	TAD56_chr1	11638	1.23097	0.963869	0.81552	-1.22621	0.150589	None	none	none	dDHS_close	static	dDHS_open	dDHS_open	static	213729_E6	E6	220906_E6	E6	1	NA	1554.88	1588	-0.03	550.494	1476.48
727	chr1	54613659	54615092	1434	sex-indep (robust)	TAD56_chr1	STAT5_sDHS	sex_indep_static (n=64,584)	not_bound	none	0	0	0	2	Prom_100	Prom	promoter	promoter	chr1	54614526	54614528	-	pgap1	TAD56_chr1	0	1.23097	0.963869	0.81552	-1.22621	0.150589	None	none	none	static	static	static	static	static	213737_E7	E7	220912_E7	E7	1	NA	1372.88	1401	-0.03	1295.28	1130.43
728	chr1	54671523	54672339	817	sex-indep (robust)	TAD56_chr1	STAT5_hi_dDHS	sex_indep_dynamic (n=1532)	STAT5_bound	common	978	838	908	3	WE_336	WE	weak_enhancer	enhancer	chr1	54614526	54614528	-	pgap1	TAD56_chr1	56996	1.23097	0.963869	0.81552	-1.22621	0.150589	None	none	none	dDHS_close	dDHS_close	dDHS_open	dDHS_open	dDHS_open	213746_E6	E6	220921_E6	E6	1	1111	1390.13	349	1.99	291.438	945.87
729	chr1	54741087	54741894	808	sex-indep (robust)	TAD56_chr1	STAT5_sDHS	sex_indep_static (n=64,584)	STAT5_bound	common	492	331	411.5	2	WE_337	WE	weak_enhancer	enhancer	chr1	54614526	54614528	-	pgap1	TAD56_chr1	126560	1.23097	0.963869	0.81552	-1.22621	0.150589	None	none	none	static	static	static	static	static	213759_E6	E6	220931_E5	E5	0	NA	878.64	557	0.66	496.524	830.52
730	chr1	54747507	54747803	297	sex-indep (robust)	TAD56_chr1	STAT5_sDHS	sex_indep_static (n=64,584)	not_bound	none	0	0	0	0	WE_338	WE	weak_enhancer	enhancer	chr1	54614526	54614528	-	pgap1	TAD56_chr1	132980	1.23097	0.963869	0.81552	-1.22621	0.150589	None	none	none	static	static	none	none	none	213763_E5	E5	220938_E5	E5	1	NA	150.624	149	0.02	205.086	215.32
731	chr1	54797820	54798194	375	sex-indep (robust)	TAD56_chr1	STAT5_sDHS	sex_indep_static (n=64,584)	not_bound	none	0	0	0	0	WE_339	WE	weak_enhancer	enhancer	chr1	54614526	54614528	-	pgap1	TAD56_chr1	183293	1.23097	0.963869	0.81552	-1.22621	0.150589	None	none	none	none	none	none	none	none	213769_E5	E5	220946_E5	E5	1	NA	127.089	103	0.3	161.91	123.04
732	chr1	54806485	54806722	238	sex-indep (standard)	TAD56_chr1	none	sex_indep_static (n=64,584)	not_bound	none	0	0	0	0	WE_340	WE	weak_enhancer	enhancer	chr1	54983229	54983231	-	ankrd44	TAD56_chr1	176508	0.597972	0.442082	0.771618	-1.29598	0.134425	None	none	none	none	none	none	none	none	213771_E5	E5	220951_E5	E5	1	NA	58.053	55	0.08	86.352	76.9
733	chr1	54806895	54807115	221	sex-indep (robust)	TAD56_chr1	none	sex_indep_static (n=64,584)	not_bound	none	0	0	0	0	WE_341	WE	weak_enhancer	enhancer	chr1	54983229	54983231	-	ankrd44	TAD56_chr1	176115	0.597972	0.442082	0.771618	-1.29598	0.134425	None	none	none	none	none	none	none	none	213771_E5	E5	220952_E10	E10	0	NA	51.777	63	-0.28	124.131	96.125
734	chr1	54822721	54823139	419	sex-indep (robust)	TAD56_chr1	STAT5_sDHS	sex_indep_static (n=64,584)	not_bound	none	0	0	0	2	WE_342	WE	weak_enhancer	enhancer	chr1	54983229	54983231	-	ankrd44	TAD56_chr1	160091	0.597972	0.442082	0.771618	-1.29598	0.134425	None	none	none	static	static	none	none	static	213776_E5	E5	220960_E6	E6	0	NA	123.951	148	-0.26	183.498	215.32
735	chr1	54828363	54828631	269	sex-indep (robust)	TAD56_chr1	STAT5_sDHS	sex_indep_static (n=64,584)	not_bound	none	0	0	0	0	WE_343	WE	weak_enhancer	enhancer	chr1	54983229	54983231	-	ankrd44	TAD56_chr1	154599	0.597972	0.442082	0.771618	-1.29598	0.134425	None	none	none	none	static	none	none	none	213780_E5	E5	220963_E11	E11	0	NA	94.14	82	0.2	102.543	176.87
736	chr1	54872210	54872565	356	sex-indep (robust)	TAD56_chr1	STAT5_sDHS	sex_indep_static (n=64,584)	not_bound	none	0	0	0	0	WE_344	WE	weak_enhancer	enhancer	chr1	54983229	54983231	-	ankrd44	TAD56_chr1	110665	0.597972	0.442082	0.771618	-1.29598	0.134425	None	none	none	static	static	none	none	none	213791_E11	E11	220975_E11	E11	1	NA	149.055	152	-0.03	178.101	223.01
737	chr1	54881137	54881240	104	sex-indep (standard)	TAD56_chr1	none	sex_indep_static (n=64,584)	not_bound	none	0	0	0	0	WE_345	WE	weak_enhancer	enhancer	chr1	54983229	54983231	-	ankrd44	TAD56_chr1	101990	0.597972	0.442082	0.771618	-1.29598	0.134425	None	none	none	none	none	none	none	none	213792_E13	E13	220980_E12	E12	0	NA	25.104	9	1.48	26.985	38.45
738	chr1	54882945	54884060	1116	sex-indep (robust)	TAD56_chr1	STAT5_sDHS	sex_indep_static (n=64,584)	STAT5_bound	common	75	54	64.5	0	WE_346	WE	weak_enhancer	enhancer	chr1	54983229	54983231	-	ankrd44	TAD56_chr1	99170	0.597972	0.442082	0.771618	-1.29598	0.134425	None	none	none	static	static	dDHS_open	dDHS_open	dDHS_open	213794_E5	E5	220985_E5	E5	1	NA	1021.42	942	0.12	1306.07	1695.64
739	chr1	54887138	54887318	181	sex-indep (standard)	TAD56_chr1	none	sex_indep_static (n=64,584)	not_bound	none	0	0	0	0	WE_347	WE	weak_enhancer	enhancer	chr1	54983229	54983231	-	ankrd44	TAD56_chr1	95912	0.597972	0.442082	0.771618	-1.29598	0.134425	None	none	none	none	none	none	none	none	213795_E13	E13	220988_E11	E11	0	NA	14.121	29	-1.04	86.352	61.52
740	chr1	54894620	54895229	610	sex-indep (robust)	TAD56_chr1	STAT5_sDHS	sex_indep_static (n=64,584)	not_bound	none	0	0	0	0	WE_348	WE	weak_enhancer	enhancer	chr1	54983229	54983231	-	ankrd44	TAD56_chr1	88001	0.597972	0.442082	0.771618	-1.29598	0.134425	None	none	none	static	none	static	static	static	213799_E5	E5	220992_E5	E5	1	NA	188.28	160	0.23	361.599	192.25
741	chr1	54896854	54897211	358	sex-indep (robust)	TAD56_chr1	STAT5_sDHS	sex_indep_static (n=64,584)	not_bound	none	0	0	0	0	WE_349	WE	weak_enhancer	enhancer	chr1	54983229	54983231	-	ankrd44	TAD56_chr1	86019	0.597972	0.442082	0.771618	-1.29598	0.134425	None	none	none	static	none	none	none	none	213800_E10	E10	220994_E5	E5	0	NA	122.382	115	0.09	194.292	180.715
742	chr1	54907008	54907314	307	sex-indep (robust)	TAD56_chr1	STAT5_sDHS	sex_indep_static (n=64,584)	not_bound	none	0	0	0	0	Enh_159	Enh	enhancer	enhancer	chr1	54983229	54983231	-	ankrd44	TAD56_chr1	75916	0.597972	0.442082	0.771618	-1.29598	0.134425	None	none	none	none	static	none	none	none	213806_E6	E6	221003_E8	E8	0	NA	84.726	91	-0.1	107.94	103.815
743	chr1	54910515	54910859	345	Female (less stringent)	TAD56_chr1	STAT5_sDHS	female_bias_static (n=1359)	not_bound	none	0	0	0	0	WE_350	WE	weak_enhancer	enhancer	chr1	54983229	54983231	-	ankrd44	TAD56_chr1	72371	0.597972	0.442082	0.771618	-1.29598	0.134425	None	none	none	none	none	none	none	none	213811_E6	E6	221008_E6	E6	1	NA	97.278	110	-0.18	134.925	138.42
744	chr1	54916848	54917043	196	sex-indep (standard)	TAD56_chr1	none	sex_indep_static (n=64,584)	not_bound	none	0	0	0	0	WE_351	WE	weak_enhancer	enhancer	chr1	54983229	54983231	-	ankrd44	TAD56_chr1	66187	0.597972	0.442082	0.771618	-1.29598	0.134425	None	none	none	static	static	static	static	static	213814_E9	E9	221014_E6	E6	0	NA	36.087	42	-0.22	80.955	76.9
745	chr1	54959736	54960012	277	sex-indep (standard)	TAD56_chr1	none	sex_indep_static (n=64,584)	not_bound	none	0	0	0	2	WE_352	WE	weak_enhancer	enhancer	chr1	54983229	54983231	-	ankrd44	TAD56_chr1	23218	0.597972	0.442082	0.771618	-1.29598	0.134425	None	none	none	none	none	none	none	none	213824_E11	E11	221037_E11	E11	1	NA	87.864	51	0.78	59.367	61.52
746	chr1	54970325	54970587	263	sex-indep (standard)	TAD56_chr1	none	sex_indep_static (n=64,584)	not_bound	none	0	0	0	0	WE_353	WE	weak_enhancer	enhancer	chr1	54983229	54983231	-	ankrd44	TAD56_chr1	12643	0.597972	0.442082	0.771618	-1.29598	0.134425	None	none	none	none	none	none	none	none	213826_E11	E11	221039_E11	E11	1	NA	48.639	54	-0.15	118.734	19.225
747	chr1	54982696	54983540	845	sex-indep (robust)	TAD56_chr1	STAT5_sDHS	sex_indep_static (n=64,584)	not_bound	none	0	0	0	0	WP_48	WP	weak_promoter	promoter	chr1	54983229	54983231	-	ankrd44	TAD56_chr1	0	0.597972	0.442082	0.771618	-1.29598	0.134425	None	none	none	dDHS_open	static	static	static	static	213833_E8	E8	221043_E7	E7	0	NA	313.8	418	-0.41	658.434	203.785
748	chr1	55040221	55040775	555	sex-indep (robust)	TAD56_chr1	STAT5_hi_dDHS	sex_indep_dynamic (n=1532)	STAT5_bound	common	538	278	408	2	WE_354	WE	weak_enhancer	enhancer	chr1	54983229	54983231	-	ankrd44	TAD56_chr1	56991	0.597972	0.442082	0.771618	-1.29598	0.134425	None	none	none	static	static	dDHS_open	dDHS_open	dDHS_open	213848_E11	E11	221053_E11	E11	1	111	444.027	190	1.22	194.292	346.05
749	chr1	55083499	55084645	1147	sex-indep (robust)	TAD57_chr1	STAT5_sDHS	sex_indep_static (n=64,584)	not_bound	none	0	0	0	1	Prom_101	Prom	promoter	promoter	chr1	55084320	55084322	-	sf3b1	TAD57_chr1	0	10.3262	9.86677	0.992135	-1.00793	1	sex_indep	none	none	static	dDHS_open	static	static	static	213855_E7	E7	221060_E7	E7	1	NA	1799.64	1977	-0.14	1905.14	1211.17
750	chr1	55085806	55086008	203	sex-indep (robust)	TAD57_chr1	none	sex_indep_static (n=64,584)	not_bound	none	0	0	0	0	WE_355	WE	weak_enhancer	enhancer	chr1	55084320	55084322	-	sf3b1	TAD57_chr1	1485	10.3262	9.86677	0.992135	-1.00793	1	sex_indep	none	none	none	none	none	none	none	213858_E10	E10	221062_E10	E10	1	NA	62.76	74	-0.24	124.131	80.745
751	chr1	55108941	55110385	1445	sex-indep (robust)	TAD57_chr1	STAT5_sDHS	sex_indep_static (n=64,584)	STAT5_bound	common	269	154	211.5	1	Prom_102	Prom	promoter	promoter	chr1	55109613	55109615	+	coq10b	TAD57_chr1	0	5.15579	6.63328	1.32822	1.32822	0.0714476	None	none	none	static	dDHS_open	static	static	static	213867_E7	E7	221069_E7	E7	1	NA	4283.37	4205	0.03	7922.8	4044.94
752	chr1	55110535	55110714	180	sex-indep (standard)	TAD57_chr1	none	sex_indep_static (n=64,584)	STAT5_bound	common	269	154	211.5	0	WP_49	WP	weak_promoter	promoter	chr1	55109613	55109615	+	coq10b	TAD57_chr1	921	5.15579	6.63328	1.32822	1.32822	0.0714476	None	none	none	none	static	none	none	none	213867_E7	E7	221070_E8	E8	0	NA	78.45	87	-0.15	151.116	180.715
753	chr1	55136533	55136946	414	Male (standard)	TAD57_chr1	STAT5_hi_dDHS	male_bias_dynamic (n=834)	STAT5_bound	common	625	836	730.5	4	WE_356	WE	weak_enhancer	enhancer	chr1	55144774	55144776	-	hspd1	TAD57_chr1	7829	112.975	105.623	0.97001	-1.03092	1	sex_indep	none	none	static	static	dDHS_open	dDHS_open	dDHS_open	213885_E6	E6	221080_E6	E6	1	111	710.757	138	2.36	291.438	384.5
755	chr1	55187691	55188774	1084	sex-indep (robust)	TAD57_chr1	STAT5_sDHS	sex_indep_static (n=64,584)	not_bound	none	0	0	0	0	Prom_103	Prom	promoter	promoter	chr1	55188088	55188090	+	mob4	TAD57_chr1	0	5.2035	5.05092	1.01052	1.01052	1	sex_indep	none	none	dDHS_open	dDHS_open	static	static	dDHS_close	213912_E7	E7	221105_E7	E7	1	NA	2146.39	2340	-0.12	2595.96	1622.59
756	chr1	55202522	55202689	168	sex-indep (standard)	TAD57_chr1	STAT5_sDHS	sex_indep_static (n=64,584)	not_bound	none	0	0	0	0	WE_357	WE	weak_enhancer	enhancer	chr1	55188088	55188090	+	mob4	TAD57_chr1	14433	5.2035	5.05092	1.01052	1.01052	1	sex_indep	none	none	static	static	none	none	none	213921_E11	E11	221111_E13	E13	0	NA	75.312	77	-0.03	129.528	115.35
757	chr1	55227831	55229045	1215	sex-indep (robust)	TAD57_chr1	STAT5_sDHS	sex_indep_static (n=64,584)	not_bound	none	0	0	0	1	Insul_73	Insul	insulator	insulator	chr1	55188088	55188090	+	mob4	TAD57_chr1	39742	5.2035	5.05092	1.01052	1.01052	1	sex_indep	none	none	dDHS_close	static	static	static	static	213932_E6	E6	221118_E6	E6	1	NA	2692.4	2028	0.41	1872.76	2064.76
758	chr1	55230206	55231364	1159	sex-indep (robust)	TAD57_chr1	STAT5_sDHS	sex_indep_static (n=64,584)	STAT5_bound	common	160	77	118.5	3	Enh_160	Enh	enhancer	enhancer	chr1	55188088	55188090	+	mob4	TAD57_chr1	42117	5.2035	5.05092	1.01052	1.01052	1	sex_indep	none	none	static	static	static	static	static	213936_E6	E6	221122_E6	E6	1	NA	2766.15	2869	-0.05	2682.31	2199.34
759	chr1	55293784	55294496	713	sex-indep (robust)	TAD58_chr1	STAT5_sDHS	sex_indep_static (n=64,584)	not_bound	none	0	0	0	1	Prom_104	Prom	promoter	promoter	chr1	55294020	55294022	+	mars2	TAD58_chr1	0	0.487049	0.424186	0.887053	-1.12733	1	None	none	none	static	static	static	static	static	213958_E7	E7	221141_E7	E7	1	NA	637.014	756	-0.25	922.887	449.865
760	chr1	55420204	55420761	558	sex-indep (standard)	TAD58_chr1	STAT5_sDHS	sex_indep_static (n=64,584)	not_bound	none	0	0	0	0	Insul_74	Insul	insulator	insulator	chr1	55420311	55420313	-	boll	TAD58_chr1	0	0.00643034	0	0.276723	-3.61372	1	None	none	none	static	none	none	none	none	213967_E12	E12	221155_E12	E12	1	NA	189.849	217	-0.19	188.895	107.66
761	chr1	55440123	55440230	108	sex-indep (standard)	TAD58_chr1	none	sex_indep_static (n=64,584)	not_bound	none	0	0	0	0	Insul_75	Insul	insulator	insulator	chr1	55420311	55420313	-	boll	TAD58_chr1	19811	0.00643034	0	0.276723	-3.61372	1	None	none	none	none	none	none	none	none	213971_E2	E2	221157_E2	E2	1	NA	28.242	22	0.36	75.558	19.225
762	chr1	55462532	55463062	531	sex-indep (robust)	TAD59_chr1	STAT5_sDHS	sex_indep_static (n=64,584)	not_bound	none	0	0	0	0	Insul_76	Insul	insulator	insulator	chr1	55462789	55462791	+	plcl1	TAD59_chr1	0	0.102219	0.0506237	0.505153	-1.9796	0.0425841	None	none	none	static	none	static	static	static	213972_E12	E12	221159_E12	E12	1	NA	236.919	233	0.02	377.79	176.87
763	chr1	55763522	55763646	125	sex-indep (standard)	TAD59_chr1	STAT5_sDHS	sex_indep_static (n=64,584)	not_bound	none	0	0	0	0	WE_358	WE	weak_enhancer	enhancer	chr1	55462789	55462791	+	plcl1	TAD59_chr1	300732	0.102219	0.0506237	0.505153	-1.9796	0.0425841	None	none	none	static	static	static	none	static	213993_E6	E6	221184_E9	E9	0	NA	61.191	79	-0.37	178.101	34.605
764	chr1	55763876	55764255	380	sex-indep (robust)	TAD59_chr1	STAT5_sDHS	sex_indep_static (n=64,584)	not_bound	none	0	0	0	0	WE_359	WE	weak_enhancer	enhancer	chr1	55462789	55462791	+	plcl1	TAD59_chr1	301086	0.102219	0.0506237	0.505153	-1.9796	0.0425841	None	none	none	static	static	static	dDHS_close	static	213995_E6	E6	221186_E5	E5	0	NA	735.861	836	-0.18	890.505	795.915
765	chr1	55793231	55793425	195	sex-indep (standard)	TAD59_chr1	STAT5_sDHS	sex_indep_static (n=64,584)	not_bound	none	0	0	0	0	Insul_77	Insul	insulator	insulator	chr1	55462789	55462791	+	plcl1	TAD59_chr1	330441	0.102219	0.0506237	0.505153	-1.9796	0.0425841	None	none	none	static	none	none	none	none	214005_E12	E12	221191_E12	E12	1	NA	103.554	98	0.08	64.764	65.365
766	chr1	55864029	55864288	260	sex-indep (standard)	TAD59_chr1	none	sex_indep_static (n=64,584)	not_bound	none	0	0	0	0	WE_360	WE	weak_enhancer	enhancer	chr1	55462789	55462791	+	plcl1	TAD59_chr1	401239	0.102219	0.0506237	0.505153	-1.9796	0.0425841	None	none	none	none	none	none	none	none	214010_E10	E10	221200_E12	E12	0	NA	51.777	42	0.3	80.955	76.9
767	chr1	56351340	56351510	171	sex-indep (standard)	TAD60_chr1	none	sex_indep_static (n=64,584)	not_bound	none	0	0	0	2	WE_361	WE	weak_enhancer	enhancer	chr1	56075821	56075823	+	1700003i22rik	TAD60_chr1	275518	0	0	1	1	1	None	none	none	none	none	none	none	none	214021_E2	E2	221230_E2	E2	1	NA	58.053	35	0.73	37.779	76.9
768	chr1	56596578	56597327	750	sex-indep (robust)	TAD60_chr1	STAT5_sDHS	sex_indep_static (n=64,584)	STAT5_bound	male_enriched	142	18	80	0	Enh_161	Enh	enhancer	enhancer	chr1	56694293	56694295	-	hsfy2	TAD60_chr1	96967	0	0	1	1	1	None	none	none	dDHS_close	static	static	static	static	214026_E6	E6	221235_E6	E6	1	NA	1744.73	1644	0.09	901.299	1022.77
769	chr1	56838930	56839333	404	sex-indep (standard)	TAD60_chr1	none	sex_indep_static (n=64,584)	not_bound	none	0	0	0	0	WE_362	WE	weak_enhancer	enhancer	chr1	56694293	56694295	-	hsfy2	TAD60_chr1	144636	0	0	1	1	1	None	none	none	none	none	none	none	none	214041_E5	E5	221249_E12	E12	0	NA	6.276	4	0.65	16.191	0
770	chr1	57026169	57026709	541	sex-indep (robust)	TAD60_chr1	none	sex_indep_static (n=64,584)	not_bound	none	0	0	0	2	WE_363	WE	weak_enhancer	enhancer	chr1	57028176	57028178	-	satb2	TAD60_chr1	1468	0.0735069	0.0720587	1.02424	1.02424	1	None	none	none	none	none	none	none	none	214060_E12	E12	221273_E12	E12	1	NA	304.386	272	0.16	350.805	365.275
772	chr1	57028892	57030834	1943	sex-indep (robust)	TAD60_chr1	STAT5_sDHS	sex_indep_static (n=64,584)	not_bound	none	0	0	0	1	Prom_105	Prom	promoter	promoter	chr1	57028313	57028315	+	nc_inter_c1_215	TAD60_chr1	578	0.0108162	0.0168456	1.40532	1.40532	1	None	none	none	dDHS_open	dDHS_open	static	static	static	214061_E7	E7	221275_E7	E7	1	NA	3177.22	3614	-0.19	3405.51	2495.41
773	chr1	57031117	57031481	365	sex-indep (robust)	TAD60_chr1	STAT5_sDHS	sex_indep_static (n=64,584)	not_bound	none	0	0	0	1	WE_364	WE	weak_enhancer	enhancer	chr1	57028313	57028315	+	nc_inter_c1_215	TAD60_chr1	2803	0.0108162	0.0168456	1.40532	1.40532	1	None	none	none	dDHS_close	static	static	static	static	214063_E12	E12	221276_E12	E12	1	NA	778.224	755	0.04	329.217	918.955
774	chr1	57326514	57326827	314	sex-indep (standard)	TAD60_chr1	STAT5_sDHS	sex_indep_static (n=64,584)	not_bound	none	0	0	0	0	Insul_78	Insul	insulator	insulator	chr1	57271838	57271840	-	bc055402	TAD60_chr1	54675	0	0	1	1	1	None	none	none	static	none	none	none	none	214086_E11	E11	221300_E12	E12	0	NA	89.433	112	-0.32	113.337	80.745
775	chr1	57396280	57396544	265	sex-indep (robust)	TAD60_chr1	STAT5_sDHS	sex_indep_static (n=64,584)	not_bound	none	0	0	0	2	Insul_79	Insul	insulator	insulator	chr1	57434386	57434388	-	4930558j18rik	TAD60_chr1	37843	0.00850134	0.00430565	0.592408	-1.68803	1	None	none	none	static	none	dDHS_open	dDHS_open	none	214097_E6	E6	221311_E11	E11	0	NA	175.728	170	0.05	221.277	142.265
776	chr1	57398092	57398377	286	sex-indep (robust)	TAD60_chr1	STAT5_sDHS	sex_indep_static (n=64,584)	not_bound	none	0	0	0	1	WE_365	WE	weak_enhancer	enhancer	chr1	57434386	57434388	-	4930558j18rik	TAD60_chr1	36010	0.00850134	0.00430565	0.592408	-1.68803	1	None	none	none	static	static	dDHS_open	static	static	214104_E6	E6	221313_E11	E11	0	NA	309.093	306	0.01	291.438	303.755
777	chr1	57425294	57425549	256	sex-indep (robust)	TAD60_chr1	STAT5_sDHS	sex_indep_static (n=64,584)	not_bound	none	0	0	0	0	WE_366	WE	weak_enhancer	enhancer	chr1	57434386	57434388	-	4930558j18rik	TAD60_chr1	8838	0.00850134	0.00430565	0.592408	-1.68803	1	None	none	none	static	dDHS_open	static	static	static	214111_E5	E5	221318_E6	E6	0	NA	127.089	155	-0.29	307.629	180.715
778	chr1	57429739	57430038	300	sex-indep (robust)	TAD60_chr1	STAT5_sDHS	sex_indep_static (n=64,584)	not_bound	none	0	0	0	0	WE_367	WE	weak_enhancer	enhancer	chr1	57434386	57434388	-	4930558j18rik	TAD60_chr1	4349	0.00850134	0.00430565	0.592408	-1.68803	1	None	none	none	static	none	none	none	none	214114_E13	E13	221324_E6	E6	0	NA	89.433	163	-0.87	59.367	92.28
779	chr1	57434191	57435070	880	sex-indep (robust)	TAD60_chr1	STAT5_sDHS	sex_indep_static (n=64,584)	not_bound	none	0	0	0	0	Prom_106	Prom	promoter	promoter	chr1	57434386	57434388	-	4930558j18rik	TAD60_chr1	0	0.00850134	0.00430565	0.592408	-1.68803	1	None	none	none	static	static	static	static	static	214116_E7	E7	221329_E7	E7	1	NA	486.39	552	-0.18	545.097	384.5
780	chr1	57447913	57448625	713	sex-indep (robust)	TAD60_chr1	STAT5_sDHS	sex_indep_static (n=64,584)	not_bound	none	0	0	0	1	Enh_162	Enh	enhancer	enhancer	chr1	57434463	57434465	+	1700066m21rik	TAD60_chr1	13449	4.34048	5.78634	1.38604	1.38604	0.001596	None	none	none	static	static	static	static	static	214133_E7	E7	221349_E6	E6	0	NA	894.33	1134	-0.34	582.876	984.32
781	chr1	57449325	57449916	592	sex-indep (robust)	TAD60_chr1	STAT5_sDHS	sex_indep_static (n=64,584)	not_bound	none	0	0	0	0	Enh_163	Enh	enhancer	enhancer	chr1	57434463	57434465	+	1700066m21rik	TAD60_chr1	14861	4.34048	5.78634	1.38604	1.38604	0.001596	None	none	none	static	static	static	static	static	214138_E6	E6	221354_E9	E9	0	NA	412.647	551	-0.42	420.966	769
782	chr1	57462902	57464170	1269	sex-indep (robust)	TAD61_chr1	STAT5_sDHS	sex_indep_static (n=64,584)	not_bound	none	0	0	0	1	Prom_107	Prom	promoter	promoter	chr1	57463391	57463393	+	9430016h08rik	TAD61_chr1	0	4.93529	5.33087	1.12059	1.12059	0.757569	sex_indep	none	none	static	dDHS_open	static	static	static	214147_E7	E7	221362_E7	E7	1	NA	1865.54	2190	-0.23	1926.73	995.855
783	chr1	57486706	57486886	181	sex-indep (standard)	TAD61_chr1	none	sex_indep_static (n=64,584)	not_bound	none	0	0	0	0	Insul_80	Insul	insulator	insulator	chr1	57463516	57463518	-	tyw5	TAD61_chr1	23189	2.27993	2.38747	1.10488	1.10488	1	sex_indep	none	none	none	none	none	none	none	214157_E1	E1	221369_E1	E1	1	NA	47.07	35	0.43	86.352	73.055
784	chr1	57493003	57493611	609	sex-indep (robust)	TAD61_chr1	STAT5_sDHS	sex_indep_static (n=64,584)	not_bound	none	0	0	0	1	WE_368	WE	weak_enhancer	enhancer	chr1	57463516	57463518	-	tyw5	TAD61_chr1	29486	2.27993	2.38747	1.10488	1.10488	1	sex_indep	none	none	static	static	static	static	static	214160_E5	E5	221371_E5	E5	1	NA	403.233	399	0.02	620.655	730.55
785	chr1	57546966	57547278	313	sex-indep (robust)	TAD61_chr1	STAT5_sDHS	sex_indep_static (n=64,584)	not_bound	none	0	0	0	0	WE_369	WE	weak_enhancer	enhancer	chr1	57463516	57463518	-	tyw5	TAD61_chr1	83449	2.27993	2.38747	1.10488	1.10488	1	sex_indep	none	none	none	static	none	none	static	214167_E13	E13	221378_E5	E5	0	NA	134.934	134	0.01	188.895	161.49
786	chr1	57799178	57799427	250	sex-indep (robust)	TAD61_chr1	STAT5_sDHS	sex_indep_static (n=64,584)	not_bound	none	0	0	0	0	WE_370	WE	weak_enhancer	enhancer	chr1	57831704	57831706	+	spats2l	TAD61_chr1	32278	0.266862	0.216486	0.837456	-1.19409	0.948591	None	none	none	none	static	none	none	none	214193_E6	E6	221407_E6	E6	1	NA	65.898	104	-0.66	70.161	146.11
787	chr1	57831491	57832131	641	sex-indep (standard)	TAD61_chr1	STAT5_sDHS	sex_indep_static (n=64,584)	not_bound	none	0	0	0	0	WP_50	WP	weak_promoter	promoter	chr1	57831704	57831706	+	spats2l	TAD61_chr1	0	0.266862	0.216486	0.837456	-1.19409	0.948591	None	none	none	none	none	none	none	none	214200_E7	E7	221412_E12	E12	0	NA	141.21	163	-0.21	232.071	107.66
788	chr1	57906853	57907063	211	sex-indep (robust)	TAD61_chr1	STAT5_sDHS	sex_indep_static (n=64,584)	not_bound	none	0	0	0	0	WE_371	WE	weak_enhancer	enhancer	chr1	57902414	57902416	+	spats2l	TAD61_chr1	4438	0.266862	0.216486	0.837456	-1.19409	0.948591	None	none	none	static	none	none	none	none	214212_E6	E6	221424_E6	E6	1	NA	109.83	65	0.76	102.543	111.505
789	chr1	57947148	57947614	467	sex-indep (standard)	TAD61_chr1	STAT5_sDHS	sex_indep_static (n=64,584)	not_bound	none	0	0	0	2	WE_372	WE	weak_enhancer	enhancer	chr1	57902414	57902416	+	spats2l	TAD61_chr1	44733	0.266862	0.216486	0.837456	-1.19409	0.948591	None	none	none	static	none	static	static	static	214222_E10	E10	221436_E5	E5	0	NA	207.108	161	0.36	237.468	180.715
790	chr1	58026752	58027169	418	sex-indep (robust)	TAD61_chr1	STAT5_sDHS	sex_indep_static (n=64,584)	not_bound	none	0	0	0	2	WP_51	WP	weak_promoter	promoter	chr1	58026926	58026928	-	kctd18	TAD61_chr1	0	1.05417	0.883372	0.868411	-1.15153	0.762261	None	none	none	static	static	static	static	static	214231_E7	E7	221447_E7	E7	1	NA	381.267	411	-0.11	361.599	199.94
791	chr1	58052546	58053159	614	sex-indep (robust)	TAD62_chr1	STAT5_sDHS	sex_indep_static (n=64,584)	not_bound	none	0	0	0	2	WP_52	WP	weak_promoter	promoter	chr1	58052817	58052819	+	sgol2a	TAD62_chr1	0	0.0421952	0.0580348	1.47976	1.47976	0.819447	None	none	none	static	static	static	static	static	214237_E7	E7	221455_E7	E7	1	NA	445.596	518	-0.22	469.539	315.29
793	chr1	58088614	58088721	108	sex-indep (standard)	TAD62_chr1	none	sex_indep_static (n=64,584)	not_bound	none	0	0	0	0	WP_53	WP	weak_promoter	promoter	chr1	58086812	58086814	+	aox1	TAD62_chr1	1801	6.35705	15.7344	2.56573	2.56573	3.89543e-19	Male	no_response	none	none	none	none	none	none	214250_E6	E6	221469_E11	E11	0	NA	65.898	71	-0.11	102.543	46.14
794	chr1	58127850	58129112	1263	Male (robust)	TAD62_chr1	STAT5_hi_dDHS	male_bias_dynamic (n=834)	STAT5_bound	male_enriched	1067	140	603.5	8	Enh_164	Enh	enhancer	enhancer	chr1	58169979	58169981	+	aox3	TAD62_chr1	40868	33.0026	169.161	5.31553	5.31553	2.84295e-97	Male	class_I	IA	dDHS_close	static	dDHS_open	dDHS_open	static	214264_E6	E6	221481_E6	E6	1	1110	3731.08	1927	0.95	895.902	669.03
795	chr1	58134236	58134474	239	sex-indep (standard)	TAD62_chr1	STAT5_sDHS	sex_indep_static (n=64,584)	not_bound	none	0	0	0	0	WE_373	WE	weak_enhancer	enhancer	chr1	58169979	58169981	+	aox3	TAD62_chr1	35506	33.0026	169.161	5.31553	5.31553	2.84295e-97	Male	class_I	IA	none	none	none	none	none	214267_E9	E9	221484_E9	E9	1	NA	94.14	102	-0.12	70.161	80.745
796	chr1	58134675	58135709	1035	Male (robust)	TAD62_chr1	STAT5_sDHS	male_bias_static (n=1895)	STAT5_bound	male_enriched	600	68	334	1	Enh_165	Enh	enhancer	enhancer	chr1	58169979	58169981	+	aox3	TAD62_chr1	34271	33.0026	169.161	5.31553	5.31553	2.84295e-97	Male	class_I	IA	dDHS_close	static	static	static	static	214268_E6	E6	221487_E6	E6	1	NA	1598.81	1697	-0.09	760.977	880.505
797	chr1	58138066	58138430	365	sex-indep (robust)	TAD62_chr1	STAT5_sDHS	sex_indep_static (n=64,584)	STAT5_bound	male_enriched	122	20	71	1	Enh_166	Enh	enhancer	enhancer	chr1	58169979	58169981	+	aox3	TAD62_chr1	31550	33.0026	169.161	5.31553	5.31553	2.84295e-97	Male	class_I	IA	static	none	none	none	none	214270_E6	E6	221490_E11	E11	0	NA	251.04	248	0.02	172.704	238.39
798	chr1	58149359	58149716	358	sex-indep (robust)	TAD62_chr1	STAT5_sDHS	sex_indep_static (n=64,584)	STAT5_bound	male_enriched	191	21	106	0	Enh_167	Enh	enhancer	enhancer	chr1	58169979	58169981	+	aox3	TAD62_chr1	20264	33.0026	169.161	5.31553	5.31553	2.84295e-97	Male	class_I	IA	dDHS_close	static	none	none	static	214286_E6	E6	221499_E6	E6	1	NA	472.269	524	-0.15	113.337	399.88
799	chr1	58154239	58154580	342	sex-indep (robust)	TAD62_chr1	STAT5_sDHS	sex_indep_static (n=64,584)	not_bound	none	0	0	0	0	WE_374	WE	weak_enhancer	enhancer	chr1	58169979	58169981	+	aox3	TAD62_chr1	15400	33.0026	169.161	5.31553	5.31553	2.84295e-97	Male	class_I	IA	static	dDHS_close	none	none	none	214290_E6	E6	221506_E6	E6	1	NA	276.144	465	-0.75	118.734	599.82
800	chr1	58158302	58158945	644	sex-indep (robust)	TAD62_chr1	STAT5_sDHS	sex_indep_static (n=64,584)	STAT5_bound	male_enriched	837	266	551.5	1	WE_375	WE	weak_enhancer	enhancer	chr1	58169979	58169981	+	aox3	TAD62_chr1	11035	33.0026	169.161	5.31553	5.31553	2.84295e-97	Male	class_I	IA	static	static	static	static	static	214298_E6	E6	221514_E6	E6	1	NA	3185.07	3013	0.08	2250.55	4044.94
801	chr1	58169758	58170560	803	sex-indep (robust)	TAD62_chr1	STAT5_sDHS	sex_indep_static (n=64,584)	not_bound	none	0	0	0	0	Prom_108	Prom	promoter	promoter	chr1	58169979	58169981	+	aox3	TAD62_chr1	0	33.0026	169.161	5.31553	5.31553	2.84295e-97	Male	class_I	IA	static	static	static	static	static	214308_E7	E7	221522_E8	E8	0	NA	1043.38	1386	-0.41	626.052	853.59
802	chr1	58170836	58171233	398	sex-indep (robust)	TAD62_chr1	STAT5_sDHS	sex_indep_static (n=64,584)	STAT5_bound	common	193	90	141.5	0	Prom_109	Prom	promoter	promoter	chr1	58169979	58169981	+	aox3	TAD62_chr1	856	33.0026	169.161	5.31553	5.31553	2.84295e-97	Male	class_I	IA	static	static	none	none	none	214308_E7	E7	221523_E7	E7	1	NA	401.664	461	-0.2	226.674	499.85
803	chr1	58171725	58172319	595	Male (standard)	TAD62_chr1	STAT5_sDHS	male_bias_static (n=1895)	STAT5_bound	common	304	303	303.5	3	Prom_110	Prom	promoter	promoter	chr1	58169979	58169981	+	aox3	TAD62_chr1	1745	33.0026	169.161	5.31553	5.31553	2.84295e-97	Male	class_I	IA	static	none	none	none	none	214310_E7	E7	221524_E8	E8	0	NA	629.169	518	0.28	296.835	369.12
804	chr1	58174849	58175505	657	sex-indep (robust)	TAD62_chr1	STAT5_sDHS	sex_indep_static (n=64,584)	not_bound	none	0	0	0	0	Enh_168	Enh	enhancer	enhancer	chr1	58169979	58169981	+	aox3	TAD62_chr1	4869	33.0026	169.161	5.31553	5.31553	2.84295e-97	Male	class_I	IA	static	none	none	none	none	214317_E6	E6	221531_E6	E6	1	NA	390.681	559	-0.52	334.614	372.965
805	chr1	58194821	58195029	209	sex-indep (robust)	TAD62_chr1	none	sex_indep_static (n=64,584)	not_bound	none	0	0	0	0	Insul_81	Insul	insulator	insulator	chr1	58169979	58169981	+	aox3	TAD62_chr1	24841	33.0026	169.161	5.31553	5.31553	2.84295e-97	Male	class_I	IA	none	none	none	none	none	214329_E5	E5	221538_E11	E11	0	NA	69.036	92	-0.41	107.94	42.295
806	chr1	58200931	58202136	1206	sex-indep (robust)	TAD62_chr1	STAT5_sDHS	sex_indep_static (n=64,584)	STAT5_bound	common	421	240	330.5	4	WE_376	WE	weak_enhancer	enhancer	chr1	58169979	58169981	+	aox3	TAD62_chr1	30951	33.0026	169.161	5.31553	5.31553	2.84295e-97	Male	class_I	IA	static	dDHS_close	static	static	static	214340_E5	E5	221544_E6	E6	0	NA	3003.07	3048	-0.02	3006.13	4960.05
807	chr1	58202740	58203039	300	sex-indep (robust)	TAD62_chr1	none	sex_indep_static (n=64,584)	not_bound	none	0	0	0	0	WE_377	WE	weak_enhancer	enhancer	chr1	58169979	58169981	+	aox3	TAD62_chr1	32760	33.0026	169.161	5.31553	5.31553	2.84295e-97	Male	class_I	IA	none	none	none	none	none	214345_E6	E6	221547_E8	E8	0	NA	111.399	198	-0.83	97.146	84.59
808	chr1	58203246	58203737	492	sex-indep (standard)	TAD62_chr1	none	sex_indep_static (n=64,584)	not_bound	none	0	0	0	0	WE_378	WE	weak_enhancer	enhancer	chr1	58169979	58169981	+	aox3	TAD62_chr1	33266	33.0026	169.161	5.31553	5.31553	2.84295e-97	Male	class_I	IA	none	none	none	none	none	214346_E5	E5	221549_E14	E14	0	NA	147.486	217	-0.56	113.337	146.11
809	chr1	58204580	58204829	250	sex-indep (robust)	TAD62_chr1	none	sex_indep_static (n=64,584)	not_bound	none	0	0	0	0	WE_379	WE	weak_enhancer	enhancer	chr1	58169979	58169981	+	aox3	TAD62_chr1	34600	33.0026	169.161	5.31553	5.31553	2.84295e-97	Male	class_I	IA	none	none	none	none	none	214346_E5	E5	221549_E14	E14	0	NA	64.329	98	-0.61	102.543	46.14
810	chr1	58205138	58205390	253	Male (standard)	TAD62_chr1	none	male_bias_static (n=1895)	not_bound	none	0	0	0	0	WE_380	WE	weak_enhancer	enhancer	chr1	58169979	58169981	+	aox3	TAD62_chr1	35158	33.0026	169.161	5.31553	5.31553	2.84295e-97	Male	class_I	IA	none	none	none	none	none	214346_E5	E5	221549_E14	E14	0	NA	78.45	102	-0.38	70.161	61.52
811	chr1	58216581	58216701	121	Male (less stringent)	TAD62_chr1	none	male_bias_static (n=1895)	not_bound	none	0	0	0	0	WE_381	WE	weak_enhancer	enhancer	chr1	58169979	58169981	+	aox3	TAD62_chr1	46601	33.0026	169.161	5.31553	5.31553	2.84295e-97	Male	class_I	IA	none	none	none	none	none	214350_E5	E5	221551_E14	E14	0	NA	34.518	41	-0.25	43.176	42.295
812	chr1	58241169	58241389	221	Male (less stringent)	TAD62_chr1	none	male_bias_static (n=1895)	not_bound	none	0	0	0	0	WE_382	WE	weak_enhancer	enhancer	chr1	58267240	58267242	+	aox4	TAD62_chr1	25852	0	0.00177699	3.69855	3.69855	1	None	none	none	none	none	none	none	none	214351_E14	E14	221555_E14	E14	1	NA	61.191	97	-0.66	59.367	34.605
813	chr1	58251322	58251685	364	Male (standard)	TAD62_chr1	none	male_bias_static (n=1895)	not_bound	none	0	0	0	0	WE_383	WE	weak_enhancer	enhancer	chr1	58267240	58267242	+	aox4	TAD62_chr1	15556	0	0.00177699	3.69855	3.69855	1	None	none	none	none	none	none	none	none	214351_E14	E14	221556_E13	E13	0	NA	65.898	132	-1	91.749	57.675
814	chr1	58254565	58254761	197	Male (standard)	TAD62_chr1	none	male_bias_static (n=1895)	not_bound	none	0	0	0	0	Insul_82	Insul	insulator	insulator	chr1	58267240	58267242	+	aox4	TAD62_chr1	12480	0	0.00177699	3.69855	3.69855	1	None	none	none	none	none	none	none	none	214353_E5	E5	221556_E13	E13	0	NA	43.932	90	-1.03	37.779	19.225
815	chr1	58353202	58353429	228	sex-indep (standard)	TAD62_chr1	STAT5_sDHS	sex_indep_static (n=64,584)	not_bound	none	0	0	0	0	Insul_83	Insul	insulator	insulator	chr1	58335169	58335171	+	aox2	TAD62_chr1	18032	0.0175195	0	0.0443635	-22.5411	0.117074	None	none	none	static	none	none	none	none	214368_E12	E12	221578_E12	E12	1	NA	34.518	69	-1	86.352	46.14
816	chr1	58398519	58398761	243	sex-indep (standard)	TAD63_chr1	STAT5_sDHS	sex_indep_static (n=64,584)	not_bound	none	0	0	0	0	WE_384	WE	weak_enhancer	enhancer	chr1	58449979	58449981	+	bzw1	TAD63_chr1	51219	28.9452	27.6817	0.992969	-1.00708	1	sex_indep	none	none	static	static	none	none	none	214376_E6	E6	221592_E9	E9	0	NA	91.002	110	-0.27	124.131	130.73
817	chr1	58410298	58410860	563	sex-indep (robust)	TAD63_chr1	STAT5_sDHS	sex_indep_static (n=64,584)	not_bound	none	0	0	0	1	WE_385	WE	weak_enhancer	enhancer	chr1	58449979	58449981	+	bzw1	TAD63_chr1	39120	28.9452	27.6817	0.992969	-1.00708	1	sex_indep	none	none	static	static	static	static	static	214382_E6	E6	221599_E6	E6	1	NA	1482.7	1389	0.09	1192.74	1449.57
818	chr1	58439469	58439858	390	sex-indep (robust)	TAD63_chr1	STAT5_sDHS	sex_indep_static (n=64,584)	not_bound	none	0	0	0	0	WE_386	WE	weak_enhancer	enhancer	chr1	58449979	58449981	+	bzw1	TAD63_chr1	10122	28.9452	27.6817	0.992969	-1.00708	1	sex_indep	none	none	static	none	static	static	static	214391_E6	E6	221604_E11	E11	0	NA	131.796	127	0.05	248.262	96.125
819	chr1	58448793	58448901	109	sex-indep (standard)	TAD63_chr1	STAT5_sDHS	sex_indep_static (n=64,584)	not_bound	none	0	0	0	0	Prom_111	Prom	promoter	promoter	chr1	58449979	58449981	+	bzw1	TAD63_chr1	1079	28.9452	27.6817	0.992969	-1.00708	1	sex_indep	none	none	static	none	none	none	none	214398_E8	E8	221608_E8	E8	1	NA	61.191	70	-0.19	91.749	57.675
820	chr1	58449436	58450393	958	sex-indep (robust)	TAD63_chr1	STAT5_sDHS	sex_indep_static (n=64,584)	not_bound	none	0	0	0	0	Prom_112	Prom	promoter	promoter	chr1	58449979	58449981	+	bzw1	TAD63_chr1	0	28.9452	27.6817	0.992969	-1.00708	1	sex_indep	none	none	static	dDHS_open	static	static	static	214399_E7	E7	221609_E7	E7	1	NA	1964.39	1502	0.39	2250.55	972.785
821	chr1	58450457	58450726	270	sex-indep (standard)	TAD63_chr1	none	sex_indep_static (n=64,584)	not_bound	none	0	0	0	0	Prom_113	Prom	promoter	promoter	chr1	58449979	58449981	+	bzw1	TAD63_chr1	477	28.9452	27.6817	0.992969	-1.00708	1	sex_indep	none	none	none	none	none	none	none	214399_E7	E7	221609_E7	E7	1	NA	91.002	114	-0.33	140.322	73.055
822	chr1	58458290	58458596	307	sex-indep (robust)	TAD63_chr1	STAT5_sDHS	sex_indep_static (n=64,584)	not_bound	none	0	0	0	0	WE_387	WE	weak_enhancer	enhancer	chr1	58449979	58449981	+	bzw1	TAD63_chr1	8310	28.9452	27.6817	0.992969	-1.00708	1	sex_indep	none	none	static	static	static	static	static	214407_E6	E6	221617_E6	E6	1	NA	150.624	206	-0.45	237.468	280.685
823	chr1	58479758	58480020	263	sex-indep (robust)	TAD63_chr1	STAT5_sDHS	sex_indep_static (n=64,584)	STAT5_bound	common	450	365	407.5	0	Prom_114	Prom	promoter	promoter	chr1	58480930	58480932	-	clk1	TAD63_chr1	911	13.2198	11.2034	0.880247	-1.13604	0.347431	sex_indep	none	none	static	static	static	static	static	214419_E7	E7	221629_E7	E7	1	NA	249.471	272	-0.12	286.041	342.205
824	chr1	58480310	58481217	908	sex-indep (robust)	TAD63_chr1	STAT5_sDHS	sex_indep_static (n=64,584)	STAT5_bound	common	450	365	407.5	2	Prom_115	Prom	promoter	promoter	chr1	58480930	58480932	-	clk1	TAD63_chr1	0	13.2198	11.2034	0.880247	-1.13604	0.347431	sex_indep	none	none	static	static	static	static	static	214421_E7	E7	221629_E7	E7	1	NA	1234.8	1147	0.11	1020.03	953.56
825	chr1	58481486	58481647	162	sex-indep (standard)	TAD63_chr1	none	sex_indep_static (n=64,584)	not_bound	none	0	0	0	0	Prom_116	Prom	promoter	promoter	chr1	58480930	58480932	-	clk1	TAD63_chr1	555	13.2198	11.2034	0.880247	-1.13604	0.347431	sex_indep	none	none	none	none	none	none	none	214422_E5	E5	221631_E11	E11	0	NA	12.552	18	-0.52	10.794	3.845
826	chr1	58501963	58502670	708	sex-indep (robust)	TAD63_chr1	STAT5_sDHS	sex_indep_static (n=64,584)	not_bound	none	0	0	0	2	Prom_117	Prom	promoter	promoter	chr1	58502328	58502330	-	ppil3	TAD63_chr1	0	2.6722	2.48779	0.971278	-1.02957	1	sex_indep	none	none	static	static	static	static	static	214428_E7	E7	221637_E7	E7	1	NA	721.74	788	-0.13	885.108	411.415
827	chr1	58532529	58532875	347	sex-indep (robust)	TAD63_chr1	STAT5_sDHS	sex_indep_static (n=64,584)	not_bound	none	0	0	0	2	WE_388	WE	weak_enhancer	enhancer	chr1	58558268	58558270	-	orc2	TAD63_chr1	25394	0.877057	0.964468	1.15195	1.15195	0.802444	None	none	none	none	static	none	none	static	214439_E6	E6	221648_E6	E6	1	NA	144.348	105	0.46	210.483	234.545
828	chr1	58561435	58562085	651	sex-indep (robust)	TAD63_chr1	STAT5_sDHS	sex_indep_static (n=64,584)	not_bound	none	0	0	0	0	Prom_118	Prom	promoter	promoter	chr1	58561951	58561953	-	orc2	TAD63_chr1	0	0.877057	0.964468	1.15195	1.15195	0.802444	None	none	none	static	static	static	static	static	214449_E7	E7	221660_E7	E7	1	NA	682.515	652	0.07	685.419	449.865
829	chr1	58642331	58642528	198	sex-indep (standard)	TAD63_chr1	none	sex_indep_static (n=64,584)	not_bound	none	0	0	0	0	Prom_119	Prom	promoter	promoter	chr1	58643175	58643177	-	fam126b	TAD63_chr1	648	1.76653	1.86553	1.09841	1.09841	0.73873	sex_indep	none	none	none	none	none	none	none	214467_E7	E7	221688_E7	E7	1	NA	97.278	115	-0.24	107.94	99.97
830	chr1	58642642	58643603	962	sex-indep (robust)	TAD63_chr1	STAT5_sDHS	sex_indep_static (n=64,584)	not_bound	none	0	0	0	0	Prom_120	Prom	promoter	promoter	chr1	58643175	58643177	-	fam126b	TAD63_chr1	0	1.76653	1.86553	1.09841	1.09841	0.73873	sex_indep	none	none	static	dDHS_open	static	static	static	214467_E7	E7	221688_E7	E7	1	NA	1922.03	2152	-0.16	2196.58	1522.62
831	chr1	58661705	58661910	206	sex-indep (standard)	TAD63_chr1	STAT5_sDHS	sex_indep_static (n=64,584)	STAT5_bound	common	215	112	163.5	2	WE_389	WE	weak_enhancer	enhancer	chr1	58643442	58643444	+	ndufb3	TAD63_chr1	18262	36.5059	35.5779	1.00963	1.00963	1	sex_indep	none	none	static	none	none	none	none	214479_E6	E6	221699_E9	E9	0	NA	244.764	133	0.88	91.749	165.335
832	chr1	58667041	58667837	797	sex-indep (robust)	TAD63_chr1	STAT5_hi_dDHS	sex_indep_dynamic (n=1532)	STAT5_bound	common	452	167	309.5	4	Enh_169	Enh	enhancer	enhancer	chr1	58643442	58643444	+	ndufb3	TAD63_chr1	23598	36.5059	35.5779	1.00963	1.00963	1	sex_indep	none	none	dDHS_close	dDHS_close	dDHS_open	dDHS_open	none	214486_E6	E6	221704_E6	E6	1	1110	1804.35	806	1.16	501.921	1084.29
833	chr1	58671347	58672313	967	sex-indep (robust)	TAD63_chr1	STAT5_sDHS	sex_indep_static (n=64,584)	STAT5_bound	common	275	199	237	0	Enh_170	Enh	enhancer	enhancer	chr1	58643442	58643444	+	ndufb3	TAD63_chr1	27904	36.5059	35.5779	1.00963	1.00963	1	sex_indep	none	none	static	static	static	static	static	214490_E6	E6	221709_E6	E6	1	NA	1178.32	1317	-0.16	1171.15	1464.94
834	chr1	58672502	58672848	347	sex-indep (standard)	TAD63_chr1	STAT5_sDHS	sex_indep_static (n=64,584)	not_bound	none	0	0	0	0	Enh_171	Enh	enhancer	enhancer	chr1	58643442	58643444	+	ndufb3	TAD63_chr1	29059	36.5059	35.5779	1.00963	1.00963	1	sex_indep	none	none	static	none	none	none	none	214490_E6	E6	221711_E6	E6	1	NA	219.66	246	-0.16	188.895	196.095
835	chr1	58709312	58709847	536	sex-indep (robust)	TAD63_chr1	STAT5_sDHS	sex_indep_static (n=64,584)	not_bound	none	0	0	0	2	Prom_121	Prom	promoter	promoter	chr1	58709484	58709486	+	gm20257	TAD63_chr1	0	1.01403	0.925405	0.961667	-1.03986	1	None	none	none	static	static	none	static	static	214503_E7	E7	221724_E7	E7	1	NA	345.18	356	-0.04	194.292	230.7
836	chr1	58767886	58768864	979	sex-indep (robust)	TAD63_chr1	STAT5_sDHS	sex_indep_static (n=64,584)	not_bound	none	0	0	0	0	Prom_122	Prom	promoter	promoter	chr1	58768334	58768336	+	cflar	TAD63_chr1	0	7.1947	6.45346	0.932111	-1.07283	0.958591	sex_indep	none	none	static	none	none	none	none	214514_E7	E7	221735_E7	E7	1	NA	806.466	934	-0.21	685.419	695.945
838	chr1	58773114	58773390	277	sex-indep (standard)	TAD63_chr1	none	sex_indep_static (n=64,584)	not_bound	none	0	0	0	0	Enh_172	Enh	enhancer	enhancer	chr1	58770129	58770131	+	cflar	TAD63_chr1	2984	7.1947	6.45346	0.932111	-1.07283	0.958591	sex_indep	none	none	none	none	none	none	none	214518_E7	E7	221738_E8	E8	0	NA	119.244	151	-0.34	161.91	149.955
839	chr1	58773504	58773660	157	sex-indep (robust)	TAD63_chr1	none	sex_indep_static (n=64,584)	not_bound	none	0	0	0	0	Enh_173	Enh	enhancer	enhancer	chr1	58770129	58770131	+	cflar	TAD63_chr1	3374	7.1947	6.45346	0.932111	-1.07283	0.958591	sex_indep	none	none	none	none	none	none	none	214519_E6	E6	221739_E9	E9	0	NA	141.21	144	-0.03	129.528	230.7
840	chr1	58773850	58774039	190	sex-indep (robust)	TAD63_chr1	none	sex_indep_static (n=64,584)	not_bound	none	0	0	0	0	Enh_174	Enh	enhancer	enhancer	chr1	58770129	58770131	+	cflar	TAD63_chr1	3720	7.1947	6.45346	0.932111	-1.07283	0.958591	sex_indep	none	none	none	none	none	none	none	214521_E6	E6	221740_E6	E6	1	NA	51.777	77	-0.57	64.764	57.675
841	chr1	58776065	58776212	148	sex-indep (standard)	TAD63_chr1	none	sex_indep_static (n=64,584)	not_bound	none	0	0	0	0	Enh_175	Enh	enhancer	enhancer	chr1	58770129	58770131	+	cflar	TAD63_chr1	5935	7.1947	6.45346	0.932111	-1.07283	0.958591	sex_indep	none	none	none	none	none	none	none	214524_E6	E6	221744_E9	E9	0	NA	39.225	55	-0.49	70.161	49.985
842	chr1	58777012	58777341	330	sex-indep (robust)	TAD63_chr1	none	sex_indep_static (n=64,584)	not_bound	none	0	0	0	2	WE_390	WE	weak_enhancer	enhancer	chr1	58770129	58770131	+	cflar	TAD63_chr1	6882	7.1947	6.45346	0.932111	-1.07283	0.958591	sex_indep	none	none	none	none	none	none	none	214526_E11	E11	221745_E6	E6	0	NA	127.089	121	0.07	172.704	142.265
843	chr1	58782473	58782669	197	sex-indep (standard)	TAD64_chr1	none	sex_indep_static (n=64,584)	not_bound	none	0	0	0	0	WE_391	WE	weak_enhancer	enhancer	chr1	58852217	58852219	+	casp8	TAD64_chr1	69549	4.62782	4.46829	1.00231	1.00231	1	sex_indep	none	none	none	none	none	none	none	214532_E6	E6	221755_E6	E6	1	NA	81.588	70	0.22	118.734	142.265
844	chr1	58783942	58784193	252	sex-indep (standard)	TAD64_chr1	STAT5_sDHS	sex_indep_static (n=64,584)	not_bound	none	0	0	0	0	WE_392	WE	weak_enhancer	enhancer	chr1	58852217	58852219	+	casp8	TAD64_chr1	68025	4.62782	4.46829	1.00231	1.00231	1	sex_indep	none	none	none	none	none	none	none	214536_E6	E6	221759_E6	E6	1	NA	106.692	94	0.18	178.101	126.885
845	chr1	58800231	58800361	131	sex-indep (standard)	TAD64_chr1	STAT5_sDHS	sex_indep_static (n=64,584)	not_bound	none	0	0	0	0	WE_393	WE	weak_enhancer	enhancer	chr1	58852217	58852219	+	casp8	TAD64_chr1	51857	4.62782	4.46829	1.00231	1.00231	1	sex_indep	none	none	static	static	none	none	none	214540_E14	E14	221765_E6	E6	0	NA	91.002	85	0.1	102.543	115.35
846	chr1	58801576	58801815	240	sex-indep (standard)	TAD64_chr1	none	sex_indep_static (n=64,584)	not_bound	none	0	0	0	0	WE_394	WE	weak_enhancer	enhancer	chr1	58852217	58852219	+	casp8	TAD64_chr1	50403	4.62782	4.46829	1.00231	1.00231	1	sex_indep	none	none	none	none	none	none	none	214540_E14	E14	221767_E11	E11	0	NA	76.881	73	0.07	107.94	76.9
847	chr1	58818346	58818664	319	sex-indep (standard)	TAD64_chr1	STAT5_sDHS	sex_indep_static (n=64,584)	not_bound	none	0	0	0	0	WE_395	WE	weak_enhancer	enhancer	chr1	58852217	58852219	+	casp8	TAD64_chr1	33554	4.62782	4.46829	1.00231	1.00231	1	sex_indep	none	none	static	none	none	none	none	214544_E5	E5	221772_E11	E11	0	NA	87.864	111	-0.34	161.91	92.28
848	chr1	58830851	58831064	214	sex-indep (robust)	TAD64_chr1	none	sex_indep_static (n=64,584)	not_bound	none	0	0	0	0	WE_396	WE	weak_enhancer	enhancer	chr1	58852217	58852219	+	casp8	TAD64_chr1	21154	4.62782	4.46829	1.00231	1.00231	1	sex_indep	none	none	none	static	none	none	none	214554_E10	E10	221776_E6	E6	0	NA	64.329	61	0.08	145.719	107.66
849	chr1	58851843	58852733	891	sex-indep (robust)	TAD64_chr1	STAT5_sDHS	sex_indep_static (n=64,584)	STAT5_bound	common	575	542	558.5	2	Prom_123	Prom	promoter	promoter	chr1	58852217	58852219	+	casp8	TAD64_chr1	0	4.62782	4.46829	1.00231	1.00231	1	sex_indep	none	none	static	dDHS_open	dDHS_open	static	static	214560_E7	E7	221787_E7	E7	1	NA	1705.5	1546	0.14	1532.75	1449.57
850	chr1	58859263	58859508	246	sex-indep (standard)	TAD64_chr1	STAT5_sDHS	sex_indep_static (n=64,584)	not_bound	none	0	0	0	0	Insul_84	Insul	insulator	insulator	chr1	58859345	58859347	+	casp8	TAD64_chr1	0	4.62782	4.46829	1.00231	1.00231	1	sex_indep	none	none	static	none	static	static	static	214568_E5	E5	221798_E6	E6	0	NA	98.847	89	0.15	156.513	103.815
851	chr1	59002483	59002690	208	sex-indep (standard)	TAD64_chr1	none	sex_indep_static (n=64,584)	STAT5_bound	common	113	39	76	2	WE_397	WE	weak_enhancer	enhancer	chr1	59030324	59030326	-	trak2	TAD64_chr1	27635	2.38364	2.34623	1.02246	1.02246	1	sex_indep	none	none	none	none	none	none	none	214599_E6	E6	221838_E11	E11	0	NA	51.777	27	0.94	37.779	46.14
852	chr1	59002930	59003066	137	sex-indep (standard)	TAD64_chr1	none	sex_indep_static (n=64,584)	STAT5_bound	common	113	39	76	0	WE_398	WE	weak_enhancer	enhancer	chr1	59030324	59030326	-	trak2	TAD64_chr1	27259	2.38364	2.34623	1.02246	1.02246	1	sex_indep	none	none	none	none	none	none	none	214599_E6	E6	221838_E11	E11	0	NA	34.518	36	-0.06	53.97	53.83
853	chr1	59008169	59008468	300	sex-indep (robust)	TAD64_chr1	STAT5_hi_dDHS	sex_indep_dynamic (n=1532)	STAT5_bound	common	800	1096	948	2	Enh_176	Enh	enhancer	enhancer	chr1	59030324	59030326	-	trak2	TAD64_chr1	21857	2.38364	2.34623	1.02246	1.02246	1	sex_indep	none	none	static	static	dDHS_open	dDHS_open	none	214604_E6	E6	221842_E6	E6	1	110	327.921	156	1.07	145.719	226.855
854	chr1	59008761	59008969	209	sex-indep (standard)	TAD64_chr1	none	sex_indep_static (n=64,584)	STAT5_bound	common	800	1096	948	0	Enh_177	Enh	enhancer	enhancer	chr1	59030324	59030326	-	trak2	TAD64_chr1	21356	2.38364	2.34623	1.02246	1.02246	1	sex_indep	none	none	none	none	none	none	none	214606_E6	E6	221843_E9	E9	0	NA	25.104	29	-0.21	37.779	42.295
855	chr1	59014792	59015108	317	sex-indep (robust)	TAD64_chr1	STAT5_sDHS	sex_indep_static (n=64,584)	STAT5_bound	common	107	109	108	0	Enh_178	Enh	enhancer	enhancer	chr1	59030324	59030326	-	trak2	TAD64_chr1	15217	2.38364	2.34623	1.02246	1.02246	1	sex_indep	none	none	static	static	none	none	none	214614_E6	E6	221849_E6	E6	1	NA	150.624	133	0.18	140.322	199.94
856	chr1	59029745	59031295	1551	sex-indep (robust)	TAD64_chr1	STAT5_sDHS	sex_indep_static (n=64,584)	not_bound	none	0	0	0	2	Prom_124	Prom	promoter	promoter	chr1	59030324	59030326	-	trak2	TAD64_chr1	0	2.38364	2.34623	1.02246	1.02246	1	sex_indep	none	none	static	static	static	static	static	214630_E7	E7	221871_E7	E7	1	NA	2566.88	2786	-0.12	2493.41	2026.32
857	chr1	59159037	59159212	176	sex-indep (standard)	TAD64_chr1	STAT5_sDHS	sex_indep_static (n=64,584)	not_bound	none	0	0	0	0	WE_399	WE	weak_enhancer	enhancer	chr1	59151742	59151744	-	als2cr11	TAD64_chr1	7294	0	0	1	1	1	None	none	none	none	none	none	none	none	214650_E6	E6	221900_E11	E11	0	NA	32.949	51	-0.63	21.588	49.985
858	chr1	59167386	59167821	436	sex-indep (robust)	TAD64_chr1	STAT5_sDHS	sex_indep_static (n=64,584)	not_bound	none	0	0	0	0	WE_400	WE	weak_enhancer	enhancer	chr1	59176648	59176650	-	tmem237	TAD64_chr1	8828	1.16119	0.808379	0.715591	-1.39745	0.0834411	None	none	none	none	static	static	none	static	214656_E5	E5	221904_E6	E6	0	NA	169.452	260	-0.62	237.468	161.49
859	chr1	59176481	59177203	723	sex-indep (robust)	TAD64_chr1	STAT5_sDHS	sex_indep_static (n=64,584)	not_bound	none	0	0	0	0	WP_54	WP	weak_promoter	promoter	chr1	59176648	59176650	-	tmem237	TAD64_chr1	0	1.16119	0.808379	0.715591	-1.39745	0.0834411	None	none	none	static	static	static	static	static	214662_E7	E7	221910_E7	E7	1	NA	1295.99	1290	0.01	1117.18	865.125
860	chr1	59214733	59215033	301	sex-indep (robust)	TAD64_chr1	STAT5_sDHS	sex_indep_static (n=64,584)	not_bound	none	0	0	0	0	WE_401	WE	weak_enhancer	enhancer	chr1	59218478	59218480	-	mpp4	TAD64_chr1	3446	0.266723	0.367073	1.41059	1.41059	0.236973	None	none	none	static	static	none	none	static	214674_E6	E6	221921_E6	E6	1	NA	149.055	177	-0.25	156.513	253.77
861	chr1	59231376	59232192	817	sex-indep (robust)	TAD64_chr1	STAT5_sDHS	sex_indep_static (n=64,584)	not_bound	none	0	0	0	0	Enh_179	Enh	enhancer	enhancer	chr1	59220231	59220233	-	mpp4	TAD64_chr1	11144	0.266723	0.367073	1.41059	1.41059	0.236973	None	none	none	static	static	static	static	dDHS_open	214690_E6	E6	221943_E6	E6	1	NA	1407.39	1856	-0.4	1154.96	1822.53
862	chr1	59235014	59235557	544	Female (standard)	TAD64_chr1	STAT5_sDHS	female_bias_static (n=1359)	not_bound	none	0	0	0	0	WE_402	WE	weak_enhancer	enhancer	chr1	59220231	59220233	-	mpp4	TAD64_chr1	14782	0.266723	0.367073	1.41059	1.41059	0.236973	None	none	none	static	dDHS_open	none	none	dDHS_open	214693_E5	E5	221948_E5	E5	1	NA	147.486	235	-0.67	80.955	180.715
863	chr1	59257841	59258818	978	sex-indep (robust)	TAD64_chr1	STAT5_hi_dDHS	sex_indep_dynamic (n=1532)	STAT5_bound	common	589	520	554.5	1	Enh_180	Enh	enhancer	enhancer	chr1	59293935	59293937	-	als2	TAD64_chr1	35118	8.32153	7.74803	0.965014	-1.03625	1	sex_indep	none	none	dDHS_close	static	dDHS_open	dDHS_open	static	214697_E6	E6	221955_E6	E6	1	1110	1926.73	665	1.53	329.217	1057.38
864	chr1	59259182	59259698	517	sex-indep (robust)	TAD64_chr1	STAT5_sDHS	sex_indep_static (n=64,584)	not_bound	none	0	0	0	0	Enh_181	Enh	enhancer	enhancer	chr1	59293935	59293937	-	als2	TAD64_chr1	34238	8.32153	7.74803	0.965014	-1.03625	1	sex_indep	none	none	static	static	none	none	none	214699_E6	E6	221957_E6	E6	1	NA	326.352	284	0.2	210.483	357.585
865	chr1	59265310	59265859	550	sex-indep (standard)	TAD64_chr1	STAT5_sDHS	sex_indep_static (n=64,584)	not_bound	none	0	0	0	0	Enh_182	Enh	enhancer	enhancer	chr1	59293935	59293937	-	als2	TAD64_chr1	28077	8.32153	7.74803	0.965014	-1.03625	1	sex_indep	none	none	none	static	none	none	none	214701_E6	E6	221959_E6	E6	1	NA	444.027	365	0.28	329.217	480.625
866	chr1	59268510	59269569	1060	sex-indep (robust)	TAD64_chr1	STAT5_sDHS	sex_indep_static (n=64,584)	STAT5_bound	male_enriched	436	106	271	2	Enh_183	Enh	enhancer	enhancer	chr1	59293935	59293937	-	als2	TAD64_chr1	24367	8.32153	7.74803	0.965014	-1.03625	1	sex_indep	none	none	dDHS_close	static	dDHS_open	dDHS_open	static	214705_E6	E6	221963_E6	E6	1	NA	3792.27	2383	0.67	2531.19	3229.8
867	chr1	59293679	59295072	1394	sex-indep (robust)	TAD64_chr1	STAT5_sDHS	sex_indep_static (n=64,584)	not_bound	none	0	0	0	2	Prom_125	Prom	promoter	promoter	chr1	59293935	59293937	-	als2	TAD64_chr1	0	8.32153	7.74803	0.965014	-1.03625	1	sex_indep	none	none	static	static	static	static	static	214736_E7	E7	221990_E7	E7	1	NA	2402.14	2324	0.05	2142.61	2091.68
868	chr1	59373699	59373924	226	sex-indep (standard)	TAD65_chr1	STAT5_sDHS	sex_indep_static (n=64,584)	not_bound	none	0	0	0	0	Insul_85	Insul	insulator	insulator	chr1	59411686	59411688	-	nc_as_c1_231	TAD65_chr1	37763	0.0132288	0.388392	21.1068	21.1068	2.18429e-05	Male	no_response	none	none	static	none	static	none	214752_E6	E6	222004_E6	E6	1	NA	219.66	243	-0.15	107.94	188.405
869	chr1	59378170	59380042	1873	sex-indep (robust)	TAD65_chr1	STAT5_sDHS	sex_indep_static (n=64,584)	STAT5_bound	common	676	389	532.5	1	Enh_184	Enh	enhancer	enhancer	chr1	59411686	59411688	-	nc_as_c1_231	TAD65_chr1	31645	0.0132288	0.388392	21.1068	21.1068	2.18429e-05	Male	no_response	none	dDHS_close	dDHS_close	static	static	static	214758_E6	E6	222010_E6	E6	1	NA	3586.73	3667	-0.03	2083.24	4187.2
870	chr1	59418389	59418557	169	sex-indep (standard)	TAD65_chr1	none	sex_indep_static (n=64,584)	not_bound	none	0	0	0	0	WE_403	WE	weak_enhancer	enhancer	chr1	59411686	59411688	-	nc_as_c1_231	TAD65_chr1	6702	0.0132288	0.388392	21.1068	21.1068	2.18429e-05	Male	no_response	none	none	none	none	none	none	214769_E6	E6	222025_E8	E8	0	NA	26.673	21	0.34	70.161	53.83
871	chr1	59418912	59419133	222	sex-indep (standard)	TAD65_chr1	none	sex_indep_static (n=64,584)	not_bound	none	0	0	0	0	WE_404	WE	weak_enhancer	enhancer	chr1	59411686	59411688	-	nc_as_c1_231	TAD65_chr1	7225	0.0132288	0.388392	21.1068	21.1068	2.18429e-05	Male	no_response	none	static	none	none	none	none	214771_E6	E6	222025_E8	E8	0	NA	37.656	56	-0.57	75.558	84.59
872	chr1	59419568	59419716	149	sex-indep (standard)	TAD65_chr1	none	sex_indep_static (n=64,584)	not_bound	none	0	0	0	0	WE_405	WE	weak_enhancer	enhancer	chr1	59411686	59411688	-	nc_as_c1_231	TAD65_chr1	7881	0.0132288	0.388392	21.1068	21.1068	2.18429e-05	Male	no_response	none	none	none	none	none	none	214774_E5	E5	222026_E12	E12	0	NA	12.552	19	-0.6	59.367	19.225
873	chr1	59424845	59425387	543	sex-indep (robust)	TAD65_chr1	STAT5_sDHS	sex_indep_static (n=64,584)	STAT5_bound	female_enriched	166	240	203	0	WE_406	WE	weak_enhancer	enhancer	chr1	59411686	59411688	-	nc_as_c1_231	TAD65_chr1	13158	0.0132288	0.388392	21.1068	21.1068	2.18429e-05	Male	no_response	none	static	dDHS_close	none	none	none	214778_E6	E6	222032_E6	E6	1	NA	425.199	439	-0.05	242.865	715.17
874	chr1	59437906	59438081	176	sex-indep (standard)	TAD65_chr1	none	sex_indep_static (n=64,584)	not_bound	none	0	0	0	0	WE_407	WE	weak_enhancer	enhancer	chr1	59441546	59441548	-	nc_inter_c1_234	TAD65_chr1	3466	0.570655	1.34258	2.30085	2.30085	0.00369493	Male	class_I	IA	none	none	none	none	none	214784_E6	E6	222043_E6	E6	1	NA	53.346	44	0.28	53.97	49.985
875	chr1	59439412	59440510	1099	sex-indep (robust)	TAD65_chr1	STAT5_sDHS	sex_indep_static (n=64,584)	STAT5_bound	common	258	323	290.5	0	Enh_185	Enh	enhancer	enhancer	chr1	59441546	59441548	-	nc_inter_c1_234	TAD65_chr1	1037	0.570655	1.34258	2.30085	2.30085	0.00369493	Male	class_I	IA	dDHS_close	dDHS_close	static	static	static	214789_E6	E6	222047_E6	E6	1	NA	1438.77	1267	0.18	528.906	2153.2
876	chr1	59442557	59442885	329	sex-indep (robust)	TAD65_chr1	STAT5_sDHS	sex_indep_static (n=64,584)	STAT5_bound	common	129	53	91	1	WE_408	WE	weak_enhancer	enhancer	chr1	59441546	59441548	-	nc_inter_c1_234	TAD65_chr1	1010	0.570655	1.34258	2.30085	2.30085	0.00369493	Male	class_I	IA	static	dDHS_close	none	none	none	214791_E6	E6	222051_E6	E6	1	NA	365.577	371	-0.02	113.337	592.13
877	chr1	59445707	59446552	846	sex-indep (robust)	TAD65_chr1	STAT5_sDHS	sex_indep_static (n=64,584)	STAT5_bound	common	112	79	95.5	1	Prom_126	Prom	promoter	promoter	chr1	59441546	59441548	-	nc_inter_c1_234	TAD65_chr1	4160	0.570655	1.34258	2.30085	2.30085	0.00369493	Male	class_I	IA	dDHS_close	dDHS_close	static	static	static	214798_E7	E7	222055_E6	E6	0	NA	1711.78	1541	0.15	313.026	2014.78
878	chr1	59448729	59448903	175	sex-indep (robust)	TAD65_chr1	none	sex_indep_static (n=64,584)	not_bound	none	0	0	0	0	WE_409	WE	weak_enhancer	enhancer	chr1	59441546	59441548	-	nc_inter_c1_234	TAD65_chr1	7182	0.570655	1.34258	2.30085	2.30085	0.00369493	Male	class_I	IA	none	none	none	none	none	214803_E11	E11	222059_E11	E11	1	NA	76.881	79	-0.04	37.779	138.42
879	chr1	59453283	59453532	250	sex-indep (robust)	TAD65_chr1	STAT5_sDHS	sex_indep_static (n=64,584)	not_bound	none	0	0	0	1	WE_410	WE	weak_enhancer	enhancer	chr1	59441546	59441548	-	nc_inter_c1_234	TAD65_chr1	11736	0.570655	1.34258	2.30085	2.30085	0.00369493	Male	class_I	IA	static	static	none	none	none	214809_E6	E6	222065_E6	E6	1	NA	76.881	106	-0.46	97.146	111.505
880	chr1	59460730	59460987	258	sex-indep (robust)	TAD65_chr1	STAT5_sDHS	sex_indep_static (n=64,584)	not_bound	none	0	0	0	1	WE_411	WE	weak_enhancer	enhancer	chr1	59465465	59465467	+	nc_inter_c1_236	TAD65_chr1	4479	0.01178	0.00259212	0.253593	-3.94333	0.833396	None	none	none	static	static	static	none	none	214820_E6	E6	222071_E6	E6	1	NA	203.97	156	0.39	129.528	276.84
881	chr1	59470048	59470560	513	sex-indep (robust)	TAD65_chr1	STAT5_sDHS	sex_indep_static (n=64,584)	not_bound	none	0	0	0	0	WE_412	WE	weak_enhancer	enhancer	chr1	59465465	59465467	+	nc_inter_c1_236	TAD65_chr1	4582	0.01178	0.00259212	0.253593	-3.94333	0.833396	None	none	none	static	dDHS_close	static	static	static	214831_E6	E6	222082_E6	E6	1	NA	291.834	310	-0.09	205.086	492.16
882	chr1	59475650	59475893	244	sex-indep (robust)	TAD65_chr1	STAT5_sDHS	sex_indep_static (n=64,584)	not_bound	none	0	0	0	0	WE_413	WE	weak_enhancer	enhancer	chr1	59475882	59475884	-	nc_inter_c1_235	TAD65_chr1	0	0.803847	0.74061	0.906211	-1.1035	1	None	none	none	none	none	none	none	none	214836_E6	E6	222089_E6	E6	1	NA	70.605	84	-0.25	75.558	99.97
883	chr1	59479713	59480217	505	sex-indep (standard)	TAD65_chr1	none	sex_indep_static (n=64,584)	not_bound	none	0	0	0	0	Enh_186	Enh	enhancer	enhancer	chr1	59475882	59475884	-	nc_inter_c1_235	TAD65_chr1	3830	0.803847	0.74061	0.906211	-1.1035	1	None	none	none	none	none	none	none	none	214840_E6	E6	222094_E6	E6	1	NA	141.21	154	-0.13	151.116	146.11
884	chr1	59480384	59481045	662	sex-indep (robust)	TAD65_chr1	STAT5_sDHS	sex_indep_static (n=64,584)	STAT5_bound	common	232	124	178	4	Enh_187	Enh	enhancer	enhancer	chr1	59475882	59475884	-	nc_inter_c1_235	TAD65_chr1	4501	0.803847	0.74061	0.906211	-1.1035	1	None	none	none	static	dDHS_close	dDHS_open	static	static	214840_E6	E6	222094_E6	E6	1	NA	1027.69	752	0.45	388.584	769
885	chr1	59483247	59483412	166	sex-indep (standard)	TAD65_chr1	none	sex_indep_static (n=64,584)	not_bound	none	0	0	0	0	Enh_188	Enh	enhancer	enhancer	chr1	59475882	59475884	-	nc_inter_c1_235	TAD65_chr1	7364	0.803847	0.74061	0.906211	-1.1035	1	None	none	none	none	none	none	none	none	214846_E6	E6	222100_E6	E6	1	NA	50.208	63	-0.33	43.176	42.295
886	chr1	59487169	59487365	197	sex-indep (robust)	TAD65_chr1	none	sex_indep_static (n=64,584)	not_bound	none	0	0	0	0	WE_414	WE	weak_enhancer	enhancer	chr1	59475882	59475884	-	nc_inter_c1_235	TAD65_chr1	11286	0.803847	0.74061	0.906211	-1.1035	1	None	none	none	none	none	none	none	none	214851_E11	E11	222106_E6	E6	0	NA	47.07	41	0.2	80.955	57.675
887	chr1	59492977	59493936	960	sex-indep (robust)	TAD65_chr1	STAT5_sDHS	sex_indep_static (n=64,584)	not_bound	none	0	0	0	0	WE_415	WE	weak_enhancer	enhancer	chr1	59475882	59475884	-	nc_inter_c1_235	TAD65_chr1	17094	0.803847	0.74061	0.906211	-1.1035	1	None	none	none	static	dDHS_close	static	static	static	214855_E6	E6	222112_E6	E6	1	NA	1939.28	2111	-0.12	2083.24	3210.57
888	chr1	59495946	59496939	994	sex-indep (robust)	TAD65_chr1	STAT5_sDHS	sex_indep_static (n=64,584)	STAT5_bound	common	118	111	114.5	1	Enh_189	Enh	enhancer	enhancer	chr1	59475882	59475884	-	nc_inter_c1_235	TAD65_chr1	20063	0.803847	0.74061	0.906211	-1.1035	1	None	none	none	static	static	static	static	static	214857_E6	E6	222114_E6	E6	1	NA	728.016	707	0.04	733.992	1122.74
890	chr1	59543289	59543483	195	sex-indep (robust)	TAD65_chr1	none	sex_indep_static (n=64,584)	not_bound	none	0	0	0	0	WP_55	WP	weak_promoter	promoter	chr1	59538990	59538992	+	fzd7	TAD65_chr1	4298	2.76358	2.78481	1.04641	1.04641	1	sex_indep	none	none	none	none	none	none	none	214868_E7	E7	222131_E8	E8	0	NA	169.452	130	0.38	86.352	149.955
891	chr1	59544125	59544759	635	Male (robust)	TAD65_chr1	STAT5_hi_dDHS	male_bias_dynamic (n=834)	STAT5_bound	common	276	111	193.5	3	WP_56	WP	weak_promoter	promoter	chr1	59538990	59538992	+	fzd7	TAD65_chr1	5134	2.76358	2.78481	1.04641	1.04641	1	sex_indep	none	none	dDHS_close	static	dDHS_open	dDHS_open	static	214870_E7	E7	222131_E8	E8	0	1110	1095.16	588	0.9	345.408	511.385
892	chr1	59555144	59555288	145	sex-indep (standard)	TAD65_chr1	STAT5_sDHS	sex_indep_static (n=64,584)	not_bound	none	0	0	0	0	Enh_190	Enh	enhancer	enhancer	chr1	59560707	59560709	+	nc_inter_c1_238	TAD65_chr1	5420	0.801051	0.948776	1.15999	1.15999	1	None	none	none	static	static	none	none	none	214879_E9	E9	222139_E6	E6	0	NA	145.917	159	-0.12	91.749	119.195
893	chr1	59560485	59560980	496	sex-indep (robust)	TAD65_chr1	STAT5_sDHS	sex_indep_static (n=64,584)	STAT5_bound	common	281	93	187	0	Enh_191	Enh	enhancer	enhancer	chr1	59560707	59560709	+	nc_inter_c1_238	TAD65_chr1	0	0.801051	0.948776	1.15999	1.15999	1	None	none	none	static	static	static	static	static	214884_E6	E6	222143_E6	E6	1	NA	699.774	761	-0.12	599.067	622.89
894	chr1	59680309	59680456	148	sex-indep (standard)	TAD65_chr1	STAT5_sDHS	sex_indep_static (n=64,584)	not_bound	none	0	0	0	0	Insul_86	Insul	insulator	insulator	chr1	59573107	59573109	+	gm973	TAD65_chr1	107201	0.00326966	0.00463042	1.74872	1.74872	1	None	none	none	static	none	none	none	none	214908_E12	E12	222176_E1	E1	0	NA	42.363	65	-0.62	70.161	84.59
895	chr1	59682360	59682523	164	sex-indep (standard)	TAD65_chr1	none	sex_indep_static (n=64,584)	not_bound	none	0	0	0	0	WE_416	WE	weak_enhancer	enhancer	chr1	59573107	59573109	+	gm973	TAD65_chr1	109252	0.00326966	0.00463042	1.74872	1.74872	1	None	none	none	none	none	none	none	none	214909_E2	E2	222177_E12	E12	0	NA	39.225	23	0.77	32.382	49.985
896	chr1	59726801	59727220	420	sex-indep (robust)	TAD66_chr1	STAT5_sDHS	sex_indep_static (n=64,584)	not_bound	none	0	0	0	0	Prom_127	Prom	promoter	promoter	chr1	59727676	59727678	-	sumo1	TAD66_chr1	457	14.2097	13.5883	0.996453	-1.00356	1	sex_indep	none	none	dDHS_open	static	static	static	static	214928_E7	E7	222194_E7	E7	1	NA	246.333	242	0.03	512.715	196.095
897	chr1	59727443	59727894	452	sex-indep (robust)	TAD66_chr1	STAT5_sDHS	sex_indep_static (n=64,584)	not_bound	none	0	0	0	0	Prom_128	Prom	promoter	promoter	chr1	59727676	59727678	-	sumo1	TAD66_chr1	0	14.2097	13.5883	0.996453	-1.00356	1	sex_indep	none	none	static	static	static	static	static	214928_E7	E7	222194_E7	E7	1	NA	381.267	412	-0.11	507.318	242.235
898	chr1	59741360	59742091	732	sex-indep (robust)	TAD66_chr1	STAT5_sDHS	sex_indep_static (n=64,584)	STAT5_bound	common	234	234	234	3	Prom_129	Prom	promoter	promoter	chr1	59741849	59741851	+	nop58	TAD66_chr1	0	6.07667	5.52282	0.941552	-1.06208	1	sex_indep	none	none	dDHS_close	dDHS_open	static	dDHS_open	dDHS_open	214936_E7	E7	222204_E7	E7	1	NA	1674.12	1638	0.03	1214.33	1614.9
899	chr1	59742619	59742761	143	sex-indep (standard)	TAD66_chr1	none	sex_indep_static (n=64,584)	STAT5_bound	common	234	234	234	2	Prom_130	Prom	promoter	promoter	chr1	59741849	59741851	+	nop58	TAD66_chr1	769	6.07667	5.52282	0.941552	-1.06208	1	sex_indep	none	none	none	none	none	none	none	214938_E7	E7	222205_E8	E8	0	NA	47.07	32	0.56	53.97	69.21
900	chr1	59819654	59821073	1420	sex-indep (robust)	TAD66_chr1	STAT5_sDHS	sex_indep_static (n=64,584)	not_bound	none	0	0	0	2	Prom_131	Prom	promoter	promoter	chr1	59821122	59821124	+	bmpr2	TAD66_chr1	50	1.97305	1.90316	1.0031	1.0031	1	sex_indep	none	none	dDHS_open	static	static	static	static	214951_E7	E7	222216_E7	E7	1	NA	1137.53	1217	-0.1	1467.98	680.565
901	chr1	59821558	59821747	190	sex-indep (standard)	TAD66_chr1	none	sex_indep_static (n=64,584)	not_bound	none	0	0	0	0	Prom_132	Prom	promoter	promoter	chr1	59821122	59821124	+	bmpr2	TAD66_chr1	435	1.97305	1.90316	1.0031	1.0031	1	sex_indep	none	none	none	none	none	none	none	214951_E7	E7	222218_E7	E7	1	NA	103.554	86	0.27	64.764	84.59
902	chr1	59959540	59959817	278	sex-indep (robust)	TAD66_chr1	STAT5_sDHS	sex_indep_static (n=64,584)	not_bound	none	0	0	0	0	WE_417	WE	weak_enhancer	enhancer	chr1	59969849	59969851	+	fam117b	TAD66_chr1	10033	1.03377	1.00561	1.00626	1.00626	1	sex_indep	none	none	static	static	static	static	static	214986_E10	E10	222260_E10	E10	1	NA	177.297	151	0.23	205.086	169.18
903	chr1	59969340	59970042	703	sex-indep (robust)	TAD66_chr1	STAT5_sDHS	sex_indep_static (n=64,584)	not_bound	none	0	0	0	2	Prom_133	Prom	promoter	promoter	chr1	59969849	59969851	+	fam117b	TAD66_chr1	0	1.03377	1.00561	1.00626	1.00626	1	sex_indep	none	none	static	static	static	static	static	214989_E7	E7	222263_E7	E7	1	NA	599.358	663	-0.15	669.228	426.795
904	chr1	59970273	59970535	263	sex-indep (robust)	TAD66_chr1	none	sex_indep_static (n=64,584)	not_bound	none	0	0	0	0	WP_57	WP	weak_promoter	promoter	chr1	59969849	59969851	+	fam117b	TAD66_chr1	423	1.03377	1.00561	1.00626	1.00626	1	sex_indep	none	none	none	none	none	none	none	214989_E7	E7	222263_E7	E7	1	NA	32.949	44	-0.42	129.528	34.605
905	chr1	60154292	60155639	1348	sex-indep (robust)	TAD67_chr1	STAT5_sDHS	sex_indep_static (n=64,584)	not_bound	none	0	0	0	1	Prom_134	Prom	promoter	promoter	chr1	60154749	60154751	-	wdr12	TAD67_chr1	0	1.99397	1.81634	0.943048	-1.06039	1	sex_indep	none	none	static	dDHS_open	static	static	static	215021_E7	E7	222293_E7	E7	1	NA	3853.46	3922	-0.03	4204.26	2864.53
906	chr1	60203797	60204073	277	sex-indep (robust)	TAD67_chr1	STAT5_sDHS	sex_indep_static (n=64,584)	not_bound	none	0	0	0	0	WE_418	WE	weak_enhancer	enhancer	chr1	60237442	60237444	+	nbeal1	TAD67_chr1	33370	0.540329	0.501824	0.967186	-1.03393	1	None	none	none	static	static	none	none	none	215034_E6	E6	222309_E6	E6	1	NA	95.709	127	-0.41	102.543	173.025
907	chr1	60227264	60227374	111	sex-indep (standard)	TAD67_chr1	STAT5_sDHS	sex_indep_static (n=64,584)	not_bound	none	0	0	0	0	WE_419	WE	weak_enhancer	enhancer	chr1	60237442	60237444	+	nbeal1	TAD67_chr1	10069	0.540329	0.501824	0.967186	-1.03393	1	None	none	none	static	none	none	none	none	215042_E6	E6	222318_E6	E6	1	NA	48.639	46	0.08	21.588	65.365
908	chr1	60236878	60238178	1301	sex-indep (robust)	TAD67_chr1	STAT5_sDHS	sex_indep_static (n=64,584)	not_bound	none	0	0	0	0	Prom_135	Prom	promoter	promoter	chr1	60237442	60237444	+	nbeal1	TAD67_chr1	0	0.540329	0.501824	0.967186	-1.03393	1	None	none	none	static	static	static	static	static	215051_E7	E7	222326_E7	E7	1	NA	2409.98	2786	-0.21	2336.9	1991.71
909	chr1	60326275	60326418	144	sex-indep (standard)	TAD67_chr1	STAT5_sDHS	sex_indep_static (n=64,584)	not_bound	none	0	0	0	0	WE_420	WE	weak_enhancer	enhancer	chr1	60400215	60400217	+	cyp20a1	TAD67_chr1	73798	5.29947	4.52227	0.886038	-1.12862	0.737705	sex_indep	none	none	none	static	none	none	none	215064_E11	E11	222332_E11	E11	1	NA	50.208	61	-0.28	64.764	130.73
910	chr1	60350807	60351298	492	sex-indep (robust)	TAD67_chr1	STAT5_sDHS	sex_indep_static (n=64,584)	not_bound	none	0	0	0	1	WE_421	WE	weak_enhancer	enhancer	chr1	60400215	60400217	+	cyp20a1	TAD67_chr1	48918	5.29947	4.52227	0.886038	-1.12862	0.737705	sex_indep	none	none	static	dDHS_close	static	static	static	215069_E6	E6	222335_E6	E6	1	NA	1062.21	977	0.12	507.318	1249.62
911	chr1	60399799	60400695	897	sex-indep (robust)	TAD67_chr1	STAT5_sDHS	sex_indep_static (n=64,584)	not_bound	none	0	0	0	1	WP_58	WP	weak_promoter	promoter	chr1	60400215	60400217	+	cyp20a1	TAD67_chr1	0	5.29947	4.52227	0.886038	-1.12862	0.737705	sex_indep	none	none	static	static	static	static	static	215082_E7	E7	222346_E7	E7	1	NA	1018.28	1054	-0.05	1252.1	738.24
912	chr1	60402544	60402903	360	sex-indep (robust)	TAD67_chr1	none	sex_indep_static (n=64,584)	not_bound	none	0	0	0	2	WE_422	WE	weak_enhancer	enhancer	chr1	60400215	60400217	+	cyp20a1	TAD67_chr1	2328	5.29947	4.52227	0.886038	-1.12862	0.737705	sex_indep	none	none	static	static	static	static	static	215084_E10	E10	222349_E5	E5	0	NA	89.433	81	0.14	172.704	184.56
913	chr1	60465960	60467061	1102	sex-indep (robust)	TAD67_chr1	STAT5_sDHS	sex_indep_static (n=64,584)	not_bound	none	0	0	0	0	WP_59	WP	weak_promoter	promoter	chr1	60466462	60466464	+	abi2	TAD67_chr1	0	0.596259	0.539916	0.935906	-1.06848	1	None	none	none	static	dDHS_open	static	static	static	215104_E7	E7	222369_E12	E12	0	NA	546.012	550	-0.01	798.756	388.345
914	chr1	60517591	60517822	232	sex-indep (standard)	TAD67_chr1	STAT5_sDHS	sex_indep_static (n=64,584)	not_bound	none	0	0	0	2	WE_423	WE	weak_enhancer	enhancer	chr1	60466462	60466464	+	abi2	TAD67_chr1	51128	0.596259	0.539916	0.935906	-1.06848	1	None	none	none	static	static	none	static	static	215110_E5	E5	222379_E13	E13	0	NA	100.416	61	0.72	151.116	142.265
915	chr1	60619936	60620220	285	sex-indep (robust)	TAD67_chr1	STAT5_sDHS	sex_indep_static (n=64,584)	not_bound	none	0	0	0	0	WE_424	WE	weak_enhancer	enhancer	chr1	60623607	60623609	-	raph1	TAD67_chr1	3388	6.74741	5.45981	0.839832	-1.19071	0.340914	sex_indep	none	none	static	static	none	none	none	215137_E6	E6	222405_E6	E6	1	NA	349.887	365	-0.06	340.011	457.555
916	chr1	60622066	60622645	580	sex-indep (standard)	TAD67_chr1	none	sex_indep_static (n=64,584)	not_bound	none	0	0	0	0	Prom_136	Prom	promoter	promoter	chr1	60623607	60623609	-	raph1	TAD67_chr1	963	6.74741	5.45981	0.839832	-1.19071	0.340914	sex_indep	none	none	none	none	none	none	none	215140_E7	E7	222408_E7	E7	1	NA	318.507	346	-0.12	377.79	322.98
917	chr1	60622896	60624353	1458	sex-indep (robust)	TAD67_chr1	STAT5_sDHS	sex_indep_static (n=64,584)	not_bound	none	0	0	0	1	Prom_137	Prom	promoter	promoter	chr1	60623607	60623609	-	raph1	TAD67_chr1	0	6.74741	5.45981	0.839832	-1.19071	0.340914	sex_indep	none	none	static	dDHS_open	static	static	static	215142_E7	E7	222410_E7	E7	1	NA	1685.11	1575	0.1	2045.46	1241.93
918	chr1	60628276	60628794	519	sex-indep (robust)	TAD67_chr1	STAT5_sDHS	sex_indep_static (n=64,584)	STAT5_bound	common	125	44	84.5	0	WE_425	WE	weak_enhancer	enhancer	chr1	60623607	60623609	-	raph1	TAD67_chr1	4668	6.74741	5.45981	0.839832	-1.19071	0.340914	sex_indep	none	none	static	static	static	dDHS_open	static	215147_E6	E6	222415_E9	E9	0	NA	815.88	627	0.38	680.022	807.45
919	chr1	60653161	60654041	881	sex-indep (robust)	TAD67_chr1	STAT5_sDHS	sex_indep_static (n=64,584)	STAT5_bound	common	213	139	176	1	WE_426	WE	weak_enhancer	enhancer	chr1	60649458	60649460	+	nc_inter_c1_254	TAD67_chr1	3702	0.314377	0.222299	0.694718	-1.43943	0.360153	None	none	none	dDHS_close	static	static	dDHS_open	static	215156_E6	E6	222427_E6	E6	1	NA	1432.5	953	0.59	928.284	1322.68
920	chr1	60655338	60655502	165	sex-indep (standard)	TAD67_chr1	none	sex_indep_static (n=64,584)	not_bound	none	0	0	0	2	WE_427	WE	weak_enhancer	enhancer	chr1	60649458	60649460	+	nc_inter_c1_254	TAD67_chr1	5879	0.314377	0.222299	0.694718	-1.43943	0.360153	None	none	none	none	none	none	none	none	215157_E9	E9	222430_E9	E9	1	NA	81.588	35	1.22	102.543	53.83
921	chr1	60655648	60656570	923	sex-indep (robust)	TAD67_chr1	STAT5_sDHS	sex_indep_static (n=64,584)	STAT5_bound	female_enriched	734	1676	1205	6	Enh_192	Enh	enhancer	enhancer	chr1	60649458	60649460	+	nc_inter_c1_254	TAD67_chr1	6189	0.314377	0.222299	0.694718	-1.43943	0.360153	None	none	none	dDHS_close	dDHS_open	dDHS_open	dDHS_open	static	215158_E6	E6	222431_E6	E6	1	NA	4148.44	2362	0.81	2191.18	3952.66
922	chr1	60665902	60666120	219	sex-indep (standard)	TAD67_chr1	none	sex_indep_static (n=64,584)	not_bound	none	0	0	0	2	WE_428	WE	weak_enhancer	enhancer	chr1	60649458	60649460	+	nc_inter_c1_254	TAD67_chr1	16443	0.314377	0.222299	0.694718	-1.43943	0.360153	None	none	none	none	none	none	none	none	215163_E6	E6	222441_E6	E6	1	NA	70.605	55	0.36	97.146	42.295
923	chr1	60666361	60666509	149	sex-indep (standard)	TAD67_chr1	STAT5_sDHS	sex_indep_static (n=64,584)	not_bound	none	0	0	0	0	WE_429	WE	weak_enhancer	enhancer	chr1	60649458	60649460	+	nc_inter_c1_254	TAD67_chr1	16902	0.314377	0.222299	0.694718	-1.43943	0.360153	None	none	none	static	none	none	none	none	215164_E9	E9	222443_E6	E6	0	NA	69.036	72	-0.06	86.352	65.365
924	chr1	60668860	60669199	340	sex-indep (standard)	TAD67_chr1	STAT5_sDHS	sex_indep_static (n=64,584)	not_bound	none	0	0	0	0	WE_430	WE	weak_enhancer	enhancer	chr1	60649458	60649460	+	nc_inter_c1_254	TAD67_chr1	19401	0.314377	0.222299	0.694718	-1.43943	0.360153	None	none	none	static	static	dDHS_open	dDHS_open	none	215166_E6	E6	222447_E6	E6	1	NA	199.263	128	0.64	113.337	130.73
925	chr1	60680376	60680625	250	sex-indep (robust)	TAD67_chr1	STAT5_sDHS	sex_indep_static (n=64,584)	not_bound	none	0	0	0	0	WE_431	WE	weak_enhancer	enhancer	chr1	60649458	60649460	+	nc_inter_c1_254	TAD67_chr1	30917	0.314377	0.222299	0.694718	-1.43943	0.360153	None	none	none	static	static	none	none	none	215173_E10	E10	222453_E10	E10	1	NA	95.709	115	-0.26	113.337	149.955
926	chr1	60694009	60694177	169	sex-indep (robust)	TAD67_chr1	STAT5_sDHS	sex_indep_static (n=64,584)	not_bound	none	0	0	0	0	WE_432	WE	weak_enhancer	enhancer	chr1	60649458	60649460	+	nc_inter_c1_254	TAD67_chr1	44550	0.314377	0.222299	0.694718	-1.43943	0.360153	None	none	none	static	none	none	none	none	215181_E6	E6	222461_E6	E6	1	NA	130.227	99	0.4	91.749	149.955
927	chr1	60698159	60698701	543	sex-indep (robust)	TAD67_chr1	STAT5_sDHS	sex_indep_static (n=64,584)	not_bound	none	0	0	0	1	WE_433	WE	weak_enhancer	enhancer	chr1	60649458	60649460	+	nc_inter_c1_254	TAD67_chr1	48700	0.314377	0.222299	0.694718	-1.43943	0.360153	None	none	none	static	static	static	static	static	215190_E7	E7	222468_E6	E6	0	NA	1332.08	1556	-0.22	1041.62	1495.7
928	chr1	60699102	60699359	258	sex-indep (robust)	TAD67_chr1	STAT5_sDHS	sex_indep_static (n=64,584)	not_bound	none	0	0	0	0	WE_434	WE	weak_enhancer	enhancer	chr1	60649458	60649460	+	nc_inter_c1_254	TAD67_chr1	49643	0.314377	0.222299	0.694718	-1.43943	0.360153	None	none	none	static	none	none	static	static	215193_E6	E6	222470_E6	E6	1	NA	188.28	154	0.29	156.513	249.925
929	chr1	60707043	60707328	286	sex-indep (robust)	TAD67_chr1	STAT5_sDHS	sex_indep_static (n=64,584)	not_bound	none	0	0	0	0	WE_435	WE	weak_enhancer	enhancer	chr1	60649458	60649460	+	nc_inter_c1_254	TAD67_chr1	57584	0.314377	0.222299	0.694718	-1.43943	0.360153	None	none	none	none	static	none	none	none	215198_E6	E6	222479_E6	E6	1	NA	100.416	108	-0.11	167.307	138.42
930	chr1	60709526	60709876	351	sex-indep (robust)	TAD67_chr1	STAT5_sDHS	sex_indep_static (n=64,584)	not_bound	none	0	0	0	0	WE_436	WE	weak_enhancer	enhancer	chr1	60649458	60649460	+	nc_inter_c1_254	TAD67_chr1	60067	0.314377	0.222299	0.694718	-1.43943	0.360153	None	none	none	static	none	none	none	static	215202_E6	E6	222484_E5	E5	0	NA	127.089	131	-0.04	242.865	226.855
931	chr1	60712084	60712880	797	sex-indep (robust)	TAD67_chr1	none	sex_indep_static (n=64,584)	not_bound	none	0	0	0	4	WE_437	WE	weak_enhancer	enhancer	chr1	60649458	60649460	+	nc_inter_c1_254	TAD67_chr1	62625	0.314377	0.222299	0.694718	-1.43943	0.360153	None	none	none	static	static	static	static	static	215205_E6	E6	222486_E5	E5	0	NA	411.078	412	0	793.359	592.13
932	chr1	60713945	60714189	245	sex-indep (robust)	TAD67_chr1	none	sex_indep_static (n=64,584)	not_bound	none	0	0	0	0	WE_438	WE	weak_enhancer	enhancer	chr1	60649458	60649460	+	nc_inter_c1_254	TAD67_chr1	64486	0.314377	0.222299	0.694718	-1.43943	0.360153	None	none	none	none	none	none	none	none	215206_E10	E10	222489_E6	E6	0	NA	94.14	124	-0.4	97.146	157.645
933	chr1	60714455	60714717	263	sex-indep (standard)	TAD67_chr1	none	sex_indep_static (n=64,584)	not_bound	none	0	0	0	2	WE_439	WE	weak_enhancer	enhancer	chr1	60649458	60649460	+	nc_inter_c1_254	TAD67_chr1	64996	0.314377	0.222299	0.694718	-1.43943	0.360153	None	none	none	none	none	none	none	none	215208_E6	E6	222491_E6	E6	1	NA	65.898	74	-0.17	86.352	61.52
934	chr1	60715323	60716152	830	sex-indep (robust)	TAD67_chr1	STAT5_sDHS	sex_indep_static (n=64,584)	not_bound	none	0	0	0	0	Enh_193	Enh	enhancer	enhancer	chr1	60649458	60649460	+	nc_inter_c1_254	TAD67_chr1	65864	0.314377	0.222299	0.694718	-1.43943	0.360153	None	none	none	static	static	static	static	static	215210_E6	E6	222493_E6	E6	1	NA	809.604	988	-0.29	793.359	538.3
935	chr1	60716412	60716839	428	sex-indep (robust)	TAD67_chr1	STAT5_sDHS	sex_indep_static (n=64,584)	STAT5_bound	common	357	177	267	0	Enh_194	Enh	enhancer	enhancer	chr1	60649458	60649460	+	nc_inter_c1_254	TAD67_chr1	66953	0.314377	0.222299	0.694718	-1.43943	0.360153	None	none	none	static	static	static	static	dDHS_open	215212_E6	E6	222495_E6	E6	1	NA	866.088	808	0.1	685.419	853.59
936	chr1	60718641	60719745	1105	sex-indep (robust)	TAD67_chr1	STAT5_sDHS	sex_indep_static (n=64,584)	STAT5_bound	common	117	89	103	1	Enh_195	Enh	enhancer	enhancer	chr1	60649458	60649460	+	nc_inter_c1_254	TAD67_chr1	69182	0.314377	0.222299	0.694718	-1.43943	0.360153	None	none	none	static	static	static	static	static	215214_E6	E6	222499_E6	E6	1	NA	1947.13	1721	0.18	1581.32	1641.82
937	chr1	60724733	60725481	749	sex-indep (robust)	TAD67_chr1	STAT5_sDHS	sex_indep_static (n=64,584)	STAT5_bound	common	651	357	504	0	Enh_196	Enh	enhancer	enhancer	chr1	60649458	60649460	+	nc_inter_c1_254	TAD67_chr1	75274	0.314377	0.222299	0.694718	-1.43943	0.360153	None	none	none	static	dDHS_open	static	static	static	215219_E7	E7	222504_E7	E7	1	NA	902.175	890	0.02	939.078	665.185
938	chr1	60725842	60726862	1021	sex-indep (robust)	TAD67_chr1	STAT5_sDHS	sex_indep_static (n=64,584)	STAT5_bound	common	651	357	504	4	Enh_197	Enh	enhancer	enhancer	chr1	60803231	60803233	+	cd28	TAD67_chr1	76370	0.0327058	0.0292005	0.904179	-1.10598	1	None	none	none	static	static	dDHS_open	dDHS_open	static	215221_E6	E6	222506_E6	E6	1	NA	2160.51	1835	0.24	2369.28	1972.48
939	chr1	60772801	60773032	232	sex-indep (standard)	TAD67_chr1	STAT5_sDHS	sex_indep_static (n=64,584)	not_bound	none	0	0	0	0	WE_440	WE	weak_enhancer	enhancer	chr1	60803231	60803233	+	cd28	TAD67_chr1	30200	0.0327058	0.0292005	0.904179	-1.10598	1	None	none	none	none	none	none	none	none	215229_E10	E10	222519_E5	E5	0	NA	73.743	76	-0.04	151.116	111.505
940	chr1	60791900	60792420	521	sex-indep (robust)	TAD67_chr1	STAT5_sDHS	sex_indep_static (n=64,584)	not_bound	none	0	0	0	0	Insul_87	Insul	insulator	insulator	chr1	60803231	60803233	+	cd28	TAD67_chr1	10812	0.0327058	0.0292005	0.904179	-1.10598	1	None	none	none	dDHS_open	static	static	static	static	215237_E5	E5	222524_E5	E5	1	NA	406.371	435	-0.1	707.007	569.06
941	chr1	60878279	60878802	524	sex-indep (robust)	TAD67_chr1	STAT5_hi_dDHS	sex_indep_dynamic (n=1532)	STAT5_bound	common	196	107	151.5	4	Enh_198	Enh	enhancer	enhancer	chr1	60903699	60903701	-	nc_inter_c1_260	TAD67_chr1	24898	0	0	1	1	1	None	none	none	static	static	dDHS_open	dDHS_open	static	215254_E6	E6	222534_E6	E6	1	110	961.797	479	1.01	404.775	392.19
942	chr1	60879767	60880095	329	sex-indep (robust)	TAD67_chr1	none	sex_indep_static (n=64,584)	not_bound	none	0	0	0	0	Insul_88	Insul	insulator	insulator	chr1	60903699	60903701	-	nc_inter_c1_260	TAD67_chr1	23605	0	0	1	1	1	None	none	none	none	none	none	none	none	215256_E6	E6	222536_E6	E6	1	NA	133.365	133	0	134.925	130.73
943	chr1	60881499	60882053	555	Male (standard)	TAD67_chr1	STAT5_sDHS	male_bias_static (n=1895)	STAT5_bound	male_enriched	274	54	164	4	WE_441	WE	weak_enhancer	enhancer	chr1	60903699	60903701	-	nc_inter_c1_260	TAD67_chr1	21647	0	0	1	1	1	None	none	none	static	static	static	static	static	215259_E6	E6	222538_E6	E6	1	NA	765.672	718	0.09	350.805	438.33
944	chr1	60883708	60884595	888	Male (robust)	TAD67_chr1	STAT5_hi_dDHS	male_bias_dynamic (n=834)	STAT5_bound	common	825	426	625.5	2	Enh_199	Enh	enhancer	enhancer	chr1	60903699	60903701	-	nc_inter_c1_260	TAD67_chr1	19105	0	0	1	1	1	None	none	none	dDHS_close	static	dDHS_open	dDHS_open	dDHS_open	215263_E6	E6	222541_E6	E6	1	1111	2708.09	1119	1.28	642.243	1168.88
945	chr1	60886797	60887008	212	sex-indep (robust)	TAD67_chr1	STAT5_sDHS	sex_indep_static (n=64,584)	not_bound	none	0	0	0	0	WE_442	WE	weak_enhancer	enhancer	chr1	60903699	60903701	-	nc_inter_c1_260	TAD67_chr1	16692	0	0	1	1	1	None	none	none	none	none	none	none	none	215267_E6	E6	222545_E6	E6	1	NA	134.934	123	0.13	102.543	84.59
946	chr1	60903648	60904111	464	Male (standard)	TAD67_chr1	STAT5_hi_dDHS	male_bias_dynamic (n=834)	STAT5_bound	common	367	180	273.5	1	WE_443	WE	weak_enhancer	enhancer	chr1	60903699	60903701	-	nc_inter_c1_260	TAD67_chr1	0	0	0	1	1	1	None	none	none	static	static	dDHS_open	dDHS_open	dDHS_open	215278_E6	E6	222553_E6	E6	1	111	797.052	381	1.06	307.629	565.215
947	chr1	60914501	60914802	302	sex-indep (standard)	TAD67_chr1	STAT5_sDHS	sex_indep_static (n=64,584)	not_bound	none	0	0	0	0	WE_444	WE	weak_enhancer	enhancer	chr1	60925352	60925354	+	nc_inter_c1_262	TAD67_chr1	10551	0.018504	0.0929869	3.86192	3.86192	0.863449	None	none	none	none	none	none	none	none	215282_E5	E5	222560_E5	E5	1	NA	76.881	106	-0.46	151.116	107.66
948	chr1	60917505	60918013	509	sex-indep (robust)	TAD67_chr1	STAT5_sDHS	sex_indep_static (n=64,584)	not_bound	none	0	0	0	0	Enh_200	Enh	enhancer	enhancer	chr1	60925352	60925354	+	nc_inter_c1_262	TAD67_chr1	7340	0.018504	0.0929869	3.86192	3.86192	0.863449	None	none	none	static	none	none	none	none	215284_E6	E6	222565_E6	E6	1	NA	238.488	297	-0.32	334.614	269.15
949	chr1	60919743	60920324	582	sex-indep (robust)	TAD67_chr1	STAT5_sDHS	sex_indep_static (n=64,584)	not_bound	none	0	0	0	2	WE_445	WE	weak_enhancer	enhancer	chr1	60925352	60925354	+	nc_inter_c1_262	TAD67_chr1	5029	0.018504	0.0929869	3.86192	3.86192	0.863449	None	none	none	static	static	static	static	static	215287_E5	E5	222568_E5	E5	1	NA	312.231	301	0.05	420.966	388.345
950	chr1	60922960	60923203	244	sex-indep (robust)	TAD67_chr1	STAT5_sDHS	sex_indep_static (n=64,584)	not_bound	none	0	0	0	0	WE_446	WE	weak_enhancer	enhancer	chr1	60925352	60925354	+	nc_inter_c1_262	TAD67_chr1	2150	0.018504	0.0929869	3.86192	3.86192	0.863449	None	none	none	static	none	none	none	none	215290_E11	E11	222573_E6	E6	0	NA	97.278	102	-0.07	75.558	130.73
951	chr1	61017107	61017699	593	sex-indep (robust)	TAD68_chr1	STAT5_sDHS	sex_indep_static (n=64,584)	not_bound	none	0	0	0	3	Insul_89	Insul	insulator	insulator	chr1	61034757	61034759	+	icos	TAD68_chr1	17059	0.281388	0.243875	0.924433	-1.08174	1	None	none	none	static	static	static	static	static	215302_E5	E5	222593_E5	E5	1	NA	243.195	283	-0.22	388.584	376.81
952	chr1	61409870	61410021	152	sex-indep (standard)	TAD69_chr1	STAT5_sDHS	sex_indep_static (n=64,584)	not_bound	none	0	0	0	0	WE_447	WE	weak_enhancer	enhancer	chr1	61435275	61435277	+	9530026f06rik	TAD69_chr1	25255	0	0	1	1	1	None	none	none	static	none	none	static	none	215326_E2	E2	222624_E2	E2	1	NA	69.036	66	0.06	53.97	103.815
953	chr1	61430139	61431416	1278	sex-indep (robust)	TAD69_chr1	STAT5_sDHS	sex_indep_static (n=64,584)	not_bound	none	0	0	0	3	WE_448	WE	weak_enhancer	enhancer	chr1	61435275	61435277	+	9530026f06rik	TAD69_chr1	3860	0	0	1	1	1	None	none	none	dDHS_open	static	static	static	static	215330_E5	E5	222628_E5	E5	1	NA	873.933	776	0.17	1527.35	1003.54
954	chr1	61433185	61433437	253	sex-indep (standard)	TAD69_chr1	none	sex_indep_static (n=64,584)	not_bound	none	0	0	0	0	Insul_90	Insul	insulator	insulator	chr1	61435275	61435277	+	9530026f06rik	TAD69_chr1	1839	0	0	1	1	1	None	none	none	none	none	none	none	none	215332_E11	E11	222630_E11	E11	1	NA	95.709	93	0.04	151.116	111.505
955	chr1	61474491	61474802	312	sex-indep (standard)	TAD69_chr1	none	sex_indep_static (n=64,584)	not_bound	none	0	0	0	2	WE_449	WE	weak_enhancer	enhancer	chr1	61435276	61435278	+	nc_inter_c1_263	TAD69_chr1	39214	0	0	1	1	1	None	none	none	none	none	none	none	none	215342_E2	E2	222638_E1	E1	0	NA	59.622	52	0.2	134.925	84.59
956	chr1	61685386	61686036	651	sex-indep (standard)	TAD69_chr1	STAT5_sDHS	sex_indep_static (n=64,584)	not_bound	none	0	0	0	0	WP_60	WP	weak_promoter	promoter	chr1	61685397	61685399	+	pard3b	TAD69_chr1	0	0.208908	0.460287	2.29309	2.29309	1.44002e-10	Male	no_response	none	static	none	none	none	none	215358_E7	E7	222659_E7	E7	1	NA	200.832	254	-0.34	318.423	84.59
957	chr1	61696412	61696922	511	Male (robust)	TAD69_chr1	STAT5_sDHS	male_bias_static (n=1895)	not_bound	none	0	0	0	1	WE_450	WE	weak_enhancer	enhancer	chr1	61685397	61685399	+	pard3b	TAD69_chr1	11014	0.208908	0.460287	2.29309	2.29309	1.44002e-10	Male	no_response	none	dDHS_close	none	dDHS_open	static	static	215362_E5	E5	222662_E13	E13	0	NA	1325.81	982	0.43	253.659	96.125
958	chr1	61698362	61698867	506	Male (standard)	TAD69_chr1	none	male_bias_static (n=1895)	not_bound	none	0	0	0	1	WE_451	WE	weak_enhancer	enhancer	chr1	61685397	61685399	+	pard3b	TAD69_chr1	12964	0.208908	0.460287	2.29309	2.29309	1.44002e-10	Male	no_response	none	none	none	none	none	none	215365_E11	E11	222663_E11	E11	1	NA	108.261	129	-0.25	178.101	42.295
959	chr1	61817867	61818066	200	sex-indep (standard)	TAD69_chr1	STAT5_sDHS	sex_indep_static (n=64,584)	not_bound	none	0	0	0	0	Insul_91	Insul	insulator	insulator	chr1	61685397	61685399	+	pard3b	TAD69_chr1	132469	0.208908	0.460287	2.29309	2.29309	1.44002e-10	Male	no_response	none	static	none	none	none	none	215375_E11	E11	222672_E13	E13	0	NA	67.467	76	-0.17	70.161	73.055
960	chr1	61893165	61893551	387	sex-indep (robust)	TAD70_chr1	STAT5_sDHS	sex_indep_static (n=64,584)	not_bound	none	0	0	0	0	WE_452	WE	weak_enhancer	enhancer	chr1	62545941	62545943	-	nc_as_c1_264	TAD70_chr1	652391	0.0450157	0.0876173	1.81472	1.81472	0.880435	None	none	none	static	static	static	static	static	215381_E11	E11	222685_E12	E12	0	NA	389.112	364	0.1	329.217	519.075
961	chr1	62221668	62222232	565	sex-indep (robust)	TAD70_chr1	STAT5_sDHS	sex_indep_static (n=64,584)	not_bound	none	0	0	0	2	WE_453	WE	weak_enhancer	enhancer	chr1	62545941	62545943	-	nc_as_c1_264	TAD70_chr1	323710	0.0450157	0.0876173	1.81472	1.81472	0.880435	None	none	none	dDHS_close	dDHS_close	static	static	static	215429_E6	E6	222711_E6	E6	1	NA	1005.73	921	0.13	680.022	1265.01
962	chr1	62403223	62403440	218	sex-indep (standard)	TAD70_chr1	STAT5_sDHS	sex_indep_static (n=64,584)	not_bound	none	0	0	0	0	Enh_201	Enh	enhancer	enhancer	chr1	62545941	62545943	-	nc_as_c1_264	TAD70_chr1	142502	0.0450157	0.0876173	1.81472	1.81472	0.880435	None	none	none	static	static	none	none	none	215453_E12	E12	222732_E11	E11	0	NA	112.968	120	-0.09	151.116	180.715
963	chr1	62469537	62469917	381	sex-indep (robust)	TAD70_chr1	STAT5_sDHS	sex_indep_static (n=64,584)	not_bound	none	0	0	0	0	WE_454	WE	weak_enhancer	enhancer	chr1	62545941	62545943	-	nc_as_c1_264	TAD70_chr1	76025	0.0450157	0.0876173	1.81472	1.81472	0.880435	None	none	none	static	static	static	static	static	215466_E6	E6	222742_E5	E5	0	NA	357.732	416	-0.22	420.966	619.045
964	chr1	62512136	62512416	281	sex-indep (robust)	TAD70_chr1	STAT5_sDHS	sex_indep_static (n=64,584)	not_bound	none	0	0	0	0	WE_455	WE	weak_enhancer	enhancer	chr1	62545941	62545943	-	nc_as_c1_264	TAD70_chr1	33526	0.0450157	0.0876173	1.81472	1.81472	0.880435	None	none	none	none	none	none	none	none	215475_E6	E6	222750_E8	E8	0	NA	75.312	94	-0.32	145.719	149.955
965	chr1	62512873	62513108	236	sex-indep (standard)	TAD70_chr1	STAT5_sDHS	sex_indep_static (n=64,584)	not_bound	none	0	0	0	0	WE_456	WE	weak_enhancer	enhancer	chr1	62545941	62545943	-	nc_as_c1_264	TAD70_chr1	32834	0.0450157	0.0876173	1.81472	1.81472	0.880435	None	none	none	static	none	none	none	none	215477_E6	E6	222751_E7	E7	0	NA	69.036	134	-0.96	167.307	134.575
966	chr1	62610977	62611165	189	sex-indep (standard)	TAD70_chr1	none	sex_indep_static (n=64,584)	not_bound	none	0	0	0	0	WE_457	WE	weak_enhancer	enhancer	chr1	62545941	62545943	-	nc_as_c1_264	TAD70_chr1	65035	0.0450157	0.0876173	1.81472	1.81472	0.880435	None	none	none	none	none	none	none	none	215500_E10	E10	222771_E13	E13	0	NA	29.811	45	-0.59	118.734	76.9
967	chr1	62613299	62613450	152	sex-indep (standard)	TAD70_chr1	STAT5_sDHS	sex_indep_static (n=64,584)	not_bound	none	0	0	0	0	WE_458	WE	weak_enhancer	enhancer	chr1	62545941	62545943	-	nc_as_c1_264	TAD70_chr1	67357	0.0450157	0.0876173	1.81472	1.81472	0.880435	None	none	none	static	none	none	none	none	215502_E11	E11	222773_E6	E6	0	NA	62.76	119	-0.92	113.337	65.365
968	chr1	62711471	62711932	462	sex-indep (robust)	TAD70_chr1	STAT5_sDHS	sex_indep_static (n=64,584)	not_bound	none	0	0	0	0	WE_459	WE	weak_enhancer	enhancer	chr1	62749890	62749892	+	nrp2	TAD70_chr1	37959	1.61269	0.985174	0.634261	-1.57664	3.16231e-07	Female	class_II	IIA	none	none	none	none	none	215504_E2	E2	222786_E5	E5	0	NA	134.934	111	0.28	161.91	119.195
969	chr1	62747669	62748065	397	sex-indep (robust)	TAD70_chr1	none	sex_indep_static (n=64,584)	not_bound	none	0	0	0	4	Insul_92	Insul	insulator	insulator	chr1	62749890	62749892	+	nrp2	TAD70_chr1	1826	1.61269	0.985174	0.634261	-1.57664	3.16231e-07	Female	class_II	IIA	none	none	none	none	none	215510_E5	E5	222793_E11	E11	0	NA	144.348	186	-0.37	167.307	226.855
970	chr1	62749411	62750366	956	sex-indep (robust)	TAD70_chr1	STAT5_sDHS	sex_indep_static (n=64,584)	not_bound	none	0	0	0	3	WP_61	WP	weak_promoter	promoter	chr1	62749890	62749892	+	nrp2	TAD70_chr1	0	1.61269	0.985174	0.634261	-1.57664	3.16231e-07	Female	class_II	IIA	static	dDHS_open	static	static	static	215512_E7	E7	222795_E7	E7	1	NA	445.596	540	-0.28	620.655	484.47
971	chr1	62752639	62754260	1622	sex-indep (robust)	TAD70_chr1	STAT5_sDHS	sex_indep_static (n=64,584)	STAT5_bound	common	98	77	87.5	3	WP_62	WP	weak_promoter	promoter	chr1	62749890	62749892	+	nrp2	TAD70_chr1	2748	1.61269	0.985174	0.634261	-1.57664	3.16231e-07	Female	class_II	IIA	static	static	static	static	static	215514_E7	E7	222799_E7	E7	1	NA	891.192	797	0.16	809.55	861.28
972	chr1	62766321	62766981	661	sex-indep (robust)	TAD71_chr1	none	sex_indep_static (n=64,584)	not_bound	none	0	0	0	2	WE_460	WE	weak_enhancer	enhancer	chr1	62841304	62841306	-	4930487h11rik	TAD71_chr1	74324	0.0480211	0.00987173	0.263764	-3.79127	0.839239	None	none	none	none	none	none	none	none	215525_E6	E6	222811_E6	E6	1	NA	180.435	168	0.1	280.644	299.91
973	chr1	62767320	62767640	321	sex-indep (standard)	TAD71_chr1	none	sex_indep_static (n=64,584)	not_bound	none	0	0	0	0	WE_461	WE	weak_enhancer	enhancer	chr1	62841304	62841306	-	4930487h11rik	TAD71_chr1	73665	0.0480211	0.00987173	0.263764	-3.79127	0.839239	None	none	none	none	none	none	none	none	215527_E6	E6	222813_E6	E6	1	NA	97.278	112	-0.2	183.498	123.04
975	chr1	62772885	62773132	248	sex-indep (standard)	TAD71_chr1	none	sex_indep_static (n=64,584)	not_bound	none	0	0	0	0	Enh_202	Enh	enhancer	enhancer	chr1	62841304	62841306	-	4930487h11rik	TAD71_chr1	68173	0.0480211	0.00987173	0.263764	-3.79127	0.839239	None	none	none	none	none	none	none	none	215533_E6	E6	222822_E9	E9	0	NA	53.346	50	0.09	86.352	38.45
976	chr1	62776113	62776614	502	sex-indep (standard)	TAD71_chr1	none	sex_indep_static (n=64,584)	not_bound	none	0	0	0	0	WE_462	WE	weak_enhancer	enhancer	chr1	62841304	62841306	-	4930487h11rik	TAD71_chr1	64691	0.0480211	0.00987173	0.263764	-3.79127	0.839239	None	none	none	none	none	none	none	none	215539_E6	E6	222830_E9	E9	0	NA	158.469	155	0.03	307.629	203.785
977	chr1	62776617	62776865	249	sex-indep (standard)	TAD71_chr1	none	sex_indep_static (n=64,584)	not_bound	none	0	0	0	0	Enh_203	Enh	enhancer	enhancer	chr1	62841304	62841306	-	4930487h11rik	TAD71_chr1	64440	0.0480211	0.00987173	0.263764	-3.79127	0.839239	None	none	none	none	none	none	none	none	215540_E9	E9	222830_E9	E9	1	NA	34.518	30	0.2	75.558	49.985
978	chr1	62777157	62777451	295	sex-indep (robust)	TAD71_chr1	none	sex_indep_static (n=64,584)	not_bound	none	0	0	0	0	Enh_204	Enh	enhancer	enhancer	chr1	62841304	62841306	-	4930487h11rik	TAD71_chr1	63854	0.0480211	0.00987173	0.263764	-3.79127	0.839239	None	none	none	none	static	none	none	none	215541_E6	E6	222831_E11	E11	0	NA	177.297	169	0.07	172.704	342.205
979	chr1	62778194	62778547	354	sex-indep (standard)	TAD71_chr1	STAT5_sDHS	sex_indep_static (n=64,584)	STAT5_bound	common	421	136	278.5	2	Enh_205	Enh	enhancer	enhancer	chr1	62841304	62841306	-	4930487h11rik	TAD71_chr1	62758	0.0480211	0.00987173	0.263764	-3.79127	0.839239	None	none	none	none	none	none	static	none	215543_E6	E6	222833_E6	E6	1	NA	186.711	139	0.43	156.513	215.32
980	chr1	62778713	62778957	245	sex-indep (robust)	TAD71_chr1	none	sex_indep_static (n=64,584)	STAT5_bound	common	421	136	278.5	1	Enh_206	Enh	enhancer	enhancer	chr1	62841304	62841306	-	4930487h11rik	TAD71_chr1	62348	0.0480211	0.00987173	0.263764	-3.79127	0.839239	None	none	none	none	none	none	static	none	215543_E6	E6	222833_E6	E6	1	NA	97.278	86	0.18	80.955	146.11
981	chr1	62781105	62781433	329	sex-indep (robust)	TAD71_chr1	STAT5_sDHS	sex_indep_static (n=64,584)	not_bound	none	0	0	0	0	WE_463	WE	weak_enhancer	enhancer	chr1	62841304	62841306	-	4930487h11rik	TAD71_chr1	59872	0.0480211	0.00987173	0.263764	-3.79127	0.839239	None	none	none	static	static	static	none	none	215547_E6	E6	222837_E6	E6	1	NA	186.711	285	-0.61	183.498	422.95
982	chr1	62794244	62794776	533	sex-indep (robust)	TAD71_chr1	STAT5_sDHS	sex_indep_static (n=64,584)	not_bound	none	0	0	0	0	WE_464	WE	weak_enhancer	enhancer	chr1	62841304	62841306	-	4930487h11rik	TAD71_chr1	46529	0.0480211	0.00987173	0.263764	-3.79127	0.839239	None	none	none	static	none	static	static	static	215554_E6	E6	222847_E6	E6	1	NA	194.556	255	-0.39	350.805	338.36
983	chr1	62794910	62795361	452	sex-indep (robust)	TAD71_chr1	STAT5_sDHS	sex_indep_static (n=64,584)	not_bound	none	0	0	0	0	WE_465	WE	weak_enhancer	enhancer	chr1	62841304	62841306	-	4930487h11rik	TAD71_chr1	45944	0.0480211	0.00987173	0.263764	-3.79127	0.839239	None	none	none	static	static	static	static	static	215554_E6	E6	222847_E6	E6	1	NA	365.577	512	-0.49	431.76	984.32
984	chr1	62797094	62797258	165	sex-indep (standard)	TAD71_chr1	STAT5_sDHS	sex_indep_static (n=64,584)	not_bound	none	0	0	0	0	WE_466	WE	weak_enhancer	enhancer	chr1	62841304	62841306	-	4930487h11rik	TAD71_chr1	44047	0.0480211	0.00987173	0.263764	-3.79127	0.839239	None	none	none	static	none	none	none	none	215556_E13	E13	222850_E6	E6	0	NA	67.467	43	0.65	53.97	84.59
985	chr1	62797785	62798485	701	sex-indep (robust)	TAD71_chr1	none	sex_indep_static (n=64,584)	not_bound	none	0	0	0	0	Enh_207	Enh	enhancer	enhancer	chr1	62841304	62841306	-	4930487h11rik	TAD71_chr1	42820	0.0480211	0.00987173	0.263764	-3.79127	0.839239	None	none	none	none	none	none	none	none	215559_E6	E6	222853_E6	E6	1	NA	177.297	259	-0.55	242.865	299.91
986	chr1	62822569	62822832	264	sex-indep (robust)	TAD71_chr1	none	sex_indep_static (n=64,584)	not_bound	none	0	0	0	0	WE_467	WE	weak_enhancer	enhancer	chr1	62841304	62841306	-	4930487h11rik	TAD71_chr1	18473	0.0480211	0.00987173	0.263764	-3.79127	0.839239	None	none	none	none	none	none	none	none	215569_E10	E10	222859_E10	E10	1	NA	54.915	76	-0.47	134.925	99.97
987	chr1	62823797	62824598	802	sex-indep (robust)	TAD71_chr1	STAT5_sDHS	sex_indep_static (n=64,584)	not_bound	none	0	0	0	1	Enh_208	Enh	enhancer	enhancer	chr1	62841304	62841306	-	4930487h11rik	TAD71_chr1	16707	0.0480211	0.00987173	0.263764	-3.79127	0.839239	None	none	none	static	none	static	static	static	215572_E6	E6	222861_E6	E6	1	NA	273.006	310	-0.18	377.79	338.36
988	chr1	62829852	62830228	377	sex-indep (robust)	TAD71_chr1	STAT5_sDHS	sex_indep_static (n=64,584)	not_bound	none	0	0	0	0	Insul_93	Insul	insulator	insulator	chr1	62841304	62841306	-	4930487h11rik	TAD71_chr1	11077	0.0480211	0.00987173	0.263764	-3.79127	0.839239	None	none	none	none	none	none	none	none	215578_E11	E11	222865_E5	E5	0	NA	106.692	107	0	124.131	92.28
989	chr1	62842270	62842557	288	sex-indep (robust)	TAD71_chr1	STAT5_sDHS	sex_indep_static (n=64,584)	not_bound	none	0	0	0	0	Insul_94	Insul	insulator	insulator	chr1	62842239	62842241	-	nc_as_c1_265	TAD71_chr1	30	0	0	1	1	1	None	none	none	static	none	none	none	none	215581_E12	E12	222868_E8	E8	0	NA	73.743	103	-0.48	124.131	80.745
990	chr1	62842916	62843070	155	sex-indep (standard)	TAD71_chr1	none	sex_indep_static (n=64,584)	not_bound	none	0	0	0	0	Insul_95	Insul	insulator	insulator	chr1	62842239	62842241	-	nc_as_c1_265	TAD71_chr1	676	0	0	1	1	1	None	none	none	none	none	none	none	none	215582_E2	E2	222869_E11	E11	0	NA	25.104	27	-0.11	43.176	19.225
991	chr1	62856136	62856783	648	sex-indep (robust)	TAD71_chr1	STAT5_sDHS	sex_indep_static (n=64,584)	STAT5_bound	common	83	70	76.5	0	Enh_209	Enh	enhancer	enhancer	chr1	62842239	62842241	-	nc_as_c1_265	TAD71_chr1	13896	0	0	1	1	1	None	none	none	static	dDHS_close	static	static	static	215585_E6	E6	222877_E6	E6	1	NA	1110.85	1242	-0.16	777.168	1626.43
992	chr1	62857816	62858034	219	sex-indep (standard)	TAD71_chr1	none	sex_indep_static (n=64,584)	not_bound	none	0	0	0	0	WE_468	WE	weak_enhancer	enhancer	chr1	62842239	62842241	-	nc_as_c1_265	TAD71_chr1	15576	0	0	1	1	1	None	none	none	none	none	none	none	none	215587_E6	E6	222879_E6	E6	1	NA	45.501	51	-0.16	37.779	80.745
993	chr1	62868146	62868837	692	sex-indep (robust)	TAD71_chr1	none	sex_indep_static (n=64,584)	not_bound	none	0	0	0	0	WE_469	WE	weak_enhancer	enhancer	chr1	62880786	62880788	-	nc_inter_c1_266	TAD71_chr1	11950	0.0886943	0	0.111322	-8.98298	0.997628	None	none	none	none	none	none	none	none	215595_E5	E5	222885_E5	E5	1	NA	174.159	194	-0.16	350.805	288.375
994	chr1	62869617	62870880	1264	sex-indep (robust)	TAD71_chr1	STAT5_sDHS	sex_indep_static (n=64,584)	STAT5_bound	common	272	359	315.5	4	Enh_210	Enh	enhancer	enhancer	chr1	62880786	62880788	-	nc_inter_c1_266	TAD71_chr1	9907	0.0886943	0	0.111322	-8.98298	0.997628	None	none	none	static	static	dDHS_open	dDHS_open	dDHS_open	215598_E6	E6	222888_E6	E6	1	NA	1757.28	1627	0.11	1586.72	3002.95
995	chr1	62873836	62874289	454	sex-indep (robust)	TAD71_chr1	STAT5_sDHS	sex_indep_static (n=64,584)	not_bound	none	0	0	0	0	WE_470	WE	weak_enhancer	enhancer	chr1	62880786	62880788	-	nc_inter_c1_266	TAD71_chr1	6498	0.0886943	0	0.111322	-8.98298	0.997628	None	none	none	none	none	none	none	none	215602_E6	E6	222892_E6	E6	1	NA	207.108	257	-0.31	264.453	246.08
996	chr1	62874527	62874799	273	sex-indep (standard)	TAD71_chr1	none	sex_indep_static (n=64,584)	not_bound	none	0	0	0	0	WE_471	WE	weak_enhancer	enhancer	chr1	62880786	62880788	-	nc_inter_c1_266	TAD71_chr1	5988	0.0886943	0	0.111322	-8.98298	0.997628	None	none	none	none	none	none	none	none	215604_E12	E12	222892_E6	E6	0	NA	45.501	65	-0.51	70.161	73.055
997	chr1	62946003	62946260	258	sex-indep (standard)	TAD71_chr1	STAT5_hi_dDHS	sex_indep_dynamic (n=1532)	STAT5_bound	male_enriched	180	36	108	2	WE_472	WE	weak_enhancer	enhancer	chr1	62880786	62880788	-	nc_inter_c1_266	TAD71_chr1	65216	0.0886943	0	0.111322	-8.98298	0.997628	None	none	none	dDHS_close	static	dDHS_open	dDHS_open	none	215611_E12	E12	222901_E11	E11	0	1110	338.904	72	2.23	102.543	176.87
998	chr1	62976191	62976384	194	sex-indep (standard)	TAD71_chr1	STAT5_sDHS	sex_indep_static (n=64,584)	not_bound	none	0	0	0	0	Insul_96	Insul	insulator	insulator	chr1	62880786	62880788	-	nc_inter_c1_266	TAD71_chr1	95404	0.0886943	0	0.111322	-8.98298	0.997628	None	none	none	static	none	none	none	none	215614_E1	E1	222906_E12	E12	0	NA	45.501	77	-0.76	75.558	38.45
999	chr1	63032994	63033221	228	sex-indep (standard)	TAD71_chr1	none	sex_indep_static (n=64,584)	not_bound	none	0	0	0	0	Insul_97	Insul	insulator	insulator	chr1	63160839	63160841	-	ino80d	TAD71_chr1	127619	0.956309	0.861901	0.939197	-1.06474	1	None	none	none	none	none	none	none	none	215621_E2	E2	222918_E12	E12	0	NA	61.191	51	0.26	75.558	46.14
1001	chr1	63170337	63171249	913	sex-indep (robust)	TAD71_chr1	STAT5_sDHS	sex_indep_static (n=64,584)	STAT5_bound	common	350	210	280	2	WE_473	WE	weak_enhancer	enhancer	chr1	63161313	63161315	+	ino80dos	TAD71_chr1	9023	0.30008	0.222057	0.752824	-1.32833	0.828481	None	none	none	static	dDHS_open	static	static	static	215652_E6	E6	222957_E6	E6	1	NA	1115.56	1225	-0.14	1683.86	1068.91
1002	chr1	63176393	63177067	675	sex-indep (robust)	TAD71_chr1	STAT5_sDHS	sex_indep_static (n=64,584)	not_bound	none	0	0	0	0	WE_474	WE	weak_enhancer	enhancer	chr1	63161313	63161315	+	ino80dos	TAD71_chr1	15079	0.30008	0.222057	0.752824	-1.32833	0.828481	None	none	none	static	static	static	static	static	215661_E7	E7	222963_E8	E8	0	NA	331.059	383	-0.21	399.378	192.25
1003	chr1	63185145	63185562	418	sex-indep (robust)	TAD71_chr1	STAT5_sDHS	sex_indep_static (n=64,584)	STAT5_bound	common	179	83	131	2	WE_475	WE	weak_enhancer	enhancer	chr1	63161313	63161315	+	ino80dos	TAD71_chr1	23831	0.30008	0.222057	0.752824	-1.32833	0.828481	None	none	none	static	none	none	none	none	215670_E6	E6	222967_E11	E11	0	NA	177.297	173	0.04	113.337	126.885
1005	chr1	63227639	63227949	311	sex-indep (robust)	TAD71_chr1	none	sex_indep_static (n=64,584)	not_bound	none	0	0	0	0	Insul_98	Insul	insulator	insulator	chr1	63225596	63225598	+	snora41	TAD71_chr1	2042	1.91276	1.42106	0.763695	-1.30942	1	None	none	none	none	none	none	none	none	215685_E5	E5	222978_E5	E5	1	NA	197.694	224	-0.18	188.895	315.29
1006	chr1	63228877	63229157	281	sex-indep (robust)	TAD71_chr1	STAT5_sDHS	sex_indep_static (n=64,584)	not_bound	none	0	0	0	0	Insul_99	Insul	insulator	insulator	chr1	63225596	63225598	+	snora41	TAD71_chr1	3280	1.91276	1.42106	0.763695	-1.30942	1	None	none	none	static	static	none	none	none	215685_E5	E5	222980_E5	E5	1	NA	163.176	130	0.33	140.322	269.15
1007	chr1	63477207	63477613	407	sex-indep (robust)	TAD72_chr1	STAT5_sDHS	sex_indep_static (n=64,584)	not_bound	none	0	0	0	0	WE_476	WE	weak_enhancer	enhancer	chr1	63492477	63492479	+	adam23	TAD72_chr1	14865	1.62068	1.69917	1.09043	1.09043	0.884818	sex_indep	none	none	static	static	static	static	static	215723_E5	E5	223039_E5	E5	1	NA	269.868	230	0.23	345.408	311.445
1008	chr1	63480708	63481072	365	sex-indep (standard)	TAD72_chr1	STAT5_sDHS	sex_indep_static (n=64,584)	not_bound	none	0	0	0	2	WE_477	WE	weak_enhancer	enhancer	chr1	63492477	63492479	+	adam23	TAD72_chr1	11406	1.62068	1.69917	1.09043	1.09043	0.884818	sex_indep	none	none	static	none	static	none	none	215727_E5	E5	223042_E5	E5	1	NA	252.609	139	0.86	183.498	230.7
1009	chr1	63484199	63484508	310	sex-indep (robust)	TAD72_chr1	none	sex_indep_static (n=64,584)	not_bound	none	0	0	0	2	WE_478	WE	weak_enhancer	enhancer	chr1	63492477	63492479	+	adam23	TAD72_chr1	7970	1.62068	1.69917	1.09043	1.09043	0.884818	sex_indep	none	none	none	none	none	none	none	215730_E5	E5	223045_E10	E10	0	NA	59.622	65	-0.12	113.337	80.745
1010	chr1	63492272	63492568	297	sex-indep (robust)	TAD72_chr1	none	sex_indep_static (n=64,584)	not_bound	none	0	0	0	0	WE_479	WE	weak_enhancer	enhancer	chr1	63492477	63492479	+	adam23	TAD72_chr1	0	1.62068	1.69917	1.09043	1.09043	0.884818	sex_indep	none	none	none	none	none	none	none	215735_E5	E5	223048_E1	E1	0	NA	54.915	39	0.49	102.543	30.76
1011	chr1	63525503	63525880	378	sex-indep (robust)	TAD72_chr1	STAT5_sDHS	sex_indep_static (n=64,584)	not_bound	none	0	0	0	0	WE_480	WE	weak_enhancer	enhancer	chr1	63492477	63492479	+	adam23	TAD72_chr1	33025	1.62068	1.69917	1.09043	1.09043	0.884818	sex_indep	none	none	static	none	none	none	none	215739_E12	E12	223058_E12	E12	1	NA	114.537	96	0.25	188.895	138.42
1012	chr1	63776683	63777449	767	sex-indep (robust)	TAD73_chr1	STAT5_sDHS	sex_indep_static (n=64,584)	not_bound	none	0	0	0	4	Prom_138	Prom	promoter	promoter	chr1	63776890	63776892	-	mdh1b	TAD73_chr1	0	0.0119677	0.0137121	1.03105	1.03105	1	None	none	none	static	static	static	static	static	215760_E7	E7	223081_E7	E7	1	NA	1391.7	1482	-0.09	1165.75	1207.33
1013	chr1	64065316	64065644	329	sex-indep (robust)	TAD73_chr1	STAT5_sDHS	sex_indep_static (n=64,584)	not_bound	none	0	0	0	4	WE_481	WE	weak_enhancer	enhancer	chr1	64089073	64089075	-	mir6899	TAD73_chr1	23430	0	0	1	1	1	None	none	none	static	static	static	static	static	215779_E11	E11	223106_E6	E6	0	NA	160.038	156	0.04	307.629	199.94
1014	chr1	64081712	64082021	310	sex-indep (robust)	TAD73_chr1	STAT5_sDHS	sex_indep_static (n=64,584)	not_bound	none	0	0	0	0	WE_482	WE	weak_enhancer	enhancer	chr1	64089073	64089075	-	mir6899	TAD73_chr1	7053	0	0	1	1	1	None	none	none	none	none	none	none	none	215784_E11	E11	223116_E11	E11	1	NA	105.123	88	0.26	134.925	103.815
1015	chr1	64087367	64088024	658	sex-indep (robust)	TAD73_chr1	STAT5_sDHS	sex_indep_static (n=64,584)	not_bound	none	0	0	0	0	WE_483	WE	weak_enhancer	enhancer	chr1	64089073	64089075	-	mir6899	TAD73_chr1	1050	0	0	1	1	1	None	none	none	static	static	static	static	static	215787_E5	E5	223119_E5	E5	1	NA	525.615	489	0.1	841.932	557.525
1016	chr1	64144203	64144462	260	sex-indep (robust)	TAD73_chr1	none	sex_indep_static (n=64,584)	not_bound	none	0	0	0	0	WE_484	WE	weak_enhancer	enhancer	chr1	64167961	64167963	-	klf7	TAD73_chr1	23500	0.493569	0.567048	1.21156	1.21156	1	None	none	none	none	none	none	none	none	215801_E10	E10	223132_E11	E11	0	NA	95.709	85	0.17	145.719	92.28
1017	chr1	64166450	64166758	309	sex-indep (robust)	TAD73_chr1	none	sex_indep_static (n=64,584)	not_bound	none	0	0	0	0	WP_63	WP	weak_promoter	promoter	chr1	64167961	64167963	-	klf7	TAD73_chr1	1204	0.493569	0.567048	1.21156	1.21156	1	None	none	none	none	none	none	none	none	215823_E7	E7	223149_E7	E7	1	NA	144.348	120	0.27	107.94	126.885
1018	chr1	64167079	64167254	176	sex-indep (standard)	TAD73_chr1	none	sex_indep_static (n=64,584)	not_bound	none	0	0	0	0	Prom_139	Prom	promoter	promoter	chr1	64167961	64167963	-	klf7	TAD73_chr1	708	0.493569	0.567048	1.21156	1.21156	1	None	none	none	none	none	none	none	none	215824_E8	E8	223150_E8	E8	1	NA	47.07	64	-0.44	113.337	34.605
1019	chr1	64167467	64169328	1862	sex-indep (robust)	TAD73_chr1	STAT5_sDHS	sex_indep_static (n=64,584)	not_bound	none	0	0	0	2	Prom_140	Prom	promoter	promoter	chr1	64167961	64167963	-	klf7	TAD73_chr1	0	0.493569	0.567048	1.21156	1.21156	1	None	none	none	static	static	static	static	static	215827_E7	E7	223151_E7	E7	1	NA	4504.6	5164	-0.2	4296.01	3433.59
1020	chr1	64272707	64272898	192	sex-indep (standard)	TAD73_chr1	none	sex_indep_static (n=64,584)	not_bound	none	0	0	0	0	WE_485	WE	weak_enhancer	enhancer	chr1	64167961	64167963	-	klf7	TAD73_chr1	104745	0.493569	0.567048	1.21156	1.21156	1	None	none	none	none	none	none	none	none	215841_E12	E12	223169_E12	E12	1	NA	50.208	37	0.44	64.764	26.915
1021	chr1	64348036	64348675	640	sex-indep (standard)	TAD73_chr1	STAT5_sDHS	sex_indep_static (n=64,584)	not_bound	none	0	0	0	2	Insul_100	Insul	insulator	insulator	chr1	64167961	64167963	-	klf7	TAD73_chr1	180074	0.493569	0.567048	1.21156	1.21156	1	None	none	none	static	static	static	static	static	215848_E5	E5	223183_E5	E5	1	NA	519.339	396	0.39	388.584	519.075
1022	chr1	64349388	64349621	234	sex-indep (robust)	TAD73_chr1	STAT5_sDHS	sex_indep_static (n=64,584)	not_bound	none	0	0	0	0	Insul_101	Insul	insulator	insulator	chr1	64167961	64167963	-	klf7	TAD73_chr1	181426	0.493569	0.567048	1.21156	1.21156	1	None	none	none	none	none	none	none	none	215850_E5	E5	223185_E7	E7	0	NA	178.866	184	-0.04	199.689	103.815
1023	chr1	64351905	64352592	688	sex-indep (robust)	TAD73_chr1	STAT5_sDHS	sex_indep_static (n=64,584)	not_bound	none	0	0	0	2	WE_486	WE	weak_enhancer	enhancer	chr1	64167961	64167963	-	klf7	TAD73_chr1	183943	0.493569	0.567048	1.21156	1.21156	1	None	none	none	dDHS_open	static	static	static	static	215854_E5	E5	223189_E5	E5	1	NA	561.702	527	0.09	858.123	672.875
1024	chr1	64354745	64354875	131	sex-indep (standard)	TAD73_chr1	none	sex_indep_static (n=64,584)	not_bound	none	0	0	0	2	WE_487	WE	weak_enhancer	enhancer	chr1	64167961	64167963	-	klf7	TAD73_chr1	186783	0.493569	0.567048	1.21156	1.21156	1	None	none	none	none	none	none	none	none	215856_E5	E5	223192_E5	E5	1	NA	39.225	32	0.29	80.955	30.76
1025	chr1	64420911	64421658	748	sex-indep (robust)	TAD73_chr1	STAT5_sDHS	sex_indep_static (n=64,584)	not_bound	none	0	0	0	1	WE_488	WE	weak_enhancer	enhancer	chr1	64167961	64167963	-	klf7	TAD73_chr1	252949	0.493569	0.567048	1.21156	1.21156	1	None	none	none	static	static	static	static	static	215869_E6	E6	223204_E5	E5	0	NA	514.632	518	-0.01	787.962	649.805
1026	chr1	64492720	64492908	189	sex-indep (standard)	TAD73_chr1	none	sex_indep_static (n=64,584)	not_bound	none	0	0	0	0	Insul_102	Insul	insulator	insulator	chr1	64167961	64167963	-	klf7	TAD73_chr1	324758	0.493569	0.567048	1.21156	1.21156	1	None	none	none	none	none	none	none	none	215876_E1	E1	223220_E12	E12	0	NA	32.949	29	0.18	26.985	15.38
1027	chr1	64578556	64579883	1328	sex-indep (robust)	TAD74_chr1	STAT5_sDHS	sex_indep_static (n=64,584)	not_bound	none	0	0	0	2	Prom_141	Prom	promoter	promoter	chr1	64579377	64579379	+	creb1	TAD74_chr1	0	1.3195	1.16486	0.920385	-1.0865	0.872304	sex_indep	none	none	static	static	static	static	static	215884_E7	E7	223229_E7	E7	1	NA	2637.49	2837	-0.11	2914.38	1780.23
1028	chr1	64580087	64580267	181	sex-indep (robust)	TAD74_chr1	none	sex_indep_static (n=64,584)	not_bound	none	0	0	0	0	Prom_142	Prom	promoter	promoter	chr1	64579377	64579379	+	creb1	TAD74_chr1	709	1.3195	1.16486	0.920385	-1.0865	0.872304	sex_indep	none	none	none	none	none	none	none	215884_E7	E7	223229_E7	E7	1	NA	109.83	134	-0.29	178.101	49.985
1029	chr1	64663325	64664519	1195	sex-indep (robust)	TAD74_chr1	STAT5_sDHS	sex_indep_static (n=64,584)	STAT5_bound	common	132	163	147.5	4	Prom_143	Prom	promoter	promoter	chr1	64663740	64663742	-	mettl21a	TAD74_chr1	0	1.88328	1.68249	0.935715	-1.0687	1	sex_indep	none	none	static	static	static	static	static	215913_E7	E7	223254_E7	E7	1	NA	1145.37	1193	-0.06	1122.58	745.93
1030	chr1	64736433	64736800	368	sex-indep (robust)	TAD74_chr1	none	sex_indep_static (n=64,584)	not_bound	none	0	0	0	0	Prom_144	Prom	promoter	promoter	chr1	64737231	64737233	-	2810408i11rik	TAD74_chr1	432	0.361648	0.808017	2.31855	2.31855	0.0151766	Male	no_response	none	none	none	none	none	none	215927_E7	E7	223266_E8	E8	0	NA	185.142	192	-0.05	194.292	134.575
1031	chr1	64736949	64738160	1212	sex-indep (robust)	TAD74_chr1	STAT5_sDHS	sex_indep_static (n=64,584)	not_bound	none	0	0	0	0	Prom_145	Prom	promoter	promoter	chr1	64737231	64737233	-	2810408i11rik	TAD74_chr1	0	0.361648	0.808017	2.31855	2.31855	0.0151766	Male	no_response	none	static	static	static	static	static	215929_E7	E7	223268_E5	E5	0	NA	1766.69	1864	-0.08	1867.36	1561.07
1032	chr1	64764192	64764309	118	sex-indep (standard)	TAD75_chr1	none	sex_indep_static (n=64,584)	not_bound	none	0	0	0	0	Insul_103	Insul	insulator	insulator	chr1	64784322	64784324	-	fzd5	TAD75_chr1	20014	0.636603	0.851654	1.40037	1.40037	0.00853751	None	none	none	none	none	none	none	none	215941_E5	E5	223276_E13	E13	0	NA	39.225	38	0.05	48.573	49.985
1033	chr1	64781398	64781915	518	sex-indep (standard)	TAD75_chr1	none	sex_indep_static (n=64,584)	not_bound	none	0	0	0	0	Enh_211	Enh	enhancer	enhancer	chr1	64784322	64784324	-	fzd5	TAD75_chr1	2408	0.636603	0.851654	1.40037	1.40037	0.00853751	None	none	none	none	none	none	none	none	215948_E11	E11	223285_E11	E11	1	NA	83.157	98	-0.24	156.513	99.97
1034	chr1	64781981	64783211	1231	sex-indep (robust)	TAD75_chr1	none	sex_indep_static (n=64,584)	not_bound	none	0	0	0	2	WP_64	WP	weak_promoter	promoter	chr1	64784322	64784324	-	fzd5	TAD75_chr1	1112	0.636603	0.851654	1.40037	1.40037	0.00853751	None	none	none	none	none	none	none	none	215949_E6	E6	223287_E7	E7	0	NA	470.7	538	-0.19	593.67	330.67
1036	chr1	64789087	64789831	745	sex-indep (robust)	TAD75_chr1	STAT5_sDHS	sex_indep_static (n=64,584)	not_bound	none	0	0	0	0	Enh_212	Enh	enhancer	enhancer	chr1	64784322	64784324	-	fzd5	TAD75_chr1	4764	0.636603	0.851654	1.40037	1.40037	0.00853751	None	none	none	static	static	static	static	dDHS_open	215960_E6	E6	223298_E7	E7	0	NA	903.744	1249	-0.47	960.666	980.475
1037	chr1	64799715	64800006	292	sex-indep (robust)	TAD75_chr1	STAT5_sDHS	sex_indep_static (n=64,584)	not_bound	none	0	0	0	0	WE_489	WE	weak_enhancer	enhancer	chr1	64784322	64784324	-	fzd5	TAD75_chr1	15392	0.636603	0.851654	1.40037	1.40037	0.00853751	None	none	none	static	static	static	dDHS_close	static	215965_E6	E6	223305_E6	E6	1	NA	247.902	288	-0.22	334.614	215.32
1038	chr1	64800282	64800576	295	sex-indep (robust)	TAD75_chr1	STAT5_sDHS	sex_indep_static (n=64,584)	not_bound	none	0	0	0	0	Enh_213	Enh	enhancer	enhancer	chr1	64784322	64784324	-	fzd5	TAD75_chr1	15959	0.636603	0.851654	1.40037	1.40037	0.00853751	None	none	none	static	none	none	none	none	215967_E6	E6	223307_E6	E6	1	NA	203.97	218	-0.1	248.262	169.18
1039	chr1	64801130	64801612	483	sex-indep (robust)	TAD75_chr1	STAT5_sDHS	sex_indep_static (n=64,584)	not_bound	none	0	0	0	0	Enh_214	Enh	enhancer	enhancer	chr1	64784322	64784324	-	fzd5	TAD75_chr1	16807	0.636603	0.851654	1.40037	1.40037	0.00853751	None	none	none	static	static	static	static	static	215969_E6	E6	223309_E6	E6	1	NA	418.923	518	-0.31	431.76	519.075
1040	chr1	64802625	64803427	803	sex-indep (robust)	TAD75_chr1	STAT5_sDHS	sex_indep_static (n=64,584)	not_bound	none	0	0	0	0	Enh_215	Enh	enhancer	enhancer	chr1	64784322	64784324	-	fzd5	TAD75_chr1	18302	0.636603	0.851654	1.40037	1.40037	0.00853751	None	none	none	static	none	none	none	static	215971_E6	E6	223311_E6	E6	1	NA	357.732	510	-0.51	469.539	484.47
1041	chr1	64803885	64804270	386	sex-indep (robust)	TAD75_chr1	STAT5_sDHS	sex_indep_static (n=64,584)	not_bound	none	0	0	0	0	WE_490	WE	weak_enhancer	enhancer	chr1	64784322	64784324	-	fzd5	TAD75_chr1	19562	0.636603	0.851654	1.40037	1.40037	0.00853751	None	none	none	none	none	none	none	none	215974_E6	E6	223313_E6	E6	1	NA	163.176	224	-0.46	205.086	138.42
1042	chr1	64834059	64834948	890	sex-indep (robust)	TAD75_chr1	STAT5_sDHS	sex_indep_static (n=64,584)	not_bound	none	0	0	0	1	WE_491	WE	weak_enhancer	enhancer	chr1	64784322	64784324	-	fzd5	TAD75_chr1	49736	0.636603	0.851654	1.40037	1.40037	0.00853751	None	none	none	dDHS_open	static	static	static	static	215979_E6	E6	223320_E6	E6	1	NA	798.621	1051	-0.4	1144.16	1053.53
1043	chr1	64837981	64838208	228	sex-indep (robust)	TAD75_chr1	none	sex_indep_static (n=64,584)	not_bound	none	0	0	0	0	Enh_216	Enh	enhancer	enhancer	chr1	64784322	64784324	-	fzd5	TAD75_chr1	53658	0.636603	0.851654	1.40037	1.40037	0.00853751	None	none	none	none	none	none	none	none	215984_E6	E6	223324_E11	E11	0	NA	83.157	83	0	86.352	57.675
1044	chr1	64839000	64840076	1077	sex-indep (robust)	TAD75_chr1	STAT5_sDHS	sex_indep_static (n=64,584)	not_bound	none	0	0	0	0	Enh_217	Enh	enhancer	enhancer	chr1	64784322	64784324	-	fzd5	TAD75_chr1	54677	0.636603	0.851654	1.40037	1.40037	0.00853751	None	none	none	static	static	static	static	static	215986_E6	E6	223326_E6	E6	1	NA	647.997	834	-0.36	760.977	569.06
1045	chr1	64841875	64842237	363	sex-indep (robust)	TAD75_chr1	STAT5_sDHS	sex_indep_static (n=64,584)	not_bound	none	0	0	0	0	Enh_218	Enh	enhancer	enhancer	chr1	64784322	64784324	-	fzd5	TAD75_chr1	57552	0.636603	0.851654	1.40037	1.40037	0.00853751	None	none	none	static	static	static	static	static	215988_E6	E6	223330_E6	E6	1	NA	276.144	338	-0.29	415.569	438.33
1046	chr1	64855766	64856043	278	sex-indep (standard)	TAD75_chr1	STAT5_sDHS	sex_indep_static (n=64,584)	STAT5_bound	common	156	91	123.5	2	WE_492	WE	weak_enhancer	enhancer	chr1	64784322	64784324	-	fzd5	TAD75_chr1	71443	0.636603	0.851654	1.40037	1.40037	0.00853751	None	none	none	static	none	none	none	none	215992_E11	E11	223335_E11	E11	1	NA	156.9	69	1.19	80.955	134.575
1047	chr1	65056820	65056984	165	sex-indep (standard)	TAD75_chr1	STAT5_sDHS	sex_indep_static (n=64,584)	not_bound	none	0	0	0	0	Insul_104	Insul	insulator	insulator	chr1	65003396	65003398	-	plekhm3	TAD75_chr1	53423	0.204847	0.157617	0.790887	-1.2644	0.625642	None	none	none	none	none	none	none	none	216026_E12	E12	223373_E2	E2	0	NA	45.501	56	-0.3	97.146	49.985
1048	chr1	65137013	65137325	313	sex-indep (robust)	TAD76_chr1	STAT5_sDHS	sex_indep_static (n=64,584)	not_bound	none	0	0	0	0	WE_493	WE	weak_enhancer	enhancer	chr1	65128862	65128864	-	crygb	TAD76_chr1	8150	0	0	1	1	1	None	none	none	static	static	static	static	static	216033_E6	E6	223384_E11	E11	0	NA	230.643	206	0.16	188.895	284.53
1049	chr1	65151099	65151877	779	sex-indep (robust)	TAD76_chr1	STAT5_sDHS	sex_indep_static (n=64,584)	STAT5_bound	common	134	116	125	0	WE_494	WE	weak_enhancer	enhancer	chr1	65149935	65149937	-	cryga	TAD76_chr1	1163	0	0	1	1	1	None	none	none	static	dDHS_close	none	none	none	216038_E5	E5	223389_E5	E5	1	NA	702.912	550	0.35	259.056	1145.81
1050	chr1	65158687	65158925	239	sex-indep (robust)	TAD76_chr1	STAT5_sDHS	sex_indep_static (n=64,584)	STAT5_bound	common	106	74	90	2	Insul_105	Insul	insulator	insulator	chr1	65149935	65149937	-	cryga	TAD76_chr1	8751	0	0	1	1	1	None	none	none	static	static	static	none	none	216042_E7	E7	223391_E10	E10	0	NA	189.849	215	-0.18	188.895	223.01
1051	chr1	65159183	65159965	783	sex-indep (robust)	TAD76_chr1	STAT5_sDHS	sex_indep_static (n=64,584)	STAT5_bound	common	106	74	90	1	Insul_106	Insul	insulator	insulator	chr1	65149935	65149937	-	cryga	TAD76_chr1	9247	0	0	1	1	1	None	none	none	static	static	static	static	dDHS_open	216044_E7	E7	223393_E7	E7	1	NA	425.199	507	-0.25	442.554	426.795
1052	chr1	65165148	65165507	360	sex-indep (robust)	TAD76_chr1	STAT5_sDHS	sex_indep_static (n=64,584)	not_bound	none	0	0	0	0	WE_495	WE	weak_enhancer	enhancer	chr1	65169786	65169788	-	d630023f18rik	TAD76_chr1	4280	0.00654096	0.0135689	1.88611	1.88611	1	None	none	none	static	none	none	none	none	216051_E6	E6	223400_E9	E9	0	NA	116.106	154	-0.41	134.925	153.8
1053	chr1	65201387	65201863	477	sex-indep (robust)	TAD76_chr1	STAT5_sDHS	sex_indep_static (n=64,584)	not_bound	none	0	0	0	2	Enh_219	Enh	enhancer	enhancer	chr1	65225714	65225716	-	idh1	TAD76_chr1	23852	99.0753	93.7789	0.98232	-1.018	1	sex_indep	none	none	static	static	static	static	static	216056_E6	E6	223407_E5	E5	0	NA	481.683	526	-0.13	431.76	615.2
1054	chr1	65202902	65203278	377	sex-indep (standard)	TAD76_chr1	none	sex_indep_static (n=64,584)	not_bound	none	0	0	0	0	Enh_220	Enh	enhancer	enhancer	chr1	65225714	65225716	-	idh1	TAD76_chr1	22437	99.0753	93.7789	0.98232	-1.018	1	sex_indep	none	none	none	none	none	none	none	216058_E6	E6	223411_E9	E9	0	NA	76.881	125	-0.7	118.734	107.66
1055	chr1	65215956	65216776	821	sex-indep (robust)	TAD76_chr1	STAT5_sDHS	sex_indep_static (n=64,584)	not_bound	none	0	0	0	1	Enh_221	Enh	enhancer	enhancer	chr1	65225714	65225716	-	idh1	TAD76_chr1	8939	99.0753	93.7789	0.98232	-1.018	1	sex_indep	none	none	static	none	none	none	none	216064_E6	E6	223416_E9	E9	0	NA	346.749	368	-0.09	248.262	346.05
1056	chr1	65220339	65220693	355	sex-indep (robust)	TAD76_chr1	none	sex_indep_static (n=64,584)	not_bound	none	0	0	0	2	Enh_222	Enh	enhancer	enhancer	chr1	65225714	65225716	-	idh1	TAD76_chr1	5022	99.0753	93.7789	0.98232	-1.018	1	sex_indep	none	none	none	none	none	none	none	216068_E6	E6	223419_E11	E11	0	NA	225.936	270	-0.26	183.498	372.965
1057	chr1	65222929	65223178	250	sex-indep (standard)	TAD76_chr1	none	sex_indep_static (n=64,584)	not_bound	none	0	0	0	0	WP_65	WP	weak_promoter	promoter	chr1	65225714	65225716	-	idh1	TAD76_chr1	2537	99.0753	93.7789	0.98232	-1.018	1	sex_indep	none	none	none	none	none	none	none	216072_E8	E8	223423_E8	E8	1	NA	86.295	98	-0.18	178.101	80.745
1058	chr1	65223486	65223795	310	sex-indep (standard)	TAD76_chr1	none	sex_indep_static (n=64,584)	not_bound	none	0	0	0	3	Prom_146	Prom	promoter	promoter	chr1	65225714	65225716	-	idh1	TAD76_chr1	1920	99.0753	93.7789	0.98232	-1.018	1	sex_indep	none	none	none	none	none	none	none	216073_E7	E7	223424_E7	E7	1	NA	291.834	302	-0.05	361.599	276.84
1060	chr1	65232702	65233711	1010	sex-indep (robust)	TAD76_chr1	STAT5_sDHS	sex_indep_static (n=64,584)	not_bound	none	0	0	0	0	Prom_147	Prom	promoter	promoter	chr1	65233051	65233053	-	idh1	TAD76_chr1	0	99.0753	93.7789	0.98232	-1.018	1	sex_indep	none	none	static	static	static	static	static	216083_E7	E7	223438_E7	E7	1	NA	2028.72	2138	-0.08	1948.32	2130.13
1061	chr1	65359547	65359797	251	sex-indep (robust)	TAD77_chr1	STAT5_sDHS	sex_indep_static (n=64,584)	not_bound	none	0	0	0	0	Enh_223	Enh	enhancer	enhancer	chr1	65357830	65357832	+	pth2r	TAD77_chr1	1716	0.00848252	0.0170273	2.29312	2.29312	1	None	none	none	static	static	none	none	none	216107_E5	E5	223459_E10	E10	0	NA	160.038	148	0.11	156.513	176.87
1062	chr1	65384424	65384659	236	sex-indep (robust)	TAD77_chr1	STAT5_sDHS	sex_indep_static (n=64,584)	not_bound	none	0	0	0	0	WE_496	WE	weak_enhancer	enhancer	chr1	65357830	65357832	+	pth2r	TAD77_chr1	26593	0.00848252	0.0170273	2.29312	2.29312	1	None	none	none	dDHS_close	none	none	none	none	216113_E5	E5	223461_E12	E12	0	NA	227.505	164	0.47	107.94	107.66
1063	chr1	65392600	65393002	403	Male (standard)	TAD77_chr1	STAT5_sDHS	male_bias_static (n=1895)	STAT5_bound	male_enriched	125	21	73	0	WE_497	WE	weak_enhancer	enhancer	chr1	65357830	65357832	+	pth2r	TAD77_chr1	34769	0.00848252	0.0170273	2.29312	2.29312	1	None	none	none	static	static	none	none	none	216117_E11	E11	223464_E12	E12	0	NA	381.267	375	0.02	205.086	169.18
1064	chr1	65430310	65430672	363	sex-indep (standard)	TAD77_chr1	STAT5_sDHS	sex_indep_static (n=64,584)	STAT5_bound	female_enriched	221	358	289.5	2	WE_498	WE	weak_enhancer	enhancer	chr1	65357830	65357832	+	pth2r	TAD77_chr1	72479	0.00848252	0.0170273	2.29312	2.29312	1	None	none	none	static	none	none	none	none	216123_E12	E12	223470_E12	E12	1	NA	167.883	59	1.51	59.367	96.125
1065	chr1	65434954	65435234	281	sex-indep (robust)	TAD77_chr1	STAT5_sDHS	sex_indep_static (n=64,584)	not_bound	none	0	0	0	0	Insul_107	Insul	insulator	insulator	chr1	65357830	65357832	+	pth2r	TAD77_chr1	77123	0.00848252	0.0170273	2.29312	2.29312	1	None	none	none	none	none	none	none	none	216126_E12	E12	223472_E12	E12	1	NA	50.208	69	-0.46	124.131	46.14
1066	chr1	65452205	65452552	348	sex-indep (robust)	TAD77_chr1	STAT5_hi_dDHS	sex_indep_dynamic (n=1532)	not_bound	none	0	0	0	2	WE_499	WE	weak_enhancer	enhancer	chr1	65357830	65357832	+	pth2r	TAD77_chr1	94374	0.00848252	0.0170273	2.29312	2.29312	1	None	none	none	dDHS_close	static	none	none	none	216128_E12	E12	223474_E12	E12	1	1000	538.167	179	1.59	97.146	269.15
1067	chr1	65454023	65454407	385	Male (robust)	TAD77_chr1	STAT5_hi_dDHS	male_bias_dynamic (n=834)	STAT5_bound	male_enriched	301	52	176.5	2	WE_500	WE	weak_enhancer	enhancer	chr1	65357830	65357832	+	pth2r	TAD77_chr1	96192	0.00848252	0.0170273	2.29312	2.29312	1	None	none	none	dDHS_close	static	none	none	none	216130_E12	E12	223478_E12	E12	1	1000	682.515	205	1.74	53.97	146.11
1068	chr1	65662333	65662543	211	Male (less stringent)	TAD77_chr1	STAT5_sDHS	male_bias_static (n=1895)	not_bound	none	0	0	0	0	WE_501	WE	weak_enhancer	enhancer	chr1	65357830	65357832	+	pth2r	TAD77_chr1	304502	0.00848252	0.0170273	2.29312	2.29312	1	None	none	none	dDHS_close	none	none	none	none	216138_E12	E12	223493_E2	E2	0	NA	210.246	87	1.27	64.764	53.83
1069	chr1	66147918	66148396	479	sex-indep (robust)	TAD78_chr1	STAT5_sDHS	sex_indep_static (n=64,584)	STAT5_bound	common	464	391	427.5	1	WE_502	WE	weak_enhancer	enhancer	chr1	66221902	66221904	+	map2	TAD78_chr1	73507	0.0703439	0.0617011	0.959147	-1.04259	1	None	none	none	static	static	static	static	static	216151_E5	E5	223517_E5	E5	1	NA	582.099	375	0.63	518.112	722.86
1070	chr1	66221574	66221829	256	sex-indep (robust)	TAD78_chr1	none	sex_indep_static (n=64,584)	not_bound	none	0	0	0	0	WE_503	WE	weak_enhancer	enhancer	chr1	66221902	66221904	+	map2	TAD78_chr1	74	0.0703439	0.0617011	0.959147	-1.04259	1	None	none	none	none	none	none	none	none	216154_E12	E12	223521_E12	E12	1	NA	59.622	47	0.34	80.955	30.76
1071	chr1	66597493	66597708	216	sex-indep (standard)	TAD78_chr1	STAT5_sDHS	sex_indep_static (n=64,584)	not_bound	none	0	0	0	0	WE_504	WE	weak_enhancer	enhancer	chr1	66515020	66515022	+	unc80	TAD78_chr1	82472	0.0018868	0.00412014	1.69499	1.69499	1	None	none	none	none	static	none	none	none	216186_E11	E11	223548_E11	E11	1	NA	97.278	96	0.02	102.543	130.73
1072	chr1	66717925	66718575	651	sex-indep (robust)	TAD79_chr1	STAT5_sDHS	sex_indep_static (n=64,584)	not_bound	none	0	0	0	0	WE_505	WE	weak_enhancer	enhancer	chr1	66747466	66747468	+	rpe	TAD79_chr1	28892	6.53129	6.40553	1.02014	1.02014	1	sex_indep	none	none	static	dDHS_close	none	none	none	216192_E8	E8	223556_E6	E6	0	NA	682.515	594	0.2	205.086	818.985
1073	chr1	66746925	66748094	1170	sex-indep (robust)	TAD79_chr1	STAT5_sDHS	sex_indep_static (n=64,584)	not_bound	none	0	0	0	2	Prom_148	Prom	promoter	promoter	chr1	66747466	66747468	+	rpe	TAD79_chr1	0	6.53129	6.40553	1.02014	1.02014	1	sex_indep	none	none	static	static	static	static	static	216201_E7	E7	223566_E7	E7	1	NA	1038.68	1104	-0.09	1095.59	822.83
1074	chr1	66824551	66824705	155	sex-indep (standard)	TAD79_chr1	STAT5_sDHS	sex_indep_static (n=64,584)	not_bound	none	0	0	0	0	WE_506	WE	weak_enhancer	enhancer	chr1	66864167	66864169	-	kansl1l	TAD79_chr1	39463	1.33674	1.19964	0.92885	-1.0766	1	sex_indep	none	none	none	none	none	none	none	216218_E11	E11	223591_E11	E11	1	NA	36.087	53	-0.55	59.367	99.97
1076	chr1	66908416	66908670	255	sex-indep (standard)	TAD79_chr1	none	sex_indep_static (n=64,584)	not_bound	none	0	0	0	0	Prom_149	Prom	promoter	promoter	chr1	66909881	66909883	-	acadl	TAD79_chr1	1212	45.9939	39.5697	0.89227	-1.12074	0.376508	sex_indep	none	none	none	none	none	none	none	216259_E7	E7	223634_E8	E8	0	NA	108.261	133	-0.3	134.925	111.505
1077	chr1	66908881	66910165	1285	sex-indep (robust)	TAD79_chr1	STAT5_sDHS	sex_indep_static (n=64,584)	not_bound	none	0	0	0	1	Prom_150	Prom	promoter	promoter	chr1	66909881	66909883	-	acadl	TAD79_chr1	0	45.9939	39.5697	0.89227	-1.12074	0.376508	sex_indep	none	none	dDHS_open	static	static	static	static	216261_E7	E7	223635_E7	E7	1	NA	1835.73	2111	-0.2	2245.15	1922.5
1078	chr1	66918189	66918503	315	sex-indep (robust)	TAD79_chr1	STAT5_sDHS	sex_indep_static (n=64,584)	not_bound	none	0	0	0	0	WE_507	WE	weak_enhancer	enhancer	chr1	66909881	66909883	-	acadl	TAD79_chr1	8307	45.9939	39.5697	0.89227	-1.12074	0.376508	sex_indep	none	none	static	none	none	none	none	216265_E13	E13	223639_E5	E5	0	NA	100.416	93	0.11	145.719	146.11
1079	chr1	66942246	66942532	287	sex-indep (standard)	TAD79_chr1	STAT5_sDHS	sex_indep_static (n=64,584)	not_bound	none	0	0	0	0	Insul_108	Insul	insulator	insulator	chr1	66909881	66909883	-	acadl	TAD79_chr1	32364	45.9939	39.5697	0.89227	-1.12074	0.376508	sex_indep	none	none	static	none	none	none	none	216270_E12	E12	223644_E12	E12	1	NA	116.106	101	0.2	102.543	103.815
1080	chr1	66947608	66947898	291	sex-indep (robust)	TAD79_chr1	STAT5_sDHS	sex_indep_static (n=64,584)	not_bound	none	0	0	0	1	WE_508	WE	weak_enhancer	enhancer	chr1	66981938	66981940	-	myl1	TAD79_chr1	34041	0	0	1	1	1	None	none	none	static	static	none	static	static	216272_E12	E12	223646_E12	E12	1	NA	160.038	113	0.5	75.558	192.25
1081	chr1	67045087	67045824	738	sex-indep (robust)	TAD79_chr1	STAT5_sDHS	sex_indep_static (n=64,584)	not_bound	none	0	0	0	0	WE_509	WE	weak_enhancer	enhancer	chr1	66991628	66991630	-	myl1	TAD79_chr1	53458	0	0	1	1	1	None	none	none	none	static	none	none	none	216285_E11	E11	223658_E11	E11	1	NA	318.507	245	0.38	280.644	565.215
1082	chr1	67047616	67047901	286	sex-indep (standard)	TAD79_chr1	none	sex_indep_static (n=64,584)	not_bound	none	0	0	0	0	WE_510	WE	weak_enhancer	enhancer	chr1	66991628	66991630	-	myl1	TAD79_chr1	55987	0	0	1	1	1	None	none	none	none	none	none	none	none	216286_E13	E13	223661_E11	E11	0	NA	70.605	45	0.65	70.161	80.745
1083	chr1	67048208	67049269	1062	sex-indep (robust)	TAD79_chr1	STAT5_sDHS	sex_indep_static (n=64,584)	STAT5_bound	female_enriched	275	504	389.5	3	WE_511	WE	weak_enhancer	enhancer	chr1	66991628	66991630	-	myl1	TAD79_chr1	56579	0	0	1	1	1	None	none	none	static	dDHS_close	static	static	static	216289_E6	E6	223664_E6	E6	1	NA	790.776	785	0.01	588.273	1430.34
1084	chr1	67049464	67049818	355	sex-indep (standard)	TAD80_chr1	none	sex_indep_static (n=64,584)	not_bound	none	0	0	0	1	WE_512	WE	weak_enhancer	enhancer	chr1	67085406	67085408	-	lancl1	TAD80_chr1	35589	2.24173	2.19411	1.01356	1.01356	1	sex_indep	none	none	none	none	none	none	none	216292_E9	E9	223666_E6	E6	0	NA	89.433	71	0.33	91.749	123.04
1085	chr1	67050259	67050497	239	sex-indep (robust)	TAD80_chr1	none	sex_indep_static (n=64,584)	not_bound	none	0	0	0	0	WE_513	WE	weak_enhancer	enhancer	chr1	67085406	67085408	-	lancl1	TAD80_chr1	34910	2.24173	2.19411	1.01356	1.01356	1	sex_indep	none	none	none	none	none	none	none	216294_E5	E5	223668_E5	E5	1	NA	98.847	83	0.25	91.749	173.025
1086	chr1	67050627	67050949	323	sex-indep (standard)	TAD80_chr1	none	sex_indep_static (n=64,584)	not_bound	none	0	0	0	1	WE_514	WE	weak_enhancer	enhancer	chr1	67085406	67085408	-	lancl1	TAD80_chr1	34458	2.24173	2.19411	1.01356	1.01356	1	sex_indep	none	none	none	none	none	none	none	216294_E5	E5	223668_E5	E5	1	NA	81.588	93	-0.19	86.352	161.49
1087	chr1	67051140	67051815	676	sex-indep (standard)	TAD80_chr1	none	sex_indep_static (n=64,584)	not_bound	none	0	0	0	1	WE_515	WE	weak_enhancer	enhancer	chr1	67085406	67085408	-	lancl1	TAD80_chr1	33592	2.24173	2.19411	1.01356	1.01356	1	sex_indep	none	none	none	none	none	none	none	216296_E14	E14	223668_E5	E5	0	NA	125.52	120	0.06	124.131	223.01
1088	chr1	67081915	67082056	142	sex-indep (standard)	TAD80_chr1	none	sex_indep_static (n=64,584)	not_bound	none	0	0	0	0	WE_516	WE	weak_enhancer	enhancer	chr1	67085406	67085408	-	lancl1	TAD80_chr1	3351	2.24173	2.19411	1.01356	1.01356	1	sex_indep	none	none	none	none	none	none	none	216305_E13	E13	223678_E14	E14	0	NA	32.949	15	1.14	43.176	34.605
1089	chr1	67085034	67085610	577	sex-indep (robust)	TAD80_chr1	STAT5_sDHS	sex_indep_static (n=64,584)	not_bound	none	0	0	0	0	Prom_151	Prom	promoter	promoter	chr1	67085406	67085408	-	lancl1	TAD80_chr1	0	2.24173	2.19411	1.01356	1.01356	1	sex_indep	none	none	static	none	none	static	static	216308_E7	E7	223682_E7	E7	1	NA	279.282	240	0.22	286.041	157.645
1090	chr1	67102109	67103042	934	sex-indep (robust)	TAD80_chr1	STAT5_sDHS	sex_indep_static (n=64,584)	STAT5_bound	common	669	986	827.5	2	WE_517	WE	weak_enhancer	enhancer	chr1	67085444	67085446	-	lancl1	TAD80_chr1	16664	2.24173	2.19411	1.01356	1.01356	1	sex_indep	none	none	static	static	static	none	none	216314_E6	E6	223687_E6	E6	1	NA	684.084	443	0.63	221.277	595.975
1091	chr1	67108098	67108458	361	sex-indep (robust)	TAD80_chr1	STAT5_sDHS	sex_indep_static (n=64,584)	not_bound	none	0	0	0	0	Insul_109	Insul	insulator	insulator	chr1	67085444	67085446	-	lancl1	TAD80_chr1	22653	2.24173	2.19411	1.01356	1.01356	1	sex_indep	none	none	static	static	none	static	static	216321_E6	E6	223692_E6	E6	1	NA	324.783	375	-0.21	318.423	342.205
1092	chr1	67109011	67109285	275	sex-indep (standard)	TAD80_chr1	none	sex_indep_static (n=64,584)	not_bound	none	0	0	0	0	Insul_110	Insul	insulator	insulator	chr1	67085444	67085446	-	lancl1	TAD80_chr1	23566	2.24173	2.19411	1.01356	1.01356	1	sex_indep	none	none	none	none	none	none	none	216322_E9	E9	223694_E6	E6	0	NA	62.76	69	-0.14	86.352	69.21
1093	chr1	67124023	67124859	837	sex-indep (robust)	TAD80_chr1	STAT5_sDHS	sex_indep_static (n=64,584)	STAT5_bound	common	472	187	329.5	2	Enh_224	Enh	enhancer	enhancer	chr1	67157560	67157562	-	nc_inter_c1_278	TAD80_chr1	32702	0.278758	0.385981	1.34686	1.34686	0.957825	None	none	none	static	static	static	static	static	216331_E6	E6	223706_E6	E6	1	NA	2744.18	2803	-0.03	2358.49	3325.93
1094	chr1	67125167	67125626	460	sex-indep (robust)	TAD80_chr1	STAT5_sDHS	sex_indep_static (n=64,584)	STAT5_bound	common	472	187	329.5	3	Enh_225	Enh	enhancer	enhancer	chr1	67157560	67157562	-	nc_inter_c1_278	TAD80_chr1	31935	0.278758	0.385981	1.34686	1.34686	0.957825	None	none	none	static	dDHS_close	none	none	none	216333_E6	E6	223708_E6	E6	1	NA	637.014	649	-0.03	447.951	849.745
1095	chr1	67139009	67139511	503	sex-indep (robust)	TAD80_chr1	STAT5_sDHS	sex_indep_static (n=64,584)	STAT5_bound	common	191	64	127.5	0	Enh_226	Enh	enhancer	enhancer	chr1	67157560	67157562	-	nc_inter_c1_278	TAD80_chr1	18050	0.278758	0.385981	1.34686	1.34686	0.957825	None	none	none	static	dDHS_close	static	static	static	216341_E6	E6	223719_E6	E6	1	NA	858.243	818	0.07	566.685	1015.08
1096	chr1	67140261	67140416	156	sex-indep (standard)	TAD80_chr1	none	sex_indep_static (n=64,584)	not_bound	none	0	0	0	0	WE_518	WE	weak_enhancer	enhancer	chr1	67157560	67157562	-	nc_inter_c1_278	TAD80_chr1	17145	0.278758	0.385981	1.34686	1.34686	0.957825	None	none	none	none	none	none	none	none	216343_E6	E6	223720_E9	E9	0	NA	51.777	53	-0.03	48.573	61.52
1097	chr1	67148756	67149354	599	sex-indep (robust)	TAD80_chr1	STAT5_sDHS	sex_indep_static (n=64,584)	not_bound	none	0	0	0	2	Enh_227	Enh	enhancer	enhancer	chr1	67157560	67157562	-	nc_inter_c1_278	TAD80_chr1	8207	0.278758	0.385981	1.34686	1.34686	0.957825	None	none	none	dDHS_close	static	dDHS_open	none	none	216348_E6	E6	223725_E6	E6	1	NA	848.829	570	0.57	280.644	480.625
1098	chr1	67149694	67149820	127	sex-indep (standard)	TAD80_chr1	none	sex_indep_static (n=64,584)	STAT5_bound	common	841	583	712	0	Enh_228	Enh	enhancer	enhancer	chr1	67157560	67157562	-	nc_inter_c1_278	TAD80_chr1	7741	0.278758	0.385981	1.34686	1.34686	0.957825	None	none	none	none	none	none	none	none	216350_E6	E6	223727_E6	E6	1	NA	65.898	66	0	70.161	61.52
1099	chr1	67150014	67150901	888	sex-indep (robust)	TAD80_chr1	STAT5_sDHS	sex_indep_static (n=64,584)	STAT5_bound	common	841	583	712	0	Enh_229	Enh	enhancer	enhancer	chr1	67157560	67157562	-	nc_inter_c1_278	TAD80_chr1	6660	0.278758	0.385981	1.34686	1.34686	0.957825	None	none	none	dDHS_close	static	static	static	static	216350_E6	E6	223729_E6	E6	1	NA	2110.3	2013	0.07	1894.35	2537.7
1100	chr1	67159900	67160583	684	sex-indep (robust)	TAD80_chr1	STAT5_sDHS	sex_indep_static (n=64,584)	STAT5_bound	common	609	386	497.5	3	WE_519	WE	weak_enhancer	enhancer	chr1	67157560	67157562	-	nc_inter_c1_278	TAD80_chr1	2339	0.278758	0.385981	1.34686	1.34686	0.957825	None	none	none	static	static	static	dDHS_open	static	216357_E6	E6	223736_E6	E6	1	NA	3029.74	1998	0.6	2164.2	2664.59
1101	chr1	67162863	67163703	841	sex-indep (robust)	TAD80_chr1	STAT5_sDHS	sex_indep_static (n=64,584)	STAT5_bound	common	2449	1764	2106.5	5	WE_520	WE	weak_enhancer	enhancer	chr1	67157560	67157562	-	nc_inter_c1_278	TAD80_chr1	5302	0.278758	0.385981	1.34686	1.34686	0.957825	None	none	none	static	static	dDHS_open	static	static	216361_E5	E5	223741_E6	E6	0	NA	7832.45	4411	0.83	5423.98	7205.53
1102	chr1	67164361	67164789	429	sex-indep (robust)	TAD80_chr1	STAT5_hi_dDHS	sex_indep_dynamic (n=1532)	STAT5_bound	common	2449	1764	2106.5	0	WE_521	WE	weak_enhancer	enhancer	chr1	67169600	67169602	+	cps1	TAD80_chr1	4812	418.642	292.323	0.724154	-1.38092	5.86713e-05	None	none	none	dDHS_close	none	none	none	none	216365_E6	E6	223743_E6	E6	1	1000	1110.85	481	1.21	253.659	642.115
1103	chr1	67169264	67169996	733	sex-indep (robust)	TAD80_chr1	STAT5_sDHS	sex_indep_static (n=64,584)	STAT5_bound	common	328	195	261.5	0	Prom_152	Prom	promoter	promoter	chr1	67169600	67169602	+	cps1	TAD80_chr1	0	418.642	292.323	0.724154	-1.38092	5.86713e-05	None	none	none	static	static	static	static	static	216376_E7	E7	223748_E7	E7	1	NA	1678.83	1489	0.17	1376.23	2222.41
1104	chr1	67171060	67172434	1375	sex-indep (robust)	TAD80_chr1	STAT5_sDHS	sex_indep_static (n=64,584)	not_bound	none	0	0	0	2	Prom_153	Prom	promoter	promoter	chr1	67169600	67169602	+	cps1	TAD80_chr1	1459	418.642	292.323	0.724154	-1.38092	5.86713e-05	None	none	none	static	dDHS_open	static	static	dDHS_open	216378_E7	E7	223751_E8	E8	0	NA	1699.23	1608	0.08	1727.04	1703.34
1105	chr1	67173947	67174589	643	sex-indep (robust)	TAD80_chr1	none	sex_indep_static (n=64,584)	STAT5_bound	common	129	93	111	3	Prom_154	Prom	promoter	promoter	chr1	67169600	67169602	+	cps1	TAD80_chr1	4346	418.642	292.323	0.724154	-1.38092	5.86713e-05	None	none	none	none	none	none	none	none	216380_E7	E7	223754_E7	E7	1	NA	392.25	367	0.1	399.378	422.95
1106	chr1	67175912	67176167	256	sex-indep (standard)	TAD80_chr1	none	sex_indep_static (n=64,584)	not_bound	none	0	0	0	0	WE_522	WE	weak_enhancer	enhancer	chr1	67169600	67169602	+	cps1	TAD80_chr1	6311	418.642	292.323	0.724154	-1.38092	5.86713e-05	None	none	none	none	none	none	none	none	216381_E8	E8	223759_E7	E7	0	NA	108.261	108	0	118.734	146.11
1107	chr1	67179584	67179736	153	sex-indep (standard)	TAD80_chr1	none	sex_indep_static (n=64,584)	not_bound	none	0	0	0	0	WE_523	WE	weak_enhancer	enhancer	chr1	67169600	67169602	+	cps1	TAD80_chr1	9983	418.642	292.323	0.724154	-1.38092	5.86713e-05	None	none	none	none	none	none	none	none	216388_E10	E10	223765_E9	E9	0	NA	40.794	42	-0.04	48.573	34.605
1108	chr1	67180084	67180442	359	sex-indep (standard)	TAD80_chr1	none	sex_indep_static (n=64,584)	not_bound	none	0	0	0	1	WE_524	WE	weak_enhancer	enhancer	chr1	67169600	67169602	+	cps1	TAD80_chr1	10483	418.642	292.323	0.724154	-1.38092	5.86713e-05	None	none	none	none	none	none	none	none	216390_E6	E6	223767_E6	E6	1	NA	166.314	140	0.25	199.689	215.32
1109	chr1	67189363	67189635	273	sex-indep (standard)	TAD80_chr1	none	sex_indep_static (n=64,584)	not_bound	none	0	0	0	0	WE_525	WE	weak_enhancer	enhancer	chr1	67169600	67169602	+	cps1	TAD80_chr1	19762	418.642	292.323	0.724154	-1.38092	5.86713e-05	None	none	none	none	none	none	none	none	216406_E9	E9	223777_E14	E14	0	NA	100.416	95	0.08	134.925	111.505
1110	chr1	67190321	67190677	357	sex-indep (robust)	TAD80_chr1	STAT5_sDHS	sex_indep_static (n=64,584)	not_bound	none	0	0	0	2	Insul_111	Insul	insulator	insulator	chr1	67169600	67169602	+	cps1	TAD80_chr1	20720	418.642	292.323	0.724154	-1.38092	5.86713e-05	None	none	none	static	none	none	none	none	216409_E6	E6	223777_E14	E14	0	NA	196.125	176	0.16	113.337	265.305
1111	chr1	67192482	67192883	402	sex-indep (standard)	TAD80_chr1	STAT5_sDHS	sex_indep_static (n=64,584)	not_bound	none	0	0	0	2	WE_526	WE	weak_enhancer	enhancer	chr1	67169600	67169602	+	cps1	TAD80_chr1	22881	418.642	292.323	0.724154	-1.38092	5.86713e-05	None	none	none	none	none	none	none	none	216415_E6	E6	223777_E14	E14	0	NA	221.229	189	0.23	188.895	346.05
1112	chr1	67193379	67193524	146	sex-indep (standard)	TAD80_chr1	none	sex_indep_static (n=64,584)	not_bound	none	0	0	0	2	WE_527	WE	weak_enhancer	enhancer	chr1	67169600	67169602	+	cps1	TAD80_chr1	23778	418.642	292.323	0.724154	-1.38092	5.86713e-05	None	none	none	none	none	none	none	none	216417_E6	E6	223779_E5	E5	0	NA	43.932	57	-0.38	53.97	73.055
1113	chr1	67194051	67194404	354	sex-indep (standard)	TAD80_chr1	none	sex_indep_static (n=64,584)	not_bound	none	0	0	0	0	WE_528	WE	weak_enhancer	enhancer	chr1	67169600	67169602	+	cps1	TAD80_chr1	24450	418.642	292.323	0.724154	-1.38092	5.86713e-05	None	none	none	none	none	none	none	none	216419_E6	E6	223780_E6	E6	1	NA	149.055	122	0.29	183.498	180.715
1114	chr1	67194788	67195135	348	sex-indep (standard)	TAD80_chr1	none	sex_indep_static (n=64,584)	not_bound	none	0	0	0	1	WE_529	WE	weak_enhancer	enhancer	chr1	67169600	67169602	+	cps1	TAD80_chr1	25187	418.642	292.323	0.724154	-1.38092	5.86713e-05	None	none	none	none	none	none	none	none	216421_E6	E6	223781_E9	E9	0	NA	142.779	124	0.2	167.307	215.32
1115	chr1	67196381	67196592	212	sex-indep (standard)	TAD80_chr1	none	sex_indep_static (n=64,584)	not_bound	none	0	0	0	0	WE_530	WE	weak_enhancer	enhancer	chr1	67169600	67169602	+	cps1	TAD80_chr1	26780	418.642	292.323	0.724154	-1.38092	5.86713e-05	None	none	none	none	none	none	none	none	216423_E11	E11	223784_E14	E14	0	NA	80.019	78	0.04	151.116	157.645
1116	chr1	67201311	67201700	390	sex-indep (standard)	TAD80_chr1	none	sex_indep_static (n=64,584)	not_bound	none	0	0	0	0	WE_531	WE	weak_enhancer	enhancer	chr1	67169600	67169602	+	cps1	TAD80_chr1	31710	418.642	292.323	0.724154	-1.38092	5.86713e-05	None	none	none	none	none	none	none	none	216426_E14	E14	223792_E11	E11	0	NA	141.21	118	0.26	129.528	223.01
1117	chr1	67201956	67202194	239	sex-indep (standard)	TAD80_chr1	none	sex_indep_static (n=64,584)	not_bound	none	0	0	0	0	WE_532	WE	weak_enhancer	enhancer	chr1	67169600	67169602	+	cps1	TAD80_chr1	32355	418.642	292.323	0.724154	-1.38092	5.86713e-05	None	none	none	none	none	none	none	none	216427_E6	E6	223792_E11	E11	0	NA	101.985	113	-0.15	134.925	176.87
1118	chr1	67202312	67202503	192	sex-indep (standard)	TAD80_chr1	none	sex_indep_static (n=64,584)	not_bound	none	0	0	0	0	WE_533	WE	weak_enhancer	enhancer	chr1	67169600	67169602	+	cps1	TAD80_chr1	32711	418.642	292.323	0.724154	-1.38092	5.86713e-05	None	none	none	none	none	none	none	none	216427_E6	E6	223792_E11	E11	0	NA	86.295	76	0.18	86.352	146.11
1119	chr1	67204363	67204723	361	sex-indep (standard)	TAD80_chr1	none	sex_indep_static (n=64,584)	not_bound	none	0	0	0	0	WE_534	WE	weak_enhancer	enhancer	chr1	67169600	67169602	+	cps1	TAD80_chr1	34762	418.642	292.323	0.724154	-1.38092	5.86713e-05	None	none	none	none	none	none	none	none	216430_E14	E14	223793_E14	E14	1	NA	141.21	153	-0.12	151.116	223.01
1120	chr1	67209690	67209852	163	sex-indep (standard)	TAD80_chr1	none	sex_indep_static (n=64,584)	not_bound	none	0	0	0	0	WE_535	WE	weak_enhancer	enhancer	chr1	67169600	67169602	+	cps1	TAD80_chr1	40089	418.642	292.323	0.724154	-1.38092	5.86713e-05	None	none	none	none	none	none	none	none	216430_E14	E14	223793_E14	E14	1	NA	65.898	58	0.18	64.764	88.435
1121	chr1	67210025	67210385	361	sex-indep (standard)	TAD80_chr1	none	sex_indep_static (n=64,584)	not_bound	none	0	0	0	0	WE_536	WE	weak_enhancer	enhancer	chr1	67169600	67169602	+	cps1	TAD80_chr1	40424	418.642	292.323	0.724154	-1.38092	5.86713e-05	None	none	none	none	none	none	none	none	216430_E14	E14	223793_E14	E14	1	NA	114.537	98	0.22	70.161	115.35
1122	chr1	67212635	67212804	170	sex-indep (standard)	TAD80_chr1	none	sex_indep_static (n=64,584)	not_bound	none	0	0	0	0	WE_537	WE	weak_enhancer	enhancer	chr1	67169600	67169602	+	cps1	TAD80_chr1	43034	418.642	292.323	0.724154	-1.38092	5.86713e-05	None	none	none	none	none	none	none	none	216430_E14	E14	223793_E14	E14	1	NA	94.14	103	-0.13	59.367	157.645
1123	chr1	67214815	67215129	315	sex-indep (standard)	TAD80_chr1	none	sex_indep_static (n=64,584)	not_bound	none	0	0	0	0	WE_538	WE	weak_enhancer	enhancer	chr1	67169600	67169602	+	cps1	TAD80_chr1	45214	418.642	292.323	0.724154	-1.38092	5.86713e-05	None	none	none	none	none	none	none	none	216430_E14	E14	223793_E14	E14	1	NA	152.193	148	0.04	161.91	169.18
[truncated: 69,114 more rows]
[truncated: 5 more columns]

## Sheet: 1A_Legend
Supplementary File 1A_Legend: Standard reference set of 70,211 liver DHS regions used in this study. Also see column headers in Table.
[truncated: 12 more rows]

[truncated: 4 more sheets: 1B_DHS-sex-biased gene ES, 1C_Unique DHS_sex-biased gene, 1D_DHS_Chromatin state_analys, 1E_Responses to GH infusion]
