# Supplementary material for: Plasma growth hormone pulses induce male-biased pulsatile chromatin opening and epigenetic regulation in adult mouse liver
Source: eLife. 2023 Dec 13;12:RP91367. doi: 10.7554/eLife.91367 (PMC10721219; doi:10.7554/eLife.91367)
Supplement: Supplementary file 2. — Shown are mouse liver gene expression for RefSeq and multi-exonic lncRNA genes, their sex-bias classification, and hypophysectomy response classes. Data shown are normalized differential expression ratios, calculated as intact-male/intact-female, corresponding fold-change (FC) values, normalized read counts (FPKM; fragments per kilobase of region of interest per million mapped reads) for male and female liver, and FDR (adjusted p-values) for the comparison. [file elife-91367-supp2.xlsx]

## Sheet: Suppl File 2_Sex-biased genes
Supplementary File 2 - Mouse liver gene expression for RefSeq (n=24,197) and multi-exonic lncRNA (n=3,152) genes, their sex-bias classification and hypophysectomy response classes. Data shown are normalized differential expression ratios, calculated as intact-male/intact-female, corresponding fold change (FC) values, normalized read counts (FPKM; fragments per kilobase of region of interest per m…
RNA-seq data used to define Gene Sex Bias													Hypox response class	# genes	% sex biased genes
Exp. no.	|FC| >	P <	Exp. info	Exp. samples									Male hypox class I	202	69% male-biased
416	1.5	0.05	RefSeq_ExonCollapsed_EdgeR_FeatureCounts_pval1:padj_pval2:pval	Male_Total_PolyA_G118M13M14M15_GeneBody/Female_Total_PolyA_G118M16M17M18_GeneBody									Male hypox class II	90	31% male-biased
547	2	0.05	LincRNA_ExonCollapsed_EdgeR_FeatureCounts_pval1:padj_pval2:pval	MN_Male_Nuclear_PolyA_G119_M3M4M5_ExonCollapsed/FN_Female_Nuclear_PolyA_G119_M6M7M8_ExonCollapsed									Female hypox class I	134	43% female-biased
RNA-seq data used to define Class Sex Bias													Female hypox class II	178	57% female-biased
Exp. no.	|FC| >	P <	Exp. info	Exp. samples
362	2	0.05	RefSeq_ExonCollapsed_EdgeR_FeatureCounts_pval1:padj_pval2:pval	Male_Hypox_Total_RiboZero_G141M15-G142M7_GeneBody/Male_Total_RiboZero_G118M19M20M21_GeneBody
363	2	0.05	refSeq_ExonCollapsed_EdgeR_FeatureCounts_pval1:padj_pval2:pval	Female_Hypox_Total_RiboZero_G142M15M16_GeneBody/Female_Total_RiboZero_G118M22-G119M1M2_GeneBody
595	2	0.05	LncRNA_ExonCollapsed_EdgeR_FeatureCounts_pval1:padj_pval2:pval	Male_Hypox_Total liver RNA_RiboMinus_G141M15_G142M7_ExonCollapsed/Male_Intact_Total liver RNA_RiboMinus_G138_M10M11M12_ExonCollapsed
599	2	0.05	LncRNA_ExonCollapsed_EdgeR_FeatureCounts_pval1:padj_pval2:pval	Female_Hypox_Total liver RNA_RiboMinus_G142_M15M16_ExonCollapsed/Female_Intact_Total liver RNA_RiboMinus_G138_M13M14M15_ExonCollapsed
								RNA-seq for Intact male vs. intact female
Gene ID	Gene Notes	Mapping Location(s)	Accession No.	Gene Name/Description	GO terms	Gene Symbol	Gene Type	Ratio	FC	FPKM Female liver	FPKM Male liver	FDR	Gene Sex Bias	Hypox Response Class of Sex-biased genes	Hypox Response Subclass
1700055N04RIK	[TAD3407_chr19],[Plus]	chr19:3,958,807-3,970,438	NM_028545	RIKEN cDNA 1700055N04 gene,	molecular_function (GO:0003674); aldehyde dehydrogenase [NAD(P)+] activity (GO:0004030); cellular_component (GO:0005575); biological_process (GO:0008150); metabolic process (GO:0008152); oxidoreductase activity (GO:0016491)	1700055N04Rik	RefSeq	0.0191207	-52.2994	0.852607	0.0141956	8.38993e-30	Female	class_I	IA
1700109K24RIK	[TAD2964_chr15],[Plus]	chr15:76,914,827-76,926,744	NR_108037	RIKEN cDNA 1700109K24 gene,	molecular_function (GO:0003674); cellular_component (GO:0005575); biological_process (GO:0008150)	1700109K24Rik	RefSeq	0.318017	-3.14449	0.282719	0.0807328	0.0264863	Female	no_response	none
1810011O10RIK	[TAD1619_chr8],[Minus]	chr8:25,548,087-25,549,418	NM_026931	RIKEN cDNA 1810011O10 gene, protein C8orf4 homolog	molecular_function (GO:0003674); cellular_component (GO:0005575); apoptotic process (GO:0006915); biological_process (GO:0008150)	1810011O10Rik	RefSeq	0.660872	-1.51315	7.94243	5.06663	0.00042014	Female	no_response	none
1810046K07RIK	[TAD1834_chr9],[Minus]	chr9:51,097,790-51,137,022	NM_027217	RIKEN cDNA 1810046K07 gene, uncharacterized protein C11orf53 homolog	molecular_function (GO:0003674); cellular_component (GO:0005575); biological_process (GO:0008150)	1810046K07Rik	RefSeq	0.620506	-1.61159	1.33594	0.79317	0.0269547	Female	no_response	none
2210013O21RIK	[TAD3599_chrX],[Plus]	chrX:150,158,096-150,175,839	NM_027327	RIKEN cDNA 2210013O21 gene, T helper cell-induced peptide 5	molecular_function (GO:0003674); cellular_component (GO:0005575); biological_process (GO:0008150)	2210013O21Rik	RefSeq	0.569197	-1.75686	1.77788	0.992336	0.0165516	Female	no_response	none
2700097O09RIK	[TAD2439_chr12],[Minus],[Overlapping_Isoform_Count: 2]	chr12:56,146,647-56,181,097	NM_028314 NR_030764	RIKEN cDNA 2700097O09 gene, uncharacterized protein LOC72658	molecular_function (GO:0003674); cellular_component (GO:0005575); extracellular space (GO:0005615); biological_process (GO:0008150); methyltransferase activity (GO:0008168); transferase activity (GO:0016740)	2700097O09Rik	RefSeq	0.567317	-1.76268	1.9074	1.02555	0.000537791	Female	class_II	IIA
4933416M06RIK	[TAD2688_chr13],[Plus]	chr13:102,024,273-102,063,351	NR_045846	RIKEN cDNA 4933416M06 gene,	molecular_function (GO:0003674); cellular_component (GO:0005575); biological_process (GO:0008150)	4933416M06Rik	RefSeq	0.271189	-3.68746	0.298049	0.0768136	0.00435245	Female	no_response	none
5530601H04RIK	[TAD3568_chrX],[Minus]	chrX:102,236,192-102,265,463	NR_015467	RIKEN cDNA 5530601H04 gene,	molecular_function (GO:0003674); cellular_component (GO:0005575); biological_process (GO:0008150)	5530601H04Rik	RefSeq	0.592061	-1.68901	0.531409	0.307606	0.00533447	Female	no_response	none
9030619P08RIK	[TAD2960_chr15],[Minus]	chr15:75,258,035-75,262,259	NR_108041	RIKEN cDNA 9030619P08 gene,	molecular_function (GO:0003674); cellular_component (GO:0005575); biological_process (GO:0008150)	9030619P08Rik	RefSeq	0.213308	-4.68805	37.0683	7.65119	2.29194e-70	Female	class_I	IB
9330133O14RIK	[TAD1754_chr8],[Plus]	chr8:124,967,555-124,970,376	NR_045696	RIKEN cDNA 9330133O14 gene,	molecular_function (GO:0003674); cellular_component (GO:0005575); biological_process (GO:0008150)	9330133O14Rik	RefSeq	0.467357	-2.13969	0.281518	0.121417	0.00994882	Female	no_response	none
A1BG	[TAD2939_chr15],[Minus]	chr15:60,749,143-60,752,825	NM_001081067	Alpha-1-B glycoprotein, alpha-1B-glycoprotein precursor	molecular_function (GO:0003674); cellular_component (GO:0005575); extracellular region (GO:0005576); biological_process (GO:0008150)	A1bg	RefSeq	0.00207374	-482.22	1238.83	2.48048	9.74606e-39	Female	class_I	IA
A330049N07RIK	[TAD2077_chr10],[Minus]	chr10:72,436,050-72,549,453	NR_040646	RIKEN cDNA A330049N07 gene,	molecular_function (GO:0003674); cellular_component (GO:0005575); biological_process (GO:0008150)	A330049N07Rik	RefSeq	0.5608	-1.78317	1.83518	0.987161	5.7584e-05	Female	class_II	IIB
ABCB1A	[TAD979_chr5],[Plus]	chr5:8,660,091-8,748,570	NM_011076	ATP-binding cassette, sub-family B (MDR/TAP), member 1A, multidrug resistance protein 1A	nucleotide binding (GO:0000166); ATP binding (GO:0005524); obsolete ATP catabolic process (GO:0006200); transport (GO:0006810); drug transmembrane transport (GO:0006855); xenobiotic transmembrane transporting ATPase activity (GO:0008559); drug transport (GO:0015893); membrane (GO:0016020); integral component of membrane (GO:0016021); hydrolase activity (GO:0016787); ATPase activity (GO:0016887); …	Abcb1a	RefSeq	0.451419	-2.21524	0.666419	0.287783	1.5053e-05	Female	no_response	none
ABCC1	[TAD3024_chr16],[Plus]	chr16:14,361,650-14,474,971	NM_008576	ATP-binding cassette, sub-family C (CFTR/MRP), member 1, multidrug resistance-associated protein 1	nucleotide binding (GO:0000166); transporter activity (GO:0005215); long-chain fatty acid transporter activity (GO:0005324); ATP binding (GO:0005524); cytoplasm (GO:0005737); plasma membrane (GO:0005886); integral component of plasma membrane (GO:0005887); obsolete ATP catabolic process (GO:0006200); transport (GO:0006810); drug transmembrane transport (GO:0006855); response to oxidative stress (…	Abcc1	RefSeq	0.60875	-1.64271	0.298783	0.172966	0.0343685	Female	class_II	IIA
ABCC4	[TAD2855_chr14],[Minus],[Overlapping_Isoform_Count: 3],[Overlaps with:Mir6391]	chr14:118,881,913-119,076,153 chr14:118,881,913-119,105,441	NM_001033336 NM_001163676 NM_001163675	ATP-binding cassette, sub-family C (CFTR/MRP), member 4, multidrug resistance-associated protein 4 isoform 2;multidrug resistance-associated protein 4 isoform 1;multidrug resistance-associated protein 4 isoform 3	nucleotide binding (GO:0000166); ATP binding (GO:0005524); obsolete membrane fraction (GO:0005624); plasma membrane (GO:0005886); drug transmembrane transport (GO:0006855); drug transmembrane transporter activity (GO:0015238); basolateral plasma membrane (GO:0016323); platelet dense granule membrane (GO:0031088); positive regulation of smooth muscle cell proliferation (GO:0048661)	Abcc4	RefSeq	0.404541	-2.47194	0.573986	0.221742	5.41615e-07	Female	class_II	IIA
ABCD2	[TAD2985_chr15],[Minus]	chr15:90,976,301-91,022,238	NM_011994	ATP-binding cassette, sub-family D (ALD), member 2, ATP-binding cassette sub-family D member 2	nucleotide binding (GO:0000166); protein binding (GO:0005515); ATP binding (GO:0005524); mitochondrion (GO:0005739); peroxisome (GO:0005777); peroxisomal membrane (GO:0005778); obsolete ATP catabolic process (GO:0006200); fatty acid metabolic process (GO:0006631); transport (GO:0006810); membrane (GO:0016020); integral component of membrane (GO:0016021); ATPase activity (GO:0016887); nucleoside-t…	Abcd2	RefSeq	0.155497	-6.43098	6.53619	0.981516	3.23551e-89	Female	class_II	IIA
ABHD2	[TAD1482_chr7],[Plus]	chr7:86,418,151-86,506,487	NM_018811	Abhydrolase domain containing 2, abhydrolase domain-containing protein 2	catalytic activity (GO:0003824); response to wounding (GO:0009611); membrane (GO:0016020); integral component of membrane (GO:0016021); hydrolase activity (GO:0016787); negative regulation of cell migration (GO:0030336)	Abhd2	RefSeq	0.451149	-2.21656	20.4061	8.89799	3.98609e-20	Female	no_response	none
ACNAT2	[TAD812_chr4],[Minus]	chr4:49,392,716-49,421,023	NM_145368	Acyl-coenzyme A amino acid N-acyltransferase 2, acyl-coenzyme A amino acid N-acyltransferase 2	molecular_function (GO:0003674); cellular_component (GO:0005575); peroxisome (GO:0005777); lipid metabolic process (GO:0006629); fatty acid metabolic process (GO:0006631); acyl-CoA metabolic process (GO:0006637); biological_process (GO:0008150); palmitoyl-CoA hydrolase activity (GO:0016290); transferase activity (GO:0016740); thiolester hydrolase activity (GO:0016790)	Acnat2	RefSeq	0.294574	-3.39473	39.3822	11.149	4.47424e-57	Female	class_I	IB
ACOT2	[TAD2488_chr12],[Plus]	chr12:85,328,810-85,334,825	NM_134188	acyl-CoA thioesterase 2, acyl-coenzyme A thioesterase 2, mitochondrial precursor	response to hypoxia (GO:0001666); mitochondrion (GO:0005739); lipid metabolic process (GO:0006629); acyl-CoA metabolic process (GO:0006637); palmitoyl-CoA hydrolase activity (GO:0016290); hydrolase activity (GO:0016787); thiolester hydrolase activity (GO:0016790); very long-chain fatty acid catabolic process (GO:0042760)	Acot2	RefSeq	0.386246	-2.58902	1.60041	0.599723	7.12048e-14	Female	class_II	IIB
ACOT3	[TAD2488_chr12],[Plus]	chr12:85,393,100-85,400,514	NM_134246	Acyl-CoA thioesterase 3, acyl-coenzyme A thioesterase 3	very long-chain fatty acid metabolic process (GO:0000038); long-chain fatty acid metabolic process (GO:0001676); catalytic activity (GO:0003824); peroxisome (GO:0005777); cytosol (GO:0005829); lipid metabolic process (GO:0006629); acyl-CoA metabolic process (GO:0006637); palmitoyl-CoA hydrolase activity (GO:0016290); hydrolase activity (GO:0016787); thiolester hydrolase activity (GO:0016790); sat…	Acot3	RefSeq	0.0443373	-22.5544	8.11988	0.338738	5.85092e-158	Female	class_II	IIA
ACOT4	[TAD2488_chr12],[Plus]	chr12:85,379,328-85,385,673	NM_134247	Acyl-CoA thioesterase 4, acyl-coenzyme A thioesterase 4	peroxisome (GO:0005777); succinyl-CoA metabolic process (GO:0006104); lipid metabolic process (GO:0006629); acyl-CoA metabolic process (GO:0006637); palmitoyl-CoA hydrolase activity (GO:0016290); hydrolase activity (GO:0016787); thiolester hydrolase activity (GO:0016790); dicarboxylic acid metabolic process (GO:0043648); short-chain fatty acid metabolic process (GO:0046459)	Acot4	RefSeq	0.300494	-3.32785	10.0676	2.91756	1.42303e-49	Female	class_II	IIB
ACOT6	[TAD2488_chr12],[Plus]	chr12:85,441,603-85,450,733	NM_172580	Acyl-CoA thioesterase 6, acyl-coenzyme A thioesterase 6	catalytic activity (GO:0003824); peroxisome (GO:0005777); protein targeting (GO:0006605); lipid metabolic process (GO:0006629); acyl-CoA metabolic process (GO:0006637); palmitoyl-CoA hydrolase activity (GO:0016290); hydrolase activity (GO:0016787); thiolester hydrolase activity (GO:0016790)	Acot6	RefSeq	0.543192	-1.84097	0.558876	0.292163	0.0149875	Female	class_II	IIB
ACSS2	[TAD499_chr2],[Plus]	chr2:155,343,778-155,388,479	NM_019811	Acyl-CoA synthetase short-chain family member 2, acetyl-coenzyme A synthetase, cytoplasmic	nucleotide binding (GO:0000166); catalytic activity (GO:0003824); obsolete gamma-glutamyltransferase activity (GO:0003840); acetate-CoA ligase activity (GO:0003987); ATP binding (GO:0005524); cytoplasm (GO:0005737); acetyl-CoA biosynthetic process (GO:0006085); glutathione biosynthetic process (GO:0006750); metabolic process (GO:0008152); integral component of membrane (GO:0016021); AMP binding (…	Acss2	RefSeq	0.627632	-1.59329	47.1089	28.4917	0.00044166	Female	no_response	none
ACSS3	[TAD2125_chr10],[Minus],[Overlapping_Isoform_Count: 2]	chr10:106,402,137-106,560,720 chr10:106,373,219-106,560,720	NM_001142804 NM_198636	Acyl-CoA synthetase short-chain family member 3, acyl-CoA synthetase short-chain family member 3, mitochondrial isoform 1;acyl-CoA synthetase short-chain family member 3, mitochondrial isoform 2	nucleotide binding (GO:0000166); molecular_function (GO:0003674); catalytic activity (GO:0003824); acetate-CoA ligase activity (GO:0003987); ATP binding (GO:0005524); mitochondrion (GO:0005739); lipid metabolic process (GO:0006629); fatty acid metabolic process (GO:0006631); biological_process (GO:0008150); metabolic process (GO:0008152); integral component of membrane (GO:0016021); ligase activi…	Acss3	RefSeq	0.289712	-3.4517	5.54814	1.54515	5.63148e-34	Female	class_I	IA
ACTG1	[TAD2374_chr11],[Minus],[Overlaps with:Mir6935]	chr11:120,207,003-120,209,798	NM_009609	Actin, gamma, cytoplasmic 1, actin, cytoplasmic 2 isoform 2;actin, cytoplasmic 2 isoform 1	nucleotide binding (GO:0000166); motor activity (GO:0003774); structural molecule activity (GO:0005198); structural constituent of cytoskeleton (GO:0005200); protein binding (GO:0005515); ATP binding (GO:0005524); cytoplasm (GO:0005737); cytoskeleton (GO:0005856); actin filament (GO:0005884); actin cytoskeleton (GO:0015629); myofibril (GO:0030016); filamentous actin (GO:0031941); costamere (GO:00…	Actg1	RefSeq	0.561295	-1.78159	64.5958	34.9184	1.33586e-12	Female	no_response	none
ADCY1	[TAD2171_chr11],[Plus]	chr11:6,963,491-7,078,508	NM_009622	Adenylate cyclase 1, adenylate cyclase type 1	nucleotide binding (GO:0000166); magnesium ion binding (GO:0000287); DNA binding (GO:0003677); catalytic activity (GO:0003824); adenylate cyclase activity (GO:0004016); guanylate cyclase activity (GO:0004383); calmodulin binding (GO:0005516); ATP binding (GO:0005524); nucleus (GO:0005634); plasma membrane (GO:0005886); cAMP biosynthetic process (GO:0006171); activation of adenylate cyclase activi…	Adcy1	RefSeq	0.182829	-5.46959	0.694316	0.122737	9.23553e-09	Female	class_I	IB
ADRB2	[TAD3357_chr18],[Minus]	chr18:62,337,366-62,339,635	NM_007420	Adrenergic receptor, beta 2, beta-2 adrenergic receptor	obsolete rhodopsin-like receptor activity (GO:0001584); regulation of systemic arterial blood pressure by norepinephrine-epinephrine (GO:0001993); diet induced thermogenesis (GO:0002024); norepinephrine-epinephrine-mediated vasodilation involved in regulation of systemic arterial blood pressure (GO:0002025); regulation of sodium ion transport (GO:0002028); signal transducer activity (GO:0004871);…	Adrb2	RefSeq	0.499421	-2.00232	0.429117	0.202027	0.0383676	Female	no_response	none
AI662270	[TAD2299_chr11],[Plus]	chr11:83,037,077-83,040,086	NR_015519	expressed sequence AI662270,	molecular_function (GO:0003674); cellular_component (GO:0005575); biological_process (GO:0008150)	AI662270	RefSeq	0.45666	-2.18981	1.2992	0.555264	0.00233185	Female	no_response	none
AIF1	[TAD3196_chr17],[Minus]	chr17:35,307,936-35,312,946	NM_019467	Allograft inflammatory factor 1, allograft inflammatory factor 1	ruffle (GO:0001726); phagocytic cup (GO:0001891); positive regulation of protein phosphorylation (GO:0001934); actin binding (GO:0003779); calcium ion binding (GO:0005509); protein binding (GO:0005515); cytoplasm (GO:0005737); cytosol (GO:0005829); cytoskeleton (GO:0005856); actin filament (GO:0005884); plasma membrane (GO:0005886); negative regulation of gene expression (GO:0010629); positive re…	Aif1	RefSeq	0.553514	-1.80664	3.73468	1.98726	0.00086221	Female	no_response	none
AKNA	[TAD835_chr4],[Minus]	chr4:63,028,161-63,064,479	NM_001045514	AT-hook transcription factor, AT-hook-containing transcription factor	molecular_function (GO:0003674); DNA binding (GO:0003677); cellular_component (GO:0005575); nucleus (GO:0005634); biological_process (GO:0008150)	Akna	RefSeq	0.616312	-1.62255	0.362028	0.214157	0.0382335	Female	class_II	IIA
AKR1B7	[TAD1206_chr6],[Plus]	chr6:34,362,361-34,373,137	NM_009731	Aldo-keto reductase family 1, member B7, aldose reductase-related protein 1	alditol:NADP+ 1-oxidoreductase activity (GO:0004032); oxidoreductase activity (GO:0016491); cellular lipid metabolic process (GO:0044255)	Akr1b7	RefSeq	0.347824	-2.87502	0.352564	0.116129	0.00666155	Female	no_response	none
AKR1C18	[TAD2538_chr13],[Minus]	chr13:4,131,872-4,149,877	NM_134066	Aldo-keto reductase family 1, member C18, aldo-keto reductase family 1 member C18	obsolete soluble fraction (GO:0005625); cytoplasm (GO:0005737); cytosol (GO:0005829); progesterone catabolic process (GO:0006709); parturition (GO:0007567); oxidoreductase activity (GO:0016491); progesterone metabolic process (GO:0042448); 17-alpha,20-alpha-dihydroxypregn-4-en-3-one dehydrogenase activity (GO:0047006); regulation of steroid biosynthetic process (GO:0050810); oxidation-reduction p…	Akr1c18	RefSeq	0.191583	-5.21966	0.258725	0.0434839	0.02665	Female	no_response	none
AKR1C20	[TAD2539_chr13],[Minus]	chr13:4,506,404-4,522,579	NM_054080	Aldo-keto reductase family 1, member C20, aldo-keto reductase family 1, member C20 isoform 2;aldo-keto reductase family 1, member C20 isoform 1	aldo-keto reductase (NADP) activity (GO:0004033); cellular_component (GO:0005575); steroid biosynthetic process (GO:0006694); oxidoreductase activity (GO:0016491)	Akr1c20	RefSeq	0.663364	-1.50747	40.6661	25.9843	7.746e-08	Female	no_response	none
AKR1D1	[TAD1213_chr6],[Plus]	chr6:37,480,172-37,518,815	NM_145364	Aldo-keto reductase family 1, member D1, 3-oxo-5-beta-steroid 4-dehydrogenase	cellular_component (GO:0005575); cytoplasm (GO:0005737); lipid metabolic process (GO:0006629); bile acid biosynthetic process (GO:0006699); steroid metabolic process (GO:0008202); oxidoreductase activity (GO:0016491); bile acid catabolic process (GO:0030573); 3-oxo-5-beta-steroid 4-dehydrogenase activity (GO:0047568); delta4-3-oxosteroid 5beta-reductase activity (GO:0047787); oxidation-reduction …	Akr1d1	RefSeq	0.555013	-1.80176	53.9132	28.8243	1.40493e-16	Female	no_response	none
ALDH1B1	[TAD805_chr4],[Plus]	chr4:45,811,893-45,817,480	NM_028270	Aldehyde dehydrogenase 1 family, member B1, aldehyde dehydrogenase X, mitochondrial precursor	molecular_function (GO:0003674); 3-chloroallyl aldehyde dehydrogenase activity (GO:0004028); aldehyde dehydrogenase (NAD) activity (GO:0004029); cellular_component (GO:0005575); extracellular space (GO:0005615); mitochondrion (GO:0005739); carbohydrate metabolic process (GO:0005975); biological_process (GO:0008150); metabolic process (GO:0008152); oxidoreductase activity (GO:0016491); oxidation-r…	Aldh1b1	RefSeq	0.563221	-1.7755	37.0624	20.1295	1.07958e-13	Female	no_response	none
ALDH3A2	[TAD2251_chr11],[Minus]	chr11:61,058,253-61,080,688	NM_007437	Aldehyde dehydrogenase family 3, subfamily A2, fatty aldehyde dehydrogenase	response to reactive oxygen species (GO:0000302); 3-chloroallyl aldehyde dehydrogenase activity (GO:0004028); aldehyde dehydrogenase (NAD) activity (GO:0004029); aldehyde dehydrogenase [NAD(P)+] activity (GO:0004030); nucleus (GO:0005634); mitochondrion (GO:0005739); mitochondrial inner membrane (GO:0005743); endoplasmic reticulum (GO:0005783); cytosol (GO:0005829); cellular aldehyde metabolic pr…	Aldh3a2	RefSeq	0.650085	-1.53826	36.4519	22.8223	3.25757e-08	Female	class_II	IIA
AMIGO2	[TAD2995_chr15],[Minus],[Overlapping_Isoform_Count: 3]	chr15:97,074,504-97,077,718	NM_178114 NM_001164602 NM_001164563	Adhesion molecule with Ig like domain 2, amphoterin-induced protein 2 precursor	molecular_function (GO:0003674); protein binding (GO:0005515); extracellular space (GO:0005615); nucleus (GO:0005634); plasma membrane (GO:0005886); cell adhesion (GO:0007155); homophilic cell adhesion via plasma membrane adhesion molecules (GO:0007156); heterophilic cell-cell adhesion via plasma membrane cell adhesion molecules (GO:0007157); membrane (GO:0016020); integral component of membrane …	Amigo2	RefSeq	0.513596	-1.94705	1.73518	0.861843	6.33962e-09	Female	no_response	none
ANKRD55	[TAD2710_chr13],[Plus],[Overlapping_Isoform_Count: 4]	chr13:113,078,658-113,134,849 chr13:113,078,725-113,146,389 chr13:113,078,658-113,174,210	NM_029898 NM_001168405 NM_001168403 NM_001168404	Ankyrin repeat domain 55, ankyrin repeat domain-containing protein 55 isoform 1;ankyrin repeat domain-containing protein 55 isoform 4;ankyrin repeat domain-containing protein 55 isoform 2;ankyrin repeat domain-containing protein 55 isoform 3	molecular_function (GO:0003674); DNA binding (GO:0003677); DNA binding transcription factor activity (GO:0003700); cellular_component (GO:0005575); regulation of transcription, DNA-templated (GO:0006355); biological_process (GO:0008150)	Ankrd55	RefSeq	0.299104	-3.34332	3.13564	0.898473	2.88972e-19	Female	class_II	IIA
ANXA6	[TAD2239_chr11],[Minus],[Overlapping_Isoform_Count: 2]	chr11:54,792,463-54,846,973	NM_001110211 NM_013472	Annexin A6, annexin A6 isoform b;annexin A6 isoform a	calcium ion binding (GO:0005509); calcium-dependent phospholipid binding (GO:0005544); cytoplasm (GO:0005737); calcium ion transport (GO:0006816); regulation of muscle contraction (GO:0006937); apical plasma membrane (GO:0016324); perinuclear region of cytoplasm (GO:0048471)	Anxa6	RefSeq	0.655903	-1.52461	21.5443	13.6317	3.76888e-09	Female	no_response	none
AR	[TAD3557_chrX],[Plus]	chrX:95,345,088-95,512,486	NM_013476	Androgen receptor, androgen receptor	in utero embryonic development (GO:0001701); DNA binding (GO:0003677); DNA binding transcription factor activity (GO:0003700); steroid hormone receptor activity (GO:0003707); androgen receptor activity (GO:0004882); signaling receptor binding (GO:0005102); steroid binding (GO:0005496); androgen binding (GO:0005497); protein binding (GO:0005515); nucleus (GO:0005634); cytoplasm (GO:0005737); regul…	Ar	RefSeq	0.2134	-4.68603	0.278173	0.053467	8.20646e-07	Female	class_I	IA
ARHGAP30	[TAD221_chr1],[Plus]	chr1:173,319,090-173,340,370	NM_001005508	Rho GTPase activating protein 30, rho GTPase-activating protein 30	molecular_function (GO:0003674); GTPase activator activity (GO:0005096); cellular_component (GO:0005575); intracellular (GO:0005622); signal transduction (GO:0007165); biological_process (GO:0008150); regulation of catalytic activity (GO:0050790)	Arhgap30	RefSeq	0.621359	-1.60937	1.00983	0.605635	0.0136588	Female	class_II	IIA
ARHGEF19	[TAD958_chr4],[Plus]	chr4:140,798,798-140,813,477	NM_172520	Rho guanine nucleotide exchange factor (GEF) 19, rho guanine nucleotide exchange factor 19	guanyl-nucleotide exchange factor activity (GO:0005085); Rho guanyl-nucleotide exchange factor activity (GO:0005089); GTPase activator activity (GO:0005096); intracellular (GO:0005622); regulation of Rho protein signal transduction (GO:0035023); regulation of catalytic activity (GO:0050790)	Arhgef19	RefSeq	0.602946	-1.65852	6.59229	3.83341	2.04873e-09	Female	no_response	none
ARHGEF37	[TAD3355_chr18],[Minus]	chr18:61,653,447-61,696,190	NM_177828	Rho guanine nucleotide exchange factor (GEF) 37, rho guanine nucleotide exchange factor 37	molecular_function (GO:0003674); guanyl-nucleotide exchange factor activity (GO:0005085); Rho guanyl-nucleotide exchange factor activity (GO:0005089); protein binding (GO:0005515); cellular_component (GO:0005575); intracellular (GO:0005622); cytoplasm (GO:0005737); biological_process (GO:0008150); regulation of Rho protein signal transduction (GO:0035023); regulation of catalytic activity (GO:005…	Arhgef37	RefSeq	0.54371	-1.83922	1.81003	0.956578	8.85307e-05	Female	no_response	none
ARL13B	[TAD3102_chr16],[Minus]	chr16:62,793,514-62,846,866	NM_026577	ADP-ribosylation factor-like 13B, ADP-ribosylation factor-like protein 13B	nucleotide binding (GO:0000166); molecular_function (GO:0003674); GTP binding (GO:0005525); cellular_component (GO:0005575); determination of left/right symmetry (GO:0007368); dorsal/ventral pattern formation (GO:0009953)	Arl13b	RefSeq	0.498766	-2.00495	2.15151	1.03326	0.0041173	Female	class_II	IIA
ARRDC4	[TAD1472_chr7],[Minus],[Overlapping_Isoform_Count: 2]	chr7:75,886,478-75,894,124 chr7:75,881,879-75,894,124	NM_025549 NM_001042592	Arrestin domain containing 4, arrestin domain-containing protein 4 isoform 1;arrestin domain-containing protein 4 isoform 2	molecular_function (GO:0003674); cellular_component (GO:0005575); biological_process (GO:0008150)	Arrdc4	RefSeq	0.456218	-2.19193	2.77929	1.21018	1.49084e-13	Female	no_response	none
ASB2	[TAD2512_chr12],[Minus]	chr12:104,559,351-104,594,211	NM_023049	Ankyrin repeat and SOCS box-containing 2, ankyrin repeat and SOCS box protein 2	DNA binding (GO:0003677); DNA binding transcription factor activity (GO:0003700); catalytic activity (GO:0003824); regulation of transcription, DNA-templated (GO:0006355)	Asb2	RefSeq	0.600466	-1.66537	1.08417	0.622521	0.00030024	Female	class_I	IA
ATF3	[TAD258_chr1],[Minus]	chr1:192,994,175-193,007,212	NM_007498	Activating transcription factor 3, cyclic AMP-dependent transcription factor ATF-3	DNA binding (GO:0003677); DNA binding transcription factor activity (GO:0003700); nucleus (GO:0005634); transcription factor complex (GO:0005667); gluconeogenesis (GO:0006094); regulation of transcription, DNA-templated (GO:0006355); positive regulation of cell proliferation (GO:0008284); obsolete transcription repressor activity (GO:0016564); sequence-specific DNA binding (GO:0043565); protein d…	Atf3	RefSeq	0.456335	-2.19137	0.781069	0.343761	0.0400344	Female	class_II	IIA
ATP2B2	[TAD1329_chr6],[Minus],[Overlapping_Isoform_Count: 2]	chr6:113,695,661-113,992,074 chr6:113,695,661-113,841,370	NM_009723 NM_001036684	ATPase, Ca++ transporting, plasma membrane 2, plasma membrane calcium-transporting ATPase 2	nucleotide binding (GO:0000166); magnesium ion binding (GO:0000287); cell morphogenesis (GO:0000902); catalytic activity (GO:0003824); calcium-transporting ATPase activity (GO:0005388); calcium ion binding (GO:0005509); calmodulin binding (GO:0005516); ATP binding (GO:0005524); endoplasmic reticulum (GO:0005783); obsolete microsome (GO:0005792); plasma membrane (GO:0005886); cilium (GO:0005929); …	Atp2b2	RefSeq	0.436601	-2.29042	0.440785	0.183364	9.10923e-08	Female	class_I	IA
ATP6V0D2	[TAD784_chr4],[Minus]	chr4:19,803,984-19,849,713	NM_175406	ATPase, H+ transporting, lysosomal V0 subunit D2, V-type proton ATPase subunit d 2	endosome (GO:0005768); early endosome (GO:0005769); transport (GO:0006810); ion transport (GO:0006811); proton-exporting ATPase activity, phosphorylative mechanism (GO:0008553); proton transmembrane transporter activity (GO:0015078); ATP synthesis coupled proton transport (GO:0015986); (GO:0015992); apical plasma membrane (GO:0016324); proton-transporting two-sector ATPase complex, proton-transpo…	Atp6v0d2	RefSeq	0.085271	-11.7273	4.22491	0.347295	7.04434e-70	Female	class_II	IIA
ATP8A1	[TAD1042_chr5],[Minus],[Overlapping_Isoform_Count: 3]	chr5:68,009,377-68,238,670	NM_001038999 NM_009727 NM_001284345	ATPase, aminophospholipid transporter (APLT), class I, type 8A, member 1, phospholipid-transporting ATPase IA isoform a;phospholipid-transporting ATPase IA isoform b;phospholipid-transporting ATPase IA isoform c	nucleotide binding (GO:0000166); magnesium ion binding (GO:0000287); catalytic activity (GO:0003824); phospholipid-translocating ATPase activity (GO:0004012); ATP binding (GO:0005524); obsolete ATP catabolic process (GO:0006200); ATP biosynthetic process (GO:0006754); cation transport (GO:0006812); metabolic process (GO:0008152); ATPase activity, coupled to transmembrane movement of ions, phospho…	Atp8a1	RefSeq	0.642686	-1.55597	0.625276	0.388639	0.000765835	Female	no_response	none
B3GALNT1	[TAD626_chr3],[Minus]	chr3:69,377,840-69,402,882	NM_020026	UDP-GalNAc:betaGlcNAc beta 1,3-galactosaminyltransferase, polypeptide 1, UDP-GalNAc:beta-1, 3-N-acetylgalactosaminyltransferase 1	extracellular space (GO:0005615); Golgi apparatus (GO:0005794); protein glycosylation (GO:0006486); galactosyltransferase activity (GO:0008378); UDP-galactose:beta-N-acetylglucosamine beta-1,3-galactosyltransferase activity (GO:0008499); oligosaccharide biosynthetic process (GO:0009312); membrane (GO:0016020); integral component of membrane (GO:0016021); transferase activity (GO:0016740); transfe…	B3galnt1	RefSeq	0.438633	-2.27981	0.461501	0.190345	0.00124948	Female	class_II	IIB
B430306N03RIK	[TAD3211_chr17],[Plus]	chr17:48,455,486-48,465,836	NM_177083	RIKEN cDNA B430306N03 gene, uncharacterized protein LOC320148 precursor	molecular_function (GO:0003674); cellular_component (GO:0005575); signal transduction (GO:0007165); biological_process (GO:0008150)	B430306N03Rik	RefSeq	0.589914	-1.69516	0.474713	0.266092	0.0102167	Female	no_response	none
BATF2	[TAD3409_chr19],[Plus]	chr19:6,164,457-6,172,475	NM_028967	Basic leucine zipper transcription factor, ATF-like 2, basic leucine zipper transcriptional factor ATF-like 2	molecular_function (GO:0003674); DNA binding (GO:0003677); DNA binding transcription factor activity (GO:0003700); cellular_component (GO:0005575); nucleus (GO:0005634); regulation of transcription, DNA-templated (GO:0006355); biological_process (GO:0008150); sequence-specific DNA binding (GO:0043565); protein dimerization activity (GO:0046983)	Batf2	RefSeq	0.346997	-2.88187	0.306829	0.0992664	0.0112218	Female	no_response	none
BC021614	[TAD3407_chr19],[Minus]	chr19:4,057,486-4,059,294	NM_144869	CDNA sequence BC021614, glutathione S-transferase P-like	molecular_function (GO:0003674); cellular_component (GO:0005575); biological_process (GO:0008150)	BC021614	RefSeq	0.165665	-6.03629	83.3971	13.218	1.50484e-07	Female	class_I	IC
BC029214	[TAD302_chr2],[Minus]	chr2:25,315,007-25,316,614	NM_153557	CDNA sequence BC029214, protein PAXX	molecular_function (GO:0003674); cellular_component (GO:0005575); biological_process (GO:0008150)	BC029214	RefSeq	0.576469	-1.7347	17.3493	9.64953	1.20246e-09	Female	class_I	IA
BC089597	[TAD2163_chr10],[Plus]	chr10:127,303,531-127,314,375	NM_145424	CDNA sequence BC089597, cis-retinol/3alpha hydroxysterol short-chain dehydrogenase-like precursor	molecular_function (GO:0003674); cellular_component (GO:0005575); biological_process (GO:0008150); oxidoreductase activity (GO:0016491); oxidation-reduction process (GO:0055114)	BC089597	RefSeq	0.309566	-3.23032	107.674	32.149	7.8143e-61	Female	class_II	IIA
BCHE	[TAD629_chr3],[Minus]	chr3:73,439,730-73,512,337	NM_009738	Butyrylcholinesterase, cholinesterase precursor	catalytic activity (GO:0003824); acetylcholinesterase activity (GO:0003990); cholinesterase activity (GO:0004104); extracellular region (GO:0005576); extracellular space (GO:0005615); obsolete membrane fraction (GO:0005624); nuclear envelope lumen (GO:0005641); endoplasmic reticulum (GO:0005783); endoplasmic reticulum lumen (GO:0005788); response to nutrient (GO:0007584); learning (GO:0007612); b…	Bche	RefSeq	0.416593	-2.40043	17.0151	6.82453	2.43167e-37	Female	class_II	IIA
BIN2	[TAD3000_chr15],[Minus],[Overlaps with:Mir6961]	chr15:100,471,512-100,499,931	NM_001270537	bridging integrator 2, bridging integrator 2	molecular_function (GO:0003674); cellular_component (GO:0005575); biological_process (GO:0008150)	Bin2	RefSeq	0.624134	-1.60222	1.69783	1.01913	0.000766152	Female	no_response	none
BMPER	[TAD1784_chr9],[Plus]	chr9:23,027,519-23,289,659	NM_028472	BMP-binding endothelial regulator, BMP-binding endothelial regulator protein precursor	ureteric bud development (GO:0001657); protein binding (GO:0005515); extracellular region (GO:0005576); negative regulation of BMP signaling pathway (GO:0030514)	Bmper	RefSeq	0.229377	-4.35964	0.79307	0.176666	8.16131e-16	Female	class_I	IA
C5AR1	[TAD1416_chr7],[Minus],[Overlapping_Isoform_Count: 2]	chr7:16,832,091-16,844,889 chr7:16,832,093-16,844,687	NM_007577 NM_001173550	Complement component 5a receptor 1, C5a anaphylatoxin chemotactic receptor 1	obsolete rhodopsin-like receptor activity (GO:0001584); complement component C5a binding (GO:0001856); complement receptor mediated signaling pathway (GO:0002430); signal transducer activity (GO:0004871); complement component C5a receptor activity (GO:0004878); G-protein coupled receptor activity (GO:0004930); plasma membrane (GO:0005886); chemotaxis (GO:0006935); complement activation (GO:000695…	C5ar1	RefSeq	0.367366	-2.72208	0.949972	0.333938	6.28806e-07	Female	no_response	none
C730036E19RIK	[TAD176_chr1],[Plus]	chr1:152,985,163-152,991,225	NR_038011	RIKEN cDNA C730036E19 gene,	molecular_function (GO:0003674); cellular_component (GO:0005575); biological_process (GO:0008150)	C730036E19Rik	RefSeq	0.545797	-1.83218	1.90908	0.998487	0.0103496	Female	class_I	IB
CABLES1	[TAD3285_chr18],[Plus],[Overlapping_Isoform_Count: 2]	chr18:11,997,782-12,104,136	NM_022021 NM_001146287	Cdk5 and Abl enzyme substrate 1, CDK5 and ABL1 enzyme substrate 1 isoform 2;CDK5 and ABL1 enzyme substrate 1 isoform 1	G1/S transition of mitotic cell cycle (GO:0000082); cytokinesis (GO:0000910); protein binding (GO:0005515); nucleus (GO:0005634); cytoplasm (GO:0005737); cell cycle (GO:0007049); nervous system development (GO:0007399); cyclin-dependent protein serine/threonine kinase regulator activity (GO:0016538); regulation of phosphorylation (GO:0042325); cell projection (GO:0042995); regulation of catalytic…	Cables1	RefSeq	0.451198	-2.21632	1.23039	0.536048	1.35763e-09	Female	class_II	IIA
CAMK1D	[TAD275_chr2],[Minus],[Overlapping_Isoform_Count: 4]	chr2:5,214,502-5,597,092 chr2:5,214,502-5,635,808	NM_177343 NM_001290374 NM_001290375 NM_001290376	Calcium/calmodulin-dependent protein kinase ID, calcium/calmodulin-dependent protein kinase type 1D isoform d;calcium/calmodulin-dependent protein kinase type 1D isoform c;calcium/calmodulin-dependent protein kinase type 1D isoform b;calcium/calmodulin-dependent protein kinase type 1D isoform a	nucleotide binding (GO:0000166); protein kinase activity (GO:0004672); protein serine/threonine kinase activity (GO:0004674); calmodulin-dependent protein kinase activity (GO:0004683); protein tyrosine kinase activity (GO:0004713); calmodulin binding (GO:0005516); ATP binding (GO:0005524); nucleus (GO:0005634); cytoplasm (GO:0005737); protein phosphorylation (GO:0006468); kinase activity (GO:0016…	Camk1d	RefSeq	0.490338	-2.03941	8.19715	3.87291	2.42999e-19	Female	no_response	none
CAMKK2	[TAD1116_chr5],[Minus],[Overlapping_Isoform_Count: 2]	chr5:123,181,179-123,229,419	NM_145358 NM_001199676	Calcium/calmodulin-dependent protein kinase kinase 2, beta, calcium/calmodulin-dependent protein kinase kinase 2 isoform 2;calcium/calmodulin-dependent protein kinase kinase 2 isoform 1	nucleotide binding (GO:0000166); protein kinase activity (GO:0004672); protein serine/threonine kinase activity (GO:0004674); calmodulin-dependent protein kinase activity (GO:0004683); protein tyrosine kinase activity (GO:0004713); calmodulin binding (GO:0005516); ATP binding (GO:0005524); obsolete soluble fraction (GO:0005625); cytoplasm (GO:0005737); protein phosphorylation (GO:0006468); kinase…	Camkk2	RefSeq	0.659215	-1.51695	2.85108	1.81001	7.47136e-05	Female	class_I	IA
CBR1	[TAD3129_chr16],[Plus]	chr16:93,608,081-93,610,594	NM_007620	Carbonyl reductase 1, carbonyl reductase [NADPH] 1	catalytic activity (GO:0003824); carbonyl reductase (NADPH) activity (GO:0004090); binding (GO:0005488); cellular_component (GO:0005575); nucleus (GO:0005634); cytoplasm (GO:0005737); obsolete microsome (GO:0005792); plasma membrane (GO:0005886); microvillus (GO:0005902); biological_process (GO:0008150); metabolic process (GO:0008152); oxidoreductase activity (GO:0016491); phylloquinone catabolic…	Cbr1	RefSeq	0.551967	-1.8117	35.4643	18.8617	1.29316e-17	Female	no_response	none
CCBE1	[TAD3368_chr18],[Minus],[Overlaps with:Mir694]	chr18:66,216,509-66,451,492	NM_178793	Collagen and calcium binding EGF domains 1, collagen and calcium-binding EGF domain-containing protein 1 precursor	angiogenesis (GO:0001525); molecular_function (GO:0003674); calcium ion binding (GO:0005509); cellular_component (GO:0005575); extracellular region (GO:0005576); multicellular organism development (GO:0007275); biological_process (GO:0008150)	Ccbe1	RefSeq	0.65088	-1.53638	0.60525	0.376738	0.0431149	Female	no_response	none
CCDC141	[TAD378_chr2],[Minus]	chr2:76,847,962-77,008,692	NM_001025576	coiled-coil domain containing 141, coiled-coil domain-containing protein 141	molecular_function (GO:0003674); cellular_component (GO:0005575); biological_process (GO:0008150)	Ccdc141	RefSeq	0.619155	-1.61511	2.1231	1.26145	1.51264e-06	Female	no_response	none
CCDC68	[TAD3377_chr18],[Plus]	chr18:70,085,212-70,129,138	NM_201362	Coiled-coil domain containing 68, coiled-coil domain-containing protein 68	molecular_function (GO:0003674); cellular_component (GO:0005575); biological_process (GO:0008150)	Ccdc68	RefSeq	0.612881	-1.63164	3.33936	1.94839	0.0202998	Female	no_response	none
CCHCR1	[TAD3196_chr17],[Plus]	chr17:35,654,060-35,667,960	NM_146248	Coiled-coil alpha-helical rod protein 1, coiled-coil alpha-helical rod protein 1	protein binding (GO:0005515); nucleus (GO:0005634); cytoplasm (GO:0005737); protein export from nucleus (GO:0006611); multicellular organism development (GO:0007275); cell differentiation (GO:0030154)	Cchcr1	RefSeq	0.627094	-1.59466	0.672215	0.407499	0.0176321	Female	no_response	none
CCL2	[TAD2296_chr11],[Plus]	chr11:81,849,078-81,850,954	NM_011333	Chemokine (C-C motif) ligand 2, C-C motif chemokine 2 precursor	G-protein coupled receptor binding (GO:0001664); positive regulation of endothelial cell proliferation (GO:0001938); cytokine activity (GO:0005125); protein binding (GO:0005515); extracellular region (GO:0005576); extracellular space (GO:0005615); cytoplasm (GO:0005737); cellular calcium ion homeostasis (GO:0006874); chemotaxis (GO:0006935); inflammatory response (GO:0006954); immune response (GO…	Ccl2	RefSeq	0.223968	-4.46492	2.04629	0.432328	0.0072643	Female	class_II	IIA
CCL5	[TAD2301_chr11],[Minus]	chr11:83,339,280-83,344,020	NM_013653	Chemokine (C-C motif) ligand 5, C-C motif chemokine 5 precursor	cytokine activity (GO:0005125); extracellular region (GO:0005576); extracellular space (GO:0005615); obsolete soluble fraction (GO:0005625); cytoplasm (GO:0005737); chemotaxis (GO:0006935); inflammatory response (GO:0006954); immune response (GO:0006955); signal transduction (GO:0007165); sensory perception (GO:0007600); chemokine activity (GO:0008009); positive regulation of fever generation (GO…	Ccl5	RefSeq	0.358364	-2.79046	1.31901	0.451161	0.00503913	Female	no_response	none
CCND1	[TAD1599_chr7end],[Minus]	chr7:152,115,835-152,125,830	NM_007631	Cyclin D1, G1/S-specific cyclin-D1	cyclin-dependent protein kinase holoenzyme complex (GO:0000307); re-entry into mitotic cell cycle (GO:0000320); cytokinesis (GO:0000910); protein kinase activity (GO:0004672); protein binding (GO:0005515); nucleus (GO:0005634); nucleoplasm (GO:0005654); cytoplasm (GO:0005737); cytosol (GO:0005829); protein phosphorylation (GO:0006468); cell cycle (GO:0007049); lactation (GO:0007595); positive reg…	Ccnd1	RefSeq	0.341613	-2.92729	10.9544	3.61142	2.50582e-31	Female	class_I	IA
CCRN4L	[TAD593_chr3],[Plus]	chr3:51,028,368-51,055,576	NM_009834	CCR4 carbon catabolite repression 4-like (S. cerevisiae),	rhythmic process (GO:0048511)	Ccrn4l	RefSeq	0.43388	-2.30478	4.70951	1.97684	2.07468e-05	Female	class_II	IIA
CD14	[TAD3317_chr18],[Minus],[Multi-counted reads: -, -, Intron-only_counting]	chr18:36,884,717-36,886,469	NM_009841	CD14 antigen, monocyte differentiation antigen CD14 precursor	lipopolysaccharide binding (GO:0001530); response to molecule of bacterial origin (GO:0002237); protein binding (GO:0005515); extracellular space (GO:0005615); plasma membrane (GO:0005886); inflammatory response (GO:0006954); immune response (GO:0006955); membrane (GO:0016020); anchored component of membrane (GO:0031225); positive regulation of tumor necrosis factor production (GO:0032760); innat…	Cd14	RefSeq	0.537533	-1.86035	2.15857	1.11202	0.0211404	Female	class_II	IIA
CD163	[TAD1354_chr6],[Plus],[Overlapping_Isoform_Count: 2]	chr6:124,254,668-124,280,545	NM_053094 NM_001170395	CD163 antigen, scavenger receptor cysteine-rich type 1 protein M130 isoform 1 precursor;scavenger receptor cysteine-rich type 1 protein M130 isoform 2 precursor	scavenger receptor activity (GO:0005044); cellular_component (GO:0005575); extracellular region (GO:0005576); extracellular space (GO:0005615); plasma membrane (GO:0005886); acute-phase response (GO:0006953); inflammatory response (GO:0006954); signal transduction (GO:0007165); biological_process (GO:0008150); membrane (GO:0016020); integral component of membrane (GO:0016021)	Cd163	RefSeq	0.647964	-1.5433	1.96577	1.22161	0.000308871	Female	no_response	none
CD274	[TAD3458_chr19],[Plus]	chr19:29,441,927-29,462,584	NM_021893	CD274 antigen, programmed cell death 1 ligand 1 precursor	protein binding (GO:0005515); extracellular space (GO:0005615); plasma membrane (GO:0005886); signal transduction (GO:0007165); external side of plasma membrane (GO:0009897); membrane (GO:0016020); integral component of membrane (GO:0016021); negative regulation of T cell proliferation (GO:0042130)	Cd274	RefSeq	0.229856	-4.35054	1.14466	0.250919	2.38995e-05	Female	class_II	IIA
CD300E	[TAD2364_chr11],[Minus]	chr11:114,913,230-114,923,352	NM_172050	CD300e antigen, CMRF35-like molecule 2 precursor	molecular_function (GO:0003674); cellular_component (GO:0005575); plasma membrane (GO:0005886); signal transduction (GO:0007165); biological_process (GO:0008150); membrane (GO:0016020); integral component of membrane (GO:0016021)	Cd300e	RefSeq	0.454863	-2.19846	1.07633	0.467179	0.00560336	Female	class_I	IA
CD36	[TAD985_chr5],[Minus],[Overlapping_Isoform_Count: 5]	chr5:17,287,507-17,394,777 chr5:17,287,507-17,355,610 chr5:17,287,507-17,341,714	NM_007643 NM_001159558 NM_001159555 NM_001159556 NM_001159557	CD36 antigen, platelet glycoprotein 4	long-chain fatty acid metabolic process (GO:0001676); pattern recognition receptor signaling pathway (GO:0002221); low-density lipoprotein particle receptor activity (GO:0005041); protein binding (GO:0005515); intracellular (GO:0005622); mitochondrion (GO:0005739); obsolete microsome (GO:0005792); Golgi apparatus (GO:0005794); plasma membrane (GO:0005886); caveola (GO:0005901); fatty acid metabol…	Cd36	RefSeq	0.615062	-1.62585	4.97909	2.95299	5.64606e-08	Female	class_II	IIB
CD3E	[TAD1822_chr9],[Minus]	chr9:44,806,825-44,817,673	NM_007648	CD3 antigen, epsilon polypeptide, T-cell surface glycoprotein CD3 epsilon chain precursor	immunological synapse (GO:0001772); positive regulation of T cell anergy (GO:0002669); signal transducer activity (GO:0004871); transmembrane signaling receptor activity (GO:0004888); protein binding (GO:0005515); plasma membrane (GO:0005886); signal transduction (GO:0007165); cell surface receptor signaling pathway (GO:0007166); response to nutrient (GO:0007584); external side of plasma membrane…	Cd3e	RefSeq	0.33512	-2.98401	0.492578	0.152857	0.0013817	Female	no_response	none
CD44	[TAD415_chr2],[Minus],[Overlapping_Isoform_Count: 6]	chr2:102,651,299-102,741,822	NM_001039151 NM_001039150 NM_009851 NM_001177786 NM_001177787 NM_001177785	CD44 antigen, CD44 antigen isoform b precursor;CD44 antigen isoform d precursor;CD44 antigen isoform c precursor;CD44 antigen isoform e precursor;CD44 antigen isoform f precursor;CD44 antigen isoform a precursor	regulation of cell growth (GO:0001558); branching involved in ureteric bud morphogenesis (GO:0001658); wound healing involved in inflammatory response (GO:0002246); signal transducer activity, downstream of receptor (GO:0005057); binding (GO:0005488); protein binding (GO:0005515); hyaluronic acid binding (GO:0005540); nucleus (GO:0005634); plasma membrane (GO:0005886); cell adhesion (GO:0007155);…	Cd44	RefSeq	0.558102	-1.79179	1.08467	0.578439	0.00241068	Female	no_response	none
CD52	[TAD940_chr4],[Minus]	chr4:133,649,452-133,650,988	NM_013706	CD52 antigen, CAMPATH-1 antigen precursor	extracellular space (GO:0005615); plasma membrane (GO:0005886); membrane (GO:0016020); integral component of membrane (GO:0016021); anchored component of membrane (GO:0031225)	Cd52	RefSeq	0.564079	-1.7728	2.06741	1.11297	0.0456933	Female	no_response	none
CD53	[TAD691_chr3],[Minus]	chr3:106,561,778-106,593,067	NM_007651	CD53 antigen, leukocyte surface antigen CD53	plasma membrane (GO:0005886); cell surface (GO:0009986); membrane (GO:0016020); integral component of membrane (GO:0016021)	Cd53	RefSeq	0.665385	-1.50289	1.91325	1.22053	0.0249904	Female	no_response	none
CD72	[TAD801_chr4],[Minus],[Overlapping_Isoform_Count: 4]	chr4:43,460,595-43,467,498	NM_001110320 NM_007654 NM_001110322 NM_001110321	CD72 antigen, B-cell differentiation antigen CD72 isoform 3;B-cell differentiation antigen CD72 isoform 4;B-cell differentiation antigen CD72 isoform 2;B-cell differentiation antigen CD72 isoform 1	binding (GO:0005488); plasma membrane (GO:0005886); defense response (GO:0006952); membrane (GO:0016020); integral component of membrane (GO:0016021)	Cd72	RefSeq	0.435332	-2.2971	0.558581	0.233123	0.0109323	Female	no_response	none
CD74	[TAD3354_chr18],[Plus],[Overlapping_Isoform_Count: 2],[Overlaps with:Mir5107]	chr18:60,963,502-60,972,306	NM_001042605 NM_010545	CD74 antigen (invariant polypeptide of major histocompatibility complex, class II antigen-associated), H-2 class II histocompatibility antigen gamma chain isoform 2;H-2 class II histocompatibility antigen gamma chain isoform 1	activation of MAPK activity (GO:0000187); positive regulation of cytokine-mediated signaling pathway (GO:0001961); cytokine receptor activity (GO:0004896); protein binding (GO:0005515); lysosome (GO:0005764); late endosome (GO:0005770); multivesicular body (GO:0005771); endoplasmic reticulum (GO:0005783); Golgi apparatus (GO:0005794); plasma membrane (GO:0005886); integral component of plasma mem…	Cd74	RefSeq	0.530719	-1.88424	40.9069	20.8868	0.0140035	Female	class_II	IIA
CD83	[TAD2599_chr13],[Plus],[Overlapping_Isoform_Count: 2]	chr13:43,880,480-43,898,502	NM_009856 NM_001289915	CD83 antigen, CD83 antigen isoform 2 precursor;CD83 antigen isoform 1 precursor	extracellular space (GO:0005615); plasma membrane (GO:0005886); external side of plasma membrane (GO:0009897); response to organic cyclic compound (GO:0014070); membrane (GO:0016020); integral component of membrane (GO:0016021); negative regulation of interleukin-4 production (GO:0032713); positive regulation of interleukin-10 production (GO:0032733); positive regulation of interleukin-2 producti…	Cd83	RefSeq	0.35371	-2.82718	0.612941	0.206478	0.000200843	Female	class_II	IIB
CDCP1	[TAD1970_chr9],[Minus]	chr9:123,081,402-123,125,156	NM_133974	CUB domain containing protein 1, CUB domain-containing protein 1 precursor	molecular_function (GO:0003674); cellular_component (GO:0005575); plasma membrane (GO:0005886); biological_process (GO:0008150); membrane (GO:0016020); integral component of membrane (GO:0016021)	Cdcp1	RefSeq	0.623253	-1.60448	1.08216	0.64983	0.00362379	Female	no_response	none
CDKN1C	[TAD1598_chr7],[Minus],[Overlapping_Isoform_Count: 2]	chr7:150,644,243-150,646,955	NM_009876 NM_001161624	Cyclin-dependent kinase inhibitor 1C (P57), cyclin-dependent kinase inhibitor 1C isoform 1;cyclin-dependent kinase inhibitor 1C isoform 2	negative regulation of transcription by RNA polymerase II (GO:0000122); protein kinase inhibitor activity (GO:0004860); cyclin-dependent protein serine/threonine kinase inhibitor activity (GO:0004861); protein binding (GO:0005515); nucleus (GO:0005634); cell cycle (GO:0007049); cell cycle arrest (GO:0007050); kinase activity (GO:0016301); phosphorylation (GO:0016310); negative regulation of phosp…	Cdkn1c	RefSeq	0.492485	-2.03052	0.840341	0.394925	0.000161102	Female	class_II	IIB
CDX4	[TAD3565_chrX],[Plus]	chrX:100,516,736-100,525,563	NM_007674	Caudal type homeobox 4, homeobox protein CDX-4	negative regulation of transcription by RNA polymerase II (GO:0000122); blood vessel development (GO:0001568); placenta development (GO:0001890); DNA binding (GO:0003677); DNA binding transcription factor activity (GO:0003700); nucleus (GO:0005634); transcription factor complex (GO:0005667); regulation of transcription, DNA-templated (GO:0006355); multicellular organism development (GO:0007275); …	Cdx4	RefSeq	0.0796084	-12.5615	0.91784	0.067003	2.2745e-20	Female	class_I	IA
CDYL2	[TAD1745_chr8],[Minus]	chr8:119,092,623-119,256,891	NM_029441	Chromodomain protein, Y chromosome-like 2, chromodomain Y-like protein 2	molecular_function (GO:0003674); nucleus (GO:0005634); biological_process (GO:0008150); isomerase activity (GO:0016853)	Cdyl2	RefSeq	0.613718	-1.62941	0.308727	0.182638	0.00692823	Female	class_II	IIA
CENPM	[TAD2972_chr15],[Minus],[Overlapping_Isoform_Count: 3]	chr15:82,064,205-82,075,177 chr15:82,064,205-82,074,766	NM_001080158 NM_178269 NM_025639	Centromere protein M, centromere protein M isoform 3;centromere protein M isoform 1;centromere protein M isoform 2	kinetochore (GO:0000776); molecular_function (GO:0003674); cellular_component (GO:0005575); nucleus (GO:0005634); chromosome (GO:0005694); cytoplasm (GO:0005737); biological_process (GO:0008150)	Cenpm	RefSeq	0.452502	-2.20993	2.79356	1.23905	8.85961e-08	Female	no_response	none
CEP152	[TAD445_chr2],[Minus]	chr2:125,388,823-125,450,849	NM_001081091	Centrosomal protein 152, centrosomal protein of 152 kDa	molecular_function (GO:0003674); cellular_component (GO:0005575); biological_process (GO:0008150)	Cep152	RefSeq	0.646025	-1.54793	1.1426	0.705553	0.001718	Female	no_response	none
CERS6	[TAD362_chr2],[Plus]	chr2:68,699,613-68,949,347	NM_172856			Cers6	RefSeq	0.628907	-1.59006	1.94826	1.17338	2.21896e-05	Female	class_II	IIB
CES1B	[TAD1713_chr8],[Minus]	chr8:95,580,625-95,603,916	NM_001081372			Ces1b	RefSeq	0.618157	-1.61771	118.739	70.765	1.97528e-11	Female	class_I	IB
CES1C	[TAD1713_chr8],[Minus]	chr8:95,622,914-95,655,182	NM_007954			Ces1c	RefSeq	0.622385	-1.60672	720.265	432.091	6.5664e-12	Female	class_I	IB
CFP	[TAD3528_chrX],[Minus]	chrX:20,502,660-20,508,650	NM_008823	Complement factor properdin, properdin precursor	extracellular region (GO:0005576); immune response (GO:0006955); complement activation, alternative pathway (GO:0006957); innate immune response (GO:0045087)	Cfp	RefSeq	0.566536	-1.76511	10.5244	5.75391	6.37855e-08	Female	no_response	none
CHIC1	[TAD3565_chrX],[Plus]	chrX:100,551,814-100,591,457	NM_009767	Cysteine-rich hydrophobic domain 1, cysteine-rich hydrophobic domain-containing protein 1	molecular_function (GO:0003674); cellular_component (GO:0005575); plasma membrane (GO:0005886); biological_process (GO:0008150); membrane (GO:0016020); cytoplasmic vesicle (GO:0031410)	Chic1	RefSeq	0.515628	-1.93938	1.97531	0.980248	2.76388e-10	Female	class_I	IB
CHRNA4	[TAD543_chr2],[Minus]	chr2:180,757,015-180,773,882	NM_015730	Cholinergic receptor, nicotinic, alpha polypeptide 4, neuronal acetylcholine receptor subunit alpha-4 precursor	action potential (GO:0001508); GABA-A receptor activity (GO:0004890); ion channel activity (GO:0005216); extracellular ligand-gated ion channel activity (GO:0005230); protein binding (GO:0005515); obsolete membrane fraction (GO:0005624); plasma membrane (GO:0005886); acetylcholine-gated channel complex (GO:0005892); transport (GO:0006810); ion transport (GO:0006811); cation transport (GO:0006812)…	Chrna4	RefSeq	0.605543	-1.65141	1.31332	0.763623	0.0435689	Female	class_I	IA
CLEC12A	[TAD1366_chr6],[Plus]	chr6:129,300,261-129,315,321	NM_177686	C-type lectin domain family 12, member a, C-type lectin domain family 12 member A	binding (GO:0005488); plasma membrane (GO:0005886); signal transduction (GO:0007165); cell surface (GO:0009986); membrane (GO:0016020); integral component of membrane (GO:0016021); protein phosphatase binding (GO:0019903); regulation of immune response (GO:0050776)	Clec12a	RefSeq	0.525754	-1.90203	1.05222	0.539962	0.00082285	Female	class_I	IA
CLIC3	[TAD302_chr2],[Plus]	chr2:25,312,362-25,314,292	NM_027085	Chloride intracellular channel 3, chloride intracellular channel protein 3	molecular_function (GO:0003674); ion channel activity (GO:0005216); voltage-gated ion channel activity (GO:0005244); voltage-gated chloride channel activity (GO:0005247); chloride channel activity (GO:0005254); cellular_component (GO:0005575); obsolete membrane fraction (GO:0005624); nucleus (GO:0005634); cytoplasm (GO:0005737); transport (GO:0006810); ion transport (GO:0006811); chloride transpo…	Clic3	RefSeq	0.496956	-2.01225	5.82	2.78504	0.00026627	Female	no_response	none
CMKLR1	[TAD1100_chr5],[Minus]	chr5:114,062,363-114,100,399	NM_008153	Chemokine-like receptor 1, chemokine-like receptor 1	obsolete rhodopsin-like receptor activity (GO:0001584); signal transducer activity (GO:0004871); G-protein coupled receptor activity (GO:0004930); plasma membrane (GO:0005886); integral component of plasma membrane (GO:0005887); chemotaxis (GO:0006935); signal transduction (GO:0007165); G-protein coupled receptor signaling pathway (GO:0007186); membrane (GO:0016020); integral component of membran…	Cmklr1	RefSeq	0.585609	-1.70762	0.613566	0.348828	0.0119938	Female	no_response	none
CMPK2	[TAD2404_chr12],[Plus]	chr12:27,154,079-27,164,702	NM_020557	Cytidine monophosphate (UMP-CMP) kinase 2, mitochondrial, UMP-CMP kinase 2, mitochondrial precursor	nucleotide binding (GO:0000166); cytidylate kinase activity (GO:0004127); thymidylate kinase activity (GO:0004798); ATP binding (GO:0005524); mitochondrion (GO:0005739); pyrimidine nucleotide biosynthetic process (GO:0006221); dTDP biosynthetic process (GO:0006233); dTTP biosynthetic process (GO:0006235); nucleotide biosynthetic process (GO:0009165); kinase activity (GO:0016301); phosphorylation …	Cmpk2	RefSeq	0.651912	-1.53395	1.34213	0.843546	0.00655114	Female	class_I	IA
CNST	[TAD236_chr1],[Plus]	chr1:181,476,659-181,557,604	NM_146105	Consortin, connexin sorting protein, consortin	protein binding (GO:0005515); cellular_component (GO:0005575); Golgi apparatus (GO:0005794); plasma membrane (GO:0005886); biological_process (GO:0008150); membrane (GO:0016020); integral component of membrane (GO:0016021); cytoplasmic vesicle (GO:0031410); connexin binding (GO:0071253)	Cnst	RefSeq	0.64771	-1.5439	1.40319	0.874525	7.31618e-05	Female	no_response	none
CORIN	[TAD1045_chr5],[Minus],[Overlapping_Isoform_Count: 2]	chr5:72,691,263-72,895,447 chr5:72,691,263-72,895,779	NM_001122756 NM_016869	corin, atrial natriuretic peptide-converting enzyme isoform 1;atrial natriuretic peptide-converting enzyme isoform 2	regulation of systemic arterial blood pressure by atrial natriuretic peptide (GO:0003050); catalytic activity (GO:0003824); serine-type endopeptidase activity (GO:0004252); obsolete chymotrypsin activity (GO:0004263); obsolete trypsin activity (GO:0004295); transmembrane signaling receptor activity (GO:0004888); scavenger receptor activity (GO:0005044); plasma membrane (GO:0005886); proteolysis (…	Corin	RefSeq	0.495151	-2.01958	2.24895	1.07074	1.32531e-09	Female	no_response	none
CRLS1	[TAD463_chr2],[Plus],[Overlapping_Isoform_Count: 2]	chr2:132,673,469-132,692,504 chr2:132,672,401-132,692,504	NM_025646 NM_001024385	Cardiolipin synthase 1, cardiolipin synthase (CMP-forming) isoform 1;cardiolipin synthase (CMP-forming) isoform 2	molecular_function (GO:0003674); mitochondrion (GO:0005739); mitochondrial inner membrane (GO:0005743); biological_process (GO:0008150); phospholipid biosynthetic process (GO:0008654); membrane (GO:0016020); integral component of membrane (GO:0016021); transferase activity (GO:0016740); phosphotransferase activity, for other substituted phosphate groups (GO:0016780)	Crls1	RefSeq	0.656881	-1.52235	15.2252	9.61228	7.60856e-08	Female	no_response	none
CSF1	[TAD693_chr3],[Minus],[Overlapping_Isoform_Count: 3]	chr3:107,548,512-107,563,387 chr3:107,543,965-107,563,387	NM_007778 NM_001113530 NM_001113529	Colony stimulating factor 1 (macrophage), macrophage colony-stimulating factor 1 isoform 2 precursor;macrophage colony-stimulating factor 1 isoform 1 precursor	ossification (GO:0001503); positive regulation of cell-matrix adhesion (GO:0001954); developmental process involved in reproduction (GO:0003006); cytokine activity (GO:0005125); macrophage colony-stimulating factor receptor binding (GO:0005157); protein binding (GO:0005515); extracellular region (GO:0005576); extracellular space (GO:0005615); plasma membrane (GO:0005886); growth factor activity (…	Csf1	RefSeq	0.592913	-1.68659	2.30061	1.31295	0.000175252	Female	class_II	IIA
CTBP2	[TAD1584_chr7;TAD1585_chr7],[Minus],[Overlapping_Isoform_Count: 2]	chr7:140,178,693-140,315,166 chr7:140,178,693-140,206,930	NM_009980 NM_001170744	C-terminal binding protein 2, C-terminal-binding protein 2 isoform 2;C-terminal-binding protein 2 isoform 1	transcription corepressor activity (GO:0003714); catalytic activity (GO:0003824); binding (GO:0005488); protein binding (GO:0005515); nucleus (GO:0005634); L-serine biosynthetic process (GO:0006564); metabolic process (GO:0008152); oxidoreductase activity (GO:0016491); obsolete transcription repressor activity (GO:0016564); oxidoreductase activity, acting on the CH-OH group of donors, NAD or NADP…	Ctbp2	RefSeq	0.637608	-1.56836	0.414364	0.250171	0.0152163	Female	no_response	none
CTH	[TAD767_chr3],[Minus]	chr3:157,557,211-157,588,027	NM_145953	Cystathionase (cystathionine gamma-lyase), cystathionine gamma-lyase	catalytic activity (GO:0003824); cystathionine beta-lyase activity (GO:0004121); cystathionine gamma-lyase activity (GO:0004123); cellular_component (GO:0005575); cytoplasm (GO:0005737); cellular amino acid metabolic process (GO:0006520); glutathione metabolic process (GO:0006749); negative regulation of cell proliferation (GO:0008285); cellular amino acid biosynthetic process (GO:0008652); lyase…	Cth	RefSeq	0.522958	-1.9122	165.86	83.6549	7.4295e-16	Female	class_II	IIB
CTSC	[TAD1499_chr7],[Plus]	chr7:95,426,602-95,459,385	NM_009982	Cathepsin C, dipeptidyl peptidase 1 isoform 1 preproprotein;dipeptidyl peptidase 1 isoform 2 precursor	cysteine-type endopeptidase activity (GO:0004197); obsolete dipeptidyl-peptidase I activity (GO:0004214); extracellular space (GO:0005615); lysosome (GO:0005764); endoplasmic reticulum (GO:0005783); Golgi apparatus (GO:0005794); proteolysis (GO:0006508); peptidase activity (GO:0008233); cysteine-type peptidase activity (GO:0008234); response to organic substance (GO:0010033); hydrolase activity (…	Ctsc	RefSeq	0.468233	-2.13569	35.4936	15.9945	7.92973e-25	Female	class_I	IA
CTSS	[TAD666_chr3],[Plus],[Overlapping_Isoform_Count: 2]	chr3:95,330,707-95,360,327	NM_021281 NM_001267695	Cathepsin S, cathepsin S isoform 2 preproprotein;cathepsin S isoform 1 preproprotein	cysteine-type endopeptidase activity (GO:0004197); obsolete cathepsin S activity (GO:0004218); extracellular space (GO:0005615); lysosome (GO:0005764); proteolysis (GO:0006508); peptidase activity (GO:0008233); cysteine-type peptidase activity (GO:0008234); membrane (GO:0016020); hydrolase activity (GO:0016787)	Ctss	RefSeq	0.655807	-1.52484	15.6061	9.8529	0.000170856	Female	no_response	none
CUX2	[TAD1113_chr5],[Minus]	chr5:122,310,224-122,497,834	NM_007804	Cut-like homeobox 2, homeobox protein cut-like 2	DNA binding (GO:0003677); DNA binding transcription factor activity (GO:0003700); nucleus (GO:0005634); regulation of transcription, DNA-templated (GO:0006355); obsolete transcription repressor activity (GO:0016564); obsolete transcription regulator activity (GO:0030528); sequence-specific DNA binding (GO:0043565); negative regulation of transcription, DNA-templated (GO:0045892)	Cux2	RefSeq	0.032909	-30.3868	2.95799	0.0910776	6.75673e-102	Female	class_I	IA
CXCL10	[TAD1069_chr5],[Minus]	chr5:92,775,664-92,777,915	NM_021274	Chemokine (C-X-C motif) ligand 10, C-X-C motif chemokine 10 precursor	positive regulation of leukocyte chemotaxis (GO:0002690); cytokine activity (GO:0005125); extracellular region (GO:0005576); extracellular space (GO:0005615); chemotaxis (GO:0006935); inflammatory response (GO:0006954); immune response (GO:0006955); signal transduction (GO:0007165); sensory perception (GO:0007600); chemokine activity (GO:0008009); positive regulation of cell proliferation (GO:000…	Cxcl10	RefSeq	0.203592	-4.9118	3.53741	0.684171	0.00241068	Female	class_II	IIA
CXCL11	[TAD1069_chr5],[Minus],[Overlapping_Isoform_Count: 2]	chr5:92,788,570-92,792,322 chr5:92,788,570-92,792,303	NM_019494 NR_038116	Chemokine (C-X-C motif) ligand 11, C-X-C motif chemokine 11 precursor	cytokine activity (GO:0005125); extracellular region (GO:0005576); extracellular space (GO:0005615); chemotaxis (GO:0006935); inflammatory response (GO:0006954); immune response (GO:0006955); sensory perception (GO:0007600); chemokine activity (GO:0008009)	Cxcl11	RefSeq	0.44666	-2.23884	1.75873	0.741769	2.01665e-07	Female	no_response	none
CXCL13	[TAD1071_chr5],[Plus]	chr5:96,385,957-96,390,087	NM_018866	Chemokine (C-X-C motif) ligand 13, C-X-C motif chemokine 13 precursor	cytokine activity (GO:0005125); extracellular region (GO:0005576); extracellular space (GO:0005615); chemotaxis (GO:0006935); inflammatory response (GO:0006954); immune response (GO:0006955); obsolete lymph gland development (GO:0007515); sensory perception (GO:0007600); chemokine activity (GO:0008009); lymph node development (GO:0048535)	Cxcl13	RefSeq	0.11393	-8.77735	3.58294	0.388066	9.58251e-05	Female	class_II	IIA
CXCL9	[TAD1069_chr5],[Minus]	chr5:92,750,356-92,757,105	NM_008599	Chemokine (C-X-C motif) ligand 9, C-X-C motif chemokine 9 precursor	cytokine activity (GO:0005125); extracellular region (GO:0005576); extracellular space (GO:0005615); inflammatory response (GO:0006954); immune response (GO:0006955); chemokine activity (GO:0008009)	Cxcl9	RefSeq	0.295275	-3.38668	3.45036	0.979357	2.29556e-07	Female	class_I	IA
CYBA	[TAD1754_chr8],[Minus],[Overlapping_Isoform_Count: 2]	chr8:124,948,670-124,956,840	NM_007806 NM_001301284	Cytochrome b-245, alpha polypeptide, cytochrome b-245 light chain isoform 2;cytochrome b-245 light chain isoform 1	positive regulation of endothelial cell proliferation (GO:0001938); negative regulation of glomerular filtration by angiotensin (GO:0003106); protein binding (GO:0005515); cytoplasm (GO:0005737); mitochondrion (GO:0005739); Golgi apparatus (GO:0005794); obsolete electron transport (GO:0006118); superoxide metabolic process (GO:0006801); transport (GO:0006810); regulation of blood pressure (GO:000…	Cyba	RefSeq	0.657634	-1.5206	5.13565	3.26232	0.0154617	Female	class_II	IIA
CYBB	[TAD3514_chrX],[Minus]	chrX:9,012,379-9,046,450	NM_007807	Cytochrome b-245, beta polypeptide, cytochrome b-245 heavy chain	ion channel activity (GO:0005216); voltage-gated ion channel activity (GO:0005244); iron ion binding (GO:0005506); protein binding (GO:0005515); intracellular (GO:0005622); cytoplasm (GO:0005737); mitochondrion (GO:0005739); endoplasmic reticulum (GO:0005783); rough endoplasmic reticulum (GO:0005791); Golgi apparatus (GO:0005794); plasma membrane (GO:0005886); obsolete electron transport (GO:0006…	Cybb	RefSeq	0.574784	-1.73979	2.72993	1.50683	0.000296369	Female	no_response	none
CYP17A1	[TAD3492_chr19],[Minus]	chr19:46,741,654-46,747,490	NM_007809	Cytochrome P450, family 17, subfamily a, polypeptide 1, steroid 17-alpha-hydroxylase/17,20 lyase precursor	monooxygenase activity (GO:0004497); steroid 17-alpha-monooxygenase activity (GO:0004508); iron ion binding (GO:0005506); mitochondrion (GO:0005739); endoplasmic reticulum (GO:0005783); obsolete electron transport (GO:0006118); steroid biosynthetic process (GO:0006694); C21-steroid hormone biosynthetic process (GO:0006700); glucocorticoid biosynthetic process (GO:0006704); transport (GO:0006810);…	Cyp17a1	RefSeq	0.06634	-15.0739	3.52913	0.218071	1.18532e-52	Female	class_I	IA
CYP2A22	[TAD1422_chr7],[Minus]	chr7:27,716,649-27,724,405	NM_001101467	Cytochrome P450, family 2, subfamily a, polypeptide 22, cytochrome P450, family 2, subfamily a, polypeptide 22 precursor	molecular_function (GO:0003674); monooxygenase activity (GO:0004497); cellular_component (GO:0005575); biological_process (GO:0008150); oxidoreductase activity (GO:0016491); metal ion binding (GO:0046872); oxidation-reduction process (GO:0055114)	Cyp2a22	RefSeq	0.0273971	-36.5002	15.304	0.411169	1.11636e-69	Female	class_II	IIB
CYP2A4	[TAD1421_chr7],[Plus]	chr7:27,092,210-27,100,107	NM_009997	Cytochrome P450, family 2, subfamily a, polypeptide 4, cytochrome P450 2A4	monooxygenase activity (GO:0004497); iron ion binding (GO:0005506); endoplasmic reticulum (GO:0005783); obsolete microsome (GO:0005792); obsolete electron transport (GO:0006118); transport (GO:0006810); electron transfer activity (GO:0009055); membrane (GO:0016020); oxidoreductase activity (GO:0016491); oxidoreductase activity, acting on paired donors, with incorporation or reduction of molecular…	Cyp2a4	RefSeq	0.0110884	-90.1839	106.762	1.15784	0	Female	class_I	IC
CYP2A5	[TAD1422_chr7],[Plus]	chr7:27,620,357-27,628,283	NM_007812	Cytochrome P450, family 2, subfamily a, polypeptide 4, cytochrome P450 2A5	monooxygenase activity (GO:0004497); endoplasmic reticulum (GO:0005783); obsolete microsome (GO:0005792); obsolete electron transport (GO:0006118); transport (GO:0006810); membrane (GO:0016020); oxidoreductase activity (GO:0016491); oxidoreductase activity, acting on paired donors, with incorporation or reduction of molecular oxygen, reduced flavin or flavoprotein as one donor, and incorporation …	Cyp2a5	RefSeq	0.51098	-1.95703	80.3843	39.5399	0.0013491	Female	class_II	IIB
CYP2B10	[TAD1421_chr7],[Plus]	chr7:26,682,676-26,711,643	NM_009999	Cytochrome P450, family 2, subfamily b, polypeptide 10, cytochrome P450 2B10 precursor	monooxygenase activity (GO:0004497); iron ion binding (GO:0005506); endoplasmic reticulum (GO:0005783); obsolete microsome (GO:0005792); obsolete electron transport (GO:0006118); transport (GO:0006810); steroid hydroxylase activity (GO:0008395); electron transfer activity (GO:0009055); membrane (GO:0016020); oxidoreductase activity (GO:0016491); oxidoreductase activity, acting on paired donors, w…	Cyp2b10	RefSeq	0.379698	-2.63367	13.5916	4.95297	1.23005e-17	Female	class_II	IIB
CYP2B13	[TAD1421_chr7],[Plus]	chr7:26,846,513-26,881,215	NM_007813	cytochrome P450, family 2, subfamily b, polypeptide 13, cytochrome P450, family 2, subfamily b, polypeptide 13 precursor	monooxygenase activity (GO:0004497); endoplasmic reticulum (GO:0005783); obsolete microsome (GO:0005792); obsolete electron transport (GO:0006118); transport (GO:0006810); membrane (GO:0016020); oxidoreductase activity (GO:0016491); oxidoreductase activity, acting on paired donors, with incorporation or reduction of molecular oxygen, reduced flavin or flavoprotein as one donor, and incorporation …	Cyp2b13	RefSeq	0.0018792	-532.141	65.9043	0.119825	0	Female	class_II	IIB
CYP2B9	[TAD1421_chr7],[Plus]	chr7:26,958,427-26,995,679	NM_010000	Cytochrome P450, family 2, subfamily b, polypeptide 9, cytochrome P450 2B9 precursor	monooxygenase activity (GO:0004497); iron ion binding (GO:0005506); endoplasmic reticulum (GO:0005783); obsolete microsome (GO:0005792); obsolete electron transport (GO:0006118); transport (GO:0006810); electron transfer activity (GO:0009055); membrane (GO:0016020); oxidoreductase activity (GO:0016491); oxidoreductase activity, acting on paired donors, with incorporation or reduction of molecular…	Cyp2b9	RefSeq	0.0177418	-56.3641	128.113	2.21092	0	Female	class_II	IIA
CYP2C37	[TAD3479_chr19],[Plus]	chr19:40,066,913-40,086,733	NM_010001	cytochrome P450, family 2. subfamily c, polypeptide 37, cytochrome P450 2C37 precursor	monooxygenase activity (GO:0004497); endoplasmic reticulum (GO:0005783); obsolete microsome (GO:0005792); obsolete electron transport (GO:0006118); transport (GO:0006810); membrane (GO:0016020); oxidoreductase activity (GO:0016491)	Cyp2c37	RefSeq	0.10899	-9.17518	92.7102	9.75317	9.35499e-116	Female	class_II	IIB
CYP2C38	[TAD3479_chr19],[Minus]	chr19:39,464,045-39,537,565	NM_010002	Cytochrome P450, family 2, subfamily c, polypeptide 38, cytochrome P450 2C38 precursor	monooxygenase activity (GO:0004497); iron ion binding (GO:0005506); endoplasmic reticulum (GO:0005783); obsolete microsome (GO:0005792); obsolete electron transport (GO:0006118); transport (GO:0006810); electron transfer activity (GO:0009055); membrane (GO:0016020); oxidoreductase activity (GO:0016491); heme binding (GO:0020037); metal ion binding (GO:0046872); oxidation-reduction process (GO:005…	Cyp2c38	RefSeq	0.271915	-3.67762	22.0452	5.75607	2.16659e-39	Female	class_II	IIA
CYP2C39	[TAD3479_chr19],[Plus]	chr19:39,585,311-39,643,019	NM_010003	Cytochrome P450, family 2, subfamily c, polypeptide 39, cytochrome P450 2C39 precursor	monooxygenase activity (GO:0004497); iron ion binding (GO:0005506); endoplasmic reticulum (GO:0005783); obsolete microsome (GO:0005792); obsolete electron transport (GO:0006118); transport (GO:0006810); electron transfer activity (GO:0009055); membrane (GO:0016020); oxidoreductase activity (GO:0016491); heme binding (GO:0020037); metal ion binding (GO:0046872); oxidation-reduction process (GO:005…	Cyp2c39	RefSeq	0.129373	-7.72958	211.332	26.3019	7.77358e-114	Female	class_I	IA
CYP2C40	[TAD3479_chr19],[Minus]	chr19:39,841,562-39,887,304	NM_010004	Cytochrome P450, family 2, subfamily c, polypeptide 40, cytochrome P450 2C40	monooxygenase activity (GO:0004497); extracellular space (GO:0005615); endoplasmic reticulum (GO:0005783); obsolete microsome (GO:0005792); obsolete electron transport (GO:0006118); transport (GO:0006810); membrane (GO:0016020); oxidoreductase activity (GO:0016491)	Cyp2c40	RefSeq	0.102246	-9.78034	132.892	13.0762	6.04758e-15	Female	class_I	IB
CYP2C50	[TAD3479_chr19],[Plus],[Overlapping_Isoform_Count: 3]	chr19:40,164,168-40,166,823 chr19:40,164,168-40,188,445	NM_134144 NM_001167877 NM_001167875	Cytochrome P450, family 2, subfamily c, polypeptide 50, cytochrome P450 2C50 isoform 3 precursor;cytochrome P450 2C50 isoform 1 precursor;cytochrome P450 2C50 isoform 2 precursor	monooxygenase activity (GO:0004497); iron ion binding (GO:0005506); endoplasmic reticulum (GO:0005783); obsolete microsome (GO:0005792); electron transfer activity (GO:0009055); membrane (GO:0016020); oxidoreductase activity (GO:0016491); heme binding (GO:0020037); metal ion binding (GO:0046872); oxidation-reduction process (GO:0055114); aromatase activity (GO:0070330)	Cyp2c50	RefSeq	0.569474	-1.75601	104.223	57.2273	2.00147e-18	Female	no_response	none
CYP2C54	[TAD3479_chr19],[Minus]	chr19:40,112,429-40,148,303	NM_206537	cytochrome P450, family 2, subfamily c, polypeptide 54, cytochrome P450 2C54 precursor	monooxygenase activity (GO:0004497); endoplasmic reticulum (GO:0005783); obsolete microsome (GO:0005792); obsolete electron transport (GO:0006118); transport (GO:0006810); membrane (GO:0016020); oxidoreductase activity (GO:0016491)	Cyp2c54	RefSeq	0.461544	-2.16664	131.183	58.4076	1.54363e-27	Female	no_response	none
CYP2C69	[TAD3479_chr19],[Minus]	chr19:39,917,149-39,961,259	NM_001104525	Cytochrome P450, family 2, subfamily c, polypeptide 69, cytochrome P450, family 2, subfamily c, polypeptide 69 precursor	molecular_function (GO:0003674); cellular_component (GO:0005575); biological_process (GO:0008150)	Cyp2c69	RefSeq	0.010638	-94.0026	204.767	2.10117	1.5756e-24	Female	class_I	IB
CYP2G1	[TAD1422_chr7],[Plus]	chr7:27,593,945-27,606,216	NM_013809	Cytochrome P450, family 2, subfamily g, polypeptide 1, cytochrome P450, family 2, subfamily g, polypeptide 1 precursor	monooxygenase activity (GO:0004497); protein binding (GO:0005515); extracellular space (GO:0005615); endoplasmic reticulum (GO:0005783); obsolete microsome (GO:0005792); obsolete electron transport (GO:0006118); sensory perception of smell (GO:0007608); membrane (GO:0016020); oxidoreductase activity (GO:0016491); metal ion binding (GO:0046872); oxidation-reduction process (GO:0055114)	Cyp2g1	RefSeq	0.158931	-6.29206	2.20892	0.349034	1.51045e-18	Female	class_II	IIA
CYP39A1	[TAD3205_chr17],[Plus],[Overlapping_Isoform_Count: 3]	chr17:43,804,320-43,888,380	NM_018887 NM_001285947 NM_001285948	Cytochrome P450, family 39, subfamily a, polypeptide 1, 24-hydroxycholesterol 7-alpha-hydroxylase isoform 2;24-hydroxycholesterol 7-alpha-hydroxylase isoform 1;24-hydroxycholesterol 7-alpha-hydroxylase isoform 3	monooxygenase activity (GO:0004497); iron ion binding (GO:0005506); cellular_component (GO:0005575); endoplasmic reticulum (GO:0005783); obsolete microsome (GO:0005792); obsolete electron transport (GO:0006118); lipid metabolic process (GO:0006629); bile acid biosynthetic process (GO:0006699); cholesterol catabolic process (GO:0006707); digestion (GO:0007586); steroid metabolic process (GO:000820…	Cyp39a1	RefSeq	0.277774	-3.60005	6.04729	1.60866	1.41284e-36	Female	class_I	IA
CYP3A16	[TAD1155_chr5],[Minus]	chr5:146,197,177-146,230,592	NM_007820	Cytochrome P450, family 3, subfamily a, polypeptide 16, cytochrome P450 3A16	monooxygenase activity (GO:0004497); iron ion binding (GO:0005506); endoplasmic reticulum (GO:0005783); obsolete microsome (GO:0005792); obsolete electron transport (GO:0006118); transport (GO:0006810); electron transfer activity (GO:0009055); membrane (GO:0016020); oxidoreductase activity (GO:0016491); oxidoreductase activity, acting on paired donors, with incorporation or reduction of molecular…	Cyp3a16	RefSeq	0.000730273	-1369.35	48.149	0.0344795	0	Female	class_I	IA
CYP3A41A	[TAD1155_chr5;TAD1156_chr5],[Minus],[nonOverlapping_Isoform_Count: 2],[Overlaps with:Cyp3a41b]	chr5:146,505,623-146,531,712 chr5:146,319,532-146,345,599	NM_017396	Cytochrome P450, family 3, subfamily a, polypeptide 41A, cytochrome P450 3A41	monooxygenase activity (GO:0004497); iron ion binding (GO:0005506); extracellular space (GO:0005615); endoplasmic reticulum (GO:0005783); obsolete microsome (GO:0005792); obsolete electron transport (GO:0006118); transport (GO:0006810); electron transfer activity (GO:0009055); membrane (GO:0016020); oxidoreductase activity (GO:0016491); oxidoreductase activity, acting on paired donors, with incor…	Cyp3a41a	RefSeq	0.00737377	-135.616	43.0017	0.309174	0	Female	class_I	IA
CYP3A41B	[TAD1155_chr5],[Minus],[Overlaps with:Cyp3a41a],[Multi-counted reads: Whole_gene_body, Exon-only_counting, Intron-only_counting]	chr5:146,319,532-146,345,599	NM_001105159	cytochrome P450, family 3, subfamily a, polypeptide 41B, cytochrome P450 3A41	molecular_function (GO:0003674); cellular_component (GO:0005575); biological_process (GO:0008150)	Cyp3a41b	RefSeq	0.00276285	-361.945	40.6765	0.104702	0	Female	class_I	IC
CYP3A44	[TAD1156_chr5],[Minus]	chr5:146,585,558-146,617,450	NM_177380	Cytochrome P450, family 3, subfamily a, polypeptide 44, cytochrome P450, family 3, subfamily a, polypeptide 44	molecular_function (GO:0003674); monooxygenase activity (GO:0004497); cellular_component (GO:0005575); biological_process (GO:0008150); oxidoreductase activity (GO:0016491); metal ion binding (GO:0046872); oxidation-reduction process (GO:0055114)	Cyp3a44	RefSeq	0.00503273	-198.699	106.472	0.526317	0	Female	class_I	IB
CYP46A1	[TAD2518_chr12],[Plus]	chr12:109,572,590-109,600,444	NM_010010	Cytochrome P450, family 46, subfamily a, polypeptide 1, cholesterol 24-hydroxylase precursor	monooxygenase activity (GO:0004497); iron ion binding (GO:0005506); extracellular space (GO:0005615); endoplasmic reticulum (GO:0005783); obsolete microsome (GO:0005792); obsolete electron transport (GO:0006118); lipid metabolic process (GO:0006629); transport (GO:0006810); steroid metabolic process (GO:0008202); cholesterol metabolic process (GO:0008203); electron transfer activity (GO:0009055);…	Cyp46a1	RefSeq	0.439039	-2.2777	8.90774	3.77266	7.11337e-14	Female	class_II	IIB
CYP4A10	[TAD906_chr4],[Plus]	chr4:115,190,891-115,206,254	NM_010011	Cytochrome P450, family 4, subfamily a, polypeptide 10, cytochrome P450 4A10	monooxygenase activity (GO:0004497); iron ion binding (GO:0005506); endoplasmic reticulum (GO:0005783); obsolete microsome (GO:0005792); fatty acid metabolic process (GO:0006631); electron transfer activity (GO:0009055); membrane (GO:0016020); integral component of membrane (GO:0016021); oxidoreductase activity (GO:0016491); alkane 1-monooxygenase activity (GO:0018685); heme binding (GO:0020037);…	Cyp4a10	RefSeq	0.225251	-4.43949	54.9537	11.9408	9.8346e-26	Female	class_II	IIB
CYP4A14	[TAD906_chr4],[Minus]	chr4:115,158,804-115,168,746	NM_007822	Cytochrome P450, family 4, subfamily a, polypeptide 14, cytochrome P450 4A14	monooxygenase activity (GO:0004497); iron ion binding (GO:0005506); endoplasmic reticulum (GO:0005783); obsolete microsome (GO:0005792); obsolete electron transport (GO:0006118); arachidonic acid monooxygenase activity (GO:0008391); electron transfer activity (GO:0009055); membrane (GO:0016020); integral component of membrane (GO:0016021); oxidoreductase activity (GO:0016491); alkane 1-monooxygen…	Cyp4a14	RefSeq	0.395023	-2.5315	25.3619	9.6681	2.26008e-07	Female	class_II	IIB
CYP4A31	[TAD906_chr4],[Plus],[Overlapping_Isoform_Count: 2]	chr4:115,236,253-115,251,620	NM_201640 NM_001252539	Cytochrome P450, family 4, subfamily a, polypeptide 31, cytochrome P450, family 4, subfamily a, polypeptide 31 isoform 1;cytochrome P450, family 4, subfamily a, polypeptide 31 isoform 2	molecular_function (GO:0003674); monooxygenase activity (GO:0004497); cellular_component (GO:0005575); biological_process (GO:0008150); oxidoreductase activity (GO:0016491); metal ion binding (GO:0046872); oxidation-reduction process (GO:0055114)	Cyp4a31	RefSeq	0.55521	-1.80112	1.18919	0.651181	0.0069888	Female	class_II	IIB
CYP4F16	[TAD3190_chr17],[Plus]	chr17:32,673,573-32,688,742	NM_024442	Cytochrome P450, family 4, subfamily f, polypeptide 16, cytochrome P450, family 4, subfamily f, polypeptide 16	molecular_function (GO:0003674); monooxygenase activity (GO:0004497); cellular_component (GO:0005575); extracellular space (GO:0005615); endoplasmic reticulum (GO:0005783); obsolete microsome (GO:0005792); obsolete electron transport (GO:0006118); biological_process (GO:0008150); membrane (GO:0016020); oxidoreductase activity (GO:0016491); metal ion binding (GO:0046872); oxidation-reduction proce…	Cyp4f16	RefSeq	0.659137	-1.51713	1.12681	0.724174	0.0209515	Female	no_response	none
CYP7A1	[TAD771_chr4],[Minus]	chr4:6,192,758-6,202,778	NM_007824	Cytochrome P450, family 7, subfamily a, polypeptide 1, cholesterol 7-alpha-monooxygenase	monooxygenase activity (GO:0004497); iron ion binding (GO:0005506); endoplasmic reticulum (GO:0005783); obsolete microsome (GO:0005792); obsolete electron transport (GO:0006118); lipid metabolic process (GO:0006629); bile acid biosynthetic process (GO:0006699); cholesterol catabolic process (GO:0006707); transport (GO:0006810); cholesterol 7-alpha-monooxygenase activity (GO:0008123); steroid meta…	Cyp7a1	RefSeq	0.640066	-1.56234	22.1824	13.7148	0.00136784	Female	class_I	IA
D130043K22RIK	[TAD2568_chr13],[Plus]	chr13:24,936,999-24,993,139	NM_001081051	RIKEN cDNA D130043K22 gene, dyslexia-associated protein KIAA0319 homolog precursor	plasma membrane (GO:0005886); membrane (GO:0016020); integral component of membrane (GO:0016021)	D130043K22Rik	RefSeq	0.66291	-1.5085	1.00167	0.63425	0.0133089	Female	no_response	none
DAPK1	[TAD2634_chr13],[Plus],[Overlapping_Isoform_Count: 3]	chr13:60,703,571-60,864,552 chr13:60,703,307-60,864,552	NM_134062 NM_029653 NM_001285917	Death associated protein kinase 1, death-associated protein kinase 1 isoform 1;death-associated protein kinase 1 isoform 2	nucleotide binding (GO:0000166); protein kinase activity (GO:0004672); protein serine/threonine kinase activity (GO:0004674); protein binding (GO:0005515); calmodulin binding (GO:0005516); ATP binding (GO:0005524); cytoplasm (GO:0005737); protein phosphorylation (GO:0006468); apoptotic process (GO:0006915); signal transduction (GO:0007165); kinase activity (GO:0016301); transferase activity (GO:0…	Dapk1	RefSeq	0.596415	-1.67669	12.8352	7.38059	2.72607e-12	Female	no_response	none
DCT	[TAD2854_chr14],[Minus]	chr14:118,412,011-118,451,468	NM_010024	Dopachrome tautomerase, L-dopachrome tautomerase precursor	dopachrome isomerase activity (GO:0004167); structural molecule activity (GO:0005198); extracellular space (GO:0005615); obsolete microsome (GO:0005792); cytosol (GO:0005829); melanin biosynthetic process from tyrosine (GO:0006583); metabolic process (GO:0008152); membrane (GO:0016020); integral component of membrane (GO:0016021); oxidoreductase activity (GO:0016491); isomerase activity (GO:00168…	Dct	RefSeq	0.334081	-2.99328	5.50381	1.77501	4.79145e-24	Female	class_I	IB
DDAH1	[TAD750_chr3],[Plus]	chr3:145,421,655-145,557,241	NM_026993	Dimethylarginine dimethylaminohydrolase 1, N(G),N(G)-dimethylarginine dimethylaminohydrolase 1	cytoplasm (GO:0005737); mitochondrion (GO:0005739); arginine metabolic process (GO:0006525); nitric oxide biosynthetic process (GO:0006809); zinc ion binding (GO:0008270); dimethylargininase activity (GO:0016403); amino acid binding (GO:0016597); transferase activity (GO:0016740); hydrolase activity (GO:0016787); hydrolase activity, acting on carbon-nitrogen (but not peptide) bonds, in linear ami…	Ddah1	RefSeq	0.580902	-1.72146	18.6763	10.4554	9.43478e-12	Female	class_II	IIB
DHRS7	[TAD2461_chr12],[Minus]	chr12:73,751,339-73,765,815	NM_025522	Dehydrogenase/reductase (SDR family) member 7, dehydrogenase/reductase SDR family member 7 precursor	molecular_function (GO:0003674); catalytic activity (GO:0003824); binding (GO:0005488); cellular_component (GO:0005575); biological_process (GO:0008150); metabolic process (GO:0008152); oxidoreductase activity (GO:0016491); oxidation-reduction process (GO:0055114)	Dhrs7	RefSeq	0.491619	-2.0341	14.4145	6.80148	2.98884e-15	Female	class_II	IIA
DLEU2	[TAD2800_chr14],[Minus],[Overlaps with:Mir15a;Mir16-1]	chr14:62,221,672-62,301,210	NR_028264	Deleted in lymphocytic leukemia, 2,	molecular_function (GO:0003674); cellular_component (GO:0005575); biological_process (GO:0008150)	Dleu2	RefSeq	0.459826	-2.17474	3.27253	1.46321	1.16011e-11	Female	no_response	none
DLG4	[TAD2269_chr11],[Plus],[Overlapping_Isoform_Count: 2]	chr11:69,832,106-69,859,033	NM_001109752 NM_007864	Discs, large homolog 4 (Drosophila), disks large homolog 4 isoform 2;disks large homolog 4 isoform 1	signaling receptor binding (GO:0005102); structural molecule activity (GO:0005198); protein binding (GO:0005515); obsolete membrane fraction (GO:0005624); cytoplasm (GO:0005737); plasma membrane (GO:0005886); locomotory behavior (GO:0007626); protein C-terminus binding (GO:0008022); postsynaptic density (GO:0014069); membrane (GO:0016020); synaptic vesicle maturation (GO:0016188); obsolete synapt…	Dlg4	RefSeq	0.495223	-2.01929	0.266635	0.128278	0.00995972	Female	no_response	none
DLL1	[TAD3160_chr17],[Minus]	chr17:15,504,317-15,512,787	NM_007865	Delta-like 1 (Drosophila), delta-like protein 1 precursor	in utero embryonic development (GO:0001701); somitogenesis (GO:0001756); somite specification (GO:0001757); Notch binding (GO:0005112); calcium ion binding (GO:0005509); protein binding (GO:0005515); extracellular space (GO:0005615); plasma membrane (GO:0005886); cell communication (GO:0007154); Notch signaling pathway (GO:0007219); multicellular organism development (GO:0007275); determination o…	Dll1	RefSeq	0.567812	-1.76115	0.859174	0.467284	3.52656e-05	Female	no_response	none
DNTT	[TAD3481_chr19],[Plus],[Overlapping_Isoform_Count: 2]	chr19:41,103,764-41,134,015	NM_001043228 NM_009345	Deoxynucleotidyltransferase, terminal, DNA nucleotidylexotransferase isoform 2;DNA nucleotidylexotransferase isoform 1	magnesium ion binding (GO:0000287); DNA binding (GO:0003677); catalytic activity (GO:0003824); DNA-directed DNA polymerase activity (GO:0003887); DNA nucleotidylexotransferase activity (GO:0003912); intracellular (GO:0005622); nucleus (GO:0005634); cytoplasm (GO:0005737); DNA metabolic process (GO:0006259); DNA replication (GO:0006260); DNA modification (GO:0006304); transferase activity (GO:0016…	Dntt	RefSeq	0.475471	-2.10318	1.0554	0.490203	0.000363805	Female	class_I	IA
DOCK10	[TAD96_chr1],[Minus],[Overlapping_Isoform_Count: 2]	chr1:80,497,642-80,755,128 chr1:80,497,642-80,661,927	NM_175291 NM_001285927	Dedicator of cytokinesis 10, dedicator of cytokinesis protein 10 isoform 2;dedicator of cytokinesis protein 10 isoform 1	guanyl-nucleotide exchange factor activity (GO:0005085); Rho guanyl-nucleotide exchange factor activity (GO:0005089); GTP binding (GO:0005525); cellular_component (GO:0005575); biological_process (GO:0008150); Rho GTPase binding (GO:0017048); regulation of catalytic activity (GO:0050790); GTPase binding (GO:0051020)	Dock10	RefSeq	0.563487	-1.77466	0.567528	0.303195	0.000156297	Female	no_response	none
DOCK7	[TAD873_chr4],[Minus],[Overlapping_Isoform_Count: 2]	chr4:98,603,349-98,787,606	NM_026082 NM_001290636	Dedicator of cytokinesis 7, dedicator of cytokinesis protein 7 isoform 2;dedicator of cytokinesis protein 7 isoform 1	guanyl-nucleotide exchange factor activity (GO:0005085); GTP binding (GO:0005525); multicellular organism development (GO:0007275); nervous system development (GO:0007399); cell differentiation (GO:0030154); cell projection (GO:0042995); pigmentation (GO:0043473); Rac GTPase binding (GO:0048365); regulation of catalytic activity (GO:0050790); GTPase binding (GO:0051020)	Dock7	RefSeq	0.615732	-1.62408	1.64598	0.980798	1.58451e-06	Female	class_II	IIA
DQX1	[TAD1280_chr6],[Plus]	chr6:83,007,837-83,017,213	NM_033606	DEAQ RNA-dependent ATPase, ATP-dependent RNA helicase DQX1	nucleotide binding (GO:0000166); nucleic acid binding (GO:0003676); helicase activity (GO:0004386); binding (GO:0005488); ATP binding (GO:0005524); cellular_component (GO:0005575); nucleus (GO:0005634); mitochondrial inner membrane (GO:0005743); obsolete ATP catabolic process (GO:0006200); transport (GO:0006810); ATP-dependent helicase activity (GO:0008026); biological_process (GO:0008150); hydro…	Dqx1	RefSeq	0.538781	-1.85604	3.48501	1.81326	3.47226e-11	Female	class_II	IIA
DRAM1	[TAD2100_chr10],[Minus]	chr10:87,785,548-87,819,820	NM_027878	DNA-damage regulated autophagy modulator 1, DNA damage-regulated autophagy modulator protein 1	molecular_function (GO:0003674); cellular_component (GO:0005575); lysosome (GO:0005764); autophagy (GO:0006914); apoptotic process (GO:0006915); biological_process (GO:0008150); membrane (GO:0016020); integral component of membrane (GO:0016021)	Dram1	RefSeq	0.393631	-2.54045	0.409066	0.150205	0.0374507	Female	class_II	IIA
DUSP6	[TAD2120_chr10],[Plus]	chr10:98,725,864-98,730,123	NM_026268	Dual specificity phosphatase 6, dual specificity protein phosphatase 6	negative regulation of protein phosphorylation (GO:0001933); phosphoprotein phosphatase activity (GO:0004721); protein tyrosine phosphatase activity (GO:0004725); protein binding (GO:0005515); cytoplasm (GO:0005737); protein dephosphorylation (GO:0006470); protein tyrosine/serine/threonine phosphatase activity (GO:0008138); dephosphorylation (GO:0016311); hydrolase activity (GO:0016787); phosphat…	Dusp6	RefSeq	0.55222	-1.81087	7.24079	3.85493	1.12352e-08	Female	class_II	IIB
ECHDC3	[TAD277_chr2],[Minus]	chr2:6,109,510-6,134,040	NM_024208	Enoyl Coenzyme A hydratase domain containing 3, enoyl-CoA hydratase domain-containing protein 3, mitochondrial precursor	molecular_function (GO:0003674); catalytic activity (GO:0003824); mitochondrion (GO:0005739); biological_process (GO:0008150); metabolic process (GO:0008152)	Echdc3	RefSeq	0.631268	-1.58411	31.4814	19.1728	1.05932e-09	Female	no_response	none
ECI3	[TAD2584_chr13],[Minus]	chr13:35,038,482-35,055,678	NM_026947			Eci3	RefSeq	0.0251967	-39.6878	4.02997	0.101	9.90305e-91	Female	class_I	IA
EIF2S3X	[TAD3553_chrX],[Minus]	chrX:91,434,047-91,457,990	NM_012010	Eukaryotic translation initiation factor 2, subunit 3, structural gene X-linked, eukaryotic translation initiation factor 2 subunit 3, X-linked	nucleotide binding (GO:0000166); molecular_function (GO:0003674); translation initiation factor activity (GO:0003743); GTPase activity (GO:0003924); GTP binding (GO:0005525); cellular_component (GO:0005575); obsolete GTP catabolic process (GO:0006184); translation (GO:0006412); biological_process (GO:0008150); positive regulation of translational initiation (GO:0045948)	Eif2s3x	RefSeq	0.632285	-1.58156	25.0405	15.2483	1.58671e-10	Female	no_response	none
EIF4E3	[TAD1315_chr6],[Minus]	chr6:99,575,130-99,616,765	NM_025829	Eukaryotic translation initiation factor 4E member 3, eukaryotic translation initiation factor 4E type 3	molecular_function (GO:0003674); RNA binding (GO:0003723); translation initiation factor activity (GO:0003743); cellular_component (GO:0005575); cytoplasm (GO:0005737); translation (GO:0006412); translational initiation (GO:0006413); regulation of translation (GO:0006417); biological_process (GO:0008150); positive regulation of translational initiation (GO:0045948)	Eif4e3	RefSeq	0.445502	-2.24466	2.10164	0.90521	7.54772e-07	Female	class_I	IA
ELF4	[TAD3532_chrX],[Minus]	chrX:45,764,225-45,816,309	NM_019680	E74-like factor 4 (ets domain transcription factor), ETS-related transcription factor Elf-4	natural killer cell proliferation (GO:0001787); NK T cell proliferation (GO:0001866); DNA binding (GO:0003677); DNA binding transcription factor activity (GO:0003700); calcium ion binding (GO:0005509); nucleus (GO:0005634); regulation of transcription, DNA-templated (GO:0006355); obsolete transcription activator activity (GO:0016563); sequence-specific DNA binding (GO:0043565); positive regulatio…	Elf4	RefSeq	0.615927	-1.62357	0.348939	0.208847	0.0264746	Female	no_response	none
EMP2	[TAD3016_chr16],[Minus]	chr16:10,281,841-10,314,061	NM_007929	Epithelial membrane protein 2, epithelial membrane protein 2	membrane (GO:0016020); integral component of membrane (GO:0016021)	Emp2	RefSeq	0.489235	-2.04401	2.04353	0.964178	3.94928e-13	Female	class_II	IIA
EMR1	[TAD3224_chr17],[Plus]	chr17:57,498,108-57,622,952	NM_010130	EGF-like module containing, mucin-like, hormone receptor-like sequence 1,	signal transducer activity (GO:0004871); transmembrane signaling receptor activity (GO:0004888); G-protein coupled receptor activity (GO:0004930); calcium ion binding (GO:0005509); extracellular space (GO:0005615); plasma membrane (GO:0005886); defense response (GO:0006952); signal transduction (GO:0007165); cell surface receptor signaling pathway (GO:0007166); G-protein coupled receptor signalin…	Emr1	RefSeq	0.645222	-1.54985	4.48242	2.78021	0.000259069	Female	no_response	none
EMR4	[TAD3219_chr17],[Plus]	chr17:55,889,248-55,992,927	NM_139138	EGF-like module containing, mucin-like, hormone receptor-like sequence 4,	signal transducer activity (GO:0004871); transmembrane signaling receptor activity (GO:0004888); G-protein coupled receptor activity (GO:0004930); calcium ion binding (GO:0005509); plasma membrane (GO:0005886); integral component of plasma membrane (GO:0005887); signal transduction (GO:0007165); cell surface receptor signaling pathway (GO:0007166); epidermal growth factor receptor signaling pathw…	Emr4	RefSeq	0.60046	-1.66539	2.00648	1.15285	0.000655778	Female	no_response	none
ENPP1	[TAD2006_chr10],[Minus]	chr10:24,361,216-24,431,908	NM_008813	Ectonucleotide pyrophosphatase/phosphodiesterase 1, ectonucleotide pyrophosphatase/phosphodiesterase family member 1 isoform 2;ectonucleotide pyrophosphatase/phosphodiesterase family member 1 isoform 3;ectonucleotide pyrophosphatase/phosphodiesterase family member 1 isoform 1	nucleic acid binding (GO:0003676); catalytic activity (GO:0003824); endonuclease activity (GO:0004519); phosphodiesterase I activity (GO:0004528); nucleotide diphosphatase activity (GO:0004551); scavenger receptor activity (GO:0005044); extracellular space (GO:0005615); plasma membrane (GO:0005886); immune response (GO:0006955); signal transduction (GO:0007165); metabolic process (GO:0008152); nu…	Enpp1	RefSeq	0.62313	-1.6048	3.668	2.19789	8.05745e-07	Female	no_response	none
ESR1	[TAD1972_chr10],[Minus],[Overlapping_Isoform_Count: 5]	chr10:5,453,457-5,734,552 chr10:5,379,204-5,636,383 chr10:5,340,907-5,734,552 chr10:5,340,907-5,636,383	NM_007956 NM_001302531 NM_001302532 NM_001302533 NR_126357	Estrogen receptor 1 (alpha), estrogen receptor isoform 1;estrogen receptor isoform 2	antral ovarian follicle growth (GO:0001547); epithelial cell development (GO:0002064); DNA binding (GO:0003677); DNA binding transcription factor activity (GO:0003700); steroid hormone receptor activity (GO:0003707); nuclear receptor activity (GO:0004879); steroid binding (GO:0005496); protein binding (GO:0005515); nucleus (GO:0005634); cytoplasm (GO:0005737); plasma membrane (GO:0005886); regula…	Esr1	RefSeq	0.546529	-1.82973	4.68367	2.46327	4.94736e-13	Female	class_I	IB
ESRRG	[TAD254_chr1],[Plus],[Overlapping_Isoform_Count: 2]	chr1:189,821,705-190,038,763 chr1:189,432,884-190,038,763	NM_011935 NM_001243792	Estrogen-related receptor gamma, estrogen-related receptor gamma isoform1;estrogen-related receptor gamma isoform 2	DNA binding (GO:0003677); DNA binding transcription factor activity (GO:0003700); steroid hormone receptor activity (GO:0003707); nuclear receptor activity (GO:0004879); steroid binding (GO:0005496); calmodulin binding (GO:0005516); nucleus (GO:0005634); regulation of transcription, DNA-templated (GO:0006355); signal transduction (GO:0007165); multicellular organism development (GO:0007275); zinc…	Esrrg	RefSeq	0.430724	-2.32167	0.376145	0.156876	0.000164806	Female	no_response	none
EVC	[TAD1009_chr5],[Minus]	chr5:37,690,409-37,728,120	NM_021292	Ellis van Creveld gene homolog (human), ellis-van Creveld syndrome protein homolog	membrane (GO:0016020); integral component of membrane (GO:0016021)	Evc	RefSeq	0.380758	-2.62634	1.20795	0.442901	4.40546e-17	Female	no_response	none
EVC2	[TAD1009_chr5],[Plus]	chr5:37,729,716-37,816,293	NM_145920	Ellis van Creveld syndrome 2 homolog (human), limbin precursor	membrane (GO:0016020); integral component of membrane (GO:0016021)	Evc2	RefSeq	0.390327	-2.56195	0.695217	0.262291	1.2279e-06	Female	no_response	none
EVI2A	[TAD2290_chr11],[Minus],[Overlapping_Isoform_Count: 2],[Overlaps with:Gm21975],[Multi-counted reads: -, -, Intron-only_counting]	chr11:79,340,062-79,344,111	NM_010161 NM_001033711	Ecotropic viral integration site 2a, protein EVI2A precursor	extracellular space (GO:0005615); membrane (GO:0016020); integral component of membrane (GO:0016021)	Evi2a	RefSeq	0.555923	-1.79881	0.50048	0.263293	0.0269265	Female	no_response	none
F630028O10RIK	[TAD3557_chrX],[Plus],[Overlaps with:Mir223]	chrX:93,435,264-93,438,981	NR_030718	RIKEN cDNA F630028O10 gene,	molecular_function (GO:0003674); cellular_component (GO:0005575); biological_process (GO:0008150)	F630028O10Rik	RefSeq	0.614454	-1.62746	0.417339	0.241056	0.0482571	Female	no_response	none
FABP7	[TAD2052_chr10],[Plus]	chr10:57,504,728-57,508,256	NM_021272	Fatty acid binding protein 7, brain, fatty acid-binding protein, brain	startle response (GO:0001964); transporter activity (GO:0005215); binding (GO:0005488); nucleus (GO:0005634); cytoplasm (GO:0005737); transport (GO:0006810); lipid binding (GO:0008289); cell proliferation in forebrain (GO:0021846); neurogenesis (GO:0022008); cell projection (GO:0042995); neuronal cell body (GO:0043025); epithelial cell proliferation (GO:0050673); prepulse inhibition (GO:0060134)	Fabp7	RefSeq	0.641588	-1.55863	3.0955	1.91512	0.0260666	Female	no_response	none
FAM126A	[TAD991_chr5],[Minus]	chr5:23,466,753-23,536,501	NM_053090	Family with sequence similarity 126, member A, hyccin isoform 2;hyccin isoform 1	molecular_function (GO:0003674); cytoplasm (GO:0005737); biological_process (GO:0008150); membrane (GO:0016020)	Fam126a	RefSeq	0.530772	-1.88405	1.75321	0.891423	7.31881e-12	Female	no_response	none
FAM49A	[TAD2389_chr12],[Plus],[Overlapping_Isoform_Count: 2]	chr12:12,268,944-12,383,167	NM_029758 NM_001146119	Family with sequence similarity 49, member A, protein FAM49A	molecular_function (GO:0003674); cellular_component (GO:0005575); biological_process (GO:0008150)	Fam49a	RefSeq	0.508982	-1.96471	0.842312	0.409575	0.000734755	Female	no_response	none
FAM84B	[TAD2939_chr15],[Minus]	chr15:60,650,550-60,656,635	NM_001162926	Family with sequence similarity 84, member B, protein FAM84B	molecular_function (GO:0003674); cellular_component (GO:0005575); biological_process (GO:0008150)	Fam84b	RefSeq	0.303956	-3.28995	4.47124	1.31569	1.4735e-46	Female	class_I	IB
FAM89A	[TAD1759_chr8],[Minus]	chr8:127,264,156-127,275,709	NM_001081120	Family with sequence similarity 89, member A, protein FAM89A	molecular_function (GO:0003674); cellular_component (GO:0005575); biological_process (GO:0008150)	Fam89a	RefSeq	0.560829	-1.78307	3.68448	1.9905	0.000343791	Female	class_I	IB
FANCC	[TAD2638_chr13],[Minus],[Overlapping_Isoform_Count: 3]	chr13:63,412,844-63,533,053 chr13:63,406,016-63,533,053	NM_001042673 NM_007985 NM_001282942	Fanconi anemia, complementation group C, Fanconi anemia group C protein homolog isoform 1;Fanconi anemia group C protein homolog isoform 2	chromatin (GO:0000785); myeloid cell homeostasis (GO:0002262); nucleus (GO:0005634); cytoplasm (GO:0005737); DNA repair (GO:0006281); nucleotide-excision repair (GO:0006289); cellular response to DNA damage stimulus (GO:0006974); gamete generation (GO:0007276); germ cell development (GO:0007281); removal of superoxide radicals (GO:0019430)	Fancc	RefSeq	0.535693	-1.86674	0.503424	0.259335	0.000294388	Female	no_response	none
FAR1	[TAD1540_chr7],[Plus],[Overlapping_Isoform_Count: 2]	chr7:120,657,347-120,714,402	NM_027379 NM_001285831	fatty acyl CoA reductase 1, fatty acyl-CoA reductase 1 isoform 1;fatty acyl-CoA reductase 1 isoform 2	catalytic activity (GO:0003824); binding (GO:0005488); peroxisome (GO:0005777); lipid metabolic process (GO:0006629); metabolic process (GO:0008152); lipid biosynthetic process (GO:0008610); wax biosynthetic process (GO:0010025); membrane (GO:0016020); integral component of membrane (GO:0016021); oxidoreductase activity (GO:0016491); long-chain-fatty-acyl-CoA reductase activity (GO:0050062); oxid…	Far1	RefSeq	0.646997	-1.5456	0.772042	0.477572	0.0183615	Female	no_response	none
FBXL21	[TAD2627_chr13],[Plus]	chr13:56,623,868-56,639,147	NM_178674	F-box and leucine-rich repeat protein 21, F-box/LRR-repeat protein 21	molecular_function (GO:0003674); cellular_component (GO:0005575); obsolete ubiquitin cycle (GO:0006512); biological_process (GO:0008150)	Fbxl21	RefSeq	0.46655	-2.14339	2.27217	1.01095	5.06737e-11	Female	no_response	none
FCER1G	[TAD220_chr1],[Minus]	chr1:173,159,702-173,164,480	NM_010185	Fc receptor, IgE, high affinity I, gamma polypeptide, high affinity immunoglobulin epsilon receptor subunit gamma precursor	positive regulation of type IIa hypersensitivity (GO:0001798); positive regulation of type III hypersensitivity (GO:0001805); positive regulation of type I hypersensitivity (GO:0001812); Fc receptor mediated stimulatory signaling pathway (GO:0002431); transmembrane signaling receptor activity (GO:0004888); protein binding (GO:0005515); plasma membrane (GO:0005886); integral component of plasma me…	Fcer1g	RefSeq	0.663835	-1.5064	5.3736	3.42674	0.0392759	Female	no_response	none
FGD2	[TAD3181_chr17],[Plus],[Overlapping_Isoform_Count: 2]	chr17:29,497,858-29,516,480	NM_013710 NM_001159538	FYVE, RhoGEF and PH domain containing 2, FYVE, RhoGEF and PH domain-containing protein 2 isoform 1;FYVE, RhoGEF and PH domain-containing protein 2 isoform 2	guanyl-nucleotide exchange factor activity (GO:0005085); Rho guanyl-nucleotide exchange factor activity (GO:0005089); intracellular (GO:0005622); nucleus (GO:0005634); cytoplasm (GO:0005737); endosome (GO:0005768); cytoskeleton (GO:0005856); plasma membrane (GO:0005886); zinc ion binding (GO:0008270); membrane (GO:0016020); regulation of Rho protein signal transduction (GO:0035023); cell projecti…	Fgd2	RefSeq	0.63039	-1.58632	1.01497	0.614556	0.0359005	Female	no_response	none
FIBIN	[TAD425_chr2],[Minus]	chr2:110,201,081-110,203,150	NM_026271	Fin bud initiation factor homolog (zebrafish), fin bud initiation factor homolog precursor	molecular_function (GO:0003674); cellular_component (GO:0005575); extracellular region (GO:0005576); Golgi apparatus (GO:0005794); biological_process (GO:0008150)	Fibin	RefSeq	0.306888	-3.25852	0.437542	0.129094	2.52253e-06	Female	no_response	none
FIGN	[TAD353_chr2],[Minus],[Overlapping_Isoform_Count: 3]	chr2:63,809,564-63,936,095	NM_021716 NM_001267846 NM_001267847	Fidgetin, fidgetin isoform 2;fidgetin isoform 1	nucleotide binding (GO:0000166); ATP binding (GO:0005524); nucleus (GO:0005634); protein C-terminus binding (GO:0008022); nuclear matrix (GO:0016363); nucleoside-triphosphatase activity (GO:0017111)	Fign	RefSeq	0.596234	-1.67719	0.526599	0.298329	0.000750169	Female	class_II	IIA
FMN1	[TAD428_chr2;TAD429_chr2],[Plus],[Overlapping_Isoform_Count: 5]	chr2:113,525,246-113,556,924 chr2:113,281,220-113,556,924 chr2:113,167,892-113,556,924	NM_010230 NM_001285458 NM_001285459 NM_001287817 NM_001287818	Formin 1, formin-1 isoform 4;formin-1 isoform 1;formin-1 isoform 3;formin-1 isoform 5	DNA binding (GO:0003677); actin binding (GO:0003779); carbohydrate:proton symporter activity (GO:0005351); protein binding (GO:0005515); nucleus (GO:0005634); cytoplasm (GO:0005737); cytoskeleton (GO:0005856); plasma membrane (GO:0005886); adherens junction (GO:0005912); multicellular organism development (GO:0007275); phosphoenolpyruvate-dependent sugar phosphotransferase system (GO:0009401); ge…	Fmn1	RefSeq	0.56395	-1.77321	0.272892	0.148767	0.000185997	Female	class_I	IA
FMO1	[TAD206_chr1],[Minus]	chr1:164,759,691-164,796,679	NM_010231	Flavin containing monooxygenase 1, dimethylaniline monooxygenase [N-oxide-forming] 1	monooxygenase activity (GO:0004497); N,N-dimethylaniline monooxygenase activity (GO:0004499); transporter activity (GO:0005215); extracellular space (GO:0005615); endoplasmic reticulum (GO:0005783); obsolete microsome (GO:0005792); obsolete electron transport (GO:0006118); transport (GO:0006810); disulfide oxidoreductase activity (GO:0015036); membrane (GO:0016020); integral component of membrane…	Fmo1	RefSeq	0.408511	-2.44791	88.0779	34.7045	2.53089e-40	Female	class_I	IA
FMO2	[TAD206_chr1],[Minus]	chr1:164,805,177-164,828,843	NM_018881	Flavin containing monooxygenase 2, dimethylaniline monooxygenase [N-oxide-forming] 2	magnesium ion binding (GO:0000287); monooxygenase activity (GO:0004497); N,N-dimethylaniline monooxygenase activity (GO:0004499); cellular_component (GO:0005575); extracellular space (GO:0005615); endoplasmic reticulum (GO:0005783); obsolete microsome (GO:0005792); obsolete electron transport (GO:0006118); obsolete oxygen and reactive oxygen species metabolic process (GO:0006800); membrane (GO:00…	Fmo2	RefSeq	0.255427	-3.91501	4.04897	0.99626	1.73579e-32	Female	class_II	IIA
FMO3	[TAD206_chr1],[Minus]	chr1:164,883,930-164,914,622	NM_008030	Flavin containing monooxygenase 3, dimethylaniline monooxygenase [N-oxide-forming] 3	monooxygenase activity (GO:0004497); N,N-dimethylaniline monooxygenase activity (GO:0004499); extracellular space (GO:0005615); endoplasmic reticulum (GO:0005783); obsolete microsome (GO:0005792); obsolete electron transport (GO:0006118); disulfide oxidoreductase activity (GO:0015036); membrane (GO:0016020); integral component of membrane (GO:0016021); oxidoreductase activity (GO:0016491); amino …	Fmo3	RefSeq	0.00552517	-180.99	115.64	0.620898	0	Female	class_I	IA
FMO4	[TAD206_chr1],[Minus]	chr1:164,724,013-164,742,680	NM_144878	Flavin containing monooxygenase 4, dimethylaniline monooxygenase [N-oxide-forming] 4	molecular_function (GO:0003674); monooxygenase activity (GO:0004497); N,N-dimethylaniline monooxygenase activity (GO:0004499); cellular_component (GO:0005575); endoplasmic reticulum (GO:0005783); obsolete microsome (GO:0005792); obsolete electron transport (GO:0006118); biological_process (GO:0008150); membrane (GO:0016020); integral component of membrane (GO:0016021); oxidoreductase activity (GO…	Fmo4	RefSeq	0.547363	-1.82694	5.19278	2.74365	1.53621e-10	Female	no_response	none
FOLR2	[TAD1522_chr7],[Minus],[Overlapping_Isoform_Count: 3]	chr7:108,988,501-109,005,704 chr7:108,988,501-108,993,845	NM_008035 NM_001303231 NM_001303239	Folate receptor 2 (fetal), folate receptor beta precursor	folic acid binding (GO:0005542); extracellular space (GO:0005615); obsolete membrane fraction (GO:0005624); plasma membrane (GO:0005886); posttranslational protein targeting to endoplasmic reticulum membrane (GO:0006620); signal transduction (GO:0007165); folic acid transmembrane transporter activity (GO:0008517); folic acid transport (GO:0015884); membrane (GO:0016020); anchored component of mem…	Folr2	RefSeq	0.606764	-1.64809	4.30599	2.5339	0.000126726	Female	class_I	IA
FPR1	[TAD3164_chr17],[Minus]	chr17:18,013,434-18,020,903	NM_013521	Formyl peptide receptor 1, fMet-Leu-Phe receptor	obsolete rhodopsin-like receptor activity (GO:0001584); signal transducer activity (GO:0004871); G-protein coupled receptor activity (GO:0004930); N-formyl peptide receptor activity (GO:0004982); plasma membrane (GO:0005886); chemotaxis (GO:0006935); signal transduction (GO:0007165); G-protein coupled receptor signaling pathway (GO:0007186); sensory perception (GO:0007600); membrane (GO:0016020);…	Fpr1	RefSeq	0.37327	-2.67902	2.11673	0.749308	0.000667241	Female	no_response	none
FPR2	[TAD3164_chr17],[Plus]	chr17:18,024,787-18,030,916	NM_008039	Formyl peptide receptor 2, formyl peptide receptor 2	signal transducer activity (GO:0004871); G-protein coupled receptor activity (GO:0004930); N-formyl peptide receptor activity (GO:0004982); plasma membrane (GO:0005886); chemotaxis (GO:0006935); signal transduction (GO:0007165); G-protein coupled receptor signaling pathway (GO:0007186); membrane (GO:0016020); integral component of membrane (GO:0016021)	Fpr2	RefSeq	0.361699	-2.76473	1.34704	0.460632	0.0223479	Female	no_response	none
FUT8	[TAD2473_chr12],[Plus],[Overlapping_Isoform_Count: 5]	chr12:78,339,725-78,576,983 chr12:78,511,127-78,576,983 chr12:78,489,850-78,576,983 chr12:78,339,090-78,576,983	NM_016893 NM_001252614 NR_045554 NM_001252615 NM_001252616	Fucosyltransferase 8, alpha-(1,6)-fucosyltransferase isoform 2;alpha-(1,6)-fucosyltransferase isoform 1;alpha-(1,6)-fucosyltransferase isoform 3	extracellular space (GO:0005615); Golgi apparatus (GO:0005794); transforming growth factor beta receptor signaling pathway (GO:0007179); integrin-mediated signaling pathway (GO:0007229); respiratory gaseous exchange (GO:0007585); glycoprotein 6-alpha-L-fucosyltransferase activity (GO:0008424); membrane (GO:0016020); integral component of membrane (GO:0016021); cell migration (GO:0016477); transfe…	Fut8	RefSeq	0.542152	-1.8445	1.47064	0.763978	3.64929e-08	Female	no_response	none
FYB	[TAD2871_chr15],[Plus],[Overlapping_Isoform_Count: 2]	chr15:6,529,846-6,615,608	NM_011815 NM_001278269	FYN binding protein, FYN-binding protein isoform 2;FYN-binding protein isoform 1	nucleus (GO:0005634); cytoplasm (GO:0005737); mast cell activation (GO:0045576)	Fyb	RefSeq	0.600424	-1.66549	1.80075	1.0414	0.000191993	Female	no_response	none
G6PDX	[TAD3547_chrX],[Minus]	chrX:71,654,824-71,674,500	NM_008062	Glucose-6-phosphate dehydrogenase X-linked, glucose-6-phosphate 1-dehydrogenase X	cytokine production (GO:0001816); angiotensin-mediated vasoconstriction involved in regulation of systemic arterial blood pressure (GO:0001998); angiotensin-mediated vasodilation involved in regulation of systemic arterial blood pressure (GO:0002033); catalytic activity (GO:0003824); glucose-6-phosphate dehydrogenase activity (GO:0004345); binding (GO:0005488); glucose binding (GO:0005536); obsol…	G6pdx	RefSeq	0.629397	-1.58882	1.39674	0.842087	0.00266334	Female	no_response	none
GADD45B	[TAD2089_chr10],[Plus]	chr10:80,392,835-80,394,949	NM_008655	Growth arrest and DNA-damage-inducible 45 beta, growth arrest and DNA damage-inducible protein GADD45 beta	activation of MAPKK activity (GO:0000186); protein binding (GO:0005515); nucleus (GO:0005634); negative regulation of protein kinase activity (GO:0006469); apoptotic process (GO:0006915); multicellular organism development (GO:0007275); cell differentiation (GO:0030154); regulation of cell cycle (GO:0051726)	Gadd45b	RefSeq	0.373785	-2.67533	0.886314	0.317807	0.00082054	Female	class_II	IIB
GAS1	[TAD2633_chr13],[Minus]	chr13:60,275,765-60,278,896	NM_008086	Growth arrest specific 1, growth arrest-specific protein 1	positive regulation of mesenchymal cell proliferation (GO:0002053); protein binding (GO:0005515); plasma membrane (GO:0005886); cell cycle (GO:0007049); cell cycle arrest (GO:0007050); axon guidance (GO:0007411); positive regulation of cell proliferation (GO:0008284); dorsal/ventral pattern formation (GO:0009953); programmed cell death (GO:0012501); membrane (GO:0016020); cerebellum morphogenesis…	Gas1	RefSeq	0.596047	-1.67772	2.32063	1.32436	0.00228859	Female	class_II	IIB
GAS6	[TAD1610_chr8],[Minus]	chr8:13,465,373-13,494,535	NM_019521	Growth arrest specific 6, growth arrest-specific protein 6 precursor	regulation of cell growth (GO:0001558); structural molecule activity (GO:0005198); calcium ion binding (GO:0005509); extracellular region (GO:0005576); extracellular space (GO:0005615); cell adhesion (GO:0007155); cellular response to starvation (GO:0009267); regulation of growth (GO:0040008); metal ion binding (GO:0046872); cellular response to growth factor stimulus (GO:0071363)	Gas6	RefSeq	0.618236	-1.6175	17.349	10.313	1.51652e-05	Female	no_response	none
GBP10	[TAD1085_chr5],[Minus]	chr5:105,644,717-105,668,552	NM_001039646	guanylate-binding protein 10, guanylate-binding protein 10		Gbp10	RefSeq	0.352695	-2.83531	6.39464	2.1738	5.14001e-08	Female	class_I	IA
GBP2	[TAD745_chr3],[Plus]	chr3:142,283,626-142,300,972	NM_010260	Guanylate binding protein 2, guanylate-binding protein 1	GTPase activity (GO:0003924); GTP binding (GO:0005525); immune response (GO:0006955)	Gbp2	RefSeq	0.333609	-2.99752	3.92206	1.25634	0.000136102	Female	class_II	IIA
GBP3	[TAD745_chr3],[Plus],[Overlapping_Isoform_Count: 3]	chr3:142,223,459-142,236,176 chr3:142,223,015-142,236,176	NM_018734 NM_001289492 NM_001289493	guanylate binding protein 3, guanylate-binding protein 4	nucleotide binding (GO:0000166); GTPase activity (GO:0003924); GTP binding (GO:0005525); cytoplasm (GO:0005737); cytosol (GO:0005829); obsolete GTP catabolic process (GO:0006184)	Gbp3	RefSeq	0.270014	-3.70351	2.49277	0.646285	1.15209e-07	Female	class_I	IA
GBP4	[TAD1085_chr5],[Minus],[Overlapping_Isoform_Count: 2]	chr5:105,544,785-105,568,571 chr5:105,544,785-105,568,605	NM_008620 NM_001256005	guanylate binding protein 4, macrophage activation 2 isoform 2;macrophage activation 2 isoform 1	GTPase activity (GO:0003924); GTP binding (GO:0005525); immune response (GO:0006955)	Gbp4	RefSeq	0.419496	-2.38381	2.06866	0.836102	0.0116923	Female	no_response	none
GBP5	[TAD745_chr3],[Plus]	chr3:142,159,897-142,185,308	NM_153564	guanylate binding protein 5, guanylate-binding protein 5	GTPase activity (GO:0003924); GTP binding (GO:0005525); immune response (GO:0006955)	Gbp5	RefSeq	0.260324	-3.84136	1.18251	0.293151	0.00697522	Female	class_II	IIA
GBP6	[TAD1085_chr5],[Minus]	chr5:105,699,720-105,722,718	NM_194336	Guanylate binding protein 6, guanylate binding protein 6	GTPase activity (GO:0003924); GTP binding (GO:0005525); immune response (GO:0006955)	Gbp6	RefSeq	0.415019	-2.40953	4.66705	1.8639	0.000602081	Female	class_I	IA
GBP7	[TAD745_chr3],[Plus],[Overlapping_Isoform_Count: 2]	chr3:142,193,299-142,213,115	NM_145545 NM_001083312			Gbp7	RefSeq	0.331589	-3.01578	4.45246	1.41989	7.84328e-09	Female	no_response	none
GBP8	[TAD1085_chr5],[Minus]	chr5:105,443,171-105,482,580	NM_029509	Guanylate-binding protein 8, guanylate binding protein 8	molecular_function (GO:0003674); cellular_component (GO:0005575); biological_process (GO:0008150)	Gbp8	RefSeq	0.461116	-2.16865	1.53715	0.67929	0.025629	Female	class_I	IA
GIMAP8	[TAD1228_chr6],[Plus],[Overlapping_Isoform_Count: 3]	chr6:48,597,359-48,610,874 chr6:48,597,359-48,610,872 chr6:48,597,232-48,610,874	NM_212486 NM_001077410 NM_001286629	GTPase, IMAP family member 8, GTPase IMAP family member 8 isoform 2;GTPase IMAP family member 8 isoform 1	nucleotide binding (GO:0000166); molecular_function (GO:0003674); GTP binding (GO:0005525); cellular_component (GO:0005575); mitochondrion (GO:0005739); endoplasmic reticulum (GO:0005783); Golgi apparatus (GO:0005794); biological_process (GO:0008150)	Gimap8	RefSeq	0.660513	-1.51397	1.17142	0.742346	0.000589073	Female	class_II	IIA
GM11437	[TAD2302_chr11],[Minus]	chr11:83,961,864-83,980,978	NM_001037932	predicted gene 11437, uncharacterized protein C17orf78 homolog	molecular_function (GO:0003674); cellular_component (GO:0005575); biological_process (GO:0008150); membrane (GO:0016020); integral component of membrane (GO:0016021)	Gm11437	RefSeq	0.604164	-1.65518	3.43123	1.97856	5.32982e-05	Female	class_I	IA
GM12250	[TAD2243_chr11],[Plus]	chr11:57,997,344-58,003,700	NM_001135115	Predicted gene 12250, predicted gene 12250		Gm12250	RefSeq	0.29377	-3.40402	3.02246	0.85473	0.00165104	Female	class_I	IA
GM20752	[TAD767_chr3end],[Plus]	chr3:158,739,327-158,971,044	NR_040750			Gm20752	RefSeq	0.61204	-1.63388	6.21727	3.66447	2.28189e-06	Female	class_II	IIB
GM3219	[TAD2764_chr14],[Plus]	chr14:35,158,240-35,158,844	NR_027380	B-cell CLL/lymphoma 7C pseudogene,		Gm3219	RefSeq	0.627485	-1.59366	11.5085	6.92306	0.0202585	Female	class_I	IB
GM4477	[TAD1287_chr6],[Minus]	chr6:85,656,700-85,658,555	NM_001253910			Gm4477	RefSeq	0.429145	-2.33021	3.7374	1.56108	6.30665e-09	Female	class_I	IB
GM4794	[TAD2018_chr10],[Minus]	chr10:33,486,229-33,501,921	NM_001101452	Predicted gene 4794, uncharacterized protein LOC215895	molecular_function (GO:0003674); cellular_component (GO:0005575); biological_process (GO:0008150)	Gm4794	RefSeq	0.000601607	-1662.22	96.5155	0.0498859	4.40231e-299	Female	class_I	IA
GM4841	[TAD3353_chr18],[Minus]	chr18:60,427,954-60,432,921	NM_001034859	predicted gene 4841, interferon-inducible GTPase-like	molecular_function (GO:0003674); cellular_component (GO:0005575); biological_process (GO:0008150)	Gm4841	RefSeq	0.0949068	-10.5366	2.28691	0.206773	0.00140412	Female	class_II	IIA
GM7609	[TAD103_chr1],[Plus]	chr1:85,196,185-85,210,337	NM_001081746	predicted pseudogene 7609, component of Sp100-rs-like		Gm7609	RefSeq	0.473227	-2.11315	1.0393	0.465393	0.000134062	Female	no_response	none
GOLT1A	[TAD153_chr1],[Plus]	chr1:135,206,399-135,219,603	NM_026680	Golgi transport 1 homolog A (S. cerevisiae), vesicle transport protein GOT1A	molecular_function (GO:0003674); cellular_component (GO:0005575); biological_process (GO:0008150); integral component of membrane (GO:0016021)	Golt1a	RefSeq	0.650623	-1.53699	3.19088	1.99043	7.35128e-05	Female	no_response	none
GOT1	[TAD3486_chr19],[Minus]	chr19:43,574,242-43,599,095	NM_010324	Glutamate oxaloacetate transaminase 1, soluble, aspartate aminotransferase, cytoplasmic	catalytic activity (GO:0003824); L-aspartate:2-oxoglutarate aminotransferase activity (GO:0004069); phosphatidylserine decarboxylase activity (GO:0004609); obsolete soluble fraction (GO:0005625); cytoplasm (GO:0005737); lysosome (GO:0005764); cytosol (GO:0005829); oxaloacetate metabolic process (GO:0006107); glycerol biosynthetic process (GO:0006114); cellular amino acid metabolic process (GO:000…	Got1	RefSeq	0.397491	-2.51578	75.226	28.8405	2.8328e-30	Female	no_response	none
GPR65	[TAD2502_chr12],[Plus]	chr12:99,506,844-99,514,932	NM_008152	G-protein coupled receptor 65, psychosine receptor	obsolete rhodopsin-like receptor activity (GO:0001584); signal transducer activity (GO:0004871); G-protein coupled receptor activity (GO:0004930); plasma membrane (GO:0005886); integral component of plasma membrane (GO:0005887); apoptotic process (GO:0006915); signal transduction (GO:0007165); G-protein coupled receptor signaling pathway (GO:0007186); membrane (GO:0016020); integral component of …	Gpr65	RefSeq	0.554254	-1.80423	0.652251	0.335431	0.0245275	Female	no_response	none
GPSM1	[TAD304_chr2],[Plus],[Overlapping_Isoform_Count: 3]	chr2:26,175,289-26,203,757 chr2:26,171,052-26,203,757	NM_153410 NM_001199146 NM_001199147	G-protein signalling modulator 1 (AGS3-like, C. elegans), G-protein-signaling modulator 1 isoform 2;G-protein-signaling modulator 1 isoform 3;G-protein-signaling modulator 1 isoform 1	GTPase activator activity (GO:0005096); binding (GO:0005488); cytoplasm (GO:0005737); endoplasmic reticulum (GO:0005783); Golgi apparatus (GO:0005794); plasma membrane (GO:0005886); signal transduction (GO:0007165); multicellular organism development (GO:0007275); nervous system development (GO:0007399); regulation of G-protein coupled receptor protein signaling pathway (GO:0008277); membrane (GO…	Gpsm1	RefSeq	0.563513	-1.77458	0.267873	0.14449	0.0290252	Female	no_response	none
GPX7	[TAD895_chr4],[Minus]	chr4:108,072,821-108,079,318	NM_024198	Glutathione peroxidase 7, glutathione peroxidase 7 precursor	peroxidase activity (GO:0004601); glutathione peroxidase activity (GO:0004602); extracellular region (GO:0005576); extracellular space (GO:0005615); response to oxidative stress (GO:0006979); oxidoreductase activity (GO:0016491); oxidation-reduction process (GO:0055114)	Gpx7	RefSeq	0.581089	-1.72091	1.07149	0.599992	0.0265888	Female	no_response	none
GRID1	[TAD2767_chr14],[Plus],[Overlaps with:Mir346]	chr14:35,633,321-36,394,301	NM_008166	Glutamate receptor, ionotropic, delta 1, glutamate receptor ionotropic, delta-1 precursor	ionotropic glutamate receptor activity (GO:0004970); transporter activity (GO:0005215); ion channel activity (GO:0005216); extracellularly glutamate-gated ion channel activity (GO:0005234); protein binding (GO:0005515); plasma membrane (GO:0005886); transport (GO:0006810); ion transport (GO:0006811); signal transduction (GO:0007165); chemical synaptic transmission (GO:0007268); membrane (GO:00160…	Grid1	RefSeq	0.158583	-6.30586	0.254713	0.0405536	8.35278e-09	Female	no_response	none
GSTO2	[TAD3495_chr19],[Plus],[Overlapping_Isoform_Count: 2]	chr19:47,940,034-47,960,795 chr19:47,940,283-47,960,795	NM_026619 NM_030051	Glutathione S-transferase omega 2, glutathione S-transferase omega-2	molecular_function (GO:0003674); glutathione transferase activity (GO:0004364); cellular_component (GO:0005575); cytoplasm (GO:0005737); biological_process (GO:0008150); metabolic process (GO:0008152); transferase activity (GO:0016740)	Gsto2	RefSeq	0.241674	-4.1378	0.397697	0.0941023	3.34776e-05	Female	no_response	none
GSTT1	[TAD2080_chr10],[Minus]	chr10:75,246,557-75,261,329	NM_008185	Glutathione S-transferase, theta 1, glutathione S-transferase theta-1	glutathione transferase activity (GO:0004364); glutathione peroxidase activity (GO:0004602); nucleus (GO:0005634); cytoplasm (GO:0005737); cytosol (GO:0005829); glutathione metabolic process (GO:0006749); transferase activity (GO:0016740)	Gstt1	RefSeq	0.581147	-1.72073	94.0438	52.7339	2.75788e-10	Female	class_II	IIA
GSTT3	[TAD2080_chr10],[Minus]	chr10:75,236,866-75,244,159	NM_133994	Glutathione S-transferase, theta 3, glutathione S-transferase, theta 3	glutathione transferase activity (GO:0004364); cellular_component (GO:0005575); glutathione metabolic process (GO:0006749); transferase activity (GO:0016740)	Gstt3	RefSeq	0.210617	-4.74795	34.9409	7.07455	2.41414e-57	Female	class_II	IIA
GYPC	[TAD3307_chr18],[Minus]	chr18:32,687,973-32,719,688	NM_001048207	Glycophorin C, glycophorin-C	molecular_function (GO:0003674); plasma membrane (GO:0005886); biological_process (GO:0008150); membrane (GO:0016020); integral component of membrane (GO:0016021); cortical cytoskeleton (GO:0030863)	Gypc	RefSeq	0.548494	-1.82317	3.9067	2.0759	4.31816e-09	Female	class_II	IIA
GZMB	[TAD2788_chr14],[Minus]	chr14:56,877,694-56,881,097	NM_013542	Granzyme B, granzyme B(G,H) precursor	T cell mediated cytotoxicity (GO:0001913); catalytic activity (GO:0003824); serine-type endopeptidase activity (GO:0004252); obsolete chymotrypsin activity (GO:0004263); obsolete granzyme B activity (GO:0004278); obsolete trypsin activity (GO:0004295); protein binding (GO:0005515); extracellular space (GO:0005615); cytoplasm (GO:0005737); proteolysis (GO:0006508); apoptotic process (GO:0006915); …	Gzmb	RefSeq	0.260378	-3.84056	0.401796	0.105014	0.00651611	Female	no_response	none
H2-AA	[TAD3193_chr17],[Minus]	chr17:34,419,695-34,424,716	NM_010378	Histocompatibility 2, class II antigen A, alpha, histocompatibility 2, class II antigen A, alpha precursor	antigen processing and presentation of peptide or polysaccharide antigen via MHC class II (GO:0002504); protein binding (GO:0005515); lysosome (GO:0005764); plasma membrane (GO:0005886); immune response (GO:0006955); external side of plasma membrane (GO:0009897); membrane (GO:0016020); integral component of membrane (GO:0016021); antigen processing and presentation (GO:0019882); antigen processin…	H2-Aa	RefSeq	0.504126	-1.98363	5.13878	2.48807	0.0119022	Female	class_II	IIB
H2-AB1	[TAD3193_chr17],[Plus]	chr17:34,400,171-34,406,363	NM_207105	Histocompatibility 2, class II antigen A, beta 1, histocompatibility 2, class II antigen A, beta 1 precursor	antigen processing and presentation of peptide or polysaccharide antigen via MHC class II (GO:0002504); protein binding (GO:0005515); intracellular (GO:0005622); early endosome (GO:0005769); multivesicular body (GO:0005771); Golgi apparatus (GO:0005794); plasma membrane (GO:0005886); defense response (GO:0006952); immune response (GO:0006955); external side of plasma membrane (GO:0009897); membra…	H2-Ab1	RefSeq	0.4387	-2.27946	6.33541	2.67498	0.0370284	Female	class_II	IIA
H2-DMB1	[TAD3193_chr17],[Plus]	chr17:34,290,135-34,297,174	NM_010387	Histocompatibility 2, class II, locus Mb1, class II histocompatibility antigen, M beta 1 chain precursor	antigen processing and presentation of peptide or polysaccharide antigen via MHC class II (GO:0002504); lysosome (GO:0005764); endosome (GO:0005768); immune response (GO:0006955); membrane (GO:0016020); integral component of membrane (GO:0016021); antigen processing and presentation (GO:0019882); antigen processing and presentation of exogenous peptide antigen via MHC class II (GO:0019886); MHC c…	H2-DMb1	RefSeq	0.446169	-2.2413	1.0826	0.463523	0.0284261	Female	no_response	none
H2-EA-PS	[TAD3193_chr17],[Minus]	chr17:34,479,156-34,481,590	NM_010381	histocompatibility 2, class II antigen E alpha, pseudogene, histocompatibility 2, class II antigen E alpha precursor		H2-Ea-ps	RefSeq	0.469556	-2.12967	6.1484	2.80827	0.0283176	Female	class_II	IIA
H2-EB1	[TAD3193_chr17],[Plus]	chr17:34,442,811-34,453,619	NM_010382	Histocompatibility 2, class II antigen E beta, H-2 class II histocompatibility antigen, I-E beta chain precursor	antigen processing and presentation of peptide or polysaccharide antigen via MHC class II (GO:0002504); protein binding (GO:0005515); extracellular space (GO:0005615); immune response (GO:0006955); membrane (GO:0016020); integral component of membrane (GO:0016021); antigen processing and presentation (GO:0019882); antigen processing and presentation of exogenous antigen (GO:0019884); antigen proc…	H2-Eb1	RefSeq	0.477602	-2.09379	4.41703	2.02271	0.037921	Female	class_II	IIA
H2-K2	[TAD3192_chr17],[Minus]	chr17:34,111,603-34,115,736	NR_004446			H2-K2	RefSeq	0.545694	-1.83253	4.94219	2.58837	3.99905e-10	Female	class_II	IIA
H2-Q1	[TAD3196_chr17],[Plus],[Overlaps with:LOC547349],[Multi-counted reads: -, -, Intron-only_counting]	chr17:35,457,502-35,462,044	NM_010390	Histocompatibility 2, Q region locus 1, histocompatibility 2, Q region locus 1 precursor	defense response (GO:0006952); immune response (GO:0006955); external side of plasma membrane (GO:0009897); membrane (GO:0016020); integral component of membrane (GO:0016021); antigen processing and presentation (GO:0019882); antigen processing and presentation of endogenous antigen (GO:0019883); antigen processing and presentation of endogenous peptide antigen via MHC class I (GO:0019885); obsol…	H2-Q1	RefSeq	0.223755	-4.46918	6.74789	1.43692	8.18566e-31	Female	class_I	IA
H2-Q4	[TAD3196_chr17],[Plus]	chr17:35,516,561-35,521,619	NM_001143689			H2-Q4	RefSeq	0.633807	-1.57777	16.1131	9.84233	0.000458547	Female	class_II	IIA
H2-T24	[TAD3196_chr17],[Minus]	chr17:36,142,639-36,157,505	NM_008207	Histocompatibility 2, T region locus 24, histocompatibility 2, T region locus 24 precursor	molecular_function (GO:0003674); cellular_component (GO:0005575); defense response (GO:0006952); immune response (GO:0006955); biological_process (GO:0008150); membrane (GO:0016020); integral component of membrane (GO:0016021)	H2-T24	RefSeq	0.543249	-1.84078	1.89422	1.00628	0.000162041	Female	no_response	none
HACL1	[TAD2758_chr14],[Minus]	chr14:32,420,411-32,454,151	NM_019975	2-hydroxyacyl-CoA lyase 1, 2-hydroxyacyl-CoA lyase 1	magnesium ion binding (GO:0000287); fatty acid alpha-oxidation (GO:0001561); catalytic activity (GO:0003824); peroxisome (GO:0005777); lipid metabolic process (GO:0006629); lyase activity (GO:0016829); carbon-carbon lyase activity (GO:0016830); thiamine pyrophosphate binding (GO:0030976); metal ion binding (GO:0046872)	Hacl1	RefSeq	0.591716	-1.69	132.132	75.3357	5.49617e-17	Female	class_I	IB
HAMP	[TAD1426_chr7],[Minus]	chr7:31,727,387-31,729,036	NM_032541	Hepcidin antimicrobial peptide, hepcidin precursor	hormone activity (GO:0005179); extracellular region (GO:0005576); extracellular space (GO:0005615); cytoplasm (GO:0005737); cellular iron ion homeostasis (GO:0006879); defense response to bacterium (GO:0042742); apical cortex (GO:0045179); defense response to fungus (GO:0050832)	Hamp	RefSeq	0.562605	-1.77744	1250.41	677.582	1.87083e-11	Female	no_response	none
HAMP2	[TAD1426_chr7],[Minus]	chr7:31,707,390-31,709,200	NM_183257	Hepcidin antimicrobial peptide 2, hepcidin-2 precursor	hormone activity (GO:0005179); extracellular region (GO:0005576); xenobiotic metabolic process (GO:0006805); cellular iron ion homeostasis (GO:0006879); killing of cells of other organism (GO:0031640); defense response to bacterium (GO:0042742); defense response to fungus (GO:0050832)	Hamp2	RefSeq	0.103112	-9.69822	329.542	32.6571	3.45008e-36	Female	class_II	IIB
HAO2	[TAD674_chr3],[Minus]	chr3:98,678,441-98,697,153	NM_019545	Hydroxyacid oxidase 2, hydroxyacid oxidase 2	catalytic activity (GO:0003824); (S)-2-hydroxy-acid oxidase activity (GO:0003973); mitochondrion (GO:0005739); peroxisome (GO:0005777); fatty acid metabolic process (GO:0006631); metabolic process (GO:0008152); FMN binding (GO:0010181); oxidoreductase activity (GO:0016491); mandelate metabolic process (GO:0018924); protein homooligomerization (GO:0051260); oxidation-reduction process (GO:0055114)	Hao2	RefSeq	0.0435679	-22.9527	46.3506	1.94885	2.54276e-22	Female	class_II	IIA
HBEGF	[TAD3317_chr18],[Minus]	chr18:36,664,580-36,675,459	NM_010415	Heparin-binding EGF-like growth factor, proheparin-binding EGF-like growth factor precursor	angiogenesis (GO:0001525); blastocyst growth (GO:0001832); epidermal growth factor receptor binding (GO:0005154); extracellular region (GO:0005576); extracellular space (GO:0005615); plasma membrane (GO:0005886); integral component of plasma membrane (GO:0005887); epidermal growth factor receptor signaling pathway (GO:0007173); regulation of heart contraction (GO:0008016); growth factor activity …	Hbegf	RefSeq	0.475743	-2.10198	0.396975	0.171023	0.0123387	Female	no_response	none
HCK	[TAD494_chr2],[Plus],[Overlapping_Isoform_Count: 2]	chr2:152,934,203-152,977,177	NM_001172117 NM_010407	Hemopoietic cell kinase, tyrosine-protein kinase HCK isoform p56Hck;tyrosine-protein kinase HCK isoform p59Hck	nucleotide binding (GO:0000166); protein kinase activity (GO:0004672); protein serine/threonine kinase activity (GO:0004674); protein tyrosine kinase activity (GO:0004713); non-membrane spanning protein tyrosine kinase activity (GO:0004715); protein binding (GO:0005515); ATP binding (GO:0005524); protein phosphorylation (GO:0006468); phagocytosis (GO:0006909); membrane (GO:0016020); kinase activi…	Hck	RefSeq	0.545874	-1.83192	1.66596	0.873396	0.0483409	Female	class_II	IIA
HCLS1	[TAD3070_chr16],[Plus]	chr16:36,935,068-36,963,300	NM_008225	Hematopoietic cell specific Lyn substrate 1, hematopoietic lineage cell-specific protein	protein binding (GO:0005515); nucleus (GO:0005634); cytoplasm (GO:0005737); mitochondrion (GO:0005739); positive regulation of cell proliferation (GO:0008284); response to hormone (GO:0009725); SH3 domain binding (GO:0017124); erythrocyte differentiation (GO:0030218); positive regulation of tyrosine phosphorylation of STAT protein (GO:0042531)	Hcls1	RefSeq	0.658893	-1.5177	2.2905	1.46244	0.00995212	Female	class_II	IIA
HEXB	[TAD2679_chr13],[Minus]	chr13:97,946,285-97,968,312	NM_010422	Hexosaminidase B, beta-hexosaminidase subunit beta precursor	skeletal system development (GO:0001501); acrosomal vesicle (GO:0001669); catalytic activity (GO:0003824); hydrolase activity, hydrolyzing O-glycosyl compounds (GO:0004553); beta-N-acetylhexosaminidase activity (GO:0004563); extracellular space (GO:0005615); obsolete soluble fraction (GO:0005625); lysosome (GO:0005764); carbohydrate metabolic process (GO:0005975); N-acetylglucosamine metabolic pr…	Hexb	RefSeq	0.31083	-3.21719	8.71757	2.62889	4.01823e-41	Female	no_response	none
HIST1H4I	[TAD2557_chr13],[Minus]	chr13:22,132,828-22,133,231	NM_175656	histone cluster 1, H4i, histone H4	molecular_function (GO:0003674); cellular_component (GO:0005575); biological_process (GO:0008150)	Hist1h4i	RefSeq	0.535804	-1.86635	3.33471	1.71979	0.00445746	Female	no_response	none
HK3	[TAD2625_chr13],[Minus],[Overlapping_Isoform_Count: 4]	chr13:55,107,345-55,122,180 chr13:55,107,345-55,122,746	NM_001033245 NM_001206392 NM_001206391 NM_001206390	Hexokinase 3, hexokinase-3 isoform 3;hexokinase-3 isoform 1;hexokinase-3 isoform 2	nucleotide binding (GO:0000166); hexokinase activity (GO:0004396); protein binding (GO:0005515); ATP binding (GO:0005524); mitochondrion (GO:0005739); carbohydrate metabolic process (GO:0005975); glycolytic process (GO:0006096); biological_process (GO:0008150); kinase activity (GO:0016301); phosphorylation (GO:0016310); transferase activity (GO:0016740); phosphotransferase activity, alcohol group…	Hk3	RefSeq	0.502672	-1.98937	1.15557	0.562294	0.0243204	Female	no_response	none
HPD	[TAD1116_chr5],[Minus]	chr5:123,621,815-123,632,695	NM_008277	4-hydroxyphenylpyruvic acid dioxygenase, 4-hydroxyphenylpyruvate dioxygenase	Golgi membrane (GO:0000139); 4-hydroxyphenylpyruvate dioxygenase activity (GO:0003868); cytoplasm (GO:0005737); endoplasmic reticulum (GO:0005783); endoplasmic reticulum membrane (GO:0005789); Golgi apparatus (GO:0005794); L-phenylalanine catabolic process (GO:0006559); tyrosine catabolic process (GO:0006572); quercetin 2,3-dioxygenase activity (GO:0008127); aromatic amino acid family metabolic p…	Hpd	RefSeq	0.630954	-1.5849	824.95	501.786	8.08415e-13	Female	no_response	none
HSD3B1	[TAD674_chr3],[Minus],[Overlapping_Isoform_Count: 2]	chr3:98,656,116-98,663,717	NM_008293 NM_001304800	Hydroxy-delta-5-steroid dehydrogenase, 3 beta- and steroid delta-isomerase 1, 3 beta-hydroxysteroid dehydrogenase/Delta 5-->4-isomerase type 1	catalytic activity (GO:0003824); 3-beta-hydroxy-delta5-steroid dehydrogenase activity (GO:0003854); steroid delta-isomerase activity (GO:0004769); binding (GO:0005488); mitochondrion (GO:0005739); endoplasmic reticulum (GO:0005783); steroid biosynthetic process (GO:0006694); C21-steroid hormone biosynthetic process (GO:0006700); metabolic process (GO:0008152); membrane (GO:0016020); integral comp…	Hsd3b1	RefSeq	0.030758	-32.5118	1.23863	0.0379279	4.66737e-16	Female	class_I	IA
HTRA4	[TAD1619_chr8],[Minus]	chr8:26,135,399-26,149,434	NM_001081187	HtrA serine peptidase 4, serine protease HTRA4 precursor	molecular_function (GO:0003674); cellular_component (GO:0005575); biological_process (GO:0008150)	Htra4	RefSeq	0.467161	-2.14059	1.06996	0.488008	1.35616e-05	Female	no_response	none
I830012O16RIK	[TAD3468_chr19],[Plus]	chr19:34,682,446-34,687,891	NM_001005858	RIKEN cDNA I830012O16 gene,	molecular_function (GO:0003674); cellular_component (GO:0005575); biological_process (GO:0008150)	I830012O16Rik	RefSeq	0.592924	-1.68656	0.882416	0.505398	0.0110291	Female	no_response	none
ID1	[TAD493_chr2],[Plus]	chr2:152,561,986-152,563,146	NM_010495	Inhibitor of DNA binding 1, DNA-binding protein inhibitor ID-1	negative regulation of transcription by RNA polymerase II (GO:0000122); endothelial cell morphogenesis (GO:0001886); protein binding (GO:0005515); obsolete soluble fraction (GO:0005625); nucleus (GO:0005634); cytoplasm (GO:0005737); apoptotic process (GO:0006915); multicellular organism development (GO:0007275); heart development (GO:0007507); BMP signaling pathway (GO:0030509); obsolete transcri…	Id1	RefSeq	0.467109	-2.14083	6.08305	2.7492	0.0129951	Female	class_II	IIA
IFI202B	[TAD226_chr1],[Minus],[Overlapping_Isoform_Count: 2]	chr1:175,892,699-175,912,975	NM_011940 NM_008327	Interferon activated gene 202B, interferon-activable protein 202	protein binding (GO:0005515); nucleus (GO:0005634); cytoplasm (GO:0005737); immune response (GO:0006955)	Ifi202b	RefSeq	0.528752	-1.89125	2.02037	1.01959	5.02247e-05	Female	no_response	none
IFI204	[TAD226_chr1],[Minus]	chr1:175,677,424-175,697,050	NM_008329	Interferon activated gene 204, interferon-activable protein 204	transcription cofactor activity (GO:0003712); protein binding (GO:0005515); nucleus (GO:0005634); nucleoplasm (GO:0005654); nucleolus (GO:0005730); cytoplasm (GO:0005737); regulation of transcription, DNA-templated (GO:0006355); regulation of transcription by RNA polymerase II (GO:0006357); immune response (GO:0006955); multicellular organism development (GO:0007275); intrinsic apoptotic signalin…	Ifi204	RefSeq	0.575236	-1.73842	0.840314	0.467008	0.047985	Female	no_response	none
IFI205	[TAD226_chr1],[Minus]	chr1:175,942,128-175,961,886	NM_172648	Interferon activated gene 205, interferon-activable protein 205-A	protein binding (GO:0005515); nucleus (GO:0005634)	Ifi205	RefSeq	0.206994	-4.83106	0.268867	0.0527781	0.000235684	Female	no_response	none
IFI27L2B	[TAD2513_chr12],[Minus]	chr12:104,689,107-104,695,433	NM_145449	Interferon, alpha-inducible protein 27 like 2B, interferon alpha-inducible protein 27-like protein 2B precursor	molecular_function (GO:0003674); cellular_component (GO:0005575); biological_process (GO:0008150)	Ifi27l2b	RefSeq	0.412229	-2.42583	0.925174	0.356414	0.00274938	Female	no_response	none
IFIT1	[TAD3468_chr19],[Plus]	chr19:34,715,378-34,724,499	NM_008331	Interferon-induced protein with tetratricopeptide repeats 1, interferon-induced protein with tetratricopeptide repeats 1	binding (GO:0005488); immune response (GO:0006955); cellular response to interferon-alpha (GO:0035457)	Ifit1	RefSeq	0.475103	-2.1048	1.73267	0.794281	5.3076e-06	Female	class_I	IA
IFIT2	[TAD3468_chr19],[Plus]	chr19:34,625,183-34,651,024	NM_008332	Interferon-induced protein with tetratricopeptide repeats 2, interferon-induced protein with tetratricopeptide repeats 2	binding (GO:0005488); immune response (GO:0006955); cellular response to interferon-alpha (GO:0035457)	Ifit2	RefSeq	0.620482	-1.61165	0.704536	0.421265	0.00875341	Female	no_response	none
IFIT3	[TAD3468_chr19],[Plus]	chr19:34,658,018-34,663,472	NM_010501	Interferon-induced protein with tetratricopeptide repeats 3, interferon-induced protein with tetratricopeptide repeats 3	binding (GO:0005488); immune response (GO:0006955)	Ifit3	RefSeq	0.55812	-1.79173	2.48676	1.34121	1.93547e-06	Female	class_I	IA
IGFBP1	[TAD2171_chr11],[Plus]	chr11:7,097,789-7,102,549	NM_008341	Insulin-like growth factor binding protein 1, insulin-like growth factor-binding protein 1 precursor	regulation of cell growth (GO:0001558); insulin-like growth factor binding (GO:0005520); extracellular region (GO:0005576); extracellular space (GO:0005615); growth factor binding (GO:0019838)	Igfbp1	RefSeq	0.367643	-2.72003	11.3611	4.02208	2.48963e-14	Female	class_II	IIB
IGFBP3	[TAD2172_chr11],[Minus]	chr11:7,106,095-7,113,926	NM_008343	Insulin-like growth factor binding protein 3, insulin-like growth factor-binding protein 3 precursor	regulation of cell growth (GO:0001558); osteoblast differentiation (GO:0001649); negative regulation of protein phosphorylation (GO:0001933); protein binding (GO:0005515); insulin-like growth factor binding (GO:0005520); extracellular region (GO:0005576); extracellular space (GO:0005615); obsolete soluble fraction (GO:0005625); nucleus (GO:0005634); protein phosphorylation (GO:0006468); negative …	Igfbp3	RefSeq	0.630629	-1.58572	8.39409	5.09795	7.09036e-08	Female	no_response	none
IGSF6	[TAD1557_chr7],[Minus]	chr7:128,207,580-128,218,044	NM_030691	Immunoglobulin superfamily, member 6, immunoglobulin superfamily member 6 precursor	molecular_function (GO:0003674); cellular_component (GO:0005575); biological_process (GO:0008150); membrane (GO:0016020); integral component of membrane (GO:0016021)	Igsf6	RefSeq	0.537761	-1.85956	1.73947	0.899645	0.0247199	Female	no_response	none
IGTP	[TAD2243_chr11],[Plus]	chr11:58,013,057-58,021,094	NM_018738	Interferon gamma induced GTPase, interferon gamma induced GTPase	GTPase activity (GO:0003924); cytosol (GO:0005829); obsolete GTP catabolic process (GO:0006184)	Igtp	RefSeq	0.49027	-2.03969	27.3503	12.9012	0.0258591	Female	class_I	IA
IL10RA	[TAD1823_chr9],[Minus],[Overlaps with:Mir7086]	chr9:45,061,921-45,077,229	NM_008348	Interleukin 10 receptor, alpha, interleukin-10 receptor subunit alpha precursor	cytokine receptor activity (GO:0004896); extracellular space (GO:0005615); cytoplasm (GO:0005737); integral component of plasma membrane (GO:0005887); signal transduction (GO:0007165); cell surface receptor signaling pathway (GO:0007166); blood coagulation (GO:0007596); membrane (GO:0016020); integral component of membrane (GO:0016021)	Il10ra	RefSeq	0.571937	-1.74844	0.840256	0.46255	0.000206099	Female	class_II	IIA
IL15	[TAD1695_chr8],[Minus],[Overlapping_Isoform_Count: 2]	chr8:84,855,522-84,926,485	NM_008357 NM_001254747	Interleukin 15, interleukin-15 precursor	NK T cell proliferation (GO:0001866); cytokine activity (GO:0005125); cytokine receptor binding (GO:0005126); extracellular region (GO:0005576); extracellular space (GO:0005615); immune response (GO:0006955); obsolete lymph gland development (GO:0007515); positive regulation of T cell proliferation (GO:0042102); extrathymic T cell selection (GO:0045062); regulation of T cell differentiation (GO:0…	Il15	RefSeq	0.472636	-2.1158	0.904774	0.396753	0.00180824	Female	class_II	IIA
IL18BP	[TAD1523_chr7],[Minus]	chr7:109,163,590-109,166,669	NM_010531	Interleukin 18 binding protein, interleukin-18-binding protein precursor	extracellular region (GO:0005576); extracellular space (GO:0005615)	Il18bp	RefSeq	0.617306	-1.61994	5.90519	3.51663	0.00875341	Female	no_response	none
IL1B	[TAD453_chr2],[Minus]	chr2:129,190,315-129,196,856	NM_008361	Interleukin 1 beta, interleukin-1 beta	angiogenesis (GO:0001525); fever generation (GO:0001660); cytokine activity (GO:0005125); interleukin-1 receptor binding (GO:0005149); extracellular region (GO:0005576); extracellular space (GO:0005615); inflammatory response (GO:0006954); immune response (GO:0006955); positive regulation of cytosolic calcium ion concentration (GO:0007204); aging (GO:0007568); memory (GO:0007613); growth factor a…	Il1b	RefSeq	0.311574	-3.20951	2.7704	0.833948	2.7161e-05	Female	class_II	IIA
IL2RG	[TAD3561_chrX],[Minus]	chrX:98,459,725-98,463,545	NM_013563	Interleukin 2 receptor, gamma chain, cytokine receptor common subunit gamma isoform b precursor;cytokine receptor common subunit gamma isoform a precursor	cytokine receptor activity (GO:0004896); extracellular space (GO:0005615); integral component of plasma membrane (GO:0005887); cell surface receptor signaling pathway (GO:0007166); external side of plasma membrane (GO:0009897); cell surface (GO:0009986); regulation of gene expression (GO:0010468); membrane (GO:0016020); integral component of membrane (GO:0016021); interleukin-2 binding (GO:001997…	Il2rg	RefSeq	0.467431	-2.13936	1.38604	0.626638	0.00551487	Female	no_response	none
IL7	[TAD547_chr3],[Minus]	chr3:7,572,076-7,613,427	NM_008371	Interleukin 7, interleukin-7 isoform a precursor;interleukin-7 isoform c;interleukin-7 isoform b	T cell lineage commitment (GO:0002360); cytokine activity (GO:0005125); cytokine receptor binding (GO:0005126); interleukin-7 receptor binding (GO:0005139); extracellular region (GO:0005576); extracellular space (GO:0005615); immune response (GO:0006955); growth factor activity (GO:0008083); regulation of gene expression (GO:0010468); negative regulation of cell growth (GO:0030308); positive regu…	Il7	RefSeq	0.17067	-5.85925	0.329147	0.0506617	9.23553e-09	Female	no_response	none
ILDR2	[TAD211_chr1],[Plus]	chr1:168,184,269-168,246,963	NM_001164528	Immunoglobulin-like domain containing receptor 2, immunoglobulin-like domain-containing receptor 2 precursor	response to glucose (GO:0009749); insulin secretion (GO:0030073); cell differentiation (GO:0030154); pancreas development (GO:0031016); homeostasis of number of cells within a tissue (GO:0048873)	Ildr2	RefSeq	0.488907	-2.04538	3.35022	1.58195	2.05712e-17	Female	class_II	IIA
IRGM1	[TAD2226_chr11],[Minus]	chr11:48,678,750-48,684,848	NM_008326	Immunity-related GTPase family M member 1, immunity-related GTPase family M protein 1	nucleotide binding (GO:0000166); GTP binding (GO:0005525); endoplasmic reticulum (GO:0005783); Golgi apparatus (GO:0005794); plasma membrane (GO:0005886); autophagy (GO:0006914); defense response (GO:0006952); membrane (GO:0016020); hydrolase activity (GO:0016787); cytoplasmic vesicle (GO:0031410); innate immune response (GO:0045087)	Irgm1	RefSeq	0.628426	-1.59128	22.1971	13.4277	0.0126844	Female	class_I	IA
ISG15	[TAD973_chr4end],[Minus]	chr4:155,573,532-155,574,927	NM_015783	ISG15 ubiquitin-like modifier, ubiquitin-like protein ISG15 precursor	protein binding (GO:0005515); extracellular region (GO:0005576); cytoplasm (GO:0005737); response to virus (GO:0009615); modification-dependent protein catabolic process (GO:0019941); protein tag (GO:0031386); ISG15-protein conjugation (GO:0032020)	Isg15	RefSeq	0.641583	-1.55865	5.63351	3.50636	0.000519256	Female	class_I	IA
ITGA4	[TAD382_chr2],[Plus]	chr2:79,095,582-79,173,271	NM_010576	Integrin alpha 4, integrin alpha-4 precursor	fibronectin binding (GO:0001968); blood vessel remodeling (GO:0001974); protein binding (GO:0005515); cell adhesion (GO:0007155); heterophilic cell-cell adhesion via plasma membrane cell adhesion molecules (GO:0007157); leukocyte cell-cell adhesion (GO:0007159); cell-matrix adhesion (GO:0007160); signal transduction (GO:0007165); integrin-mediated signaling pathway (GO:0007229); heart development…	Itga4	RefSeq	0.62302	-1.60509	1.05246	0.626857	0.000734755	Female	class_II	IIB
ITGA6	[TAD366_chr2],[Plus],[Overlapping_Isoform_Count: 2]	chr2:71,624,995-71,696,484	NM_008397 NM_001277970	Integrin alpha 6, integrin alpha-6 isoform 2 precursor;integrin alpha-6 isoform 1 precursor	integrin binding (GO:0005178); protein binding (GO:0005515); basement membrane (GO:0005604); plasma membrane (GO:0005886); cell-cell adherens junction (GO:0005913); cell adhesion (GO:0007155); cell-matrix adhesion (GO:0007160); signal transduction (GO:0007165); integrin-mediated signaling pathway (GO:0007229); integrin complex (GO:0008305); external side of plasma membrane (GO:0009897); cell surf…	Itga6	RefSeq	0.66459	-1.50469	0.84001	0.534473	0.00606743	Female	class_I	IA
ITGAL	[TAD1571_chr7],[Plus],[Overlapping_Isoform_Count: 4]	chr7:134,439,773-134,478,651	NM_008400 NM_001253873 NM_001253874 NM_001253872	Integrin alpha L, integrin alpha-L isoform 4 precursor;integrin alpha-L isoform 3 precursor;integrin alpha-L isoform 2 precursor;integrin alpha-L isoform 1 precursor	magnesium ion binding (GO:0000287); immunological synapse (GO:0001772); protein binding (GO:0005515); extracellular space (GO:0005615); plasma membrane (GO:0005886); defense response (GO:0006952); cell adhesion (GO:0007155); leukocyte cell-cell adhesion (GO:0007159); cell-matrix adhesion (GO:0007160); signal transduction (GO:0007165); cell surface receptor signaling pathway (GO:0007166); integrin…	Itgal	RefSeq	0.51791	-1.93084	2.00307	0.997281	2.01609e-06	Female	no_response	none
ITGB2	[TAD2085_chr10],[Plus]	chr10:76,993,092-77,028,419	NM_008404	Integrin beta 2, integrin beta-2 precursor	leukocyte migration involved in inflammatory response (GO:0002523); binding (GO:0005488); protein binding (GO:0005515); extracellular space (GO:0005615); obsolete membrane fraction (GO:0005624); cell adhesion (GO:0007155); leukocyte cell-cell adhesion (GO:0007159); cell-matrix adhesion (GO:0007160); signal transduction (GO:0007165); integrin-mediated signaling pathway (GO:0007229); multicellular …	Itgb2	RefSeq	0.608906	-1.64229	2.08181	1.21536	0.00159467	Female	no_response	none
JAZF1	[TAD1239_chr6;TAD1240_chr6],[Minus],[Overlapping_Isoform_Count: 2]	chr6:52,718,061-53,018,618 chr6:52,718,061-52,859,614	NM_173406 NM_001168277	JAZF zinc finger 1, juxtaposed with another zinc finger protein 1 isoform 1;juxtaposed with another zinc finger protein 1 isoform 2	negative regulation of transcription by RNA polymerase II (GO:0000122); nucleic acid binding (GO:0003676); transcription corepressor activity (GO:0003714); intracellular (GO:0005622); nucleus (GO:0005634); regulation of transcription, DNA-templated (GO:0006355); zinc ion binding (GO:0008270); transcriptional repressor complex (GO:0017053); metal ion binding (GO:0046872)	Jazf1	RefSeq	0.474551	-2.10725	0.346847	0.155359	0.00171038	Female	no_response	none
KCNJ10	[TAD223_chr1],[Plus]	chr1:174,271,340-174,304,216	NM_001039484	Potassium inwardly-rectifying channel, subfamily J, member 10, ATP-sensitive inward rectifier potassium channel 10	nucleotide binding (GO:0000166); ion channel activity (GO:0005216); inward rectifier potassium channel activity (GO:0005242); voltage-gated ion channel activity (GO:0005244); potassium channel activity (GO:0005267); protein binding (GO:0005515); ATP binding (GO:0005524); integral component of plasma membrane (GO:0005887); transport (GO:0006810); ion transport (GO:0006811); potassium ion transport…	Kcnj10	RefSeq	0.520127	-1.92261	0.394487	0.19173	0.000980022	Female	no_response	none
KITL	[TAD2121_chr10],[Plus]	chr10:99,478,457-99,563,046	NM_013598	Kit ligand, kit ligand precursor	ovarian follicle development (GO:0001541); neural crest cell migration (GO:0001755); positive regulation of myeloid leukocyte differentiation (GO:0002763); cytokine activity (GO:0005125); stem cell factor receptor binding (GO:0005173); protein binding (GO:0005515); extracellular region (GO:0005576); extracellular space (GO:0005615); cytoplasm (GO:0005737); cytoskeleton (GO:0005856); plasma membra…	Kitl	RefSeq	0.552488	-1.81	0.351721	0.188213	0.00994424	Female	no_response	none
KLF6	[TAD2540_chr13],[Plus]	chr13:5,860,734-5,869,639	NM_011803	Kruppel-like factor 6, Krueppel-like factor 6	nucleic acid binding (GO:0003676); DNA binding (GO:0003677); double-stranded DNA binding (GO:0003690); DNA binding transcription factor activity (GO:0003700); intracellular (GO:0005622); nucleus (GO:0005634); cytoplasm (GO:0005737); regulation of transcription, DNA-templated (GO:0006355); zinc ion binding (GO:0008270); cytokine-mediated signaling pathway (GO:0019221); positive regulation of trans…	Klf6	RefSeq	0.630084	-1.58709	1.87659	1.13378	0.02628	Female	no_response	none
KLHL13	[TAD3528_chrX;TAD3529_chrX],[Minus],[Overlapping_Isoform_Count: 2]	chrX:22,796,396-22,942,208 chrX:22,796,396-22,862,554	NM_026167 NM_001290476	Kelch-like 13 (Drosophila), kelch-like protein 13 isoform 1;kelch-like protein 13 isoform 3;kelch-like protein 13 isoform 2	molecular_function (GO:0003674); protein binding (GO:0005515); cellular_component (GO:0005575); biological_process (GO:0008150)	Klhl13	RefSeq	0.447241	-2.23593	2.38128	1.01789	2.76152e-15	Female	no_response	none
KLRA2	[TAD1370_chr6],[Minus],[Overlapping_Isoform_Count: 2]	chr6:131,169,252-131,197,380	NM_001170851 NM_008462	Killer cell lectin-like receptor, subfamily A, member 2, killer cell lectin-like receptor 2 isoform 2;killer cell lectin-like receptor 2 isoform 1	binding (GO:0005488); protein binding (GO:0005515); plasma membrane (GO:0005886); defense response (GO:0006952); cell adhesion (GO:0007155); signal transduction (GO:0007165); membrane (GO:0016020); integral component of membrane (GO:0016021)	Klra2	RefSeq	0.562639	-1.77734	0.661828	0.355944	0.0198177	Female	no_response	none
LACC1	[TAD2834_chr14],[Minus]	chr14:77,424,007-77,436,424	NM_172488			Lacc1	RefSeq	0.546594	-1.82951	3.44649	1.81854	7.25919e-10	Female	no_response	none
LCK	[TAD933_chr4],[Minus],[Overlapping_Isoform_Count: 3],[Overlaps with:Mir8119]	chr4:129,225,587-129,250,885 chr4:129,225,587-129,235,616	NM_010693 NM_001162432 NM_001162433	Lymphocyte protein tyrosine kinase, proto-oncogene tyrosine-protein kinase LCK isoform b;proto-oncogene tyrosine-protein kinase LCK isoform a	nucleotide binding (GO:0000166); protein kinase activity (GO:0004672); protein serine/threonine kinase activity (GO:0004674); protein tyrosine kinase activity (GO:0004713); non-membrane spanning protein tyrosine kinase activity (GO:0004715); protein binding (GO:0005515); ATP binding (GO:0005524); cytoplasm (GO:0005737); plasma membrane (GO:0005886); protein phosphorylation (GO:0006468); cell surf…	Lck	RefSeq	0.483193	-2.06957	0.263968	0.11954	0.0478871	Female	no_response	none
LECT2	[TAD2627_chr13],[Minus]	chr13:56,643,820-56,649,899	NM_010702	Leukocyte cell-derived chemotaxin 2, leukocyte cell-derived chemotaxin-2 precursor	extracellular region (GO:0005576); extracellular space (GO:0005615); chemotaxis (GO:0006935); sensory perception (GO:0007600); negative regulation of Wnt signaling pathway (GO:0030178)	Lect2	RefSeq	0.545476	-1.83326	79.612	41.8904	9.81861e-20	Female	class_I	IA
LGALS1	[TAD2969_chr15],[Plus]	chr15:78,757,154-78,760,895	NM_008495	Lectin, galactose binding, soluble 1, galectin-1	galactose binding (GO:0005534); extracellular region (GO:0005576); (GO:0005578); extracellular space (GO:0005615); nucleus (GO:0005634); cytoplasm (GO:0005737); heterophilic cell-cell adhesion via plasma membrane cell adhesion molecules (GO:0007157); cell surface (GO:0009986); negative regulation of cell-substrate adhesion (GO:0010812); negative regulation of neuron projection development (GO:001…	Lgals1	RefSeq	0.635412	-1.57378	4.78501	2.90523	0.000763025	Female	class_II	IIB
LGR5	[TAD2138_chr10],[Minus]	chr10:114,887,369-115,024,836	NM_010195	Leucine rich repeat containing G protein coupled receptor 5, leucine-rich repeat-containing G-protein coupled receptor 5 precursor	obsolete rhodopsin-like receptor activity (GO:0001584); signal transducer activity (GO:0004871); G-protein coupled receptor activity (GO:0004930); protein binding (GO:0005515); extracellular space (GO:0005615); plasma membrane (GO:0005886); signal transduction (GO:0007165); G-protein coupled receptor signaling pathway (GO:0007186); membrane (GO:0016020); integral component of membrane (GO:0016021…	Lgr5	RefSeq	0.569246	-1.75671	0.665238	0.355606	0.00258411	Female	no_response	none
LHPP	[TAD1584_chr7],[Plus]	chr7:139,802,325-139,898,102	NM_029609	Phospholysine phosphohistidine inorganic pyrophosphate phosphatase, phospholysine phosphohistidine inorganic pyrophosphate phosphatase	molecular_function (GO:0003674); catalytic activity (GO:0003824); inorganic diphosphatase activity (GO:0004427); cellular_component (GO:0005575); biological_process (GO:0008150); metabolic process (GO:0008152); hydrolase activity (GO:0016787)	Lhpp	RefSeq	0.579527	-1.72555	10.913	6.12338	1.9812e-08	Female	class_II	IIB
LIG1	[TAD1412_chr7],[Plus],[Overlapping_Isoform_Count: 3]	chr7:13,864,174-13,896,776 chr7:13,862,661-13,896,776 chr7:13,864,613-13,896,776	NM_010715 NM_001199310 NM_001083188	Ligase I, DNA, ATP-dependent, DNA ligase 1	nucleotide binding (GO:0000166); cytokinesis (GO:0000910); nucleic acid binding (GO:0003676); DNA binding (GO:0003677); DNA ligase activity (GO:0003909); DNA ligase (ATP) activity (GO:0003910); ATP binding (GO:0005524); nucleus (GO:0005634); DNA replication (GO:0006260); DNA repair (GO:0006281); DNA recombination (GO:0006310); cellular response to DNA damage stimulus (GO:0006974); cell cycle (GO:…	Lig1	RefSeq	0.642053	-1.5575	0.554805	0.340392	0.0178897	Female	class_II	IIB
LILRB4	[TAD2041_chr10],[Plus],[Overlapping_Isoform_Count: 2]	chr10:51,210,703-51,216,417	NM_013532 NM_001291894	Leukocyte immunoglobulin-like receptor, subfamily B, member 4,	extracellular space (GO:0005615); plasma membrane (GO:0005886); immune response (GO:0006955); membrane (GO:0016020); integral component of membrane (GO:0016021)	Lilrb4	RefSeq	0.430369	-2.32359	3.53827	1.46051	0.00411569	Female	class_II	IIA
LRRC24	[TAD2963_chr15],[Minus],[Overlaps with:C030006K11Rik]	chr15:76,545,705-76,552,603	NM_198119	Leucine rich repeat containing 24, leucine-rich repeat-containing protein 24 precursor	molecular_function (GO:0003674); cellular_component (GO:0005575); biological_process (GO:0008150); membrane (GO:0016020); integral component of membrane (GO:0016021)	Lrrc24	RefSeq	0.590056	-1.69475	1.59894	0.91486	0.00643134	Female	class_II	IIB
LRRC25	[TAD1680_chr8],[Plus]	chr8:73,140,742-73,144,749	NM_153074	Leucine rich repeat containing 25, leucine-rich repeat-containing protein 25 precursor	molecular_function (GO:0003674); cellular_component (GO:0005575); biological_process (GO:0008150); membrane (GO:0016020); integral component of membrane (GO:0016021)	Lrrc25	RefSeq	0.498761	-2.00497	1.52854	0.728064	0.00366544	Female	no_response	none
LRTM1	[TAD2751_chr14],[Plus]	chr14:29,831,393-29,846,828	NM_176920	Leucine-rich repeats and transmembrane domains 1, leucine-rich repeat and transmembrane domain-containing protein 1 precursor	molecular_function (GO:0003674); protein binding (GO:0005515); cellular_component (GO:0005575); biological_process (GO:0008150); membrane (GO:0016020); integral component of membrane (GO:0016021)	Lrtm1	RefSeq	0.267199	-3.74253	1.94774	0.50214	2.82949e-24	Female	no_response	none
LYZ2	[TAD2143_chr10],[Minus]	chr10:116,714,596-116,719,328	NM_017372	Lysozyme 2, lysozyme C-2 precursor	Golgi cis cisterna (GO:0000137); lysozyme activity (GO:0003796); catalytic activity (GO:0003824); extracellular region (GO:0005576); extracellular space (GO:0005615); obsolete soluble fraction (GO:0005625); cytoplasm (GO:0005737); mitochondrion (GO:0005739); endoplasmic reticulum lumen (GO:0005788); Golgi stack (GO:0005795); microvillus (GO:0005902); carbohydrate metabolic process (GO:0005975); m…	Lyz2	RefSeq	0.661958	-1.51067	21.2232	13.4864	0.0182073	Female	no_response	none
MAOB	[TAD3522_chrX],[Minus]	chrX:16,286,406-16,394,492	NM_172778	Monoamine oxidase B, amine oxidase [flavin-containing] B	mitochondrion (GO:0005739); mitochondrial outer membrane (GO:0005741); mitochondrial inner membrane (GO:0005743); obsolete electron transport (GO:0006118); primary amine oxidase activity (GO:0008131); negative regulation of serotonin secretion (GO:0014063); membrane (GO:0016020); integral component of membrane (GO:0016021); oxidoreductase activity (GO:0016491); neurotransmitter catabolic process …	Maob	RefSeq	0.553776	-1.80578	66.643	35.5755	1.8731e-20	Female	no_response	none
MARCKSL1	[TAD933_chr4],[Plus]	chr4:129,190,824-129,193,225	NM_010807	MARCKS-like 1, MARCKS-related protein	calmodulin binding (GO:0005516); positive regulation of cell proliferation (GO:0008284); vesicle-mediated transport (GO:0016192)	Marcksl1	RefSeq	0.633783	-1.57783	6.0337	3.67123	0.00219128	Female	no_response	none
MARCO	[TAD136_chr1],[Minus]	chr1:122,371,114-122,401,661	NM_010766	Macrophage receptor with collagenous structure, macrophage receptor MARCO	scavenger receptor activity (GO:0005044); signal transduction (GO:0007165); membrane (GO:0016020); integral component of membrane (GO:0016021); innate immune response (GO:0045087)	Marco	RefSeq	0.132514	-7.54638	9.07824	1.15254	3.17632e-06	Female	class_II	IIA
MAT1A	[TAD2768_chr14],[Plus]	chr14:41,918,321-41,937,717	NM_133653	Methionine adenosyltransferase I, alpha, S-adenosylmethionine synthase isoform type-1	nucleotide binding (GO:0000166); magnesium ion binding (GO:0000287); methionine adenosyltransferase activity (GO:0004478); ATP binding (GO:0005524); S-adenosylmethionine biosynthetic process (GO:0006556); one-carbon metabolic process (GO:0006730); amino acid binding (GO:0016597); transferase activity (GO:0016740); protein homodimerization activity (GO:0042803); ADP binding (GO:0043531); metal ion…	Mat1a	RefSeq	0.529544	-1.88842	549.636	280.481	3.05515e-18	Female	class_II	IIA
MBL2	[TAD3461_chr19],[Plus]	chr19:30,307,446-30,314,172	NM_010776	Mannose-binding lectin (protein C) 2, mannose-binding protein C precursor	complement activation, lectin pathway (GO:0001867); binding (GO:0005488); mannose binding (GO:0005537); extracellular region (GO:0005576); extracellular space (GO:0005615); complement activation, classical pathway (GO:0006958); protein self-association (GO:0043621); negative regulation of growth of symbiont in host (GO:0044130); innate immune response (GO:0045087); positive regulation of phagocyt…	Mbl2	RefSeq	0.644807	-1.55085	239.631	148.904	1.66083e-11	Female	no_response	none
MDM1	[TAD2144_chr10],[Plus],[Overlapping_Isoform_Count: 4]	chr10:117,578,842-117,606,055	NM_001162904 NM_010785 NM_148922 NM_001162905	Transformed mouse 3T3 cell double minute 1, nuclear protein MDM1 isoform 4;nuclear protein MDM1 isoform 2;nuclear protein MDM1 isoform 1;nuclear protein MDM1 isoform 3	nucleus (GO:0005634)	Mdm1	RefSeq	0.569561	-1.75574	0.414057	0.23362	0.0346459	Female	no_response	none
ME2	[TAD3381_chr18],[Minus]	chr18:73,929,693-73,975,046	NM_145494	Malic enzyme 2, NAD(+)-dependent, mitochondrial, NAD-dependent malic enzyme, mitochondrial precursor	catalytic activity (GO:0003824); malic enzyme activity (GO:0004470); malate dehydrogenase (decarboxylating) (NAD+) activity (GO:0004471); binding (GO:0005488); obsolete electron transporter activity (GO:0005489); mitochondrion (GO:0005739); pyruvate metabolic process (GO:0006090); malate metabolic process (GO:0006108); metabolic process (GO:0008152); oxidoreductase activity (GO:0016491); oxidored…	Me2	RefSeq	0.592	-1.68919	0.821312	0.467934	0.00274295	Female	no_response	none
MEG3	[TAD2521_chr12],[Plus],[Overlapping_Isoform_Count: 3],[Overlaps with:Mir1906-1;Mir1906-2;Mir770]	chr12:110,779,205-110,809,939 chr12:110,779,205-110,806,860 chr12:110,783,607-110,806,860	NR_027651 NR_027652 NR_003633	Maternally expressed 3,		Meg3	RefSeq	0.512602	-1.95083	0.640956	0.319233	1.19928e-06	Female	class_II	IIA
MEST	[TAD1199_chr6],[Plus],[Overlapping_Isoform_Count: 3],[Overlaps with:Mir335]	chr6:30,688,049-30,698,466 chr6:30,683,505-30,698,466 chr6:30,688,052-30,698,466	NM_008590 NM_001252293 NM_001252292	Mesoderm specific transcript, mesoderm-specific transcript protein isoform 1 precursor;mesoderm-specific transcript protein isoform 2;mesoderm-specific transcript protein isoform 1	catalytic activity (GO:0003824); aminopeptidase activity (GO:0004177); extracellular space (GO:0005615); endoplasmic reticulum (GO:0005783); proteolysis (GO:0006508); regulation of lipid storage (GO:0010883); membrane (GO:0016020); integral component of membrane (GO:0016021); hydrolase activity (GO:0016787); response to retinoic acid (GO:0032526)	Mest	RefSeq	0.644926	-1.55056	0.898181	0.569851	0.0154761	Female	no_response	none
MFSD2A	[TAD923_chr4],[Minus]	chr4:122,624,093-122,638,431	NM_029662	major facilitator superfamily domain containing 2A, sodium-dependent lysophosphatidylcholine symporter 1	transport (GO:0006810); membrane (GO:0016020); integral component of membrane (GO:0016021); transmembrane transport (GO:0055085)	Mfsd2a	RefSeq	0.428788	-2.33216	6.12767	2.54001	9.00913e-07	Female	class_I	IB
MGST3	[TAD212_chr1],[Minus]	chr1:169,302,514-169,323,928	NM_025569	Microsomal glutathione S-transferase 3, microsomal glutathione S-transferase 3	glutathione transferase activity (GO:0004364); glutathione peroxidase activity (GO:0004602); cellular_component (GO:0005575); endoplasmic reticulum (GO:0005783); obsolete microsome (GO:0005792); biological_process (GO:0008150); membrane (GO:0016020); integral component of membrane (GO:0016021); transferase activity (GO:0016740)	Mgst3	RefSeq	0.497725	-2.00914	11.165	5.32144	1.78347e-09	Female	class_II	IIA
MIR1906-1	[TAD2521_chr12;TAD3552_chrX],[Both],[nonOverlapping_Isoform_Count: 2],[Overlaps with:Meg3;Mir1906-2],[Multi-counted reads: Whole_gene_body, Exon-only_counting, -]	chrX:86,004,812-86,004,892 chr12:110,782,750-110,782,830	NR_035440			Mir1906-1	RefSeq	0.461689	-2.16596	4.80241	2.17163	0.0166399	Female	no_response	none
MIR1906-2	[TAD2521_chr12;TAD3552_chrX],[Both],[nonOverlapping_Isoform_Count: 2],[Overlaps with:Meg3;Mir1906-1],[Multi-counted reads: Whole_gene_body, Exon-only_counting, -]	chrX:86,004,812-86,004,892 chr12:110,782,750-110,782,830	NR_037313			Mir1906-2	RefSeq	0.461688	-2.16596	4.80241	2.17163	0.0166399	Female	no_response	none
MIR3968	[TAD2365_chr11],[Minus],[Multi-counted reads: Whole_gene_body, Exon-only_counting, -]	chr11:115,309,274-115,309,374	NR_039549			Mir3968	RefSeq	0.443284	-2.25589	5.79931	2.44482	0.0296929	Female	no_response	none
MIR5107	[TAD3354_chr18],[Plus],[Overlaps with:Cd74],[Multi-counted reads: Whole_gene_body, Exon-only_counting, -]	chr18:60,971,729-60,971,817	NR_039567			Mir5107	RefSeq	0.558171	-1.79156	140.094	75.2873	0.048618	Female	class_I	IA
MIR6392	[TAD2977_chr15],[Plus],[Overlaps with:Pnpla3],[Multi-counted reads: Whole_gene_body, Exon-only_counting, -]	chr15:83,998,699-83,998,807	NR_105816			Mir6392	RefSeq	0.109481	-9.13401	1.80825	0.180943	0.00319438	Female	no_response	none
MKX	[TAD3275_chr18],[Minus]	chr18:6,934,963-7,004,777	NM_177595	mohawk homeobox, homeobox protein Mohawk	molecular_function (GO:0003674); DNA binding (GO:0003677); DNA binding transcription factor activity (GO:0003700); cellular_component (GO:0005575); nucleus (GO:0005634); regulation of transcription, DNA-templated (GO:0006355); multicellular organism development (GO:0007275); muscle organ development (GO:0007517); biological_process (GO:0008150); obsolete transcription regulator activity (GO:00305…	Mkx	RefSeq	0.600094	-1.66641	1.34514	0.773485	3.87916e-05	Female	no_response	none
MLLT3	[TAD858_chr4],[Minus],[Overlapping_Isoform_Count: 3]	chr4:87,415,828-87,679,311 chr4:87,415,828-87,452,227	NM_029931 NM_027326 NM_001286158	Myeloid/lymphoid or mixed-lineage leukemia (trithorax homolog, Drosophila); translocated to, 3, protein AF-9 isoform 2;protein AF-9 isoform 1;protein AF-9 isoform 3	molecular_function (GO:0003674); protein binding (GO:0005515); nucleus (GO:0005634); regulation of transcription, DNA-templated (GO:0006355); segment specification (GO:0007379); anterior/posterior pattern specification (GO:0009952)	Mllt3	RefSeq	0.576399	-1.73491	0.464561	0.258829	0.000547459	Female	no_response	none
MMD2	[TAD1147_chr5],[Minus]	chr5:143,039,434-143,084,706	NM_175217	Monocyte to macrophage differentiation-associated 2, monocyte to macrophage differentiation factor 2	signal transduction (GO:0007165); membrane (GO:0016020); integral component of membrane (GO:0016021); cytolysis (GO:0019835)	Mmd2	RefSeq	0.372661	-2.68341	4.01268	1.45172	7.36671e-24	Female	class_II	IIA
MME	[TAD616_chr3],[Plus],[Overlapping_Isoform_Count: 3]	chr3:63,099,793-63,187,635 chr3:63,100,016-63,187,635 chr3:63,099,356-63,187,635	NM_008604 NM_001289462 NM_001289463	Membrane metallo endopeptidase, neprilysin	metalloendopeptidase activity (GO:0004222); obsolete neprilysin activity (GO:0004245); obsolete membrane fraction (GO:0005624); plasma membrane (GO:0005886); proteolysis (GO:0006508); peptide metabolic process (GO:0006518); peptidase activity (GO:0008233); metallopeptidase activity (GO:0008237); zinc ion binding (GO:0008270); membrane (GO:0016020); integral component of membrane (GO:0016021); hyd…	Mme	RefSeq	0.488769	-2.04596	4.89018	2.30009	1.60995e-18	Female	no_response	none
MMRN2	[TAD2764_chr14],[Plus]	chr14:35,188,689-35,217,472	NM_153127	Multimerin 2, multimerin-2 precursor	extracellular region (GO:0005576); (GO:0005578); basement membrane (GO:0005604)	Mmrn2	RefSeq	0.642109	-1.55737	2.99817	1.85376	2.7421e-06	Female	no_response	none
MPC1	[TAD3148_chr17],[Plus]	chr17:8,476,677-8,490,526	NM_018819			Mpc1	RefSeq	0.606395	-1.64909	78.8132	46.0052	6.83184e-10	Female	no_response	none
MROH6	[TAD2961_chr15],[Minus]	chr15:75,713,363-75,719,153	NM_001282443			Mroh6	RefSeq	0.495185	-2.01945	0.387184	0.187198	0.000980022	Female	class_II	IIB
MS4A4D	[TAD3425_chr19],[Plus]	chr19:11,611,338-11,632,956	NM_025658	Membrane-spanning 4-domains, subfamily A, member 4D, membrane-spanning 4-domains subfamily A member 4D	molecular_function (GO:0003674); cellular_component (GO:0005575); signal transduction (GO:0007165); biological_process (GO:0008150); membrane (GO:0016020); integral component of membrane (GO:0016021)	Ms4a4d	RefSeq	0.630266	-1.58663	1.14097	0.690069	0.0288603	Female	no_response	none
MS4A6C	[TAD3425_chr19],[Plus],[Overlapping_Isoform_Count: 2]	chr19:11,543,857-11,556,686 chr19:11,543,857-11,547,226	NM_028595 NM_001166376	Membrane-spanning 4-domains, subfamily A, member 6C, membrane-spanning 4-domains subfamily A member 6C isoform 1;membrane-spanning 4-domains subfamily A member 6C isoform 2	signal transduction (GO:0007165); membrane (GO:0016020); integral component of membrane (GO:0016021)	Ms4a6c	RefSeq	0.577157	-1.73263	1.18572	0.653374	0.034427	Female	no_response	none
MYO1F	[TAD3191_chr17],[Plus]	chr17:33,692,651-33,744,709	NM_053214	Myosin IF, unconventional myosin-If	nucleotide binding (GO:0000166); neutrophil mediated immunity (GO:0002446); molecular_function (GO:0003674); motor activity (GO:0003774); actin binding (GO:0003779); calmodulin binding (GO:0005516); ATP binding (GO:0005524); cytoskeleton (GO:0005856); cytoskeleton organization (GO:0007010); negative regulation of cell adhesion (GO:0007162); myosin complex (GO:0016459); positive regulation of cell…	Myo1f	RefSeq	0.53506	-1.86895	0.628611	0.32652	0.00111624	Female	class_II	IIA
N4BP2L1	[TAD1166_chr5],[Minus]	chr5:151,374,217-151,397,100	NM_133898	NEDD4 binding protein 2-like 1, NEDD4-binding protein 2-like 1	molecular_function (GO:0003674); cellular_component (GO:0005575); biological_process (GO:0008150)	N4bp2l1	RefSeq	0.660352	-1.51434	10.5107	6.6653	0.000545665	Female	no_response	none
NCALD	[TAD2909_chr15],[Minus],[Overlapping_Isoform_Count: 4],[Overlaps with:Gm15941]	chr15:37,295,929-37,722,183 chr15:37,295,929-37,389,137 chr15:37,295,929-37,721,755	NM_134094 NM_001170867 NM_001170868 NM_001170866	Neurocalcin delta, neurocalcin-delta	molecular_function (GO:0003674); calcium ion binding (GO:0005509); cellular_component (GO:0005575); biological_process (GO:0008150)	Ncald	RefSeq	0.568725	-1.75832	2.41993	1.32591	3.90381e-08	Female	no_response	none
nc_as_c10_9385	[TAD2162_chr10],[Minus],[Exon count:4],[Isoform count3],[Longest ORF:86 aa]	chr10:126,586,108-126,603,770	NONMMUG004986.2 NONMMUG004985.2 NONMMUG051660.1 NONMMUT008062.2 NONMMUT008063.2 NONMMUT083003.1 NONMMUT083004.1				lncRNA	0.405105	-2.4685	3.28786	1.35486	2.73884e-06	Female	class_II	IIB
nc_as_c11_10058	[TAD2329_chr11],[Plus],[Exon count:2],[Isoform count3],[Longest ORF:71 aa]	chr11:98,924,231-98,930,947					lncRNA	0.336416	-2.97251	0.339362	0.116776	0.0210095	Female	no_response	none
nc_as_c11_10170	[TAD2365_chr11],[Minus],[Exon count:2],[Isoform count5],[Overlapping SmallRNA:Mir3968],[Longest ORF:59 aa]	chr11:115,302,947-115,309,519	NR_039549			Mir3968	lncRNA	0.395909	-2.52584	4.40446	1.77935	8.20544e-07	Female	class_II	IIA
nc_as_c14_11846	[TAD2732.1_chr14],[Plus],[Exon count:2],[Isoform count1],[Longest ORF:46 aa]	chr14:19,044,396-19,047,998					lncRNA	0.276093	-3.62197	0.409192	0.112681	0.000414404	Female	class_II	IIB
nc_as_c15_12679	[TAD2960_chr15],[Minus],[Exon count:4],[Isoform count6],[Overlapping LncRNA:ncRNA_intra_chr15_12674;ncRNA_intra_chr15_12676;ncRNA_as_chr15_12680;ncRNA_as_chr15_12682, Pseudogene:;Gm28117],[Longest ORF:105 aa]	chr15:74,989,124-75,046,673	NONMMUG014792.2 NONMMUT023958.2				lncRNA	0.398219	-2.51118	2.12975	0.860843	0.00788774	Female	no_response	none
nc_as_c15_12957	[TAD3006_chr15],[Minus],[Exon count:4],[Isoform count2],[Longest ORF:57 aa]	chr15:103,116,797-103,120,774	NONMMUG015580.2 NONMMUT025178.2				lncRNA	0.167052	-5.98615	0.733627	0.121866	1.40098e-07	Female	no_response	none
nc_as_c16_13512	[TAD3129_chr16],[Minus],[Exon count:3],[Isoform count2],[Longest ORF:98 aa]	chr16:93,788,097-93,795,122	NONMMUG017219.2 NONMMUT027783.2 NONMMUT100484.1				lncRNA	0.350243	-2.85516	0.299927	0.106278	0.00405844	Female	class_II	IIA
nc_as_c17_13628	[TAD3148_chr17],[Minus],[Exon count:5],[Isoform count4],[Longest ORF:83 aa],[Old lncRNA ID:LiverLincs_chr17_4324]	chr17:8,449,900-8,465,382	NONMMUG063662.1 NONMMUT101728.1				lncRNA	0.146042	-6.84734	0.263711	0.0373484	0.00216234	Female	no_response	none
nc_as_c1_757	[TAD206_chr1],[Plus],[Exon count:2],[Isoform count2],[Longest ORF:61 aa]	chr1:164,962,598-164,997,256	NONMMUG002260.2 NONMMUT076682.1 NONMMUT003509.2				lncRNA	0.0539889	-18.5223	0.343527	0.0159893	8.59077e-08	Female	class_I	IA
nc_as_c2_1125	[TAD302_chr2],[Plus],[Exon count:2],[Isoform count1],[Longest ORF:69 aa]	chr2:24,945,406-24,949,517					lncRNA	0.442111	-2.26187	2.92676	1.30938	0.00236671	Female	no_response	none
nc_as_c2_1343	[TAD357_chr2],[Plus],[Exon count:7],[Isoform count23],[Longest ORF:126 aa]	chr2:65,391,852-65,419,227	NONMMUG023223.2 NONMMUT037631.2				lncRNA	0.38066	-2.62701	1.05511	0.406513	1.68364e-08	Female	class_II	IIB
nc_as_c4_3230	[TAD811_chr4],[Minus],[Exon count:12],[Isoform count1],[Longest ORF:71 aa]	chr4:49,216,420-49,262,626	NONMMUG073196.1 NONMMUT116674.1 NONMMUT116675.1				lncRNA	0.40137	-2.49147	1.67553	0.680018	9.08938e-06	Female	class_II	IIB
nc_as_c4_3843	[TAD966_chr4],[Plus],[Exon count:3],[Isoform count3],[Longest ORF:111 aa]	chr4:147,520,177-147,525,289					lncRNA	0.474279	-2.10846	1.12164	0.543516	0.00229369	Female	no_response	none
nc_as_c5_4731	[TAD1155_chr5],[Plus],[Exon count:2],[Isoform count9],[Overlapping LncRNA:ncRNA_as_chr5_4727;ncRNA_as_chr5_4729;ncRNA_as_chr5_4733;ncRNA_as_chr5_4737;ncRNA_as_chr5_4742],[Longest ORF:66 aa]	chr5:146,229,281-146,407,659	NONMMUG075096.1 NONMMUT119748.1				lncRNA	0.00488584	-204.673	0.866343	0.00295998	2.02476e-42	Female	class_I	IA
nc_as_c5_4733	[TAD1156_chr5],[Plus],[Exon count:3],[Isoform count1],[Overlapping LncRNA:ncRNA_as_chr5_4727;ncRNA_as_chr5_4729;ncRNA_as_chr5_4731;ncRNA_as_chr5_4737;ncRNA_as_chr5_4742;ncRNA_as_chr5_4743;ncRNA_as_chr5_4744;ncRNA_as_chr5_4745],[Longest ORF:54 aa]	chr5:146,382,913-146,588,841					lncRNA	0.00189915	-526.55	0.776504	0	2.79901e-35	Female	class_I	IA
nc_as_c5_4745	[TAD1156_chr5],[Plus],[Exon count:2],[Isoform count9],[Overlapping LncRNA:ncRNA_as_chr5_4733;ncRNA_as_chr5_4737;ncRNA_as_chr5_4742;ncRNA_as_chr5_4743;ncRNA_as_chr5_4744],[Longest ORF:70 aa]	chr5:146,525,947-146,612,187					lncRNA	0.0115607	-86.4998	0.729375	0.00766442	2.51029e-38	Female	class_I	IA
nc_as_c7_6007	[TAD1421_chr7],[Minus],[Exon count:5],[Isoform count3],[Longest ORF:122 aa]	chr7:27,089,230-27,099,814	NONMMUG037488.2 NONMMUT060315.2				lncRNA	0.0224623	-44.519	3.23786	0.0753861	8.21794e-47	Female	class_II	IIA
nc_as_c8_7290	[TAD1708_chr8],[Plus],[Exon count:4],[Isoform count11],[Longest ORF:153 aa]	chr8:91,557,422-91,596,447	NONMMUG041226.2 NONMMUG081054.1 NONMMUG081055.1 NONMMUG081056.1 NONMMUG081057.1 NONMMUG081058.1 NONMMUG081059.1 NONMMUG081060.1 NONMMUT066596.2 NONMMUT066597.2 NONMMUT066599.2 NONMMUT066598.2 NONMMUT066600.2 NONMMUT066601.2 NONMMUT066602.2 NONMMUT066625.2 NONMMUT066624.2 NONMMUT066626.2 NONMMUT129101.1 NONMMUT129102.1 NONMMUT129103.1 NONMMUT129104.1 NONMMUT129105.1 NONMMUT129106.1 NONMMUT129107.1…				lncRNA	0.499004	-2.00399	0.63236	0.322127	0.000341719	Female	no_response	none
nc_as_c8_7332	[TAD1715_chr8],[Minus],[Exon count:2],[Isoform count3],[Longest ORF:149 aa]	chr8:96,696,680-96,699,837	NONMMUG041315.2 NONMMUT066755.2 NONMMUT131473.1				lncRNA	0.337975	-2.9588	0.497884	0.170298	0.00249249	Female	class_II	IIB
nc_as_c9_7824	[TAD1802_chr9],[Minus],[Exon count:3],[Isoform count1],[Longest ORF:104 aa]	chr9:34,822,215-34,826,459	NONMMUG084510.1 NONMMUT134085.1				lncRNA	0.230201	-4.34404	0.550057	0.122256	0.0175959	Female	no_response	none
nc_as_cx_15546	[TAD3617_chrXend],[Minus],[Exon count:4],[Isoform count5],[Longest ORF:102 aa]	chrX:166,411,355-166,421,974	NR_029457 NONMMUG046370.2 NONMMUT074720.2 NONMMUT074721.2 NONMMUT074723.2 NONMMUT137627.1 NONMMUT137628.1	RIKEN cDNA G530011O06 gene,	molecular_function (GO:0003674); cellular_component (GO:0005575); biological_process (GO:0008150)	G530011O06Rik	lncRNA	0.317888	-3.14577	4.5338	1.45991	2.0883e-06	Female	no_response	none
NCF1	[TAD1129_chr5],[Minus],[Overlapping_Isoform_Count: 3]	chr5:134,695,922-134,705,495 chr5:134,696,128-134,705,495	NM_010876 NM_001286037 NR_104383	Neutrophil cytosolic factor 1, neutrophil cytosol factor 1 isoform a;neutrophil cytosol factor 1 isoform b	response to yeast (GO:0001878); leukocyte mediated cytotoxicity (GO:0001909); respiratory burst involved in defense response (GO:0002679); protein binding (GO:0005515); obsolete membrane fraction (GO:0005624); cytoplasm (GO:0005737); rough endoplasmic reticulum (GO:0005791); Golgi apparatus (GO:0005794); cytosol (GO:0005829); plasma membrane (GO:0005886); obsolete electron transport (GO:0006118);…	Ncf1	RefSeq	0.615864	-1.62373	0.941684	0.553824	0.0061098	Female	no_response	none
NCF2	[TAD180_chr1],[Plus]	chr1:154,655,019-154,684,120	NM_010877	Neutrophil cytosolic factor 2, neutrophil cytosol factor 2	acrosomal vesicle (GO:0001669); binding (GO:0005488); protein binding (GO:0005515); obsolete membrane fraction (GO:0005624); cytoplasm (GO:0005737); cytosol (GO:0005829); NADP catabolic process (GO:0006742); superoxide metabolic process (GO:0006801); response to glucose (GO:0009749); response to organic cyclic compound (GO:0014070); superoxide-generating NADPH oxidase activity (GO:0016175); respo…	Ncf2	RefSeq	0.637	-1.56986	0.992026	0.621166	0.040358	Female	no_response	none
NCF4	[TAD2967_chr15],[Plus]	chr15:78,075,240-78,093,010	NM_008677	Neutrophil cytosolic factor 4, neutrophil cytosol factor 4	protein binding (GO:0005515); cytoplasm (GO:0005737); obsolete electron transport (GO:0006118); cell communication (GO:0007154); phosphatidylinositol binding (GO:0035091)	Ncf4	RefSeq	0.542855	-1.84211	1.15353	0.611774	0.0240836	Female	class_II	IIA
nc_inter_c10_9183	[TAD2112_chr10],[Plus],[Exon count:5],[Isoform count2],[Longest ORF:82 aa]	chr10:94,880,009-94,891,274	NR_045338 NR_045339 NONMMUG004473.2 NONMMUT006956.2 NONMMUT006957.2 NONMMUT080713.1 NONMMUT080714.1	RIKEN cDNA 5730420D15 gene,	molecular_function (GO:0003674); cellular_component (GO:0005575); biological_process (GO:0008150)	5730420D15Rik	lncRNA	0.371692	-2.6904	3.56591	1.3333	0.000119776	Female	class_I	IA
nc_inter_c10_9222	[TAD2120_chr10],[Minus],[Exon count:2],[Isoform count1],[Longest ORF:75 aa],[Old lncRNA ID:LiverLincs_chr10_2877]	chr10:98,730,134-98,733,144					lncRNA	0.116735	-8.56639	0.367365	0.0394352	0.000891971	Female	class_II	IIA
nc_inter_c10_9223	[TAD2120_chr10],[Minus],[Exon count:3],[Isoform count6],[Longest ORF:152 aa]	chr10:98,912,860-98,932,132	NONMMUG004540.2 NONMMUT007091.2 NONMMUT007092.2 NONMMUT007093.2 NONMMUT007094.2 NONMMUT007095.2				lncRNA	0.441142	-2.26685	0.337462	0.152313	0.000130662	Female	class_II	IIB
nc_inter_c10_9224	[TAD2120_chr10],[Plus],[Exon count:3],[Isoform count9],[Longest ORF:102 aa],[Old lncRNA ID:LiverLincs_chr10_2878;LiverLincs_chr10_2879;LiverLincs_chr10_2878;;LiverLincs_chr10_2879]	chr10:98,922,005-98,953,466	NONMMUG004541.2 NONMMUT007096.2 NONMMUT007097.2 NONMMUT007098.2 NONMMUT007099.2 NONMMUT080803.1 NONMMUT080804.1 NONMMUT080805.1 NONMMUT080806.1				lncRNA	0.452152	-2.21165	1.03859	0.479011	0.000348337	Female	class_II	IIB
nc_inter_c12_10681	[TAD2472_chr12],[Minus],[Exon count:3],[Isoform count5],[Longest ORF:92 aa],[Old lncRNA ID:LiverLincs_chr12_3397]	chr12:78,139,528-78,144,828	NONMMUG009339.2 NONMMUT014735.2 NONMMUT088628.1 NONMMUT088629.1				lncRNA	0.110998	-9.00921	0.770578	0.0862157	2.3234e-16	Female	no_response	none
nc_inter_c12_10922	[TAD2521_chr12],[Plus],[Exon count:10],[Isoform count78],[Overlapping SmallRNA:Mir1906-1;Mir770;Mir673;Mir493;Mir337;Mir540;Mir665;Mir3070a;Mir3070b],[Longest ORF:213 aa],[Old lncRNA ID:LiverLincs_chr12_3471]	chr12:110,779,088-110,827,825	NR_027651 NR_027652 NR_003633 NR_037313 NR_035440 NR_030427 NR_030438 NR_030573 NR_029765 NR_030260 NR_030425 NR_037230 NR_037231 NONMMUG009963.2 NONMMUG009962.2 NONMMUG054625.1 NONMMUT015695.2 NONMMUT015694.2 NONMMUT015696.2 NONMMUT015697.2 NONMMUT015698.2 NONMMUT015699.2 NONMMUT015700.2 NONMMUT015703.2 NONMMUT015706.2 NONMMUT015707.2 NONMMUT015709.2 NONMMUT015708.2 NONMMUT015710.2 NONMMUT015711…	Maternally expressed 3,		Meg3 Mir1906-2 Mir1906-1 Mir770 Mir673 Mir493 Mir337 Mir540 Mir665 Mir3070a Mir3070b	lncRNA	0.488444	-2.04732	3.13805	1.56277	0.000928993	Female	class_II	IIA
nc_inter_c1_290	[TAD84_chr1],[Plus],[Exon count:4],[Isoform count11],[Longest ORF:137 aa],[Old lncRNA ID:LiverLincs_chr1_106]	chr1:71,860,185-71,888,434					lncRNA	0.432942	-2.30978	0.714001	0.31345	0.0109246	Female	no_response	none
nc_inter_c13_11189	[TAD2584_chr13],[Plus],[Exon count:3],[Isoform count1],[Longest ORF:96 aa],[Old lncRNA ID:LiverLincs_chr13_3543]	chr13:35,055,917-35,067,304	NONMMUG010675.2 NONMMUG010674.2 NONMMUT016980.2 NONMMUT016981.2 NONMMUT016982.2 NONMMUT016983.2 NONMMUT089498.1				lncRNA	0.013141	-76.0978	0.781335	0.0098713	2.33618e-55	Female	no_response	none
nc_inter_c13_11437	[TAD2634_chr13],[Minus],[Exon count:4],[Isoform count14],[Longest ORF:96 aa],[Old lncRNA ID:LiverLincs_chr13_3626;]	chr13:60,569,089-60,582,351	NONMMUG011182.2 NONMMUG011183.2 NONMMUG057028.1 NONMMUG057029.1 NONMMUT017836.2 NONMMUT017837.2 NONMMUT091557.1 NONMMUT091558.1 NONMMUT091559.1				lncRNA	0.233658	-4.27977	3.0617	0.729186	3.95563e-12	Female	class_I	IB
nc_inter_c13_11438	[TAD2634_chr13],[Minus],[Exon count:6],[Isoform count13],[Longest ORF:121 aa]	chr13:60,584,864-60,590,263	NONMMUG011184.2 NONMMUT017838.2 NONMMUT091560.1 NONMMUT091561.1 NONMMUT091562.1 NONMMUT091563.1				lncRNA	0.316914	-3.15543	4.47569	1.44476	6.52994e-09	Female	class_I	IB
nc_inter_c1_341	[TAD103_chr1],[Plus],[Exon count:3],[Isoform count3],[No Intron-only sequences],[Overlapping Pseudogene:Gm15433],[Longest ORF:296 aa]	chr1:84,957,576-84,962,740	NONMMUG001180.2 NONMMUT001747.2				lncRNA	0.37535	-2.66418	0.923788	0.35433	4.41836e-05	Female	no_response	none
nc_inter_c14_11978	[TAD2772_chr14],[Plus],[Exon count:7],[Isoform count5],[Longest ORF:135 aa],[Old lncRNA ID:LiverLincs_chr14_3785]	chr14:46,155,074-46,189,454	NR_045809 NONMMUG012787.2 NONMMUT020569.2 NONMMUT092766.1 NONMMUG012789.2 NONMMUG057817.1 NONMMUG057818.1 NONMMUG057819.1 NONMMUG057820.1 NONMMUT020571.2 NONMMUT020572.2 NONMMUT020573.2 NONMMUT020574.2 NONMMUT020575.2 NONMMUT092767.1 NONMMUT092768.1 NONMMUT092769.1 NONMMUT092770.1 NONMMUT092771.1 NONMMUT092772.1	RIKEN cDNA 4930527F14 gene,	molecular_function (GO:0003674); cellular_component (GO:0005575); biological_process (GO:0008150)	4930527F14Rik	lncRNA	0.426764	-2.34322	0.461082	0.199088	0.0373776	Female	no_response	none
nc_inter_c14_12237	[TAD2841_chr14],[Minus],[Exon count:2],[Isoform count1],[Longest ORF:28 aa]	chr14:100,606,501-100,607,641	NONMMUG013667.2 NONMMUT022000.2 NONMMUG013668.2 NONMMUT022001.2 NONMMUG059201.1 NONMMUT094822.1 NONMMUT094823.1				lncRNA	0.277935	-3.59797	1.77167	0.486455	0.0050609	Female	no_response	none
nc_inter_c15_12585	[TAD2939_chr15],[Minus],[Exon count:2],[Isoform count1],[Longest ORF:69 aa],[Old lncRNA ID:LiverLincs_chr15_3969]	chr15:60,696,171-60,702,708	NONMMUG014633.2 NONMMUT023665.2				lncRNA	0.0142729	-70.0629	1.99126	0.025803	6.71298e-26	Female	class_I	IA
nc_inter_c15_12683	[TAD2960_chr15],[Minus],[Exon count:3],[Isoform count2],[Overlapping LncRNA:ncRNA_as_chr15_12680;ncRNA_as_chr15_12682, Pseudogene:Gm3454],[Longest ORF:48 aa]	chr15:75,136,413-75,143,346					lncRNA	0.462705	-2.1612	0.987193	0.457743	0.0398122	Female	no_response	none
nc_inter_c15_12684	[TAD2960_chr15],[Minus],[Exon count:4],[Isoform count8],[Overlapping Pseudogene:9030619P08Rik],[Longest ORF:110 aa]	chr15:75,245,949-75,262,384	NR_108041 NONMMUG060873.1 NONMMUT097366.1	RIKEN cDNA 9030619P08 gene,	molecular_function (GO:0003674); cellular_component (GO:0005575); biological_process (GO:0008150)	9030619P08Rik	lncRNA	0.235817	-4.24057	39.5733	9.51572	1.25475e-24	Female	class_I	IB
nc_inter_c16_13062	[TAD3018_chr16],[Plus],[Exon count:3],[Isoform count1],[Longest ORF:57 aa],[Old lncRNA ID:LiverLincs_chr16_4136]	chr16:11,008,991-11,015,277	NR_040518 NONMMUG015774.2 NONMMUT025483.2 NONMMUT097973.1 NONMMUT097974.1	predicted gene 4262,	molecular_function (GO:0003674); cellular_component (GO:0005575); biological_process (GO:0008150)	Gm4262	lncRNA	0.363079	-2.75422	0.638628	0.233789	0.0215751	Female	no_response	none
nc_inter_c16_13225	[TAD3060_chr16],[Plus],[Exon count:6],[Isoform count7],[Longest ORF:93 aa],[Old lncRNA ID:LiverLincs_chr16_4198]	chr16:32,689,202-32,707,365					lncRNA	0.319935	-3.12564	0.348679	0.113339	0.000551607	Female	no_response	none
nc_inter_c16_13428	[TAD3109_chr16],[Minus],[Exon count:4],[Isoform count9],[Longest ORF:186 aa],[Old lncRNA ID:LiverLincs_chr16_4263]	chr16:76,215,834-76,224,748					lncRNA	0.0908712	-11.0046	0.264509	0.0236614	9.86454e-13	Female	no_response	none
nc_inter_c16_13510	[TAD3128_chr16],[Plus],[Exon count:2],[Isoform count4],[No Intron-only sequences],[Overlapping SmallRNA:Mir802],[Longest ORF:87 aa],[Old lncRNA ID:LiverLincs_chr16_4287]	chr16:93,368,514-93,371,903	NR_030429 NONMMUG017206.2 NONMMUT027765.2 NONMMUT099289.1			Mir802	lncRNA	0.351529	-2.84472	3.06732	1.10296	2.90852e-05	Female	class_II	IIB
nc_inter_c18_14392	[TAD3307_chr18],[Plus],[Exon count:3],[Isoform count2],[Longest ORF:75 aa],[Old lncRNA ID:LiverLincs_chr18_4576]	chr18:32,745,158-32,751,185	NONMMUG064562.1 NONMMUT103259.1 NONMMUT103260.1				lncRNA	0.288423	-3.46712	0.284516	0.0810312	0.0056906	Female	no_response	none
nc_inter_c18_14432	[TAD3321_chr18],[Plus],[Exon count:5],[Isoform count9],[Longest ORF:118 aa],[Old lncRNA ID:LiverLincs_chr18_4593]	chr18:38,643,264-38,647,175	NONMMUG019751.2 NONMMUT032103.2 NONMMUT032104.2 NONMMUT103397.1 NONMMUT103398.1 NONMMUT103399.1				lncRNA	0.264016	-3.78765	0.599103	0.15742	8.60074e-06	Female	no_response	none
nc_inter_c18_14590	[TAD3360_chr18],[Minus],[Exon count:2],[Isoform count2],[No Intron-only sequences],[Longest ORF:139 aa]	chr18:64,482,504-64,499,809	NONMMUG065530.1 NONMMUT104736.1				lncRNA	0.458799	-2.1796	1.3802	0.643525	7.96637e-09	Female	class_II	IIA
nc_inter_c19_14770	[TAD3413_chr19],[Plus],[Exon count:2],[Isoform count1],[Longest ORF:66 aa]	chr19:7,918,175-7,923,575					lncRNA	0.0448642	-22.2895	6.76451	0.299571	5.04149e-64	Female	class_II	IIB
nc_inter_c19_14802	[TAD3424_chr19],[Minus],[Exon count:2],[Isoform count1],[Longest ORF:86 aa],[Old lncRNA ID:LiverLincs_chr19_4714]	chr19:11,106,426-11,110,323	NONMMUG020838.2 NONMMUT105895.1 NONMMUT105896.1				lncRNA	0.406113	-2.46237	0.532516	0.221091	0.0150032	Female	no_response	none
nc_inter_c1_977	[TAD257_chr1],[Minus],[Exon count:2],[Isoform count2],[Longest ORF:116 aa],[Old lncRNA ID:LiverLincs_chr1_312]	chr1:191,863,138-191,869,285	NONMMUG002788.2 NONMMUT004304.2				lncRNA	0.353969	-2.8251	0.420754	0.151164	0.0161896	Female	no_response	none
nc_inter_c2_1422	[TAD360_chr2],[Plus],[Exon count:2],[Isoform count1],[Longest ORF:91 aa]	chr2:67,833,076-67,840,328	NONMMUG023252.2 NONMMUT037670.2 NONMMUT037671.2 NONMMUT037685.2 NONMMUT037687.2				lncRNA	0.434447	-2.30178	3.8673	1.70325	0.0015613	Female	no_response	none
nc_inter_c2_1424	[TAD360_chr2],[Plus],[Exon count:2],[Isoform count1],[Longest ORF:68 aa]	chr2:67,853,998-67,860,427	NONMMUG023252.2 NONMMUT037670.2 NONMMUT037671.2 NONMMUG023263.2 NONMMUT037688.2				lncRNA	0.40268	-2.48336	3.86039	1.57777	0.000882574	Female	no_response	none
nc_inter_c2_1430	[TAD362_chr2],[Plus],[Exon count:3],[Isoform count4],[No Intron-only sequences],[Longest ORF:87 aa],[Old lncRNA ID:LiverLincs_chr2_475]	chr2:68,634,392-68,641,131					lncRNA	0.21651	-4.61871	2.49931	0.552657	3.27975e-24	Female	class_II	IIB
nc_inter_c2_1432	[TAD362_chr2],[Minus],[Exon count:5],[Isoform count25],[Longest ORF:156 aa]	chr2:68,652,364-68,683,546	NONMMUG023274.2 NONMMUT037701.2 NONMMUT107247.1 NONMMUT107249.1				lncRNA	0.264829	-3.77602	0.867008	0.233653	2.06436e-17	Female	class_II	IIB
nc_inter_c2_2012	[TAD522_chr2],[Minus],[Exon count:3],[Isoform count6],[No Intron-only sequences],[Longest ORF:151 aa]	chr2:167,652,653-167,660,376	NONMMUG025579.2 NONMMUT041319.2 NONMMUT110158.1				lncRNA	0.347153	-2.88058	0.829159	0.293809	0.00110331	Female	no_response	none
nc_inter_c2_2016	[TAD522_chr2],[Minus],[Exon count:3],[Isoform count7],[Longest ORF:190 aa]	chr2:167,678,088-167,693,755	NONMMUG068887.1 NONMMUT110163.1				lncRNA	0.478545	-2.08967	0.301474	0.146921	0.000311206	Female	no_response	none
nc_inter_c2_2017	[TAD522_chr2],[Plus],[Exon count:5],[Isoform count16],[No Intron-only sequences],[Longest ORF:156 aa],[Old lncRNA ID:LiverLincs_chr2_686]	chr2:167,679,265-167,693,755	NONMMUG025583.2 NONMMUG025582.2 NONMMUT041322.2 NONMMUT041323.2 NONMMUT041324.2 NONMMUT108351.1 NONMMUT108352.1				lncRNA	0.402155	-2.4866	0.432792	0.177171	3.15747e-08	Female	no_response	none
nc_inter_c2_2085	[TAD541_chr2],[Plus],[Exon count:4],[Isoform count5],[Longest ORF:46 aa],[Old lncRNA ID:LiverLincs_chr2_717]	chr2:178,226,703-178,230,962	NONMMUG025844.2 NONMMUT041769.2				lncRNA	0.00754129	-132.603	0.465896	0	0.0242838	Female	no_response	none
nc_inter_c3_2743	[TAD701_chr3],[Minus],[Exon count:3],[Isoform count1],[Longest ORF:90 aa],[Old lncRNA ID:LiverLincs_chr3_903]	chr3:115,339,906-115,344,473	NONMMUG027707.2 NONMMUT044864.2 NONMMUT044865.2 NONMMUT044866.2 NONMMUT044867.2 NONMMUT113854.1 NONMMUT113855.1				lncRNA	0.262694	-3.80671	2.2106	0.587605	9.44738e-17	Female	class_II	IIB
nc_inter_c3_2915	[TAD733_chr3],[Minus],[Exon count:3],[Isoform count3],[Longest ORF:43 aa],[Old lncRNA ID:LiverLincs_chr3_951]	chr3:133,452,176-133,496,100	NONMMUG027996.2 NONMMUG071634.1 NONMMUG071635.1 NONMMUT114202.1 NONMMUT114203.1 NONMMUT114204.1 NONMMUT114205.1				lncRNA	0.157778	-6.33803	9.65035	1.54373	8.49157e-21	Female	class_I	IB
nc_inter_c3_2937	[TAD740_chr3],[Plus],[Exon count:2],[Isoform count3],[Longest ORF:81 aa]	chr3:137,923,913-137,940,476					lncRNA	0.0520633	-19.2074	1.00329	0.0522245	4.01487e-40	Female	class_II	IIB
nc_inter_c3_3002	[TAD766_chr3],[Minus],[Exon count:3],[Isoform count2],[Longest ORF:58 aa],[Old lncRNA ID:LiverLincs_chr3_986]	chr3:157,383,424-157,400,836	NONMMUG028343.2 NONMMUG071805.1 NONMMUT045912.2 NONMMUT045913.2 NONMMUT045914.2 NONMMUT114514.1 NONMMUT114515.1				lncRNA	0.246088	-4.06358	0.611869	0.144143	0.00162382	Female	no_response	none
nc_inter_c4_3141	[TAD792_chr4],[Minus],[Exon count:3],[Isoform count2],[Longest ORF:46 aa],[Old lncRNA ID:LiverLincs_chr4_1039]	chr4:34,857,038-34,858,730	NR_040652 NONMMUG028868.2 NONMMUT046691.2 NONMMUT046692.2			Platr9	lncRNA	0.0665741	-15.0208	0.359283	0.0178858	0.00155596	Female	no_response	none
nc_inter_c4_3177	[TAD801_chr4],[Plus],[Exon count:2],[Isoform count1],[Longest ORF:68 aa],[Old lncRNA ID:LiverLincs_chr4_1052]	chr4:43,442,450-43,444,983					lncRNA	0.474577	-2.10714	0.680564	0.326327	0.0421097	Female	no_response	none
nc_inter_c4_3344	[TAD846_chr4],[Plus],[Exon count:2],[Isoform count1],[Longest ORF:66 aa],[Old lncRNA ID:LiverLincs_chr4_1127]	chr4:80,895,373-80,897,540	NONMMUG029650.2 NONMMUT047836.2				lncRNA	0.305343	-3.275	1.1856	0.365224	0.00488399	Female	class_II	IIA
nc_inter_c5_4115	[TAD1004_chr5],[Minus],[Exon count:3],[Isoform count4],[No Intron-only sequences],[Longest ORF:200 aa]	chr5:33,789,074-33,802,388	NONMMUG032167.2 NONMMUT051869.2 NONMMUT051870.2				lncRNA	0.0663997	-15.0603	5.06028	0.342629	4.50342e-28	Female	class_I	IA
nc_inter_c5_4116	[TAD1004_chr5],[Plus],[Exon count:3],[Isoform count5],[Longest ORF:128 aa],[Old lncRNA ID:LiverLincs_chr5_1361]	chr5:33,807,939-33,813,770	NONMMUG032168.2 NONMMUT051871.2 NONMMUT118206.1				lncRNA	0.215588	-4.63848	1.76051	0.385887	1.2931e-07	Female	class_I	IA
nc_inter_c5_4365	[TAD1063_chr5],[Plus],[Exon count:2],[Isoform count2],[No Intron-only sequences],[Longest ORF:118 aa]	chr5:89,924,357-89,931,935					lncRNA	0.338283	-2.9561	0.423843	0.146576	5.53593e-06	Female	class_II	IIA
nc_inter_c5_4527	[TAD1094_chr5],[Plus],[Exon count:9],[Isoform count3],[Longest ORF:114 aa],[Old lncRNA ID:LiverLincs_chr5_1481]	chr5:110,943,918-110,954,998	NR_102290 NONMMUG033354.2 NONMMUT053767.2 NONMMUT053768.2 NONMMUT053769.2 NONMMUT053770.2 NONMMUT053772.2 NONMMUT119133.1 NONMMUT119134.1	RIKEN cDNA A630023P12 gene,		A630023P12Rik	lncRNA	0.247305	-4.04359	0.787957	0.196088	0.000276927	Female	no_response	none
nc_inter_c5_4763	[TAD1160_chr5],[Minus],[Exon count:3],[Isoform count2],[Longest ORF:122 aa],[Old lncRNA ID:LiverLincs_chr5_1557]	chr5:147,446,801-147,457,057	NONMMUG076276.1 NONMMUT121639.1 NONMMUT121640.1 NONMMUT121641.1				lncRNA	0.253884	-3.93881	3.86556	0.998322	3.91554e-08	Female	class_I	IB
nc_inter_c5_4764	[TAD1160_chr5],[Minus],[Exon count:5],[Isoform count12],[Longest ORF:146 aa],[Old lncRNA ID:LiverLincs_chr5_1558]	chr5:147,457,236-147,499,111	NONMMUG034324.2 NONMMUG034325.2 NONMMUT055274.2 NONMMUT055273.2 NONMMUT055275.2 NONMMUT055278.2 NONMMUT055276.2 NONMMUT055277.2 NONMMUT055279.2 NONMMUT055280.2 NONMMUT121642.1 NONMMUT121643.1 NONMMUT121644.1 NONMMUT121645.1				lncRNA	0.275823	-3.62551	1.42693	0.400906	2.12349e-09	Female	class_I	IB
nc_inter_c6_5138	[TAD1237_chr6],[Plus],[Exon count:2],[Isoform count3],[No Intron-only sequences],[Longest ORF:234 aa],[Old lncRNA ID:LiverLincs_chr6_1718]	chr6:51,650,981-51,660,996					lncRNA	0.0968914	-10.3208	4.22921	0.419268	1.30134e-16	Female	class_I	IA
nc_inter_c6_5253	[TAD1270_chr6],[Minus],[Exon count:2],[Isoform count2],[Longest ORF:122 aa]	chr6:72,007,066-72,016,856					lncRNA	0.0782157	-12.7852	2.46597	0.193269	2.3273e-45	Female	class_I	IA
nc_inter_c6_5691	[TAD1379_chr6],[Minus],[Exon count:2],[Isoform count3],[No Intron-only sequences],[Longest ORF:66 aa],[Old lncRNA ID:LiverLincs_chr6_1886]	chr6:136,411,042-136,413,046	NONMMUG078068.1 NONMMUT124536.1				lncRNA	0.345011	-2.89846	0.501686	0.173614	0.0260222	Female	class_I	IA
nc_inter_c7_6113	[TAD1433_chr7],[Minus],[Exon count:7],[Isoform count26],[Overlapping LncRNA:ncRNA_inter_chr7_6115],[Longest ORF:88 aa],[Old lncRNA ID:LiverLincs_chr7_2013]	chr7:47,169,884-47,233,613	NONMMUG079489.1 NONMMUT126724.1				lncRNA	0.495304	-2.01896	4.94247	2.48832	1.95078e-06	Female	class_II	IIA
nc_inter_c8_6766	[TAD1610_chr8],[Plus],[Exon count:2],[Isoform count4],[Longest ORF:102 aa],[Old lncRNA ID:LiverLincs_chr8_2205]	chr8:13,506,181-13,518,542					lncRNA	0.187249	-5.34048	0.64952	0.12222	4.16551e-17	Female	class_II	IIB
nc_inter_c8_6946	[TAD1643_chr8],[Plus],[Exon count:4],[Isoform count5],[Longest ORF:147 aa],[Old lncRNA ID:LiverLincs_chr8_2263;LiverLincs_chr8_2264;LiverLincs_chr8_2264]	chr8:42,239,276-42,259,402	NONMMUG080679.1 NONMMUT128536.1 NONMMUT128537.1				lncRNA	0.392115	-2.55027	0.722997	0.287782	0.000189576	Female	no_response	none
nc_inter_c8_7105	[TAD1669_chr8],[Minus],[Exon count:5],[Isoform count17],[Longest ORF:86 aa],[Old lncRNA ID:LiverLincs_chr8_2301]	chr8:66,179,646-66,307,066	NONMMUG040711.2 NONMMUT065798.2 NONMMUT131116.1				lncRNA	0.441139	-2.26686	0.2781	0.124045	0.000153523	Female	class_I	IB
nc_inter_c8_7334	[TAD1715_chr8],[Plus],[Exon count:3],[Isoform count5],[Longest ORF:99 aa],[Old lncRNA ID:LiverLincs_chr8_2356]	chr8:96,706,994-96,712,321	NONMMUG041316.2 NONMMUT066756.2				lncRNA	0.372062	-2.68772	0.72303	0.27358	8.50292e-06	Female	class_II	IIB
nc_inter_c8_7684	[TAD1763_chr8],[Minus],[Exon count:2],[Isoform count2],[Longest ORF:144 aa]	chr8:129,407,887-129,409,550	NONMMUG041969.2 NONMMUT067788.2 NONMMUG082999.1 NONMMUT131894.1				lncRNA	0.264762	-3.77698	0.391515	0.0991211	0.0321722	Female	no_response	none
nc_inter_c9_7878	[TAD1818_chr9],[Plus],[Exon count:2],[Isoform count2],[No Intron-only sequences],[Longest ORF:102 aa],[Old lncRNA ID:LiverLincs_chr9_2496;LiverLincs_chr9_2497]	chr9:42,313,386-42,319,726	NONMMUG042566.2 NONMMUT068766.2 NONMMUT068768.2 NONMMUT068769.2 NONMMUT132444.1				lncRNA	0.282485	-3.54001	0.821613	0.234296	7.02058e-09	Female	class_I	IB
nc_inter_c9_8015	[TAD1864_chr9],[Plus],[Exon count:2],[Isoform count1],[Longest ORF:94 aa]	chr9:62,951,138-62,957,245	NONMMUG043049.2 NONMMUT069502.2 NONMMUT069503.2 NONMMUT069504.2 NONMMUT069505.2 NONMMUT132707.1 NONMMUT132710.1 NONMMUT132711.1 NONMMUT132712.1 NONMMUT132713.1 NONMMUT132714.1				lncRNA	0.298228	-3.35314	0.314593	0.0944075	0.000159563	Female	class_II	IIA
nc_inter_c9_8249	[TAD1920_chr9],[Minus],[Exon count:2],[Isoform count2],[No Intron-only sequences],[Longest ORF:107 aa],[Old lncRNA ID:LiverLincs_chr9_2641]	chr9:95,469,481-95,494,498					lncRNA	0.48311	-2.06992	1.21235	0.596712	5.14193e-10	Female	class_I	IB
nc_inter_cx_15376	[TAD3557_chrX],[Minus],[Exon count:6],[Isoform count7],[Longest ORF:110 aa],[Old lncRNA ID:LiverLincs_chrX_4890;LiverLincs_chrX_4891]	chrX:93,155,810-93,165,493	NONMMUG045419.2 NONMMUT073241.2 NONMMUT073242.2 NONMMUT073244.2 NONMMUT073243.2 NONMMUT073245.2 NONMMUT073246.2 NONMMUT073247.2 NONMMUT073249.2 NONMMUT073250.2 NONMMUT137173.1 NONMMUT137174.1 NONMMUT137175.1				lncRNA	0.479071	-2.08737	0.726087	0.349602	0.00894316	Female	no_response	none
nc_inter_cx_15394	[TAD3566_chrX],[Minus],[Exon count:10],[Isoform count12],[Longest ORF:163 aa]	chrX:100,655,410-100,678,927	NR_001463 NR_001570 NONMMUG045569.2 NONMMUT073455.2 NONMMUT073456.2 NONMMUT073459.2 NONMMUT073461.2 NONMMUT073467.2 NONMMUT137216.1 NONMMUT137217.1 NONMMUT137218.1	Inactive X specific transcripts,	chromosome (GO:0005694); dosage compensation by inactivation of X chromosome (GO:0009048)	Xist	lncRNA	0.00055862	-1790.12	244.846	0.137379	1.16456e-205	Female	no_response	none
nc_inter_cx_15549	[TAD3617_chrXend],[Plus],[Exon count:3],[Isoform count3],[Longest ORF:462 aa],[Old lncRNA ID:LiverLincs_chrX_4956]	chrX:166,438,248-166,447,046					lncRNA	0.228107	-4.38391	0.793787	0.182411	2.97392e-05	Female	class_II	IIA
nc_intra_c15_12674	[TAD2960_chr15],[Minus],[Exon count:3],[Isoform count4],[Overlapping Protein-coding:Ly6a;Ly6c1;Ly6c2, LncRNA:ncRNA_intra_chr15_12675;ncRNA_intra_chr15_12676;ncRNA_as_chr15_12679],[Longest ORF:76 aa]	chr15:74,822,413-74,997,675	NONMMUG060871.1 NONMMUT097363.1				lncRNA	0.292592	-3.41773	0.453718	0.135543	7.46647e-07	Female	no_response	none
nc_intra_c15_12675	[TAD2960_chr15],[Minus],[Exon count:2],[Isoform count4],[Overlapping Protein-coding:Ly6a;Ly6c1;Ly6c2, LncRNA:ncRNA_intra_chr15_12674;ncRNA_intra_chr15_12676, Pseudogene:;I830127L07Rik],[Longest ORF:81 aa]	chr15:74,822,872-74,973,429	NONMMUG060871.1 NONMMUT097363.1				lncRNA	0.305894	-3.2691	0.523024	0.162512	0.00471007	Female	no_response	none
nc_intra_c19_15008	[TAD3479_chr19],[Minus],[Exon count:2],[Isoform count2],[Overlapping Protein-coding:Cyp2c40;Cyp2c69, LncRNA:ncRNA_intra_chr19_15006;ncRNA_intra_chr19_15009],[Longest ORF:51 aa]	chr19:39,861,396-39,935,056					lncRNA	0.214578	-4.66031	5.12051	1.11625	0.000995962	Female	class_I	IA
nc_intra_c19_15009	[TAD3479_chr19],[Minus],[Exon count:2],[Isoform count1],[Overlapping Protein-coding:Cyp2c40;Cyp2c69, LncRNA:ncRNA_intra_chr19_15006;ncRNA_intra_chr19_15008],[Longest ORF:54 aa]	chr19:39,876,322-39,950,241					lncRNA	0.111222	-8.99104	5.53424	0.607788	4.41873e-08	Female	class_I	IA
nc_intra_c19_15014	[TAD3479_chr19],[Plus],[Exon count:2],[Isoform count1],[Overlapping Protein-coding:Cyp2c37;Cyp2c50, LncRNA:ncRNA_intra_chr19_15011],[Longest ORF:53 aa]	chr19:40,083,334-40,185,159					lncRNA	0.249263	-4.01183	4.15358	1.02455	0.000396286	Female	class_II	IIB
nc_intra_c5_4726	[TAD1155_chr5],[Minus],[Exon count:2],[Isoform count1],[Overlapping Protein-coding:Cyp3a16;Cyp3a41b;Cyp3a41a, LncRNA:ncRNA_intra_chr5_4728;ncRNA_intra_chr5_4730;ncRNA_intra_chr5_4732],[Longest ORF:85 aa]	chr5:146,226,308-146,341,912	NONMMUG034306.2 NONMMUT055245.2				lncRNA	0.0328786	-30.4149	0.393575	0	0.0261752	Female	class_I	IA
nc_intra_c5_4728	[TAD1156_chr5],[Minus],[Exon count:2],[Isoform count5],[Overlapping Protein-coding:Cyp3a16;Cyp3a41b;Cyp3a41a, LncRNA:ncRNA_intra_chr5_4726;ncRNA_intra_chr5_4730;ncRNA_intra_chr5_4732;ncRNA_intra_chr5_4734;ncRNA_intra_chr5_4735;ncRNA_intra_chr5_4736;ncRNA_intra_chr5_4738;ncRNA_intra_chr5_4739;ncRNA_intra_chr5_4740;ncRNA_intra_chr5_4741],[Longest ORF:73 aa]	chr5:146,227,188-146,406,523	NONMMUG034306.2 NONMMUT055245.2				lncRNA	0.00162919	-613.802	6.79195	0.00948977	4.82961e-152	Female	class_I	IA
nc_intra_c5_4730	[TAD1155_chr5],[Minus],[Exon count:2],[Isoform count1],[Overlapping Protein-coding:Cyp3a16;Cyp3a41b;Cyp3a41a, LncRNA:ncRNA_intra_chr5_4726;ncRNA_intra_chr5_4728;ncRNA_intra_chr5_4732],[Longest ORF:27 aa]	chr5:146,229,177-146,344,351	NONMMUG034306.2 NONMMUT055245.2				lncRNA	0.0300897	-33.234	1.45012	0	0.0140778	Female	class_I	IA
nc_intra_c5_4732	[TAD1156_chr5],[Minus],[Exon count:2],[Isoform count1],[Overlapping Protein-coding:Cyp3a41b;Cyp3a41a;Cyp3a44, LncRNA:ncRNA_intra_chr5_4726;ncRNA_intra_chr5_4728;ncRNA_intra_chr5_4730;ncRNA_intra_chr5_4734;ncRNA_intra_chr5_4735;ncRNA_intra_chr5_4736;ncRNA_intra_chr5_4738;ncRNA_intra_chr5_4739;ncRNA_intra_chr5_4740;ncRNA_intra_chr5_4741],[Longest ORF:36 aa]	chr5:146,340,359-146,612,450					lncRNA	0.00715734	-139.717	6.81533	0	1.37567e-11	Female	class_I	IA
nc_intra_c5_4734	[TAD1156_chr5],[Minus],[Exon count:2],[Isoform count2],[Overlapping Protein-coding:Cyp3a11;Cyp3a41a;Cyp3a44, LncRNA:ncRNA_intra_chr5_4728;ncRNA_intra_chr5_4732;ncRNA_intra_chr5_4735;ncRNA_intra_chr5_4736;ncRNA_intra_chr5_4738;ncRNA_intra_chr5_4739;ncRNA_intra_chr5_4740;ncRNA_intra_chr5_4741, Pseudogene:RP24-443E20.4],[Longest ORF:113 aa]	chr5:146,384,760-146,669,283					lncRNA	0.0691837	-14.4543	37.9238	2.67148	4.18605e-58	Female	class_II	IIA
nc_intra_c5_4735	[TAD1156_chr5],[Minus],[Exon count:2],[Isoform count1],[Overlapping Protein-coding:Cyp3a41a;Cyp3a44, LncRNA:ncRNA_intra_chr5_4728;ncRNA_intra_chr5_4732;ncRNA_intra_chr5_4734;ncRNA_intra_chr5_4736;ncRNA_intra_chr5_4738;ncRNA_intra_chr5_4739;ncRNA_intra_chr5_4740;ncRNA_intra_chr5_4741],[Longest ORF:8 aa]	chr5:146,387,799-146,588,574					lncRNA	0.00485233	-206.087	31.4987	0.120368	3.21499e-34	Female	class_I	IA
nc_intra_c5_4736	[TAD1156_chr5],[Minus],[Exon count:2],[Isoform count1],[Overlapping Protein-coding:Cyp3a41a;Cyp3a44, LncRNA:ncRNA_intra_chr5_4728;ncRNA_intra_chr5_4732;ncRNA_intra_chr5_4734;ncRNA_intra_chr5_4735;ncRNA_intra_chr5_4738;ncRNA_intra_chr5_4739;ncRNA_intra_chr5_4740;ncRNA_intra_chr5_4741],[Longest ORF:41 aa]	chr5:146,388,047-146,588,893					lncRNA	0.00130113	-768.561	23.4977	0	1.82046e-52	Female	class_I	IA
nc_intra_c5_4739	[TAD1156_chr5],[Minus],[Exon count:2],[Isoform count1],[Overlapping Protein-coding:Cyp3a41a, LncRNA:ncRNA_intra_chr5_4728;ncRNA_intra_chr5_4732;ncRNA_intra_chr5_4734;ncRNA_intra_chr5_4735;ncRNA_intra_chr5_4736;ncRNA_intra_chr5_4738;ncRNA_intra_chr5_4740;ncRNA_intra_chr5_4741],[Longest ORF:29 aa]	chr5:146,389,396-146,510,513					lncRNA	0.00574674	-174.012	15.9183	0.0718387	4.51603e-39	Female	class_I	IA
nc_intra_c5_4740	[TAD1156_chr5],[Minus],[Exon count:2],[Isoform count1],[Overlapping Protein-coding:Cyp3a41a;Cyp3a44, LncRNA:ncRNA_intra_chr5_4728;ncRNA_intra_chr5_4732;ncRNA_intra_chr5_4734;ncRNA_intra_chr5_4735;ncRNA_intra_chr5_4736;ncRNA_intra_chr5_4738;ncRNA_intra_chr5_4739;ncRNA_intra_chr5_4741],[Longest ORF:24 aa]	chr5:146,393,193-146,600,990					lncRNA	0.00386457	-258.761	35.0949	0.12332	1.60979e-91	Female	class_I	IA
nc_intra_c5_4741	[TAD1156_chr5],[Minus],[Exon count:2],[Isoform count2],[Overlapping Protein-coding:Cyp3a41a;Cyp3a44, LncRNA:ncRNA_intra_chr5_4728;ncRNA_intra_chr5_4732;ncRNA_intra_chr5_4734;ncRNA_intra_chr5_4735;ncRNA_intra_chr5_4736;ncRNA_intra_chr5_4738;ncRNA_intra_chr5_4739;ncRNA_intra_chr5_4740],[Longest ORF:77 aa]	chr5:146,402,364-146,611,489					lncRNA	0.00201781	-495.586	4.64041	0.00692334	8.91565e-92	Female	class_I	IA
nc_intra_c7_5920	[TAD1413_chr7],[Minus],[Exon count:2],[Isoform count1],[Overlapping Protein-coding:Sult2a1;Sult2a4],[Longest ORF:37 aa]	chr7:14,385,459-14,499,841					lncRNA	0.00307811	-324.874	4.12357	0	2.93439e-20	Female	no_response	none
nc_intra_c7_6001	[TAD1421_chr7],[Plus],[Exon count:2],[Isoform count1],[Overlapping Protein-coding:Cyp2b13;Cyp2b9],[Longest ORF:65 aa]	chr7:26,855,254-26,965,199	NONMMUG037485.2 NONMMUT060312.2				lncRNA	0.0140133	-71.3608	7.31873	0.0811083	3.70235e-20	Female	class_II	IIB
nc_intra_c8_7308	[TAD1713_chr8],[Minus],[Exon count:2],[Isoform count4],[Overlapping Protein-coding:Ces1c;Ces1b, LncRNA:ncRNA_intra_chr8_7310;ncRNA_intra_chr8_7312;ncRNA_intra_chr8_7313;ncRNA_intra_chr8_7314;ncRNA_intra_chr8_7317;ncRNA_intra_chr8_7319;ncRNA_intra_chr8_7321;ncRNA_intra_chr8_7322;ncRNA_intra_chr8_7323;ncRNA_intra_chr8_7324;ncRNA_intra_chr8_7327],[Longest ORF:24 aa]	chr8:95,600,203-95,676,870					lncRNA	0.474473	-2.1076	43.0205	20.8117	1.65352e-07	Female	class_I	IB
nc_intra_c8_7310	[TAD1713_chr8],[Minus],[Exon count:2],[Isoform count1],[Overlapping Protein-coding:Ces1c;Ces1b, LncRNA:ncRNA_intra_chr8_7308;ncRNA_intra_chr8_7312;ncRNA_intra_chr8_7313;ncRNA_intra_chr8_7314;ncRNA_intra_chr8_7317;ncRNA_intra_chr8_7319;ncRNA_intra_chr8_7321;ncRNA_intra_chr8_7322;ncRNA_intra_chr8_7323;ncRNA_intra_chr8_7324;ncRNA_intra_chr8_7327],[Longest ORF:34 aa]	chr8:95,600,770-95,652,458					lncRNA	0.477027	-2.09632	41.8313	20.3555	2.21658e-05	Female	class_I	IA
NCMAP	[TAD944_chr4],[Minus],[Overlapping_Isoform_Count: 6]	chr4:134,925,491-134,954,142 chr4:134,925,491-134,941,587	NM_145555 NM_001168500 NM_001243306 NM_001243305 NM_181047 NM_001168498			Ncmap	RefSeq	0.335504	-2.98059	1.01267	0.331133	4.44652e-11	Female	class_I	IA
NDRG1	[TAD2949_chr15],[Minus]	chr15:66,760,879-66,801,203	NM_008681	N-myc downstream regulated gene 1, protein NDRG1	nucleus (GO:0005634); cytoplasm (GO:0005737); mast cell activation (GO:0045576)	Ndrg1	RefSeq	0.616361	-1.62243	6.10839	3.64258	2.15614e-05	Female	no_response	none
NEAT1	[TAD3409_chr19],[Minus]	chr19:5,842,301-5,845,478	NR_003513	nuclear paraspeckle assembly transcript 1 (non-protein coding),	protein binding (GO:0005515); paraspeckles (GO:0042382); cellular component maintenance (GO:0043954)	Neat1	RefSeq	0.609915	-1.63957	86.4293	50.7818	7.86405e-10	Female	class_II	IIA
NFKB2	[TAD3492_chr19],[Plus],[Overlapping_Isoform_Count: 3]	chr19:46,380,184-46,386,580 chr19:46,380,419-46,386,580 chr19:46,379,226-46,386,580	NM_019408 NM_001177369 NM_001177370	Nuclear factor of kappa light polypeptide gene enhancer in B-cells 2, p49/p100, nuclear factor NF-kappa-B p100 subunit isoform a;nuclear factor NF-kappa-B p100 subunit isoform b	follicular dendritic cell differentiation (GO:0002268); germinal center formation (GO:0002467); DNA binding (GO:0003677); DNA binding transcription factor activity (GO:0003700); transcription coactivator activity (GO:0003713); protein binding (GO:0005515); nucleus (GO:0005634); cytoplasm (GO:0005737); cytosol (GO:0005829); regulation of transcription, DNA-templated (GO:0006355); signal transducti…	Nfkb2	RefSeq	0.617015	-1.62071	1.63394	0.969321	0.0431012	Female	class_II	IIA
NGFR	[TAD2325_chr11],[Minus]	chr11:95,430,139-95,449,012	NM_033217	Nerve growth factor receptor (TNFR superfamily, member 16), tumor necrosis factor receptor superfamily member 16 precursor	catalytic activity (GO:0003824); neurotrophin receptor activity (GO:0005030); death receptor activity (GO:0005035); protein binding (GO:0005515); extracellular space (GO:0005615); nucleus (GO:0005634); cytoplasm (GO:0005737); plasma membrane (GO:0005886); lipid metabolic process (GO:0006629); apoptotic process (GO:0006915); signal transduction (GO:0007165); multicellular organism development (GO:…	Ngfr	RefSeq	0.605113	-1.65258	1.37018	0.789272	0.000145893	Female	class_II	IIA
NIPAL1	[TAD1045_chr5],[Plus]	chr5:73,039,034-73,062,317	NM_001081205	NIPA-like domain containing 1, magnesium transporter NIPA3	molecular_function (GO:0003674); cellular_component (GO:0005575); transport (GO:0006810); ion transport (GO:0006811); magnesium ion transport (GO:0015693); membrane (GO:0016020); integral component of membrane (GO:0016021)	Nipal1	RefSeq	0.20586	-4.85766	3.00751	0.593523	4.51751e-59	Female	class_I	IA
NLRP3	[TAD2244_chr11],[Plus]	chr11:59,356,187-59,380,458	NM_145827	NLR family, pyrin domain containing 3, NACHT, LRR and PYD domains-containing protein 3	nucleotide binding (GO:0000166); protein binding (GO:0005515); ATP binding (GO:0005524); cytoplasm (GO:0005737); apoptotic process (GO:0006915); activation of cysteine-type endopeptidase activity involved in apoptotic process (GO:0006919); interleukin-18 production (GO:0032621); interleukin-1 secretion (GO:0050701); defense response to virus (GO:0051607)	Nlrp3	RefSeq	0.438565	-2.28016	0.268461	0.113709	0.0136588	Female	class_II	IIA
NNMT	[TAD1828_chr9],[Minus]	chr9:48,399,994-48,413,182	NM_010924	Nicotinamide N-methyltransferase, nicotinamide N-methyltransferase isoform 2;nicotinamide N-methyltransferase isoform 1	obsolete soluble fraction (GO:0005625); cytoplasm (GO:0005737); nicotinamide N-methyltransferase activity (GO:0008112); methyltransferase activity (GO:0008168); transferase activity (GO:0016740)	Nnmt	RefSeq	0.41928	-2.38504	13.5439	5.45498	8.82221e-10	Female	class_II	IIB
NPAS2	[TAD35_chr1],[Plus]	chr1:39,251,116-39,420,085	NM_008719	Neuronal PAS domain protein 2, neuronal PAS domain-containing protein 2	DNA binding (GO:0003677); DNA binding transcription factor activity (GO:0003700); signal transducer activity (GO:0004871); nucleus (GO:0005634); transcription factor complex (GO:0005667); regulation of transcription, DNA-templated (GO:0006355); signal transduction (GO:0007165); obsolete transcription regulator activity (GO:0030528); circadian sleep/wake cycle (GO:0042745); locomotor rhythm (GO:00…	Npas2	RefSeq	0.653118	-1.53112	0.984547	0.623985	0.0345129	Female	class_I	IB
NQO1	[TAD1729_chr8],[Minus]	chr8:109,912,124-109,927,105	NM_008706	NAD(P)H dehydrogenase, quinone 1, NAD(P)H dehydrogenase [quinone] 1	NAD(P)H dehydrogenase (quinone) activity (GO:0003955); cytoplasm (GO:0005737); obsolete electron transport (GO:0006118); response to oxidative stress (GO:0006979); electron transfer activity (GO:0009055); oxidoreductase activity (GO:0016491); negative regulation of catalytic activity (GO:0043086); positive regulation of neuron apoptotic process (GO:0043525); coenzyme binding (GO:0050662); oxidati…	Nqo1	RefSeq	0.436275	-2.29213	3.26921	1.36445	7.1512e-12	Female	class_II	IIA
NR4A1	[TAD3001_chr15],[Plus]	chr15:101,097,276-101,105,225	NM_010444	Nuclear receptor subfamily 4, group A, member 1, nuclear receptor subfamily 4 group A member 1	DNA binding (GO:0003677); DNA binding transcription factor activity (GO:0003700); steroid hormone receptor activity (GO:0003707); nuclear receptor activity (GO:0004879); protein binding (GO:0005515); nucleus (GO:0005634); regulation of transcription, DNA-templated (GO:0006355); signal transduction (GO:0007165); zinc ion binding (GO:0008270); obsolete transcription activator activity (GO:0016563);…	Nr4a1	RefSeq	0.511901	-1.9535	0.347959	0.171961	0.0205688	Female	class_II	IIB
NRP2	[TAD70_chr1],[Plus],[Overlapping_Isoform_Count: 6]	chr1:62,749,890-62,843,665 chr1:62,749,890-62,865,266	NM_001077403 NM_001077406 NM_001077407 NM_001077404 NM_010939 NM_001077405	Neuropilin 2, neuropilin-2 isoform 4 precursor;neuropilin-2 isoform 5 precursor;neuropilin-2 isoform 2 precursor;neuropilin-2 isoform 1 precursor;neuropilin-2 isoform 6 precursor;neuropilin-2 isoform 3 precursor	neural crest cell migration (GO:0001755); protein binding (GO:0005515); extracellular space (GO:0005615); plasma membrane (GO:0005886); cell adhesion (GO:0007155); signal transduction (GO:0007165); multicellular organism development (GO:0007275); nervous system development (GO:0007399); heart development (GO:0007507); membrane (GO:0016020); integral component of membrane (GO:0016021); semaphorin …	Nrp2	RefSeq	0.634261	-1.57664	1.61269	0.985174	3.16231e-07	Female	class_II	IIA
NT5E	[TAD1911_chr9],[Plus]	chr9:88,222,446-88,266,927	NM_011851	5' nucleotidase, ecto, 5'-nucleotidase precursor	nucleotide binding (GO:0000166); extracellular space (GO:0005615); obsolete membrane fraction (GO:0005624); plasma membrane (GO:0005886); purine nucleotide biosynthetic process (GO:0006164); AMP catabolic process (GO:0006196); ferrous iron binding (GO:0008198); 5'-nucleotidase activity (GO:0008253); nucleotide catabolic process (GO:0009166); membrane (GO:0016020); integral component of membrane (…	Nt5e	RefSeq	0.256362	-3.90073	22.7987	5.64365	2.25015e-73	Female	class_I	IB
NTRK2	[TAD2630_chr13],[Plus],[Overlapping_Isoform_Count: 3]	chr13:58,907,929-59,038,392 chr13:58,907,929-59,235,331 chr13:58,909,057-59,235,331	NM_001025074 NM_008745 NM_001282961	Neurotrophic tyrosine kinase, receptor, type 2, BDNF/NT-3 growth factors receptor isoform b precursor;BDNF/NT-3 growth factors receptor isoform a precursor	nucleotide binding (GO:0000166); vasculogenesis (GO:0001570); protein kinase activity (GO:0004672); protein tyrosine kinase activity (GO:0004713); transmembrane receptor protein tyrosine kinase activity (GO:0004714); neurotrophin receptor activity (GO:0005030); protein binding (GO:0005515); ATP binding (GO:0005524); cytosol (GO:0005829); plasma membrane (GO:0005886); integral component of plasma …	Ntrk2	RefSeq	0.0426492	-23.4471	0.555526	0.0218335	2.16212e-65	Female	class_I	IC
OASL2	[TAD1101_chr5],[Plus]	chr5:115,346,942-115,362,254	NM_011854	2'-5' oligoadenylate synthetase-like 2, 2'-5'-oligoadenylate synthase-like protein 2	nucleotide binding (GO:0000166); 2'-5'-oligoadenylate synthetase activity (GO:0001730); nucleic acid binding (GO:0003676); RNA binding (GO:0003723); ATP binding (GO:0005524); cellular_component (GO:0005575); cellular protein modification process (GO:0006464); immune response (GO:0006955); biological_process (GO:0008150); transferase activity (GO:0016740); nucleotidyltransferase activity (GO:00167…	Oasl2	RefSeq	0.581999	-1.71822	0.791174	0.438899	0.00674149	Female	class_I	IA
OAT	[TAD1584_chr7],[Minus]	chr7:139,749,157-139,768,081	NM_016978	Ornithine aminotransferase, ornithine aminotransferase, mitochondrial precursor	catalytic activity (GO:0003824); ornithine-oxo-acid transaminase activity (GO:0004587); cytoplasm (GO:0005737); mitochondrion (GO:0005739); transaminase activity (GO:0008483); transferase activity (GO:0016740); pyridoxal phosphate binding (GO:0030170)	Oat	RefSeq	0.454365	-2.20087	116.184	50.8916	4.64475e-33	Female	class_II	IIB
ORM3	[TAD834_chr4],[Plus]	chr4:63,017,195-63,020,545	NM_013623	Orosomucoid 3, alpha-1-acid glycoprotein 3 precursor	regulation of immune system process (GO:0002682); binding (GO:0005488); extracellular region (GO:0005576); extracellular space (GO:0005615); acute-phase response (GO:0006953)	Orm3	RefSeq	0.212559	-4.70457	16.9759	3.45511	2.84859e-14	Female	class_II	IIA
P2RY4	[TAD3560_chrX],[Minus]	chrX:97,785,492-97,790,208	NM_020621	Pyrimidinergic receptor P2Y, G-protein coupled, 4, P2Y purinoceptor 4	obsolete rhodopsin-like receptor activity (GO:0001584); signal transducer activity (GO:0004871); G-protein coupled receptor activity (GO:0004930); ATP binding (GO:0005524); plasma membrane (GO:0005886); signal transduction (GO:0007165); G-protein coupled receptor signaling pathway (GO:0007186); membrane (GO:0016020); integral component of membrane (GO:0016021); basolateral plasma membrane (GO:001…	P2ry4	RefSeq	0.633291	-1.57905	2.11934	1.29404	2.67025e-05	Female	no_response	none
PAPSS2	[TAD3464_chr19],[Plus],[Overlapping_Isoform_Count: 2]	chr19:32,694,494-32,741,677 chr19:32,670,204-32,741,677	NM_011864 NM_001201470	3'-phosphoadenosine 5'-phosphosulfate synthase 2, bifunctional 3'-phosphoadenosine 5'-phosphosulfate synthase 2 isoform 2;bifunctional 3'-phosphoadenosine 5'-phosphosulfate synthase 2 isoform 1	sulfate assimilation (GO:0000103); nucleotide binding (GO:0000166); catalytic activity (GO:0003824); adenylylsulfate kinase activity (GO:0004020); sulfate adenylyltransferase (ATP) activity (GO:0004781); ATP binding (GO:0005524); blood coagulation (GO:0007596); kinase activity (GO:0016301); phosphorylation (GO:0016310); transferase activity (GO:0016740); transferase activity, transferring phospho…	Papss2	RefSeq	0.381249	-2.62296	50.0515	18.3831	5.03806e-36	Female	no_response	none
PARP11	[TAD1361_chr6],[Plus]	chr6:127,403,740-127,444,257	NM_181402	Poly (ADP-ribose) polymerase family, member 11, poly [ADP-ribose] polymerase 11	molecular_function (GO:0003674); NAD+ ADP-ribosyltransferase activity (GO:0003950); cellular_component (GO:0005575); biological_process (GO:0008150); transferase activity (GO:0016740); transferase activity, transferring glycosyl groups (GO:0016757)	Parp11	RefSeq	0.62516	-1.59959	1.02006	0.618153	0.00223185	Female	no_response	none
PBX1	[TAD214_chr1],[Minus],[Overlapping_Isoform_Count: 4]	chr1:170,049,494-170,362,300 chr1:170,083,657-170,362,300	NM_008783 NM_183355 NM_001291508 NM_001291509	Pre B-cell leukemia transcription factor 1, pre-B-cell leukemia transcription factor 1 isoform b;pre-B-cell leukemia transcription factor 1 isoform a;pre-B-cell leukemia transcription factor 1 isoform d	urogenital system development (GO:0001655); branching involved in ureteric bud morphogenesis (GO:0001658); DNA binding (GO:0003677); DNA binding transcription factor activity (GO:0003700); protein binding (GO:0005515); nucleus (GO:0005634); transcription factor complex (GO:0005667); cytoplasm (GO:0005737); regulation of transcription, DNA-templated (GO:0006355); steroid biosynthetic process (GO:0…	Pbx1	RefSeq	0.630193	-1.58682	0.94179	0.572277	5.63483e-06	Female	no_response	none
PCED1B	[TAD2995_chr15],[Plus]	chr15:97,077,537-97,216,122	NM_172293			Pced1b	RefSeq	0.567026	-1.76359	0.937547	0.516759	0.00136784	Female	no_response	none
PCP4L1	[TAD220_chr1],[Minus]	chr1:173,103,394-173,126,399	NM_025557	Purkinje cell protein 4-like 1, Purkinje cell protein 4-like protein 1	molecular_function (GO:0003674); cellular_component (GO:0005575); biological_process (GO:0008150)	Pcp4l1	RefSeq	0.334152	-2.99265	13.0001	4.15177	4.21782e-24	Female	class_II	IIB
PCSK5	[TAD3434_chr19],[Minus],[Overlapping_Isoform_Count: 2]	chr19:17,507,321-17,912,122 chr19:17,632,648-17,912,122	NM_001163144 NM_001190483	Proprotein convertase subtilisin/kexin type 5, proprotein convertase subtilisin/kexin type 5 isoform 1 preproprotein;proprotein convertase subtilisin/kexin type 5 isoform 2 preproprotein	kidney development (GO:0001822); endopeptidase activity (GO:0004175); serine-type endopeptidase activity (GO:0004252); obsolete subtilase activity (GO:0004289); transmembrane receptor protein tyrosine kinase activity (GO:0004714); ATP binding (GO:0005524); extracellular region (GO:0005576); extracellular space (GO:0005615); Golgi apparatus (GO:0005794); protein phosphorylation (GO:0006468); prote…	Pcsk5	RefSeq	0.638704	-1.56567	1.00878	0.618963	5.55504e-06	Female	class_II	IIA
PDE1A	[TAD385_chr2],[Minus],[Overlapping_Isoform_Count: 4]	chr2:79,674,609-79,969,128 chr2:79,674,609-79,969,569 chr2:79,699,181-79,748,556	NM_016744 NM_001009978 NM_001159582 NM_001009979	Phosphodiesterase 1A, calmodulin-dependent, calcium/calmodulin-dependent 3',5'-cyclic nucleotide phosphodiesterase 1A isoform PDE1A9;calcium/calmodulin-dependent 3',5'-cyclic nucleotide phosphodiesterase 1A isoform PDE1A2;calcium/calmodulin-dependent 3',5'-cyclic nucleotide phosphodiesterase 1A isoform PDE1A7	catalytic activity (GO:0003824); 3',5'-cyclic-nucleotide phosphodiesterase activity (GO:0004114); 3',5'-cyclic-AMP phosphodiesterase activity (GO:0004115); calmodulin-dependent cyclic-nucleotide phosphodiesterase activity (GO:0004117); calmodulin binding (GO:0005516); nucleus (GO:0005634); cytoplasm (GO:0005737); cAMP catabolic process (GO:0006198); signal transduction (GO:0007165); hydrolase act…	Pde1a	RefSeq	0.577017	-1.73305	0.475599	0.267939	0.00304908	Female	class_II	IIB
PDE4D	[TAD2700_chr13],[Plus],[Overlaps with:Mir1904;Mir582]	chr13:109,444,370-110,746,177	NM_011056	Phosphodiesterase 4D, cAMP specific, cAMP-specific 3',5'-cyclic phosphodiesterase 4D	obsolete cell fraction (GO:0000267); catalytic activity (GO:0003824); cyclic-nucleotide phosphodiesterase activity (GO:0004112); 3',5'-cyclic-nucleotide phosphodiesterase activity (GO:0004114); 3',5'-cyclic-AMP phosphodiesterase activity (GO:0004115); cytoplasm (GO:0005737); cytoskeleton (GO:0005856); plasma membrane (GO:0005886); cAMP catabolic process (GO:0006198); smooth muscle contraction (GO…	Pde4d	RefSeq	0.660715	-1.51351	0.509259	0.323222	0.00651611	Female	class_II	IIB
PDK4	[TAD1172_chr6],[Minus]	chr6:5,433,350-5,446,278	NM_013743	Pyruvate dehydrogenase kinase, isoenzyme 4, [Pyruvate dehydrogenase (acetyl-transferring)] kinase isozyme 4, mitochondrial	phosphorelay sensor kinase activity (GO:0000155); nucleotide binding (GO:0000166); protein histidine kinase activity (GO:0004673); protein serine/threonine/tyrosine kinase activity (GO:0004712); pyruvate dehydrogenase (acetyl-transferring) kinase activity (GO:0004740); ATP binding (GO:0005524); mitochondrion (GO:0005739); mitochondrial inner membrane (GO:0005743); carbohydrate metabolic process (…	Pdk4	RefSeq	0.652628	-1.53227	1.99957	1.24812	0.025629	Female	no_response	none
PGM5	[TAD3448_chr19],[Minus]	chr19:24,752,750-24,936,332	NM_175013	Phosphoglucomutase 5, phosphoglucomutase-like protein 5	magnesium ion binding (GO:0000287); cell morphogenesis (GO:0000902); obsolete trypsin activity (GO:0004295); phosphoglucomutase activity (GO:0004614); structural molecule activity (GO:0005198); protein binding (GO:0005515); cytoplasm (GO:0005737); cytoskeleton (GO:0005856); cell-cell adherens junction (GO:0005913); carbohydrate metabolic process (GO:0005975); glucose metabolic process (GO:0006006…	Pgm5	RefSeq	0.566069	-1.76657	0.309577	0.167363	0.00105877	Female	no_response	none
PIK3R5	[TAD2266_chr11],[Plus]	chr11:68,245,626-68,311,348	NM_177320	Phosphoinositide-3-kinase, regulatory subunit 5, p101, phosphoinositide 3-kinase regulatory subunit 5	nucleus (GO:0005634); cytoplasm (GO:0005737); membrane (GO:0016020); kinase activity (GO:0016301); phosphorylation (GO:0016310)	Pik3r5	RefSeq	0.350035	-2.85686	0.293225	0.0971527	0.0334725	Female	class_II	IIA
PIRA1	[TAD1402_chr7],[Minus],[Overlaps with:Gm14548;Lilra6;Pira11;Pira2;Pira4;Pira6;Pira7],[Multi-counted reads: Whole_gene_body, Exon-only_counting, -]	chr7:3,788,416-3,867,086	NM_011087	Paired-Ig-like receptor A1, paired-Ig-like receptor A1 precursor		Pira1	RefSeq	0.660736	-1.51346	1.29988	0.822792	0.0116923	Female	no_response	none
PIRA2	[TAD1402_chr7],[Minus],[Overlaps with:Pira1;Pira11;Pira4;Pira6;Pira7],[Multi-counted reads: -, -, Intron-only_counting]	chr7:3,788,411-3,796,653	NM_011089	paired-Ig-like receptor A2, paired-Ig-like receptor A2 precursor	molecular_function (GO:0003674); cellular_component (GO:0005575); biological_process (GO:0008150)	Pira2	RefSeq	0.615923	-1.62358	1.24194	0.732325	0.00214346	Female	no_response	none
PIRA4	[TAD1402_chr7],[Minus],[Overlaps with:Gm14548;Pira1;Pira11;Pira2;Pira6;Pira7],[Multi-counted reads: Whole_gene_body, Exon-only_counting, Intron-only_counting]	chr7:3,789,728-3,849,694	NM_011091			Pira4	RefSeq	0.584902	-1.70969	0.777048	0.43706	0.0305661	Female	no_response	none
PIRA7	[TAD1402_chr7],[Minus],[Overlaps with:Gm14548;Pira1;Pira11;Pira2;Pira4;Pira6],[Multi-counted reads: Whole_gene_body, Exon-only_counting, Intron-only_counting]	chr7:3,789,723-3,849,722	NM_011094	paired-Ig-like receptor A7, paired-Ig-like receptor A7 precursor	molecular_function (GO:0003674); cellular_component (GO:0005575); biological_process (GO:0008150)	Pira7	RefSeq	0.581082	-1.72093	0.770618	0.430383	0.0300254	Female	no_response	none
PLA1A	[TAD3074_chr16],[Minus]	chr16:38,396,202-38,433,225	NM_134102	Phospholipase A1 member A, phospholipase A1 member A precursor	molecular_function (GO:0003674); catalytic activity (GO:0003824); cellular_component (GO:0005575); extracellular region (GO:0005576); extracellular space (GO:0005615); lipid metabolic process (GO:0006629); biological_process (GO:0008150); lipid catabolic process (GO:0016042); hydrolase activity (GO:0016787)	Pla1a	RefSeq	0.634749	-1.57543	9.89603	6.07065	2.40684e-08	Female	no_response	none
PLA2G4B	[TAD439_chr2],[Plus],[Overlaps with:Gm28042],[Multi-counted reads: Whole_gene_body, Exon-only_counting, Intron-only_counting]	chr2:119,859,168-119,868,768	NM_145378	Phospholipase A2, group IVB (cytosolic), cytosolic phospholipase A2 beta	phospholipase activity (GO:0004620); phospholipase A2 activity (GO:0004623); cytoplasm (GO:0005737); metabolic process (GO:0008152); phospholipid catabolic process (GO:0009395); membrane (GO:0016020); lipid catabolic process (GO:0016042); hydrolase activity (GO:0016787); cytoplasmic vesicle (GO:0031410)	Pla2g4b	RefSeq	0.47099	-2.12319	0.333295	0.149482	0.00361936	Female	no_response	none
PLEK	[TAD2182_chr11],[Minus]	chr11:16,871,208-16,908,721	NM_019549	Pleckstrin, pleckstrin	calcium ion binding (GO:0005509); vesicle docking involved in exocytosis (GO:0006904); positive regulation of platelet activation (GO:0010572); positive regulation of actin filament depolymerization (GO:0030836); positive regulation of integrin activation (GO:0033625); thrombin-activated receptor signaling pathway (GO:0070493); platelet aggregation (GO:0070527); protein kinase C signaling (GO:007…	Plek	RefSeq	0.433487	-2.30687	1.10425	0.458705	0.00578018	Female	class_II	IIA
PLGRKT	[TAD3458_chr19],[Minus]	chr19:29,423,166-29,436,361	NM_026362			Plgrkt	RefSeq	0.578898	-1.72742	4.1994	2.34614	0.000232644	Female	no_response	none
PLSCR2	[TAD1916_chr9],[Plus],[Overlapping_Isoform_Count: 2]	chr9:92,170,439-92,192,590	NM_008880 NM_001195084	Phospholipid scramblase 2, phospholipid scramblase 2	calcium ion binding (GO:0005509); protein binding (GO:0005515); membrane (GO:0016020); integral component of membrane (GO:0016021); SH3 domain binding (GO:0017124)	Plscr2	RefSeq	0.645725	-1.54865	6.95032	4.31985	5.35443e-05	Female	no_response	none
PNPLA3	[TAD2977_chr15],[Plus],[Overlaps with:Mir6392]	chr15:83,998,245-84,019,951	NM_054088	Patatin-like phospholipase domain containing 3, patatin-like phospholipase domain-containing protein 3	molecular_function (GO:0003674); catalytic activity (GO:0003824); triglyceride lipase activity (GO:0004806); lipid metabolic process (GO:0006629); biological_process (GO:0008150); metabolic process (GO:0008152); membrane (GO:0016020); integral component of membrane (GO:0016021); lipid catabolic process (GO:0016042); transferase activity (GO:0016740); hydrolase activity (GO:0016787)	Pnpla3	RefSeq	0.219116	-4.5638	3.47678	0.727913	8.73822e-14	Female	class_I	IA
POLA1	[TAD3553_chrX],[Minus]	chrX:90,550,104-90,877,494	NM_008892	Polymerase (DNA directed), alpha 1, DNA polymerase alpha catalytic subunit	nucleotide binding (GO:0000166); nucleoside binding (GO:0001882); nucleic acid binding (GO:0003676); DNA binding (GO:0003677); DNA-directed DNA polymerase activity (GO:0003887); protein binding (GO:0005515); nucleus (GO:0005634); alpha DNA polymerase:primase complex (GO:0005658); nucleobase-containing compound metabolic process (GO:0006139); DNA replication (GO:0006260); 3'-5' exonuclease activit…	Pola1	RefSeq	0.623922	-1.60276	0.606867	0.359758	0.000838462	Female	no_response	none
PPL	[TAD3011_chr16],[Minus]	chr16:5,086,383-5,132,574	NM_008909	Periplakin, periplakin	structural molecule activity (GO:0005198); nucleus (GO:0005634); cytoplasm (GO:0005737); mitochondrion (GO:0005739); cytoskeleton (GO:0005856); plasma membrane (GO:0005886); membrane (GO:0016020); extrinsic component of plasma membrane (GO:0019897); cell junction (GO:0030054); keratinization (GO:0031424)	Ppl	RefSeq	0.661981	-1.51062	1.59494	1.0119	0.000453531	Female	class_II	IIA
PREX1	[TAD518_chr2],[Minus]	chr2:166,391,844-166,539,332	NM_177782	Phosphatidylinositol-3,4,5-trisphosphate-dependent Rac exchange factor 1, phosphatidylinositol 3,4,5-trisphosphate-dependent Rac exchanger 1 protein	guanyl-nucleotide exchange factor activity (GO:0005085); Rho guanyl-nucleotide exchange factor activity (GO:0005089); protein binding (GO:0005515); intracellular (GO:0005622); cytoplasm (GO:0005737); plasma membrane (GO:0005886); membrane (GO:0016020); growth cone (GO:0030426); regulation of actin filament polymerization (GO:0030833); regulation of Rho protein signal transduction (GO:0035023); de…	Prex1	RefSeq	0.544602	-1.8362	0.940843	0.492901	1.08985e-06	Female	no_response	none
PRLR	[TAD2877.1_chr15],[Plus],[Overlapping_Isoform_Count: 3]	chr15:10,106,992-10,266,775 chr15:10,223,405-10,275,537 chr15:10,153,660-10,278,935	NM_011169 NM_001253781 NM_001253782	Prolactin receptor, prolactin receptor isoform 1 precursor;prolactin receptor isoform 3 precursor;prolactin receptor isoform 2 precursor	cytokine receptor activity (GO:0004896); prolactin receptor activity (GO:0004925); JAK-STAT cascade (GO:0007259); lactation (GO:0007595); membrane (GO:0016020); integral component of membrane (GO:0016021); cytokine-mediated signaling pathway (GO:0019221); protein kinase binding (GO:0019901); regulation of cell adhesion (GO:0030155); regulation of epithelial cell differentiation (GO:0030856); meta…	Prlr	RefSeq	0.300782	-3.32467	20.2483	5.87126	7.56524e-86	Female	class_I	IA
PROM1	[TAD1016_chr5],[Minus],[Overlapping_Isoform_Count: 8]	chr5:44,384,860-44,486,007 chr5:44,392,681-44,486,007 chr5:44,384,860-44,492,975	NM_001163577 NM_008935 NM_001163585 NM_001163584 NM_001163578 NM_001163582 NM_001163581 NM_001163583	Prominin 1, prominin-1 isoform s2 precursor;prominin-1 isoform s8 precursor;prominin-1 isoform s3 precursor;prominin-1 isoform s4 precursor;prominin-1 isoform s1 precursor;prominin-1 isoform s5 precursor;prominin-1 isoform s7 precursor;prominin-1 isoform s6 precursor	molecular_function (GO:0003674); extracellular space (GO:0005615); plasma membrane (GO:0005886); integral component of plasma membrane (GO:0005887); microvillus (GO:0005902); brush border (GO:0005903); phototransduction (GO:0007602); biological_process (GO:0008150); cell surface (GO:0009986); membrane (GO:0016020); integral component of membrane (GO:0016021); apical plasma membrane (GO:0016324); …	Prom1	RefSeq	0.0404304	-24.7339	2.55092	0.100536	2.78531e-134	Female	class_I	IA
PROM2	[TAD447_chr2],[Minus],[Overlapping_Isoform_Count: 2]	chr2:127,352,688-127,367,153	NM_138750 NM_178047	Prominin 2, prominin-2 isoform 1 precursor;prominin-2 isoform 2 precursor	molecular_function (GO:0003674); extracellular space (GO:0005615); plasma membrane (GO:0005886); cilium (GO:0005929); obsolete electron transport (GO:0006118); biological_process (GO:0008150); electron transfer activity (GO:0009055); membrane (GO:0016020); integral component of membrane (GO:0016021); cell projection (GO:0042995)	Prom2	RefSeq	0.147052	-6.80032	1.66716	0.236913	1.24697e-41	Female	no_response	none
PSD	[TAD3492_chr19],[Minus]	chr19:46,386,576-46,401,646	NM_028627	Pleckstrin and Sec7 domain containing, PH and SEC7 domain-containing protein 1	guanyl-nucleotide exchange factor activity (GO:0005085); ARF guanyl-nucleotide exchange factor activity (GO:0005086); intracellular (GO:0005622); integral component of membrane (GO:0016021); regulation of ARF protein signal transduction (GO:0032012); regulation of catalytic activity (GO:0050790)	Psd	RefSeq	0.455284	-2.19643	0.254456	0.110441	0.0077025	Female	no_response	none
PSMB8	[TAD3193_chr17],[Plus]	chr17:34,335,139-34,338,399	NM_010724	Proteasome (prosome, macropain) subunit, beta type 8 (large multifunctional peptidase 7), proteasome subunit beta type-8 precursor	proteasome complex (GO:0000502); endopeptidase activity (GO:0004175); threonine-type endopeptidase activity (GO:0004298); nucleus (GO:0005634); cytoplasm (GO:0005737); cytosol (GO:0005829); proteasome core complex (GO:0005839); ubiquitin-dependent protein catabolic process (GO:0006511); immune response (GO:0006955); peptidase activity (GO:0008233); hydrolase activity (GO:0016787); antigen process…	Psmb8	RefSeq	0.6617	-1.51126	18.0679	11.5151	0.00293632	Female	no_response	none
PSMB9	[TAD3193_chr17],[Minus]	chr17:34,319,043-34,324,275	NM_013585	Proteasome (prosome, macropain) subunit, beta type 9 (large multifunctional peptidase 2), proteasome subunit beta type-9	proteasome complex (GO:0000502); endopeptidase activity (GO:0004175); threonine-type endopeptidase activity (GO:0004298); nucleus (GO:0005634); cytoplasm (GO:0005737); cytosol (GO:0005829); proteasome core complex (GO:0005839); ubiquitin-dependent protein catabolic process (GO:0006511); immune response (GO:0006955); peptidase activity (GO:0008233); hydrolase activity (GO:0016787); antigen process…	Psmb9	RefSeq	0.613458	-1.6301	14.8065	8.76288	0.0202998	Female	no_response	none
PTGDS	[TAD302_chr2],[Minus]	chr2:25,322,231-25,325,269	NM_008963	Prostaglandin D2 synthase (brain), prostaglandin-H2 D-isomerase precursor	prostaglandin biosynthetic process (GO:0001516); prostaglandin-D synthase activity (GO:0004667); transporter activity (GO:0005215); binding (GO:0005488); retinoid binding (GO:0005501); extracellular region (GO:0005576); extracellular space (GO:0005615); nucleus (GO:0005634); cytoplasm (GO:0005737); endoplasmic reticulum (GO:0005783); Golgi apparatus (GO:0005794); lipid metabolic process (GO:00066…	Ptgds	RefSeq	0.414296	-2.41373	10.1065	4.03426	8.76574e-11	Female	class_I	IB
PTPDC1	[TAD2607_chr13],[Minus],[Overlapping_Isoform_Count: 2]	chr13:48,673,237-48,721,041	NM_207232 NM_001301781	Protein tyrosine phosphatase domain containing 1, protein tyrosine phosphatase domain-containing protein 1 isoform 1;protein tyrosine phosphatase domain-containing protein 1 isoform 2	molecular_function (GO:0003674); phosphoprotein phosphatase activity (GO:0004721); protein tyrosine phosphatase activity (GO:0004725); cellular_component (GO:0005575); protein dephosphorylation (GO:0006470); protein tyrosine/serine/threonine phosphatase activity (GO:0008138); biological_process (GO:0008150); dephosphorylation (GO:0016311); hydrolase activity (GO:0016787); phosphatase activity (GO…	Ptpdc1	RefSeq	0.535304	-1.8681	0.46762	0.24293	0.000143205	Female	no_response	none
PTPRC	[TAD165_chr1],[Minus],[Overlapping_Isoform_Count: 3]	chr1:139,959,435-140,071,882 chr1:139,959,435-140,071,703	NM_011210 NM_001111316 NM_001268286	Protein tyrosine phosphatase, receptor type, C, receptor-type tyrosine-protein phosphatase C precursor;receptor-type tyrosine-protein phosphatase C isoform 2 precursor;receptor-type tyrosine-protein phosphatase C isoform 1 precursor	activation of MAPK activity (GO:0000187); negative regulation of T cell mediated cytotoxicity (GO:0001915); positive regulation of T cell mediated cytotoxicity (GO:0001916); negative regulation of cytokine-mediated signaling pathway (GO:0001960); positive regulation of T cell mediated immunity (GO:0002711); regulation of humoral immune response mediated by circulating immunoglobulin (GO:0002923);…	Ptprc	RefSeq	0.646244	-1.5474	1.67051	1.03433	0.00986958	Female	no_response	none
PYGO1	[TAD1888_chr9],[Plus]	chr9:72,773,456-72,793,822	NM_028116	Pygopus 1, pygopus homolog 1	kidney development (GO:0001822); DNA binding (GO:0003677); DNA binding transcription factor activity (GO:0003700); protein binding (GO:0005515); nucleus (GO:0005634); regulation of transcription, DNA-templated (GO:0006355); zinc ion binding (GO:0008270); post-embryonic development (GO:0009791); Wnt signaling pathway (GO:0016055); metal ion binding (GO:0046872)	Pygo1	RefSeq	0.310813	-3.21737	0.463874	0.142468	2.51862e-05	Female	no_response	none
RAB27A	[TAD1888_chr9],[Plus],[Overlapping_Isoform_Count: 3]	chr9:72,911,954-72,945,421 chr9:72,892,616-72,945,421	NM_023635 NM_001301230 NM_001301232	RAB27A, member RAS oncogene family, ras-related protein Rab-27A	nucleotide binding (GO:0000166); GTPase activity (GO:0003924); protein binding (GO:0005515); GTP binding (GO:0005525); intracellular (GO:0005622); lysosome (GO:0005764); endosome (GO:0005768); Golgi apparatus (GO:0005794); protein targeting (GO:0006605); exocytosis (GO:0006887); small GTPase mediated signal transduction (GO:0007264); blood coagulation (GO:0007596); protein transport (GO:0015031);…	Rab27a	RefSeq	0.566101	-1.76647	1.17577	0.635973	5.71676e-05	Female	class_II	IIA
RAB30	[TAD1509_chr7],[Plus]	chr7:99,890,223-99,985,627	NM_029494	RAB30, member RAS oncogene family, ras-related protein Rab-30	nucleotide binding (GO:0000166); molecular_function (GO:0003674); GTPase activity (GO:0003924); GTP binding (GO:0005525); cellular_component (GO:0005575); Golgi stack (GO:0005795); plasma membrane (GO:0005886); small GTPase mediated signal transduction (GO:0007264); biological_process (GO:0008150); protein transport (GO:0015031); membrane (GO:0016020)	Rab30	RefSeq	0.520964	-1.91952	3.03124	1.51779	1.4452e-06	Female	no_response	none
RAC2	[TAD2967_chr15],[Minus]	chr15:78,389,598-78,403,213	NM_009008	RAS-related C3 botulinum substrate 2, ras-related C3 botulinum toxin substrate 2 precursor	nucleotide binding (GO:0000166); GTPase activity (GO:0003924); GTP binding (GO:0005525); intracellular (GO:0005622); obsolete membrane fraction (GO:0005624); nuclear envelope (GO:0005635); cytoplasm (GO:0005737); obsolete GTP catabolic process (GO:0006184); chemotaxis (GO:0006935); small GTPase mediated signal transduction (GO:0007264); positive regulation of cell proliferation (GO:0008284); memb…	Rac2	RefSeq	0.570334	-1.75336	1.38837	0.758748	0.00229654	Female	class_II	IIA
RAET1C	[TAD1999_chr10],[Plus],[Overlaps with:C920009B18Rik;H60b;Raet1a;Raet1b;Raet1d;Raet1e],[Multi-counted reads: Whole_gene_body, Exon-only_counting, -]	chr10:21,893,707-22,093,945	NM_009018	retinoic acid early transcript gamma, retinoic acid early-inducible protein 1-gamma precursor		Raet1c	RefSeq	0.588756	-1.6985	3.42059	1.95647	0.00197888	Female	class_II	IIB
RAET1E	[TAD1999_chr10],[Plus],[Overlaps with:Raet1a;Raet1b;Raet1c],[Multi-counted reads: -, -, Intron-only_counting]	chr10:21,893,326-21,903,720	NM_198193	retinoic acid early transcript 1E, retinoic acid early-inducible protein 1-epsilon precursor		Raet1e	RefSeq	0.423145	-2.36326	2.28591	0.929888	1.54832e-05	Female	class_II	IIB
RBL1	[TAD503_chr2],[Minus],[Overlapping_Isoform_Count: 2]	chr2:156,971,629-157,030,270 chr2:157,000,731-157,030,270	NM_011249 NM_001139516	Retinoblastoma-like 1 (p107), retinoblastoma-like protein 1 isoform 1;retinoblastoma-like protein 1 isoform 2	negative regulation of transcription by RNA polymerase II (GO:0000122); DNA binding (GO:0003677); protein binding (GO:0005515); nucleus (GO:0005634); transcription factor complex (GO:0005667); regulation of transcription, DNA-templated (GO:0006355); cell cycle (GO:0007049); negative regulation of cell cycle (GO:0045786)	Rbl1	RefSeq	0.614561	-1.62718	0.549877	0.321997	0.00875341	Female	no_response	none
RCAN2	[TAD3205_chr17],[Plus],[Overlapping_Isoform_Count: 4]	chr17:43,938,799-44,176,465 chr17:44,090,139-44,176,465 chr17:44,089,947-44,176,465 chr17:43,940,951-44,176,465	NM_207649 NM_030598 NM_001286653 NM_001286654	Regulator of calcineurin 2, calcipressin-2 isoform 2;calcipressin-2 isoform 1	calcium-mediated signaling (GO:0019722)	Rcan2	RefSeq	0.396159	-2.52424	1.85127	0.70531	2.42069e-22	Female	class_II	IIA
RCAN3	[TAD945_chr4],[Minus],[Overlaps with:Mir700]	chr4:134,968,223-134,989,720	NM_022980	Regulator of calcineurin 3, calcipressin-3	calcium-mediated signaling (GO:0019722)	Rcan3	RefSeq	0.645095	-1.55016	0.531939	0.333494	0.0154761	Female	no_response	none
RDH16	[TAD2163_chr10],[Plus]	chr10:127,238,208-127,252,895	NM_009040	Retinol dehydrogenase 16, retinol dehydrogenase 16	retinol dehydrogenase activity (GO:0004745); extracellular space (GO:0005615); endoplasmic reticulum lumen (GO:0005788); obsolete microsome (GO:0005792); metabolic process (GO:0008152); oxidoreductase activity (GO:0016491); integral component of organelle membrane (GO:0031301); protein homodimerization activity (GO:0042803); 9-cis-retinoic acid biosynthetic process (GO:0042904); oxidation-reducti…	Rdh16	RefSeq	0.55033	-1.81709	15.1498	8.0427	7.93919e-07	Female	class_II	IIB
REN1	[TAD153_chr1],[Plus],[Overlaps with:Ren2],[Multi-counted reads: Whole_gene_body, Exon-only_counting, Intron-only_counting]	chr1:135,247,250-135,256,896	NM_031192	Renin 1 structural, renin-1 precursor	mesonephros development (GO:0001823); angiotensin maturation (GO:0002003); regulation of blood volume by renin-angiotensin (GO:0002016); endopeptidase activity (GO:0004175); aspartic-type endopeptidase activity (GO:0004190); insulin-like growth factor receptor binding (GO:0005159); extracellular space (GO:0005615); proteolysis (GO:0006508); response to stress (GO:0006950); establishment of blood-…	Ren1	RefSeq	0.379826	-2.63279	0.666493	0.235481	0.00012031	Female	class_II	IIB
REN2	[TAD153_chr1],[Plus],[Overlaps with:Ren1],[Multi-counted reads: Whole_gene_body, Exon-only_counting, Intron-only_counting]	chr1:135,247,142-135,256,900	NM_031193	Renin 2 tandem duplication of Ren1, renin-2	aspartic-type endopeptidase activity (GO:0004190); obsolete pepsin A activity (GO:0004194); obsolete renin activity (GO:0004195); proteolysis (GO:0006508); peptidase activity (GO:0008233); hormone-mediated signaling pathway (GO:0009755); hydrolase activity (GO:0016787)	Ren2	RefSeq	0.386645	-2.58635	0.626782	0.227269	0.000111565	Female	class_II	IIB
RFX4	[TAD2095_chr10],[Plus],[Overlapping_Isoform_Count: 2]	chr10:84,300,892-84,369,283 chr10:84,218,792-84,369,281	NM_027689 NM_001024918	Regulatory factor X, 4 (influences HLA class II expression), transcription factor RFX4 isoform 2;transcription factor RFX4 isoform 1	DNA binding (GO:0003677); chromatin binding (GO:0003682); obsolete RNA polymerase II transcription factor activity (GO:0003702); protein binding (GO:0005515); nucleus (GO:0005634); regulation of transcription, DNA-templated (GO:0006355); dorsal spinal cord development (GO:0021516); cerebellar cortex morphogenesis (GO:0021696); forebrain development (GO:0030900); midbrain development (GO:0030901);…	Rfx4	RefSeq	0.258327	-3.87106	0.794271	0.203505	1.26664e-15	Female	class_I	IB
RGN	[TAD3527_chrX],[Plus]	chrX:20,126,943-20,139,213	NM_009060	Regucalcin, regucalcin	calcium ion binding (GO:0005509); nucleus (GO:0005634); cytoplasm (GO:0005737); cellular calcium ion homeostasis (GO:0006874); enzyme regulator activity (GO:0030234); positive regulation of ATPase activity (GO:0032781); regulation of catalytic activity (GO:0050790); regulation of calcium-mediated signaling (GO:0050848)	Rgn	RefSeq	0.635261	-1.57416	585.668	358.583	1.61698e-13	Female	class_I	IA
RGS12	[TAD1005_chr5],[Plus],[Overlapping_Isoform_Count: 2],[Overlaps with:Mir3097]	chr5:35,292,096-35,376,242 chr5:35,341,726-35,376,242	NM_173402 NM_001163512	Regulator of G-protein signaling 12, regulator of G-protein signaling 12 isoform B;regulator of G-protein signaling 12 isoform A	GTPase activator activity (GO:0005096); cellular_component (GO:0005575); nucleus (GO:0005634); protein targeting (GO:0006605); signal transduction (GO:0007165)	Rgs12	RefSeq	0.644368	-1.55191	0.63428	0.389352	0.0142288	Female	class_II	IIA
RIAN	[TAD2521_chr12],[Plus],[Overlaps with:AF357355;AF357359;AF357425;AF357426;DQ267100;DQ267101;DQ267102;Mir1188;Mir341;Mir370]	chr12:110,842,154-110,899,921	NR_028261	RNA imprinted and accumulated in nucleus,	molecular_function (GO:0003674); nucleus (GO:0005634); biological_process (GO:0008150)	Rian	RefSeq	0.495189	-2.01943	1.70556	0.807241	0.000129738	Female	no_response	none
RND1	[TAD2996_chr15],[Minus]	chr15:98,499,635-98,507,892	NM_172612	Rho family GTPase 1, rho-related GTP-binding protein Rho6 precursor	nucleotide binding (GO:0000166); molecular_function (GO:0003674); GTPase activity (GO:0003924); GTP binding (GO:0005525); intracellular (GO:0005622); cytoplasm (GO:0005737); cytosol (GO:0005829); cytoskeleton (GO:0005856); plasma membrane (GO:0005886); adherens junction (GO:0005912); actin filament organization (GO:0007015); negative regulation of cell adhesion (GO:0007162); small GTPase mediated…	Rnd1	RefSeq	0.508417	-1.96689	4.70597	2.30332	0.000329544	Female	no_response	none
RSPH4A	[TAD2018_chr10],[Plus]	chr10:33,624,916-33,635,827	NM_001162957	Radial spoke head 4 homolog A (Chlamydomonas), radial spoke head protein 4 homolog A	molecular_function (GO:0003674); cellular_component (GO:0005575); cytoplasm (GO:0005737); cytoskeleton (GO:0005856); cilium (GO:0005929); biological_process (GO:0008150); cell projection (GO:0042995)	Rsph4a	RefSeq	0.00641719	-155.831	0.970708	0.00535393	1.65055e-64	Female	class_I	IA
RTN4	[TAD2202_chr11],[Plus],[Overlapping_Isoform_Count: 5]	chr11:29,592,897-29,644,414 chr11:29,593,773-29,644,414 chr11:29,618,562-29,644,414	NM_024226 NM_194054 NM_194053 NM_194052 NM_194051	Reticulon 4, reticulon-4 isoform B2;reticulon-4 isoform C;reticulon-4 isoform B1;reticulon-4 isoform A;reticulon-4 isoform D	angiogenesis (GO:0001525); protein binding (GO:0005515); nuclear envelope (GO:0005635); cytoplasm (GO:0005737); endoplasmic reticulum (GO:0005783); plasma membrane (GO:0005886); nervous system development (GO:0007399); negative regulation of neuron projection development (GO:0010977); membrane (GO:0016020); integral component of membrane (GO:0016021); obsolete negative regulation of anti-apoptosi…	Rtn4	RefSeq	0.440988	-2.26764	11.0141	4.6806	2.73898e-28	Female	class_II	IIA
S100A13	[TAD659_chr3],[Plus]	chr3:90,318,356-90,328,503	NM_009113	S100 calcium binding protein A13, protein S100-A13	calcium ion binding (GO:0005509); extracellular region (GO:0005576); extracellular space (GO:0005615); cytoplasm (GO:0005737); transport (GO:0006810); positive regulation of cell proliferation (GO:0008284); lipid binding (GO:0008289); regulation of cell shape (GO:0008360); protein transport (GO:0015031); metal ion binding (GO:0046872)	S100a13	RefSeq	0.63769	-1.56816	6.41493	3.89556	0.00114753	Female	no_response	none
SALL1	[TAD1708_chr8],[Minus]	chr8:91,551,142-91,568,061	NM_021390	Sal-like 1 (Drosophila), sal-like protein 1	negative regulation of transcription by RNA polymerase II (GO:0000122); ureteric bud development (GO:0001657); branching involved in ureteric bud morphogenesis (GO:0001658); ventricular septum development (GO:0003281); mesenchymal to epithelial transition involved in metanephros morphogenesis (GO:0003337); molecular_function (GO:0003674); nucleic acid binding (GO:0003676); DNA binding (GO:0003677…	Sall1	RefSeq	0.338446	-2.95468	5.74163	1.86957	2.19464e-42	Female	class_I	IA
SAMD9L	[TAD1167_chr6begin],[Minus]	chr6:3,322,256-3,349,571	NM_010156	Sterile alpha motif domain containing 9-like, sterile alpha motif domain-containing protein 9-like		Samd9l	RefSeq	0.608888	-1.64234	1.70568	1.00083	7.62682e-06	Female	no_response	none
SBK1	[TAD1567_chr7],[Plus]	chr7:133,416,132-133,438,513	NM_145587	SH3-binding kinase 1, serine/threonine-protein kinase SBK1	nucleotide binding (GO:0000166); protein kinase activity (GO:0004672); protein serine/threonine kinase activity (GO:0004674); protein tyrosine kinase activity (GO:0004713); protein binding (GO:0005515); ATP binding (GO:0005524); cellular_component (GO:0005575); cytoplasm (GO:0005737); protein phosphorylation (GO:0006468); kinase activity (GO:0016301); transferase activity (GO:0016740); peptidyl-s…	Sbk1	RefSeq	0.653194	-1.53094	3.33018	2.09588	5.92509e-05	Female	no_response	none
SDC1	[TAD2384_chr12],[Plus]	chr12:8,778,201-8,800,493	NM_011519	Syndecan 1, syndecan-1 precursor	uropod (GO:0001931); protein binding (GO:0005515); extracellular space (GO:0005615); cytoskeletal protein binding (GO:0008092); cell surface (GO:0009986); membrane (GO:0016020); integral component of membrane (GO:0016021); myoblast development (GO:0048627); canonical Wnt signaling pathway (GO:0060070)	Sdc1	RefSeq	0.592836	-1.68681	61.4515	35.1255	1.03063e-13	Female	no_response	none
SDPR	[TAD48_chr1],[Plus]	chr1:51,345,969-51,359,804	NM_138741	Serum deprivation response, serum deprivation-response protein	protein binding (GO:0005515); cytoplasm (GO:0005737); lipid binding (GO:0008289); membrane (GO:0016020); positive regulation of transcription by RNA polymerase II (GO:0045944)	Sdpr	RefSeq	0.602608	-1.65945	4.14029	2.391	1.1125e-08	Female	no_response	none
SEPT1	[TAD1570_chr7],[Minus]	chr7:134,357,955-134,361,959	NM_017461	Septin 1, septin-1	nucleotide binding (GO:0000166); cytokinesis (GO:0000910); protein binding (GO:0005515); GTP binding (GO:0005525); cytoplasm (GO:0005737); cytoskeleton (GO:0005856); cell cycle (GO:0007049); septin complex (GO:0031105); cell division (GO:0051301)	Sept1	RefSeq	0.50999	-1.96082	0.639396	0.31057	0.0104559	Female	no_response	none
SERPINA3G	[TAD2513_chr12],[Plus],[Overlaps with:Serpina3f]	chr12:105,452,753-105,480,144	NM_009251	Serine (or cysteine) peptidase inhibitor, clade A, member 3G, serine protease inhibitor A3G	endopeptidase inhibitor activity (GO:0004866); serine-type endopeptidase inhibitor activity (GO:0004867); cysteine-type endopeptidase inhibitor activity (GO:0004869); cellular_component (GO:0005575); nucleus (GO:0005634); cytoplasm (GO:0005737); apoptotic process (GO:0006915); negative regulation of peptidase activity (GO:0010466); negative regulation of endopeptidase activity (GO:0010951); pepti…	Serpina3g	RefSeq	0.297663	-3.3595	3.99514	1.14216	0.034777	Female	no_response	none
SERPINA6	[TAD2513_chr12],[Minus]	chr12:104,884,841-104,895,281	NM_007618	Serine (or cysteine) peptidase inhibitor, clade A, member 6, corticosteroid-binding globulin precursor	endopeptidase inhibitor activity (GO:0004866); serine-type endopeptidase inhibitor activity (GO:0004867); steroid binding (GO:0005496); extracellular region (GO:0005576); extracellular space (GO:0005615); transport (GO:0006810); glucocorticoid metabolic process (GO:0008211); lipid binding (GO:0008289); negative regulation of endopeptidase activity (GO:0010951)	Serpina6	RefSeq	0.468457	-2.13467	150.989	68.1832	1.19441e-16	Female	class_II	IIB
SERPINB1A	[TAD2580_chr13],[Minus]	chr13:32,933,960-32,943,054	NM_025429	Serine (or cysteine) peptidase inhibitor, clade B, member 1a, leukocyte elastase inhibitor A	endopeptidase inhibitor activity (GO:0004866); serine-type endopeptidase inhibitor activity (GO:0004867); cellular_component (GO:0005575); cytoplasm (GO:0005737); peptidase activity (GO:0008233); negative regulation of peptidase activity (GO:0010466); negative regulation of endopeptidase activity (GO:0010951); peptidase inhibitor activity (GO:0030414); regulation of protein catabolic process (GO:…	Serpinb1a	RefSeq	0.110096	-9.08295	3.65665	0.382406	1.35884e-32	Female	class_II	IIB
SERPINB8	[TAD131_chr1],[Plus],[Overlapping_Isoform_Count: 2]	chr1:109,486,582-109,505,555 chr1:109,486,582-109,502,727	NM_011459 NM_001159748	serine (or cysteine) peptidase inhibitor, clade B, member 8, serpin B8 isoform 2;serpin B8 isoform 1	molecular_function (GO:0003674); serine-type endopeptidase inhibitor activity (GO:0004867); cellular_component (GO:0005575); cytoplasm (GO:0005737); biological_process (GO:0008150); negative regulation of peptidase activity (GO:0010466); negative regulation of endopeptidase activity (GO:0010951); peptidase inhibitor activity (GO:0030414)	Serpinb8	RefSeq	0.522388	-1.91429	0.610556	0.30437	9.07073e-05	Female	no_response	none
SERPINE3	[TAD2802_chr14],[Plus]	chr14:63,282,503-63,311,080	NM_001199945	Serpin peptidase inhibitor, clade E (nexin, plasminogen activator inhibitor type 1), member 3, serpin E3 precursor	molecular_function (GO:0003674); cellular_component (GO:0005575); biological_process (GO:0008150)	Serpine3	RefSeq	0.282525	-3.53951	0.308059	0.0824224	0.0102608	Female	no_response	none
SETD4	[TAD3129_chr16],[Minus]	chr16:93,583,705-93,604,060	NM_145482	SET domain containing 4, SET domain-containing protein 4	molecular_function (GO:0003674); cellular_component (GO:0005575); nucleus (GO:0005634); biological_process (GO:0008150)	Setd4	RefSeq	0.557748	-1.79292	2.5455	1.36637	2.72908e-06	Female	no_response	none
SGSM1	[TAD1100_chr5],[Minus],[Overlapping_Isoform_Count: 5]	chr5:113,686,493-113,709,621 chr5:113,672,239-113,709,621 chr5:113,672,239-113,739,806 chr5:113,694,693-113,739,806 chr5:113,686,493-113,739,806	NM_172718 NM_001162965 NR_027934 NR_027936 NM_001254731	Small G protein signaling modulator 1, small G protein signaling modulator 1 isoform b;small G protein signaling modulator 1 isoform a;small G protein signaling modulator 1 isoform c;small G protein signaling modulator 1 isoform e;small G protein signaling modulator 1 isoform d	intracellular (GO:0005622); Golgi apparatus (GO:0005794)	Sgsm1	RefSeq	0.569477	-1.756	0.594828	0.324095	0.000287752	Female	no_response	none
SGSM2	[TAD2274_chr11],[Minus],[Overlaps with:Mir6926]	chr11:74,662,765-74,710,582	NM_197943	Small G protein signaling modulator 2, small G protein signaling modulator 2	intracellular (GO:0005622)	Sgsm2	RefSeq	0.641345	-1.55922	1.5036	0.92644	3.47005e-05	Female	no_response	none
SH2D4A	[TAD1675_chr8],[Plus]	chr8:70,800,426-70,871,603	NM_028182	SH2 domain containing 4A, SH2 domain-containing protein 4A	protein binding (GO:0005515); cytoplasm (GO:0005737)	Sh2d4a	RefSeq	0.407757	-2.45244	1.68683	0.66879	2.09569e-13	Female	no_response	none
SH3BGRL3	[TAD940_chr4],[Minus]	chr4:133,683,320-133,684,668	NM_080559	SH3 domain binding glutamic acid-rich protein-like 3, SH3 domain-binding glutamic acid-rich-like protein 3	molecular_function (GO:0003674); cellular_component (GO:0005575); nucleus (GO:0005634); cytoplasm (GO:0005737); biological_process (GO:0008150); electron transfer activity (GO:0009055); protein disulfide oxidoreductase activity (GO:0015035); cell redox homeostasis (GO:0045454)	Sh3bgrl3	RefSeq	0.641478	-1.5589	3.55313	2.17901	0.00626627	Female	class_II	IIA
SH3YL1	[TAD2409_chr12],[Plus],[Overlapping_Isoform_Count: 3]	chr12:31,596,533-31,645,025	NM_013709 NM_001289480 NR_110343	Sh3 domain YSC-like 1, SH3 domain-containing YSC84-like protein 1 isoform 2;SH3 domain-containing YSC84-like protein 1 isoform 1	molecular_function (GO:0003674); protein binding (GO:0005515); cellular_component (GO:0005575); biological_process (GO:0008150)	Sh3yl1	RefSeq	0.635876	-1.57263	3.74251	2.28207	0.000312686	Female	no_response	none
SHROOM1	[TAD2235_chr11],[Plus],[Overlapping_Isoform_Count: 2]	chr11:53,270,706-53,281,268	NM_027917 NM_001290789	Shroom family member 1, protein Shroom1 isoform 2;protein Shroom1 isoform 1	cell morphogenesis (GO:0000902); actin binding (GO:0003779); cytoplasm (GO:0005737); cytoskeleton (GO:0005856); microtubule (GO:0005874); myosin II complex (GO:0016460); actin filament binding (GO:0051015); actin filament bundle assembly (GO:0051017)	Shroom1	RefSeq	0.66144	-1.51185	6.08406	3.88834	1.83816e-05	Female	no_response	none
SKI	[TAD973_chr4end],[Minus]	chr4:154,528,183-154,596,644	NM_011385	Ski sarcoma viral oncogene homolog (avian), ski oncogene	negative regulation of transcription by RNA polymerase II (GO:0000122); nucleotide binding (GO:0000166); neural tube closure (GO:0001843); lens morphogenesis in camera-type eye (GO:0002089); chromatin binding (GO:0003682); transcription corepressor activity (GO:0003714); binding (GO:0005488); protein binding (GO:0005515); nucleus (GO:0005634); transcription factor complex (GO:0005667); cytoplasm …	Ski	RefSeq	0.658355	-1.51894	5.50605	3.48799	2.41583e-08	Female	no_response	none
SLC13A3	[TAD514_chr2],[Minus]	chr2:165,230,794-165,298,697	NM_054055	Solute carrier family 13 (sodium-dependent dicarboxylate transporter), member 3, solute carrier family 13 member 3	actin binding (GO:0003779); transporter activity (GO:0005215); dicarboxylic acid transmembrane transporter activity (GO:0005310); organic acid:sodium symporter activity (GO:0005343); extracellular space (GO:0005615); obsolete membrane fraction (GO:0005624); obsolete insoluble fraction (GO:0005626); transport (GO:0006810); ion transport (GO:0006811); sodium ion transport (GO:0006814); anion transp…	Slc13a3	RefSeq	0.573571	-1.74346	4.68177	2.5762	4.43257e-11	Female	class_I	IB
SLC15A3	[TAD3423_chr19],[Plus]	chr19:10,917,033-10,932,405	NM_023044	Solute carrier family 15, member 3, solute carrier family 15 member 3	molecular_function (GO:0003674); transporter activity (GO:0005215); lysosome (GO:0005764); lysosomal membrane (GO:0005765); transport (GO:0006810); oligopeptide transport (GO:0006857); biological_process (GO:0008150); protein transport (GO:0015031); symporter activity (GO:0015293); peptide transport (GO:0015833); membrane (GO:0016020); integral component of membrane (GO:0016021); transmembrane tr…	Slc15a3	RefSeq	0.585102	-1.7091	1.88962	1.07197	0.0441469	Female	no_response	none
SLC16A5	[TAD2365_chr11],[Plus]	chr11:115,323,786-115,335,712	NM_001080934	Solute carrier family 16 (monocarboxylic acid transporters), member 5, monocarboxylate transporter 6	molecular_function (GO:0003674); cellular_component (GO:0005575); biological_process (GO:0008150)	Slc16a5	RefSeq	0.151572	-6.59754	7.37281	1.07917	6.81719e-95	Female	class_II	IIA
SLC16A7	[TAD2158_chr10],[Minus]	chr10:124,664,540-124,765,591	NM_011391	Solute carrier family 16 (monocarboxylic acid transporters), member 7, monocarboxylate transporter 2	transporter activity (GO:0005215); obsolete membrane fraction (GO:0005624); plasma membrane (GO:0005886); integral component of plasma membrane (GO:0005887); transport (GO:0006810); symporter activity (GO:0015293); secondary active monocarboxylate transmembrane transporter activity (GO:0015355); organic anion transport (GO:0015711); monocarboxylic acid transport (GO:0015718); membrane (GO:0016020…	Slc16a7	RefSeq	0.47768	-2.09345	11.3436	5.21132	2.03665e-18	Female	class_II	IIB
SLC17A4	[TAD2564_chr13],[Minus]	chr13:23,989,757-24,006,876	NM_177016	Solute carrier family 17 (sodium phosphate), member 4, probable small intestine urate exporter	molecular_function (GO:0003674); cellular_component (GO:0005575); transport (GO:0006810); ion transport (GO:0006811); sodium ion transport (GO:0006814); biological_process (GO:0008150); symporter activity (GO:0015293); membrane (GO:0016020); integral component of membrane (GO:0016021); transmembrane transport (GO:0055085)	Slc17a4	RefSeq	0.621862	-1.60807	16.735	10.0301	1.29807e-11	Female	no_response	none
SLC22A26	[TAD3413_chr19],[Minus]	chr19:7,856,472-7,877,157	NM_146232			Slc22a26	RefSeq	0.0177346	-56.387	42.7129	0.753669	2.32748e-258	Female	class_I	IC
SLC22A27	[TAD3413_chr19],[Minus]	chr19:7,938,878-8,040,517	NM_134256			Slc22a27	RefSeq	0.0264212	-37.8484	8.05594	0.220516	2.21556e-147	Female	class_I	IC
SLC22A29	[TAD3413_chr19],[Minus]	chr19:8,234,657-8,293,329	NM_172776			Slc22a29	RefSeq	0.101033	-9.89774	1.37851	0.132204	9.16324e-23	Female	class_I	IA
SLC25A21	[TAD2444_chr12],[Minus],[Overlapping_Isoform_Count: 2]	chr12:57,813,620-58,298,459 chr12:57,813,620-58,261,630	NM_172577 NM_001167976	Solute carrier family 25 (mitochondrial oxodicarboxylate carrier), member 21, mitochondrial 2-oxodicarboxylate carrier isoform 1;mitochondrial 2-oxodicarboxylate carrier isoform 2	molecular_function (GO:0003674); binding (GO:0005488); mitochondrion (GO:0005739); mitochondrial inner membrane (GO:0005743); transport (GO:0006810); biological_process (GO:0008150); membrane (GO:0016020); integral component of membrane (GO:0016021); organelle inner membrane (GO:0019866); transmembrane transport (GO:0055085)	Slc25a21	RefSeq	0.650671	-1.53687	2.8174	1.76518	3.34776e-05	Female	no_response	none
SLC25A24	[TAD699_chr3],[Plus]	chr3:108,926,066-108,971,327	NM_172685	Solute carrier family 25 (mitochondrial carrier, phosphate carrier), member 24, calcium-binding mitochondrial carrier protein SCaMC-1	molecular_function (GO:0003674); binding (GO:0005488); calcium ion binding (GO:0005509); extracellular space (GO:0005615); mitochondrion (GO:0005739); mitochondrial inner membrane (GO:0005743); transport (GO:0006810); biological_process (GO:0008150); membrane (GO:0016020); integral component of membrane (GO:0016021); transmembrane transport (GO:0055085)	Slc25a24	RefSeq	0.546715	-1.82911	0.439617	0.232498	0.00778607	Female	no_response	none
SLC25A27	[TAD3205_chr17],[Minus]	chr17:43,778,848-43,803,964	NM_028711	Solute carrier family 25, member 27, mitochondrial uncoupling protein 4	molecular_function (GO:0003674); mitochondrion (GO:0005739); transport (GO:0006810); biological_process (GO:0008150); membrane (GO:0016020); integral component of membrane (GO:0016021); organelle inner membrane (GO:0019866)	Slc25a27	RefSeq	0.272379	-3.67136	0.462938	0.117978	1.70304e-08	Female	class_II	IIA
SLC25A34	[TAD960_chr4],[Minus]	chr4:141,174,739-141,179,749	NM_001013780	Solute carrier family 25, member 34, solute carrier family 25 member 34	molecular_function (GO:0003674); transporter activity (GO:0005215); binding (GO:0005488); mitochondrion (GO:0005739); mitochondrial inner membrane (GO:0005743); transport (GO:0006810); biological_process (GO:0008150); membrane (GO:0016020); integral component of membrane (GO:0016021); transmembrane transport (GO:0055085)	Slc25a34	RefSeq	0.647996	-1.54322	1.21098	0.765605	0.0299286	Female	no_response	none
SLC26A10	[TAD2162_chr10],[Minus]	chr10:126,609,481-126,617,701	NM_177615	Solute carrier family 26, member 10, solute carrier family 26 member 10	molecular_function (GO:0003674); transporter activity (GO:0005215); cellular_component (GO:0005575); transport (GO:0006810); biological_process (GO:0008150); antiporter activity (GO:0015297); membrane (GO:0016020); integral component of membrane (GO:0016021); transmembrane transport (GO:0055085)	Slc26a10	RefSeq	0.564541	-1.77135	0.832706	0.454579	0.00481246	Female	class_II	IIA
SLC34A2	[TAD1024_chr5],[Plus]	chr5:53,440,591-53,462,902	NM_011402	Solute carrier family 34 (sodium phosphate), member 2, sodium-dependent phosphate transport protein 2B	in utero embryonic development (GO:0001701); integral component of plasma membrane (GO:0005887); brush border (GO:0005903); transport (GO:0006810); ion transport (GO:0006811); sodium ion transport (GO:0006814); phosphate ion transport (GO:0006817); symporter activity (GO:0015293); sodium-dependent phosphate transmembrane transporter activity (GO:0015321); membrane (GO:0016020); integral component…	Slc34a2	RefSeq	0.394625	-2.53405	1.14484	0.436636	0.000106925	Female	class_I	IB
SLC39A5	[TAD2164_chr10],[Minus],[Overlapping_Isoform_Count: 3]	chr10:127,832,987-127,837,573 chr10:127,832,987-127,837,522 chr10:127,832,987-127,838,280	NM_028051 NM_028092 NM_001136237	Solute carrier family 39 (metal ion transporter), member 5, zinc transporter ZIP5 precursor	zinc ion transmembrane transporter activity (GO:0005385); plasma membrane (GO:0005886); transport (GO:0006810); ion transport (GO:0006811); zinc ion transport (GO:0006829); cellular zinc ion homeostasis (GO:0006882); membrane (GO:0016020); integral component of membrane (GO:0016021); basolateral plasma membrane (GO:0016323); metal ion transport (GO:0030001); ion transmembrane transport (GO:003422…	Slc39a5	RefSeq	0.480951	-2.07921	0.351001	0.157524	0.0191601	Female	no_response	none
SLC47A1	[TAD2251_chr11],[Minus]	chr11:61,156,901-61,191,577	NM_026183	Solute carrier family 47, member 1, multidrug and toxin extrusion protein 1	monovalent cation:proton antiporter activity (GO:0005451); obsolete membrane fraction (GO:0005624); plasma membrane (GO:0005886); transport (GO:0006810); drug transmembrane transport (GO:0006855); drug transmembrane transporter activity (GO:0015238); antiporter activity (GO:0015297); organic cation transport (GO:0015695); drug transport (GO:0015893); membrane (GO:0016020); integral component of m…	Slc47a1	RefSeq	0.652952	-1.53151	27.3305	17.2025	4.66953e-10	Female	no_response	none
SLC4A4	[TAD1062_chr5],[Plus],[Overlapping_Isoform_Count: 3]	chr5:89,316,284-89,668,681	NM_018760 NM_001136260 NM_001197147	Solute carrier family 4 (anion exchanger), member 4, electrogenic sodium bicarbonate cotransporter 1 isoform b;electrogenic sodium bicarbonate cotransporter 1 isoform a;electrogenic sodium bicarbonate cotransporter 1 isoform c	transporter activity (GO:0005215); inorganic anion exchanger activity (GO:0005452); plasma membrane (GO:0005886); integral component of plasma membrane (GO:0005887); transport (GO:0006810); ion transport (GO:0006811); sodium ion transport (GO:0006814); anion transport (GO:0006820); regulation of pH (GO:0006885); anion transmembrane transporter activity (GO:0008509); sodium:bicarbonate symporter a…	Slc4a4	RefSeq	0.665214	-1.50327	9.13448	5.84793	1.93488e-06	Female	class_II	IIA
SLC6A12	[TAD1351_chr6],[Plus]	chr6:121,296,714-121,315,791	NM_133661	Solute carrier family 6 (neurotransmitter transporter, betaine/GABA), member 12, sodium- and chloride-dependent betaine transporter	amino acid transmembrane transport (GO:0003333); neurotransmitter:sodium symporter activity (GO:0005328); gamma-aminobutyric acid:sodium symporter activity (GO:0005332); integral component of plasma membrane (GO:0005887); transport (GO:0006810); neurotransmitter transport (GO:0006836); cellular water homeostasis (GO:0009992); symporter activity (GO:0015293); gamma-aminobutyric acid transport (GO:…	Slc6a12	RefSeq	0.661409	-1.51192	21.6552	13.8052	4.99239e-08	Female	no_response	none
SLCO1A4	[TAD1389_chr6],[Minus]	chr6:141,753,960-141,804,692	NM_030687	Solute carrier organic anion transporter family, member 1a4, solute carrier organic anion transporter family member 1A4	transporter activity (GO:0005215); obsolete membrane fraction (GO:0005624); transport (GO:0006810); ion transport (GO:0006811); anion transport (GO:0006820); organic anion transmembrane transporter activity (GO:0008514); bile acid transmembrane transporter activity (GO:0015125); organic anion transport (GO:0015711); membrane (GO:0016020); integral component of membrane (GO:0016021); ion transmemb…	Slco1a4	RefSeq	0.290903	-3.43757	16.0291	4.48078	8.20536e-30	Female	class_II	IIB
SLFN8	[TAD2299_chr11],[Minus],[Overlapping_Isoform_Count: 2]	chr11:82,815,659-82,834,312 chr11:82,815,659-82,834,224	NM_181545 NM_001167743	Schlafen 8, schlafen 8 isoform 1;schlafen 8 isoform 2		Slfn8	RefSeq	0.473177	-2.11337	0.332026	0.149323	0.00225056	Female	no_response	none
SMIM24	[TAD2089_chr10],[Plus]	chr10:80,855,808-80,857,824	NM_001099917			Smim24	RefSeq	0.307599	-3.25098	0.646514	0.187027	0.00732234	Female	no_response	none
SMTNL2	[TAD2271_chr11],[Minus]	chr11:72,203,615-72,225,215	NM_177776	Smoothelin-like 2, smoothelin-like protein 2	molecular_function (GO:0003674); cellular_component (GO:0005575); biological_process (GO:0008150)	Smtnl2	RefSeq	0.443321	-2.2557	0.320677	0.133899	0.0184426	Female	class_II	IIB
SNAI2	[TAD3025_chr16],[Plus]	chr16:14,705,951-14,709,475	NM_011415	Snail homolog 2 (Drosophila), zinc finger protein SNAI2	negative regulation of transcription by RNA polymerase II (GO:0000122); nucleic acid binding (GO:0003676); DNA binding (GO:0003677); intracellular (GO:0005622); nucleus (GO:0005634); regulation of transcription, DNA-templated (GO:0006355); multicellular organism development (GO:0007275); zinc ion binding (GO:0008270); response to radiation (GO:0009314); embryo development (GO:0009790); obsolete r…	Snai2	RefSeq	0.658048	-1.51965	1.55475	0.965922	0.019756	Female	no_response	none
SNX12	[TAD3561_chrX],[Minus],[Overlapping_Isoform_Count: 3]	chrX:98,293,124-98,417,902 chrX:98,407,299-98,417,902	NM_018875 NM_001110311 NM_001110310	Sorting nexin 12, sorting nexin-12 isoform 3;sorting nexin-12 isoform 2;sorting nexin-12 isoform 1	molecular_function (GO:0003674); protein binding (GO:0005515); cellular_component (GO:0005575); transport (GO:0006810); cell communication (GO:0007154); biological_process (GO:0008150); protein transport (GO:0015031); phosphatidylinositol binding (GO:0035091)	Snx12	RefSeq	0.663847	-1.50637	3.16985	2.02668	3.16031e-05	Female	no_response	none
SORL1	[TAD1817_chr9],[Minus]	chr9:41,776,571-41,932,372	NM_011436	Sortilin-related receptor, LDLR class A repeats-containing, sortilin-related receptor precursor	lipid transporter activity (GO:0005319); multivesicular body (GO:0005771); lipid metabolic process (GO:0006629); transport (GO:0006810); lipid transport (GO:0006869); endocytosis (GO:0006897); signal transduction (GO:0007165); multicellular organism development (GO:0007275); steroid metabolic process (GO:0008202); cholesterol metabolic process (GO:0008203); membrane (GO:0016020); integral compone…	Sorl1	RefSeq	0.515824	-1.93864	0.357995	0.178991	4.55261e-05	Female	class_II	IIA
SOX7	[TAD2807_chr14],[Plus]	chr14:64,562,542-64,569,569	NM_011446	SRY-box containing gene 7, transcription factor SOX-7	DNA binding (GO:0003677); DNA binding transcription factor activity (GO:0003700); transcription factor activity, RNA polymerase II distal enhancer sequence-specific binding (GO:0003705); nucleus (GO:0005634); transcription factor complex (GO:0005667); cytoplasm (GO:0005737); regulation of transcription, DNA-templated (GO:0006355); regulation of transcription by RNA polymerase II (GO:0006357); obs…	Sox7	RefSeq	0.555837	-1.79909	0.504785	0.261172	0.00736974	Female	no_response	none
SPARCL1	[TAD1085_chr5],[Minus]	chr5:104,508,127-104,543,107	NM_010097	SPARC-like 1 (mast9, hevin), SPARC-like protein 1 precursor	calcium ion binding (GO:0005509); extracellular region (GO:0005576); (GO:0005578); signal transduction (GO:0007165); synapse (GO:0045202)	Sparcl1	RefSeq	0.564057	-1.77287	1.25302	0.685081	0.00576549	Female	class_II	IIA
SPIC	[TAD2100_chr10],[Minus]	chr10:88,138,014-88,145,768	NM_011461	Spi-C transcription factor (Spi-1/PU.1 related), transcription factor Spi-C	DNA binding (GO:0003677); DNA binding transcription factor activity (GO:0003700); nucleus (GO:0005634); transcription factor complex (GO:0005667); regulation of transcription, DNA-templated (GO:0006355); sequence-specific DNA binding (GO:0043565)	Spic	RefSeq	0.447747	-2.2334	2.11828	0.910509	0.0236039	Female	class_II	IIA
SPICE1	[TAD3081_chr16],[Plus]	chr16:44,347,513-44,388,605	NM_144550			Spice1	RefSeq	0.640959	-1.56016	0.560878	0.338979	0.0098227	Female	no_response	none
SPRED1	[TAD434_chr2],[Plus],[Overlapping_Isoform_Count: 2]	chr2:116,946,806-117,008,013 chr2:116,946,806-116,998,589	NM_033524 NM_001277256	Sprouty protein with EVH-1 domain 1, related sequence, sprouty-related, EVH1 domain-containing protein 1 isoform 1;sprouty-related, EVH1 domain-containing protein 1 isoform 2	inactivation of MAPK activity (GO:0000188); stem cell factor receptor binding (GO:0005173); protein binding (GO:0005515); nucleus (GO:0005634); plasma membrane (GO:0005886); multicellular organism development (GO:0007275); regulation of signal transduction (GO:0009966); membrane (GO:0016020)	Spred1	RefSeq	0.624074	-1.60237	2.34554	1.41372	2.67829e-08	Female	no_response	none
SRC	[TAD504_chr2],[Plus],[Overlapping_Isoform_Count: 2]	chr2:157,250,028-157,297,574	NM_009271 NM_001025395	Rous sarcoma oncogene, neuronal proto-oncogene tyrosine-protein kinase Src isoform 1;neuronal proto-oncogene tyrosine-protein kinase Src isoform 2	nucleotide binding (GO:0000166); protein kinase activity (GO:0004672); protein serine/threonine kinase activity (GO:0004674); protein tyrosine kinase activity (GO:0004713); non-membrane spanning protein tyrosine kinase activity (GO:0004715); protein kinase C binding (GO:0005080); signaling receptor binding (GO:0005102); insulin receptor binding (GO:0005158); protein binding (GO:0005515); ATP bind…	Src	RefSeq	0.540523	-1.85006	0.964273	0.5023	4.54582e-07	Female	no_response	none
SRGAP3	[TAD1327_chr6],[Minus]	chr6:112,667,965-112,897,260	NM_080448	SLIT-ROBO Rho GTPase activating protein 3, SLIT-ROBO Rho GTPase-activating protein 3	GTPase activator activity (GO:0005096); protein binding (GO:0005515); cellular_component (GO:0005575); intracellular (GO:0005622); signal transduction (GO:0007165); biological_process (GO:0008150); regulation of catalytic activity (GO:0050790)	Srgap3	RefSeq	0.103693	-9.64383	0.356447	0.0359872	2.22005e-21	Female	class_I	IA
SRL	[TAD3009_chr16],[Minus]	chr16:4,480,227-4,523,053	NM_175347	Sarcalumenin, sarcalumenin precursor	GTPase activity (GO:0003924); calcium ion binding (GO:0005509); GTP binding (GO:0005525); extracellular space (GO:0005615); obsolete GTP catabolic process (GO:0006184); sarcoplasmic reticulum (GO:0016529)	Srl	RefSeq	0.613907	-1.62891	0.295279	0.171299	0.0371511	Female	no_response	none
SRRM4	[TAD1103_chr5],[Minus]	chr5:116,889,281-117,041,826	NM_026886	Serine/arginine repetitive matrix 4, serine/arginine repetitive matrix protein 4	RNA binding (GO:0003723); mRNA binding (GO:0003729); nucleus (GO:0005634); mRNA processing (GO:0006397); nervous system development (GO:0007399); RNA splicing (GO:0008380); cell differentiation (GO:0030154); regulation of RNA splicing (GO:0043484)	Srrm4	RefSeq	0.584172	-1.71182	0.558133	0.315142	0.0352167	Female	no_response	none
ST6GALNAC4	[TAD318_chr2],[Plus],[Overlapping_Isoform_Count: 2]	chr2:32,442,597-32,455,216	NM_011373 NM_001276425	ST6 (alpha-N-acetyl-neuraminyl-2,3-beta-galactosyl-1,3)-N-acetylgalactosaminide alpha-2,6-sialyltransferase 4, alpha-N-acetyl-neuraminyl-2,3-beta-galactosyl-1, 3-N-acetyl-galactosaminide alpha-2,6-sialyltransferase	extracellular space (GO:0005615); Golgi apparatus (GO:0005794); protein glycosylation (GO:0006486); sialyltransferase activity (GO:0008373); membrane (GO:0016020); integral component of membrane (GO:0016021); transferase activity (GO:0016740); transferase activity, transferring glycosyl groups (GO:0016757); integral component of Golgi membrane (GO:0030173); (alpha-N-acetylneuraminyl-2,3-beta-gala…	St6galnac4	RefSeq	0.496552	-2.01389	0.599118	0.286169	2.46028e-06	Female	no_response	none
STAMBPL1	[TAD3467_chr19],[Plus]	chr19:34,266,759-34,314,818	NM_029682	Stam binding protein like 1, AMSH-like protease	molecular_function (GO:0003674); obsolete ubiquitin thiolesterase activity (GO:0004221); cellular_component (GO:0005575); extracellular space (GO:0005615); biological_process (GO:0008150); peptidase activity (GO:0008233); metallopeptidase activity (GO:0008237); hydrolase activity (GO:0016787); metal ion binding (GO:0046872)	Stambpl1	RefSeq	0.35772	-2.79548	0.85017	0.294293	7.28006e-08	Female	no_response	none
STAT1	[TAD51_chr1],[Plus],[Overlapping_Isoform_Count: 3]	chr1:52,176,281-52,218,709 chr1:52,176,465-52,218,709	NM_009283 NM_001205314 NM_001205313	Signal transducer and activator of transcription 1, signal transducer and activator of transcription 1 isoform 2;signal transducer and activator of transcription 1 isoform 1	DNA binding (GO:0003677); DNA binding transcription factor activity (GO:0003700); signal transducer activity (GO:0004871); calcium ion binding (GO:0005509); protein binding (GO:0005515); nucleus (GO:0005634); cytoplasm (GO:0005737); regulation of transcription, DNA-templated (GO:0006355); signal transduction (GO:0007165); JAK-STAT cascade (GO:0007259); response to nutrient (GO:0007584); blood cir…	Stat1	RefSeq	0.583402	-1.71408	7.92856	4.45305	0.0143514	Female	no_response	none
STK39	[TAD361_chr2],[Minus]	chr2:68,048,503-68,310,038	NM_016866	Serine/threonine kinase 39, STE20/SPS1 homolog (yeast), STE20/SPS1-related proline-alanine-rich protein kinase	nucleotide binding (GO:0000166); protein kinase activity (GO:0004672); protein serine/threonine kinase activity (GO:0004674); protein binding (GO:0005515); ATP binding (GO:0005524); obsolete membrane fraction (GO:0005624); nucleus (GO:0005634); cytoplasm (GO:0005737); cytoskeleton (GO:0005856); protein phosphorylation (GO:0006468); kinase activity (GO:0016301); basolateral plasma membrane (GO:001…	Stk39	RefSeq	0.621729	-1.60842	0.556403	0.333003	0.0130368	Female	no_response	none
SULT1A1	[TAD1569_chr7],[Minus]	chr7:133,816,383-133,819,871	NM_133670	Sulfotransferase family 1A, phenol-preferring, member 1, sulfotransferase 1A1	nucleotide binding (GO:0000166); aryl sulfotransferase activity (GO:0004062); cytoplasm (GO:0005737); cytosol (GO:0005829); catecholamine metabolic process (GO:0006584); lipid metabolic process (GO:0006629); xenobiotic metabolic process (GO:0006805); response to stress (GO:0006950); sulfotransferase activity (GO:0008146); steroid metabolic process (GO:0008202); estrogen metabolic process (GO:0008…	Sult1a1	RefSeq	0.357806	-2.79481	132.402	45.6702	3.38669e-55	Female	no_response	none
SULT1C2	[TAD3218_chr17],[Minus]	chr17:53,968,961-53,985,283	NM_026935	Sulfotransferase family, cytosolic, 1C, member 2, sulfotransferase 1C2	lysosome (GO:0005764); sulfotransferase activity (GO:0008146); biological_process (GO:0008150); transferase activity (GO:0016740)	Sult1c2	RefSeq	0.519046	-1.92661	2.97234	1.49511	2.28098e-08	Female	no_response	none
SULT1D1	[TAD1060_chr5],[Minus]	chr5:87,983,674-87,998,031	NM_016771	Sulfotransferase family 1D, member 1, sulfotransferase 1 family member D1	sulfate assimilation (GO:0000103); aryl sulfotransferase activity (GO:0004062); sulfotransferase activity (GO:0008146); transferase activity (GO:0016740); tyrosine-ester sulfotransferase activity (GO:0017067)	Sult1d1	RefSeq	0.399567	-2.50271	35.5351	13.6674	1.04769e-31	Female	no_response	none
SULT1E1	[TAD1060_chr5],[Minus]	chr5:88,004,992-88,020,636	NM_023135	Sulfotransferase family 1E, member 1, estrogen sulfotransferase, testis isoform	estrone sulfotransferase activity (GO:0004304); steroid binding (GO:0005496); cytoplasm (GO:0005737); female pregnancy (GO:0007565); sulfotransferase activity (GO:0008146); estrogen metabolic process (GO:0008210); lipid binding (GO:0008289); transferase activity (GO:0016740)	Sult1e1	RefSeq	0.265868	-3.76127	0.257515	0.0660791	0.00606743	Female	class_I	IA
SULT2A1	[TAD1413_chr7],[Minus]	chr7:14,381,594-14,422,759	NM_001111296	Sulfotransferase family 2A, dehydroepiandrosterone (DHEA)-preferring, member 1, bile salt sulfotransferase 1	cytoplasm (GO:0005737); lipid metabolic process (GO:0006629); sulfotransferase activity (GO:0008146); steroid metabolic process (GO:0008202); transferase activity (GO:0016740); bile-salt sulfotransferase activity (GO:0047704)	Sult2a1	RefSeq	0.000686796	-1456.04	114.897	0.0814015	4.2314e-199	Female	class_I	IC
SULT2A2	[TAD1412_chr7],[Plus]	chr7:14,318,854-14,364,986	NM_009286	sulfotransferase family 2A, dehydroepiandrosterone (DHEA)-preferring, member 2, bile salt sulfotransferase 2		Sult2a2	RefSeq	0.000231539	-4318.93	76.2851	0.0158309	0	Female	class_II	IIA
SULT2A3	[TAD1413_chr7],[Minus]	chr7:14,652,903-14,708,342	NM_001101586	sulfotransferase family 2A, dehydroepiandrosterone (DHEA)-preferring, member 3, sulfotransferase family 2A member 1 family member	molecular_function (GO:0003674); cellular_component (GO:0005575); biological_process (GO:0008150)	Sult2a3	RefSeq	0.000508448	-1966.77	8.11666	0	4.14753e-24	Female	class_II	IIA
SULT2A5	[TAD1412_chr7],[Plus]	chr7:14,209,315-14,256,156	NM_001184980			Sult2a5	RefSeq	0.000166101	-6020.42	20.3427	0	5.06475e-150	Female	class_II	IIA
SULT2A6	[TAD1413_chr7],[Minus]	chr7:14,807,751-14,840,219	NM_001081325	sulfotransferase family 2A, dehydroepiandrosterone (DHEA)-preferring, member 6, sulfotransferase family 2A member 1 family member	molecular_function (GO:0003674); cellular_component (GO:0005575); biological_process (GO:0008150)	Sult2a6	RefSeq	0.00118137	-846.475	11.438	0.012106	6.70613e-165	Female	class_II	IIB
SULT3A1	[TAD2018_chr10],[Plus]	chr10:33,577,527-33,599,281	NM_020565	Sulfotransferase family 3A, member 1, amine sulfotransferase	cytoplasm (GO:0005737); sulfotransferase activity (GO:0008146); transferase activity (GO:0016740); amine sulfotransferase activity (GO:0047685)	Sult3a1	RefSeq	0.000290227	-3445.58	310.415	0.0795177	0	Female	class_I	IA
SYBU	[TAD2921_chr15],[Minus],[Overlapping_Isoform_Count: 8]	chr15:44,503,402-44,584,004 chr15:44,503,402-44,538,034 chr15:44,503,402-44,580,218 chr15:44,503,402-44,619,609	NM_001032727 NM_176998 NM_178765 NM_001285840 NM_001285841 NM_001285842 NM_001285843 NM_001285844	syntabulin (syntaxin-interacting), syntabulin isoform d;syntabulin isoform c;syntabulin isoform e;syntabulin isoform a;syntabulin isoform b;syntabulin isoform f	molecular_function (GO:0003674); cellular_component (GO:0005575); Golgi apparatus (GO:0005794); biological_process (GO:0008150); membrane (GO:0016020); integral component of membrane (GO:0016021)	Sybu	RefSeq	0.0574751	-17.3988	1.13639	0.0631792	1.61048e-44	Female	class_II	IIA
SYK	[TAD2620_chr13],[Plus],[Overlapping_Isoform_Count: 2]	chr13:52,692,250-52,744,161 chr13:52,678,805-52,744,161	NM_011518 NM_001198977	Spleen tyrosine kinase, tyrosine-protein kinase SYK	activation of MAPK activity (GO:0000187); ATP binding (GO:0005524); cell surface receptor signaling pathway (GO:0007166); enzyme linked receptor protein signaling pathway (GO:0007167); G-protein coupled receptor signaling pathway (GO:0007186); activation of JUN kinase activity (GO:0007257); B cell receptor complex (GO:0019815); T cell receptor complex (GO:0042101); protein autophosphorylation (GO…	Syk	RefSeq	0.576901	-1.7334	0.967122	0.536814	0.00482121	Female	no_response	none
SYTL5	[TAD3514_chrX],[Plus],[Overlapping_Isoform_Count: 2]	chrX:9,462,746-9,575,990	NM_177704 NM_001290728	Synaptotagmin-like 5, synaptotagmin-like protein 5 isoform 1;synaptotagmin-like protein 5 isoform 2	protein binding (GO:0005515); cellular_component (GO:0005575); intracellular protein transport (GO:0006886); exocytosis (GO:0006887); zinc ion binding (GO:0008270); membrane (GO:0016020); Rab GTPase binding (GO:0017137); metal ion binding (GO:0046872); regulation of catalytic activity (GO:0050790)	Sytl5	RefSeq	0.142093	-7.03765	0.455741	0.0598399	7.70021e-13	Female	class_I	IA
TBC1D8	[TAD36_chr1],[Minus]	chr1:39,428,341-39,535,592	NM_018775	TBC1 domain family, member 8, TBC1 domain family member 8	molecular_function (GO:0003674); GTPase activator activity (GO:0005096); cellular_component (GO:0005575); intracellular (GO:0005622); biological_process (GO:0008150)	Tbc1d8	RefSeq	0.664058	-1.50589	1.92309	1.22848	0.0001701	Female	no_response	none
TCF7	[TAD2233_chr11],[Minus]	chr11:52,066,105-52,095,752	NM_009331	Transcription factor 7, T-cell specific, transcription factor 7	DNA binding (GO:0003677); DNA binding transcription factor activity (GO:0003700); nucleus (GO:0005634); transcription factor complex (GO:0005667); regulation of transcription, DNA-templated (GO:0006355); Wnt signaling pathway (GO:0016055); neural tube development (GO:0021915); embryonic genitalia morphogenesis (GO:0030538); regulation of cell proliferation (GO:0042127); regulation of apoptotic pr…	Tcf7	RefSeq	0.634455	-1.57615	1.02501	0.624389	0.00551015	Female	no_response	none
TCN2	[TAD2164_chr11begin],[Minus],[Overlapping_Isoform_Count: 3]	chr11:3,817,082-3,832,047 chr11:3,817,080-3,831,964 chr11:3,817,082-3,832,081	NM_015749 NM_001130459 NM_001130458	Transcobalamin 2, transcobalamin-2 precursor	binding (GO:0005488); extracellular region (GO:0005576); extracellular space (GO:0005615); transport (GO:0006810); ion transport (GO:0006811); cobalt ion transport (GO:0006824); cobalt ion transmembrane transporter activity (GO:0015087); cobalamin transport (GO:0015889); cobalamin binding (GO:0031419)	Tcn2	RefSeq	0.627174	-1.59445	37.5897	22.7451	4.44652e-11	Female	no_response	none
TEAD1	[TAD1537_chr7],[Plus],[Overlapping_Isoform_Count: 3]	chr7:119,902,897-120,050,319 chr7:119,822,833-120,050,319	NM_009346 NM_001166584 NM_001166585	TEA domain family member 1, transcriptional enhancer factor TEF-1 isoform 1;transcriptional enhancer factor TEF-1 isoform 3;transcriptional enhancer factor TEF-1 isoform 2	molecular_function (GO:0003674); DNA binding (GO:0003677); DNA binding transcription factor activity (GO:0003700); protein binding (GO:0005515); cellular_component (GO:0005575); nucleus (GO:0005634); transcription factor complex (GO:0005667); regulation of transcription, DNA-templated (GO:0006355); heart development (GO:0007507); biological_process (GO:0008150); obsolete transcription activator a…	Tead1	RefSeq	0.53807	-1.85849	0.865183	0.444929	6.65964e-07	Female	no_response	none
TENM3	[TAD1657_chr8],[Minus],[Overlapping_Isoform_Count: 2]	chr8:49,311,018-49,760,044	NM_011857 NM_001145937			Tenm3	RefSeq	0.5748	-1.73974	1.21118	0.672213	3.90381e-08	Female	no_response	none
TGM1	[TAD2787_chr14],[Minus],[Overlapping_Isoform_Count: 3]	chr14:56,318,845-56,331,925 chr14:56,318,845-56,332,329	NM_019984 NM_001161715 NM_001161714	Transglutaminase 1, K polypeptide, protein-glutamine gamma-glutamyltransferase K	protein-glutamine gamma-glutamyltransferase activity (GO:0003810); calcium ion binding (GO:0005509); obsolete membrane fraction (GO:0005624); cell-cell adherens junction (GO:0005913); cellular protein modification process (GO:0006464); animal organ morphogenesis (GO:0009887); membrane (GO:0016020); transferase activity (GO:0016740); peptide cross-linking (GO:0018149); protein metabolic process (G…	Tgm1	RefSeq	0.643443	-1.55414	5.51194	3.4218	0.00036707	Female	no_response	none
TGTP1	[TAD2226_chr11],[Minus],[Overlaps with:Tgtp2],[Multi-counted reads: Whole_gene_body, Exon-only_counting, Intron-only_counting]	chr11:48,798,830-48,805,748	NM_011579	T-cell specific GTPase 1, T-cell specific GTPase	GTP binding (GO:0005525); cellular_component (GO:0005575)	Tgtp1	RefSeq	0.168365	-5.93948	7.07964	1.14253	0.000765835	Female	class_I	IC
TGTP2	[TAD2226_chr11],[Minus],[nonOverlapping_Isoform_Count: 2],[Overlaps with:Tgtp1]	chr11:48,870,697-48,877,714 chr11:48,798,830-48,805,756	NM_001145164	T-cell specific GTPase 2, T-cell specific GTPase 2	molecular_function (GO:0003674); cellular_component (GO:0005575); biological_process (GO:0008150)	Tgtp2	RefSeq	0.171739	-5.8228	5.50806	0.907203	0.000758665	Female	class_I	IC
THBS2	[TAD3158_chr17],[Minus]	chr17:14,802,506-14,831,269	NM_011581	Thrombospondin 2, thrombospondin-2 precursor	structural molecule activity (GO:0005198); calcium ion binding (GO:0005509); protein binding (GO:0005515); extracellular region (GO:0005576); extracellular space (GO:0005615); cell adhesion (GO:0007155); heparin binding (GO:0008201); negative regulation of angiogenesis (GO:0016525); positive regulation of synapse assembly (GO:0051965)	Thbs2	RefSeq	0.570087	-1.75412	0.481971	0.262755	0.000150305	Female	no_response	none
THY1	[TAD1821_chr9],[Plus]	chr9:43,851,466-43,856,662	NM_009382	Thymus cell antigen 1, theta, thy-1 membrane glycoprotein preproprotein	angiogenesis (GO:0001525); protein binding (GO:0005515); cytosol (GO:0005829); plasma membrane (GO:0005886); negative regulation of protein kinase activity (GO:0006469); cytoskeleton organization (GO:0007010); external side of plasma membrane (GO:0009897); cell surface (GO:0009986); membrane (GO:0016020); enzyme binding (GO:0019899); protein kinase binding (GO:0019901); negative regulation of cel…	Thy1	RefSeq	0.454315	-2.20112	0.534668	0.235134	0.0013466	Female	no_response	none
TIMD4	[TAD2225_chr11],[Plus]	chr11:46,624,300-46,657,835	NM_178759	T-cell immunoglobulin and mucin domain containing 4, T-cell immunoglobulin and mucin domain-containing protein 4 precursor	membrane (GO:0016020); integral component of membrane (GO:0016021)	Timd4	RefSeq	0.625777	-1.59801	3.36886	2.03234	0.0138529	Female	class_I	IA
TLR13	[TAD3568_chrX],[Plus]	chrX:103,338,613-103,355,832	NM_205820	Toll-like receptor 13, toll-like receptor 13 precursor	molecular_function (GO:0003674); transmembrane signaling receptor activity (GO:0004888); protein binding (GO:0005515); cellular_component (GO:0005575); inflammatory response (GO:0006954); signal transduction (GO:0007165); biological_process (GO:0008150); membrane (GO:0016020); integral component of membrane (GO:0016021); intrinsic component of membrane (GO:0031224); innate immune response (GO:004…	Tlr13	RefSeq	0.663393	-1.5074	0.515709	0.328392	0.032912	Female	no_response	none
TM4SF4	[TAD603_chr3],[Plus]	chr3:57,229,331-57,245,597	NM_145539	Transmembrane 4 superfamily member 4, transmembrane 4 L6 family member 4	molecular_function (GO:0003674); cellular_component (GO:0005575); biological_process (GO:0008150); membrane (GO:0016020); integral component of membrane (GO:0016021)	Tm4sf4	RefSeq	0.648461	-1.54211	39.7217	24.8045	6.44598e-10	Female	no_response	none
TM6SF2	[TAD1680_chr8],[Plus],[Overlapping_Isoform_Count: 2]	chr8:72,596,822-72,603,965	NM_181540 NM_001293795	Transmembrane 6 superfamily member 2, transmembrane 6 superfamily member 2 isoform 2;transmembrane 6 superfamily member 2 isoform 1	membrane (GO:0016020); integral component of membrane (GO:0016021)	Tm6sf2	RefSeq	0.516376	-1.93657	14.7085	7.3206	4.68183e-16	Female	no_response	none
TMEM173	[TAD3314_chr18],[Minus],[Overlapping_Isoform_Count: 3]	chr18:35,893,331-35,900,208	NM_028261 NM_001289591 NM_001289592	Transmembrane protein 173, stimulator of interferon genes protein isoform 3;stimulator of interferon genes protein isoform 1;stimulator of interferon genes protein isoform 2	mitochondrion (GO:0005739); mitochondrial outer membrane (GO:0005741); endoplasmic reticulum (GO:0005783); plasma membrane (GO:0005886); apoptotic process (GO:0006915); membrane (GO:0016020); integral component of membrane (GO:0016021); innate immune response (GO:0045087)	Tmem173	RefSeq	0.566283	-1.7659	0.636896	0.346749	0.0464788	Female	no_response	none
TMEM200B	[TAD937_chr4],[Plus]	chr4:131,477,685-131,479,055	NM_001201367	transmembrane protein 200B, transmembrane protein 200B	molecular_function (GO:0003674); cellular_component (GO:0005575); biological_process (GO:0008150)	Tmem200b	RefSeq	0.503712	-1.98526	0.834704	0.404423	0.0033444	Female	class_II	IIB
TMEM26	[TAD2068_chr10],[Plus]	chr10:68,186,493-68,245,402	NM_177794	Transmembrane protein 26, transmembrane protein 26	molecular_function (GO:0003674); cellular_component (GO:0005575); biological_process (GO:0008150); membrane (GO:0016020); integral component of membrane (GO:0016021)	Tmem26	RefSeq	0.445851	-2.2429	0.29994	0.130193	0.000102777	Female	no_response	none
TMEM98	[TAD2294_chr11],[Plus]	chr11:80,623,916-80,635,535	NM_029537	Transmembrane protein 98, transmembrane protein 98	molecular_function (GO:0003674); cellular_component (GO:0005575); extracellular space (GO:0005615); biological_process (GO:0008150); membrane (GO:0016020); integral component of membrane (GO:0016021)	Tmem98	RefSeq	0.484436	-2.06425	5.18687	2.42318	3.01251e-10	Female	class_II	IIA
TMSB4X	[TAD3614_chrX],[Minus]	chrX:163,645,025-163,647,150	NM_021278	Thymosin, beta 4, X chromosome, thymosin beta-4	actin binding (GO:0003779); protein binding (GO:0005515); extracellular region (GO:0005576); nucleus (GO:0005634); cytoplasm (GO:0005737); cytosol (GO:0005829); cytoskeleton (GO:0005856); cytoskeleton organization (GO:0007010); actin cytoskeleton organization (GO:0030036); regulation of cell migration (GO:0030334); platelet alpha granule lumen (GO:0031093); sequestering of actin monomers (GO:0042…	Tmsb4x	RefSeq	0.6653	-1.50308	91.4695	58.5782	0.000121326	Female	no_response	none
TNFAIP8	[TAD3340_chr18],[Plus],[Overlapping_Isoform_Count: 3]	chr18:50,212,935-50,252,883 chr18:50,139,080-50,252,883	NM_134131 NM_001177760 NM_001177759	Tumor necrosis factor, alpha-induced protein 8, tumor necrosis factor alpha-induced protein 8 isoform 1;tumor necrosis factor alpha-induced protein 8 isoform 3;tumor necrosis factor alpha-induced protein 8 isoform 2	molecular_function (GO:0003674); cellular_component (GO:0005575); cytoplasm (GO:0005737); apoptotic process (GO:0006915); biological_process (GO:0008150)	Tnfaip8	RefSeq	0.588775	-1.69844	0.437191	0.239927	0.0142135	Female	no_response	none
TNFAIP8L3	[TAD1841_chr9],[Minus]	chr9:53,873,412-53,916,218	NM_001033535	Tumor necrosis factor, alpha-induced protein 8-like 3, tumor necrosis factor alpha-induced protein 8-like protein 3	molecular_function (GO:0003674); cellular_component (GO:0005575); biological_process (GO:0008150)	Tnfaip8l3	RefSeq	0.360656	-2.77272	0.424249	0.142555	3.23114e-05	Female	no_response	none
TNFSF10	[TAD565_chr3],[Plus]	chr3:27,215,998-27,238,587	NM_009425	Tumor necrosis factor (ligand) superfamily, member 10, tumor necrosis factor ligand superfamily member 10	cytokine activity (GO:0005125); tumor necrosis factor receptor binding (GO:0005164); protein binding (GO:0005515); extracellular space (GO:0005615); apoptotic process (GO:0006915); immune response (GO:0006955); membrane (GO:0016020); integral component of membrane (GO:0016021); positive regulation of apoptotic process (GO:0043065)	Tnfsf10	RefSeq	0.624507	-1.60126	1.50002	0.89295	6.45798e-05	Female	class_II	IIA
TNIK	[TAD568_chr3],[Plus],[Overlapping_Isoform_Count: 4],[Overlaps with:Mir466q]	chr3:28,162,135-28,565,371 chr3:28,162,135-28,569,507	NM_026910 NM_001163007 NM_001163009 NM_001163008	TRAF2 and NCK interacting kinase, traf2 and NCK-interacting protein kinase isoform 1;traf2 and NCK-interacting protein kinase isoform 3;traf2 and NCK-interacting protein kinase isoform 4;traf2 and NCK-interacting protein kinase isoform 2	nucleotide binding (GO:0000166); molecular_function (GO:0003674); protein kinase activity (GO:0004672); protein serine/threonine kinase activity (GO:0004674); ATP binding (GO:0005524); cellular_component (GO:0005575); nucleus (GO:0005634); cytoplasm (GO:0005737); protein phosphorylation (GO:0006468); biological_process (GO:0008150); Wnt signaling pathway (GO:0016055); kinase activity (GO:0016301)…	Tnik	RefSeq	0.638792	-1.56546	0.328748	0.202536	0.0486284	Female	no_response	none
TOX	[TAD772_chr4],[Minus]	chr4:6,614,532-6,917,870	NM_145711	Thymocyte selection-associated high mobility group box, thymocyte selection-associated high mobility group box protein TOX	DNA binding (GO:0003677); nucleus (GO:0005634)	Tox	RefSeq	0.175361	-5.70251	1.20335	0.20063	1.36971e-14	Female	class_II	IIB
TREML4	[TAD3211_chr17],[Plus],[Overlapping_Isoform_Count: 4]	chr17:48,403,660-48,414,724	NM_172623 NM_001163795 NM_001033922 NM_001163796	Triggering receptor expressed on myeloid cells-like 4, trem-like transcript 4 protein isoform 2 precursor;trem-like transcript 4 protein isoform 1 precursor;trem-like transcript 4 protein isoform 3 precursor;trem-like transcript 4 protein isoform 4 precursor	signal transduction (GO:0007165); integral component of membrane (GO:0016021)	Treml4	RefSeq	0.614718	-1.62676	1.16013	0.692844	0.0355692	Female	no_response	none
TRIM13	[TAD2800_chr14],[Plus],[Overlapping_Isoform_Count: 2]	chr14:62,218,348-62,224,782 chr14:62,217,062-62,224,782	NM_001164220 NM_023233	Tripartite motif-containing 13, E3 ubiquitin-protein ligase TRIM13	ubiquitin ligase complex (GO:0000151); ubiquitin-protein transferase activity (GO:0004842); protein binding (GO:0005515); intracellular (GO:0005622); cytoplasm (GO:0005737); cell cycle (GO:0007049); zinc ion binding (GO:0008270); integral component of membrane (GO:0016021); protein ubiquitination (GO:0016567); negative regulation of cell cycle (GO:0045786); metal ion binding (GO:0046872)	Trim13	RefSeq	0.591806	-1.68974	1.07262	0.61993	0.0175608	Female	no_response	none
TRIM24	[TAD1213_chr6],[Plus],[Overlapping_Isoform_Count: 3]	chr6:37,850,486-37,918,445 chr6:37,820,810-37,918,445	NM_145076 NM_001272064 NM_001272076	Tripartite motif-containing 24, transcription intermediary factor 1-alpha isoform 1;transcription intermediary factor 1-alpha isoform 2;transcription intermediary factor 1-alpha isoform 3	ubiquitin ligase complex (GO:0000151); DNA binding (GO:0003677); chromatin binding (GO:0003682); protein kinase activity (GO:0004672); ubiquitin-protein transferase activity (GO:0004842); protein binding (GO:0005515); intracellular (GO:0005622); nucleus (GO:0005634); nuclear euchromatin (GO:0005719); perichromatin fibrils (GO:0005726); nucleolus (GO:0005730); cytoplasm (GO:0005737); DNA-templated…	Trim24	RefSeq	0.2969	-3.36814	4.71511	1.34909	8.6236e-38	Female	no_response	none
TRIM30A	[TAD1528_chr7],[Minus]	chr7:111,557,539-111,613,707	NM_009099			Trim30a	RefSeq	0.626482	-1.59621	1.57395	0.947563	0.00713564	Female	class_I	IA
TRIM80	[TAD2365_chr11],[Plus]	chr11:115,301,858-115,309,582	NM_001033775			Trim80	RefSeq	0.406604	-2.4594	1.30306	0.516014	8.20387e-07	Female	no_response	none
TSPYL4	[TAD2019_chr10],[Plus]	chr10:34,017,226-34,021,126	NM_030203	TSPY-like 4, testis-specific Y-encoded-like protein 4	molecular_function (GO:0003674); DNA binding (GO:0003677); cellular_component (GO:0005575); nucleus (GO:0005634); nucleosome assembly (GO:0006334); biological_process (GO:0008150)	Tspyl4	RefSeq	0.438055	-2.28282	0.60403	0.25298	8.68214e-08	Female	class_I	IA
TTC21B	[TAD358_chr2],[Minus],[Overlapping_Isoform_Count: 2]	chr2:66,022,383-66,094,674	NM_001047604 NM_001290669	Tetratricopeptide repeat domain 21B, tetratricopeptide repeat protein 21B isoform a;tetratricopeptide repeat protein 21B isoform b	binding (GO:0005488); cytoplasm (GO:0005737); cytoskeleton (GO:0005856); cilium (GO:0005929); cell projection (GO:0042995)	Ttc21b	RefSeq	0.531741	-1.88062	0.711346	0.361857	1.69437e-06	Female	no_response	none
TXNDC16	[TAD2772_chr14],[Minus]	chr14:45,754,122-45,839,069	NM_172597	Thioredoxin domain containing 16, thioredoxin domain-containing protein 16 isoform 2 precursor;thioredoxin domain-containing protein 16 isoform 1 precursor	molecular_function (GO:0003674); cellular_component (GO:0005575); extracellular region (GO:0005576); obsolete electron transport (GO:0006118); biological_process (GO:0008150); arsenate reductase (thioredoxin) activity (GO:0030612); cell redox homeostasis (GO:0045454)	Txndc16	RefSeq	0.603522	-1.65694	0.900931	0.523915	0.000887619	Female	no_response	none
TYROBP	[TAD1426_chr7],[Plus]	chr7:31,198,806-31,202,598	NM_011662	TYRO protein tyrosine kinase binding protein, TYRO protein tyrosine kinase-binding protein precursor	protein binding (GO:0005515); extracellular space (GO:0005615); membrane (GO:0016020); integral component of membrane (GO:0016021); kinase activity (GO:0016301); phosphorylation (GO:0016310)	Tyrobp	RefSeq	0.638928	-1.56512	10.0991	6.20978	0.00376604	Female	no_response	none
UBA7	[TAD1941_chr9],[Plus]	chr9:107,877,897-107,886,387	NM_023738	Ubiquitin-like modifier activating enzyme 7, ubiquitin-like modifier-activating enzyme 7	ISG15 activating enzyme activity (GO:0019782); modification-dependent protein catabolic process (GO:0019941); ISG15-protein conjugation (GO:0032020)	Uba7	RefSeq	0.583735	-1.71311	3.47275	1.96305	3.43383e-06	Female	no_response	none
UGT1A1	[TAD110_chr1],[Plus],[Overlaps with:Ugt1a10;Ugt1a2;Ugt1a5;Ugt1a6a;Ugt1a6b;Ugt1a7c;Ugt1a9],[Multi-counted reads: -, -, Intron-only_counting]	chr1:90,108,533-90,116,577	NM_201645	UDP glucuronosyltransferase 1 family, polypeptide A6B, UDP-glucuronosyltransferase 1-1 precursor	endoplasmic reticulum (GO:0005783); obsolete microsome (GO:0005792); metabolic process (GO:0008152); glucuronosyltransferase activity (GO:0015020); integral component of membrane (GO:0016021); transferase activity (GO:0016740); transferase activity, transferring glycosyl groups (GO:0016757); transferase activity, transferring hexosyl groups (GO:0016758); glucuronate metabolic process (GO:0019585)	Ugt1a1	RefSeq	0.444899	-2.2477	24.9835	10.7155	1.7665e-33	Female	class_II	IIA
UGT1A5	[TAD110_chr1],[Plus],[Overlaps with:Ugt1a1;Ugt1a10;Ugt1a2;Ugt1a6a;Ugt1a6b;Ugt1a7c;Ugt1a9],[Multi-counted reads: -, -, Intron-only_counting]	chr1:90,062,586-90,116,577	NM_201643			Ugt1a5	RefSeq	0.236929	-4.22067	5.11268	1.16627	1.66297e-34	Female	no_response	none
UGT2B37	[TAD1060_chr5],[Minus]	chr5:87,669,516-87,683,813	NM_053215	UDP glucuronosyltransferase 2 family, polypeptide B37, UDP glucuronosyltransferase 2 family, polypeptide B37 precursor	molecular_function (GO:0003674); mitochondrial inner membrane (GO:0005743); endoplasmic reticulum (GO:0005783); obsolete microsome (GO:0005792); biological_process (GO:0008150); integral component of membrane (GO:0016021); transferase activity (GO:0016740); transferase activity, transferring glycosyl groups (GO:0016757)	Ugt2b37	RefSeq	0.228216	-4.38181	6.95934	1.54457	1.18372e-10	Female	class_I	IB
UTP14B	[TAD93_chr1],[Plus],[Overlapping_Isoform_Count: 2],[Overlaps with:Acsl3],[Multi-counted reads: -, -, Intron-only_counting]	chr1:78,655,014-78,664,176 chr1:78,654,399-78,664,176	NM_001001981 NM_001136226	UTP14, U3 small nucleolar ribonucleoprotein, homolog B (yeast), U3 small nucleolar RNA-associated protein 14 homolog B	spermatogenesis (GO:0007283)	Utp14b	RefSeq	0.655108	-1.52646	0.874725	0.548302	0.0112218	Female	no_response	none
VCAM1	[TAD702_chr3],[Minus]	chr3:115,812,937-115,832,606	NM_011693	Vascular cell adhesion molecule 1, vascular cell adhesion protein 1 precursor	integrin binding (GO:0005178); protein binding (GO:0005515); extracellular space (GO:0005615); plasma membrane (GO:0005886); cell adhesion (GO:0007155); heterophilic cell-cell adhesion via plasma membrane cell adhesion molecules (GO:0007157); leukocyte cell-cell adhesion (GO:0007159); heart development (GO:0007507); cell surface (GO:0009986); membrane (GO:0016020); integral component of membrane …	Vcam1	RefSeq	0.654543	-1.52778	2.49386	1.57109	0.0490758	Female	class_II	IIA
VLDLR	[TAD3452_chr19],[Plus],[Overlapping_Isoform_Count: 2]	chr19:27,291,509-27,328,721	NM_013703 NM_001161420	Very low density lipoprotein receptor, very low-density lipoprotein receptor isoform b precursor;very low-density lipoprotein receptor isoform a precursor	lipid transporter activity (GO:0005319); calcium ion binding (GO:0005509); protein binding (GO:0005515); extracellular space (GO:0005615); obsolete membrane fraction (GO:0005624); nucleus (GO:0005634); clathrin-coated pit (GO:0005905); lipid metabolic process (GO:0006629); transport (GO:0006810); lipid transport (GO:0006869); endocytosis (GO:0006897); signal transduction (GO:0007165); steroid met…	Vldlr	RefSeq	0.2567	-3.8956	1.69515	0.418227	6.41676e-32	Female	class_II	IIB
WFDC15B	[TAD513_chr2],[Minus],[Overlapping_Isoform_Count: 2]	chr2:164,040,189-164,047,399	NM_138685 NM_001045554	WAP four-disulfide core domain 15B, WAP four-disulfide core domain protein 15B precursor	molecular_function (GO:0003674); cellular_component (GO:0005575); extracellular region (GO:0005576); extracellular space (GO:0005615); biological_process (GO:0008150); negative regulation of peptidase activity (GO:0010466); peptidase inhibitor activity (GO:0030414); defense response to bacterium (GO:0042742)	Wfdc15b	RefSeq	0.140517	-7.11658	0.261173	0.0272166	0.0312272	Female	no_response	none
WFDC17	[TAD2301_chr11],[Plus]	chr11:83,517,557-83,519,771	NM_001081957			Wfdc17	RefSeq	0.618645	-1.61644	12.4943	7.46226	0.0103651	Female	no_response	none
WFDC2	[TAD514_chr2],[Plus]	chr2:164,388,215-164,394,006	NM_026323	WAP four-disulfide core domain 2, WAP four-disulfide core domain protein 2 precursor	molecular_function (GO:0003674); endopeptidase inhibitor activity (GO:0004866); serine-type endopeptidase inhibitor activity (GO:0004867); cellular_component (GO:0005575); extracellular region (GO:0005576); extracellular space (GO:0005615); biological_process (GO:0008150); negative regulation of peptidase activity (GO:0010466); negative regulation of endopeptidase activity (GO:0010951); peptidase…	Wfdc2	RefSeq	0.633136	-1.57944	3.32658	2.05676	0.0106068	Female	no_response	none
XIST	[TAD3566_chrX],[Minus],[Overlapping_Isoform_Count: 2]	chrX:100,655,711-100,678,572	NR_001463 NR_001570	Inactive X specific transcripts,	chromosome (GO:0005694); dosage compensation by inactivation of X chromosome (GO:0009048)	Xist	RefSeq	0.000931573	-1073.45	22.4781	0.0198651	0	Female	no_response	none
ZAP70	[TAD30_chr1],[Plus],[Overlapping_Isoform_Count: 4]	chr1:36,818,642-36,839,665 chr1:36,821,359-36,839,665 chr1:36,823,778-36,839,665 chr1:36,835,828-36,839,665	NM_009539 NM_001289612 NM_001289765 NM_001289766	Zeta-chain (TCR) associated protein kinase, tyrosine-protein kinase ZAP-70 TZK;tyrosine-protein kinase ZAP-70 isoform a;tyrosine-protein kinase ZAP-70 isoform b	nucleotide binding (GO:0000166); immunological synapse (GO:0001772); phosphotyrosine residue binding (GO:0001784); protein kinase activity (GO:0004672); protein tyrosine kinase activity (GO:0004713); non-membrane spanning protein tyrosine kinase activity (GO:0004715); protein binding (GO:0005515); ATP binding (GO:0005524); cytoplasm (GO:0005737); cytosol (GO:0005829); plasma membrane (GO:0005886)…	Zap70	RefSeq	0.459601	-2.1758	1.66549	0.745226	2.24823e-08	Female	class_I	IA
ZBP1	[TAD535_chr2],[Minus],[Overlapping_Isoform_Count: 2]	chr2:173,032,113-173,044,423 chr2:173,039,236-173,044,423	NM_001139519 NM_021394	Z-DNA binding protein 1, Z-DNA-binding protein 1 isoform 2;Z-DNA-binding protein 1 isoform 1	DNA binding (GO:0003677); left-handed Z-DNA binding (GO:0003692); RNA binding (GO:0003723); double-stranded RNA adenosine deaminase activity (GO:0003726); cellular_component (GO:0005575); biological_process (GO:0008150)	Zbp1	RefSeq	0.479695	-2.08466	2.92819	1.35356	0.000357786	Female	class_I	IA
ZC2HC1A	[TAD547_chr3],[Plus]	chr3:7,503,425-7,553,848	NM_173181			Zc2hc1a	RefSeq	0.488923	-2.04531	0.42982	0.202974	0.00024224	Female	no_response	none
ZC3H12D	[TAD1973_chr10],[Plus],[Overlaps with:Mir5104]	chr10:7,552,267-7,590,195	NM_172785	Zinc finger CCCH type containing 12D, probable ribonuclease ZC3H12D	molecular_function (GO:0003674); nucleic acid binding (GO:0003676); nuclease activity (GO:0004518); endonuclease activity (GO:0004519); cellular_component (GO:0005575); biological_process (GO:0008150); zinc ion binding (GO:0008270); hydrolase activity (GO:0016787); metal ion binding (GO:0046872)	Zc3h12d	RefSeq	0.493544	-2.02616	0.260986	0.124788	0.00561076	Female	class_II	IIA
ZFP292	[TAD792_chr4],[Minus]	chr4:34,750,358-34,830,197	NM_013889	Zinc finger protein 292, zinc finger protein 292	molecular_function (GO:0003674); DNA binding (GO:0003677); cellular_component (GO:0005575); intracellular (GO:0005622); nucleus (GO:0005634); biological_process (GO:0008150); zinc ion binding (GO:0008270); obsolete transcription activator activity (GO:0016563); metal ion binding (GO:0046872)	Zfp292	RefSeq	0.532084	-1.8794	1.96263	1.00314	2.29737e-15	Female	no_response	none
ZFP36L1	[TAD2477_chr12],[Minus]	chr12:81,208,746-81,214,000	NM_007564	Zinc finger protein 36, C3H type-like 1, zinc finger protein 36, C3H1 type-like 1	nuclear-transcribed mRNA catabolic process, deadenylation-dependent decay (GO:0000288); vasculogenesis (GO:0001570); nucleic acid binding (GO:0003676); DNA binding (GO:0003677); mRNA binding (GO:0003729); nucleus (GO:0005634); cytoplasm (GO:0005737); cytosol (GO:0005829); mRNA catabolic process (GO:0006402); regulation of translation (GO:0006417); zinc ion binding (GO:0008270); AU-rich element bi…	Zfp36l1	RefSeq	0.657734	-1.52037	39.8792	25.2648	0.0208247	Female	no_response	none
ZFP429	[TAD2642_chr13],[Minus]	chr13:67,490,264-67,500,703	NM_001080941	Zinc finger protein 429, zinc finger protein 429	molecular_function (GO:0003674); cellular_component (GO:0005575); biological_process (GO:0008150); metal ion binding (GO:0046872)	Zfp429	RefSeq	0.585137	-1.709	0.633745	0.352613	0.0424574	Female	no_response	none
ZFP820	[TAD3166_chr17],[Minus]	chr17:21,953,842-21,982,726	NM_029281	Zinc finger protein 820, zinc finger protein 820	molecular_function (GO:0003674); cellular_component (GO:0005575); nucleus (GO:0005634); biological_process (GO:0008150)	Zfp820	RefSeq	0.654724	-1.52736	0.736332	0.458901	0.00606743	Female	no_response	none
ZFP947	[TAD3167_chr17],[Minus]	chr17:22,281,325-22,302,944	NM_177596			Zfp947	RefSeq	0.573482	-1.74373	0.483541	0.266473	0.018818	Female	no_response	none
ZFP960	[TAD3163_chr17],[Plus],[Overlapping_Isoform_Count: 2]	chr17:17,201,066-17,226,595	NM_001005358 NM_001163919			Zfp960	RefSeq	0.595633	-1.67889	0.658555	0.378992	0.00626213	Female	no_response	none
1700024P16RIK	[TAD886_chr4],[Plus],[Overlapping_Isoform_Count: 4]	chr4:104,586,060-104,689,468	NM_001162980 NM_001285952 NM_001285953 NR_104376	RIKEN cDNA 1700024P16 gene, uncharacterized protein C1orf168 homolog isoform a;uncharacterized protein C1orf168 homolog isoform b;uncharacterized protein C1orf168 homolog isoform c	molecular_function (GO:0003674); cellular_component (GO:0005575); biological_process (GO:0008150)	1700024P16Rik	RefSeq	1.87283	1.87283	1.18765	2.12034	4.86428e-07	Male	no_response	none
1700028E10RIK	[TAD1167_chr5],[Plus],[Overlapping_Isoform_Count: 2]	chr5:152,171,249-152,216,658 chr5:152,171,249-152,198,739	NR_045700 NR_045699	RIKEN cDNA 1700028E10 gene,	molecular_function (GO:0003674); cellular_component (GO:0005575); biological_process (GO:0008150)	1700028E10Rik	RefSeq	1.90977	1.90977	0.254843	0.470456	0.00464196	Male	class_II	IIA
1810055G02RIK	[TAD3407_chr19],[Plus]	chr19:3,708,332-3,717,881	NM_028077	RIKEN cDNA 1810055G02 gene, uncharacterized protein C11orf24 homolog precursor	molecular_function (GO:0003674); cellular_component (GO:0005575); extracellular space (GO:0005615); biological_process (GO:0008150); membrane (GO:0016020); integral component of membrane (GO:0016021)	1810055G02Rik	RefSeq	1.74654	1.74654	3.16106	5.34527	1.57243e-07	Male	class_I	IA
1810064F22RIK	[TAD1783_chr9],[Minus]	chr9:22,011,229-22,018,304	NR_027981	RIKEN cDNA 1810064F22 gene,	molecular_function (GO:0003674); cellular_component (GO:0005575); biological_process (GO:0008150)	1810064F22Rik	RefSeq	2.28416	2.28416	2.22094	4.93024	2.42318e-09	Male	no_response	none
2010003K11RIK	[TAD3409_chr19],[Minus]	chr19:4,496,787-4,498,583	NM_027237	RIKEN cDNA 2010003K11 gene, uncharacterized protein C11orf86 homolog	molecular_function (GO:0003674); cellular_component (GO:0005575); biological_process (GO:0008150)	2010003K11Rik	RefSeq	3.19303	3.19303	1.81421	5.55449	1.55318e-19	Male	class_II	IIA
2200002D01RIK	[TAD1423_chr7],[Minus]	chr7:30,032,539-30,033,486	NM_028179	RIKEN cDNA 2200002D01 gene, immortalization up-regulated protein	molecular_function (GO:0003674); nucleolus (GO:0005730); biological_process (GO:0008150)	2200002D01Rik	RefSeq	2.2583	2.2583	2.1792	4.75039	4.02592e-06	Male	no_response	none
2810408I11RIK	[TAD74_chr1],[Minus]	chr1:64,726,442-64,737,233	NR_038009	RIKEN cDNA 2810408I11 gene,	molecular_function (GO:0003674); cellular_component (GO:0005575); biological_process (GO:0008150)	2810408I11Rik	RefSeq	2.31855	2.31855	0.361648	0.808017	0.0151766	Male	no_response	none
3110082I17RIK	[TAD1140_chr5],[Minus],[Overlaps with:Mir339]	chr5:139,835,692-139,936,488	NM_028469	RIKEN cDNA 3110082I17 gene, uncharacterized protein C7orf50 homolog	molecular_function (GO:0003674); cellular_component (GO:0005575); biological_process (GO:0008150)	3110082I17Rik	RefSeq	2.18725	2.18725	1.46819	3.13579	2.01665e-07	Male	no_response	none
4833411C07RIK	[TAD1606_chr8],[Plus]	chr8:10,899,921-10,902,334	NR_102285	RIKEN cDNA 4833411C07 gene,	molecular_function (GO:0003674); cellular_component (GO:0005575); biological_process (GO:0008150)	4833411C07Rik	RefSeq	2.12767	2.12767	2.10032	4.35616	2.68536e-11	Male	class_II	IIA
4930480G23RIK	[TAD785_chr4],[Minus]	chr4:19,906,591-19,932,886	NR_040768	RIKEN cDNA 4930480G23 gene,	molecular_function (GO:0003674); cellular_component (GO:0005575); biological_process (GO:0008150)	4930480G23Rik	RefSeq	1.96622	1.96622	0.26967	0.52617	0.0332393	Male	no_response	none
5033406O09RIK	[TAD2524_chr12],[Minus]	chr12:113,180,201-113,182,693	NR_029464	RIKEN cDNA 5033406O09 gene,	molecular_function (GO:0003674); cellular_component (GO:0005575); biological_process (GO:0008150)	5033406O09Rik	RefSeq	1.50564	1.50564	1.01552	1.50502	0.0333139	Male	class_I	IA
9130409I23RIK	[TAD241_chr1],[Plus]	chr1:182,981,367-182,990,798	NM_001033819	RIKEN cDNA 9130409I23 gene, uncharacterized protein LOC619326	molecular_function (GO:0003674); cellular_component (GO:0005575); biological_process (GO:0008150)	9130409I23Rik	RefSeq	1.57255	1.57255	18.6405	28.2333	1.74198e-06	Male	class_I	IA
A2M	[TAD1352_chr6],[Plus]	chr6:121,586,190-121,629,256	NM_175628	Alpha-2-macroglobulin, alpha-2-macroglobulin-P precursor	endopeptidase inhibitor activity (GO:0004866); serine-type endopeptidase inhibitor activity (GO:0004867); protein binding (GO:0005515); extracellular region (GO:0005576); extracellular space (GO:0005615); female pregnancy (GO:0007565); negative regulation of peptidase activity (GO:0010466); negative regulation of endopeptidase activity (GO:0010951); peptidase inhibitor activity (GO:0030414)	A2m	RefSeq	10.0878	10.0878	0.0425385	0.417373	2.40198e-09	Male	class_I	IA
AADAT	[TAD1664_chr8],[Plus]	chr8:62,984,920-63,024,474	NM_011834	Aminoadipate aminotransferase, kynurenine/alpha-aminoadipate aminotransferase, mitochondrial	catalytic activity (GO:0003824); mitochondrion (GO:0005739); transaminase activity (GO:0008483); biosynthetic process (GO:0009058); kynurenine-oxoglutarate transaminase activity (GO:0016212); transferase activity (GO:0016740); transferase activity, transferring nitrogenous groups (GO:0016769); tryptophan catabolic process to kynurenine (GO:0019441); pyridoxal phosphate binding (GO:0030170); 2-ami…	Aadat	RefSeq	1.72166	1.72166	21.8113	36.2515	5.02843e-13	Male	no_response	none
ABCB10	[TAD1757_chr8],[Minus]	chr8:126,476,358-126,507,022	NM_019552	ATP-binding cassette, sub-family B (MDR/TAP), member 10, ATP-binding cassette sub-family B member 10, mitochondrial precursor	nucleotide binding (GO:0000166); transporter activity (GO:0005215); ATP binding (GO:0005524); mitochondrion (GO:0005739); mitochondrial inner membrane (GO:0005743); obsolete ATP catabolic process (GO:0006200); transport (GO:0006810); membrane (GO:0016020); integral component of membrane (GO:0016021); ATPase activity (GO:0016887); nucleoside-triphosphatase activity (GO:0017111); organelle inner me…	Abcb10	RefSeq	1.70954	1.70954	3.88624	6.40116	2.84694e-12	Male	no_response	none
ABCG2	[TAD1254_chr6],[Plus]	chr6:58,546,665-58,642,445	NM_011920	ATP-binding cassette, sub-family G (WHITE), member 2, ATP-binding cassette sub-family G member 2	nucleotide binding (GO:0000166); ATP binding (GO:0005524); plasma membrane (GO:0005886); obsolete ATP catabolic process (GO:0006200); transport (GO:0006810); drug transmembrane transporter activity (GO:0015238); drug transport (GO:0015893); membrane (GO:0016020); integral component of membrane (GO:0016021); apical plasma membrane (GO:0016324); ATPase activity (GO:0016887); nucleoside-triphosphata…	Abcg2	RefSeq	2.34587	2.34587	7.3279	16.5912	8.40117e-34	Male	no_response	none
ABHD17B	[TAD3441_chr19],[Plus]	chr19:21,727,798-21,760,127	NM_146096			Abhd17b	RefSeq	1.58333	1.58333	3.63448	5.54128	1.49789e-06	Male	no_response	none
ABHD5	[TAD1967_chr9],[Plus]	chr9:122,260,733-122,290,641	NM_026179	Abhydrolase domain containing 5, 1-acylglycerol-3-phosphate O-acyltransferase ABHD5	1-acylglycerol-3-phosphate O-acyltransferase activity (GO:0003841); aminopeptidase activity (GO:0004177); triglyceride lipase activity (GO:0004806); protein binding (GO:0005515); cytoplasm (GO:0005737); lipid droplet (GO:0005811); cytosol (GO:0005829); lipid metabolic process (GO:0006629); fatty acid metabolic process (GO:0006631); peptidase activity (GO:0008233); phospholipid biosynthetic proces…	Abhd5	RefSeq	1.6559	1.6559	4.52627	7.25015	3.39758e-08	Male	no_response	none
ACSF2	[TAD2324_chr11],[Minus]	chr11:94,418,415-94,463,100	NM_153807	Acyl-CoA synthetase family member 2, acyl-CoA synthetase family member 2, mitochondrial precursor	nucleotide binding (GO:0000166); molecular_function (GO:0003674); catalytic activity (GO:0003824); ATP binding (GO:0005524); mitochondrion (GO:0005739); lipid metabolic process (GO:0006629); fatty acid metabolic process (GO:0006631); biological_process (GO:0008150); metabolic process (GO:0008152); integral component of membrane (GO:0016021); ligase activity (GO:0016874)	Acsf2	RefSeq	1.50094	1.50094	20.1059	29.1014	8.04883e-08	Male	class_I	IA
ACSM2	[TAD1553_chr7],[Plus],[Overlapping_Isoform_Count: 3]	chr7:126,705,221-126,744,208 chr7:126,697,853-126,744,208	NM_146197 NM_001177977 NM_001177978	Acyl-CoA synthetase medium-chain family member 2, acyl-coenzyme A synthetase ACSM2, mitochondrial isoform 3;acyl-coenzyme A synthetase ACSM2, mitochondrial isoform 1;acyl-coenzyme A synthetase ACSM2, mitochondrial isoform 2	nucleotide binding (GO:0000166); molecular_function (GO:0003674); catalytic activity (GO:0003824); ATP binding (GO:0005524); cellular_component (GO:0005575); mitochondrion (GO:0005739); lipid metabolic process (GO:0006629); fatty acid metabolic process (GO:0006631); biological_process (GO:0008150); metabolic process (GO:0008152); ligase activity (GO:0016874); metal ion binding (GO:0046872); butyr…	Acsm2	RefSeq	1.7804	1.7804	0.412848	0.714855	0.00817436	Male	class_I	IB
ADAMTSL2	[TAD305_chr2],[Plus]	chr2:26,934,900-26,964,133	NM_029981	ADAMTS-like 2, ADAMTS-like protein 2 precursor	molecular_function (GO:0003674); metalloendopeptidase activity (GO:0004222); cellular_component (GO:0005575); extracellular region (GO:0005576); (GO:0005578); biological_process (GO:0008150); peptidase activity (GO:0008233); metallopeptidase activity (GO:0008237); zinc ion binding (GO:0008270); extracellular matrix (GO:0031012)	Adamtsl2	RefSeq	1.50295	1.50295	0.51156	0.725849	0.0453356	Male	class_I	IB
ADARB2	[TAD2541_chr13],[Plus],[Overlapping_Isoform_Count: 3]	chr13:8,202,111-8,768,008 chr13:8,202,111-8,759,688	NM_052977 NM_001289530 NR_110345	Adenosine deaminase, RNA-specific, B2, double-stranded RNA-specific editase B2 isoform 2;double-stranded RNA-specific editase B2 isoform 1	RNA binding (GO:0003723); double-stranded RNA binding (GO:0003725); adenosine deaminase activity (GO:0004000); intracellular (GO:0005622); nucleus (GO:0005634); RNA processing (GO:0006396); mRNA processing (GO:0006397); hydrolase activity (GO:0016787); metal ion binding (GO:0046872)	Adarb2	RefSeq	4.74806	4.74806	0.0818122	0.379323	5.79948e-18	Male	class_II	IIA
ADH6-PS1	[TAD740_chr3],[Plus]	chr3:138,037,084-138,051,255	NR_033581			Adh6-ps1	RefSeq	10.9178	10.9178	0.0769988	0.791274	2.38165e-31	Male	class_I	IB
ADORA1	[TAD157_chr1],[Minus],[Overlapping_Isoform_Count: 5]	chr1:136,095,791-136,131,433 chr1:136,095,791-136,132,034	NM_001039510 NM_001008533 NM_001282945 NM_001291928 NM_001291930	Adenosine A1 receptor, adenosine receptor A1 isoform a;adenosine receptor A1 isoform c;adenosine receptor A1 isoform b	activation of MAPKK activity (GO:0000186); obsolete rhodopsin-like receptor activity (GO:0001584); G-protein coupled adenosine receptor activity (GO:0001609); temperature homeostasis (GO:0001659); purine nucleoside binding (GO:0001883); regulation of respiratory gaseous exchange by neurological system process (GO:0002087); negative regulation of leukocyte migration (GO:0002686); positive regulati…	Adora1	RefSeq	2.21387	2.21387	1.20829	2.58477	6.88289e-20	Male	class_II	IIA
ADRB3	[TAD1624_chr8],[Minus]	chr8:28,336,247-28,340,060	NM_013462	Adrenergic receptor, beta 3, beta-3 adrenergic receptor	obsolete rhodopsin-like receptor activity (GO:0001584); diet induced thermogenesis (GO:0002024); norepinephrine-epinephrine-mediated vasodilation involved in regulation of systemic arterial blood pressure (GO:0002025); signal transducer activity (GO:0004871); G-protein coupled receptor activity (GO:0004930); adrenergic receptor activity (GO:0004935); beta-adrenergic receptor activity (GO:0004939)…	Adrb3	RefSeq	1.67812	1.67812	1.17371	1.92269	0.0102608	Male	class_II	IIB
AK4	[TAD879_chr4],[Plus],[Overlapping_Isoform_Count: 4]	chr4:101,092,307-101,140,376 chr4:101,091,916-101,140,376 chr4:101,091,925-101,140,376 chr4:101,091,893-101,140,376	NM_001177602 NM_009647 NM_001177605 NM_001177604	adenylate kinase 4, adenylate kinase 4, mitochondrial	mitochondrion (GO:0005739)	Ak4	RefSeq	1.62592	1.62592	5.15517	8.08158	2.04903e-10	Male	class_II	IIB
ALAS2	[TAD3596_chrX],[Plus],[Overlapping_Isoform_Count: 2]	chrX:146,981,959-147,005,165	NM_009653 NM_001102446	Aminolevulinic acid synthase 2, erythroid, 5-aminolevulinate synthase, erythroid-specific, mitochondrial isoform b;5-aminolevulinate synthase, erythroid-specific, mitochondrial isoform a	catalytic activity (GO:0003824); 5-aminolevulinate synthase activity (GO:0003870); protein binding (GO:0005515); extracellular space (GO:0005615); mitochondrion (GO:0005739); heme biosynthetic process (GO:0006783); cellular iron ion homeostasis (GO:0006879); metabolic process (GO:0008152); biosynthetic process (GO:0009058); glycine binding (GO:0016594); transferase activity (GO:0016740); transfer…	Alas2	RefSeq	5.36431	5.36431	7.27436	37.8179	5.2624e-68	Male	class_II	IIA
ALDOC	[TAD2286_chr11],[Plus],[Overlapping_Isoform_Count: 2]	chr11:78,137,699-78,141,280 chr11:78,136,574-78,141,280	NM_009657 NM_001303423	aldolase C, fructose-bisphosphate, fructose-bisphosphate aldolase C	fructose-bisphosphate aldolase activity (GO:0004332); mitochondrion (GO:0005739); glycolytic process (GO:0006096); lyase activity (GO:0016829)	Aldoc	RefSeq	1.75248	1.75248	1.63954	2.78356	1.46244e-08	Male	class_II	IIA
ALPL	[TAD951_chr4],[Minus],[Overlapping_Isoform_Count: 3]	chr4:137,297,645-137,352,299 chr4:137,297,645-137,325,735 chr4:137,297,645-137,322,390	NM_007431 NM_001287172 NM_001287176	Alkaline phosphatase, liver/bone/kidney, alkaline phosphatase, tissue-nonspecific isozyme preproprotein	magnesium ion binding (GO:0000287); catalytic activity (GO:0003824); alkaline phosphatase activity (GO:0004035); extracellular space (GO:0005615); plasma membrane (GO:0005886); metabolic process (GO:0008152); membrane (GO:0016020); dephosphorylation (GO:0016311); hydrolase activity (GO:0016787); phosphatase activity (GO:0016791); anchored component of membrane (GO:0031225); response to antibiotic…	Alpl	RefSeq	1.9772	1.9772	1.0865	2.06911	7.31267e-09	Male	class_II	IIA
AOX1	[TAD62_chr1],[Plus]	chr1:58,086,812-58,163,254	NM_009676	Aldehyde oxidase 1, aldehyde oxidase 1	catalytic activity (GO:0003824); aldehyde oxidase activity (GO:0004031); obsolete electron transporter activity (GO:0005489); iron ion binding (GO:0005506); cytoplasm (GO:0005737); obsolete electron transport (GO:0006118); electron transfer activity (GO:0009055); oxidoreductase activity (GO:0016491); molybdenum ion binding (GO:0030151); metal ion binding (GO:0046872); flavin adenine dinucleotide …	Aox1	RefSeq	2.56573	2.56573	6.35705	15.7344	3.89543e-19	Male	no_response	none
AOX3	[TAD62_chr1],[Plus]	chr1:58,169,979-58,257,296	NM_023617	Aldehyde oxidase 3, aldehyde oxidase 3	aldehyde oxidase activity (GO:0004031); cellular_component (GO:0005575); obsolete electron transport (GO:0006118); biological_process (GO:0008150); electron transfer activity (GO:0009055); oxidoreductase activity (GO:0016491); molybdenum ion binding (GO:0030151); metal ion binding (GO:0046872); iron-sulfur cluster binding (GO:0051536); 2 iron, 2 sulfur cluster binding (GO:0051537)	Aox3	RefSeq	5.31553	5.31553	33.0026	169.161	2.84295e-97	Male	class_I	IA
APOA1	[TAD1825_chr9],[Plus]	chr9:46,036,712-46,038,552	NM_009692	Apolipoprotein A-I, apolipoprotein A-I preproprotein	regulation of protein phosphorylation (GO:0001932); endothelial cell proliferation (GO:0001935); enzyme inhibitor activity (GO:0004857); lipid transporter activity (GO:0005319); protein binding (GO:0005515); phospholipid transporter activity (GO:0005548); extracellular region (GO:0005576); extracellular space (GO:0005615); nucleus (GO:0005634); lipid metabolic process (GO:0006629); phospholipid m…	Apoa1	RefSeq	1.60588	1.60589	1990.92	3081.25	2.85324e-13	Male	class_I	IA
APOC2	[TAD1420_chr7],[Minus]	chr7:20,256,927-20,263,290	NM_001277944	Apolipoprotein C-II, apolipoprotein C-II precursor	molecular_function (GO:0003674); lipid transporter activity (GO:0005319); cellular_component (GO:0005575); extracellular region (GO:0005576); lipid metabolic process (GO:0006629); transport (GO:0006810); lipid transport (GO:0006869); enzyme activator activity (GO:0008047); biological_process (GO:0008150); lipid catabolic process (GO:0016042); very-low-density lipoprotein particle (GO:0034361); ch…	Apoc2	RefSeq	1.64468	1.64468	66.0221	104.667	9.88329e-10	Male	no_response	none
APOL10A	[TAD2965_chr15],[Plus]	chr15:77,307,476-77,321,499	NM_177744	apolipoprotein L 10a, apolipoprotein L 10a	molecular_function (GO:0003674); cellular_component (GO:0005575); biological_process (GO:0008150)	Apol10a	RefSeq	1.76515	1.76515	0.977566	1.66043	0.00286799	Male	class_I	IB
AQP4	[TAD3289_chr18],[Minus]	chr18:15,547,902-15,562,193	NM_009700	Aquaporin 4, aquaporin-4 isoform M1x;aquaporin-4 isoform M1;aquaporin-4 isoform M23	transporter activity (GO:0005215); cytoplasm (GO:0005737); plasma membrane (GO:0005886); integral component of plasma membrane (GO:0005887); cell-cell junction (GO:0005911); transport (GO:0006810); water transport (GO:0006833); sensory perception of sound (GO:0007605); water channel activity (GO:0015250); porin activity (GO:0015288); carbon dioxide transport (GO:0015670); membrane (GO:0016020); i…	Aqp4	RefSeq	1.92145	1.92145	0.230363	0.435839	0.00426398	Male	class_II	IIA
ARHGAP44	[TAD2260_chr11],[Minus],[Overlapping_Isoform_Count: 2]	chr11:64,815,540-64,976,463	NM_001099288 NM_175003			Arhgap44	RefSeq	1.91237	1.91237	0.225932	0.422515	0.00023318	Male	no_response	none
ARL6IP1	[TAD1549_chr7],[Minus]	chr7:125,262,403-125,273,139	NM_019419	ADP-ribosylation factor-like 6 interacting protein 1, ADP-ribosylation factor-like protein 6-interacting protein 1	protein binding (GO:0005515); cytoplasm (GO:0005737); endoplasmic reticulum (GO:0005783); Sec61 translocon complex (GO:0005784); cytosol (GO:0005829); cotranslational protein targeting to membrane (GO:0006613); membrane (GO:0016020); integral component of membrane (GO:0016021)	Arl6ip1	RefSeq	1.57016	1.57016	27.8057	42.0823	1.18532e-11	Male	no_response	none
ARSA	[TAD2982_chr15],[Minus]	chr15:89,302,906-89,307,855	NM_009713	Arylsulfatase A, arylsulfatase A precursor	magnesium ion binding (GO:0000287); obsolete integral to membrane of membrane fraction (GO:0000299); acrosomal vesicle (GO:0001669); catalytic activity (GO:0003824); arylsulfatase activity (GO:0004065); cerebroside-sulfatase activity (GO:0004098); hormone activity (GO:0005179); extracellular region (GO:0005576); extracellular space (GO:0005615); cytoplasm (GO:0005737); lysosome (GO:0005764); endo…	Arsa	RefSeq	2.33799	2.33799	2.1459	4.85161	4.93434e-27	Male	no_response	none
ARSG	[TAD2353_chr11],[Plus],[Overlapping_Isoform_Count: 2]	chr11:109,334,687-109,434,643 chr11:109,405,024-109,434,643	NM_028710 NM_001166177	Arylsulfatase G, arylsulfatase G isoform 2;arylsulfatase G isoform 1 precursor	molecular_function (GO:0003674); catalytic activity (GO:0003824); cellular_component (GO:0005575); lysosome (GO:0005764); endoplasmic reticulum (GO:0005783); biological_process (GO:0008150); metabolic process (GO:0008152); sulfuric ester hydrolase activity (GO:0008484); hydrolase activity (GO:0016787); metal ion binding (GO:0046872)	Arsg	RefSeq	1.56136	1.56136	2.34419	3.5434	2.14985e-07	Male	class_I	IA
ASNS	[TAD1175_chr6],[Minus]	chr6:7,625,170-7,643,182	NM_012055	Asparagine synthetase, asparagine synthetase [glutamine-hydrolyzing]	nucleotide binding (GO:0000166); asparagine synthase (glutamine-hydrolyzing) activity (GO:0004066); ATP binding (GO:0005524); obsolete soluble fraction (GO:0005625); asparagine biosynthetic process (GO:0006529); glutamine metabolic process (GO:0006541); metabolic process (GO:0008152); cellular amino acid biosynthetic process (GO:0008652); ligase activity (GO:0016874); protein homodimerization act…	Asns	RefSeq	9.27555	9.27555	0.108033	0.994273	1.24945e-26	Male	class_I	IA
ATG16L2	[TAD1520_chr7],[Minus]	chr7:108,438,129-108,450,602	NM_001111111	Autophagy related 16 like 2 (S. cerevisiae), autophagy-related protein 16-2	molecular_function (GO:0003674); cellular_component (GO:0005575); cytoplasm (GO:0005737); transport (GO:0006810); autophagy (GO:0006914); biological_process (GO:0008150); protein transport (GO:0015031)	Atg16l2	RefSeq	1.84911	1.84911	1.45132	2.57017	6.51834e-07	Male	class_II	IIA
ATP8B4	[TAD445_chr2],[Minus]	chr2:126,146,708-126,317,289	NM_001080944	ATPase, class I, type 8B, member 4, probable phospholipid-transporting ATPase IM	nucleotide binding (GO:0000166); magnesium ion binding (GO:0000287); molecular_function (GO:0003674); ATP binding (GO:0005524); cellular_component (GO:0005575); biological_process (GO:0008150); membrane (GO:0016020); integral component of membrane (GO:0016021); hydrolase activity (GO:0016787)	Atp8b4	RefSeq	2.11264	2.11264	0.13424	0.267612	0.000276756	Male	class_I	IA
B3GALT1	[TAD360_chr2],[Plus]	chr2:67,942,728-67,960,939	NM_020283	UDP-Gal:betaGlcNAc beta 1,3-galactosyltransferase, polypeptide 1, beta-1,3-galactosyltransferase 1	Golgi membrane (GO:0000139); extracellular space (GO:0005615); Golgi apparatus (GO:0005794); protein glycosylation (GO:0006486); galactosyltransferase activity (GO:0008378); UDP-galactose:beta-N-acetylglucosamine beta-1,3-galactosyltransferase activity (GO:0008499); oligosaccharide biosynthetic process (GO:0009312); membrane (GO:0016020); integral component of membrane (GO:0016021); transferase a…	B3galt1	RefSeq	2.61114	2.61114	3.60302	9.08329	9.83928e-36	Male	class_I	IA
B4GALNT3	[TAD1347_chr6],[Minus]	chr6:120,153,827-120,244,577	NM_198884	Beta-1,4-N-acetyl-galactosaminyl transferase 3, beta-1,4-N-acetylgalactosaminyltransferase 3	Golgi apparatus (GO:0005794); acetylgalactosaminyltransferase activity (GO:0008376); membrane (GO:0016020); integral component of membrane (GO:0016021); transferase activity (GO:0016740); transferase activity, transferring hexosyl groups (GO:0016758); Golgi cisterna membrane (GO:0032580); N-acetyl-beta-glucosaminyl-glycoprotein 4-beta-N-acetylgalactosaminyltransferase activity (GO:0033842)	B4galnt3	RefSeq	3.09454	3.09454	0.147273	0.440119	3.13637e-06	Male	class_I	IA
B930025P03RIK	[TAD1606_chr8],[Minus]	chr8:10,870,421-10,882,454	NR_040705	RIKEN cDNA B930025P03 gene,	molecular_function (GO:0003674); cellular_component (GO:0005575); biological_process (GO:0008150)	B930025P03Rik	RefSeq	2.29544	2.29544	0.20269	0.445772	0.000919955	Male	class_II	IIB
BC021767	[TAD662_chr3],[Minus]	chr3:94,464,510-94,471,074	NR_033629	cingulin-like,		BC021767	RefSeq	1.54668	1.54668	0.722262	1.06853	0.0272296	Male	class_I	IA
BC048546	[TAD1364_chr6],[Minus]	chr6:128,489,839-128,531,624	NM_001001179	CDNA sequence BC048546, ovostatin homolog precursor	molecular_function (GO:0003674); endopeptidase inhibitor activity (GO:0004866); serine-type endopeptidase inhibitor activity (GO:0004867); protein binding (GO:0005515); cellular_component (GO:0005575); extracellular region (GO:0005576); extracellular space (GO:0005615); biological_process (GO:0008150); negative regulation of peptidase activity (GO:0010466); negative regulation of endopeptidase ac…	BC048546	RefSeq	1.97711	1.97711	0.941949	1.79678	2.69098e-10	Male	class_II	IIA
BCL6	[TAD3044_chr16],[Minus]	chr16:23,965,137-23,988,698	NM_009744	B-cell leukemia/lymphoma 6, B-cell lymphoma 6 protein homolog	negative regulation of transcription by RNA polymerase II (GO:0000122); cell morphogenesis (GO:0000902); negative regulation of cell-matrix adhesion (GO:0001953); germinal center formation (GO:0002467); negative regulation of type 2 immune response (GO:0002829); nucleic acid binding (GO:0003676); DNA binding (GO:0003677); chromatin binding (GO:0003682); protein binding (GO:0005515); intracellular…	Bcl6	RefSeq	1.81862	1.81862	2.56711	4.46584	0.00176298	Male	class_II	IIA
BIK	[TAD2975_chr15],[Plus]	chr15:83,357,291-83,375,065	NM_007546	Bcl2-interacting killer, bcl-2-interacting killer	protein binding (GO:0005515); mitochondrial envelope (GO:0005740); spermatogenesis (GO:0007283); male gonad development (GO:0008584); protein heterodimerization activity (GO:0046982); BH domain binding (GO:0051400)	Bik	RefSeq	2.08608	2.08608	1.37029	2.75841	5.4516e-06	Male	no_response	none
BMP4	[TAD2773_chr14],[Minus]	chr14:47,003,195-47,010,274	NM_007554	Bone morphogenetic protein 4, bone morphogenetic protein 4 preproprotein	skeletal system development (GO:0001501); ossification (GO:0001503); angiogenesis (GO:0001525); ovarian follicle development (GO:0001541); blood vessel development (GO:0001568); osteoblast differentiation (GO:0001649); eye development (GO:0001654); metanephros development (GO:0001656); ureteric bud development (GO:0001657); branching involved in ureteric bud morphogenesis (GO:0001658); mesoderm f…	Bmp4	RefSeq	2.03366	2.03366	0.719015	1.42605	2.60472e-07	Male	class_II	IIA
BMYC	[TAD303_chr2],[Plus]	chr2:25,562,398-25,563,239	NM_023326	Brain expressed myelocytomatosis oncogene, protein B-Myc	DNA binding (GO:0003677); DNA binding transcription factor activity (GO:0003700); protein binding (GO:0005515); nucleus (GO:0005634); spindle (GO:0005819); regulation of transcription, DNA-templated (GO:0006355)	Bmyc	RefSeq	1.93008	1.93008	1.33659	2.51129	3.28281e-05	Male	no_response	none
BOK	[TAD121_chr1],[Plus]	chr1:95,582,270-95,592,339	NM_016778	BCL2-related ovarian killer protein, bcl-2-related ovarian killer protein	cellular_component (GO:0005575); apoptotic process (GO:0006915); regulation of apoptotic process (GO:0042981); positive regulation of apoptotic process (GO:0043065); protein heterodimerization activity (GO:0046982); protein dimerization activity (GO:0046983); BH domain binding (GO:0051400)	Bok	RefSeq	2.04876	2.04876	1.92743	3.82533	1.72568e-10	Male	no_response	none
C4A	[TAD3195_chr17],[Minus]	chr17:34,946,036-34,960,399	NM_011413	Complement component 4B (Childo blood group), sex-limited protein precursor	inflammatory response (GO:0006954); immune response (GO:0006955); complement activation (GO:0006956); complement activation, classical pathway (GO:0006958); immunoglobulin mediated immune response (GO:0016064)	C4a	RefSeq	9.90014	9.90014	2.01318	19.286	9.26122e-168	Male	class_I	IA
C6	[TAD2870_chr15],[Plus]	chr15:4,677,209-4,754,045	NM_016704	Complement component 6, complement component C6 precursor	in utero embryonic development (GO:0001701); positive regulation of activation of membrane attack complex (GO:0001970); extracellular space (GO:0005615); activation of cysteine-type endopeptidase activity involved in apoptotic process (GO:0006919); complement activation (GO:0006956); positive regulation of apoptotic process (GO:0043065); positive regulation of angiogenesis (GO:0045766); positive …	C6	RefSeq	8.76068	8.76068	4.24511	35.8833	4.40359e-142	Male	class_I	IB
C7	[TAD2870_chr15],[Minus]	chr15:4,938,761-5,013,773	NM_001243837	Complement component 7, complement component C7 precursor	cellular sodium ion homeostasis (GO:0006883); complement activation (GO:0006956)	C7	RefSeq	2.04661	2.04661	0.160416	0.321934	0.0077025	Male	class_I	IB
C730027H18RIK	[TAD2074_chr10],[Minus]	chr10:70,631,484-70,644,788	NR_038040	RIKEN cDNA C730027H18 gene,	molecular_function (GO:0003674); cellular_component (GO:0005575); biological_process (GO:0008150)	C730027H18Rik	RefSeq	3.15839	3.15839	1.27077	3.90883	5.37512e-26	Male	class_II	IIA
C8A	[TAD885_chr4],[Minus],[Overlapping_Isoform_Count: 2]	chr4:104,488,284-104,549,003 chr4:104,488,290-104,549,000	NM_146148 NM_001290645	Complement component 8, alpha polypeptide, complement component C8 alpha chain isoform 2;complement component C8 alpha chain isoform 3 precursor;complement component C8 alpha chain isoform 1 preproprotein	protein binding (GO:0005515); extracellular region (GO:0005576); membrane attack complex (GO:0005579); extracellular space (GO:0005615); plasma membrane (GO:0005886); immune response (GO:0006955); complement activation (GO:0006956); complement activation, alternative pathway (GO:0006957); complement activation, classical pathway (GO:0006958); membrane (GO:0016020); integral component of membrane …	C8a	RefSeq	3.35069	3.35069	49.2632	159.064	1.43992e-40	Male	class_I	IB
C8B	[TAD885_chr4],[Plus]	chr4:104,438,921-104,477,153	NM_133882	complement component 8, beta polypeptide, complement component C8 beta chain isoform 1 preproprotein;complement component C8 beta chain isoform 2 precursor	extracellular region (GO:0005576); membrane attack complex (GO:0005579); extracellular space (GO:0005615); complement activation, alternative pathway (GO:0006957); complement activation, classical pathway (GO:0006958); cytolysis (GO:0019835); innate immune response (GO:0045087)	C8b	RefSeq	2.97995	2.97995	41.9475	120.549	5.75007e-37	Male	class_I	IB
C9	[TAD2871_chr15],[Plus]	chr15:6,395,332-6,448,476	NM_013485	Complement component 9, complement component C9 precursor	extracellular region (GO:0005576); membrane attack complex (GO:0005579); extracellular space (GO:0005615); plasma membrane (GO:0005886); activation of cysteine-type endopeptidase activity involved in apoptotic process (GO:0006919); immune response (GO:0006955); complement activation (GO:0006956); complement activation, alternative pathway (GO:0006957); complement activation, classical pathway (GO…	C9	RefSeq	3.65713	3.65713	96.7605	341.336	9.09342e-82	Male	class_I	IB
CAD	[TAD999_chr5],[Plus],[Overlapping_Isoform_Count: 3]	chr5:31,357,152-31,380,852	NM_023525 NM_001289522 NM_001289523	Carbamoyl-phosphate synthetase 2, aspartate transcarbamylase, and dihydroorotase, CAD protein isoform 3;CAD protein isoform 2;CAD protein isoform 1	UTP binding (GO:0002134); aspartate carbamoyltransferase activity (GO:0004070); carbamoyl-phosphate synthase (glutamine-hydrolyzing) activity (GO:0004088); dihydroorotase activity (GO:0004151); protein kinase activity (GO:0004672); ATP binding (GO:0005524); obsolete soluble fraction (GO:0005625); nucleus (GO:0005634); cytoplasm (GO:0005737); cytosol (GO:0005829); 'de novo' pyrimidine nucleobase b…	Cad	RefSeq	1.57023	1.57023	0.829748	1.24703	0.00019738	Male	no_response	none
CALN1	[TAD1127_chr5],[Plus],[Overlapping_Isoform_Count: 2]	chr5:130,845,327-131,316,515 chr5:130,924,661-131,316,515	NM_021371 NM_181045	Calneuron 1, calcium-binding protein 8 isoform a;calcium-binding protein 8 isoform b	calcium ion binding (GO:0005509); cellular_component (GO:0005575); cytoplasm (GO:0005737); Golgi apparatus (GO:0005794); plasma membrane (GO:0005886); biological_process (GO:0008150); membrane (GO:0016020); integral component of membrane (GO:0016021)	Caln1	RefSeq	1.56535	1.56535	0.513951	0.785936	0.00987436	Male	class_II	IIA
CAMK2B	[TAD2169_chr11],[Minus],[Overlapping_Isoform_Count: 3]	chr11:5,869,668-5,965,751	NM_001174053 NM_007595 NM_001174054	Calcium/calmodulin-dependent protein kinase II, beta, calcium/calmodulin-dependent protein kinase type II subunit beta isoform 2;calcium/calmodulin-dependent protein kinase type II subunit beta isoform 3;calcium/calmodulin-dependent protein kinase type II subunit beta isoform 1	G1/S transition of mitotic cell cycle (GO:0000082); nucleotide binding (GO:0000166); protein kinase activity (GO:0004672); protein serine/threonine kinase activity (GO:0004674); calmodulin-dependent protein kinase activity (GO:0004683); protein tyrosine kinase activity (GO:0004713); protein binding (GO:0005515); calmodulin binding (GO:0005516); ATP binding (GO:0005524); calcium- and calmodulin-de…	Camk2b	RefSeq	2.64144	2.64144	0.892086	2.2677	8.27778e-05	Male	class_I	IB
CAPN8	[TAD246_chr1],[Plus],[Overlapping_Isoform_Count: 2]	chr1:184,495,137-184,562,483 chr1:184,495,137-184,536,657	NM_130890 NM_001145806	Calpain 8, calpain-8 isoform 2;calpain-8 isoform 1	cysteine-type endopeptidase activity (GO:0004197); calcium-dependent cysteine-type endopeptidase activity (GO:0004198); calcium ion binding (GO:0005509); intracellular (GO:0005622); cytoplasm (GO:0005737); Golgi apparatus (GO:0005794); proteolysis (GO:0006508); peptidase activity (GO:0008233); cysteine-type peptidase activity (GO:0008234); hydrolase activity (GO:0016787)	Capn8	RefSeq	21.1208	21.1208	0.0483094	0.982627	4.00481e-54	Male	class_I	IA
CBLC	[TAD1420_chr7],[Minus],[Overlapping_Isoform_Count: 2]	chr7:20,365,066-20,382,158	NM_001161844 NM_023224	Casitas B-lineage lymphoma c, E3 ubiquitin-protein ligase CBL-C isoform 1;E3 ubiquitin-protein ligase CBL-C isoform 2	ubiquitin ligase complex (GO:0000151); ubiquitin-protein transferase activity (GO:0004842); signal transducer activity (GO:0004871); calcium ion binding (GO:0005509); protein binding (GO:0005515); nucleus (GO:0005634); ubiquitin-dependent protein catabolic process (GO:0006511); signal transduction (GO:0007165); cell surface receptor signaling pathway (GO:0007166); zinc ion binding (GO:0008270); p…	Cblc	RefSeq	1.58825	1.58825	4.43101	6.78768	3.66055e-07	Male	no_response	none
CCDC171	[TAD849_chr4],[Plus]	chr4:83,171,448-83,510,574	NM_001081012			Ccdc171	RefSeq	1.71788	1.71788	0.25618	0.434826	0.00273355	Male	class_I	IA
CCNE1	[TAD1431_chr7],[Minus]	chr7:38,883,002-38,892,509	NM_007633	Cyclin E1, G1/S-specific cyclin-E1	cyclin-dependent protein kinase holoenzyme complex (GO:0000307); protein binding (GO:0005515); nucleus (GO:0005634); cytoplasm (GO:0005737); centrosome (GO:0005813); DNA replication initiation (GO:0006270); protein phosphorylation (GO:0006468); cell cycle (GO:0007049); kinase activity (GO:0016301); cyclin-dependent protein serine/threonine kinase regulator activity (GO:0016538); regulation of pho…	Ccne1	RefSeq	3.0755	3.0755	0.147403	0.451757	6.32718e-05	Male	class_I	IA
CCNF	[TAD3171_chr17],[Minus],[Overlaps with:Mir5134;Mir6965]	chr17:24,360,176-24,388,354	NM_007634	Cyclin F, cyclin-F	re-entry into mitotic cell cycle (GO:0000320); cytokinesis (GO:0000910); placenta development (GO:0001890); nucleus (GO:0005634); cell cycle (GO:0007049); cyclin-dependent protein serine/threonine kinase regulator activity (GO:0016538); cell division (GO:0051301)	Ccnf	RefSeq	1.81273	1.81273	0.528555	0.922158	0.00196505	Male	class_I	IB
CES1E	[TAD1713_chr8],[Minus]	chr8:95,725,116-95,753,518	NM_133660			Ces1e	RefSeq	1.63096	1.63096	41.0488	64.5873	9.4642e-09	Male	no_response	none
CES2B	[TAD1722_chr8],[Plus]	chr8:107,355,543-107,362,552	NM_198171			Ces2b	RefSeq	14.7374	14.7374	0.0282149	0.448454	1.14927e-11	Male	class_I	IA
CES2C	[TAD1722_chr8],[Plus]	chr8:107,370,967-107,378,382	NM_145603			Ces2c	RefSeq	2.08273	2.08273	1.85839	3.78804	2.36247e-08	Male	class_I	IB
CES3A	[TAD1722_chr8],[Plus],[Overlapping_Isoform_Count: 2]	chr8:107,572,498-107,582,314	NM_198672 NM_001164681			Ces3a	RefSeq	2.23685	2.23685	252.051	543.833	3.20058e-24	Male	class_I	IB
CES3B	[TAD1722_chr8],[Plus],[Overlapping_Isoform_Count: 2]	chr8:107,607,654-107,617,491	NM_001159415 NM_144511			Ces3b	RefSeq	1.75235	1.75235	93.0507	157.323	4.17951e-08	Male	class_I	IB
CES4A	[TAD1722_chr8],[Plus]	chr8:107,655,699-107,674,009	NM_146213			Ces4a	RefSeq	10.0163	10.0163	0.138346	1.34438	6.56277e-29	Male	class_I	IA
CHAC1	[TAD439_chr2],[Plus]	chr2:119,176,977-119,180,062	NM_026929	ChaC, cation transport regulator-like 1 (E. coli), glutathione-specific gamma-glutamylcyclotransferase 1	molecular_function (GO:0003674); cellular_component (GO:0005575); cytoplasm (GO:0005737); apoptotic process (GO:0006915); response to unfolded protein (GO:0006986); biological_process (GO:0008150)	Chac1	RefSeq	2.18581	2.18581	0.703956	1.48944	0.00906076	Male	class_I	IA
CHPT1	[TAD2100_chr10],[Minus],[Overlapping_Isoform_Count: 3]	chr10:87,936,220-87,966,715 chr10:87,935,557-87,966,715	NM_144807 NM_001146690 NR_027477	Choline phosphotransferase 1, cholinephosphotransferase 1 isoform 2;cholinephosphotransferase 1 isoform 1	molecular_function (GO:0003674); diacylglycerol cholinephosphotransferase activity (GO:0004142); cellular_component (GO:0005575); Golgi apparatus (GO:0005794); CDP-choline pathway (GO:0006657); biological_process (GO:0008150); phospholipid biosynthetic process (GO:0008654); membrane (GO:0016020); integral component of membrane (GO:0016021); transferase activity (GO:0016740); phosphotransferase ac…	Chpt1	RefSeq	1.7315	1.7315	12.6865	21.1588	1.23957e-11	Male	no_response	none
CHRNA2	[TAD2814_chr14],[Plus]	chr14:66,759,796-66,771,785	NM_144803	Cholinergic receptor, nicotinic, alpha polypeptide 2 (neuronal), neuronal acetylcholine receptor subunit alpha-2 precursor	GABA-A receptor activity (GO:0004890); ion channel activity (GO:0005216); extracellular ligand-gated ion channel activity (GO:0005230); extracellular space (GO:0005615); obsolete membrane fraction (GO:0005624); plasma membrane (GO:0005886); transport (GO:0006810); ion transport (GO:0006811); cation transport (GO:0006812); signal transduction (GO:0007165); chemical synaptic transmission (GO:000726…	Chrna2	RefSeq	2.05694	2.05694	0.274478	0.532394	8.17124e-05	Male	no_response	none
CIART	[TAD667_chr3],[Minus]	chr3:95,682,427-95,686,151	NM_001033302			Ciart	RefSeq	2.90095	2.90095	0.52363	1.4854	2.59226e-05	Male	class_II	IIB
CIB3	[TAD1683_chr8],[Minus]	chr8:74,728,233-74,736,736	NM_001080812	Calcium and integrin binding family member 3, calcium and integrin-binding family member 3	molecular_function (GO:0003674); cellular_component (GO:0005575); integrin-mediated signaling pathway (GO:0007229); biological_process (GO:0008150)	Cib3	RefSeq	8.23509	8.23509	0.337525	2.70533	1.72155e-20	Male	no_response	none
CIDEC	[TAD1328_chr6],[Minus],[Overlapping_Isoform_Count: 2]	chr6:113,374,629-113,385,749 chr6:113,374,627-113,385,754	NM_178373 NM_001301295	Cell death-inducing DFFA-like effector c, cell death activator CIDE-3	protein binding (GO:0005515); intracellular (GO:0005622); cytoplasm (GO:0005737); cytosol (GO:0005829); apoptotic process (GO:0006915)	Cidec	RefSeq	1.72484	1.72484	0.403749	0.693696	0.0247277	Male	no_response	none
CLEC2H	[TAD1364_chr6],[Plus]	chr6:128,612,402-128,627,392	NM_053165	C-type lectin domain family 2, member h, C-type lectin domain family 2 member H	transmembrane signaling receptor activity (GO:0004888); binding (GO:0005488); plasma membrane (GO:0005886); integral component of plasma membrane (GO:0005887); cellular defense response (GO:0006968); signal transduction (GO:0007165); membrane (GO:0016020); integral component of membrane (GO:0016021)	Clec2h	RefSeq	3.97205	3.97205	0.680508	2.65308	3.65405e-18	Male	class_I	IA
CLSTN3	[TAD1355_chr6],[Minus]	chr6:124,380,773-124,414,802	NM_153508	Calsyntenin 3, calsyntenin-3 precursor	molecular_function (GO:0003674); calcium ion binding (GO:0005509); protein binding (GO:0005515); endoplasmic reticulum (GO:0005783); Golgi apparatus (GO:0005794); plasma membrane (GO:0005886); cell adhesion (GO:0007155); homophilic cell adhesion via plasma membrane adhesion molecules (GO:0007156); biological_process (GO:0008150); membrane (GO:0016020); integral component of membrane (GO:0016021);…	Clstn3	RefSeq	1.87631	1.87631	0.20182	0.36039	0.0155599	Male	class_II	IIA
CML2	[TAD1288_chr6],[Minus]	chr6:85,815,415-85,819,131	NM_053096	Camello-like 2, probable N-acetyltransferase CML2	gastrulation with mouth forming second (GO:0001702); extracellular space (GO:0005615); endoplasmic reticulum (GO:0005783); Golgi apparatus (GO:0005794); negative regulation of cell adhesion (GO:0007162); multicellular organism development (GO:0007275); gastrulation (GO:0007369); N-acetyltransferase activity (GO:0008080); metabolic process (GO:0008152); membrane (GO:0016020); integral component of…	Cml2	RefSeq	1.50112	1.50112	129.13	186.722	1.28125e-08	Male	class_I	IB
CML5	[TAD1288_chr6],[Minus]	chr6:85,767,211-85,770,966	NM_023493	Camello-like 5, probable N-acetyltransferase CML5	gastrulation with mouth forming second (GO:0001702); extracellular space (GO:0005615); endoplasmic reticulum (GO:0005783); Golgi apparatus (GO:0005794); negative regulation of cell adhesion (GO:0007162); multicellular organism development (GO:0007275); gastrulation (GO:0007369); N-acetyltransferase activity (GO:0008080); metabolic process (GO:0008152); membrane (GO:0016020); integral component of…	Cml5	RefSeq	26.5238	26.5238	0.308308	8.23661	1.07125e-117	Male	class_I	IA
COL27A1	[TAD834_chr4],[Plus],[Overlaps with:Mir455]	chr4:62,876,445-62,996,024	NM_025685	Collagen, type XXVII, alpha 1, collagen alpha-1(XXVII) chain preproprotein	molecular_function (GO:0003674); structural molecule activity (GO:0005198); extracellular matrix structural constituent (GO:0005201); extracellular region (GO:0005576); (GO:0005578); collagen trimer (GO:0005581); fibrillar collagen trimer (GO:0005583); cell adhesion (GO:0007155); biological_process (GO:0008150)	Col27a1	RefSeq	2.94191	2.94191	1.13585	3.2334	9.98973e-41	Male	class_II	IIA
COL5A3	[TAD1781_chr9],[Minus]	chr9:20,574,493-20,619,478	NM_016919	Collagen, type V, alpha 3, collagen alpha-3(V) chain isoform 2 precursor;collagen alpha-3(V) chain isoform 1 precursor	structural molecule activity (GO:0005198); extracellular matrix structural constituent (GO:0005201); (GO:0005578); collagen trimer (GO:0005581); collagen type V trimer (GO:0005588); extracellular space (GO:0005615); cell adhesion (GO:0007155); cell-matrix adhesion (GO:0007160); heparin binding (GO:0008201); extracellular matrix organization (GO:0030198)	Col5a3	RefSeq	2.89673	2.89673	0.308067	0.868924	6.27511e-21	Male	class_II	IIA
COMT	[TAD3030_chr16],[Minus],[Overlapping_Isoform_Count: 3]	chr16:18,406,974-18,413,587 chr16:18,406,974-18,426,809	NM_001111062 NM_007744 NM_001111063	Catechol-O-methyltransferase, catechol O-methyltransferase	magnesium ion binding (GO:0000287); extracellular space (GO:0005615); catecholamine metabolic process (GO:0006584); methyltransferase activity (GO:0008168); O-methyltransferase activity (GO:0008171); S-adenosylmethionine-dependent methyltransferase activity (GO:0008757); integral component of membrane (GO:0016021); catechol O-methyltransferase activity (GO:0016206); transferase activity (GO:00167…	Comt	RefSeq	2.2086	2.2086	85.1186	181.209	4.42279e-25	Male	class_I	IA
CPNE2	[TAD1716_chr8],[Plus]	chr8:97,056,927-97,094,429	NM_153507	Copine II, copine-2	molecular_function (GO:0003674); cellular_component (GO:0005575); biological_process (GO:0008150)	Cpne2	RefSeq	1.52417	1.52417	1.79447	2.63981	0.000144119	Male	no_response	none
CPNE8	[TAD2984_chr15],[Minus],[Overlapping_Isoform_Count: 2]	chr15:90,317,911-90,509,819 chr15:90,473,753-90,509,819	NM_025815 NM_001033851	Copine VIII, copine-8 isoform 1;copine-8 isoform 2	molecular_function (GO:0003674); cellular_component (GO:0005575); biological_process (GO:0008150)	Cpne8	RefSeq	1.90332	1.90332	0.75404	1.36136	1.22266e-06	Male	no_response	none
CPSF4L	[TAD2362_chr11],[Minus],[Overlapping_Isoform_Count: 3]	chr11:113,559,484-113,571,331 chr11:113,559,484-113,570,840	NM_026682 NM_029794 NM_001164532	Cleavage and polyadenylation specific factor 4-like, putative cleavage and polyadenylation specificity factor subunit 4-like protein isoform 2;putative cleavage and polyadenylation specificity factor subunit 4-like protein isoform 3;putative cleavage and polyadenylation specificity factor subunit 4-like protein isoform 1	molecular_function (GO:0003674); cellular_component (GO:0005575); biological_process (GO:0008150); metal ion binding (GO:0046872)	Cpsf4l	RefSeq	2.20565	2.20565	0.927743	1.99687	3.86914e-09	Male	class_I	IA
CRLF2	[TAD1093_chr5],[Minus],[Overlapping_Isoform_Count: 2]	chr5:109,983,727-109,988,012	NM_016715 NM_001164735	Cytokine receptor-like factor 2, cytokine receptor-like factor 2 isoform 1 precursor;cytokine receptor-like factor 2 isoform 3;cytokine receptor-like factor 2 isoform 2 precursor	cytokine receptor activity (GO:0004896); cytokine activity (GO:0005125); extracellular region (GO:0005576); extracellular space (GO:0005615); plasma membrane (GO:0005886); signal transduction (GO:0007165); membrane (GO:0016020); integral component of membrane (GO:0016021)	Crlf2	RefSeq	1.53979	1.53979	0.911106	1.35777	0.0215547	Male	no_response	none
CRYBB3	[TAD1098_chr5],[Minus],[Overlapping_Isoform_Count: 2]	chr5:113,504,858-113,510,604	NM_021352 NM_001159650	Crystallin, beta B3, beta-crystallin B3	structural constituent of eye lens (GO:0005212); cytoplasm (GO:0005737); sensory organ development (GO:0007423)	Crybb3	RefSeq	1.65817	1.65817	1.21348	1.95279	0.0152163	Male	class_I	IA
CSAD	[TAD3004_chr15],[Minus]	chr15:102,007,428-102,019,474	NM_144942	Cysteine sulfinic acid decarboxylase, cysteine sulfinic acid decarboxylase	nucleic acid binding (GO:0003676); catalytic activity (GO:0003824); sulfinoalanine decarboxylase activity (GO:0004782); cellular_component (GO:0005575); cellular amino acid metabolic process (GO:0006520); lyase activity (GO:0016829); carboxy-lyase activity (GO:0016831); L-cysteine catabolic process to taurine (GO:0019452); taurine metabolic process (GO:0019530); carboxylic acid metabolic process …	Csad	RefSeq	3.64856	3.64856	16.449	57.7018	1.07367e-33	Male	class_I	IB
CSPG5	[TAD1945_chr9],[Plus],[Overlapping_Isoform_Count: 2]	chr9:110,146,286-110,165,080	NM_013884 NM_001166273	Chondroitin sulfate proteoglycan 5, chondroitin sulfate proteoglycan 5 isoform b precursor;chondroitin sulfate proteoglycan 5 isoform a precursor	extracellular space (GO:0005615); endoplasmic reticulum (GO:0005783); Golgi apparatus (GO:0005794); plasma membrane (GO:0005886); multicellular organism development (GO:0007275); nervous system development (GO:0007399); membrane (GO:0016020); integral component of membrane (GO:0016021); cell differentiation (GO:0030154); regulation of growth (GO:0040008); modulation of chemical synaptic transmiss…	Cspg5	RefSeq	16.078	16.078	0.0531267	0.83468	2.05787e-53	Male	class_I	IA
CTPS	[TAD917_chr4],[Minus]	chr4:120,212,472-120,242,881	NM_016748	Cytidine 5'-triphosphate synthase, CTP synthase 1	nucleotide binding (GO:0000166); molecular_function (GO:0003674); catalytic activity (GO:0003824); CTP synthase activity (GO:0003883); ATP binding (GO:0005524); cellular_component (GO:0005575); pyrimidine nucleotide biosynthetic process (GO:0006221); glutamine metabolic process (GO:0006541); biological_process (GO:0008150); ligase activity (GO:0016874)	Ctps	RefSeq	1.6007	1.6007	0.96343	1.47267	0.00534096	Male	no_response	none
CXCL14	[TAD2626_chr13],[Minus]	chr13:56,390,005-56,397,912	NM_019568	Chemokine (C-X-C motif) ligand 14, C-X-C motif chemokine 14 precursor	cytokine activity (GO:0005125); extracellular region (GO:0005576); extracellular space (GO:0005615); immune response (GO:0006955); chemokine activity (GO:0008009)	Cxcl14	RefSeq	3.58402	3.58402	0.487863	1.65892	6.155e-15	Male	class_I	IA
CYP21A1	[TAD3195_chr17],[Minus]	chr17:34,938,292-34,941,371	NM_009995	Cytochrome P450, family 21, subfamily a, polypeptide 1, steroid 21-hydroxylase precursor	monooxygenase activity (GO:0004497); steroid 21-monooxygenase activity (GO:0004509); steroid binding (GO:0005496); iron ion binding (GO:0005506); extracellular space (GO:0005615); endoplasmic reticulum (GO:0005783); obsolete microsome (GO:0005792); obsolete electron transport (GO:0006118); steroid biosynthetic process (GO:0006694); C21-steroid hormone biosynthetic process (GO:0006700); lipid bind…	Cyp21a1	RefSeq	4.37781	4.37781	0.321418	1.36731	4.83227e-16	Male	no_response	none
CYP2C53-PS	[TAD3479_chr19],[Plus]	chr19:39,303,743-39,349,227	NR_033614			Cyp2c53-ps	RefSeq	9.8627	9.8627	0.0470409	0.495653	5.97459e-11	Male	class_I	IA
CYP2C67	[TAD3479_chr19],[Minus]	chr19:39,683,348-39,723,532	NM_001024719	cytochrome P450, family 2, subfamily c, polypeptide 67, cytochrome P450, family 2, subfamily c, polypeptide 67 precursor	molecular_function (GO:0003674); monooxygenase activity (GO:0004497); cellular_component (GO:0005575); biological_process (GO:0008150); oxidoreductase activity (GO:0016491); metal ion binding (GO:0046872); oxidation-reduction process (GO:0055114)	Cyp2c67	RefSeq	4.98606	4.98606	29.5282	142.204	1.75519e-60	Male	class_I	IA
CYP2D40	[TAD2974_chr15],[Minus]	chr15:82,590,262-82,594,552	NM_023623	Cytochrome P450, family 2, subfamily d, polypeptide 40, cytochrome P450, family 2, subfamily d, polypeptide 40	molecular_function (GO:0003674); monooxygenase activity (GO:0004497); cellular_component (GO:0005575); biological_process (GO:0008150); oxidoreductase activity (GO:0016491); metal ion binding (GO:0046872); oxidation-reduction process (GO:0055114)	Cyp2d40	RefSeq	2.07781	2.07781	7.1477	14.2622	8.08415e-13	Male	no_response	none
CYP2D9	[TAD2973_chr15],[Plus]	chr15:82,282,806-82,287,257	NM_010006	cytochrome P450, family 2, subfamily d, polypeptide 9, cytochrome P450 2D9	monooxygenase activity (GO:0004497); iron ion binding (GO:0005506); endoplasmic reticulum (GO:0005783); obsolete microsome (GO:0005792); electron transfer activity (GO:0009055); membrane (GO:0016020); oxidoreductase activity (GO:0016491); oxidoreductase activity, acting on paired donors, with incorporation or reduction of molecular oxygen, reduced flavin or flavoprotein as one donor, and incorpor…	Cyp2d9	RefSeq	12.4126	12.4126	29.7951	357.117	1.62668e-125	Male	class_I	IC
CYP2F2	[TAD1422_chr7],[Plus]	chr7:27,904,973-27,918,679	NM_007817	Cytochrome P450, family 2, subfamily f, polypeptide 2, cytochrome P450 2F2 precursor	monooxygenase activity (GO:0004497); iron ion binding (GO:0005506); extracellular space (GO:0005615); endoplasmic reticulum (GO:0005783); obsolete microsome (GO:0005792); obsolete electron transport (GO:0006118); transport (GO:0006810); electron transfer activity (GO:0009055); response to toxic substance (GO:0009636); membrane (GO:0016020); oxidoreductase activity (GO:0016491); naphthalene metabo…	Cyp2f2	RefSeq	1.91082	1.91082	288.422	531.445	1.45985e-21	Male	class_I	IB
CYP2J9	[TAD866_chr4],[Minus]	chr4:96,235,119-96,258,176	NM_028979	Cytochrome P450, family 2, subfamily j, polypeptide 9, cytochrome P450, family 2, subfamily j, polypeptide 9	molecular_function (GO:0003674); monooxygenase activity (GO:0004497); cellular_component (GO:0005575); endoplasmic reticulum (GO:0005783); obsolete microsome (GO:0005792); biological_process (GO:0008150); membrane (GO:0016020); oxidoreductase activity (GO:0016491); metal ion binding (GO:0046872); oxidation-reduction process (GO:0055114)	Cyp2j9	RefSeq	1.91825	1.91825	1.67514	3.10419	2.56048e-09	Male	no_response	none
CYP2U1	[TAD730_chr3],[Minus]	chr3:130,993,408-131,006,145	NM_027816	Cytochrome P450, family 2, subfamily u, polypeptide 1, cytochrome P450 2U1	molecular_function (GO:0003674); monooxygenase activity (GO:0004497); iron ion binding (GO:0005506); cellular_component (GO:0005575); endoplasmic reticulum (GO:0005783); obsolete microsome (GO:0005792); biological_process (GO:0008150); electron transfer activity (GO:0009055); membrane (GO:0016020); integral component of membrane (GO:0016021); oxidoreductase activity (GO:0016491); oxidoreductase a…	Cyp2u1	RefSeq	6.32973	6.32973	1.96057	11.9861	4.91523e-87	Male	class_I	IA
CYP3A11	[TAD1156_chr5],[Minus]	chr5:146,666,182-146,691,430	NM_007818	Cytochrome P450, family 3, subfamily a, polypeptide 11, cytochrome P450 3A11	monooxygenase activity (GO:0004497); iron ion binding (GO:0005506); endoplasmic reticulum (GO:0005783); endoplasmic reticulum membrane (GO:0005789); obsolete microsome (GO:0005792); obsolete electron transport (GO:0006118); transport (GO:0006810); electron transfer activity (GO:0009055); membrane (GO:0016020); oxidoreductase activity (GO:0016491); oxidoreductase activity, acting on paired donors,…	Cyp3a11	RefSeq	1.55458	1.55458	785.038	1176.87	4.24685e-08	Male	no_response	none
CYP4A12A	[TAD906_chr4],[Plus]	chr4:114,971,650-115,005,420	NM_177406	Cytochrome P450, family 4, subfamily a, polypeptide 12a, cytochrome P450 4A12A	monooxygenase activity (GO:0004497); iron ion binding (GO:0005506); endoplasmic reticulum (GO:0005783); obsolete microsome (GO:0005792); fatty acid metabolic process (GO:0006631); electron transfer activity (GO:0009055); membrane (GO:0016020); oxidoreductase activity (GO:0016491); arachidonic acid metabolic process (GO:0019369); heme binding (GO:0020037); metal ion binding (GO:0046872); lauric ac…	Cyp4a12a	RefSeq	43.3178	43.3178	2.44505	102.958	3.2422e-29	Male	class_II	IIA
CYP4A12B	[TAD906_chr4],[Plus]	chr4:115,084,228-115,111,639	NM_172306	Cytochrome P450, family 4, subfamily a, polypeptide 12B, cytochrome P450, family 4, subfamily a family	monooxygenase activity (GO:0004497); oxidoreductase activity (GO:0016491); metal ion binding (GO:0046872); oxidation-reduction process (GO:0055114)	Cyp4a12b	RefSeq	124.888	124.888	0.0704067	9.01447	2.77948e-245	Male	class_I	IC
CYP4A32	[TAD906_chr4],[Plus]	chr4:115,273,542-115,294,971	NM_001100181	cytochrome P450, family 4, subfamily a, polypeptide 32, cytochrome P450, family 4, subfamily a, polypeptide 32	molecular_function (GO:0003674); monooxygenase activity (GO:0004497); cellular_component (GO:0005575); biological_process (GO:0008150); oxidoreductase activity (GO:0016491); metal ion binding (GO:0046872); oxidation-reduction process (GO:0055114)	Cyp4a32	RefSeq	2.23546	2.23546	4.57416	9.92521	3.2747e-10	Male	class_II	IIA
CYP4V3	[TAD1646_chr8],[Minus]	chr8:46,391,155-46,418,550	NM_133969	cytochrome P450, family 4, subfamily v, polypeptide 3, cytochrome P450 4V2	monooxygenase activity (GO:0004497); oxidoreductase activity (GO:0016491)	Cyp4v3	RefSeq	1.8387	1.8387	60.9124	107.984	2.88242e-18	Male	class_I	IA
CYP7B1	[TAD559_chr3],[Minus]	chr3:17,971,949-18,143,338	NM_007825	Cytochrome P450, family 7, subfamily b, polypeptide 1, 25-hydroxycholesterol 7-alpha-hydroxylase	monooxygenase activity (GO:0004497); iron ion binding (GO:0005506); extracellular space (GO:0005615); endoplasmic reticulum (GO:0005783); obsolete microsome (GO:0005792); obsolete electron transport (GO:0006118); lipid metabolic process (GO:0006629); bile acid biosynthetic process (GO:0006699); transport (GO:0006810); digestion (GO:0007586); memory (GO:0007613); circadian rhythm (GO:0007623); ste…	Cyp7b1	RefSeq	7.29573	7.29573	12.89	90.8918	1.48963e-120	Male	class_I	IB
CYP8B1	[TAD1965_chr9],[Minus]	chr9:121,823,473-121,825,423	NM_010012	Cytochrome P450, family 8, subfamily b, polypeptide 1, 7-alpha-hydroxycholest-4-en-3-one 12-alpha-hydroxylase	monooxygenase activity (GO:0004497); iron ion binding (GO:0005506); extracellular space (GO:0005615); endoplasmic reticulum (GO:0005783); obsolete microsome (GO:0005792); obsolete electron transport (GO:0006118); transport (GO:0006810); sterol 12-alpha-hydroxylase activity (GO:0008397); electron transfer activity (GO:0009055); membrane (GO:0016020); integral component of membrane (GO:0016021); ox…	Cyp8b1	RefSeq	1.6339	1.6339	44.3627	69.8724	7.2887e-12	Male	class_I	IA
CYS1	[TAD2403_chr12],[Minus],[Overlapping_Isoform_Count: 3]	chr12:25,350,702-25,366,660	NM_138686 NM_001004455 NM_001161807	Cystin 1, cystin-1	molecular_function (GO:0003674); cytoplasm (GO:0005737); cytoskeleton (GO:0005856); cilium (GO:0005929); biological_process (GO:0008150); cell projection (GO:0042995)	Cys1	RefSeq	1.50365	1.50365	0.967594	1.38407	0.0191601	Male	no_response	none
D7ERTD143E	[TAD1401_chr7begin],[Plus],[Overlaps with:Mir291a;Mir291b;Mir292;Mir293;Mir294;Mir295]	chr7:3,218,784-3,221,016	NR_028425			D7Ertd143e	RefSeq	2.37526	2.37526	0.328744	0.746473	4.30839e-05	Male	no_response	none
DBP	[TAD1436_chr7],[Plus]	chr7:52,960,616-52,965,573	NM_016974	D site albumin promoter binding protein, D site-binding protein	DNA binding (GO:0003677); DNA binding transcription factor activity (GO:0003700); nucleus (GO:0005634); regulation of transcription, DNA-templated (GO:0006355); circadian rhythm (GO:0007623); sequence-specific DNA binding (GO:0043565); protein dimerization activity (GO:0046983); rhythmic process (GO:0048511)	Dbp	RefSeq	2.75415	2.75415	3.15085	8.43917	2.16871e-11	Male	class_II	IIB
DDX3Y	[TADchrY_chrY],[Minus]	chrY:597,157-623,056	NM_012008	DEAD (Asp-Glu-Ala-Asp) box polypeptide 3, Y-linked, ATP-dependent RNA helicase DDX3Y	nucleotide binding (GO:0000166); nucleic acid binding (GO:0003676); DNA binding (GO:0003677); RNA binding (GO:0003723); ATP-dependent RNA helicase activity (GO:0004004); helicase activity (GO:0004386); ATP binding (GO:0005524); nucleus (GO:0005634); cytoplasm (GO:0005737); obsolete ATP catabolic process (GO:0006200); ATP-dependent helicase activity (GO:0008026); hydrolase activity (GO:0016787); A…	Ddx3y	RefSeq	304.839	304.839	0.0303213	9.60306	0	Male	no_response	none
DERL3	[TAD2080_chr10],[Plus]	chr10:75,356,142-75,358,686	NM_024440	Der1-like domain family, member 3, derlin-3	endoplasmic reticulum (GO:0005783); membrane (GO:0016020); integral component of membrane (GO:0016021)	Derl3	RefSeq	3.29134	3.29134	0.468028	1.42362	8.1332e-05	Male	class_I	IA
DIRC2	[TAD3067_chr16],[Minus]	chr16:35,694,988-35,769,442	NM_153550	Disrupted in renal carcinoma 2 (human), disrupted in renal carcinoma protein 2 homolog	molecular_function (GO:0003674); cellular_component (GO:0005575); transport (GO:0006810); biological_process (GO:0008150); peptidase activity (GO:0008233); membrane (GO:0016020); integral component of membrane (GO:0016021)	Dirc2	RefSeq	1.8196	1.8196	2.79182	4.90987	2.92417e-15	Male	class_I	IA
DNAIC1	[TAD799_chr4],[Plus]	chr4:41,516,826-41,585,191	NM_175138	Dynein, axonemal, intermediate chain 1, dynein intermediate chain 1, axonemal	motor activity (GO:0003774); cytoskeleton (GO:0005856); microtubule (GO:0005874); cilium (GO:0005929); microtubule-based process (GO:0007017); dynein complex (GO:0030286)	Dnaic1	RefSeq	2.4688	2.4688	0.494628	1.16369	7.81629e-05	Male	class_I	IB
DNAJC12	[TAD2063_chr10],[Plus],[Overlapping_Isoform_Count: 2]	chr10:62,849,310-62,871,588 chr10:62,845,190-62,871,588	NM_013888 NM_001253685	DnaJ (Hsp40) homolog, subfamily C, member 12, dnaJ homolog subfamily C member 12 isoform 2;dnaJ homolog subfamily C member 12 isoform 1	molecular_function (GO:0003674); cellular_component (GO:0005575); protein folding (GO:0006457); biological_process (GO:0008150); heat shock protein binding (GO:0031072); unfolded protein binding (GO:0051082)	Dnajc12	RefSeq	2.10921	2.10921	2.99561	6.02089	1.41216e-10	Male	class_II	IIB
DPY19L1	[TAD1786_chr9],[Minus]	chr9:24,216,224-24,307,584	NM_172920	Dpy-19-like 1 (C. elegans), probable C-mannosyltransferase DPY19L1	molecular_function (GO:0003674); cellular_component (GO:0005575); biological_process (GO:0008150); membrane (GO:0016020); integral component of membrane (GO:0016021)	Dpy19l1	RefSeq	1.61037	1.61037	3.89626	6.04646	4.32306e-09	Male	no_response	none
DPY19L3	[TAD1429_chr7],[Minus]	chr7:36,470,518-36,539,473	NM_178704	Dpy-19-like 3 (C. elegans), probable C-mannosyltransferase DPY19L3	molecular_function (GO:0003674); cellular_component (GO:0005575); biological_process (GO:0008150); membrane (GO:0016020); integral component of membrane (GO:0016021)	Dpy19l3	RefSeq	3.66971	3.66971	0.644821	2.30451	1.58361e-41	Male	class_I	IA
DREH	[TAD3229_chr17],[Plus],[Multi-counted reads: -, -, Intron-only_counting]	chr17:65,116,450-65,117,271	NR_105051			Dreh	RefSeq	2.91536	2.91536	0.140134	0.398463	0.0432214	Male	no_response	none
DSG1C	[TAD3292_chr18],[Plus]	chr18:20,405,840-20,442,424	NM_181680	Desmoglein 1 gamma, desmoglein-1-gamma precursor	calcium ion binding (GO:0005509); protein binding (GO:0005515); cytoskeleton (GO:0005856); plasma membrane (GO:0005886); cell adhesion (GO:0007155); homophilic cell adhesion via plasma membrane adhesion molecules (GO:0007156); membrane (GO:0016020); integral component of membrane (GO:0016021); cell junction (GO:0030054); desmosome (GO:0030057)	Dsg1c	RefSeq	1.72455	1.72455	1.12976	1.89974	0.00676569	Male	class_II	IIB
EFNA3	[TAD657_chr3],[Minus]	chr3:89,118,872-89,126,801	NM_010108	Ephrin A3, ephrin-A3 precursor	plasma membrane (GO:0005886); membrane (GO:0016020); anchored component of membrane (GO:0031225); regulation of neuron differentiation (GO:0045664)	Efna3	RefSeq	2.20874	2.20873	1.15596	2.45469	2.60508e-07	Male	no_response	none
EGFR	[TAD2181_chr11],[Plus],[Overlapping_Isoform_Count: 2]	chr11:16,652,205-16,813,910 chr11:16,652,205-16,787,661	NM_207655 NM_007912	Epidermal growth factor receptor, epidermal growth factor receptor isoform 1 precursor;epidermal growth factor receptor isoform 2 precursor	nucleotide binding (GO:0000166); activation of MAPKK activity (GO:0000186); cell morphogenesis (GO:0000902); embryonic placenta development (GO:0001892); hair follicle development (GO:0001942); protein kinase activity (GO:0004672); protein tyrosine kinase activity (GO:0004713); transmembrane receptor protein tyrosine kinase activity (GO:0004714); signal transducer, downstream of receptor, with pr…	Egfr	RefSeq	2.46113	2.46113	21.5827	51.2284	3.13005e-21	Male	class_I	IB
EIF2S3Y	[TADchrY_chrY],[Plus]	chrY:347,054-365,037	NM_012011	Eukaryotic translation initiation factor 2, subunit 3, structural gene Y-linked, eukaryotic translation initiation factor 2 subunit 3, Y-linked	nucleotide binding (GO:0000166); translation initiation factor activity (GO:0003743); GTPase activity (GO:0003924); GTP binding (GO:0005525); obsolete GTP catabolic process (GO:0006184); translation (GO:0006412); positive regulation of translational initiation (GO:0045948)	Eif2s3y	RefSeq	238.357	238.357	0.0644544	16.1097	0	Male	no_response	none
EIF4EBP3	[TAD3317_chr18],[Plus]	chr18:36,823,713-36,825,978	NM_201256	Eukaryotic translation initiation factor 4E binding protein 3, eukaryotic translation initiation factor 4E-binding protein 3	molecular_function (GO:0003674); DNA binding (GO:0003677); DNA binding transcription factor activity (GO:0003700); cellular_component (GO:0005575); regulation of transcription, DNA-templated (GO:0006355); biological_process (GO:0008150)	Eif4ebp3	RefSeq	1.80184	1.80184	6.21896	10.8454	3.6275e-12	Male	class_I	IA
ELOVL3	[TAD3492_chr19],[Plus]	chr19:46,206,388-46,210,184	NM_007703	Elongation of very long chain fatty acids (FEN1/Elo2, SUR4/Elo3, yeast)-like 3, elongation of very long chain fatty acids protein 3	endoplasmic reticulum (GO:0005783); fatty acid biosynthetic process (GO:0006633); lipid biosynthetic process (GO:0008610); membrane (GO:0016020); integral component of membrane (GO:0016021)	Elovl3	RefSeq	44.1463	44.1463	1.52669	64.5548	1.50686e-244	Male	class_I	IB
ENPP2	[TAD2929_chr15],[Minus],[Overlapping_Isoform_Count: 4]	chr15:54,670,233-54,751,701	NM_015744 NM_001136077 NM_001285994 NM_001285995	Ectonucleotide pyrophosphatase/phosphodiesterase 2, ectonucleotide pyrophosphatase/phosphodiesterase family member 2 isoform 3;ectonucleotide pyrophosphatase/phosphodiesterase family member 2 isoform 1;ectonucleotide pyrophosphatase/phosphodiesterase family member 2 isoform 4;ectonucleotide pyrophosphatase/phosphodiesterase family member 2 isoform 2 preproprotein	nucleic acid binding (GO:0003676); catalytic activity (GO:0003824); endonuclease activity (GO:0004519); phosphodiesterase I activity (GO:0004528); nucleotide diphosphatase activity (GO:0004551); scavenger receptor activity (GO:0005044); extracellular region (GO:0005576); extracellular space (GO:0005615); integral component of plasma membrane (GO:0005887); chemotaxis (GO:0006935); immune response …	Enpp2	RefSeq	1.6516	1.6516	6.44497	10.2836	2.5803e-11	Male	class_II	IIB
ENPP3	[TAD2006_chr10],[Minus]	chr10:24,493,619-24,556,001	NM_134005	Ectonucleotide pyrophosphatase/phosphodiesterase 3, ectonucleotide pyrophosphatase/phosphodiesterase family member 3	molecular_function (GO:0003674); nucleic acid binding (GO:0003676); catalytic activity (GO:0003824); endonuclease activity (GO:0004519); phosphodiesterase I activity (GO:0004528); nucleotide diphosphatase activity (GO:0004551); scavenger receptor activity (GO:0005044); cellular_component (GO:0005575); extracellular region (GO:0005576); immune response (GO:0006955); signal transduction (GO:0007165…	Enpp3	RefSeq	2.68885	2.68885	3.76058	9.80398	7.94338e-31	Male	class_II	IIA
EPHX1	[TAD241_chr1],[Minus]	chr1:182,919,686-182,947,626	NM_010145	Epoxide hydrolase 1, microsomal, epoxide hydrolase 1 isoform 2 precursor;epoxide hydrolase 1 isoform 1 precursor	catalytic activity (GO:0003824); aminopeptidase activity (GO:0004177); epoxide hydrolase activity (GO:0004301); extracellular space (GO:0005615); endoplasmic reticulum (GO:0005783); obsolete microsome (GO:0005792); proteolysis (GO:0006508); cellular aromatic compound metabolic process (GO:0006725); xenobiotic metabolic process (GO:0006805); response to toxic substance (GO:0009636); response to or…	Ephx1	RefSeq	2.09245	2.09245	43.7058	88.1539	1.12634e-22	Male	class_II	IIA
EPHX2	[TAD2814_chr14],[Minus],[Overlapping_Isoform_Count: 4]	chr14:66,703,208-66,729,497 chr14:66,703,208-66,731,223 chr14:66,703,208-66,743,359	NM_007940 NM_001271402 NM_001271403 NM_001271421	Epoxide hydrolase 2, cytoplasmic, bifunctional epoxide hydrolase 2 isoform a;bifunctional epoxide hydrolase 2 isoform b;bifunctional epoxide hydrolase 2 isoform d;bifunctional epoxide hydrolase 2 isoform c precursor	magnesium ion binding (GO:0000287); prostaglandin production involved in inflammatory response (GO:0002539); catalytic activity (GO:0003824); epoxide hydrolase activity (GO:0004301); extracellular space (GO:0005615); cytoplasm (GO:0005737); peroxisome (GO:0005777); cytosol (GO:0005829); cellular aromatic compound metabolic process (GO:0006725); xenobiotic metabolic process (GO:0006805); inflammat…	Ephx2	RefSeq	1.63463	1.63463	66.7368	105.152	1.05228e-11	Male	no_response	none
EPS8L2	[TAD1593_chr7],[Plus]	chr7:148,524,900-148,548,915	NM_133191	EPS8-like 2, epidermal growth factor receptor kinase substrate 8-like protein 2	ruffle (GO:0001726); protein binding (GO:0005515); cytoplasm (GO:0005737); Rac protein signal transduction (GO:0016601); actin filament binding (GO:0051015)	Eps8l2	RefSeq	1.60495	1.60495	6.51921	10.1224	1.65261e-07	Male	no_response	none
ERC2	[TAD2748_chr14],[Plus]	chr14:28,435,627-29,291,723	NM_177814	ELKS/RAB6-interacting/CAST family member 2, ERC protein 2	cytoplasm (GO:0005737); cytoskeleton (GO:0005856); neurotransmitter secretion (GO:0007269); obsolete synaptosome (GO:0019717); cell junction (GO:0030054); growth cone (GO:0030426); presynaptic membrane (GO:0042734); synapse (GO:0045202); synapse organization (GO:0050808)	Erc2	RefSeq	1.57316	1.57316	0.433519	0.661892	0.00064657	Male	no_response	none
ERO1LB	[TAD2545_chr13],[Plus]	chr13:12,658,149-12,701,795	NM_026184	ERO1-like beta (S. cerevisiae), ERO1-like protein beta precursor	molecular_function (GO:0003674); protein binding (GO:0005515); cellular_component (GO:0005575); endoplasmic reticulum (GO:0005783); endoplasmic reticulum membrane (GO:0005789); obsolete electron transport (GO:0006118); transport (GO:0006810); biological_process (GO:0008150); membrane (GO:0016020); oxidoreductase activity (GO:0016491); oxidoreductase activity, acting on a sulfur group of donors, d…	Ero1lb	RefSeq	1.51694	1.51694	7.7105	11.2432	4.4961e-05	Male	class_I	IB
F2R	[TAD2675_chr13],[Minus]	chr13:96,371,743-96,388,388	NM_010169	Coagulation factor II (thrombin) receptor, proteinase-activated receptor 1 precursor	activation of MAPKK activity (GO:0000186); obsolete rhodopsin-like receptor activity (GO:0001584); signal transducer activity (GO:0004871); G-protein coupled receptor activity (GO:0004930); extracellular space (GO:0005615); plasma membrane (GO:0005886); inflammatory response (GO:0006954); signal transduction (GO:0007165); G-protein coupled receptor signaling pathway (GO:0007186); protein kinase C…	F2r	RefSeq	1.72178	1.72178	2.86912	4.77421	1.15167e-09	Male	no_response	none
F830016B08RIK	[TAD3353_chr18],[Plus]	chr18:60,453,033-60,462,670	NM_001101475	RIKEN cDNA F830016B08 gene, interferon-inducible GTPase-like	molecular_function (GO:0003674); cellular_component (GO:0005575); biological_process (GO:0008150)	F830016B08Rik	RefSeq	1.53122	1.53122	1.66322	2.46163	0.000161102	Male	class_I	IA
FABP5	[TAD551_chr3],[Plus],[Overlapping_Isoform_Count: 3]	chr3:10,012,584-10,016,610	NM_010634 NM_001272097 NM_001272098	Fatty acid binding protein 5, epidermal, fatty acid-binding protein, epidermal isoform 2;uncharacterized protein LOC16592 isoform 3;fatty acid-binding protein, epidermal isoform 1	transporter activity (GO:0005215); binding (GO:0005488); fatty acid binding (GO:0005504); cytoplasm (GO:0005737); glucose metabolic process (GO:0006006); lipid metabolic process (GO:0006629); phosphatidylcholine biosynthetic process (GO:0006656); transport (GO:0006810); lipid binding (GO:0008289)	Fabp5	RefSeq	1.50265	1.50265	33.7987	48.9052	0.00228309	Male	class_I	IB
FAM171B	[TAD389_chr2],[Plus]	chr2:83,652,884-83,721,515	NM_175514	Family with sequence similarity 171, member B, protein FAM171B precursor	molecular_function (GO:0003674); cellular_component (GO:0005575); biological_process (GO:0008150); membrane (GO:0016020); integral component of membrane (GO:0016021)	Fam171b	RefSeq	1.89203	1.89203	0.390075	0.728922	4.68407e-05	Male	class_I	IA
FAM188A	[TAD284_chr2],[Minus]	chr2:12,268,890-12,341,087	NM_024185	Family with sequence similarity 188, member A, protein FAM188A	molecular_function (GO:0003674); calcium ion binding (GO:0005509); cellular_component (GO:0005575); nucleus (GO:0005634); apoptotic process (GO:0006915); biological_process (GO:0008150)	Fam188a	RefSeq	1.6138	1.6138	5.54443	8.59227	1.05568e-07	Male	class_I	IA
FAM222A	[TAD1101_chr5],[Plus]	chr5:115,018,259-115,063,227	NM_001004180			Fam222a	RefSeq	2.28339	2.28339	0.495734	1.0986	0.000203426	Male	class_I	IA
FAM47E	[TAD1069_chr5],[Plus],[Overlapping_Isoform_Count: 2]	chr5:93,000,562-93,020,310	NM_001033478 NM_001170571	family with sequence similarity 47, member E, protein FAM47E isoform 1;protein FAM47E isoform 2	molecular_function (GO:0003674); cellular_component (GO:0005575); biological_process (GO:0008150)	Fam47e	RefSeq	1.74627	1.74627	3.27295	5.49044	8.28911e-09	Male	no_response	none
FBXO21	[TAD1106_chr5],[Plus]	chr5:118,426,778-118,460,200	NM_145564	F-box protein 21, F-box only protein 21	molecular_function (GO:0003674); cellular_component (GO:0005575); obsolete ubiquitin cycle (GO:0006512); biological_process (GO:0008150)	Fbxo21	RefSeq	1.75242	1.75242	8.14175	13.7824	1.2318e-13	Male	class_II	IIB
FGF21	[TAD1436_chr7],[Minus]	chr7:52,869,259-52,870,860	NM_020013	Fibroblast growth factor 21, fibroblast growth factor 21 precursor	extracellular region (GO:0005576); extracellular space (GO:0005615); growth factor activity (GO:0008083); positive regulation of cell proliferation (GO:0008284); positive regulation of MAPKKK cascade by fibroblast growth factor receptor signaling pathway (GO:0090080)	Fgf21	RefSeq	3.08789	3.08789	0.39334	1.17531	0.000263721	Male	no_response	none
FITM1	[TAD2787_chr14],[Plus]	chr14:56,194,510-56,195,789	NM_026808	Fat storage-inducing transmembrane protein 1, fat storage-inducing transmembrane protein 1	endoplasmic reticulum (GO:0005783); endoplasmic reticulum membrane (GO:0005789); positive regulation of sequestering of triglyceride (GO:0010890); membrane (GO:0016020); integral component of membrane (GO:0016021); lipid particle organization (GO:0034389)	Fitm1	RefSeq	2.96135	2.96135	2.40701	6.91715	1.04246e-11	Male	class_II	IIA
FKBP11	[TAD2996_chr15],[Minus]	chr15:98,554,798-98,558,629	NM_024169	FK506 binding protein 11, peptidyl-prolyl cis-trans isomerase FKBP11 precursor	peptidyl-prolyl cis-trans isomerase activity (GO:0003755); extracellular space (GO:0005615); protein folding (GO:0006457); membrane (GO:0016020); integral component of membrane (GO:0016021); isomerase activity (GO:0016853)	Fkbp11	RefSeq	2.5526	2.5526	3.9953	9.72573	1.07528e-17	Male	class_I	IA
FMN2	[TAD226_chr1],[Plus]	chr1:176,431,955-176,752,860	NM_019445	Formin 2, formin-2	actin binding (GO:0003779); nucleus (GO:0005634); meiotic metaphase I (GO:0007132); multicellular organism development (GO:0007275); actin cytoskeleton (GO:0015629); cellular component organization (GO:0016043); meiotic chromosome movement towards spindle pole (GO:0016344); actin cytoskeleton organization (GO:0030036); polar body extrusion after meiotic divisions (GO:0040038); oogenesis (GO:00484…	Fmn2	RefSeq	3.77319	3.77319	0.175451	0.648344	4.49481e-18	Male	class_I	IA
FST	[TAD2717_chr13],[Minus],[Overlapping_Isoform_Count: 3]	chr13:115,242,469-115,249,159	NM_008046 NM_001301373 NM_001301375	Follistatin, follistatin isoform 2 precursor;follistatin FST288 precursor;follistatin FST315 precursor	extracellular region (GO:0005576); extracellular space (GO:0005615); gamete generation (GO:0007276); pattern specification process (GO:0007389); female gonad development (GO:0008585); BMP signaling pathway (GO:0030509); hair follicle morphogenesis (GO:0031069); odontogenesis of dentin-containing tooth (GO:0042475); heparan sulfate proteoglycan binding (GO:0043395); keratinocyte proliferation (GO:…	Fst	RefSeq	2.14532	2.14532	0.643793	1.31458	7.1291e-06	Male	class_II	IIB
GCNT4	[TAD2678_chr13],[Plus]	chr13:97,694,643-97,720,869	NM_001166065	glucosaminyl (N-acetyl) transferase 4, core 2 (beta-1,6-N-acetylglucosaminyltransferase), beta-1,3-galactosyl-O-glycosyl-glycoprotein beta-1,6-N-acetylglucosaminyltransferase 4		Gcnt4	RefSeq	1.51956	1.51956	0.524322	0.761391	0.0254211	Male	no_response	none
GDE1	[TAD1550_chr7],[Minus]	chr7:125,832,071-125,849,252	NM_019580	Glycerophosphodiester phosphodiesterase 1, glycerophosphodiester phosphodiesterase 1	protein binding (GO:0005515); extracellular space (GO:0005615); cytoplasm (GO:0005737); integral component of plasma membrane (GO:0005887); glycerol metabolic process (GO:0006071); lipid metabolic process (GO:0006629); G-protein coupled receptor signaling pathway (GO:0007186); phosphoric diester hydrolase activity (GO:0008081); glycerophosphodiester phosphodiesterase activity (GO:0008889); membra…	Gde1	RefSeq	1.59739	1.59739	7.18043	11.0662	8.17158e-08	Male	no_response	none
GDPD1	[TAD2309_chr11],[Minus]	chr11:86,847,295-86,887,639	NM_025638	Glycerophosphodiester phosphodiesterase domain containing 1, glycerophosphodiester phosphodiesterase domain-containing protein 1	molecular_function (GO:0003674); cellular_component (GO:0005575); extracellular space (GO:0005615); glycerol metabolic process (GO:0006071); lipid metabolic process (GO:0006629); phosphoric diester hydrolase activity (GO:0008081); biological_process (GO:0008150); glycerophosphodiester phosphodiesterase activity (GO:0008889); membrane (GO:0016020); integral component of membrane (GO:0016021); hydr…	Gdpd1	RefSeq	1.59459	1.59459	0.447794	0.682794	0.0411447	Male	no_response	none
GJC3	[TAD1136_chr5],[Minus]	chr5:138,395,036-138,404,187	NM_080450	Gap junction protein, gamma 3, gap junction gamma-3 protein	gap junction channel activity (GO:0005243); plasma membrane (GO:0005886); gap junction (GO:0005921); connexin complex (GO:0005922); cell communication (GO:0007154); cell-cell signaling (GO:0007267); sensory perception of sound (GO:0007605); membrane (GO:0016020); integral component of membrane (GO:0016021); cell junction (GO:0030054); myelination (GO:0042552); myelin sheath (GO:0043209); transmem…	Gjc3	RefSeq	1.72172	1.72172	0.42501	0.694647	0.00839338	Male	class_II	IIB
GLO1	[TAD3184_chr17],[Minus],[Overlapping_Isoform_Count: 2]	chr17:30,729,806-30,749,604	NM_001113560 NM_025374	Glyoxalase 1, lactoylglutathione lyase	lactoylglutathione lyase activity (GO:0004462); obsolete soluble fraction (GO:0005625); carbohydrate metabolic process (GO:0005975); glutathione metabolic process (GO:0006749); methylglyoxal metabolic process (GO:0009438); lyase activity (GO:0016829); metal ion binding (GO:0046872)	Glo1	RefSeq	1.55275	1.55275	131.039	196.203	3.01914e-08	Male	class_I	IA
GM10319	[TAD1352_chr6],[Plus]	chr6:122,086,645-122,100,976	NR_003624	predicted pseudogene 10319,		Gm10319	RefSeq	2.3704	2.3704	4.62707	10.618	3.23781e-19	Male	class_I	IA
GM10872	[TAD2962_chr15],[Minus]	chr15:76,097,216-76,100,269	NR_045747			Gm10872	RefSeq	3.53369	3.53369	0.152305	0.530021	0.000156297	Male	no_response	none
GM12070	[TAD2197_chr11],[Plus]	chr11:26,685,107-26,687,859	NR_002890	glyceraldehyde-3-phosphate dehydrogenase pseudogene,		Gm12070	RefSeq	1.51426	1.51426	0.935944	1.37887	0.023166	Male	class_II	IIB
GM12718	[TAD885_chr4],[Plus]	chr4:103,055,104-103,164,793	NR_040673			Gm12718	RefSeq	11.4639	11.4639	0.247479	2.69572	4.45373e-33	Male	class_I	IA
GM17821	[TAD2450_chr12],[Minus]	chr12:68,757,728-68,770,258	NR_033146			Gm17821	RefSeq	1.58318	1.58318	0.466661	0.719279	6.74523e-05	Male	class_II	IIB
GM20319	[TAD3049_chr16],[Minus]	chr16:26,714,767-26,755,588	NR_105063			Gm20319	RefSeq	1.64727	1.64727	10.1472	16.1355	1.30633e-07	Male	class_I	IA
GM2083	[TAD830_chr4],[Minus],[Overlaps with:Mup10;Mup11;Mup2],[Multi-counted reads: Whole_gene_body, Exon-only_counting, Intron-only_counting]	chr4:60,591,132-60,675,237	NM_001134644			Gm2083	RefSeq	3.65193	3.65193	2274.37	8009.22	5.23121e-40	Male	class_I	IB
GM4956	[TAD14_chr1],[Minus]	chr1:21,275,326-21,288,393	NR_002858	predicted gene 4956,		Gm4956	RefSeq	5.77579	5.77579	0.190702	1.11193	2.10222e-06	Male	no_response	none
GM5801	[TAD973_chr4end;TAD2788_chr14],[Both],[nonOverlapping_Isoform_Count: 2],[Overlaps with:Ube2j2],[Multi-counted reads: -, -, Intron-only_counting]	chr4:155,320,361-155,331,710 chr14:56,629,128-56,630,317	NR_002889	ubiquitin-conjugating enzyme E2, J2 homolog pseudogene,		Gm5801	RefSeq	2.69972	2.69972	0.130881	0.347194	0.000122265	Male	no_response	none
GM7694	[TAD217_chr1],[Minus]	chr1:172,228,323-172,236,463	NM_001198955	predicted gene 7694, uncharacterized protein C1orf226 homolog	molecular_function (GO:0003674); cellular_component (GO:0005575); biological_process (GO:0008150)	Gm7694	RefSeq	1.68723	1.68723	1.01419	1.6255	0.0109547	Male	class_II	IIB
GNA12	[TAD1142_chr5],[Minus]	chr5:141,235,897-141,306,385	NM_010302	Guanine nucleotide binding protein, alpha 12, guanine nucleotide-binding protein subunit alpha-12	nucleotide binding (GO:0000166); G-protein coupled receptor binding (GO:0001664); in utero embryonic development (GO:0001701); GTPase activity (GO:0003924); signal transducer activity (GO:0004871); GTP binding (GO:0005525); heterotrimeric G-protein complex (GO:0005834); brush border (GO:0005903); obsolete GTP catabolic process (GO:0006184); signal transduction (GO:0007165); G-protein coupled rece…	Gna12	RefSeq	1.51124	1.51124	11.6094	16.9472	1.50024e-05	Male	no_response	none
GNA14	[TAD3430_chr19],[Plus]	chr19:16,510,156-16,685,308	NM_008137	Guanine nucleotide binding protein, alpha 14, guanine nucleotide-binding protein subunit alpha-14	nucleotide binding (GO:0000166); GTPase activity (GO:0003924); signal transducer activity (GO:0004871); GTP binding (GO:0005525); heterotrimeric G-protein complex (GO:0005834); obsolete GTP catabolic process (GO:0006184); protein ADP-ribosylation (GO:0006471); signal transduction (GO:0007165); G-protein coupled receptor signaling pathway (GO:0007186); guanyl nucleotide binding (GO:0019001)	Gna14	RefSeq	1.88039	1.88039	0.84831	1.55819	0.00320947	Male	class_I	IA
GPC1	[TAD120_chr1],[Plus],[Overlaps with:Mir149]	chr1:94,728,262-94,756,773	NM_016696	Glypican 1, glypican-1 precursor	extracellular region (GO:0005576); (GO:0005578); extracellular space (GO:0005615); plasma membrane (GO:0005886); membrane (GO:0016020); anchored component of membrane (GO:0031225); heparan sulfate proteoglycan binding (GO:0043395)	Gpc1	RefSeq	1.82171	1.82171	0.383611	0.679739	9.24964e-05	Male	no_response	none
GPR110	[TAD3203_chr17],[Plus]	chr17:43,407,295-43,461,355	NM_133776	G protein-coupled receptor 110,	molecular_function (GO:0003674); signal transducer activity (GO:0004871); transmembrane signaling receptor activity (GO:0004888); G-protein coupled receptor activity (GO:0004930); cellular_component (GO:0005575); extracellular space (GO:0005615); plasma membrane (GO:0005886); signal transduction (GO:0007165); cell surface receptor signaling pathway (GO:0007166); G-protein coupled receptor signali…	Gpr110	RefSeq	2.16801	2.16801	0.627705	1.32422	2.75788e-10	Male	class_I	IA
GPR12	[TAD1160_chr5],[Minus],[Overlapping_Isoform_Count: 2]	chr5:147,393,725-147,395,980 chr5:147,393,725-147,396,815	NM_001010941 NM_008151	G-protein coupled receptor 12, G-protein coupled receptor 12	obsolete rhodopsin-like receptor activity (GO:0001584); obsolete lysosphingolipid and lysophosphatidic acid receptor activity (GO:0001619); signal transducer activity (GO:0004871); G-protein coupled receptor activity (GO:0004930); plasma membrane (GO:0005886); cellular calcium ion homeostasis (GO:0006874); signal transduction (GO:0007165); G-protein coupled receptor signaling pathway (GO:0007186)…	Gpr12	RefSeq	1.63006	1.63006	0.366747	0.594446	0.0430065	Male	class_I	IB
GPR98	[TAD2658_chr13],[Minus]	chr13:81,234,066-81,772,143	NM_054053	G protein-coupled receptor 98,	stereocilia ankle link complex (GO:0002142); signal transducer activity (GO:0004871); transmembrane signaling receptor activity (GO:0004888); G-protein coupled receptor activity (GO:0004930); calcium ion binding (GO:0005509); extracellular region (GO:0005576); plasma membrane (GO:0005886); polyamine biosynthetic process (GO:0006596); cell communication (GO:0007154); signal transduction (GO:000716…	Gpr98	RefSeq	10.1009	10.1009	0.0719426	0.694744	2.84459e-86	Male	class_I	IA
GREM2	[TAD227_chr1],[Minus]	chr1:176,763,915-176,851,950	NM_011825	Gremlin 2 homolog, cysteine knot superfamily (Xenopus laevis), gremlin-2 precursor	cytokine activity (GO:0005125); extracellular region (GO:0005576); extracellular space (GO:0005615)	Grem2	RefSeq	2.04196	2.04196	0.86043	1.71301	0.000833459	Male	class_II	IIA
GRHPR	[TAD805_chr4],[Plus]	chr4:44,994,282-45,003,568	NM_080289	Glyoxylate reductase/hydroxypyruvate reductase, glyoxylate reductase/hydroxypyruvate reductase isoform 2;glyoxylate reductase/hydroxypyruvate reductase isoform 1	catalytic activity (GO:0003824); binding (GO:0005488); cytosol (GO:0005829); L-serine biosynthetic process (GO:0006564); metabolic process (GO:0008152); glycerate dehydrogenase activity (GO:0008465); oxidoreductase activity (GO:0016491); oxidoreductase activity, acting on the CH-OH group of donors, NAD or NADP as acceptor (GO:0016616); hydroxypyruvate reductase activity (GO:0016618); glyoxylate r…	Grhpr	RefSeq	1.52736	1.52736	59.5082	87.6257	3.70395e-09	Male	no_response	none
GRM8	[TAD1192_chr6],[Minus],[Overlaps with:Mir592]	chr6:27,225,120-28,084,369	NM_008174	Glutamate receptor, metabotropic 8, metabotropic glutamate receptor 8 isoform 2 precursor;metabotropic glutamate receptor 8 isoform 1 precursor	group III metabotropic glutamate receptor activity (GO:0001642); signal transducer activity (GO:0004871); G-protein coupled receptor activity (GO:0004930); plasma membrane (GO:0005886); integral component of plasma membrane (GO:0005887); signal transduction (GO:0007165); G-protein coupled receptor signaling pathway (GO:0007186); adenylate cyclase-inhibiting G-protein coupled glutamate receptor si…	Grm8	RefSeq	1.72731	1.72731	0.847106	1.43085	0.00578739	Male	no_response	none
GSE1	[TAD1749_chr8],[Plus],[Overlapping_Isoform_Count: 3],[Overlaps with:Mir7687]	chr8:123,012,765-123,105,283 chr8:123,059,756-123,105,283 chr8:123,061,308-123,105,283	NM_198671 NM_001145897 NM_001145896	Genetic suppressor element 1, genetic suppressor element 1 isoform 3;genetic suppressor element 1 isoform 1;genetic suppressor element 1 isoform 2	molecular_function (GO:0003674); cellular_component (GO:0005575); biological_process (GO:0008150)	Gse1	RefSeq	1.50299	1.50299	1.35469	1.95845	3.29329e-06	Male	no_response	none
GSTA2	[TAD1900_chr9],[Minus]	chr9:78,178,826-78,194,952	NM_008182	Glutathione S-transferase, alpha 2 (Yc2), glutathione S-transferase A2	glutathione transferase activity (GO:0004364); nucleus (GO:0005634); nuclear outer membrane (GO:0005640); cytosol (GO:0005829); drug binding (GO:0008144); metabolic process (GO:0008152); transferase activity (GO:0016740); xenobiotic catabolic process (GO:0042178); glutathione binding (GO:0043295)	Gsta2	RefSeq	1.73347	1.73347	6.37935	10.6639	0.00593484	Male	class_II	IIB
GSTM3	[TAD694_chr3],[Minus]	chr3:107,766,613-107,772,092	NM_010359	Glutathione S-transferase, mu 3, glutathione S-transferase Mu 3	glutathione transferase activity (GO:0004364); cytoplasm (GO:0005737); metabolic process (GO:0008152); transferase activity (GO:0016740)	Gstm3	RefSeq	1.51492	1.51492	20.4686	29.9246	1.9038e-07	Male	class_I	IA
GSTP1	[TAD3407_chr19],[Minus]	chr19:4,035,410-4,037,912	NM_013541	Glutathione S-transferase, pi 1, glutathione S-transferase P 1	glutathione transferase activity (GO:0004364); glutathione metabolic process (GO:0006749); metabolic process (GO:0008152); transferase activity (GO:0016740)	Gstp1	RefSeq	7.99025	7.99025	82.8287	638.738	3.26818e-148	Male	class_I	IA
GSTP2	[TAD3407_chr19],[Minus]	chr19:4,040,287-4,042,221	NM_181796	Glutathione S-transferase, pi 2, glutathione S-transferase P 2	glutathione transferase activity (GO:0004364); nucleus (GO:0005634); cytoplasm (GO:0005737); cytosol (GO:0005829); plasma membrane (GO:0005886); glutathione metabolic process (GO:0006749); xenobiotic metabolic process (GO:0006805); drug binding (GO:0008144); metabolic process (GO:0008152); transferase activity (GO:0016740); glutathione binding (GO:0043295)	Gstp2	RefSeq	12.151	12.151	0.725951	8.44375	1.99948e-26	Male	class_I	IA
GTF2B	[TAD746_chr3],[Plus]	chr3:142,428,210-142,446,569	NM_145546	General transcription factor IIB, transcription initiation factor IIB	DNA binding (GO:0003677); DNA binding transcription factor activity (GO:0003700); translation initiation factor activity (GO:0003743); protein binding (GO:0005515); nucleus (GO:0005634); transcription factor complex (GO:0005667); DNA-templated transcription, initiation (GO:0006352); regulation of transcription, DNA-templated (GO:0006355); translational initiation (GO:0006413); biological_process …	Gtf2b	RefSeq	1.50574	1.50574	5.92323	8.59848	8.54123e-05	Male	no_response	none
GYS2	[TAD1390_chr6],[Minus]	chr6:142,371,132-142,421,629	NM_145572	Glycogen synthase 2, glycogen [starch] synthase, liver	catalytic activity (GO:0003824); glycogen (starch) synthase activity (GO:0004373); glucose binding (GO:0005536); obsolete soluble fraction (GO:0005625); obsolete insoluble fraction (GO:0005626); cytoplasm (GO:0005737); cytosol (GO:0005829); cytoskeleton (GO:0005856); cell cortex (GO:0005938); glycogen metabolic process (GO:0005977); glycogen biosynthetic process (GO:0005978); response to glucose …	Gys2	RefSeq	1.69725	1.69725	11.8887	19.4859	7.0442e-13	Male	class_II	IIB
H1FX	[TAD1293_chr6],[Minus]	chr6:87,930,414-87,931,476	NM_198622	H1 histone family, member X, H1 histone family, member X	molecular_function (GO:0003674); DNA binding (GO:0003677); cellular_component (GO:0005575); nucleus (GO:0005634); chromosome (GO:0005694); biological_process (GO:0008150)	H1fx	RefSeq	4.27019	4.27019	0.0661761	0.284562	0.00462648	Male	no_response	none
H6PD	[TAD967_chr4],[Minus],[Overlapping_Isoform_Count: 2]	chr4:149,353,582-149,383,132 chr4:149,353,582-149,377,345	NM_173371 NM_001291004	Hexose-6-phosphate dehydrogenase (glucose 1-dehydrogenase), GDH/6PGL endoplasmic bifunctional protein isoform 2 precursor;GDH/6PGL endoplasmic bifunctional protein isoform 1 precursor	catalytic activity (GO:0003824); glucose-6-phosphate dehydrogenase activity (GO:0004345); binding (GO:0005488); endoplasmic reticulum (GO:0005783); obsolete microsome (GO:0005792); carbohydrate metabolic process (GO:0005975); glucose metabolic process (GO:0006006); pentose-phosphate shunt (GO:0006098); NADP metabolic process (GO:0006739); metabolic process (GO:0008152); oxidoreductase activity (G…	H6pd	RefSeq	1.6564	1.6564	27.8493	44.4621	1.90498e-13	Male	no_response	none
HAO1	[TAD465_chr2],[Minus]	chr2:134,323,096-134,380,088	NM_010403	Hydroxyacid oxidase 1, liver, hydroxyacid oxidase 1	catalytic activity (GO:0003824); (S)-2-hydroxy-acid oxidase activity (GO:0003973); peroxisome (GO:0005777); obsolete electron transport (GO:0006118); metabolic process (GO:0008152); oxidative photosynthetic carbon pathway (GO:0009854); FMN binding (GO:0010181); oxidoreductase activity (GO:0016491); oxidation-reduction process (GO:0055114)	Hao1	RefSeq	1.6862	1.6862	52.8729	86.0023	1.16728e-12	Male	class_I	IB
HAUS4	[TAD2785_chr14],[Minus]	chr14:55,160,621-55,173,198	NM_145462	HAUS augmin-like complex, subunit 4, HAUS augmin-like complex subunit 4	molecular_function (GO:0003674); cellular_component (GO:0005575); cytoplasm (GO:0005737); cytoskeleton (GO:0005856); microtubule (GO:0005874); cell cycle (GO:0007049); biological_process (GO:0008150); cell division (GO:0051301)	Haus4	RefSeq	1.53507	1.53507	2.94209	4.35934	2.7161e-05	Male	no_response	none
HBA-A1	[TAD2209_chr11],[Plus],[nonOverlapping_Isoform_Count: 2],[Overlaps with:Hba-a2],[Multi-counted reads: Whole_gene_body, Exon-only_counting, Intron-only_counting]	chr11:32,196,488-32,197,303 chr11:32,183,671-32,184,486	NM_008218	Hemoglobin alpha, adult chain 1, hemoglobin subunit alpha	in utero embryonic development (GO:0001701); oxygen carrier activity (GO:0005344); binding (GO:0005488); iron ion binding (GO:0005506); mitochondrion (GO:0005739); hemoglobin complex (GO:0005833); transport (GO:0006810); oxygen transport (GO:0015671); oxygen binding (GO:0019825); heme binding (GO:0020037); metal ion binding (GO:0046872); erythrocyte development (GO:0048821)	Hba-a1	RefSeq	1.89571	1.89571	22.1222	40.5221	0.000801368	Male	class_I	IB
HBA-A2	[TAD2209_chr11],[Plus],[nonOverlapping_Isoform_Count: 2],[Overlaps with:Hba-a1],[Multi-counted reads: Whole_gene_body, Exon-only_counting, Intron-only_counting]	chr11:32,196,491-32,197,310 chr11:32,183,674-32,184,493	NM_001083955	hemoglobin alpha, adult chain 2, hemoglobin alpha, adult chain 2	amyloid-beta binding (GO:0001540); in utero embryonic development (GO:0001701); obsolete soluble fraction (GO:0005625); hemoglobin complex (GO:0005833); oxygen binding (GO:0019825); heme binding (GO:0020037); organic acid binding (GO:0043177); negative regulation of blood pressure (GO:0045776); erythrocyte development (GO:0048821); protein heterooligomerization (GO:0051291); regulation of sensory…	Hba-a2	RefSeq	1.89571	1.89571	21.965	40.2342	0.000801368	Male	class_I	IB
HBB-B1	[TAD1527_chr7],[Minus],[Overlaps with:Hbb-bs],[Multi-counted reads: Whole_gene_body, Exon-only_counting, Intron-only_counting]	chr7:110,975,045-110,976,443	NM_001278161	Hemoglobin, beta adult major chain, hemoglobin subunit beta-1	oxygen carrier activity (GO:0005344); iron ion binding (GO:0005506); hemoglobin complex (GO:0005833); transport (GO:0006810); regulation of eIF2 alpha phosphorylation by heme (GO:0010999); oxygen transport (GO:0015671); oxygen binding (GO:0019825); heme binding (GO:0020037); hemopoiesis (GO:0030097); metal ion binding (GO:0046872)	Hbb-b1	RefSeq	1.51743	1.51743	61.8894	90.6151	2.01343e-05	Male	no_response	none
HBB-BS	[TAD1527_chr7],[Minus],[Overlaps with:Hbb-b1],[Multi-counted reads: Whole_gene_body, Exon-only_counting, Intron-only_counting]	chr7:110,975,036-110,976,442	NM_001201391			Hbb-bs	RefSeq	1.51743	1.51743	61.1145	89.4806	2.01343e-05	Male	no_response	none
HC	[TAD321_chr2],[Minus]	chr2:34,838,850-34,916,961	NM_010406	Hemolytic complement, complement C5 preproprotein	in utero embryonic development (GO:0001701); leukocyte migration involved in inflammatory response (GO:0002523); endopeptidase inhibitor activity (GO:0004866); protein binding (GO:0005515); extracellular region (GO:0005576); membrane attack complex (GO:0005579); extracellular space (GO:0005615); obsolete soluble fraction (GO:0005625); cellular calcium ion homeostasis (GO:0006874); inflammatory re…	Hc	RefSeq	1.7596	1.7596	64.8886	109.981	3.98565e-11	Male	no_response	none
[truncated: 26,543 more rows]
