# Supplementary material for: Plasma growth hormone pulses induce male-biased pulsatile chromatin opening and epigenetic regulation in adult mouse liver
Source: eLife. 2023 Dec 13;12:RP91367. doi: 10.7554/eLife.91367 (PMC10721219; doi:10.7554/eLife.91367)
Supplement: Supplementary file 5. — (A) DHS peak summary and enrichment calculations summary for the sets of DNase-seq peaks discovered for the pituitary-intact male liver (STAT5-high and STAT5-low) samples and for the GH time-course mouse liver (hypophysectomized [hypox] and GH treated) samples. Each sheet (B–G) contains the peak union list generated from the respective data set and indicates a single overlapping DHS for each peak union site. Also shown is a summary of the enrichments shown in sheet I and presented in Figure 4D. (B–G) Shown for each indicated DHS set is the DHS overlap with the reference set of 70,211 DHS. Merged list of 70,767 DHS regions was generated based on the MACS2 peaks called for each DNase-seq replicate sample and assigned a unique name (DHS Peak Number, column E). The genomic position of the DHS region is listed in columns A–C, its DHS response in column D, and its overlap with the reference set of 70,211 DHS is shown in columns (F–I). The number of overlapping base pairs is provided in column J; values of zero indicate lack of overlap between DHS regions. (H) Responsiveness of sex-biased DHS classes to hypox in male and in female mouse liver. DHS counts are based on sex-biased DHS classifications in Supplementary file 1A, column I, and hypophysectomy response data summarized in columns AI–AJ of that sheet. No DHS overlap indicates that the indicated male or female hypox dataset does not contain the indicated number of DHS from the standard reference set of 70,211 liver DHS listed in Supplementary file 1A. For example, 19 of 834 dynamic male-biased DHS and 454 of 1895 static male-biased DHS are absent from the male hypox DHS dataset used for these analyses. Those DHS were excluded when calculating the percentage values shown in columns C, E, G, etc. (I) Hypophysectomy enrichments of DHS regions. [file elife-91367-supp5.xlsx]

## Sheet: 5A_DHS Summary
Supplementary File 5A. DHS Peak Summary and enrichment calculations summary – Sets of DNase-seq peaks discovered for the pituitary-intact male liver (STAT5-high and STAT5-low) samples and the GH time-course mouse liver (hypophysectomized (hypox) and GH treated) samples. Each sheet (5B-5G) contains the peak union list (see Methods) generated from the respective data set and indicates a single over…
Suppl File 5 sheet # with detailed peak listing	DHS Comparison	Total number of peak union sites	Number of diffReps differential DHS regions		Number of differential DHS regions that overlap the set of 70,211 DHS
	(DNase-seq in male liver)		DHS that open	DHS that close	DHS that open	DHS that close	Static DHS (sDHS)
5B	STAT5-high/ STAT5-low	70767	2832	123	2373	98	45754
Male hypophysectomy = MHx
Female hypophysectomy = FHx
Suppl File 5 sheet # with detailed peak listing	DHS Comparison	Total number of peak union sites	Number of diffReps differential DHS regions		Number of differential DHS regions that overlap the set of 70,211 DHS
			sites that open	sites that close	DHS that open	DHS that close	Static DHS
5C	MHx/Male Control	57053	2142	4856	1709	4147	35562
5D	FHx/Female Control	43287	3444	2753	2624	2477	30394
5E	MHx+GH 30 min/ MHx	33241	4243	1113	3589	736	23614
5F	MHx+GH 90 min/ MHx	33593	3829	1646	3241	1214	23570
5G	MHx+GH 240 min/ MHx	33563	2040	777	1825	500	26118
Summary of enrichments shown in sheet 5I:
	DHS closing in Male Hx liver (Male Hypox/Male control)		DHS closing in Female Hx liver (Female Hypox/Female control)		DHS opening in Male Hx liver (Male Hypox/Male control)		DHS opening in Female Hx liver (Female Hypox/Female control)
	Enrchment score and adj P-value for chromatin closing				Enrchment score and adj P-value for chromatin opening
Male class I	5.7	1.27e-69	3.9	1.692e-21	0.3	0.0009552	0.3	6.03e-08
Female class I	2.9	4.05e-11	7.8	6.64e-46	0.9	0.883	0.2	3.38e-06
Male class II	1.3	0.222	0.7	0.435	1.7	0.0562	1.9	0.000483429
Female class II	1.3	0.165333	1.3	0.145091	3.6	1.804e-15	0.6	0.0202667
	# genes down: Male Hypox	percentage	# genes down: Female Hypox	percentage	# genes up: Male Hypox	percentage	# genes up: Female Hypox	percentage
Male class I	202	1	89	0.440594	0	0	3	0.0148515
Female class I	35	0.261194	134	1	9	0.0671642	0	0
Male class II	0	0	0	0	40	0.444444	90	1
Female class II	0	0	0	0	178	1	70	0.393258
Data from Fig. 4-figure supplement 1: Classification of Pituitary Hormone-Dependent Sex-Biased Genes
Class	Number of Genes (%)	Response to MHx	Response to FHx	Gene Subclass	Number of Genes
Male class I	202 (69)	Down	-	IA	110
		Down	Down	IB	89
		Down	Up	IC	3
Male class II	90 (31)	-	Up	IIA	50
		Up	Up	IIB	40
Female class I	134 (43)	-	Down	IA	90
		Down	Down	IB	35
		Up	Down	IC	9
Female class II	178 (57)	Up	-	IIA	108
		Up	Up	IIB	70

## Sheet: 5B_STAT5_high vs low
Supplementary File 5B - STAT5-high/STAT5-low male liver DHS overlap with the set of 70,211 DHS. Merged list of 70,767 DHS regions was generated based on the MACS2 peaks called in each DNase-seq replicate sample (see Methods) and assigned a unique name (DHS Peak Number, column E). The genomic position of DHS region is listed in columns A-C, its DHS response in column D, and its overlapping DHS reg…
DHS Peaks (n = 70,767): 2832 STAT5_hi_dDHS; 123 STAT5_lo_dDHS; 67,812 STAT5_sDHS					DHS regions (from reference set of 70,211 DHS)				The number of overlapping base pairs between the DHS regions.
Chrom	Start	End	DHS Response	DHS Peak Number	Chr	Start	Stop	DHS Peak Number	bp_overlap
chr1	4504061	4504700	STAT5_hi_dDHS	Peak_14	chr1	4504003	4504564	11	503
chr1	4660781	4661180	STAT5_hi_dDHS	Peak_21	chr1	4660743	4661047	16	266
chr1	5124201	5124600	STAT5_hi_dDHS	Peak_38	chr1	5124248	5124548	32	300
chr1	8044681	8045440	STAT5_hi_dDHS	Peak_64	chr1	8044741	8045168	41	427
chr1	9921701	9922360	STAT5_hi_dDHS	Peak_106	chr1	9921976	9922233	72	257
chr1	9937621	9938280	STAT5_hi_dDHS	Peak_108	chr1	9937477	9938082	76	461
chr1	10594201	10594700	STAT5_hi_dDHS	Peak_127	chr1	10594304	10594480	90	176
chr1	13105541	13106080	STAT5_hi_dDHS	Peak_138	chr1	13105724	13105984	99	260
chr1	13456961	13457740	STAT5_hi_dDHS	Peak_159	chr1	13456977	13457583	117	606
chr1	13797521	13797880	STAT5_hi_dDHS	Peak_187	chr1	13797774	13798111	142	106
chr1	16261781	16262400	STAT5_hi_dDHS	Peak_215	.	-1	-1	.	0
chr1	20059741	20060480	STAT5_hi_dDHS	Peak_238	chr1	20059807	20060228	173	421
chr1	21092721	21093340	STAT5_hi_dDHS	Peak_260	chr1	21092729	21093192	196	463
chr1	21114981	21115660	STAT5_hi_dDHS	Peak_261	chr1	21114931	21115521	197	540
chr1	21242981	21243440	STAT5_hi_dDHS	Peak_270	chr1	21242798	21243392	217	411
chr1	22917521	22918380	STAT5_hi_dDHS	Peak_292	.	-1	-1	.	0
chr1	23321581	23322060	STAT5_hi_dDHS	Peak_312	chr1	23321642	23321810	256	168
chr1	23327601	23327960	STAT5_hi_dDHS	Peak_313	chr1	23327479	23328729	257	359
chr1	23487581	23488320	STAT5_hi_dDHS	Peak_317	chr1	23487714	23488167	260	453
chr1	23491281	23492240	STAT5_hi_dDHS	Peak_318	chr1	23491439	23491893	261	454
chr1	24114641	24115240	STAT5_hi_dDHS	Peak_331	chr1	24114225	24115555	266	599
chr1	31075961	31076760	STAT5_hi_dDHS	Peak_363	chr1	31076037	31076875	291	723
chr1	31090541	31091400	STAT5_hi_dDHS	Peak_364	chr1	31090628	31091252	292	624
chr1	31151481	31152180	STAT5_hi_dDHS	Peak_368	chr1	31150634	31152167	296	686
chr1	31210541	31211220	STAT5_hi_dDHS	Peak_371	chr1	31210752	31211185	300	433
chr1	34224261	34224760	STAT5_hi_dDHS	Peak_401	chr1	34224374	34224812	321	386
chr1	34294101	34294760	STAT5_hi_dDHS	Peak_404	chr1	34294006	34295431	324	659
chr1	35982921	35983780	STAT5_hi_dDHS	Peak_435	chr1	35982623	35984183	360	859
chr1	35990281	35990880	STAT5_hi_dDHS	Peak_436	chr1	35990272	35990824	362	543
chr1	36150341	36150980	STAT5_hi_dDHS	Peak_449	chr1	36150424	36150944	378	520
chr1	37404201	37404800	STAT5_hi_dDHS	Peak_518	chr1	37404152	37404680	453	479
chr1	38506241	38506820	STAT5_hi_dDHS	Peak_547	chr1	38506302	38506656	475	354
chr1	40220181	40221300	STAT5_hi_dDHS	Peak_619	chr1	40219922	40220754	542	573
chr1	40228601	40229460	STAT5_hi_dDHS	Peak_620	chr1	40228680	40229412	545	732
chr1	40231801	40232300	STAT5_hi_dDHS	Peak_622	chr1	40231732	40233173	546	499
chr1	40244601	40245420	STAT5_hi_dDHS	Peak_625	chr1	40244687	40245231	549	544
chr1	40284301	40285080	STAT5_hi_dDHS	Peak_630	chr1	40284598	40285212	557	482
chr1	40293401	40294320	STAT5_hi_dDHS	Peak_632	chr1	40293477	40294208	560	731
chr1	40299301	40300260	STAT5_hi_dDHS	Peak_633	chr1	40299557	40299948	561	391
chr1	41608101	41609220	STAT5_hi_dDHS	Peak_647	chr1	41608251	41608848	572	597
chr1	41612201	41613220	STAT5_hi_dDHS	Peak_648	chr1	41612445	41613149	573	704
chr1	41615901	41616580	STAT5_hi_dDHS	Peak_649	chr1	41615911	41616549	574	638
chr1	42798261	42798860	STAT5_hi_dDHS	Peak_660	chr1	42798407	42798953	581	453
chr1	49627641	49628340	STAT5_hi_dDHS	Peak_736	chr1	49627788	49628116	637	328
chr1	49629241	49629900	STAT5_hi_dDHS	Peak_737	chr1	49629448	49629745	638	297
chr1	51970841	51971440	STAT5_hi_dDHS	Peak_780	.	-1	-1	.	0
chr1	52558461	52558980	STAT5_hi_dDHS	Peak_804	chr1	52558596	52558903	695	307
chr1	52861881	52862380	STAT5_hi_dDHS	Peak_816	chr1	52861878	52862213	702	332
chr1	54671661	54672380	STAT5_hi_dDHS	Peak_854	chr1	54671523	54672339	728	678
chr1	55040241	55040800	STAT5_hi_dDHS	Peak_874	chr1	55040221	55040775	748	534
chr1	55136481	55137120	STAT5_hi_dDHS	Peak_880	chr1	55136533	55136946	753	413
chr1	55149181	55149640	STAT5_hi_dDHS	Peak_883	.	-1	-1	.	0
chr1	58128421	58129320	STAT5_hi_dDHS	Peak_937	chr1	58127850	58129112	794	691
chr1	58666881	58667920	STAT5_hi_dDHS	Peak_971	chr1	58667041	58667837	832	796
chr1	59008001	59008580	STAT5_hi_dDHS	Peak_987	chr1	59008169	59008468	853	299
chr1	59258081	59258920	STAT5_hi_dDHS	Peak_999	chr1	59257841	59258818	863	737
chr1	59544121	59544720	STAT5_hi_dDHS	Peak_1024	chr1	59544125	59544759	891	595
chr1	59559441	59559820	STAT5_hi_dDHS	Peak_1026	.	-1	-1	.	0
chr1	60609041	60609560	STAT5_hi_dDHS	Peak_1054	.	-1	-1	.	0
chr1	60878221	60878840	STAT5_hi_dDHS	Peak_1079	chr1	60878279	60878802	941	523
chr1	60883601	60884360	STAT5_hi_dDHS	Peak_1081	chr1	60883708	60884595	944	652
chr1	60890441	60890900	STAT5_hi_dDHS	Peak_1083	.	-1	-1	.	0
chr1	60903641	60904200	STAT5_hi_dDHS	Peak_1084	chr1	60903648	60904111	946	463
chr1	62945901	62946480	STAT5_hi_dDHS	Peak_1134	chr1	62946003	62946260	997	257
chr1	65452001	65452660	STAT5_hi_dDHS	Peak_1216	chr1	65452205	65452552	1066	347
chr1	65453841	65454680	STAT5_hi_dDHS	Peak_1217	chr1	65454023	65454407	1067	384
chr1	67164241	67165080	STAT5_hi_dDHS	Peak_1256	chr1	67164361	67164789	1102	428
chr1	69940761	69941500	STAT5_hi_dDHS	Peak_1279	chr1	69940904	69941368	1167	464
chr1	71770161	71770880	STAT5_hi_dDHS	Peak_1308	chr1	71770379	71770827	1202	448
chr1	71854021	71855200	STAT5_hi_dDHS	Peak_1314	chr1	71854220	71854482	1205	262
chr1	71920641	71921020	STAT5_hi_dDHS	Peak_1319	chr1	71920724	71920968	1209	244
chr1	72078821	72079440	STAT5_hi_dDHS	Peak_1337	chr1	72078794	72079219	1222	398
chr1	75061701	75061980	STAT5_hi_dDHS	Peak_1490	chr1	75061773	75062028	1399	207
chr1	75334081	75334980	STAT5_hi_dDHS	Peak_1511	chr1	75334324	75334511	1437	187
chr1	76915141	76915720	STAT5_hi_dDHS	Peak_1540	chr1	76915581	76916605	1456	139
chr1	82154721	82155660	STAT5_hi_dDHS	Peak_1617	chr1	82154931	82155388	1500	457
chr1	82231181	82232120	STAT5_hi_dDHS	Peak_1623	chr1	82231138	82232011	1507	830
chr1	82784021	82784420	STAT5_hi_dDHS	Peak_1636	chr1	82784025	82784372	1527	347
chr1	83896741	83897400	STAT5_hi_dDHS	Peak_1647	chr1	83896719	83897207	1533	466
chr1	83903241	83904180	STAT5_hi_dDHS	Peak_1648	chr1	83903348	83903989	1534	641
chr1	84296161	84296740	STAT5_hi_dDHS	Peak_1662	.	-1	-1	.	0
chr1	88394421	88394980	STAT5_hi_dDHS	Peak_1736	chr1	88393815	88395016	1612	559
chr1	89660361	89660960	STAT5_hi_dDHS	Peak_1800	chr1	89660287	89660946	1667	585
chr1	89920621	89921120	STAT5_hi_dDHS	Peak_1822	chr1	89920742	89921081	1690	339
chr1	90645541	90646100	STAT5_hi_dDHS	Peak_1880	chr1	90645631	90646032	1763	401
chr1	91566181	91566500	STAT5_hi_dDHS	Peak_1916	chr1	91566329	91567309	1791	171
chr1	93141481	93142080	STAT5_hi_dDHS	Peak_1955	chr1	93141541	93142062	1842	521
chr1	94798061	94798460	STAT5_hi_dDHS	Peak_2019	chr1	94798020	94798718	1916	399
chr1	94840381	94841040	STAT5_hi_dDHS	Peak_2024	chr1	94840029	94840825	1930	444
chr1	99667481	99667960	STAT5_hi_dDHS	Peak_2098	chr1	99667745	99668003	1997	215
chr1	102194661	102195500	STAT5_hi_dDHS	Peak_2114	.	-1	-1	.	0
chr1	102307061	102307640	STAT5_hi_dDHS	Peak_2117	chr1	102307132	102307618	2006	486
chr1	102448441	102449000	STAT5_hi_dDHS	Peak_2122	chr1	102448557	102449007	2010	443
chr1	104414581	104414900	STAT5_hi_dDHS	Peak_2130	chr1	104414563	104414966	2013	319
chr1	107821821	107822960	STAT5_hi_dDHS	Peak_2173	chr1	107821386	107822733	2039	912
chr1	109836021	109836600	STAT5_hi_dDHS	Peak_2227	chr1	109836279	109836523	2086	244
chr1	120265721	120266180	STAT5_hi_dDHS	Peak_2255	chr1	120265692	120266170	2101	449
chr1	120377521	120378380	STAT5_hi_dDHS	Peak_2261	chr1	120377825	120378212	2106	387
chr1	122032921	122033400	STAT5_hi_dDHS	Peak_2334	.	-1	-1	.	0
chr1	122551421	122552200	STAT5_hi_dDHS	Peak_2349	chr1	122551396	122552160	2193	739
chr1	124582101	124582640	STAT5_hi_dDHS	Peak_2370	.	-1	-1	.	0
chr1	125965301	125966040	STAT5_hi_dDHS	Peak_2372	chr1	125965441	125965652	2213	211
chr1	127864261	127864900	STAT5_hi_dDHS	Peak_2395	chr1	127864363	127864859	2231	496
chr1	128568941	128569320	STAT5_hi_dDHS	Peak_2406	.	-1	-1	.	0
chr1	129251541	129252600	STAT5_hi_dDHS	Peak_2421	chr1	129251643	129252599	2250	956
chr1	129504941	129505340	STAT5_hi_dDHS	Peak_2431	.	-1	-1	.	0
chr1	129795721	129796440	STAT5_hi_dDHS	Peak_2445	chr1	129796083	129796418	2267	335
chr1	132636341	132636860	STAT5_hi_dDHS	Peak_2502	.	-1	-1	.	0
chr1	133374901	133375680	STAT5_hi_dDHS	Peak_2558	chr1	133375468	133375589	2395	121
chr1	133814161	133814840	STAT5_hi_dDHS	Peak_2586	chr1	133814106	133814581	2428	420
chr1	133818581	133819140	STAT5_hi_dDHS	Peak_2588	chr1	133818655	133818983	2430	328
chr1	133837401	133838000	STAT5_hi_dDHS	Peak_2591	chr1	133837634	133838008	2433	366
chr1	133886741	133887520	STAT5_hi_dDHS	Peak_2600	chr1	133886471	133887479	2447	738
chr1	133907241	133907600	STAT5_hi_dDHS	Peak_2605	.	-1	-1	.	0
chr1	134544421	134545160	STAT5_hi_dDHS	Peak_2644	chr1	134544514	134545002	2503	488
chr1	135119061	135119760	STAT5_hi_dDHS	Peak_2672	chr1	135119095	135119647	2531	552
chr1	135545421	135545800	STAT5_hi_dDHS	Peak_2712	.	-1	-1	.	0
chr1	136471481	136471920	STAT5_hi_dDHS	Peak_2784	.	-1	-1	.	0
chr1	138428021	138428360	STAT5_hi_dDHS	Peak_2846	chr1	138427943	138428375	2738	339
chr1	138790101	138790660	STAT5_hi_dDHS	Peak_2883	.	-1	-1	.	0
chr1	138851501	138852260	STAT5_hi_dDHS	Peak_2898	chr1	138851543	138852164	2787	621
chr1	139114921	139115300	STAT5_hi_dDHS	Peak_2915	.	-1	-1	.	0
chr1	139176821	139177300	STAT5_hi_dDHS	Peak_2917	.	-1	-1	.	0
chr1	140503041	140503940	STAT5_hi_dDHS	Peak_2937	chr1	140503240	140503755	2811	515
chr1	140808661	140809200	STAT5_hi_dDHS	Peak_2947	chr1	140808835	140809258	2818	365
chr1	140809421	140810460	STAT5_hi_dDHS	Peak_2948	chr1	140809570	140810405	2819	835
chr1	142277201	142278400	STAT5_hi_dDHS	Peak_2988	chr1	142277435	142278281	2858	846
chr1	142303161	142304860	STAT5_hi_dDHS	Peak_2989	chr1	142303018	142303837	2859	676
chr1	142311781	142312940	STAT5_hi_dDHS	Peak_2991	chr1	142312040	142312749	2861	709
chr1	142407441	142407940	STAT5_hi_dDHS	Peak_2995	.	-1	-1	.	0
chr1	142466321	142466720	STAT5_hi_dDHS	Peak_2999	.	-1	-1	.	0
chr1	152305981	152306560	STAT5_hi_dDHS	Peak_3036	chr1	152306109	152306449	2880	340
chr1	152306661	152307320	STAT5_hi_dDHS	Peak_3037	.	-1	-1	.	0
chr1	152324961	152325380	STAT5_hi_dDHS	Peak_3039	.	-1	-1	.	0
chr1	153005261	153005740	STAT5_hi_dDHS	Peak_3065	chr1	153005209	153005691	2908	430
chr1	155271961	155272340	STAT5_hi_dDHS	Peak_3159	.	-1	-1	.	0
chr1	155328441	155329040	STAT5_hi_dDHS	Peak_3160	chr1	155328696	155329216	2991	344
chr1	155406821	155407220	STAT5_hi_dDHS	Peak_3167	chr1	155406838	155407132	2995	294
chr1	155536661	155537180	STAT5_hi_dDHS	Peak_3174	chr1	155536815	155537205	3000	365
chr1	156098301	156098980	STAT5_hi_dDHS	Peak_3214	chr1	156098356	156098801	3038	445
chr1	157475001	157475380	STAT5_hi_dDHS	Peak_3261	chr1	157474943	157475210	3075	209
chr1	157641741	157643660	STAT5_hi_dDHS	Peak_3263	chr1	157641428	157643381	3079	1640
chr1	157656681	157657580	STAT5_hi_dDHS	Peak_3266	chr1	157656755	157657573	3083	818
chr1	157673001	157674520	STAT5_hi_dDHS	Peak_3268	chr1	157673715	157674649	3086	805
chr1	159183981	159184900	STAT5_hi_dDHS	Peak_3328	chr1	159184147	159184770	3137	623
chr1	160643721	160644140	STAT5_hi_dDHS	Peak_3354	chr1	160643589	160644392	3164	419
chr1	160860821	160862380	STAT5_hi_dDHS	Peak_3359	chr1	160860969	160862478	3166	1411
chr1	162303541	162303880	STAT5_hi_dDHS	Peak_3378	chr1	162303548	162303807	3184	259
chr1	164791901	164792480	STAT5_hi_dDHS	Peak_3463	chr1	164792049	164792328	3266	279
chr1	164793561	164794220	STAT5_hi_dDHS	Peak_3464	chr1	164793812	164794077	3267	265
chr1	164821861	164822800	STAT5_hi_dDHS	Peak_3473	chr1	164822014	164822651	3278	637
chr1	164827681	164828300	STAT5_hi_dDHS	Peak_3474	.	-1	-1	.	0
chr1	164896221	164896900	STAT5_hi_dDHS	Peak_3477	chr1	164896220	164897116	3283	679
chr1	164916261	164917840	STAT5_hi_dDHS	Peak_3479	chr1	164915999	164917338	3288	1077
chr1	165748281	165748580	STAT5_hi_dDHS	Peak_3489	chr1	165748243	165748500	3298	219
chr1	166166041	166166560	STAT5_hi_dDHS	Peak_3512	chr1	166166210	166166505	3317	295
chr1	166251421	166252160	STAT5_hi_dDHS	Peak_3520	chr1	166251542	166251959	3325	417
chr1	166456301	166456820	STAT5_hi_dDHS	Peak_3536	chr1	166456786	166457248	3345	34
chr1	167051161	167051660	STAT5_hi_dDHS	Peak_3554	chr1	167050585	167051476	3356	315
chr1	168196181	168196400	STAT5_hi_dDHS	Peak_3614	chr1	168196245	168196776	3417	155
chr1	168208681	168209540	STAT5_hi_dDHS	Peak_3615	chr1	168208723	168209357	3418	634
chr1	168209641	168210480	STAT5_hi_dDHS	Peak_3616	chr1	168209699	168210449	3419	750
chr1	168210521	168211040	STAT5_hi_dDHS	Peak_3617	chr1	168210613	168212084	3420	427
chr1	168211381	168212040	STAT5_hi_dDHS	Peak_3618	chr1	168210613	168212084	3420	659
chr1	169177141	169177640	STAT5_hi_dDHS	Peak_3630	chr1	169177147	169177558	3430	411
chr1	170292461	170293160	STAT5_hi_dDHS	Peak_3671	chr1	170292489	170293040	3468	551
chr1	171196541	171196980	STAT5_hi_dDHS	Peak_3694	.	-1	-1	.	0
chr1	172352301	172352840	STAT5_hi_dDHS	Peak_3723	chr1	172352438	172352768	3512	330
chr1	172358001	172358640	STAT5_hi_dDHS	Peak_3724	chr1	172358159	172358655	3513	481
chr1	172386841	172387100	STAT5_hi_dDHS	Peak_3727	chr1	172386383	172386944	3516	103
chr1	174585421	174585720	STAT5_hi_dDHS	Peak_3885	chr1	174585446	174585853	3670	274
chr1	174823001	174823380	STAT5_hi_dDHS	Peak_3891	.	-1	-1	.	0
chr1	174824881	174825440	STAT5_hi_dDHS	Peak_3893	chr1	174824933	174825885	3678	507
chr1	174825541	174825900	STAT5_hi_dDHS	Peak_3894	chr1	174824933	174825885	3678	344
chr1	174833361	174834000	STAT5_hi_dDHS	Peak_3895	chr1	174833539	174833813	3679	274
chr1	174859721	174860700	STAT5_hi_dDHS	Peak_3896	chr1	174860030	174860572	3680	542
chr1	174861241	174863040	STAT5_hi_dDHS	Peak_3897	chr1	174861422	174861937	3681	515
chr1	176419861	176420360	STAT5_hi_dDHS	Peak_3904	chr1	176420085	176420403	3691	275
chr1	176695321	176696240	STAT5_hi_dDHS	Peak_3913	chr1	176695461	176696144	3698	683
chr1	176696541	176697480	STAT5_hi_dDHS	Peak_3914	chr1	176696608	176697356	3699	748
chr1	176836161	176836720	STAT5_hi_dDHS	Peak_3918	chr1	176836187	176836606	3705	419
chr1	176850261	176851100	STAT5_hi_dDHS	Peak_3920	chr1	176850262	176850928	3707	666
chr1	177553901	177554160	STAT5_hi_dDHS	Peak_3933	chr1	177553728	177554151	3718	250
chr1	179641001	179641820	STAT5_hi_dDHS	Peak_3970	chr1	179641079	179641684	3745	605
chr1	184120121	184120660	STAT5_hi_dDHS	Peak_4141	chr1	184120166	184120667	3936	494
chr1	188149341	188149980	STAT5_hi_dDHS	Peak_4283	chr1	188149410	188149823	4101	413
chr1	188232861	188233080	STAT5_hi_dDHS	Peak_4288	chr1	188232863	188233395	4105	217
chr1	188609161	188609660	STAT5_hi_dDHS	Peak_4299	chr1	188609199	188609638	4114	439
chr1	189068541	189069100	STAT5_hi_dDHS	Peak_4315	chr1	189068611	189069189	4123	489
chr1	191880821	191881080	STAT5_hi_dDHS	Peak_4378	chr1	191880718	191881286	4189	259
chr1	191935341	191936080	STAT5_hi_dDHS	Peak_4383	chr1	191935406	191935945	4194	539
chr1	193411241	193411840	STAT5_hi_dDHS	Peak_4462	chr1	193411552	193411761	4287	209
chr1	193412501	193413180	STAT5_hi_dDHS	Peak_4463	chr1	193412687	193413024	4288	337
chr1	193452261	193453060	STAT5_hi_dDHS	Peak_4466	chr1	193452369	193453181	4289	691
chr10	5564241	5564440	STAT5_hi_dDHS	Peak_4664	.	-1	-1	.	0
chr10	5612181	5612740	STAT5_hi_dDHS	Peak_4668	chr10	5612197	5612493	4467	296
chr10	5612761	5613360	STAT5_hi_dDHS	Peak_4669	chr10	5612897	5613269	4468	372
chr10	5616641	5617140	STAT5_hi_dDHS	Peak_4670	.	-1	-1	.	0
chr10	5724721	5725560	STAT5_hi_dDHS	Peak_4681	chr10	5724640	5725785	4474	839
chr10	5728061	5728920	STAT5_hi_dDHS	Peak_4683	chr10	5728314	5728809	4476	495
chr10	5756461	5757000	STAT5_hi_dDHS	Peak_4688	chr10	5756550	5757003	4484	450
chr10	6304261	6304960	STAT5_hi_dDHS	Peak_4706	chr10	6304482	6304786	4500	304
chr10	8361961	8362760	STAT5_hi_dDHS	Peak_4776	chr10	8362149	8362393	4557	244
chr10	8377961	8378780	STAT5_hi_dDHS	Peak_4778	chr10	8378043	8378580	4559	537
chr10	8537661	8538420	STAT5_hi_dDHS	Peak_4788	chr10	8537721	8538511	4572	699
chr10	8670641	8671700	STAT5_hi_dDHS	Peak_4804	chr10	8670535	8671584	4594	943
chr10	8702461	8703060	STAT5_hi_dDHS	Peak_4805	chr10	8702652	8703566	4596	408
chr10	8794521	8795160	STAT5_hi_dDHS	Peak_4807	.	-1	-1	.	0
chr10	10565001	10565240	STAT5_hi_dDHS	Peak_4836	chr10	10564874	10565236	4614	235
chr10	10566421	10566960	STAT5_hi_dDHS	Peak_4837	chr10	10566571	10566952	4615	381
chr10	13588021	13588460	STAT5_hi_dDHS	Peak_4889	chr10	13588002	13589066	4658	439
chr10	13589281	13589860	STAT5_hi_dDHS	Peak_4890	.	-1	-1	.	0
chr10	13750361	13750780	STAT5_hi_dDHS	Peak_4896	chr10	13750441	13750735	4665	294
chr10	16931701	16932160	STAT5_hi_dDHS	Peak_4931	.	-1	-1	.	0
chr10	17241681	17242340	STAT5_hi_dDHS	Peak_4946	chr10	17241799	17242341	4689	541
chr10	17723861	17724580	STAT5_hi_dDHS	Peak_4972	chr10	17723930	17724434	4715	504
chr10	18086381	18087260	STAT5_hi_dDHS	Peak_4986	chr10	18086628	18087117	4730	489
chr10	18806941	18807360	STAT5_hi_dDHS	Peak_5013	chr10	18806421	18807251	4754	310
chr10	19251221	19251640	STAT5_hi_dDHS	Peak_5031	.	-1	-1	.	0
chr10	19252481	19252980	STAT5_hi_dDHS	Peak_5032	.	-1	-1	.	0
chr10	20328421	20328760	STAT5_hi_dDHS	Peak_5097	.	-1	-1	.	0
chr10	23473341	23474600	STAT5_hi_dDHS	Peak_5192	chr10	23473441	23474390	4912	949
chr10	23561701	23562000	STAT5_hi_dDHS	Peak_5197	.	-1	-1	.	0
chr10	23582301	23582680	STAT5_hi_dDHS	Peak_5199	chr10	23582458	23582806	4922	222
chr10	23643661	23644360	STAT5_hi_dDHS	Peak_5207	chr10	23643795	23644118	4928	323
chr10	23974701	23974940	STAT5_hi_dDHS	Peak_5218	chr10	23974627	23975026	4937	239
chr10	24081081	24081600	STAT5_hi_dDHS	Peak_5225	chr10	24081245	24081565	4940	320
chr10	24082261	24082840	STAT5_hi_dDHS	Peak_5226	chr10	24082381	24082599	4941	218
chr10	25339341	25339920	STAT5_hi_dDHS	Peak_5286	chr10	25339115	25339893	5008	552
chr10	26715601	26716080	STAT5_hi_dDHS	Peak_5310	chr10	26715477	26715974	5027	373
chr10	26732701	26733360	STAT5_hi_dDHS	Peak_5311	chr10	26732784	26733262	5028	478
chr10	26859481	26860040	STAT5_hi_dDHS	Peak_5316	.	-1	-1	.	0
chr10	33536501	33537120	STAT5_hi_dDHS	Peak_5409	chr10	33536765	33537309	5090	355
chr10	40047541	40048440	STAT5_hi_dDHS	Peak_5537	chr10	40047665	40048664	5202	775
chr10	41296041	41296840	STAT5_hi_dDHS	Peak_5578	chr10	41296028	41296659	5229	618
chr10	41429021	41429640	STAT5_hi_dDHS	Peak_5590	chr10	41429114	41429656	5238	526
chr10	42428821	42429320	STAT5_hi_dDHS	Peak_5634	.	-1	-1	.	0
chr10	47301921	47302560	STAT5_hi_dDHS	Peak_5759	chr10	47302209	47302500	5383	291
chr10	47371801	47372460	STAT5_hi_dDHS	Peak_5761	chr10	47372024	47372903	5384	436
chr10	47373981	47374540	STAT5_hi_dDHS	Peak_5763	chr10	47373166	47374535	5385	554
chr10	52103081	52103460	STAT5_hi_dDHS	Peak_5806	.	-1	-1	.	0
chr10	53115021	53115400	STAT5_hi_dDHS	Peak_5824	.	-1	-1	.	0
chr10	53778521	53779060	STAT5_hi_dDHS	Peak_5847	chr10	53778502	53779284	5442	539
chr10	53995581	53996060	STAT5_hi_dDHS	Peak_5854	.	-1	-1	.	0
chr10	57005241	57005880	STAT5_hi_dDHS	Peak_5877	.	-1	-1	.	0
chr10	57020621	57021140	STAT5_hi_dDHS	Peak_5878	.	-1	-1	.	0
chr10	58703941	58704340	STAT5_hi_dDHS	Peak_5916	chr10	58703939	58704352	5490	399
chr10	58865741	58866100	STAT5_hi_dDHS	Peak_5928	chr10	58865661	58866868	5501	359
chr10	59236881	59237400	STAT5_hi_dDHS	Peak_5952	chr10	59236971	59237424	5529	429
chr10	59239881	59240420	STAT5_hi_dDHS	Peak_5953	chr10	59239919	59240403	5530	484
chr10	61068841	61069120	STAT5_hi_dDHS	Peak_6048	chr10	61068672	61069042	5657	201
chr10	66390901	66391200	STAT5_hi_dDHS	Peak_6149	chr10	66391178	66391760	5755	22
chr10	66518841	66519420	STAT5_hi_dDHS	Peak_6161	chr10	66519146	66519617	5769	274
chr10	67248221	67248800	STAT5_hi_dDHS	Peak_6203	chr10	67248296	67248879	5804	504
chr10	67552581	67553860	STAT5_hi_dDHS	Peak_6213	chr10	67552556	67553856	5809	1275
chr10	67554481	67555260	STAT5_hi_dDHS	Peak_6214	chr10	67554480	67556098	5811	779
chr10	67555941	67556880	STAT5_hi_dDHS	Peak_6215	chr10	67556311	67556573	5812	262
chr10	67589101	67590000	STAT5_hi_dDHS	Peak_6220	chr10	67589360	67589591	5820	231
chr10	67599161	67600540	STAT5_hi_dDHS	Peak_6222	chr10	67598918	67600739	5827	1379
chr10	67675041	67675680	STAT5_hi_dDHS	Peak_6231	chr10	67674263	67675504	5832	463
chr10	67693021	67693360	STAT5_hi_dDHS	Peak_6233	.	-1	-1	.	0
chr10	67710241	67712100	STAT5_hi_dDHS	Peak_6239	chr10	67710956	67711327	5839	371
chr10	67721901	67722680	STAT5_hi_dDHS	Peak_6240	chr10	67721944	67722590	5843	646
chr10	67818001	67818700	STAT5_hi_dDHS	Peak_6254	.	-1	-1	.	0
chr10	67901481	67902100	STAT5_hi_dDHS	Peak_6257	chr10	67901688	67902113	5860	412
chr10	68020921	68021960	STAT5_hi_dDHS	Peak_6271	chr10	68021241	68021721	5875	480
chr10	68096181	68096600	STAT5_hi_dDHS	Peak_6273	chr10	68096295	68096596	5876	301
chr10	70655581	70656480	STAT5_hi_dDHS	Peak_6358	chr10	70655421	70656364	5958	783
chr10	70838881	70839280	STAT5_hi_dDHS	Peak_6375	chr10	70838849	70839151	5979	270
chr10	74957941	74958580	STAT5_hi_dDHS	Peak_6439	chr10	74958022	74958978	6041	558
chr10	74966281	74966720	STAT5_hi_dDHS	Peak_6442	chr10	74966446	74968277	6048	274
chr10	76869101	76870000	STAT5_hi_dDHS	Peak_6544	chr10	76869225	76869662	6201	437
chr10	78080821	78081460	STAT5_hi_dDHS	Peak_6618	chr10	78081060	78081327	6295	267
chr10	79340561	79341160	STAT5_hi_dDHS	Peak_6659	chr10	79339745	79341253	6370	599
chr10	80221521	80221880	STAT5_hi_dDHS	Peak_6771	.	-1	-1	.	0
chr10	82257761	82258580	STAT5_hi_dDHS	Peak_6895	chr10	82257774	82258577	6931	803
chr10	82301181	82301560	STAT5_hi_dDHS	Peak_6900	chr10	82301244	82301441	6936	197
chr10	82789681	82790620	STAT5_hi_dDHS	Peak_6921	chr10	82789194	82790561	6954	880
chr10	82816381	82817020	STAT5_hi_dDHS	Peak_6924	.	-1	-1	.	0
chr10	86386221	86386860	STAT5_hi_dDHS	Peak_7030	chr10	86386327	86386745	7060	418
chr10	86493081	86493540	STAT5_hi_dDHS	Peak_7040	chr10	86493214	86493469	7073	255
chr10	86792181	86792840	STAT5_hi_dDHS	Peak_7044	chr10	86792312	86792727	7076	415
chr10	87008181	87008880	STAT5_hi_dDHS	Peak_7052	chr10	87008579	87009996	7092	301
chr10	87166761	87167360	STAT5_hi_dDHS	Peak_7061	chr10	87166944	87167241	7108	297
chr10	87180821	87181900	STAT5_hi_dDHS	Peak_7063	chr10	87181136	87181722	7111	586
chr10	87250161	87251160	STAT5_hi_dDHS	Peak_7066	chr10	87250284	87250912	7113	628
chr10	87258301	87258960	STAT5_hi_dDHS	Peak_7067	chr10	87258436	87258905	7114	469
chr10	87325201	87326400	STAT5_hi_dDHS	Peak_7077	chr10	87325625	87326461	7125	775
chr10	87327981	87329720	STAT5_hi_dDHS	Peak_7078	chr10	87328453	87329617	7126	1164
chr10	87334681	87335240	STAT5_hi_dDHS	Peak_7079	chr10	87334779	87334985	7127	206
chr10	87336141	87336600	STAT5_hi_dDHS	Peak_7080	chr10	87336319	87336687	7129	281
chr10	87359561	87360640	STAT5_hi_dDHS	Peak_7084	chr10	87359822	87360553	7134	731
chr10	87364161	87365440	STAT5_hi_dDHS	Peak_7085	chr10	87364629	87365015	7135	386
chr10	87369141	87370420	STAT5_hi_dDHS	Peak_7086	chr10	87368778	87370032	7139	891
chr10	87377681	87379220	STAT5_hi_dDHS	Peak_7087	chr10	87377788	87378964	7143	1176
chr10	88194521	88195040	STAT5_hi_dDHS	Peak_7113	chr10	88193143	88194916	7163	395
chr10	88860541	88861120	STAT5_hi_dDHS	Peak_7120	chr10	88860700	88861136	7169	420
chr10	89028021	89029120	STAT5_hi_dDHS	Peak_7141	chr10	89027979	89029351	7201	1099
chr10	89211341	89211900	STAT5_hi_dDHS	Peak_7161	chr10	89210880	89211705	7228	364
chr10	90120241	90120860	STAT5_hi_dDHS	Peak_7169	chr10	90120267	90120823	7232	556
chr10	90123781	90124260	STAT5_hi_dDHS	Peak_7170	chr10	90123679	90123989	7233	208
chr10	92713681	92714120	STAT5_hi_dDHS	Peak_7219	.	-1	-1	.	0
chr10	92717861	92718880	STAT5_hi_dDHS	Peak_7220	chr10	92717915	92718749	7278	834
chr10	92884661	92885200	STAT5_hi_dDHS	Peak_7232	chr10	92884748	92885059	7297	311
chr10	93362141	93362560	STAT5_hi_dDHS	Peak_7261	chr10	93362000	93362439	7329	298
chr10	93470221	93470860	STAT5_hi_dDHS	Peak_7263	chr10	93470265	93470678	7332	413
chr10	93536641	93537220	STAT5_hi_dDHS	Peak_7274	chr10	93536609	93537102	7344	461
chr10	94579921	94580440	STAT5_hi_dDHS	Peak_7333	chr10	94580148	94580455	7402	292
chr10	94604841	94606420	STAT5_hi_dDHS	Peak_7336	chr10	94605249	94606328	7406	1079
chr10	94607261	94607820	STAT5_hi_dDHS	Peak_7337	.	-1	-1	.	0
chr10	94608861	94609780	STAT5_hi_dDHS	Peak_7338	chr10	94609010	94610651	7407	770
chr10	94609801	94610820	STAT5_hi_dDHS	Peak_7339	chr10	94609010	94610651	7407	850
chr10	94614901	94615960	STAT5_hi_dDHS	Peak_7340	chr10	94615152	94615721	7408	569
chr10	94681221	94682060	STAT5_hi_dDHS	Peak_7343	chr10	94681337	94681957	7409	620
chr10	94695141	94695780	STAT5_hi_dDHS	Peak_7344	chr10	94695181	94695788	7410	599
chr10	94716941	94717980	STAT5_hi_dDHS	Peak_7347	chr10	94716797	94717644	7412	703
chr10	94727121	94727640	STAT5_hi_dDHS	Peak_7349	chr10	94727139	94727864	7415	501
chr10	94823781	94824280	STAT5_hi_dDHS	Peak_7360	chr10	94823859	94824132	7422	273
chr10	94848261	94848820	STAT5_hi_dDHS	Peak_7361	chr10	94848376	94848695	7423	319
chr10	94877741	94878320	STAT5_hi_dDHS	Peak_7365	chr10	94877747	94878932	7426	573
chr10	94880241	94881020	STAT5_hi_dDHS	Peak_7367	chr10	94879031	94880829	7427	588
chr10	94887081	94887520	STAT5_hi_dDHS	Peak_7368	chr10	94887073	94887519	7430	438
chr10	94888621	94889680	STAT5_hi_dDHS	Peak_7369	chr10	94888702	94889577	7431	875
chr10	94891761	94893580	STAT5_hi_dDHS	Peak_7370	chr10	94892844	94893567	7434	723
chr10	94901361	94902340	STAT5_hi_dDHS	Peak_7371	chr10	94901441	94902531	7436	899
chr10	95104921	95105320	STAT5_hi_dDHS	Peak_7390	.	-1	-1	.	0
chr10	95800801	95801380	STAT5_hi_dDHS	Peak_7442	chr10	95800754	95801111	7492	310
chr10	96205641	96206180	STAT5_hi_dDHS	Peak_7457	chr10	96205754	96206165	7504	411
chr10	98128581	98129280	STAT5_hi_dDHS	Peak_7481	chr10	98128795	98129097	7525	302
chr10	98424761	98425160	STAT5_hi_dDHS	Peak_7492	chr10	98424743	98424989	7533	228
chr10	98634281	98634880	STAT5_hi_dDHS	Peak_7509	chr10	98634566	98635120	7545	314
chr10	98689101	98689960	STAT5_hi_dDHS	Peak_7520	chr10	98689206	98689819	7559	613
chr10	103859341	103860740	STAT5_hi_dDHS	Peak_7592	chr10	103859256	103860635	7612	1294
chr10	103860761	103860980	STAT5_hi_dDHS	Peak_7593	.	-1	-1	.	0
chr10	106782541	106783400	STAT5_hi_dDHS	Peak_7638	chr10	106782784	106783177	7644	393
chr10	106790281	106791020	STAT5_hi_dDHS	Peak_7639	chr10	106790489	106790922	7645	433
chr10	106795521	106796220	STAT5_hi_dDHS	Peak_7641	chr10	106795540	106796187	7647	647
chr10	107377281	107378000	STAT5_hi_dDHS	Peak_7648	chr10	107377420	107377733	7651	313
chr10	107869141	107869600	STAT5_hi_dDHS	Peak_7672	chr10	107869220	107869574	7670	354
chr10	107882701	107883060	STAT5_hi_dDHS	Peak_7676	chr10	107882673	107884019	7673	359
chr10	108417021	108417400	STAT5_hi_dDHS	Peak_7694	chr10	108416796	108417032	7686	11
chr10	110752061	110752780	STAT5_hi_dDHS	Peak_7743	chr10	110752051	110752413	7719	352
chr10	110945861	110948160	STAT5_hi_dDHS	Peak_7758	chr10	110946244	110947302	7736	1058
chr10	110971581	110972120	STAT5_hi_dDHS	Peak_7761	.	-1	-1	.	0
chr10	110980801	110981380	STAT5_hi_dDHS	Peak_7762	chr10	110980835	110981371	7741	536
chr10	110981701	110982280	STAT5_hi_dDHS	Peak_7763	chr10	110981570	110982062	7742	361
chr10	111018961	111021400	STAT5_hi_dDHS	Peak_7768	.	-1	-1	.	0
chr10	111036141	111037860	STAT5_hi_dDHS	Peak_7772	.	-1	-1	.	0
chr10	112391001	112391720	STAT5_hi_dDHS	Peak_7804	chr10	112391137	112391576	7779	439
chr10	114670781	114671500	STAT5_hi_dDHS	Peak_7819	chr10	114670899	114671384	7786	485
chr10	114687361	114687740	STAT5_hi_dDHS	Peak_7821	chr10	114687468	114687746	7788	272
chr10	114820481	114821200	STAT5_hi_dDHS	Peak_7836	.	-1	-1	.	0
chr10	115217161	115217720	STAT5_hi_dDHS	Peak_7841	chr10	115216912	115217750	7805	559
chr10	116433181	116433820	STAT5_hi_dDHS	Peak_7870	chr10	116433286	116433726	7827	440
chr10	116622261	116623080	STAT5_hi_dDHS	Peak_7884	chr10	116622574	116622787	7838	213
chr10	116874081	116874840	STAT5_hi_dDHS	Peak_7901	chr10	116873865	116874679	7854	598
chr10	117322041	117322500	STAT5_hi_dDHS	Peak_7926	chr10	117322162	117322379	7881	217
chr10	120786541	120787400	STAT5_hi_dDHS	Peak_8033	chr10	120786394	120787235	7967	694
chr10	120922621	120922880	STAT5_hi_dDHS	Peak_8045	.	-1	-1	.	0
chr10	121022181	121022760	STAT5_hi_dDHS	Peak_8059	chr10	121022063	121022400	8005	219
chr10	121750901	121751420	STAT5_hi_dDHS	Peak_8078	chr10	121751050	121751321	8024	271
chr10	121763781	121764560	STAT5_hi_dDHS	Peak_8079	chr10	121763889	121764532	8025	643
chr10	121956141	121956980	STAT5_hi_dDHS	Peak_8095	chr10	121956302	121956911	8039	609
chr10	121959541	121959900	STAT5_hi_dDHS	Peak_8096	.	-1	-1	.	0
chr10	124722461	124722840	STAT5_hi_dDHS	Peak_8139	chr10	124722361	124722834	8079	373
chr10	125437981	125438560	STAT5_hi_dDHS	Peak_8173	chr10	125437801	125438495	8108	514
chr10	127192261	127193020	STAT5_hi_dDHS	Peak_8259	chr10	127191651	127192868	8221	607
chr10	127440401	127440880	STAT5_hi_dDHS	Peak_8289	chr10	127440556	127440846	8252	290
chr10	127508341	127508920	STAT5_hi_dDHS	Peak_8298	chr10	127508498	127508823	8258	325
chr11	4128361	4128740	STAT5_hi_dDHS	Peak_8494	chr11	4128510	4128813	8415	230
chr11	5280141	5280740	STAT5_hi_dDHS	Peak_8545	chr11	5280285	5280660	8467	375
chr11	5391861	5392620	STAT5_hi_dDHS	Peak_8559	chr11	5391977	5392381	8479	404
chr11	5398841	5399940	STAT5_hi_dDHS	Peak_8561	.	-1	-1	.	0
chr11	5401981	5403060	STAT5_hi_dDHS	Peak_8562	chr11	5402300	5402840	8483	540
chr11	5405541	5406600	STAT5_hi_dDHS	Peak_8563	chr11	5405754	5406478	8484	724
chr11	5409641	5410500	STAT5_hi_dDHS	Peak_8564	chr11	5409374	5411048	8485	859
chr11	5426021	5428680	STAT5_hi_dDHS	Peak_8567	chr11	5427098	5427404	8490	306
chr11	7035241	7035580	STAT5_hi_dDHS	Peak_8626	chr11	7035136	7036582	8569	339
chr11	7052001	7052780	STAT5_hi_dDHS	Peak_8629	.	-1	-1	.	0
chr11	8138381	8139040	STAT5_hi_dDHS	Peak_8655	chr11	8138477	8138917	8604	440
chr11	8469241	8469900	STAT5_hi_dDHS	Peak_8669	chr11	8469001	8470099	8623	659
chr11	11788021	11788760	STAT5_hi_dDHS	Peak_8704	chr11	11788137	11788884	8673	623
chr11	11830221	11831200	STAT5_hi_dDHS	Peak_8708	chr11	11830173	11830982	8682	761
chr11	11832341	11832900	STAT5_hi_dDHS	Peak_8709	chr11	11832222	11833672	8683	559
chr11	11845701	11846520	STAT5_hi_dDHS	Peak_8711	chr11	11845823	11846483	8687	660
chr11	11860641	11861420	STAT5_hi_dDHS	Peak_8712	chr11	11860783	11861326	8688	543
chr11	11861601	11862920	STAT5_hi_dDHS	Peak_8713	chr11	11861777	11862936	8689	1143
chr11	16488761	16489960	STAT5_hi_dDHS	Peak_8748	chr11	16489044	16489779	8728	735
chr11	16490301	16490860	STAT5_hi_dDHS	Peak_8749	chr11	16490634	16490830	8729	196
chr11	16601521	16602420	STAT5_hi_dDHS	Peak_8751	chr11	16601617	16602881	8733	803
chr11	16602761	16604400	STAT5_hi_dDHS	Peak_8752	chr11	16603052	16603635	8734	583
chr11	16642101	16643040	STAT5_hi_dDHS	Peak_8755	chr11	16641796	16643325	8737	939
chr11	16644481	16645620	STAT5_hi_dDHS	Peak_8756	chr11	16644557	16645242	8738	685
chr11	16668821	16669280	STAT5_hi_dDHS	Peak_8761	chr11	16669177	16670271	8745	103
chr11	16669561	16670220	STAT5_hi_dDHS	Peak_8762	chr11	16669177	16670271	8745	659
chr11	16675021	16675360	STAT5_hi_dDHS	Peak_8763	chr11	16675083	16675441	8747	277
chr11	16683541	16684120	STAT5_hi_dDHS	Peak_8764	chr11	16683945	16684607	8752	175
chr11	17401061	17401580	STAT5_hi_dDHS	Peak_8791	chr11	17401176	17401568	8823	392
chr11	17633641	17634020	STAT5_hi_dDHS	Peak_8799	.	-1	-1	.	0
chr11	17635941	17636780	STAT5_hi_dDHS	Peak_8801	chr11	17636095	17636525	8828	430
chr11	17956401	17956720	STAT5_hi_dDHS	Peak_8806	.	-1	-1	.	0
chr11	19887561	19887980	STAT5_hi_dDHS	Peak_8837	chr11	19887291	19888010	8870	419
chr11	19890801	19891100	STAT5_hi_dDHS	Peak_8838	.	-1	-1	.	0
chr11	19891281	19891860	STAT5_hi_dDHS	Peak_8839	chr11	19891362	19891918	8871	498
chr11	20182701	20183220	STAT5_hi_dDHS	Peak_8856	chr11	20182955	20183178	8883	223
chr11	21265201	21265720	STAT5_hi_dDHS	Peak_8914	.	-1	-1	.	0
chr11	22388081	22388520	STAT5_hi_dDHS	Peak_8955	.	-1	-1	.	0
chr11	23040641	23041540	STAT5_hi_dDHS	Peak_8999	chr11	23040817	23041760	9022	723
chr11	28584061	28584920	STAT5_hi_dDHS	Peak_9054	chr11	28584135	28584652	9066	517
chr11	28594861	28595540	STAT5_hi_dDHS	Peak_9056	chr11	28594724	28595480	9070	619
chr11	28596701	28597000	STAT5_hi_dDHS	Peak_9057	.	-1	-1	.	0
chr11	28602081	28602980	STAT5_hi_dDHS	Peak_9058	chr11	28602330	28602823	9071	493
chr11	28807741	28808160	STAT5_hi_dDHS	Peak_9062	.	-1	-1	.	0
chr11	28809181	28809660	STAT5_hi_dDHS	Peak_9063	.	-1	-1	.	0
chr11	30648921	30649320	STAT5_hi_dDHS	Peak_9095	chr11	30648931	30649285	9107	354
chr11	31618181	31618580	STAT5_hi_dDHS	Peak_9108	chr11	31618270	31618980	9126	310
chr11	34659141	34659580	STAT5_hi_dDHS	Peak_9192	.	-1	-1	.	0
chr11	43451801	43452600	STAT5_hi_dDHS	Peak_9285	chr11	43451801	43452337	9324	536
chr11	46378061	46378660	STAT5_hi_dDHS	Peak_9385	chr11	46377955	46378684	9430	599
chr11	48712301	48712840	STAT5_hi_dDHS	Peak_9414	chr11	48712402	48712791	9476	389
chr11	48805701	48805980	STAT5_hi_dDHS	Peak_9415	chr11	48805682	48805974	9477	273
chr11	48900061	48900920	STAT5_hi_dDHS	Peak_9419	chr11	48900112	48900946	9483	808
chr11	49850601	49850940	STAT5_hi_dDHS	Peak_9456	chr11	49850266	49850604	9529	3
chr11	49913961	49914700	STAT5_hi_dDHS	Peak_9459	chr11	49914109	49914394	9531	285
chr11	50010801	50011500	STAT5_hi_dDHS	Peak_9477	chr11	50010483	50011452	9560	651
chr11	50482701	50483440	STAT5_hi_dDHS	Peak_9501	chr11	50482644	50483854	9607	739
chr11	51307681	51308180	STAT5_hi_dDHS	Peak_9519	chr11	51307773	51308082	9625	309
chr11	51620561	51621420	STAT5_hi_dDHS	Peak_9548	chr11	51620705	51621225	9660	520
chr11	51729641	51730300	STAT5_hi_dDHS	Peak_9559	chr11	51729426	51730329	9672	659
chr11	53227421	53227980	STAT5_hi_dDHS	Peak_9606	chr11	53227394	53227859	9736	438
chr11	55268761	55269200	STAT5_hi_dDHS	Peak_9728	chr11	55268933	55269056	9868	123
chr11	57997041	57997580	STAT5_hi_dDHS	Peak_9776	chr11	57997145	57997548	9927	403
chr11	58029121	58030000	STAT5_hi_dDHS	Peak_9782	chr11	58029437	58029786	9935	349
chr11	59753261	59753740	STAT5_hi_dDHS	Peak_9852	.	-1	-1	.	0
chr11	60746981	60747680	STAT5_hi_dDHS	Peak_9922	chr11	60746933	60747505	10107	524
chr11	60755881	60756420	STAT5_hi_dDHS	Peak_9925	chr11	60755972	60756507	10112	448
chr11	60796101	60796480	STAT5_hi_dDHS	Peak_9928	chr11	60796443	60796749	10115	37
chr11	62292401	62292860	STAT5_hi_dDHS	Peak_9988	chr11	62292481	62293477	10176	379
chr11	62459481	62459980	STAT5_hi_dDHS	Peak_10004	chr11	62459333	62460193	10197	499
chr11	63710461	63710960	STAT5_hi_dDHS	Peak_10043	chr11	63710218	63710880	10248	419
chr11	63712241	63712600	STAT5_hi_dDHS	Peak_10044	chr11	63712095	63712927	10250	359
chr11	64400541	64401140	STAT5_hi_dDHS	Peak_10071	chr11	64400492	64401075	10286	534
chr11	65567621	65568220	STAT5_hi_dDHS	Peak_10086	chr11	65567737	65568075	10299	338
chr11	67370941	67371340	STAT5_hi_dDHS	Peak_10115	chr11	67370997	67371180	10340	183
chr11	68653241	68653640	STAT5_hi_dDHS	Peak_10136	chr11	68653194	68653497	10358	256
chr11	70559081	70559620	STAT5_hi_dDHS	Peak_10314	chr11	70559233	70559452	10544	219
chr11	70758901	70759360	STAT5_hi_dDHS	Peak_10331	chr11	70759133	70759309	10559	176
chr11	72093861	72094460	STAT5_hi_dDHS	Peak_10354	.	-1	-1	.	0
chr11	72094481	72095460	STAT5_hi_dDHS	Peak_10355	chr11	72094734	72095267	10587	533
chr11	73042401	73042780	STAT5_hi_dDHS	Peak_10413	chr11	73042350	73042858	10653	379
chr11	76228401	76228920	STAT5_hi_dDHS	Peak_10552	chr11	76228533	76228866	10809	333
chr11	77231421	77232040	STAT5_hi_dDHS	Peak_10601	chr11	77231716	77231921	10868	205
chr11	77601181	77601780	STAT5_hi_dDHS	Peak_10639	chr11	77601224	77601658	10907	434
chr11	78659521	78660480	STAT5_hi_dDHS	Peak_10725	chr11	78659587	78660283	11008	696
chr11	79374101	79374700	STAT5_hi_dDHS	Peak_10767	chr11	79373997	79374545	11047	444
chr11	79381761	79382420	STAT5_hi_dDHS	Peak_10768	.	-1	-1	.	0
chr11	80260361	80260800	STAT5_hi_dDHS	Peak_10839	chr11	80260537	80260819	11135	263
chr11	83710281	83710660	STAT5_hi_dDHS	Peak_10948	chr11	83710248	83710864	11257	379
chr11	83719321	83719700	STAT5_hi_dDHS	Peak_10949	chr11	83719253	83719576	11258	255
chr11	83829541	83830060	STAT5_hi_dDHS	Peak_10959	.	-1	-1	.	0
chr11	84005641	84006300	STAT5_hi_dDHS	Peak_10975	.	-1	-1	.	0
chr11	84011241	84011740	STAT5_hi_dDHS	Peak_10977	chr11	84011248	84011929	11290	492
chr11	86194081	86194540	STAT5_hi_dDHS	Peak_11055	chr11	86194424	86194581	11385	116
chr11	86392081	86396920	STAT5_hi_dDHS	Peak_11069	.	-1	-1	.	0
chr11	86399981	86401260	STAT5_hi_dDHS	Peak_11071	chr11	86399914	86401148	11400	1167
chr11	86409581	86410420	STAT5_hi_dDHS	Peak_11072	chr11	86409676	86410089	11402	413
chr11	86412021	86412460	STAT5_hi_dDHS	Peak_11073	chr11	86412184	86412336	11403	152
chr11	86417081	86417740	STAT5_hi_dDHS	Peak_11074	.	-1	-1	.	0
chr11	86418161	86418640	STAT5_hi_dDHS	Peak_11075	.	-1	-1	.	0
chr11	86427141	86428060	STAT5_hi_dDHS	Peak_11076	chr11	86427582	86427920	11404	338
chr11	86442601	86443820	STAT5_hi_dDHS	Peak_11078	chr11	86442903	86443252	11405	349
chr11	93995901	93996620	STAT5_hi_dDHS	Peak_11304	.	-1	-1	.	0
chr11	97163361	97163980	STAT5_hi_dDHS	Peak_11512	chr11	97163481	97163823	11863	342
chr11	97170541	97170860	STAT5_hi_dDHS	Peak_11513	chr11	97170667	97171020	11864	193
chr11	98424961	98425820	STAT5_hi_dDHS	Peak_11607	chr11	98425265	98425645	11978	380
chr11	101148601	101149240	STAT5_hi_dDHS	Peak_11802	chr11	101148695	101148980	12214	285
chr11	101214781	101215500	STAT5_hi_dDHS	Peak_11810	chr11	101214763	101215494	12221	713
chr11	102610841	102611260	STAT5_hi_dDHS	Peak_11939	chr11	102610895	102611508	12368	365
chr11	103123361	103123900	STAT5_hi_dDHS	Peak_11965	chr11	103123115	103123972	12399	539
chr11	104254021	104254880	STAT5_hi_dDHS	Peak_12011	chr11	104254261	104254771	12450	510
chr11	106273701	106274720	STAT5_hi_dDHS	Peak_12084	chr11	106274058	106274617	12544	559
chr11	106673921	106674360	STAT5_hi_dDHS	Peak_12143	chr11	106673864	106674069	12588	148
chr11	107066101	107066460	STAT5_hi_dDHS	Peak_12176	chr11	107066008	107066572	12620	359
chr11	107289181	107290040	STAT5_hi_dDHS	Peak_12200	chr11	107289272	107290034	12652	762
chr11	107711281	107711960	STAT5_hi_dDHS	Peak_12218	chr11	107711352	107711770	12675	418
chr11	109852441	109852880	STAT5_hi_dDHS	Peak_12318	.	-1	-1	.	0
chr11	109855081	109855880	STAT5_hi_dDHS	Peak_12319	chr11	109855284	109855964	12786	596
chr11	109933321	109933920	STAT5_hi_dDHS	Peak_12326	chr11	109933512	109933762	12794	250
chr11	111101781	111102140	STAT5_hi_dDHS	Peak_12386	chr11	111101824	111102084	12861	260
chr11	111117161	111117800	STAT5_hi_dDHS	Peak_12388	chr11	111117363	111117611	12863	248
chr11	111131161	111131400	STAT5_hi_dDHS	Peak_12389	.	-1	-1	.	0
chr11	111304561	111305120	STAT5_hi_dDHS	Peak_12393	.	-1	-1	.	0
chr11	112080301	112080560	STAT5_hi_dDHS	Peak_12407	chr11	112080272	112081008	12872	259
chr11	112080821	112081020	STAT5_hi_dDHS	Peak_12408	chr11	112080272	112081008	12872	187
chr11	112582501	112582800	STAT5_hi_dDHS	Peak_12412	chr11	112581818	112582664	12875	163
chr11	112601001	112601460	STAT5_hi_dDHS	Peak_12415	chr11	112601014	112601535	12880	446
chr11	112872081	112872780	STAT5_hi_dDHS	Peak_12429	chr11	112872105	112873069	12896	675
chr11	112924241	112924720	STAT5_hi_dDHS	Peak_12432	chr11	112924000	112924740	12900	479
chr11	115235241	115235700	STAT5_hi_dDHS	Peak_12528	chr11	115235542	115235758	13030	158
chr11	115463581	115464300	STAT5_hi_dDHS	Peak_12547	chr11	115463753	115463890	13053	137
chr11	115889041	115889640	STAT5_hi_dDHS	Peak_12586	chr11	115889082	115889357	13088	275
chr11	116067221	116067860	STAT5_hi_dDHS	Peak_12603	chr11	116067416	116067761	13123	345
chr11	117823401	117823920	STAT5_hi_dDHS	Peak_12734	.	-1	-1	.	0
chr11	117826521	117827260	STAT5_hi_dDHS	Peak_12736	chr11	117826101	117827229	13280	708
chr11	119492381	119492900	STAT5_hi_dDHS	Peak_12835	chr11	119492670	119492942	13422	230
chr11	120058221	120058500	STAT5_hi_dDHS	Peak_12870	.	-1	-1	.	0
chr11	120990961	120991440	STAT5_hi_dDHS	Peak_12979	.	-1	-1	.	0
chr11	121004721	121005040	STAT5_hi_dDHS	Peak_12980	.	-1	-1	.	0
chr11	121189441	121190260	STAT5_hi_dDHS	Peak_12993	chr11	121189313	121190207	13581	766
chr12	4456621	4456980	STAT5_hi_dDHS	Peak_13074	.	-1	-1	.	0
chr12	4590561	4591060	STAT5_hi_dDHS	Peak_13080	.	-1	-1	.	0
chr12	4775101	4775540	STAT5_hi_dDHS	Peak_13084	chr12	4775304	4776317	13682	236
chr12	7944001	7944920	STAT5_hi_dDHS	Peak_13113	.	-1	-1	.	0
chr12	7982601	7983340	STAT5_hi_dDHS	Peak_13116	chr12	7982495	7983354	13724	739
chr12	8096361	8097100	STAT5_hi_dDHS	Peak_13128	chr12	8096808	8097214	13747	292
chr12	8341061	8341640	STAT5_hi_dDHS	Peak_13143	chr12	8340408	8341655	13761	579
chr12	16637021	16637560	STAT5_hi_dDHS	Peak_13329	chr12	16636905	16638286	13950	539
chr12	16847661	16848320	STAT5_hi_dDHS	Peak_13342	chr12	16847754	16848266	13962	512
chr12	16871161	16872040	STAT5_hi_dDHS	Peak_13345	chr12	16871273	16871716	13966	443
chr12	17457181	17457980	STAT5_hi_dDHS	Peak_13367	chr12	17457441	17457640	13991	199
chr12	17513621	17514420	STAT5_hi_dDHS	Peak_13374	chr12	17512633	17514625	14000	799
chr12	21139781	21140420	STAT5_hi_dDHS	Peak_13393	chr12	21140418	21140598	14024	2
chr12	25278021	25278620	STAT5_hi_dDHS	Peak_13423	chr12	25277838	25278565	14062	544
chr12	25797681	25798100	STAT5_hi_dDHS	Peak_13450	chr12	25797593	25797948	14091	267
chr12	25866301	25866700	STAT5_hi_dDHS	Peak_13462	chr12	25866269	25866420	14108	119
chr12	26556521	26556940	STAT5_hi_dDHS	Peak_13495	chr12	26556699	26557024	14146	241
chr12	31056761	31057720	STAT5_hi_dDHS	Peak_13591	.	-1	-1	.	0
chr12	31627241	31627820	STAT5_hi_dDHS	Peak_13599	chr12	31627341	31627622	14252	281
chr12	33363621	33364160	STAT5_hi_dDHS	Peak_13641	chr12	33363558	33364017	14286	396
chr12	33996201	33997240	STAT5_hi_dDHS	Peak_13678	chr12	33996221	33997121	14322	900
chr12	35673941	35674940	STAT5_hi_dDHS	Peak_13697	chr12	35673942	35674760	14346	818
chr12	35682421	35683100	STAT5_hi_dDHS	Peak_13698	.	-1	-1	.	0
chr12	35976281	35976840	STAT5_hi_dDHS	Peak_13714	chr12	35976579	35976893	14359	261
chr12	36272781	36273080	STAT5_hi_dDHS	Peak_13733	chr12	36272608	36272945	14377	164
chr12	36366401	36367120	STAT5_hi_dDHS	Peak_13740	chr12	36366479	36366952	14383	473
chr12	37957561	37958160	STAT5_hi_dDHS	Peak_13758	chr12	37957741	37958100	14397	359
chr12	40946521	40946740	STAT5_hi_dDHS	Peak_13795	chr12	40946698	40947195	14421	42
chr12	41278781	41279200	STAT5_hi_dDHS	Peak_13813	chr12	41278728	41279155	14447	374
chr12	41285561	41286220	STAT5_hi_dDHS	Peak_13815	chr12	41285412	41286091	14449	530
chr12	41295621	41296060	STAT5_hi_dDHS	Peak_13817	chr12	41295688	41296039	14451	351
chr12	41298921	41299600	STAT5_hi_dDHS	Peak_13818	chr12	41299085	41299461	14452	376
chr12	41300521	41301360	STAT5_hi_dDHS	Peak_13819	chr12	41300566	41301191	14453	625
chr12	41308441	41308960	STAT5_hi_dDHS	Peak_13820	.	-1	-1	.	0
chr12	41808461	41808860	STAT5_hi_dDHS	Peak_13831	chr12	41808569	41808731	14462	162
chr12	41816441	41816720	STAT5_hi_dDHS	Peak_13832	chr12	41816524	41816802	14463	196
chr12	46166441	46166820	STAT5_hi_dDHS	Peak_13884	.	-1	-1	.	0
chr12	52374381	52375780	STAT5_hi_dDHS	Peak_13915	chr12	52374507	52375595	14509	1088
chr12	52712581	52713840	STAT5_hi_dDHS	Peak_13925	chr12	52712848	52714014	14519	992
chr12	53116341	53116920	STAT5_hi_dDHS	Peak_13947	.	-1	-1	.	0
chr12	53572421	53573240	STAT5_hi_dDHS	Peak_13963	chr12	53572521	53573099	14555	578
chr12	58500061	58500820	STAT5_hi_dDHS	Peak_14083	chr12	58500533	58500765	14668	232
chr12	58503321	58503780	STAT5_hi_dDHS	Peak_14084	chr12	58503427	58503703	14669	276
chr12	58616341	58617140	STAT5_hi_dDHS	Peak_14091	chr12	58616434	58617106	14675	672
chr12	58638561	58639280	STAT5_hi_dDHS	Peak_14092	.	-1	-1	.	0
chr12	58750801	58752340	STAT5_hi_dDHS	Peak_14101	chr12	58750944	58752074	14687	1130
chr12	63977861	63978400	STAT5_hi_dDHS	Peak_14149	.	-1	-1	.	0
chr12	70519981	70520760	STAT5_hi_dDHS	Peak_14193	chr12	70520068	70520556	14766	488
chr12	70552121	70552540	STAT5_hi_dDHS	Peak_14196	chr12	70552188	70552440	14769	252
chr12	70638901	70639280	STAT5_hi_dDHS	Peak_14203	.	-1	-1	.	0
chr12	70859961	70860640	STAT5_hi_dDHS	Peak_14218	.	-1	-1	.	0
chr12	70964541	70965680	STAT5_hi_dDHS	Peak_14224	chr12	70964955	70965607	14801	652
chr12	71326621	71327100	STAT5_hi_dDHS	Peak_14248	chr12	71326260	71327129	14818	479
chr12	72547121	72547780	STAT5_hi_dDHS	Peak_14308	chr12	72546567	72548495	14875	659
chr12	72976401	72977180	STAT5_hi_dDHS	Peak_14323	chr12	72976713	72977605	14895	467
chr12	75031721	75032340	STAT5_hi_dDHS	Peak_14447	chr12	75031323	75032230	15020	509
chr12	76590021	76590480	STAT5_hi_dDHS	Peak_14468	.	-1	-1	.	0
chr12	77404441	77404800	STAT5_hi_dDHS	Peak_14529	chr12	77404393	77404869	15094	359
chr12	78157821	78158240	STAT5_hi_dDHS	Peak_14559	chr12	78157804	78158170	15132	349
chr12	78450361	78450900	STAT5_hi_dDHS	Peak_14572	chr12	78450557	78450809	15145	252
chr12	78599181	78599620	STAT5_hi_dDHS	Peak_14574	chr12	78598984	78599683	15146	439
chr12	78602781	78603820	STAT5_hi_dDHS	Peak_14575	chr12	78602522	78603913	15148	1039
chr12	79053421	79053820	STAT5_hi_dDHS	Peak_14583	chr12	79053383	79053801	15158	380
chr12	79310761	79311360	STAT5_hi_dDHS	Peak_14589	chr12	79310627	79311192	15163	431
chr12	80658721	80660100	STAT5_hi_dDHS	Peak_14652	chr12	80658701	80659441	15214	720
chr12	80703681	80704060	STAT5_hi_dDHS	Peak_14659	chr12	80703758	80703915	15221	157
chr12	80750161	80750900	STAT5_hi_dDHS	Peak_14665	chr12	80750401	80750637	15228	236
chr12	81538121	81538900	STAT5_hi_dDHS	Peak_14730	chr12	81538357	81538697	15306	340
chr12	81945061	81945620	STAT5_hi_dDHS	Peak_14756	chr12	81945127	81945480	15326	353
chr12	81954561	81955200	STAT5_hi_dDHS	Peak_14758	chr12	81954747	81955124	15327	377
chr12	81955661	81956420	STAT5_hi_dDHS	Peak_14759	chr12	81955563	81955980	15328	319
chr12	81986301	81986780	STAT5_hi_dDHS	Peak_14761	chr12	81986375	81986720	15329	345
chr12	81987801	81988660	STAT5_hi_dDHS	Peak_14762	chr12	81988025	81988528	15330	503
chr12	83044361	83045120	STAT5_hi_dDHS	Peak_14816	chr12	83044240	83045018	15405	657
chr12	83858021	83858300	STAT5_hi_dDHS	Peak_14845	chr12	83857883	83858305	15436	279
chr12	84016721	84017280	STAT5_hi_dDHS	Peak_14850	chr12	84016821	84017275	15442	454
chr12	84932901	84933420	STAT5_hi_dDHS	Peak_14877	.	-1	-1	.	0
chr12	84959161	84959480	STAT5_hi_dDHS	Peak_14881	chr12	84958850	84959368	15480	207
chr12	85619781	85620200	STAT5_hi_dDHS	Peak_14945	chr12	85619932	85620192	15548	260
chr12	86399641	86399960	STAT5_hi_dDHS	Peak_14978	.	-1	-1	.	0
chr12	86639981	86640580	STAT5_hi_dDHS	Peak_14995	.	-1	-1	.	0
chr12	86643841	86644480	STAT5_hi_dDHS	Peak_14996	chr12	86644247	86644585	15600	233
chr12	87854541	87854800	STAT5_hi_dDHS	Peak_15043	chr12	87854662	87855195	15665	138
chr12	88157981	88158320	STAT5_hi_dDHS	Peak_15059	chr12	88157856	88158339	15685	339
chr12	88240701	88241140	STAT5_hi_dDHS	Peak_15074	.	-1	-1	.	0
chr12	93168021	93168340	STAT5_hi_dDHS	Peak_15159	chr12	93168038	93168426	15778	302
chr12	94550681	94551220	STAT5_hi_dDHS	Peak_15164	chr12	94550704	94550978	15782	274
chr12	101096641	101097200	STAT5_hi_dDHS	Peak_15263	chr12	101096676	101097164	15871	488
chr12	101097221	101097660	STAT5_hi_dDHS	Peak_15264	chr12	101097514	101098102	15872	146
chr12	103691701	103692180	STAT5_hi_dDHS	Peak_15361	chr12	103691829	103692047	15975	218
chr12	104788181	104788760	STAT5_hi_dDHS	Peak_15406	chr12	104788295	104788524	16029	229
chr12	104871441	104872380	STAT5_hi_dDHS	Peak_15414	chr12	104871763	104872263	16036	500
chr12	104873701	104874020	STAT5_hi_dDHS	Peak_15415	chr12	104873665	104873831	16037	130
chr12	105221161	105221620	STAT5_hi_dDHS	Peak_15437	chr12	105221238	105221640	16084	382
chr12	105230161	105231800	STAT5_hi_dDHS	Peak_15439	chr12	105230168	105231656	16088	1488
chr12	105234461	105235480	STAT5_hi_dDHS	Peak_15440	chr12	105234666	105235580	16090	814
chr12	105307661	105308280	STAT5_hi_dDHS	Peak_15450	chr12	105307818	105308391	16106	462
chr12	105312161	105313080	STAT5_hi_dDHS	Peak_15451	chr12	105312220	105313035	16107	815
chr12	105314321	105315480	STAT5_hi_dDHS	Peak_15452	chr12	105314689	105316525	16109	791
chr12	105322581	105327900	STAT5_hi_dDHS	Peak_15454	chr12	105327473	105328090	16116	427
chr12	105572561	105573560	STAT5_hi_dDHS	Peak_15470	chr12	105572844	105573253	16126	409
chr12	105576201	105577220	STAT5_hi_dDHS	Peak_15472	chr12	105576358	105577505	16128	862
chr12	105581341	105586280	STAT5_hi_dDHS	Peak_15473	.	-1	-1	.	0
chr12	105632841	105633080	STAT5_hi_dDHS	Peak_15478	chr12	105632765	105633183	16136	239
chr12	105634121	105634520	STAT5_hi_dDHS	Peak_15479	.	-1	-1	.	0
chr12	105644861	105645100	STAT5_hi_dDHS	Peak_15483	chr12	105644654	105645499	16138	239
chr12	105652801	105653120	STAT5_hi_dDHS	Peak_15484	.	-1	-1	.	0
chr12	106230941	106231320	STAT5_hi_dDHS	Peak_15510	chr12	106231039	106231432	16179	281
chr12	106966921	106967620	STAT5_hi_dDHS	Peak_15526	chr12	106967111	106967512	16215	401
chr12	111459421	111459880	STAT5_hi_dDHS	Peak_15629	chr12	111458577	111459748	16329	327
chr12	112288381	112288920	STAT5_hi_dDHS	Peak_15681	chr12	112288503	112288832	16386	329
chr12	114344281	114344960	STAT5_hi_dDHS	Peak_15811	chr12	114344576	114345201	16575	384
chr12	119551841	119552220	STAT5_hi_dDHS	Peak_15890	chr12	119551942	119552223	16649	278
chr13	3765161	3765860	STAT5_hi_dDHS	Peak_15938	chr13	3765517	3765741	16683	224
chr13	3767801	3768280	STAT5_hi_dDHS	Peak_15939	chr13	3767845	3768431	16684	435
chr13	4050261	4050940	STAT5_hi_dDHS	Peak_15958	chr13	4050165	4050859	16704	598
chr13	4269541	4270260	STAT5_hi_dDHS	Peak_15971	.	-1	-1	.	0
chr13	4467001	4467820	STAT5_hi_dDHS	Peak_15987	chr13	4467164	4467563	16728	399
chr13	4577181	4577680	STAT5_hi_dDHS	Peak_15995	.	-1	-1	.	0
chr13	5803181	5804200	STAT5_hi_dDHS	Peak_16012	chr13	5802729	5804119	16739	938
chr13	5840321	5840920	STAT5_hi_dDHS	Peak_16017	chr13	5840749	5840990	16741	171
chr13	5869041	5869400	STAT5_hi_dDHS	Peak_16020	.	-1	-1	.	0
chr13	6059381	6059600	STAT5_hi_dDHS	Peak_16024	chr13	6058704	6059700	16746	219
chr13	8698841	8699660	STAT5_hi_dDHS	Peak_16049	chr13	8698515	8699763	16760	819
chr13	8861781	8862120	STAT5_hi_dDHS	Peak_16054	chr13	8861708	8862080	16761	299
chr13	8863921	8864400	STAT5_hi_dDHS	Peak_16055	.	-1	-1	.	0
chr13	9012161	9013080	STAT5_hi_dDHS	Peak_16062	.	-1	-1	.	0
chr13	9056301	9057460	STAT5_hi_dDHS	Peak_16069	chr13	9056235	9057269	16770	968
chr13	9060501	9061140	STAT5_hi_dDHS	Peak_16071	chr13	9060617	9061120	16773	503
chr13	9072801	9073580	STAT5_hi_dDHS	Peak_16073	chr13	9073032	9073501	16775	469
chr13	9128081	9128480	STAT5_hi_dDHS	Peak_16081	chr13	9127998	9128422	16780	341
chr13	9222401	9222820	STAT5_hi_dDHS	Peak_16085	chr13	9222087	9222580	16785	179
chr13	10779701	10780400	STAT5_hi_dDHS	Peak_16124	chr13	10779760	10780001	16799	241
chr13	14118661	14119440	STAT5_hi_dDHS	Peak_16173	chr13	14118697	14119233	16844	536
chr13	14123301	14123760	STAT5_hi_dDHS	Peak_16174	.	-1	-1	.	0
chr13	16138321	16139160	STAT5_hi_dDHS	Peak_16197	chr13	16138680	16138995	16860	315
chr13	16160841	16161480	STAT5_hi_dDHS	Peak_16199	chr13	16160969	16161288	16861	319
chr13	16371541	16372920	STAT5_hi_dDHS	Peak_16206	chr13	16372332	16372818	16866	486
chr13	16407421	16407960	STAT5_hi_dDHS	Peak_16209	chr13	16407554	16408000	16869	406
chr13	16408041	16408980	STAT5_hi_dDHS	Peak_16210	chr13	16408327	16409109	16870	653
chr13	16667041	16667380	STAT5_hi_dDHS	Peak_16217	.	-1	-1	.	0
chr13	20752761	20753460	STAT5_hi_dDHS	Peak_16300	chr13	20752866	20753432	16911	566
chr13	23684761	23685360	STAT5_hi_dDHS	Peak_16420	chr13	23685102	23685258	17031	156
chr13	23800401	23800940	STAT5_hi_dDHS	Peak_16431	chr13	23800560	23800837	17044	277
chr13	23895961	23896900	STAT5_hi_dDHS	Peak_16452	chr13	23896310	23896766	17063	456
chr13	23932601	23933500	STAT5_hi_dDHS	Peak_16459	chr13	23932867	23933192	17076	325
chr13	24430121	24430820	STAT5_hi_dDHS	Peak_16484	chr13	24429635	24431012	17099	699
chr13	24444861	24445380	STAT5_hi_dDHS	Peak_16486	chr13	24444802	24445677	17101	519
chr13	24451661	24452560	STAT5_hi_dDHS	Peak_16488	chr13	24451895	24452147	17103	252
chr13	24469321	24470140	STAT5_hi_dDHS	Peak_16491	chr13	24469423	24469835	17106	412
chr13	24470221	24470540	STAT5_hi_dDHS	Peak_16492	chr13	24470120	24470494	17107	273
chr13	30325141	30325660	STAT5_hi_dDHS	Peak_16628	chr13	30325197	30325542	17241	345
chr13	30327021	30327540	STAT5_hi_dDHS	Peak_16629	chr13	30327063	30327269	17242	206
chr13	30439981	30440720	STAT5_hi_dDHS	Peak_16639	chr13	30439969	30440533	17251	552
chr13	31270021	31271040	STAT5_hi_dDHS	Peak_16664	chr13	31269994	31271862	17271	1019
chr13	31314561	31315220	STAT5_hi_dDHS	Peak_16666	chr13	31314662	31315364	17272	558
chr13	31420461	31421140	STAT5_hi_dDHS	Peak_16668	chr13	31420472	31421255	17274	668
chr13	31438021	31438600	STAT5_hi_dDHS	Peak_16669	chr13	31437990	31438530	17276	509
chr13	31438721	31439340	STAT5_hi_dDHS	Peak_16670	chr13	31438809	31439353	17277	531
chr13	31492081	31492620	STAT5_hi_dDHS	Peak_16672	chr13	31492129	31492593	17278	464
chr13	31638441	31640260	STAT5_hi_dDHS	Peak_16686	chr13	31638321	31640093	17292	1652
chr13	31642101	31642600	STAT5_hi_dDHS	Peak_16687	chr13	31642156	31642372	17293	216
chr13	32284901	32285520	STAT5_hi_dDHS	Peak_16705	chr13	32285285	32285484	17306	199
chr13	34204101	34204700	STAT5_hi_dDHS	Peak_16747	chr13	34204275	34204560	17355	285
chr13	34319701	34320520	STAT5_hi_dDHS	Peak_16755	chr13	34319800	34320495	17362	695
chr13	34379221	34380100	STAT5_hi_dDHS	Peak_16763	chr13	34379203	34380024	17370	803
chr13	34880881	34881460	STAT5_hi_dDHS	Peak_16796	chr13	34881045	34881503	17401	415
chr13	35053181	35053780	STAT5_hi_dDHS	Peak_16802	chr13	35052988	35053621	17406	440
chr13	35082341	35082920	STAT5_hi_dDHS	Peak_16805	chr13	35082444	35082949	17408	476
chr13	36745381	36745860	STAT5_hi_dDHS	Peak_16875	.	-1	-1	.	0
chr13	37695161	37696100	STAT5_hi_dDHS	Peak_16917	chr13	37695408	37695806	17504	398
chr13	37763081	37763400	STAT5_hi_dDHS	Peak_16926	chr13	37763098	37763283	17515	185
chr13	39461981	39462460	STAT5_hi_dDHS	Peak_17016	chr13	39461749	39462349	17606	368
chr13	40985961	40986500	STAT5_hi_dDHS	Peak_17051	chr13	40985814	40986385	17638	424
chr13	41008641	41009360	STAT5_hi_dDHS	Peak_17054	chr13	41008669	41009404	17641	691
chr13	41011981	41012840	STAT5_hi_dDHS	Peak_17055	chr13	41012083	41012574	17643	491
chr13	41505641	41506300	STAT5_hi_dDHS	Peak_17097	chr13	41505756	41506251	17692	495
chr13	41908361	41909140	STAT5_hi_dDHS	Peak_17116	chr13	41908653	41909001	17706	348
chr13	42183501	42184240	STAT5_hi_dDHS	Peak_17131	chr13	42183584	42184182	17718	598
chr13	43574041	43574260	STAT5_hi_dDHS	Peak_17183	.	-1	-1	.	0
chr13	43625941	43626900	STAT5_hi_dDHS	Peak_17190	chr13	43626291	43627573	17760	609
chr13	44503961	44505100	STAT5_hi_dDHS	Peak_17234	chr13	44504004	44505281	17802	1096
chr13	44532741	44533640	STAT5_hi_dDHS	Peak_17238	chr13	44533078	44533318	17805	240
chr13	44541061	44541500	STAT5_hi_dDHS	Peak_17239	chr13	44541170	44541491	17806	321
chr13	44546741	44547540	STAT5_hi_dDHS	Peak_17241	chr13	44546709	44547369	17808	628
chr13	46045721	46046700	STAT5_hi_dDHS	Peak_17285	chr13	46045923	46046918	17848	777
chr13	46050741	46051680	STAT5_hi_dDHS	Peak_17286	chr13	46050919	46051477	17849	558
chr13	46053441	46054200	STAT5_hi_dDHS	Peak_17287	chr13	46053632	46054090	17850	458
chr13	46055541	46056380	STAT5_hi_dDHS	Peak_17288	chr13	46055642	46056255	17851	613
chr13	46114541	46115620	STAT5_hi_dDHS	Peak_17293	chr13	46114229	46115685	17858	1079
chr13	46146601	46147360	STAT5_hi_dDHS	Peak_17297	chr13	46146833	46147143	17862	310
chr13	46147681	46147980	STAT5_hi_dDHS	Peak_17298	chr13	46147590	46147967	17863	286
chr13	46248621	46249240	STAT5_hi_dDHS	Peak_17302	chr13	46248661	46249186	17866	525
chr13	46260181	46260880	STAT5_hi_dDHS	Peak_17304	chr13	46260306	46261105	17868	574
chr13	47354441	47355480	STAT5_hi_dDHS	Peak_17373	chr13	47354670	47355518	17935	810
chr13	51943721	51945180	STAT5_hi_dDHS	Peak_17475	.	-1	-1	.	0
chr13	51952581	51953100	STAT5_hi_dDHS	Peak_17476	chr13	51952592	51952947	18053	355
chr13	52006541	52007560	STAT5_hi_dDHS	Peak_17484	chr13	52006617	52007503	18061	886
chr13	52117001	52117840	STAT5_hi_dDHS	Peak_17494	chr13	52116672	52118370	18069	839
chr13	52155561	52156620	STAT5_hi_dDHS	Peak_17501	chr13	52155278	52156504	18076	943
chr13	52163261	52164260	STAT5_hi_dDHS	Peak_17502	chr13	52163150	52164853	18079	999
chr13	52164441	52164980	STAT5_hi_dDHS	Peak_17503	chr13	52163150	52164853	18079	412
chr13	52248061	52250040	STAT5_hi_dDHS	Peak_17509	.	-1	-1	.	0
chr13	52275521	52275720	STAT5_hi_dDHS	Peak_17511	chr13	52275331	52275788	18086	199
chr13	52276921	52277240	STAT5_hi_dDHS	Peak_17512	.	-1	-1	.	0
chr13	52987381	52987980	STAT5_hi_dDHS	Peak_17538	chr13	52987405	52987622	18109	217
chr13	56673161	56673540	STAT5_hi_dDHS	Peak_17703	chr13	56672925	56673326	18292	165
chr13	60674781	60676180	STAT5_hi_dDHS	Peak_17811	chr13	60674926	60676262	18408	1254
chr13	60784141	60784960	STAT5_hi_dDHS	Peak_17824	chr13	60783961	60785195	18425	819
chr13	62574061	62574420	STAT5_hi_dDHS	Peak_17837	.	-1	-1	.	0
chr13	62973081	62973520	STAT5_hi_dDHS	Peak_17840	chr13	62972865	62973434	18462	353
chr13	63392161	63392980	STAT5_hi_dDHS	Peak_17873	chr13	63391940	63392817	18506	656
chr13	63426221	63426980	STAT5_hi_dDHS	Peak_17878	chr13	63426273	63427035	18517	707
chr13	63649761	63650620	STAT5_hi_dDHS	Peak_17889	chr13	63649868	63650425	18525	557
chr13	63767061	63767340	STAT5_hi_dDHS	Peak_17895	chr13	63766983	63767246	18533	185
chr13	64450721	64451160	STAT5_hi_dDHS	Peak_17943	chr13	64450661	64451098	18577	377
chr13	74945941	74946500	STAT5_hi_dDHS	Peak_18121	chr13	74945854	74946310	18769	369
chr13	75051301	75051660	STAT5_hi_dDHS	Peak_18125	.	-1	-1	.	0
chr13	75196241	75196600	STAT5_hi_dDHS	Peak_18127	chr13	75196368	75196614	18772	232
chr13	75504301	75504920	STAT5_hi_dDHS	Peak_18136	chr13	75504331	75504897	18776	566
chr13	82365241	82365560	STAT5_hi_dDHS	Peak_18233	chr13	82365369	82365619	18863	191
chr13	89922341	89923020	STAT5_hi_dDHS	Peak_18273	chr13	89922391	89922891	18883	500
chr13	90127481	90127980	STAT5_hi_dDHS	Peak_18278	.	-1	-1	.	0
chr13	90602921	90603400	STAT5_hi_dDHS	Peak_18283	chr13	90603073	90603284	18889	211
chr13	91364001	91364540	STAT5_hi_dDHS	Peak_18308	chr13	91363183	91364397	18903	396
chr13	91887921	91888560	STAT5_hi_dDHS	Peak_18318	chr13	91887246	91888491	18912	570
chr13	93429921	93430520	STAT5_hi_dDHS	Peak_18344	chr13	93430078	93430372	18938	294
chr13	94459361	94460000	STAT5_hi_dDHS	Peak_18384	chr13	94459385	94460391	18979	615
chr13	95055881	95056260	STAT5_hi_dDHS	Peak_18420	chr13	95054510	95056031	19011	150
chr13	96652021	96652360	STAT5_hi_dDHS	Peak_18491	chr13	96651988	96652307	19060	286
chr13	96692561	96693020	STAT5_hi_dDHS	Peak_18498	chr13	96692586	96692946	19067	360
chr13	97729861	97730800	STAT5_hi_dDHS	Peak_18529	chr13	97730002	97730754	19096	752
chr13	98623281	98623840	STAT5_hi_dDHS	Peak_18572	chr13	98623233	98624005	19140	559
chr13	99693181	99693700	STAT5_hi_dDHS	Peak_18608	.	-1	-1	.	0
chr13	100436761	100437420	STAT5_hi_dDHS	Peak_18624	chr13	100436920	100437308	19186	388
chr13	101611641	101612120	STAT5_hi_dDHS	Peak_18664	chr13	101611641	101612436	19223	479
chr13	102283161	102283680	STAT5_hi_dDHS	Peak_18685	chr13	102283384	102283619	19244	235
chr13	102293201	102294000	STAT5_hi_dDHS	Peak_18686	chr13	102293395	102293857	19245	462
chr13	102487881	102489680	STAT5_hi_dDHS	Peak_18698	chr13	102488477	102489458	19259	981
chr13	102516101	102516500	STAT5_hi_dDHS	Peak_18705	chr13	102516076	102516475	19270	374
chr13	102617781	102618580	STAT5_hi_dDHS	Peak_18718	chr13	102617798	102618818	19285	782
chr13	103667121	103667560	STAT5_hi_dDHS	Peak_18757	chr13	103667238	103667621	19316	322
chr13	103670821	103671100	STAT5_hi_dDHS	Peak_18758	.	-1	-1	.	0
chr13	104289401	104290140	STAT5_hi_dDHS	Peak_18768	chr13	104289425	104290026	19323	601
chr13	104392621	104393020	STAT5_hi_dDHS	Peak_18774	chr13	104391940	104392764	19328	143
chr13	105077881	105078480	STAT5_hi_dDHS	Peak_18804	.	-1	-1	.	0
chr13	105879261	105879680	STAT5_hi_dDHS	Peak_18822	chr13	105879417	105879606	19364	189
chr13	109238621	109239000	STAT5_hi_dDHS	Peak_18884	chr13	109238652	109239058	19417	348
chr13	109509061	109509560	STAT5_hi_dDHS	Peak_18889	.	-1	-1	.	0
chr13	110442801	110443300	STAT5_hi_dDHS	Peak_18924	chr13	110442910	110443211	19447	301
chr13	112512181	112512680	STAT5_hi_dDHS	Peak_18981	.	-1	-1	.	0
chr13	113072541	113073160	STAT5_hi_dDHS	Peak_19027	chr13	113072788	113072957	19532	169
chr13	113106781	113107740	STAT5_hi_dDHS	Peak_19032	chr13	113106903	113108142	19536	837
chr13	113144501	113144820	STAT5_hi_dDHS	Peak_19038	chr13	113144338	113144766	19542	265
chr13	113181501	113181940	STAT5_hi_dDHS	Peak_19043	chr13	113181676	113181777	19546	101
chr13	114208321	114209020	STAT5_hi_dDHS	Peak_19089	chr13	114208255	114208902	19580	581
chr13	114876181	114877560	STAT5_hi_dDHS	Peak_19131	chr13	114876509	114877427	19615	918
chr13	115150901	115151380	STAT5_hi_dDHS	Peak_19136	chr13	115151151	115151462	19619	229
chr13	115599821	115600460	STAT5_hi_dDHS	Peak_19157	chr13	115600165	115600383	19637	218
chr13	118467801	118468260	STAT5_hi_dDHS	Peak_19206	chr13	118467849	118468183	19664	334
chr14	8657021	8657760	STAT5_hi_dDHS	Peak_19228	chr14	8657154	8657641	19682	487
chr14	9136401	9137000	STAT5_hi_dDHS	Peak_19275	chr14	9136332	9137281	19759	599
chr14	9189301	9189800	STAT5_hi_dDHS	Peak_19282	chr14	9189217	9190057	19768	499
chr14	9230941	9231460	STAT5_hi_dDHS	Peak_19284	chr14	9230938	9231410	19769	469
chr14	9258181	9259140	STAT5_hi_dDHS	Peak_19285	chr14	9258536	9258796	19770	260
chr14	9262461	9262840	STAT5_hi_dDHS	Peak_19286	.	-1	-1	.	0
chr14	9262921	9263780	STAT5_hi_dDHS	Peak_19287	chr14	9263309	9263765	19771	456
chr14	9287081	9287440	STAT5_hi_dDHS	Peak_19288	.	-1	-1	.	0
chr14	10453581	10453840	STAT5_hi_dDHS	Peak_19294	chr14	10453265	10453861	19777	259
chr14	11346401	11346880	STAT5_hi_dDHS	Peak_19303	chr14	11346537	11346872	19780	335
chr14	11582581	11583920	STAT5_hi_dDHS	Peak_19306	chr14	11582761	11583801	19781	1040
chr14	12715741	12716220	STAT5_hi_dDHS	Peak_19347	.	-1	-1	.	0
chr14	17402541	17402900	STAT5_hi_dDHS	Peak_19406	chr14	17402432	17402872	19855	331
chr14	17405821	17406420	STAT5_hi_dDHS	Peak_19407	chr14	17405554	17406762	19856	599
chr14	18557561	18558260	STAT5_hi_dDHS	Peak_19429	chr14	18557717	18558185	19877	468
chr14	18561321	18562180	STAT5_hi_dDHS	Peak_19430	chr14	18561396	18562050	19878	654
chr14	19201441	19202120	STAT5_hi_dDHS	Peak_19462	.	-1	-1	.	0
chr14	20626421	20627120	STAT5_hi_dDHS	Peak_19485	chr14	20626590	20627558	19935	530
chr14	21781681	21782480	STAT5_hi_dDHS	Peak_19568	chr14	21782208	21782434	20016	226
chr14	22339741	22340040	STAT5_hi_dDHS	Peak_19601	.	-1	-1	.	0
chr14	22369061	22369440	STAT5_hi_dDHS	Peak_19603	chr14	22369059	22369374	20058	313
chr14	23609901	23610220	STAT5_hi_dDHS	Peak_19648	chr14	23610177	23610452	20102	43
chr14	26327661	26328340	STAT5_hi_dDHS	Peak_19696	chr14	26327920	26329814	20148	420
chr14	26553681	26554060	STAT5_hi_dDHS	Peak_19723	chr14	26553658	26554388	20181	379
chr14	28121841	28122300	STAT5_hi_dDHS	Peak_19783	.	-1	-1	.	0
chr14	28471561	28472320	STAT5_hi_dDHS	Peak_19811	chr14	28471777	28472068	20279	291
chr14	29452141	29452760	STAT5_hi_dDHS	Peak_19831	chr14	29452031	29452749	20291	608
chr14	30789981	30790800	STAT5_hi_dDHS	Peak_19852	chr14	30789491	30790844	20317	819
chr14	31489561	31489920	STAT5_hi_dDHS	Peak_19893	.	-1	-1	.	0
chr14	31681581	31682760	STAT5_hi_dDHS	Peak_19906	chr14	31681801	31683182	20375	959
chr14	31717041	31718360	STAT5_hi_dDHS	Peak_19913	chr14	31717464	31718075	20388	611
chr14	31718401	31719960	STAT5_hi_dDHS	Peak_19914	chr14	31719079	31719544	20389	465
chr14	31738821	31739180	STAT5_hi_dDHS	Peak_19918	chr14	31738739	31738974	20395	153
chr14	35167641	35168180	STAT5_hi_dDHS	Peak_20057	.	-1	-1	.	0
chr14	38677041	38677420	STAT5_hi_dDHS	Peak_20128	.	-1	-1	.	0
chr14	40078261	40078900	STAT5_hi_dDHS	Peak_20134	chr14	40078379	40078905	20633	521
chr14	41740321	41740880	STAT5_hi_dDHS	Peak_20145	chr14	41740276	41740733	20643	412
chr14	41842481	41843040	STAT5_hi_dDHS	Peak_20157	chr14	41842596	41842917	20653	321
chr14	41931041	41931580	STAT5_hi_dDHS	Peak_20169	chr14	41931079	41931714	20676	501
chr14	41953801	41954500	STAT5_hi_dDHS	Peak_20173	chr14	41953951	41954343	20685	392
chr14	46164561	46165100	STAT5_hi_dDHS	Peak_20211	chr14	46164607	46164947	20743	340
chr14	46327301	46327880	STAT5_hi_dDHS	Peak_20220	chr14	46326934	46327630	20754	329
chr14	46611641	46612900	STAT5_hi_dDHS	Peak_20229	chr14	46611396	46612791	20760	1150
chr14	46840101	46840760	STAT5_hi_dDHS	Peak_20240	.	-1	-1	.	0
chr14	46879261	46880020	STAT5_hi_dDHS	Peak_20245	chr14	46879391	46880519	20769	629
chr14	48602801	48603400	STAT5_hi_dDHS	Peak_20325	chr14	48603094	48603348	20847	254
chr14	51617661	51618400	STAT5_hi_dDHS	Peak_20381	chr14	51617763	51618387	20898	624
chr14	51702781	51703860	STAT5_hi_dDHS	Peak_20388	chr14	51702301	51703743	20903	962
chr14	51713061	51713880	STAT5_hi_dDHS	Peak_20390	chr14	51713159	51713671	20905	512
chr14	51725481	51725880	STAT5_hi_dDHS	Peak_20393	chr14	51725462	51725609	20915	128
chr14	55297461	55298180	STAT5_hi_dDHS	Peak_20478	chr14	55297520	55298179	21002	659
chr14	55642701	55643320	STAT5_hi_dDHS	Peak_20494	.	-1	-1	.	0
chr14	55765661	55766580	STAT5_hi_dDHS	Peak_20502	chr14	55765649	55766575	21028	914
chr14	56331941	56332620	STAT5_hi_dDHS	Peak_20531	.	-1	-1	.	0
chr14	57237841	57238180	STAT5_hi_dDHS	Peak_20568	.	-1	-1	.	0
chr14	57986081	57986620	STAT5_hi_dDHS	Peak_20591	chr14	57986238	57986604	21123	366
chr14	58785461	58786140	STAT5_hi_dDHS	Peak_20622	chr14	58785545	58785880	21150	335
chr14	61267841	61268200	STAT5_hi_dDHS	Peak_20667	chr14	61267789	61268092	21198	251
chr14	61306061	61306560	STAT5_hi_dDHS	Peak_20672	chr14	61306177	61306468	21204	291
chr14	63126881	63127780	STAT5_hi_dDHS	Peak_20748	chr14	63126978	63127658	21281	680
chr14	63498921	63499260	STAT5_hi_dDHS	Peak_20770	chr14	63498962	63499228	21294	266
chr14	63722781	63723140	STAT5_hi_dDHS	Peak_20783	chr14	63722829	63723225	21305	311
chr14	63851721	63852040	STAT5_hi_dDHS	Peak_20804	.	-1	-1	.	0
chr14	64854201	64854600	STAT5_hi_dDHS	Peak_20851	chr14	64854096	64854517	21389	316
chr14	65460581	65461020	STAT5_hi_dDHS	Peak_20880	chr14	65460736	65460972	21421	236
chr14	66334841	66335620	STAT5_hi_dDHS	Peak_20930	chr14	66334927	66335513	21466	586
chr14	66337961	66338680	STAT5_hi_dDHS	Peak_20932	chr14	66338006	66339839	21468	674
chr14	66339021	66339840	STAT5_hi_dDHS	Peak_20933	chr14	66338006	66339839	21468	818
chr14	66456521	66457300	STAT5_hi_dDHS	Peak_20946	chr14	66455947	66457210	21479	689
chr14	66601421	66602220	STAT5_hi_dDHS	Peak_20959	chr14	66601270	66601913	21497	492
chr14	70026121	70026660	STAT5_hi_dDHS	Peak_21062	chr14	70026130	70026444	21599	314
chr14	70028521	70028920	STAT5_hi_dDHS	Peak_21064	chr14	70028516	70028702	21601	181
chr14	70082881	70083640	STAT5_hi_dDHS	Peak_21067	chr14	70083068	70083430	21604	362
chr14	70129181	70129900	STAT5_hi_dDHS	Peak_21069	chr14	70129406	70130056	21607	494
chr14	70722521	70723240	STAT5_hi_dDHS	Peak_21105	chr14	70722637	70723116	21648	479
chr14	70731181	70731860	STAT5_hi_dDHS	Peak_21108	chr14	70731062	70731882	21650	679
chr14	70737721	70738460	STAT5_hi_dDHS	Peak_21110	chr14	70737692	70737886	21655	165
chr14	73533741	73534360	STAT5_hi_dDHS	Peak_21179	chr14	73533703	73534253	21735	512
chr14	73558821	73559500	STAT5_hi_dDHS	Peak_21182	chr14	73558911	73559544	21742	589
chr14	73561701	73562580	STAT5_hi_dDHS	Peak_21183	chr14	73561833	73562659	21743	747
chr14	75193841	75194500	STAT5_hi_dDHS	Peak_21226	chr14	75194012	75194329	21797	317
chr14	75194701	75195180	STAT5_hi_dDHS	Peak_21227	chr14	75194685	75195213	21798	479
chr14	75550121	75550760	STAT5_hi_dDHS	Peak_21250	chr14	75550522	75551240	21816	238
chr14	75632501	75633780	STAT5_hi_dDHS	Peak_21256	chr14	75632726	75633456	21821	730
chr14	75636641	75637500	STAT5_hi_dDHS	Peak_21257	chr14	75636943	75637240	21822	297
chr14	75648961	75650060	STAT5_hi_dDHS	Peak_21259	chr14	75649682	75650620	21826	378
chr14	75650341	75650680	STAT5_hi_dDHS	Peak_21260	chr14	75649682	75650620	21826	279
chr14	76226481	76227240	STAT5_hi_dDHS	Peak_21277	chr14	76226577	76227146	21846	569
chr14	76549301	76550120	STAT5_hi_dDHS	Peak_21292	chr14	76549442	76550044	21859	602
chr14	77029961	77030340	STAT5_hi_dDHS	Peak_21313	chr14	77029821	77030252	21875	291
chr14	77131181	77131920	STAT5_hi_dDHS	Peak_21323	chr14	77131335	77131992	21882	585
chr14	77417001	77417560	STAT5_hi_dDHS	Peak_21347	chr14	77417131	77417501	21911	370
chr14	79904041	79904440	STAT5_hi_dDHS	Peak_21385	.	-1	-1	.	0
chr14	86700341	86701080	STAT5_hi_dDHS	Peak_21411	chr14	86700385	86700930	21963	545
chr14	86701461	86701840	STAT5_hi_dDHS	Peak_21412	.	-1	-1	.	0
chr14	94053481	94053920	STAT5_hi_dDHS	Peak_21465	.	-1	-1	.	0
chr14	103862661	103863620	STAT5_hi_dDHS	Peak_21579	chr14	103862918	103863618	22061	700
chr14	105654921	105655280	STAT5_hi_dDHS	Peak_21602	chr14	105654865	105655486	22075	359
chr14	106202761	106203060	STAT5_hi_dDHS	Peak_21621	chr14	106202162	106202958	22088	197
chr14	115365081	115365740	STAT5_hi_dDHS	Peak_21653	chr14	115365163	115365548	22109	385
chr14	116707421	116707860	STAT5_hi_dDHS	Peak_21665	.	-1	-1	.	0
chr14	116847201	116848240	STAT5_hi_dDHS	Peak_21671	chr14	116847311	116848008	22119	697
chr14	119348121	119348460	STAT5_hi_dDHS	Peak_21739	chr14	119348155	119348395	22178	240
chr14	119351121	119351800	STAT5_hi_dDHS	Peak_21740	chr14	119350997	119351762	22179	641
chr14	120754681	120755300	STAT5_hi_dDHS	Peak_21770	chr14	120754364	120755561	22209	619
chr14	121636821	121637440	STAT5_hi_dDHS	Peak_21812	chr14	121636770	121637339	22253	518
chr14	121638501	121639100	STAT5_hi_dDHS	Peak_21813	chr14	121637876	121638855	22254	354
chr14	121650561	121651380	STAT5_hi_dDHS	Peak_21814	chr14	121650928	121651310	22256	382
chr14	122506781	122507460	STAT5_hi_dDHS	Peak_21861	chr14	122505956	122507168	22309	387
chr15	3551581	3552340	STAT5_hi_dDHS	Peak_21950	chr15	3551728	3552103	22402	375
chr15	3557721	3558540	STAT5_hi_dDHS	Peak_21951	chr15	3557923	3558546	22403	617
chr15	3567941	3568980	STAT5_hi_dDHS	Peak_21952	chr15	3568221	3568774	22404	553
chr15	3570121	3571080	STAT5_hi_dDHS	Peak_21953	chr15	3570414	3570755	22405	341
chr15	3589801	3590840	STAT5_hi_dDHS	Peak_21954	chr15	3590036	3590659	22406	623
chr15	3670481	3671360	STAT5_hi_dDHS	Peak_21956	chr15	3670742	3671118	22407	376
chr15	4668061	4668780	STAT5_hi_dDHS	Peak_21975	chr15	4667970	4668941	22418	719
chr15	4676601	4677680	STAT5_hi_dDHS	Peak_21977	chr15	4676867	4678044	22420	813
chr15	6009501	6010240	STAT5_hi_dDHS	Peak_22000	.	-1	-1	.	0
chr15	6392261	6393240	STAT5_hi_dDHS	Peak_22021	chr15	6392268	6392972	22449	704
chr15	6841961	6842300	STAT5_hi_dDHS	Peak_22042	.	-1	-1	.	0
chr15	7085621	7086580	STAT5_hi_dDHS	Peak_22052	chr15	7085645	7086506	22484	861
chr15	7193181	7193700	STAT5_hi_dDHS	Peak_22064	.	-1	-1	.	0
chr15	8038441	8039060	STAT5_hi_dDHS	Peak_22070	chr15	8038734	8039081	22537	326
chr15	9532041	9532800	STAT5_hi_dDHS	Peak_22122	.	-1	-1	.	0
chr15	10131981	10132640	STAT5_hi_dDHS	Peak_22128	chr15	10131986	10133107	22588	654
chr15	10153221	10154160	STAT5_hi_dDHS	Peak_22133	chr15	10153257	10154010	22593	753
chr15	10561741	10562760	STAT5_hi_dDHS	Peak_22162	.	-1	-1	.	0
chr15	10648441	10649000	STAT5_hi_dDHS	Peak_22171	chr15	10648417	10648967	22630	526
chr15	11209381	11210000	STAT5_hi_dDHS	Peak_22201	chr15	11209101	11209912	22660	531
chr15	11312401	11312880	STAT5_hi_dDHS	Peak_22205	chr15	11312226	11312935	22663	479
chr15	11324281	11324500	STAT5_hi_dDHS	Peak_22206	chr15	11324033	11324474	22666	193
chr15	12123501	12124000	STAT5_hi_dDHS	Peak_22226	chr15	12123438	12125057	22690	499
chr15	13775621	13776040	STAT5_hi_dDHS	Peak_22250	chr15	13775614	13775954	22713	333
chr15	25460761	25461360	STAT5_hi_dDHS	Peak_22292	.	-1	-1	.	0
chr15	26285201	26285540	STAT5_hi_dDHS	Peak_22335	.	-1	-1	.	0
chr15	26308741	26309020	STAT5_hi_dDHS	Peak_22337	.	-1	-1	.	0
chr15	27308401	27309240	STAT5_hi_dDHS	Peak_22348	.	-1	-1	.	0
chr15	27556221	27557160	STAT5_hi_dDHS	Peak_22371	.	-1	-1	.	0
chr15	27911841	27912460	STAT5_hi_dDHS	Peak_22393	chr15	27911889	27912396	22839	507
chr15	28768541	28769220	STAT5_hi_dDHS	Peak_22411	.	-1	-1	.	0
chr15	28836161	28836620	STAT5_hi_dDHS	Peak_22412	.	-1	-1	.	0
chr15	31164961	31166040	STAT5_hi_dDHS	Peak_22426	chr15	31165013	31166669	22862	1027
chr15	31187861	31188460	STAT5_hi_dDHS	Peak_22432	chr15	31187655	31188659	22870	599
chr15	35306901	35307380	STAT5_hi_dDHS	Peak_22536	.	-1	-1	.	0
chr15	36349341	36350340	STAT5_hi_dDHS	Peak_22570	chr15	36349274	36350399	23006	999
chr15	36828501	36829260	STAT5_hi_dDHS	Peak_22607	chr15	36828266	36829158	23046	657
chr15	36889801	36890480	STAT5_hi_dDHS	Peak_22613	chr15	36890118	36890925	23050	362
chr15	36913241	36913660	STAT5_hi_dDHS	Peak_22615	chr15	36913327	36913755	23053	333
chr15	37387381	37387760	STAT5_hi_dDHS	Peak_22631	chr15	37387456	37387694	23064	238
chr15	37388441	37389320	STAT5_hi_dDHS	Peak_22632	.	-1	-1	.	0
chr15	37987341	37987700	STAT5_hi_dDHS	Peak_22649	chr15	37987371	37987623	23081	252
chr15	37997001	37997460	STAT5_hi_dDHS	Peak_22651	chr15	37996705	37997645	23083	459
chr15	38277301	38277960	STAT5_hi_dDHS	Peak_22668	chr15	38277343	38277852	23100	509
chr15	38278361	38278900	STAT5_hi_dDHS	Peak_22669	chr15	38278439	38278915	23101	461
chr15	38400521	38401260	STAT5_hi_dDHS	Peak_22680	chr15	38399973	38401332	23111	739
chr15	38948341	38948820	STAT5_hi_dDHS	Peak_22711	.	-1	-1	.	0
chr15	41555821	41556300	STAT5_hi_dDHS	Peak_22769	chr15	41555837	41556415	23183	463
chr15	41779481	41780660	STAT5_hi_dDHS	Peak_22789	chr15	41780255	41781083	23200	405
chr15	41793481	41793860	STAT5_hi_dDHS	Peak_22791	.	-1	-1	.	0
chr15	52944401	52944680	STAT5_hi_dDHS	Peak_22908	chr15	52944420	52944847	23276	260
chr15	52994561	52995300	STAT5_hi_dDHS	Peak_22913	chr15	52994649	52994997	23282	348
chr15	53000181	53000960	STAT5_hi_dDHS	Peak_22916	chr15	52999882	53000843	23286	662
chr15	53027761	53028340	STAT5_hi_dDHS	Peak_22919	chr15	53027723	53028308	23288	547
chr15	53031241	53032220	STAT5_hi_dDHS	Peak_22920	chr15	53031488	53032080	23289	592
chr15	54409041	54410160	STAT5_hi_dDHS	Peak_22952	chr15	54409339	54409822	23321	483
chr15	54418341	54419180	STAT5_hi_dDHS	Peak_22954	chr15	54418357	54419002	23322	645
chr15	54874381	54875580	STAT5_hi_dDHS	Peak_22974	chr15	54874657	54875615	23340	923
chr15	54877881	54878940	STAT5_hi_dDHS	Peak_22975	chr15	54878123	54878803	23342	680
chr15	54964901	54965520	STAT5_hi_dDHS	Peak_22986	chr15	54964162	54965373	23356	472
chr15	54984401	54985420	STAT5_hi_dDHS	Peak_22990	chr15	54984432	54985100	23361	668
chr15	55029061	55030160	STAT5_hi_dDHS	Peak_22992	chr15	55029275	55030180	23365	885
chr15	55031641	55032060	STAT5_hi_dDHS	Peak_22993	chr15	55031666	55031920	23366	254
chr15	56249721	56249960	STAT5_hi_dDHS	Peak_23040	.	-1	-1	.	0
chr15	58823961	58824520	STAT5_hi_dDHS	Peak_23117	chr15	58823791	58824610	23501	559
chr15	58858081	58858600	STAT5_hi_dDHS	Peak_23123	.	-1	-1	.	0
chr15	58972161	58974600	STAT5_hi_dDHS	Peak_23144	chr15	58972298	58973664	23542	1366
chr15	59312021	59313740	STAT5_hi_dDHS	Peak_23173	chr15	59311959	59313184	23562	1163
chr15	59343001	59343560	STAT5_hi_dDHS	Peak_23175	chr15	59343034	59343479	23563	445
chr15	59383861	59384600	STAT5_hi_dDHS	Peak_23180	chr15	59384019	59384311	23566	292
chr15	59559681	59560220	STAT5_hi_dDHS	Peak_23200	chr15	59559711	59560092	23592	381
chr15	59576001	59576460	STAT5_hi_dDHS	Peak_23202	chr15	59576169	59576408	23595	239
chr15	60742921	60743360	STAT5_hi_dDHS	Peak_23226	.	-1	-1	.	0
chr15	60825521	60825720	STAT5_hi_dDHS	Peak_23228	chr15	60824948	60826610	23619	199
chr15	60929901	60930780	STAT5_hi_dDHS	Peak_23231	chr15	60929956	60930401	23623	445
chr15	61952461	61952900	STAT5_hi_dDHS	Peak_23259	chr15	61952415	61952999	23654	439
chr15	61953081	61953500	STAT5_hi_dDHS	Peak_23260	chr15	61953221	61953641	23655	279
chr15	61993541	61994500	STAT5_hi_dDHS	Peak_23265	chr15	61993503	61994346	23660	805
chr15	61995361	61996160	STAT5_hi_dDHS	Peak_23266	chr15	61995509	61996065	23661	556
chr15	62035941	62036340	STAT5_hi_dDHS	Peak_23269	chr15	62035820	62036351	23662	399
chr15	62048081	62049140	STAT5_hi_dDHS	Peak_23271	chr15	62048074	62048868	23664	787
chr15	62053941	62054760	STAT5_hi_dDHS	Peak_23272	chr15	62054203	62054725	23665	522
chr15	62176701	62178220	STAT5_hi_dDHS	Peak_23287	chr15	62177144	62178512	23681	1076
chr15	62181181	62182240	STAT5_hi_dDHS	Peak_23288	chr15	62181334	62182236	23682	902
chr15	62364681	62365440	STAT5_hi_dDHS	Peak_23293	chr15	62364769	62365364	23684	595
chr15	62575401	62576300	STAT5_hi_dDHS	Peak_23302	chr15	62575449	62576087	23687	638
chr15	62633821	62634360	STAT5_hi_dDHS	Peak_23305	.	-1	-1	.	0
chr15	63192181	63192560	STAT5_hi_dDHS	Peak_23311	chr15	63192025	63192268	23693	87
chr15	63984101	63984760	STAT5_hi_dDHS	Peak_23328	chr15	63984116	63984853	23712	644
chr15	63995021	63995320	STAT5_hi_dDHS	Peak_23330	chr15	63995125	63996092	23714	195
chr15	63995341	63995560	STAT5_hi_dDHS	Peak_23331	chr15	63995125	63996092	23714	219
chr15	66440921	66441380	STAT5_hi_dDHS	Peak_23375	chr15	66441108	66441327	23756	219
chr15	66441961	66442840	STAT5_hi_dDHS	Peak_23376	chr15	66442337	66442668	23757	331
chr15	66444261	66444860	STAT5_hi_dDHS	Peak_23377	.	-1	-1	.	0
chr15	66876481	66876720	STAT5_hi_dDHS	Peak_23405	chr15	66876549	66877176	23786	171
chr15	66876741	66877040	STAT5_hi_dDHS	Peak_23406	chr15	66876549	66877176	23786	299
chr15	66912261	66913140	STAT5_hi_dDHS	Peak_23411	chr15	66912480	66913040	23792	560
chr15	66993001	66993620	STAT5_hi_dDHS	Peak_23422	chr15	66993049	66993734	23814	571
chr15	67174741	67175240	STAT5_hi_dDHS	Peak_23434	chr15	67174848	67175199	23825	351
chr15	68119221	68119600	STAT5_hi_dDHS	Peak_23456	.	-1	-1	.	0
chr15	74706641	74707260	STAT5_hi_dDHS	Peak_23546	chr15	74706753	74707269	23958	507
chr15	74837441	74837800	STAT5_hi_dDHS	Peak_23561	chr15	74837463	74838047	23977	337
chr15	75136401	75137060	STAT5_hi_dDHS	Peak_23577	chr15	75136490	75136898	23986	408
chr15	75139401	75140400	STAT5_hi_dDHS	Peak_23578	chr15	75139581	75140258	23987	677
chr15	75147361	75148020	STAT5_hi_dDHS	Peak_23581	chr15	75147669	75147996	23991	327
chr15	75186201	75187420	STAT5_hi_dDHS	Peak_23583	chr15	75186533	75187223	23993	690
chr15	75210321	75210700	STAT5_hi_dDHS	Peak_23585	chr15	75210223	75210629	23995	308
chr15	75215201	75215940	STAT5_hi_dDHS	Peak_23587	chr15	75215632	75215780	23997	148
chr15	75226361	75226920	STAT5_hi_dDHS	Peak_23588	chr15	75226538	75228029	23999	382
chr15	75231761	75232940	STAT5_hi_dDHS	Peak_23590	chr15	75231735	75232666	24000	905
chr15	76053861	76054480	STAT5_hi_dDHS	Peak_23657	chr15	76053986	76054491	24081	494
chr15	76414221	76415160	STAT5_hi_dDHS	Peak_23686	chr15	76414409	76415052	24115	643
chr15	77107361	77108000	STAT5_hi_dDHS	Peak_23752	chr15	77107732	77108107	24173	268
chr15	77160241	77160500	STAT5_hi_dDHS	Peak_23755	chr15	77160159	77160612	24176	259
chr15	77196021	77196540	STAT5_hi_dDHS	Peak_23761	.	-1	-1	.	0
chr15	77436401	77436980	STAT5_hi_dDHS	Peak_23773	chr15	77436445	77436841	24202	396
chr15	77742241	77742920	STAT5_hi_dDHS	Peak_23802	chr15	77742215	77743245	24248	679
chr15	78189041	78189800	STAT5_hi_dDHS	Peak_23819	chr15	78189237	78189483	24268	246
chr15	78247101	78248020	STAT5_hi_dDHS	Peak_23826	chr15	78247236	78247903	24277	667
chr15	81077841	81079000	STAT5_hi_dDHS	Peak_23990	.	-1	-1	.	0
chr15	81079521	81080240	STAT5_hi_dDHS	Peak_23991	chr15	81079500	81080364	24479	719
chr15	81224601	81225360	STAT5_hi_dDHS	Peak_24007	chr15	81224759	81224915	24489	156
chr15	83032741	83033300	STAT5_hi_dDHS	Peak_24152	chr15	83032908	83033474	24664	392
chr15	83945361	83945640	STAT5_hi_dDHS	Peak_24186	chr15	83945313	83946419	24714	279
chr15	84469981	84470440	STAT5_hi_dDHS	Peak_24205	chr15	84469897	84470662	24739	459
chr15	86254341	86254940	STAT5_hi_dDHS	Peak_24319	chr15	86254382	86254889	24881	507
chr15	86931581	86932080	STAT5_hi_dDHS	Peak_24325	chr15	86931599	86931961	24887	362
chr15	87060721	87061020	STAT5_hi_dDHS	Peak_24329	chr15	87060714	87061169	24889	299
chr15	90176601	90177080	STAT5_hi_dDHS	Peak_24415	chr15	90176495	90177540	24994	479
chr15	90509001	90509940	STAT5_hi_dDHS	Peak_24426	chr15	90508933	90510827	25002	939
chr15	90839781	90840380	STAT5_hi_dDHS	Peak_24431	chr15	90839918	90840256	25007	338
chr15	93348521	93349260	STAT5_hi_dDHS	Peak_24466	chr15	93348610	93350105	25044	650
chr15	95717661	95718180	STAT5_hi_dDHS	Peak_24504	chr15	95717693	95718209	25082	487
chr15	96430221	96430860	STAT5_hi_dDHS	Peak_24538	chr15	96430322	96430710	25107	388
chr15	96632981	96633320	STAT5_hi_dDHS	Peak_24561	chr15	96632894	96633189	25125	208
chr15	98522621	98523160	STAT5_hi_dDHS	Peak_24666	chr15	98522551	98522913	25244	292
chr15	99545661	99546180	STAT5_hi_dDHS	Peak_24739	chr15	99546024	99547117	25326	156
chr15	100251701	100252320	STAT5_hi_dDHS	Peak_24800	.	-1	-1	.	0
chr15	100489601	100490280	STAT5_hi_dDHS	Peak_24825	chr15	100489617	100490177	25404	560
chr15	100917041	100917700	STAT5_hi_dDHS	Peak_24837	chr15	100917316	100917803	25419	384
chr16	4321281	4321620	STAT5_hi_dDHS	Peak_25032	.	-1	-1	.	0
chr16	4477661	4478120	STAT5_hi_dDHS	Peak_25048	.	-1	-1	.	0
chr16	5135861	5136420	STAT5_hi_dDHS	Peak_25115	.	-1	-1	.	0
chr16	8823701	8824280	STAT5_hi_dDHS	Peak_25174	chr16	8823819	8824082	25769	263
chr16	10639281	10639640	STAT5_hi_dDHS	Peak_25214	chr16	10639143	10639514	25809	233
chr16	10648821	10649720	STAT5_hi_dDHS	Peak_25217	chr16	10648825	10649621	25811	796
chr16	10664001	10664880	STAT5_hi_dDHS	Peak_25219	chr16	10664064	10664831	25812	767
chr16	10675641	10676320	STAT5_hi_dDHS	Peak_25220	chr16	10675758	10675994	25815	236
chr16	10676501	10677560	STAT5_hi_dDHS	Peak_25221	chr16	10676678	10677359	25817	681
chr16	10713281	10713820	STAT5_hi_dDHS	Peak_25225	chr16	10713263	10713920	25820	539
chr16	10844281	10844660	STAT5_hi_dDHS	Peak_25235	.	-1	-1	.	0
chr16	10925681	10926200	STAT5_hi_dDHS	Peak_25240	chr16	10925848	10926232	25834	352
chr16	11171721	11172380	STAT5_hi_dDHS	Peak_25267	chr16	11171860	11172333	25862	473
chr16	11247881	11248340	STAT5_hi_dDHS	Peak_25271	.	-1	-1	.	0
chr16	13330281	13330820	STAT5_hi_dDHS	Peak_25324	chr16	13330317	13330765	25925	448
chr16	13358521	13359700	STAT5_hi_dDHS	Peak_25329	.	-1	-1	.	0
chr16	13866641	13867080	STAT5_hi_dDHS	Peak_25350	chr16	13866855	13867046	25948	191
chr16	14003761	14004600	STAT5_hi_dDHS	Peak_25358	.	-1	-1	.	0
chr16	14950541	14950920	STAT5_hi_dDHS	Peak_25381	chr16	14950486	14950942	25981	379
chr16	15984581	15984880	STAT5_hi_dDHS	Peak_25393	chr16	15984456	15984739	25993	158
chr16	16224521	16224960	STAT5_hi_dDHS	Peak_25401	chr16	16224682	16225503	26002	278
chr16	16225201	16225500	STAT5_hi_dDHS	Peak_25402	chr16	16224682	16225503	26002	299
chr16	18405341	18407500	STAT5_hi_dDHS	Peak_25509	chr16	18407114	18407309	26127	195
chr16	18413181	18414080	STAT5_hi_dDHS	Peak_25511	chr16	18412961	18414133	26130	899
chr16	20021081	20021600	STAT5_hi_dDHS	Peak_25548	.	-1	-1	.	0
chr16	20109561	20109900	STAT5_hi_dDHS	Peak_25552	chr16	20109684	20109838	26170	154
chr16	22918601	22919420	STAT5_hi_dDHS	Peak_25667	chr16	22918550	22919318	26289	717
chr16	22919921	22920740	STAT5_hi_dDHS	Peak_25668	chr16	22919962	22920931	26290	778
chr16	23056221	23056700	STAT5_hi_dDHS	Peak_25685	chr16	23056329	23056590	26308	261
chr16	23187781	23188320	STAT5_hi_dDHS	Peak_25701	chr16	23187926	23188220	26324	294
chr16	23196001	23197100	STAT5_hi_dDHS	Peak_25703	chr16	23196226	23197245	26327	874
chr16	23317921	23318540	STAT5_hi_dDHS	Peak_25714	chr16	23318069	23318386	26342	317
chr16	23326481	23327400	STAT5_hi_dDHS	Peak_25716	chr16	23326635	23327158	26343	523
chr16	23981021	23981900	STAT5_hi_dDHS	Peak_25754	.	-1	-1	.	0
chr16	24077981	24078580	STAT5_hi_dDHS	Peak_25772	chr16	24078170	24078475	26398	305
chr16	24080421	24081240	STAT5_hi_dDHS	Peak_25774	chr16	24080167	24081073	26400	652
chr16	24084361	24085220	STAT5_hi_dDHS	Peak_25775	chr16	24083548	24085018	26401	657
chr16	24186701	24187100	STAT5_hi_dDHS	Peak_25790	.	-1	-1	.	0
chr16	24364181	24364860	STAT5_hi_dDHS	Peak_25812	chr16	24364257	24364681	26428	424
chr16	24476861	24477420	STAT5_hi_dDHS	Peak_25827	chr16	24476974	24477280	26445	306
chr16	24828141	24828760	STAT5_hi_dDHS	Peak_25843	chr16	24828175	24828641	26458	466
chr16	25067381	25067940	STAT5_hi_dDHS	Peak_25860	chr16	25066397	25068051	26476	559
chr16	25804741	25805700	STAT5_hi_dDHS	Peak_25868	chr16	25804916	25805558	26482	642
chr16	26377401	26377940	STAT5_hi_dDHS	Peak_25893	chr16	26377499	26377690	26505	191
chr16	28999521	29000280	STAT5_hi_dDHS	Peak_25949	chr16	28999619	29000177	26553	558
chr16	29903461	29904060	STAT5_hi_dDHS	Peak_25968	chr16	29903481	29904042	26569	561
chr16	30110421	30110960	STAT5_hi_dDHS	Peak_25989	chr16	30110659	30110847	26595	188
chr16	30238781	30239460	STAT5_hi_dDHS	Peak_25998	chr16	30238783	30239509	26606	677
chr16	30792881	30793560	STAT5_hi_dDHS	Peak_26050	chr16	30792894	30793706	26661	666
chr16	31557281	31557820	STAT5_hi_dDHS	Peak_26110	chr16	31557416	31558039	26732	404
chr16	31559341	31560020	STAT5_hi_dDHS	Peak_26112	chr16	31559488	31559893	26733	405
chr16	32555721	32556040	STAT5_hi_dDHS	Peak_26171	chr16	32555633	32556020	26789	299
chr16	32697021	32697460	STAT5_hi_dDHS	Peak_26190	chr16	32696996	32697269	26819	248
chr16	33058721	33059300	STAT5_hi_dDHS	Peak_26212	chr16	33058047	33060006	26839	579
chr16	34320161	34320980	STAT5_hi_dDHS	Peak_26299	chr16	34320242	34321001	26939	738
chr16	34748761	34749460	STAT5_hi_dDHS	Peak_26316	chr16	34748918	34749297	26953	379
chr16	35455981	35456920	STAT5_hi_dDHS	Peak_26360	.	-1	-1	.	0
chr16	35457161	35457720	STAT5_hi_dDHS	Peak_26361	.	-1	-1	.	0
chr16	38100621	38101080	STAT5_hi_dDHS	Peak_26469	.	-1	-1	.	0
chr16	42010141	42010740	STAT5_hi_dDHS	Peak_26530	chr16	42010292	42010556	27167	264
chr16	42947721	42948140	STAT5_hi_dDHS	Peak_26546	.	-1	-1	.	0
chr16	43069621	43070500	STAT5_hi_dDHS	Peak_26557	chr16	43069668	43070425	27180	757
chr16	43072501	43073080	STAT5_hi_dDHS	Peak_26558	chr16	43072883	43073268	27181	197
chr16	43169381	43170120	STAT5_hi_dDHS	Peak_26562	chr16	43169399	43170084	27184	685
chr16	43234121	43235040	STAT5_hi_dDHS	Peak_26566	chr16	43234090	43234711	27188	590
chr16	43247101	43247800	STAT5_hi_dDHS	Peak_26568	chr16	43247166	43247468	27190	302
chr16	43286921	43287880	STAT5_hi_dDHS	Peak_26573	chr16	43286701	43287518	27191	597
chr16	43297721	43299120	STAT5_hi_dDHS	Peak_26574	chr16	43297762	43299010	27192	1248
chr16	43303321	43303940	STAT5_hi_dDHS	Peak_26575	chr16	43303306	43303907	27193	586
chr16	43323681	43324440	STAT5_hi_dDHS	Peak_26576	chr16	43324060	43324369	27194	309
chr16	43328101	43329000	STAT5_hi_dDHS	Peak_26577	chr16	43328322	43328754	27195	432
chr16	43379661	43380120	STAT5_hi_dDHS	Peak_26584	chr16	43379701	43380382	27204	419
chr16	43463381	43463760	STAT5_hi_dDHS	Peak_26591	chr16	43463193	43463499	27210	118
chr16	45270061	45270640	STAT5_hi_dDHS	Peak_26651	chr16	45270309	45270518	27267	209
chr16	45365541	45366100	STAT5_hi_dDHS	Peak_26653	chr16	45365532	45365927	27268	386
chr16	45986301	45987120	STAT5_hi_dDHS	Peak_26682	chr16	45986321	45987177	27301	799
chr16	45990441	45991040	STAT5_hi_dDHS	Peak_26683	chr16	45990500	45991723	27302	540
chr16	46498621	46499160	STAT5_hi_dDHS	Peak_26703	.	-1	-1	.	0
chr16	46833641	46834400	STAT5_hi_dDHS	Peak_26713	chr16	46833684	46834183	27327	499
chr16	46850321	46850860	STAT5_hi_dDHS	Peak_26717	chr16	46850495	46850969	27329	365
chr16	48424161	48424680	STAT5_hi_dDHS	Peak_26727	.	-1	-1	.	0
chr16	48765261	48765660	STAT5_hi_dDHS	Peak_26728	chr16	48765418	48765590	27335	172
chr16	48811861	48812720	STAT5_hi_dDHS	Peak_26733	chr16	48812047	48812437	27337	390
chr16	49770181	49770860	STAT5_hi_dDHS	Peak_26744	chr16	49770550	49770726	27346	176
chr16	49775401	49775980	STAT5_hi_dDHS	Peak_26745	chr16	49775533	49775965	27347	432
chr16	50309561	50310360	STAT5_hi_dDHS	Peak_26765	chr16	50309564	50310151	27369	587
chr16	50528541	50529020	STAT5_hi_dDHS	Peak_26769	chr16	50528622	50529530	27373	398
chr16	52329201	52329980	STAT5_hi_dDHS	Peak_26804	chr16	52329546	52329876	27399	330
chr16	52371901	52372460	STAT5_hi_dDHS	Peak_26808	.	-1	-1	.	0
chr16	56871161	56871800	STAT5_hi_dDHS	Peak_26884	.	-1	-1	.	0
chr16	57127881	57128480	STAT5_hi_dDHS	Peak_26888	chr16	57127875	57128273	27479	392
chr16	57239581	57240060	STAT5_hi_dDHS	Peak_26896	.	-1	-1	.	0
chr16	58454901	58455220	STAT5_hi_dDHS	Peak_26917	chr16	58454695	58455140	27505	239
chr16	59599481	59600080	STAT5_hi_dDHS	Peak_26942	.	-1	-1	.	0
chr16	66041161	66041660	STAT5_hi_dDHS	Peak_26985	chr16	66040863	66041790	27553	499
chr16	70331021	70331600	STAT5_hi_dDHS	Peak_26999	chr16	70331002	70331474	27560	453
chr16	71739241	71739660	STAT5_hi_dDHS	Peak_27018	chr16	71739355	71739670	27568	305
chr16	77551201	77551880	STAT5_hi_dDHS	Peak_27122	chr16	77551300	77551617	27641	317
chr16	81366121	81366560	STAT5_hi_dDHS	Peak_27180	.	-1	-1	.	0
chr16	85704581	85705360	STAT5_hi_dDHS	Peak_27226	.	-1	-1	.	0
chr16	87627921	87628600	STAT5_hi_dDHS	Peak_27286	chr16	87628038	87628489	27779	451
chr16	87636081	87636560	STAT5_hi_dDHS	Peak_27287	chr16	87636225	87636536	27780	311
chr16	87712221	87712600	STAT5_hi_dDHS	Peak_27298	chr16	87712366	87712585	27793	219
chr16	87713261	87713820	STAT5_hi_dDHS	Peak_27299	chr16	87713301	87713779	27794	478
chr16	89496221	89496640	STAT5_hi_dDHS	Peak_27319	chr16	89495951	89496563	27807	342
chr16	90779841	90780360	STAT5_hi_dDHS	Peak_27347	chr16	90779652	90780417	27841	519
chr16	91736241	91736720	STAT5_hi_dDHS	Peak_27399	chr16	91736377	91736720	27896	343
chr16	91784481	91785160	STAT5_hi_dDHS	Peak_27408	chr16	91784563	91784987	27905	424
chr16	91829161	91829840	STAT5_hi_dDHS	Peak_27415	chr16	91829451	91829671	27912	220
chr16	92159421	92159860	STAT5_hi_dDHS	Peak_27433	chr16	92159419	92159947	27930	439
chr16	92398881	92399440	STAT5_hi_dDHS	Peak_27446	.	-1	-1	.	0
chr16	92400001	92400720	STAT5_hi_dDHS	Peak_27447	.	-1	-1	.	0
chr16	92401401	92401820	STAT5_hi_dDHS	Peak_27448	chr16	92401282	92401876	27942	419
chr16	92408001	92408620	STAT5_hi_dDHS	Peak_27449	chr16	92407956	92408470	27944	469
chr16	92429261	92429640	STAT5_hi_dDHS	Peak_27452	chr16	92429297	92429740	27946	343
chr16	92697441	92697760	STAT5_hi_dDHS	Peak_27461	.	-1	-1	.	0
chr16	92965601	92966460	STAT5_hi_dDHS	Peak_27465	chr16	92965632	92966103	27961	471
chr16	93346501	93346920	STAT5_hi_dDHS	Peak_27471	.	-1	-1	.	0
chr16	93822281	93822620	STAT5_hi_dDHS	Peak_27505	chr16	93822239	93822507	28009	226
chr16	93932601	93933420	STAT5_hi_dDHS	Peak_27519	chr16	93932787	93933534	28024	633
chr16	94766201	94766600	STAT5_hi_dDHS	Peak_27554	chr16	94766087	94766479	28058	278
chr16	94850561	94851080	STAT5_hi_dDHS	Peak_27561	chr16	94850627	94850829	28067	202
chr16	95950341	95950960	STAT5_hi_dDHS	Peak_27600	chr16	95950417	95951005	28103	543
chr16	97873621	97874240	STAT5_hi_dDHS	Peak_27676	chr16	97873826	97874158	28170	332
chr17	8470101	8470540	STAT5_hi_dDHS	Peak_27857	chr17	8470134	8470443	28392	309
chr17	8540701	8541400	STAT5_hi_dDHS	Peak_27866	chr17	8540756	8541336	28407	580
chr17	10496761	10497240	STAT5_hi_dDHS	Peak_27901	chr17	10496862	10497133	28444	271
chr17	13202721	13203360	STAT5_hi_dDHS	Peak_27989	chr17	13202892	13203078	28565	186
chr17	13853161	13853860	STAT5_hi_dDHS	Peak_28005	chr17	13853362	13853792	28574	430
chr17	15838641	15838900	STAT5_hi_dDHS	Peak_28071	chr17	15838499	15838835	28653	194
chr17	17512641	17512900	STAT5_hi_dDHS	Peak_28087	chr17	17512622	17512917	28668	259
chr17	23710601	23710960	STAT5_hi_dDHS	Peak_28159	chr17	23710542	23710869	28732	268
chr17	24565761	24566100	STAT5_hi_dDHS	Peak_28215	chr17	24565947	24566482	28788	153
chr17	24807401	24808020	STAT5_hi_dDHS	Peak_28228	chr17	24807317	24807723	28810	322
chr17	25006181	25006560	STAT5_hi_dDHS	Peak_28257	chr17	25006265	25006675	28842	295
chr17	25269761	25270480	STAT5_hi_dDHS	Peak_28278	chr17	25269889	25270565	28879	591
chr17	26725881	26726460	STAT5_hi_dDHS	Peak_28374	chr17	26726014	26726276	28984	262
chr17	28565761	28566560	STAT5_hi_dDHS	Peak_28496	chr17	28565522	28566226	29128	465
chr17	28588121	28588940	STAT5_hi_dDHS	Peak_28500	chr17	28588545	28588702	29136	157
chr17	28596581	28597160	STAT5_hi_dDHS	Peak_28501	chr17	28596726	28597106	29138	380
chr17	28702421	28702720	STAT5_hi_dDHS	Peak_28512	chr17	28702020	28702608	29153	187
chr17	28945601	28946220	STAT5_hi_dDHS	Peak_28528	chr17	28945650	28946391	29168	570
chr17	29536081	29536600	STAT5_hi_dDHS	Peak_28587	chr17	29535746	29536575	29233	494
chr17	29606501	29606860	STAT5_hi_dDHS	Peak_28602	chr17	29606545	29606645	29249	100
chr17	29607221	29607820	STAT5_hi_dDHS	Peak_28603	chr17	29607351	29607796	29250	445
chr17	31461701	31462060	STAT5_hi_dDHS	Peak_28699	chr17	31461573	31462097	29334	359
chr17	31794101	31794640	STAT5_hi_dDHS	Peak_28732	.	-1	-1	.	0
chr17	32008181	32009020	STAT5_hi_dDHS	Peak_28754	chr17	32007421	32008684	29402	503
chr17	32010601	32010840	STAT5_hi_dDHS	Peak_28756	chr17	32010458	32011583	29404	239
chr17	33026861	33027180	STAT5_hi_dDHS	Peak_28814	chr17	33026608	33027078	29475	217
chr17	33071861	33072840	STAT5_hi_dDHS	Peak_28819	chr17	33072104	33072805	29481	701
chr17	34355501	34356180	STAT5_hi_dDHS	Peak_28895	.	-1	-1	.	0
chr17	34960421	34960660	STAT5_hi_dDHS	Peak_28931	chr17	34960274	34960662	29595	239
chr17	34987581	34987880	STAT5_hi_dDHS	Peak_28936	chr17	34986698	34988274	29598	299
chr17	34987961	34988320	STAT5_hi_dDHS	Peak_28937	chr17	34986698	34988274	29598	313
chr17	35913681	35914340	STAT5_hi_dDHS	Peak_29014	chr17	35913759	35914176	29676	417
chr17	37353741	37354000	STAT5_hi_dDHS	Peak_29079	chr17	37353769	37354149	29761	231
chr17	43075461	43075920	STAT5_hi_dDHS	Peak_29103	chr17	43075676	43076002	29782	244
chr17	43076361	43076960	STAT5_hi_dDHS	Peak_29104	.	-1	-1	.	0
chr17	43314101	43314580	STAT5_hi_dDHS	Peak_29115	chr17	43314216	43314564	29793	348
chr17	43407021	43407760	STAT5_hi_dDHS	Peak_29121	.	-1	-1	.	0
chr17	43411881	43412820	STAT5_hi_dDHS	Peak_29122	chr17	43412237	43412814	29801	577
chr17	43446881	43447760	STAT5_hi_dDHS	Peak_29125	chr17	43447054	43447769	29802	706
chr17	43997941	43998700	STAT5_hi_dDHS	Peak_29149	chr17	43997979	43998553	29832	574
chr17	45703281	45703660	STAT5_hi_dDHS	Peak_29185	chr17	45703258	45704670	29860	379
chr17	45703841	45704500	STAT5_hi_dDHS	Peak_29186	chr17	45703258	45704670	29860	659
chr17	46017721	46018200	STAT5_hi_dDHS	Peak_29232	chr17	46017787	46018061	29921	274
chr17	46109061	46109320	STAT5_hi_dDHS	Peak_29239	chr17	46109224	46110683	29930	96
chr17	46109441	46110700	STAT5_hi_dDHS	Peak_29240	chr17	46109224	46110683	29930	1242
chr17	46260761	46261740	STAT5_hi_dDHS	Peak_29261	chr17	46260885	46261623	29952	738
chr17	46275541	46276780	STAT5_hi_dDHS	Peak_29264	chr17	46275749	46276155	29957	406
chr17	46576161	46576560	STAT5_hi_dDHS	Peak_29281	.	-1	-1	.	0
chr17	48637201	48637760	STAT5_hi_dDHS	Peak_29406	chr17	48637327	48637636	30130	309
chr17	49404641	49404860	STAT5_hi_dDHS	Peak_29418	chr17	49404711	49405138	30149	149
chr17	49488501	49489320	STAT5_hi_dDHS	Peak_29425	chr17	49488560	49489399	30153	760
chr17	50283501	50284040	STAT5_hi_dDHS	Peak_29443	chr17	50283506	50284237	30185	534
chr17	50674981	50675400	STAT5_hi_dDHS	Peak_29461	.	-1	-1	.	0
chr17	51130341	51130660	STAT5_hi_dDHS	Peak_29475	.	-1	-1	.	0
chr17	51992321	51992800	STAT5_hi_dDHS	Peak_29485	chr17	51991930	51992519	30224	198
chr17	56146441	56147420	STAT5_hi_dDHS	Peak_29535	chr17	56146432	56146766	30269	325
chr17	56261101	56261820	STAT5_hi_dDHS	Peak_29552	chr17	56261171	56261611	30291	440
chr17	56262941	56263520	STAT5_hi_dDHS	Peak_29553	chr17	56262894	56263620	30292	579
chr17	56350041	56350800	STAT5_hi_dDHS	Peak_29566	chr17	56350202	56350921	30309	598
chr17	57333861	57335360	STAT5_hi_dDHS	Peak_29632	.	-1	-1	.	0
chr17	57340341	57341320	STAT5_hi_dDHS	Peak_29633	chr17	57341112	57341617	30379	208
chr17	57369021	57370040	STAT5_hi_dDHS	Peak_29637	chr17	57369344	57371184	30405	696
chr17	57372061	57372940	STAT5_hi_dDHS	Peak_29638	.	-1	-1	.	0
chr17	57381341	57381900	STAT5_hi_dDHS	Peak_29641	chr17	57381037	57381953	30407	559
chr17	63036781	63037240	STAT5_hi_dDHS	Peak_29666	chr17	63036667	63037147	30428	366
chr17	63360141	63360620	STAT5_hi_dDHS	Peak_29674	chr17	63360300	63360565	30435	265
chr17	63844141	63844760	STAT5_hi_dDHS	Peak_29695	chr17	63844246	63844595	30459	349
chr17	64298021	64298660	STAT5_hi_dDHS	Peak_29704	chr17	64298165	64298507	30466	342
chr17	64990781	64991160	STAT5_hi_dDHS	Peak_29728	chr17	64990650	64991134	30490	353
chr17	65094841	65095560	STAT5_hi_dDHS	Peak_29742	chr17	65094681	65095398	30505	557
chr17	65113481	65113680	STAT5_hi_dDHS	Peak_29745	.	-1	-1	.	0
chr17	65926341	65926740	STAT5_hi_dDHS	Peak_29754	chr17	65926337	65926632	30517	291
chr17	66214241	66214760	STAT5_hi_dDHS	Peak_29770	chr17	66214158	66214506	30531	265
chr17	66289021	66289480	STAT5_hi_dDHS	Peak_29775	chr17	66289284	66289446	30538	162
chr17	66867901	66868280	STAT5_hi_dDHS	Peak_29790	.	-1	-1	.	0
chr17	70304241	70304700	STAT5_hi_dDHS	Peak_29833	chr17	70304300	70304751	30589	400
chr17	70310261	70310660	STAT5_hi_dDHS	Peak_29834	chr17	70310269	70310535	30590	266
chr17	71102861	71103380	STAT5_hi_dDHS	Peak_29851	chr17	71102982	71103436	30602	398
chr17	71514261	71514800	STAT5_hi_dDHS	Peak_29872	chr17	71514356	71514672	30628	316
chr17	71571321	71571880	STAT5_hi_dDHS	Peak_29883	.	-1	-1	.	0
chr17	73253281	73253600	STAT5_hi_dDHS	Peak_29920	chr17	73253332	73254122	30672	268
chr17	74644681	74645060	STAT5_hi_dDHS	Peak_29973	chr17	74644746	74644928	30735	182
chr17	78806601	78807320	STAT5_hi_dDHS	Peak_30041	chr17	78806479	78807276	30786	675
chr17	80472821	80473420	STAT5_hi_dDHS	Peak_30097	.	-1	-1	.	0
chr17	80478781	80479180	STAT5_hi_dDHS	Peak_30098	.	-1	-1	.	0
chr17	80495821	80496400	STAT5_hi_dDHS	Peak_30100	chr17	80495187	80496365	30859	544
chr17	81171241	81171800	STAT5_hi_dDHS	Peak_30147	.	-1	-1	.	0
chr17	81176841	81177540	STAT5_hi_dDHS	Peak_30149	chr17	81176961	81177404	30910	443
chr17	81574081	81574460	STAT5_hi_dDHS	Peak_30166	.	-1	-1	.	0
chr17	83469361	83469820	STAT5_hi_dDHS	Peak_30177	chr17	83469226	83469694	30932	333
chr17	83547641	83547920	STAT5_hi_dDHS	Peak_30181	chr17	83547566	83548253	30937	279
chr17	83740961	83741200	STAT5_hi_dDHS	Peak_30206	chr17	83740453	83741419	30966	239
chr17	83775921	83776940	STAT5_hi_dDHS	Peak_30209	chr17	83776214	83776604	30970	390
chr17	83821361	83821720	STAT5_hi_dDHS	Peak_30212	.	-1	-1	.	0
chr17	83882501	83882900	STAT5_hi_dDHS	Peak_30214	chr17	83882187	83882888	30972	387
chr17	84614541	84615080	STAT5_hi_dDHS	Peak_30268	chr17	84614526	84615439	31049	539
chr17	84685741	84686320	STAT5_hi_dDHS	Peak_30279	chr17	84685926	84686122	31059	196
chr17	84687241	84687800	STAT5_hi_dDHS	Peak_30280	chr17	84687514	84687731	31060	217
chr17	84692201	84692780	STAT5_hi_dDHS	Peak_30281	.	-1	-1	.	0
chr17	84697481	84697920	STAT5_hi_dDHS	Peak_30282	.	-1	-1	.	0
chr17	84719661	84720600	STAT5_hi_dDHS	Peak_30284	chr17	84719831	84720392	31062	561
chr17	84804961	84805540	STAT5_hi_dDHS	Peak_30289	chr17	84805046	84805357	31066	311
chr17	85131681	85132540	STAT5_hi_dDHS	Peak_30304	chr17	85131939	85132460	31080	521
chr17	85142481	85142860	STAT5_hi_dDHS	Peak_30306	chr17	85142636	85142850	31083	214
chr17	85493581	85493960	STAT5_hi_dDHS	Peak_30330	.	-1	-1	.	0
chr17	86697081	86697520	STAT5_hi_dDHS	Peak_30358	chr17	86697108	86697356	31147	248
chr17	86793621	86794160	STAT5_hi_dDHS	Peak_30364	chr17	86793734	86794060	31161	326
chr17	86896321	86896960	STAT5_hi_dDHS	Peak_30379	chr17	86896262	86896992	31178	639
chr18	3268961	3269800	STAT5_hi_dDHS	Peak_30540	chr18	3269038	3269307	31335	269
chr18	3423461	3424260	STAT5_hi_dDHS	Peak_30551	chr18	3423719	3424240	31344	521
chr18	4257881	4258540	STAT5_hi_dDHS	Peak_30564	chr18	4257980	4258518	31352	538
chr18	4266161	4266500	STAT5_hi_dDHS	Peak_30565	chr18	4266131	4266569	31353	339
chr18	4278181	4278820	STAT5_hi_dDHS	Peak_30566	chr18	4278387	4278776	31354	389
chr18	5784821	5785140	STAT5_hi_dDHS	Peak_30648	chr18	5785011	5785454	31443	129
chr18	7657641	7658240	STAT5_hi_dDHS	Peak_30689	chr18	7657862	7658161	31477	299
chr18	8322561	8323020	STAT5_hi_dDHS	Peak_30708	chr18	8322692	8322909	31490	217
chr18	8864141	8864360	STAT5_hi_dDHS	Peak_30720	chr18	8864011	8864402	31498	219
chr18	8939541	8940340	STAT5_hi_dDHS	Peak_30729	chr18	8939511	8940749	31504	799
chr18	10163501	10164020	STAT5_hi_dDHS	Peak_30766	.	-1	-1	.	0
chr18	10450981	10451680	STAT5_hi_dDHS	Peak_30775	chr18	10450853	10451154	31547	173
chr18	10735181	10735780	STAT5_hi_dDHS	Peak_30791	.	-1	-1	.	0
chr18	11144781	11145080	STAT5_hi_dDHS	Peak_30811	chr18	11144465	11145227	31581	299
chr18	11818361	11818760	STAT5_hi_dDHS	Peak_30831	chr18	11818587	11818757	31596	170
chr18	12006581	12007260	STAT5_hi_dDHS	Peak_30836	chr18	12006791	12007314	31602	469
chr18	12415541	12415860	STAT5_hi_dDHS	Peak_30869	.	-1	-1	.	0
chr18	12714441	12714800	STAT5_hi_dDHS	Peak_30879	chr18	12714615	12714715	31649	100
chr18	13019921	13020600	STAT5_hi_dDHS	Peak_30916	.	-1	-1	.	0
chr18	13384041	13384480	STAT5_hi_dDHS	Peak_30938	chr18	13383913	13384371	31765	330
chr18	15570601	15570940	STAT5_hi_dDHS	Peak_30971	chr18	15570793	15570997	31787	147
chr18	16816921	16817380	STAT5_hi_dDHS	Peak_30987	chr18	16816915	16817234	31797	313
chr18	16821381	16822180	STAT5_hi_dDHS	Peak_30988	chr18	16821691	16821972	31799	281
chr18	20711301	20711820	STAT5_hi_dDHS	Peak_31036	chr18	20711237	20712042	31845	519
chr18	21129321	21129920	STAT5_hi_dDHS	Peak_31078	chr18	21129585	21129984	31892	335
chr18	21385881	21386500	STAT5_hi_dDHS	Peak_31096	chr18	21385997	21386197	31904	200
chr18	21533681	21534160	STAT5_hi_dDHS	Peak_31106	chr18	21533748	21534117	31908	369
chr18	24710101	24710460	STAT5_hi_dDHS	Peak_31143	.	-1	-1	.	0
chr18	29934081	29934880	STAT5_hi_dDHS	Peak_31169	chr18	29934143	29934796	31968	653
chr18	33352141	33352740	STAT5_hi_dDHS	Peak_31251	chr18	33352489	33352640	32066	151
chr18	33494941	33495660	STAT5_hi_dDHS	Peak_31258	chr18	33495193	33495604	32074	411
chr18	33496441	33497600	STAT5_hi_dDHS	Peak_31259	chr18	33496355	33497525	32075	1084
chr18	33511261	33511940	STAT5_hi_dDHS	Peak_31260	chr18	33511347	33511764	32076	417
chr18	33593401	33594240	STAT5_hi_dDHS	Peak_31264	chr18	33593079	33594009	32080	608
chr18	33595581	33596080	STAT5_hi_dDHS	Peak_31265	chr18	33595550	33596451	32081	499
chr18	33654361	33654820	STAT5_hi_dDHS	Peak_31269	chr18	33654339	33654938	32087	459
chr18	33722041	33722700	STAT5_hi_dDHS	Peak_31272	chr18	33721932	33722576	32089	535
chr18	33939581	33940320	STAT5_hi_dDHS	Peak_31273	chr18	33939702	33940198	32091	496
chr18	34938441	34939260	STAT5_hi_dDHS	Peak_31307	chr18	34938454	34939197	32130	743
chr18	35024561	35025560	STAT5_hi_dDHS	Peak_31312	chr18	35024673	35026384	32136	887
chr18	35675061	35675420	STAT5_hi_dDHS	Peak_31344	.	-1	-1	.	0
chr18	36815841	36816760	STAT5_hi_dDHS	Peak_31405	chr18	36816338	36816564	32232	226
chr18	36825281	36826060	STAT5_hi_dDHS	Peak_31408	chr18	36825324	36825953	32235	629
chr18	38087421	38087900	STAT5_hi_dDHS	Peak_31441	.	-1	-1	.	0
chr18	38522161	38522540	STAT5_hi_dDHS	Peak_31484	.	-1	-1	.	0
chr18	38587521	38587940	STAT5_hi_dDHS	Peak_31495	chr18	38587773	38587987	32348	167
chr18	39145621	39146260	STAT5_hi_dDHS	Peak_31551	.	-1	-1	.	0
chr18	39177681	39177980	STAT5_hi_dDHS	Peak_31554	chr18	39177432	39177844	32399	163
chr18	39525821	39526540	STAT5_hi_dDHS	Peak_31579	chr18	39525855	39526448	32425	593
chr18	39698701	39699100	STAT5_hi_dDHS	Peak_31595	.	-1	-1	.	0
chr18	39815801	39816860	STAT5_hi_dDHS	Peak_31605	chr18	39816165	39816449	32455	284
chr18	39987601	39988620	STAT5_hi_dDHS	Peak_31616	chr18	39987194	39988368	32461	767
chr18	40015381	40015960	STAT5_hi_dDHS	Peak_31617	chr18	40015516	40015811	32462	295
chr18	42878481	42879280	STAT5_hi_dDHS	Peak_31645	chr18	42878620	42879131	32482	511
chr18	42950061	42950680	STAT5_hi_dDHS	Peak_31652	chr18	42950174	42950574	32485	400
chr18	43226121	43226660	STAT5_hi_dDHS	Peak_31661	.	-1	-1	.	0
chr18	43291521	43291800	STAT5_hi_dDHS	Peak_31664	chr18	43291588	43291794	32492	206
chr18	43409881	43410260	STAT5_hi_dDHS	Peak_31668	chr18	43410006	43410682	32496	254
chr18	44140341	44141020	STAT5_hi_dDHS	Peak_31684	chr18	44140621	44141380	32509	399
chr18	45589041	45589600	STAT5_hi_dDHS	Peak_31709	.	-1	-1	.	0
chr18	45641601	45642180	STAT5_hi_dDHS	Peak_31712	chr18	45641755	45641957	32533	202
chr18	45736521	45737060	STAT5_hi_dDHS	Peak_31717	.	-1	-1	.	0
chr18	46614761	46615400	STAT5_hi_dDHS	Peak_31737	chr18	46614618	46615337	32553	576
chr18	46795961	46796600	STAT5_hi_dDHS	Peak_31759	chr18	46795922	46796721	32574	639
chr18	47473181	47473820	STAT5_hi_dDHS	Peak_31789	chr18	47473132	47473415	32601	234
chr18	51310081	51310640	STAT5_hi_dDHS	Peak_31820	chr18	51310356	51310749	32634	284
chr18	51327221	51327960	STAT5_hi_dDHS	Peak_31824	chr18	51327223	51327795	32639	572
chr18	54651561	54652200	STAT5_hi_dDHS	Peak_31904	chr18	54651672	54652269	32686	528
chr18	55006081	55006780	STAT5_hi_dDHS	Peak_31910	chr18	55006122	55006997	32693	658
chr18	56573821	56574560	STAT5_hi_dDHS	Peak_31975	chr18	56573819	56574422	32756	601
chr18	57133281	57133900	STAT5_hi_dDHS	Peak_32012	chr18	57133504	57134032	32795	396
chr18	59282801	59283080	STAT5_hi_dDHS	Peak_32049	chr18	59282742	59283076	32825	275
chr18	59376921	59378160	STAT5_hi_dDHS	Peak_32056	chr18	59377267	59377918	32835	651
chr18	60368721	60369160	STAT5_hi_dDHS	Peak_32062	chr18	60368834	60369083	32837	249
chr18	60376501	60376920	STAT5_hi_dDHS	Peak_32066	chr18	60376463	60376854	32842	353
chr18	60392881	60393300	STAT5_hi_dDHS	Peak_32069	chr18	60392831	60393138	32846	257
chr18	60539301	60539880	STAT5_hi_dDHS	Peak_32076	chr18	60539402	60539798	32853	396
chr18	60545241	60545640	STAT5_hi_dDHS	Peak_32080	chr18	60545366	60545511	32856	145
chr18	61999601	62000840	STAT5_hi_dDHS	Peak_32196	chr18	61999691	62001610	33004	1149
chr18	62066641	62067280	STAT5_hi_dDHS	Peak_32203	chr18	62066478	62067205	33011	564
chr18	64498161	64498780	STAT5_hi_dDHS	Peak_32267	chr18	64498229	64498918	33067	551
chr18	64692181	64693240	STAT5_hi_dDHS	Peak_32288	chr18	64691656	64693393	33094	1059
chr18	64766401	64766940	STAT5_hi_dDHS	Peak_32294	chr18	64766611	64767254	33099	329
chr18	65158821	65159560	STAT5_hi_dDHS	Peak_32327	chr18	65158965	65159481	33126	516
chr18	65213041	65214020	STAT5_hi_dDHS	Peak_32334	chr18	65212247	65213826	33135	785
chr18	65389821	65390280	STAT5_hi_dDHS	Peak_32351	chr18	65389916	65390309	33158	364
chr18	65556981	65557480	STAT5_hi_dDHS	Peak_32359	chr18	65557265	65557922	33173	215
chr18	66158841	66159520	STAT5_hi_dDHS	Peak_32386	chr18	66158911	66159416	33188	505
chr18	67905501	67906020	STAT5_hi_dDHS	Peak_32439	chr18	67905297	67905940	33240	439
chr18	68985841	68986180	STAT5_hi_dDHS	Peak_32486	chr18	68985833	68986000	33281	159
chr18	70689801	70690860	STAT5_hi_dDHS	Peak_32523	.	-1	-1	.	0
chr18	73946721	73947280	STAT5_hi_dDHS	Peak_32555	chr18	73946872	73947328	33337	408
chr18	74001401	74001940	STAT5_hi_dDHS	Peak_32561	chr18	74001636	74001989	33342	304
chr18	74806181	74806580	STAT5_hi_dDHS	Peak_32592	chr18	74806298	74806641	33371	282
chr18	75977181	75977920	STAT5_hi_dDHS	Peak_32680	chr18	75977275	75977860	33480	585
chr18	75981761	75982320	STAT5_hi_dDHS	Peak_32682	chr18	75981769	75982065	33484	296
chr18	76107221	76107620	STAT5_hi_dDHS	Peak_32686	chr18	76107198	76107498	33489	277
chr18	76130601	76131420	STAT5_hi_dDHS	Peak_32687	chr18	76130799	76131310	33491	511
chr18	76178281	76179000	STAT5_hi_dDHS	Peak_32691	chr18	76178218	76179230	33497	719
chr18	81438681	81438880	STAT5_hi_dDHS	Peak_32800	chr18	81438021	81439013	33617	199
chr18	81466381	81466900	STAT5_hi_dDHS	Peak_32802	chr18	81466425	81466933	33619	475
chr18	81515881	81516920	STAT5_hi_dDHS	Peak_32803	chr18	81516018	81516761	33620	743
chr18	81518261	81518900	STAT5_hi_dDHS	Peak_32804	chr18	81518424	81519031	33621	476
chr18	84855101	84855540	STAT5_hi_dDHS	Peak_32864	chr18	84853966	84855476	33687	375
chr18	90394661	90394940	STAT5_hi_dDHS	Peak_32897	chr18	90394468	90394824	33738	163
chr18	90395141	90395500	STAT5_hi_dDHS	Peak_32898	.	-1	-1	.	0
chr19	3334021	3334580	STAT5_hi_dDHS	Peak_32916	chr19	3333924	3334483	33757	462
chr19	3353321	3354200	STAT5_hi_dDHS	Peak_32918	chr19	3353482	3354146	33759	664
chr19	4477421	4478100	STAT5_hi_dDHS	Peak_33032	.	-1	-1	.	0
chr19	4508361	4509180	STAT5_hi_dDHS	Peak_33037	chr19	4508537	4508907	33897	370
chr19	4600261	4600760	STAT5_hi_dDHS	Peak_33053	chr19	4600191	4600447	33914	186
chr19	4837681	4838020	STAT5_hi_dDHS	Peak_33074	chr19	4837671	4837999	33936	318
chr19	5821781	5823620	STAT5_hi_dDHS	Peak_33145	chr19	5822024	5823747	34009	1596
chr19	5846381	5847520	STAT5_hi_dDHS	Peak_33153	.	-1	-1	.	0
chr19	6041201	6041880	STAT5_hi_dDHS	Peak_33182	chr19	6041545	6041753	34050	208
chr19	7839961	7840460	STAT5_hi_dDHS	Peak_33287	chr19	7840135	7840455	34177	320
chr19	7849561	7850260	STAT5_hi_dDHS	Peak_33288	chr19	7849855	7850210	34178	355
chr19	7863121	7863600	STAT5_hi_dDHS	Peak_33289	chr19	7863196	7863315	34179	119
chr19	7877001	7877720	STAT5_hi_dDHS	Peak_33291	chr19	7877105	7877393	34182	288
chr19	8548521	8549040	STAT5_hi_dDHS	Peak_33301	chr19	8548684	8548783	34193	99
chr19	9122201	9122660	STAT5_hi_dDHS	Peak_33355	chr19	9121550	9122791	34269	459
chr19	10024561	10024880	STAT5_hi_dDHS	Peak_33377	.	-1	-1	.	0
chr19	12141001	12141640	STAT5_hi_dDHS	Peak_33489	chr19	12141097	12141223	34421	126
chr19	12769681	12770600	STAT5_hi_dDHS	Peak_33519	chr19	12769983	12770480	34452	497
chr19	12793801	12794340	STAT5_hi_dDHS	Peak_33520	.	-1	-1	.	0
chr19	12858241	12858880	STAT5_hi_dDHS	Peak_33525	.	-1	-1	.	0
chr19	12880261	12880700	STAT5_hi_dDHS	Peak_33529	chr19	12880328	12880541	34460	213
chr19	14590741	14591420	STAT5_hi_dDHS	Peak_33536	.	-1	-1	.	0
chr19	14798981	14799720	STAT5_hi_dDHS	Peak_33543	chr19	14798937	14799581	34471	600
chr19	14816801	14817400	STAT5_hi_dDHS	Peak_33545	chr19	14816804	14817275	34474	471
chr19	17484921	17485660	STAT5_hi_dDHS	Peak_33592	chr19	17485044	17485615	34518	571
chr19	17819201	17819580	STAT5_hi_dDHS	Peak_33604	chr19	17819139	17819464	34527	263
chr19	17837061	17837260	STAT5_hi_dDHS	Peak_33607	chr19	17836954	17837918	34530	199
chr19	18161941	18162480	STAT5_hi_dDHS	Peak_33620	.	-1	-1	.	0
chr19	18203081	18203900	STAT5_hi_dDHS	Peak_33622	chr19	18203223	18203630	34545	407
chr19	18220581	18221700	STAT5_hi_dDHS	Peak_33623	chr19	18220696	18221456	34546	760
chr19	18707041	18707780	STAT5_hi_dDHS	Peak_33633	.	-1	-1	.	0
chr19	20797321	20798000	STAT5_hi_dDHS	Peak_33677	chr19	20797440	20797732	34597	292
chr19	20800001	20800640	STAT5_hi_dDHS	Peak_33678	chr19	20799994	20800612	34598	611
chr19	20831681	20831980	STAT5_hi_dDHS	Peak_33681	.	-1	-1	.	0
chr19	21260621	21261000	STAT5_hi_dDHS	Peak_33703	.	-1	-1	.	0
chr19	21551221	21551600	STAT5_hi_dDHS	Peak_33715	chr19	21551319	21551614	34624	281
chr19	21698801	21699580	STAT5_hi_dDHS	Peak_33727	chr19	21698705	21699490	34630	689
chr19	21707161	21707840	STAT5_hi_dDHS	Peak_33729	chr19	21707333	21707699	34633	366
chr19	21725981	21726820	STAT5_hi_dDHS	Peak_33731	.	-1	-1	.	0
chr19	21738061	21738820	STAT5_hi_dDHS	Peak_33732	.	-1	-1	.	0
chr19	25696261	25696680	STAT5_hi_dDHS	Peak_33888	chr19	25696428	25696827	34775	252
chr19	26852461	26853240	STAT5_hi_dDHS	Peak_33916	chr19	26852557	26853131	34809	574
chr19	26897821	26898700	STAT5_hi_dDHS	Peak_33917	chr19	26898263	26898493	34810	230
chr19	26945881	26946400	STAT5_hi_dDHS	Peak_33921	.	-1	-1	.	0
chr19	27566801	27567140	STAT5_hi_dDHS	Peak_33943	chr19	27566969	27567249	34834	171
chr19	27747261	27747580	STAT5_hi_dDHS	Peak_33951	.	-1	-1	.	0
chr19	28731221	28731700	STAT5_hi_dDHS	Peak_33959	chr19	28731366	28731727	34843	334
chr19	29120481	29121180	STAT5_hi_dDHS	Peak_33975	chr19	29120519	29121143	34863	624
chr19	29194701	29195280	STAT5_hi_dDHS	Peak_33986	chr19	29194834	29195132	34876	298
chr19	29953381	29954060	STAT5_hi_dDHS	Peak_34037	chr19	29953455	29954056	34928	601
chr19	30185621	30186020	STAT5_hi_dDHS	Peak_34055	chr19	30185802	30186321	34947	218
chr19	32263521	32263880	STAT5_hi_dDHS	Peak_34123	chr19	32263614	32263888	35021	266
chr19	32276481	32277100	STAT5_hi_dDHS	Peak_34127	chr19	32276605	32276919	35023	314
chr19	32289441	32290300	STAT5_hi_dDHS	Peak_34130	chr19	32289565	32290068	35025	503
chr19	32621901	32622320	STAT5_hi_dDHS	Peak_34166	chr19	32621949	32622171	35062	222
chr19	33066841	33067460	STAT5_hi_dDHS	Peak_34208	chr19	33066788	33067306	35098	465
chr19	34364901	34365160	STAT5_hi_dDHS	Peak_34235	chr19	34364614	34365983	35118	259
chr19	34365261	34366000	STAT5_hi_dDHS	Peak_34236	chr19	34364614	34365983	35118	722
chr19	34387221	34387660	STAT5_hi_dDHS	Peak_34238	chr19	34386921	34387232	35120	11
chr19	34387721	34388120	STAT5_hi_dDHS	Peak_34239	chr19	34387683	34388013	35121	292
chr19	34935861	34936280	STAT5_hi_dDHS	Peak_34291	.	-1	-1	.	0
chr19	36338961	36339480	STAT5_hi_dDHS	Peak_34312	chr19	36339035	36339347	35199	312
chr19	36855541	36856260	STAT5_hi_dDHS	Peak_34353	.	-1	-1	.	0
chr19	37529621	37530900	STAT5_hi_dDHS	Peak_34392	chr19	37530033	37530916	35279	867
chr19	37575921	37576540	STAT5_hi_dDHS	Peak_34396	chr19	37576091	37576369	35285	278
chr19	37582541	37582960	STAT5_hi_dDHS	Peak_34397	chr19	37582642	37582857	35287	215
chr19	39740281	39740600	STAT5_hi_dDHS	Peak_34509	.	-1	-1	.	0
chr19	39762261	39762640	STAT5_hi_dDHS	Peak_34511	.	-1	-1	.	0
chr19	39815561	39815820	STAT5_hi_dDHS	Peak_34513	chr19	39815355	39815767	35388	206
chr19	39998161	39998420	STAT5_hi_dDHS	Peak_34514	.	-1	-1	.	0
chr19	40261481	40262120	STAT5_hi_dDHS	Peak_34525	chr19	40261640	40262114	35409	474
chr19	40266421	40266900	STAT5_hi_dDHS	Peak_34527	chr19	40266554	40266799	35411	245
chr19	40293041	40293780	STAT5_hi_dDHS	Peak_34528	chr19	40293067	40293440	35412	373
chr19	40295221	40295960	STAT5_hi_dDHS	Peak_34529	chr19	40295184	40295902	35414	681
chr19	40296521	40297700	STAT5_hi_dDHS	Peak_34530	chr19	40296737	40297622	35416	885
chr19	40305721	40306720	STAT5_hi_dDHS	Peak_34533	chr19	40305545	40306957	35421	999
chr19	41569881	41570480	STAT5_hi_dDHS	Peak_34627	chr19	41570040	41570246	35534	206
chr19	44046541	44047320	STAT5_hi_dDHS	Peak_34749	chr19	44046586	44047196	35688	610
chr19	44130581	44131220	STAT5_hi_dDHS	Peak_34761	.	-1	-1	.	0
chr19	46780841	46781100	STAT5_hi_dDHS	Peak_34937	.	-1	-1	.	0
chr19	47411921	47412640	STAT5_hi_dDHS	Peak_34980	chr19	47411937	47412691	35938	703
chr19	54085301	54086000	STAT5_hi_dDHS	Peak_35128	chr19	54085245	54085847	36079	546
chr19	55468461	55469120	STAT5_hi_dDHS	Peak_35181	chr19	55468614	55468939	36150	325
chr19	57332161	57333000	STAT5_hi_dDHS	Peak_35285	chr19	57332239	57332783	36274	544
chr19	59145661	59146700	STAT5_hi_dDHS	Peak_35362	chr19	59145604	59146667	36364	1006
chr2	3332901	3333460	STAT5_hi_dDHS	Peak_35436	.	-1	-1	.	0
chr2	4816161	4817200	STAT5_hi_dDHS	Peak_35494	chr2	4816186	4817119	36492	933
chr2	4922381	4923180	STAT5_hi_dDHS	Peak_35509	chr2	4921894	4923189	36510	799
chr2	4956081	4957040	STAT5_hi_dDHS	Peak_35511	chr2	4956111	4956888	36513	777
chr2	5207381	5207800	STAT5_hi_dDHS	Peak_35521	.	-1	-1	.	0
chr2	5521481	5521740	STAT5_hi_dDHS	Peak_35531	chr2	5521347	5521567	36531	86
chr2	6114601	6115380	STAT5_hi_dDHS	Peak_35564	.	-1	-1	.	0
chr2	6242781	6243220	STAT5_hi_dDHS	Peak_35571	chr2	6242584	6244481	36584	439
chr2	6252501	6252980	STAT5_hi_dDHS	Peak_35572	chr2	6252683	6252984	36585	297
chr2	6254701	6255720	STAT5_hi_dDHS	Peak_35573	chr2	6254807	6255472	36586	665
chr2	7081141	7081400	STAT5_hi_dDHS	Peak_35592	chr2	7081195	7081531	36601	205
chr2	8045621	8046340	STAT5_hi_dDHS	Peak_35601	chr2	8045872	8046169	36607	297
chr2	9894421	9895000	STAT5_hi_dDHS	Peak_35616	chr2	9894367	9894984	36614	563
chr2	10043441	10043900	STAT5_hi_dDHS	Peak_35626	.	-1	-1	.	0
chr2	10052781	10053520	STAT5_hi_dDHS	Peak_35631	chr2	10052925	10053617	36637	595
chr2	10055481	10056440	STAT5_hi_dDHS	Peak_35632	chr2	10055553	10056115	36638	562
chr2	11285321	11286200	STAT5_hi_dDHS	Peak_35658	chr2	11284277	11285467	36656	146
chr2	11286921	11287460	STAT5_hi_dDHS	Peak_35659	.	-1	-1	.	0
chr2	11347441	11347820	STAT5_hi_dDHS	Peak_35665	chr2	11347399	11347797	36661	356
chr2	11351221	11351700	STAT5_hi_dDHS	Peak_35668	chr2	11351180	11351561	36664	340
chr2	11368881	11369700	STAT5_hi_dDHS	Peak_35672	chr2	11368907	11369753	36667	793
chr2	11379501	11379940	STAT5_hi_dDHS	Peak_35674	chr2	11379556	11379904	36669	348
chr2	11639061	11639360	STAT5_hi_dDHS	Peak_35698	.	-1	-1	.	0
chr2	11640101	11640640	STAT5_hi_dDHS	Peak_35699	chr2	11639864	11640564	36696	463
chr2	12820761	12821100	STAT5_hi_dDHS	Peak_35731	chr2	12820775	12821198	36720	325
chr2	18024721	18025300	STAT5_hi_dDHS	Peak_35817	chr2	18024941	18025126	36780	185
chr2	18984281	18984720	STAT5_hi_dDHS	Peak_35852	chr2	18984395	18984642	36818	247
chr2	18986201	18986880	STAT5_hi_dDHS	Peak_35853	chr2	18986490	18986945	36819	390
chr2	19568521	19568880	STAT5_hi_dDHS	Peak_35864	.	-1	-1	.	0
chr2	21044081	21044500	STAT5_hi_dDHS	Peak_35904	chr2	21044117	21044377	36857	260
chr2	23896021	23896620	STAT5_hi_dDHS	Peak_35938	.	-1	-1	.	0
chr2	24042801	24043520	STAT5_hi_dDHS	Peak_35942	chr2	24043034	24044072	36889	486
chr2	27410801	27411620	STAT5_hi_dDHS	Peak_36150	chr2	27410719	27411384	37146	583
chr2	28473841	28474560	STAT5_hi_dDHS	Peak_36198	chr2	28473920	28474401	37224	481
chr2	29999941	30000560	STAT5_hi_dDHS	Peak_36268	chr2	29999884	30000422	37308	481
chr2	30748721	30749120	STAT5_hi_dDHS	Peak_36341	chr2	30748771	30749773	37388	349
chr2	31477521	31477940	STAT5_hi_dDHS	Peak_36388	.	-1	-1	.	0
chr2	32243161	32243380	STAT5_hi_dDHS	Peak_36436	chr2	32243097	32243641	37513	219
chr2	32264601	32265340	STAT5_hi_dDHS	Peak_36440	chr2	32263914	32265135	37518	534
chr2	32304061	32304260	STAT5_hi_dDHS	Peak_36448	.	-1	-1	.	0
chr2	34625481	34626120	STAT5_hi_dDHS	Peak_36559	.	-1	-1	.	0
chr2	34918761	34919020	STAT5_hi_dDHS	Peak_36581	chr2	34918864	34919853	37688	156
chr2	34929321	34929660	STAT5_hi_dDHS	Peak_36584	chr2	34929513	34930054	37692	147
chr2	34956661	34957220	STAT5_hi_dDHS	Peak_36588	chr2	34955813	34956864	37694	203
chr2	35364681	35365200	STAT5_hi_dDHS	Peak_36614	chr2	35364817	35365074	37721	257
chr2	37564221	37564860	STAT5_hi_dDHS	Peak_36685	chr2	37564343	37564862	37795	517
chr2	38147101	38147460	STAT5_hi_dDHS	Peak_36707	chr2	38147105	38147356	37808	251
chr2	38374481	38374880	STAT5_hi_dDHS	Peak_36720	chr2	38374277	38374868	37820	387
chr2	38389461	38390600	STAT5_hi_dDHS	Peak_36725	chr2	38389896	38390489	37825	593
chr2	41877821	41878540	STAT5_hi_dDHS	Peak_36776	chr2	41877972	41878457	37867	485
chr2	41894481	41895260	STAT5_hi_dDHS	Peak_36777	chr2	41894731	41895307	37868	529
chr2	43078361	43078740	STAT5_hi_dDHS	Peak_36782	chr2	43078239	43078656	37869	295
chr2	43364701	43365220	STAT5_hi_dDHS	Peak_36787	chr2	43365015	43365241	37872	205
chr2	43365521	43366160	STAT5_hi_dDHS	Peak_36788	.	-1	-1	.	0
chr2	43998141	43998380	STAT5_hi_dDHS	Peak_36804	chr2	43998187	43998474	37883	193
chr2	44775821	44776440	STAT5_hi_dDHS	Peak_36810	chr2	44776105	44776529	37885	335
chr2	48259601	48260080	STAT5_hi_dDHS	Peak_36855	chr2	48259660	48260351	37911	420
chr2	48325361	48325780	STAT5_hi_dDHS	Peak_36858	.	-1	-1	.	0
chr2	50187261	50187780	STAT5_hi_dDHS	Peak_36901	chr2	50187347	50187743	37946	396
chr2	50819861	50820180	STAT5_hi_dDHS	Peak_36924	.	-1	-1	.	0
chr2	50823961	50824420	STAT5_hi_dDHS	Peak_36926	chr2	50823941	50824203	37964	242
chr2	50838041	50838520	STAT5_hi_dDHS	Peak_36927	chr2	50837976	50838414	37965	373
chr2	50839301	50840020	STAT5_hi_dDHS	Peak_36928	chr2	50839404	50839829	37966	425
chr2	50997981	50998680	STAT5_hi_dDHS	Peak_36934	chr2	50997896	50998866	37975	699
chr2	52174601	52175160	STAT5_hi_dDHS	Peak_36955	chr2	52174614	52175205	37991	546
chr2	52228021	52228540	STAT5_hi_dDHS	Peak_36957	chr2	52227804	52228506	37994	485
chr2	52275541	52276240	STAT5_hi_dDHS	Peak_36962	chr2	52275758	52276193	37999	435
chr2	52431041	52432500	STAT5_hi_dDHS	Peak_36972	chr2	52431203	52432507	38008	1297
chr2	52753961	52754460	STAT5_hi_dDHS	Peak_36993	chr2	52754057	52754325	38023	268
chr2	52922241	52922660	STAT5_hi_dDHS	Peak_37002	.	-1	-1	.	0
chr2	56465641	56466280	STAT5_hi_dDHS	Peak_37027	.	-1	-1	.	0
chr2	58415081	58415620	STAT5_hi_dDHS	Peak_37057	chr2	58414501	58415639	38064	539
chr2	58417681	58418260	STAT5_hi_dDHS	Peak_37058	chr2	58417425	58418111	38066	430
chr2	60107661	60108500	STAT5_hi_dDHS	Peak_37126	chr2	60107552	60108460	38138	799
chr2	60122141	60122940	STAT5_hi_dDHS	Peak_37130	.	-1	-1	.	0
chr2	63348461	63349200	STAT5_hi_dDHS	Peak_37212	chr2	63348600	63349104	38207	504
chr2	63377361	63377880	STAT5_hi_dDHS	Peak_37215	.	-1	-1	.	0
chr2	63383461	63384000	STAT5_hi_dDHS	Peak_37216	chr2	63383514	63383878	38208	364
chr2	64958881	64959320	STAT5_hi_dDHS	Peak_37260	chr2	64959033	64959482	38241	287
chr2	67561421	67562040	STAT5_hi_dDHS	Peak_37307	chr2	67561515	67561980	38274	465
chr2	67650921	67651320	STAT5_hi_dDHS	Peak_37309	.	-1	-1	.	0
chr2	67719641	67720500	STAT5_hi_dDHS	Peak_37312	chr2	67719687	67720323	38279	636
chr2	67721421	67722500	STAT5_hi_dDHS	Peak_37313	chr2	67721065	67722234	38280	813
chr2	67725621	67725880	STAT5_hi_dDHS	Peak_37314	.	-1	-1	.	0
chr2	67795381	67796080	STAT5_hi_dDHS	Peak_37318	chr2	67795488	67796024	38283	536
chr2	67806621	67807700	STAT5_hi_dDHS	Peak_37319	chr2	67806814	67807386	38285	572
chr2	67815441	67816140	STAT5_hi_dDHS	Peak_37322	chr2	67815621	67816078	38289	457
chr2	67817221	67818140	STAT5_hi_dDHS	Peak_37323	chr2	67817658	67817946	38290	288
chr2	67831221	67832000	STAT5_hi_dDHS	Peak_37326	chr2	67831559	67831811	38293	252
chr2	68633921	68634540	STAT5_hi_dDHS	Peak_37341	chr2	68633886	68634813	38304	619
chr2	68682621	68682860	STAT5_hi_dDHS	Peak_37344	chr2	68682526	68683910	38307	239
chr2	68727981	68728860	STAT5_hi_dDHS	Peak_37350	.	-1	-1	.	0
chr2	68770661	68771080	STAT5_hi_dDHS	Peak_37355	chr2	68770807	68771031	38313	224
chr2	68773641	68774140	STAT5_hi_dDHS	Peak_37356	chr2	68773749	68774198	38314	391
chr2	68857041	68857660	STAT5_hi_dDHS	Peak_37361	chr2	68857103	68857478	38317	375
chr2	71577521	71578120	STAT5_hi_dDHS	Peak_37466	chr2	71577344	71577944	38416	423
chr2	71994141	71995020	STAT5_hi_dDHS	Peak_37478	chr2	71994265	71994967	38435	702
chr2	72579701	72580320	STAT5_hi_dDHS	Peak_37500	chr2	72579733	72580300	38473	567
chr2	72590521	72591360	STAT5_hi_dDHS	Peak_37502	chr2	72590610	72591184	38476	574
chr2	73446921	73447660	STAT5_hi_dDHS	Peak_37549	chr2	73447082	73447592	38517	510
chr2	73809261	73809860	STAT5_hi_dDHS	Peak_37563	chr2	73809149	73809687	38527	426
chr2	73821261	73821900	STAT5_hi_dDHS	Peak_37564	.	-1	-1	.	0
chr2	77887441	77887760	STAT5_hi_dDHS	Peak_37698	chr2	77887385	77887703	38618	262
chr2	77897901	77898440	STAT5_hi_dDHS	Peak_37699	.	-1	-1	.	0
chr2	79218341	79219200	STAT5_hi_dDHS	Peak_37717	chr2	79218488	79219015	38630	527
chr2	79219321	79220060	STAT5_hi_dDHS	Peak_37718	chr2	79219429	79219821	38631	392
chr2	79562281	79562760	STAT5_hi_dDHS	Peak_37729	.	-1	-1	.	0
chr2	79865181	79865680	STAT5_hi_dDHS	Peak_37746	chr2	79865204	79865373	38648	169
chr2	84218701	84219300	STAT5_hi_dDHS	Peak_37814	chr2	84218909	84219173	38684	264
chr2	84566021	84566540	STAT5_hi_dDHS	Peak_37837	chr2	84565932	84566391	38702	370
chr2	84733401	84733840	STAT5_hi_dDHS	Peak_37863	chr2	84733513	84733754	38735	241
chr2	84735541	84736120	STAT5_hi_dDHS	Peak_37864	chr2	84735639	84735955	38736	316
chr2	84836221	84837020	STAT5_hi_dDHS	Peak_37872	chr2	84836528	84837295	38742	492
chr2	90400241	90400960	STAT5_hi_dDHS	Peak_37912	chr2	90400356	90400911	38785	555
chr2	90805681	90806040	STAT5_hi_dDHS	Peak_37933	.	-1	-1	.	0
chr2	90806541	90807200	STAT5_hi_dDHS	Peak_37934	chr2	90806784	90806991	38809	207
chr2	91000701	91001680	STAT5_hi_dDHS	Peak_37952	chr2	91000831	91001538	38826	707
chr2	91473421	91474220	STAT5_hi_dDHS	Peak_37979	chr2	91472913	91474156	38860	735
chr2	92286081	92286560	STAT5_hi_dDHS	Peak_38039	chr2	92286048	92287213	38935	479
chr2	92291101	92291420	STAT5_hi_dDHS	Peak_38040	.	-1	-1	.	0
chr2	93884561	93885540	STAT5_hi_dDHS	Peak_38099	chr2	93884369	93884710	39013	149
chr2	93989701	93990300	STAT5_hi_dDHS	Peak_38112	.	-1	-1	.	0
chr2	93994201	93995100	STAT5_hi_dDHS	Peak_38113	chr2	93994242	93994948	39016	706
chr2	102222401	102222880	STAT5_hi_dDHS	Peak_38173	chr2	102222786	102222988	39071	94
chr2	102894321	102894940	STAT5_hi_dDHS	Peak_38192	chr2	102894366	102894831	39085	465
chr2	102910601	102911180	STAT5_hi_dDHS	Peak_38194	.	-1	-1	.	0
chr2	103048501	103048900	STAT5_hi_dDHS	Peak_38201	chr2	103048566	103048955	39092	334
chr2	103409681	103410440	STAT5_hi_dDHS	Peak_38226	chr2	103409848	103410210	39137	362
chr2	103423381	103423940	STAT5_hi_dDHS	Peak_38228	chr2	103423501	103423828	39139	327
chr2	106493401	106493940	STAT5_hi_dDHS	Peak_38350	chr2	106492942	106493891	39257	490
chr2	108604721	108605580	STAT5_hi_dDHS	Peak_38364	chr2	108604835	108605436	39262	601
chr2	109799201	109800140	STAT5_hi_dDHS	Peak_38394	chr2	109799208	109799603	39289	395
chr2	112433721	112434020	STAT5_hi_dDHS	Peak_38432	chr2	112433636	112434099	39321	299
chr2	112435321	112435840	STAT5_hi_dDHS	Peak_38433	chr2	112435465	112435704	39322	239
chr2	114599981	114601220	STAT5_hi_dDHS	Peak_38476	.	-1	-1	.	0
chr2	114601821	114602040	STAT5_hi_dDHS	Peak_38477	.	-1	-1	.	0
chr2	114613861	114614420	STAT5_hi_dDHS	Peak_38479	chr2	114614059	114614358	39352	299
chr2	116844941	116845360	STAT5_hi_dDHS	Peak_38529	chr2	116844871	116845230	39392	289
chr2	116852561	116853320	STAT5_hi_dDHS	Peak_38530	chr2	116852782	116853164	39393	382
chr2	116948461	116949060	STAT5_hi_dDHS	Peak_38533	chr2	116948724	116949061	39398	336
chr2	118131761	118132440	STAT5_hi_dDHS	Peak_38553	chr2	118131748	118132584	39413	679
chr2	119374081	119374860	STAT5_hi_dDHS	Peak_38632	chr2	119374381	119374735	39505	354
chr2	122031741	122032260	STAT5_hi_dDHS	Peak_38727	.	-1	-1	.	0
chr2	124937801	124938260	STAT5_hi_dDHS	Peak_38786	.	-1	-1	.	0
chr2	126473681	126473980	STAT5_hi_dDHS	Peak_38842	chr2	126473493	126473811	39712	130
chr2	126741881	126742540	STAT5_hi_dDHS	Peak_38858	chr2	126742041	126742306	39730	265
chr2	126757401	126757980	STAT5_hi_dDHS	Peak_38860	chr2	126757549	126757901	39732	352
chr2	128012621	128013480	STAT5_hi_dDHS	Peak_38912	chr2	128012947	128013448	39790	501
chr2	129068361	129068720	STAT5_hi_dDHS	Peak_38959	chr2	129068057	129068521	39838	160
chr2	130644881	130645220	STAT5_hi_dDHS	Peak_39006	chr2	130645042	130645333	39888	178
chr2	130754621	130755060	STAT5_hi_dDHS	Peak_39019	chr2	130754771	130755019	39901	248
chr2	131156081	131156800	STAT5_hi_dDHS	Peak_39047	chr2	131156243	131156603	39938	360
chr2	131283201	131283860	STAT5_hi_dDHS	Peak_39055	chr2	131283524	131283820	39946	296
chr2	132421061	132422040	STAT5_hi_dDHS	Peak_39106	chr2	132421001	132422365	39995	979
chr2	133321781	133322280	STAT5_hi_dDHS	Peak_39147	chr2	133321109	133321962	40031	181
chr2	133342121	133342760	STAT5_hi_dDHS	Peak_39150	chr2	133342243	133342770	40035	517
chr2	134346141	134346740	STAT5_hi_dDHS	Peak_39165	chr2	134346477	134346755	40046	263
chr2	134367521	134368240	STAT5_hi_dDHS	Peak_39166	chr2	134367624	134368221	40049	597
chr2	134369941	134371620	STAT5_hi_dDHS	Peak_39167	chr2	134369921	134371080	40050	1139
chr2	134480341	134481080	STAT5_hi_dDHS	Peak_39173	chr2	134480471	134480978	40060	507
chr2	134484521	134484940	STAT5_hi_dDHS	Peak_39174	chr2	134484548	134485335	40061	392
chr2	134484961	134485220	STAT5_hi_dDHS	Peak_39175	chr2	134484548	134485335	40061	259
chr2	134538961	134539380	STAT5_hi_dDHS	Peak_39180	chr2	134539121	134539343	40062	222
chr2	134549661	134550620	STAT5_hi_dDHS	Peak_39182	chr2	134549709	134550271	40063	562
chr2	134581641	134582300	STAT5_hi_dDHS	Peak_39183	chr2	134581899	134582107	40064	208
chr2	134658081	134658460	STAT5_hi_dDHS	Peak_39189	chr2	134657895	134658342	40069	261
chr2	134690541	134690980	STAT5_hi_dDHS	Peak_39192	chr2	134690582	134691176	40071	398
chr2	136832361	136832840	STAT5_hi_dDHS	Peak_39243	chr2	136832151	136832594	40108	233
chr2	136981721	136982240	STAT5_hi_dDHS	Peak_39249	chr2	136981909	136982043	40111	134
chr2	139745541	139746140	STAT5_hi_dDHS	Peak_39265	.	-1	-1	.	0
chr2	141111361	141112140	STAT5_hi_dDHS	Peak_39280	chr2	141111743	141112363	40135	397
chr2	141823321	141823900	STAT5_hi_dDHS	Peak_39285	chr2	141823522	141823839	40139	317
chr2	143701721	143702240	STAT5_hi_dDHS	Peak_39310	chr2	143701910	143702201	40157	291
chr2	143702381	143702740	STAT5_hi_dDHS	Peak_39311	chr2	143702371	143702718	40158	337
chr2	143987181	143987800	STAT5_hi_dDHS	Peak_39333	chr2	143986813	143987730	40177	549
chr2	144008981	144009720	STAT5_hi_dDHS	Peak_39339	chr2	144008966	144009673	40186	692
chr2	144023881	144024780	STAT5_hi_dDHS	Peak_39341	chr2	144023982	144024723	40188	741
chr2	144082501	144083000	STAT5_hi_dDHS	Peak_39348	chr2	144082613	144082879	40194	266
chr2	147353341	147354020	STAT5_hi_dDHS	Peak_39448	.	-1	-1	.	0
chr2	147358461	147359100	STAT5_hi_dDHS	Peak_39450	.	-1	-1	.	0
chr2	147368261	147368740	STAT5_hi_dDHS	Peak_39451	.	-1	-1	.	0
chr2	147386321	147386940	STAT5_hi_dDHS	Peak_39452	chr2	147386539	147386865	40279	326
chr2	147752421	147752740	STAT5_hi_dDHS	Peak_39464	chr2	147752720	147752976	40286	20
chr2	147757421	147758120	STAT5_hi_dDHS	Peak_39466	chr2	147757328	147758124	40288	699
chr2	147769781	147770860	STAT5_hi_dDHS	Peak_39468	chr2	147769769	147771000	40290	1079
chr2	147789421	147789820	STAT5_hi_dDHS	Peak_39471	chr2	147789592	147789838	40293	228
chr2	147814301	147814700	STAT5_hi_dDHS	Peak_39476	chr2	147814424	147814599	40299	175
chr2	147839181	147839580	STAT5_hi_dDHS	Peak_39478	chr2	147839244	147839497	40307	253
chr2	152372921	152373440	STAT5_hi_dDHS	Peak_39585	.	-1	-1	.	0
chr2	152373841	152374360	STAT5_hi_dDHS	Peak_39586	chr2	152373949	152374157	40414	208
chr2	152631681	152632220	STAT5_hi_dDHS	Peak_39614	chr2	152631805	152632301	40449	415
chr2	153418121	153419080	STAT5_hi_dDHS	Peak_39654	chr2	153417941	153419322	40495	959
chr2	153423001	153423840	STAT5_hi_dDHS	Peak_39655	chr2	153422881	153423760	40497	759
chr2	154169601	154170060	STAT5_hi_dDHS	Peak_39673	.	-1	-1	.	0
chr2	154435061	154435440	STAT5_hi_dDHS	Peak_39692	chr2	154434754	154435374	40545	313
chr2	154620321	154621020	STAT5_hi_dDHS	Peak_39704	.	-1	-1	.	0
chr2	154878301	154878960	STAT5_hi_dDHS	Peak_39715	chr2	154878247	154879181	40563	659
chr2	154910381	154910860	STAT5_hi_dDHS	Peak_39722	chr2	154910237	154910696	40575	315
chr2	155298301	155298660	STAT5_hi_dDHS	Peak_39748	chr2	155298286	155298831	40600	359
chr2	156049181	156050020	STAT5_hi_dDHS	Peak_39797	chr2	156049501	156049949	40654	448
chr2	157865141	157865600	STAT5_hi_dDHS	Peak_39869	chr2	157865472	157865720	40726	128
chr2	157888261	157889400	STAT5_hi_dDHS	Peak_39871	chr2	157888422	157889145	40730	723
chr2	160673401	160673860	STAT5_hi_dDHS	Peak_39984	chr2	160673439	160673734	40844	295
chr2	161191641	161192060	STAT5_hi_dDHS	Peak_40004	chr2	161191668	161191973	40860	305
chr2	163319741	163320120	STAT5_hi_dDHS	Peak_40057	chr2	163319846	163320027	40910	181
chr2	163421561	163422840	STAT5_hi_dDHS	Peak_40079	chr2	163421556	163422753	40948	1192
chr2	164182221	164182780	STAT5_hi_dDHS	Peak_40110	chr2	164182219	164182670	40976	449
chr2	164258021	164258760	STAT5_hi_dDHS	Peak_40116	.	-1	-1	.	0
chr2	164840481	164840680	STAT5_hi_dDHS	Peak_40176	.	-1	-1	.	0
chr2	165744881	165746180	STAT5_hi_dDHS	Peak_40226	chr2	165745060	165745687	41099	627
chr2	167118821	167119140	STAT5_hi_dDHS	Peak_40320	chr2	167118886	167119169	41208	254
chr2	167592981	167593200	STAT5_hi_dDHS	Peak_40384	chr2	167592949	167593232	41275	219
chr2	167750381	167751420	STAT5_hi_dDHS	Peak_40411	chr2	167750370	167751117	41308	736
chr2	167784161	167785560	STAT5_hi_dDHS	Peak_40416	chr2	167784234	167785380	41312	1146
chr2	167808101	167808960	STAT5_hi_dDHS	Peak_40417	chr2	167808117	167808871	41313	754
chr2	168357501	168358040	STAT5_hi_dDHS	Peak_40447	chr2	168357521	168357898	41337	377
chr2	169460021	169460440	STAT5_hi_dDHS	Peak_40474	.	-1	-1	.	0
chr2	169978501	169979700	STAT5_hi_dDHS	Peak_40514	chr2	169978744	169979422	41401	678
chr2	170034441	170035200	STAT5_hi_dDHS	Peak_40523	chr2	170034377	170035207	41405	759
chr2	178331361	178331740	STAT5_hi_dDHS	Peak_40657	.	-1	-1	.	0
chr2	181337061	181337500	STAT5_hi_dDHS	Peak_40768	.	-1	-1	.	0
chr2	181350081	181350880	STAT5_hi_dDHS	Peak_40769	.	-1	-1	.	0
chr2	181350921	181351760	STAT5_hi_dDHS	Peak_40770	.	-1	-1	.	0
chr3	5235521	5236120	STAT5_hi_dDHS	Peak_40798	.	-1	-1	.	0
chr3	9521701	9522360	STAT5_hi_dDHS	Peak_40850	chr3	9521830	9522795	41768	530
chr3	10123461	10124140	STAT5_hi_dDHS	Peak_40883	chr3	10123560	10124414	41797	580
chr3	10127141	10128160	STAT5_hi_dDHS	Peak_40884	chr3	10127024	10128084	41798	943
chr3	10129001	10129900	STAT5_hi_dDHS	Peak_40885	chr3	10128679	10129787	41799	786
chr3	10173581	10174440	STAT5_hi_dDHS	Peak_40888	chr3	10173727	10174483	41804	713
chr3	10304701	10305380	STAT5_hi_dDHS	Peak_40901	chr3	10305058	10305842	41819	322
chr3	10370601	10371160	STAT5_hi_dDHS	Peak_40911	chr3	10370739	10371038	41836	299
chr3	11357441	11358000	STAT5_hi_dDHS	Peak_40921	.	-1	-1	.	0
chr3	14840801	14841360	STAT5_hi_dDHS	Peak_40962	chr3	14840839	14841048	41868	209
chr3	15201041	15201740	STAT5_hi_dDHS	Peak_40977	chr3	15201238	15201614	41888	376
chr3	18145941	18146940	STAT5_hi_dDHS	Peak_41002	chr3	18145123	18146785	41909	844
chr3	18150761	18151620	STAT5_hi_dDHS	Peak_41003	chr3	18150985	18151541	41910	556
chr3	18154081	18154920	STAT5_hi_dDHS	Peak_41004	chr3	18154219	18154971	41911	701
chr3	18167501	18167880	STAT5_hi_dDHS	Peak_41005	chr3	18167597	18167786	41912	189
chr3	18199201	18199740	STAT5_hi_dDHS	Peak_41007	chr3	18198636	18199338	41914	137
chr3	18242901	18243820	STAT5_hi_dDHS	Peak_41008	chr3	18243081	18243486	41915	405
chr3	18328461	18329380	STAT5_hi_dDHS	Peak_41011	chr3	18328583	18329415	41918	797
chr3	18523761	18524300	STAT5_hi_dDHS	Peak_41020	chr3	18523799	18524309	41922	501
chr3	18776721	18777480	STAT5_hi_dDHS	Peak_41024	chr3	18776783	18777437	41924	654
chr3	19856561	19857540	STAT5_hi_dDHS	Peak_41061	chr3	19856888	19857456	41952	568
chr3	19872701	19873200	STAT5_hi_dDHS	Peak_41065	chr3	19872968	19873144	41956	176
chr3	21804481	21805020	STAT5_hi_dDHS	Peak_41092	chr3	21804710	21805001	41975	291
chr3	24443821	24444460	STAT5_hi_dDHS	Peak_41139	.	-1	-1	.	0
chr3	27044301	27045080	STAT5_hi_dDHS	Peak_41160	chr3	27044403	27045288	42017	677
chr3	27054761	27055660	STAT5_hi_dDHS	Peak_41162	chr3	27055064	27055373	42019	309
chr3	27087461	27087720	STAT5_hi_dDHS	Peak_41164	chr3	27087386	27087711	42021	250
chr3	27515161	27516420	STAT5_hi_dDHS	Peak_41199	chr3	27515326	27516076	42054	750
chr3	27684801	27685220	STAT5_hi_dDHS	Peak_41210	.	-1	-1	.	0
chr3	27779141	27779580	STAT5_hi_dDHS	Peak_41214	.	-1	-1	.	0
chr3	27803641	27804740	STAT5_hi_dDHS	Peak_41216	chr3	27803762	27804622	42068	860
chr3	27806341	27806740	STAT5_hi_dDHS	Peak_41217	chr3	27806283	27806581	42069	240
chr3	27808241	27808760	STAT5_hi_dDHS	Peak_41218	.	-1	-1	.	0
chr3	28366361	28367100	STAT5_hi_dDHS	Peak_41234	.	-1	-1	.	0
chr3	28479961	28480400	STAT5_hi_dDHS	Peak_41237	chr3	28480011	28480282	42086	271
chr3	28490201	28490760	STAT5_hi_dDHS	Peak_41238	chr3	28490309	28490701	42087	392
chr3	28628741	28629220	STAT5_hi_dDHS	Peak_41250	.	-1	-1	.	0
chr3	30152601	30153160	STAT5_hi_dDHS	Peak_41272	chr3	30152685	30153088	42117	403
chr3	30701201	30701460	STAT5_hi_dDHS	Peak_41293	.	-1	-1	.	0
chr3	30974601	30975200	STAT5_hi_dDHS	Peak_41307	chr3	30974720	30975233	42141	480
chr3	35040541	35040760	STAT5_hi_dDHS	Peak_41365	chr3	35040463	35040667	42190	126
chr3	37787261	37787980	STAT5_hi_dDHS	Peak_41437	chr3	37787319	37787820	42252	501
chr3	38259101	38259660	STAT5_hi_dDHS	Peak_41460	chr3	38259190	38259503	42273	313
chr3	51036121	51036420	STAT5_hi_dDHS	Peak_41595	chr3	51036301	51036758	42382	119
chr3	51176641	51177360	STAT5_hi_dDHS	Peak_41607	chr3	51176749	51177190	42391	441
chr3	51814961	51815620	STAT5_hi_dDHS	Peak_41641	chr3	51815154	51815589	42414	435
chr3	51821581	51822100	STAT5_hi_dDHS	Peak_41643	chr3	51821468	51821621	42415	40
chr3	52306161	52306860	STAT5_hi_dDHS	Peak_41674	chr3	52305421	52307121	42442	699
chr3	52421321	52421900	STAT5_hi_dDHS	Peak_41682	chr3	52421344	52421761	42449	417
chr3	57146841	57147220	STAT5_hi_dDHS	Peak_41762	.	-1	-1	.	0
chr3	58176141	58177100	STAT5_hi_dDHS	Peak_41801	chr3	58176204	58177028	42543	824
chr3	58311941	58312760	STAT5_hi_dDHS	Peak_41805	chr3	58312293	58312657	42546	364
chr3	59944381	59944760	STAT5_hi_dDHS	Peak_41869	.	-1	-1	.	0
chr3	59944961	59945620	STAT5_hi_dDHS	Peak_41870	chr3	59945137	59945702	42597	483
chr3	60329181	60329800	STAT5_hi_dDHS	Peak_41890	chr3	60329305	60329489	42608	184
chr3	62152841	62153900	STAT5_hi_dDHS	Peak_41925	chr3	62151998	62153948	42635	1059
chr3	65415881	65416760	STAT5_hi_dDHS	Peak_41971	chr3	65416013	65416640	42665	627
chr3	65662041	65662600	STAT5_hi_dDHS	Peak_41981	chr3	65662032	65662617	42671	559
chr3	65662861	65663180	STAT5_hi_dDHS	Peak_41982	chr3	65662829	65663415	42672	319
chr3	65738801	65739640	STAT5_hi_dDHS	Peak_41987	chr3	65738917	65739494	42681	577
chr3	65777501	65778040	STAT5_hi_dDHS	Peak_41991	.	-1	-1	.	0
chr3	66169161	66169760	STAT5_hi_dDHS	Peak_42004	chr3	66169258	66169654	42691	396
chr3	67471061	67471360	STAT5_hi_dDHS	Peak_42037	chr3	67471033	67471213	42719	152
chr3	67475761	67476320	STAT5_hi_dDHS	Peak_42038	chr3	67475789	67476096	42720	307
chr3	67480881	67481440	STAT5_hi_dDHS	Peak_42039	chr3	67480992	67481299	42721	307
chr3	69161901	69162740	STAT5_hi_dDHS	Peak_42079	chr3	69161837	69162692	42754	791
chr3	69165961	69166580	STAT5_hi_dDHS	Peak_42080	chr3	69166036	69166456	42755	420
chr3	73504481	73505000	STAT5_hi_dDHS	Peak_42116	chr3	73504584	73504872	42775	288
chr3	75334681	75335460	STAT5_hi_dDHS	Peak_42135	chr3	75334904	75335352	42786	448
chr3	75591561	75592020	STAT5_hi_dDHS	Peak_42139	chr3	75591593	75592069	42790	427
chr3	76440881	76441360	STAT5_hi_dDHS	Peak_42152	.	-1	-1	.	0
chr3	79046021	79046640	STAT5_hi_dDHS	Peak_42193	chr3	79046181	79046660	42820	459
chr3	79177921	79178460	STAT5_hi_dDHS	Peak_42205	.	-1	-1	.	0
chr3	79346441	79346960	STAT5_hi_dDHS	Peak_42217	chr3	79346569	79346830	42842	261
chr3	80813821	80814520	STAT5_hi_dDHS	Peak_42249	chr3	80813727	80814216	42864	395
chr3	80855541	80855960	STAT5_hi_dDHS	Peak_42255	.	-1	-1	.	0
chr3	82804141	82804920	STAT5_hi_dDHS	Peak_42304	chr3	82804395	82805147	42913	525
chr3	82808581	82809540	STAT5_hi_dDHS	Peak_42306	chr3	82808701	82809314	42916	613
chr3	82818841	82821660	STAT5_hi_dDHS	Peak_42311	chr3	82819741	82821299	42922	1558
chr3	82826501	82827500	STAT5_hi_dDHS	Peak_42313	chr3	82826745	82827035	42925	290
chr3	82829381	82830340	STAT5_hi_dDHS	Peak_42314	chr3	82829344	82830427	42926	959
chr3	82833181	82839500	STAT5_hi_dDHS	Peak_42315	chr3	82836269	82838199	42928	1930
chr3	82843601	82847660	STAT5_hi_dDHS	Peak_42316	chr3	82846317	82846730	42931	413
chr3	82877301	82878060	STAT5_hi_dDHS	Peak_42322	chr3	82877315	82877833	42939	518
chr3	83666661	83667320	STAT5_hi_dDHS	Peak_42332	chr3	83666776	83667414	42945	544
chr3	83704121	83704580	STAT5_hi_dDHS	Peak_42336	chr3	83703325	83705191	42948	459
chr3	84233161	84233640	STAT5_hi_dDHS	Peak_42391	chr3	84233292	84233590	42998	298
chr3	85649141	85649640	STAT5_hi_dDHS	Peak_42443	chr3	85648858	85649710	43036	499
chr3	85938861	85939380	STAT5_hi_dDHS	Peak_42463	chr3	85938957	85939388	43047	423
chr3	91287501	91287860	STAT5_hi_dDHS	Peak_42716	chr3	91287347	91287808	43326	307
chr3	93251241	93252140	STAT5_hi_dDHS	Peak_42724	chr3	93250986	93252026	43331	785
chr3	94516081	94516580	STAT5_hi_dDHS	Peak_42767	.	-1	-1	.	0
chr3	95238901	95239600	STAT5_hi_dDHS	Peak_42825	.	-1	-1	.	0
chr3	95243741	95244060	STAT5_hi_dDHS	Peak_42826	chr3	95243565	95243862	43437	121
chr3	95472641	95473540	STAT5_hi_dDHS	Peak_42844	chr3	95472576	95473321	43448	680
chr3	95936981	95937540	STAT5_hi_dDHS	Peak_42881	chr3	95937184	95937721	43485	356
chr3	97424601	97425060	STAT5_hi_dDHS	Peak_42969	.	-1	-1	.	0
chr3	97792241	97792720	STAT5_hi_dDHS	Peak_42995	chr3	97792242	97792484	43598	242
chr3	98053761	98054380	STAT5_hi_dDHS	Peak_43022	chr3	98053789	98054216	43632	427
chr3	98449981	98450760	STAT5_hi_dDHS	Peak_43041	chr3	98450087	98450482	43664	395
chr3	98486081	98486420	STAT5_hi_dDHS	Peak_43044	chr3	98486020	98486682	43666	339
chr3	98491241	98491620	STAT5_hi_dDHS	Peak_43045	chr3	98491331	98491940	43668	289
chr3	98657541	98658120	STAT5_hi_dDHS	Peak_43057	chr3	98657590	98658025	43681	435
chr3	98663541	98664040	STAT5_hi_dDHS	Peak_43058	chr3	98663626	98663839	43682	213
chr3	103913361	103914060	STAT5_hi_dDHS	Peak_43184	.	-1	-1	.	0
chr3	103945981	103946600	STAT5_hi_dDHS	Peak_43185	chr3	103946101	103946940	43810	499
chr3	104025021	104025780	STAT5_hi_dDHS	Peak_43191	chr3	104024072	104025724	43814	703
chr3	104337101	104337420	STAT5_hi_dDHS	Peak_43207	chr3	104337222	104337393	43828	171
chr3	104404541	104405280	STAT5_hi_dDHS	Peak_43215	.	-1	-1	.	0
chr3	105542681	105543240	STAT5_hi_dDHS	Peak_43253	chr3	105542844	105543110	43872	266
chr3	106123001	106123640	STAT5_hi_dDHS	Peak_43271	chr3	106122976	106123333	43887	332
chr3	106347701	106348260	STAT5_hi_dDHS	Peak_43280	chr3	106347789	106348294	43894	471
chr3	106349621	106350400	STAT5_hi_dDHS	Peak_43281	chr3	106349864	106351522	43895	536
chr3	107041401	107041920	STAT5_hi_dDHS	Peak_43295	chr3	107041149	107041976	43906	519
chr3	107500281	107500840	STAT5_hi_dDHS	Peak_43310	.	-1	-1	.	0
chr3	107817821	107818400	STAT5_hi_dDHS	Peak_43344	chr3	107817913	107818257	43953	344
chr3	107926961	107927480	STAT5_hi_dDHS	Peak_43357	.	-1	-1	.	0
chr3	115315121	115316160	STAT5_hi_dDHS	Peak_43469	chr3	115315791	115316610	44057	369
chr3	115322801	115323380	STAT5_hi_dDHS	Peak_43471	chr3	115322952	115323205	44059	253
chr3	115349841	115350640	STAT5_hi_dDHS	Peak_43475	chr3	115349902	115350511	44065	609
chr3	115522641	115522900	STAT5_hi_dDHS	Peak_43490	.	-1	-1	.	0
chr3	116501881	116502860	STAT5_hi_dDHS	Peak_43541	chr3	116501916	116502653	44114	737
chr3	116548981	116549640	STAT5_hi_dDHS	Peak_43544	chr3	116549100	116549571	44118	471
chr3	116613621	116613980	STAT5_hi_dDHS	Peak_43549	chr3	116613477	116613888	44123	267
chr3	116637461	116637960	STAT5_hi_dDHS	Peak_43551	.	-1	-1	.	0
chr3	116670241	116671080	STAT5_hi_dDHS	Peak_43556	chr3	116670363	116670804	44131	441
chr3	118179941	118180520	STAT5_hi_dDHS	Peak_43577	.	-1	-1	.	0
chr3	118311581	118311980	STAT5_hi_dDHS	Peak_43589	chr3	118311718	118311862	44158	144
chr3	118486801	118487200	STAT5_hi_dDHS	Peak_43600	.	-1	-1	.	0
chr3	118868561	118869260	STAT5_hi_dDHS	Peak_43609	chr3	118868686	118869098	44162	412
chr3	120412361	120412960	STAT5_hi_dDHS	Peak_43630	.	-1	-1	.	0
chr3	120902801	120903040	STAT5_hi_dDHS	Peak_43637	chr3	120902736	120903106	44184	239
chr3	121387141	121387900	STAT5_hi_dDHS	Peak_43678	chr3	121387123	121388425	44224	759
chr3	126806801	126807100	STAT5_hi_dDHS	Peak_43830	.	-1	-1	.	0
chr3	127483101	127483480	STAT5_hi_dDHS	Peak_43849	chr3	127482926	127483575	44366	379
chr3	127483541	127483760	STAT5_hi_dDHS	Peak_43850	chr3	127482926	127483575	44366	34
chr3	127491601	127492300	STAT5_hi_dDHS	Peak_43852	.	-1	-1	.	0
chr3	127511721	127512560	STAT5_hi_dDHS	Peak_43858	chr3	127511518	127512577	44372	839
chr3	127542081	127542720	STAT5_hi_dDHS	Peak_43861	chr3	127542377	127542557	44374	180
chr3	127551101	127551600	STAT5_hi_dDHS	Peak_43863	chr3	127551094	127551280	44376	179
chr3	129153581	129154120	STAT5_hi_dDHS	Peak_43886	chr3	129153601	129154064	44396	463
chr3	129549881	129550220	STAT5_hi_dDHS	Peak_43920	chr3	129549870	129549994	44432	113
chr3	129761581	129762280	STAT5_hi_dDHS	Peak_43929	chr3	129761536	129762159	44440	578
chr3	129917341	129917600	STAT5_hi_dDHS	Peak_43938	chr3	129917377	129918114	44446	223
chr3	129917621	129917940	STAT5_hi_dDHS	Peak_43939	chr3	129917377	129918114	44446	319
chr3	130112361	130113040	STAT5_hi_dDHS	Peak_43945	chr3	130112458	130112852	44450	394
chr3	130143381	130144020	STAT5_hi_dDHS	Peak_43946	chr3	130143391	130144111	44451	629
chr3	131039661	131040160	STAT5_hi_dDHS	Peak_43982	.	-1	-1	.	0
chr3	131067261	131068500	STAT5_hi_dDHS	Peak_43985	chr3	131067184	131068207	44496	946
chr3	131273221	131273900	STAT5_hi_dDHS	Peak_44002	.	-1	-1	.	0
chr3	131308101	131308400	STAT5_hi_dDHS	Peak_44004	chr3	131308184	131308506	44506	216
chr3	132142081	132142720	STAT5_hi_dDHS	Peak_44015	chr3	132142096	132142624	44510	528
chr3	132306461	132307580	STAT5_hi_dDHS	Peak_44018	chr3	132307016	132307490	44515	474
chr3	133403241	133404040	STAT5_hi_dDHS	Peak_44054	chr3	133403415	133403767	44535	352
chr3	133422281	133423060	STAT5_hi_dDHS	Peak_44057	chr3	133422581	133423046	44538	465
chr3	135161781	135162380	STAT5_hi_dDHS	Peak_44084	chr3	135161757	135162201	44566	420
chr3	136337361	136337820	STAT5_hi_dDHS	Peak_44113	chr3	136337368	136337734	44591	366
chr3	137875361	137876240	STAT5_hi_dDHS	Peak_44151	chr3	137875022	137876295	44620	879
chr3	137891361	137892120	STAT5_hi_dDHS	Peak_44156	chr3	137891369	137891950	44625	581
chr3	137923661	137924060	STAT5_hi_dDHS	Peak_44166	chr3	137923741	137924101	44638	319
chr3	138025761	138026420	STAT5_hi_dDHS	Peak_44181	chr3	138025943	138026273	44655	330
chr3	138040201	138040580	STAT5_hi_dDHS	Peak_44184	chr3	138039955	138040794	44657	379
chr3	142048621	142049320	STAT5_hi_dDHS	Peak_44233	chr3	142048716	142049065	44692	349
chr3	142192921	142193480	STAT5_hi_dDHS	Peak_44243	chr3	142192949	142193720	44703	531
chr3	142402741	142403340	STAT5_hi_dDHS	Peak_44251	chr3	142402744	142403443	44717	596
chr3	143773361	143774040	STAT5_hi_dDHS	Peak_44271	chr3	143773337	143774018	44727	657
chr3	144108901	144109760	STAT5_hi_dDHS	Peak_44285	chr3	144109201	144109601	44738	400
chr3	144240301	144241340	STAT5_hi_dDHS	Peak_44289	chr3	144240297	144241404	44743	1039
chr3	145438741	145439400	STAT5_hi_dDHS	Peak_44321	chr3	145438766	145439159	44772	393
chr3	145486721	145487060	STAT5_hi_dDHS	Peak_44331	chr3	145486735	145486961	44780	226
chr3	146230641	146231220	STAT5_hi_dDHS	Peak_44371	chr3	146230445	146231660	44814	579
chr3	148342821	148343600	STAT5_hi_dDHS	Peak_44400	chr3	148343083	148343489	44851	406
chr3	148343641	148344000	STAT5_hi_dDHS	Peak_44401	chr3	148343665	148344461	44852	335
chr3	148344041	148344320	STAT5_hi_dDHS	Peak_44402	chr3	148343665	148344461	44852	279
chr3	148347881	148348420	STAT5_hi_dDHS	Peak_44404	chr3	148347827	148348539	44854	539
chr3	148628681	148629080	STAT5_hi_dDHS	Peak_44415	chr3	148628886	148629077	44863	191
chr3	148664161	148664540	STAT5_hi_dDHS	Peak_44419	chr3	148663980	148664720	44868	379
chr3	148832281	148832620	STAT5_hi_dDHS	Peak_44428	chr3	148832369	148832852	44880	251
chr3	148833161	148833740	STAT5_hi_dDHS	Peak_44429	chr3	148833056	148833665	44881	504
chr3	148878461	148879280	STAT5_hi_dDHS	Peak_44435	chr3	148878715	148879155	44887	440
chr3	148896681	148897400	STAT5_hi_dDHS	Peak_44438	chr3	148896723	148897329	44891	606
chr3	148902401	148902960	STAT5_hi_dDHS	Peak_44439	.	-1	-1	.	0
chr3	149099881	149101520	STAT5_hi_dDHS	Peak_44448	chr3	149099771	149101428	44896	1547
chr3	149509381	149509700	STAT5_hi_dDHS	Peak_44463	chr3	149509032	149509657	44903	276
chr3	149535061	149535920	STAT5_hi_dDHS	Peak_44465	.	-1	-1	.	0
chr3	149583141	149583360	STAT5_hi_dDHS	Peak_44467	chr3	149583169	149583727	44905	191
chr3	149814141	149814800	STAT5_hi_dDHS	Peak_44471	chr3	149814581	149815070	44907	219
chr3	151892181	151892620	STAT5_hi_dDHS	Peak_44505	chr3	151892182	151892526	44939	344
chr3	151910821	151911260	STAT5_hi_dDHS	Peak_44508	.	-1	-1	.	0
chr3	157260941	157261260	STAT5_hi_dDHS	Peak_44577	chr3	157260973	157261264	44993	287
chr4	3604281	3605120	STAT5_hi_dDHS	Peak_44630	chr4	3604485	3606344	45030	635
chr4	6189261	6190660	STAT5_hi_dDHS	Peak_44662	chr4	6189294	6190628	45062	1334
chr4	6835841	6836340	STAT5_hi_dDHS	Peak_44678	chr4	6836025	6836407	45083	315
chr4	8614901	8615500	STAT5_hi_dDHS	Peak_44714	chr4	8615066	8615428	45118	362
chr4	9010481	9011160	STAT5_hi_dDHS	Peak_44740	chr4	9010623	9011471	45149	537
chr4	9172681	9173180	STAT5_hi_dDHS	Peak_44746	chr4	9172730	9173172	45159	442
chr4	10386241	10387060	STAT5_hi_dDHS	Peak_44761	.	-1	-1	.	0
chr4	11162481	11163060	STAT5_hi_dDHS	Peak_44788	chr4	11162624	11162995	45202	371
chr4	15965381	15965900	STAT5_hi_dDHS	Peak_44873	chr4	15965645	15966334	45281	255
chr4	16095481	16096240	STAT5_hi_dDHS	Peak_44878	chr4	16095478	16095894	45287	413
chr4	16125761	16126300	STAT5_hi_dDHS	Peak_44879	.	-1	-1	.	0
chr4	16126621	16127040	STAT5_hi_dDHS	Peak_44880	chr4	16126636	16126954	45288	318
chr4	19945041	19945480	STAT5_hi_dDHS	Peak_44919	chr4	19945450	19945749	45322	30
chr4	25358941	25359580	STAT5_hi_dDHS	Peak_44958	chr4	25359047	25359963	45353	533
chr4	32332581	32333200	STAT5_hi_dDHS	Peak_44986	chr4	32332415	32334215	45370	619
chr4	32605921	32606520	STAT5_hi_dDHS	Peak_45003	chr4	32606135	32606454	45387	319
chr4	33349001	33349540	STAT5_hi_dDHS	Peak_45031	chr4	33348117	33349443	45412	442
chr4	34741241	34741960	STAT5_hi_dDHS	Peak_45055	chr4	34741474	34741762	45427	288
chr4	34744521	34744880	STAT5_hi_dDHS	Peak_45056	.	-1	-1	.	0
chr4	34913481	34914120	STAT5_hi_dDHS	Peak_45063	chr4	34913345	34914231	45441	639
chr4	34996261	34996860	STAT5_hi_dDHS	Peak_45073	chr4	34996230	34996580	45453	319
chr4	35068281	35068640	STAT5_hi_dDHS	Peak_45083	.	-1	-1	.	0
chr4	35093721	35094040	STAT5_hi_dDHS	Peak_45090	.	-1	-1	.	0
chr4	35480821	35481340	STAT5_hi_dDHS	Peak_45104	.	-1	-1	.	0
chr4	39503181	39503860	STAT5_hi_dDHS	Peak_45128	chr4	39503238	39504306	45496	622
chr4	40100181	40100520	STAT5_hi_dDHS	Peak_45134	.	-1	-1	.	0
chr4	40681981	40682340	STAT5_hi_dDHS	Peak_45165	.	-1	-1	.	0
chr4	40799001	40799960	STAT5_hi_dDHS	Peak_45180	.	-1	-1	.	0
chr4	45497781	45498340	STAT5_hi_dDHS	Peak_45359	chr4	45497994	45498305	45777	311
chr4	46876481	46877380	STAT5_hi_dDHS	Peak_45425	chr4	46876607	46877190	45860	583
chr4	47374501	47374920	STAT5_hi_dDHS	Peak_45449	.	-1	-1	.	0
chr4	47379381	47379700	STAT5_hi_dDHS	Peak_45451	.	-1	-1	.	0
chr4	49399681	49400140	STAT5_hi_dDHS	Peak_45496	chr4	49399608	49400078	45932	397
chr4	49464941	49465280	STAT5_hi_dDHS	Peak_45500	chr4	49464475	49465000	45938	59
chr4	49519981	49520540	STAT5_hi_dDHS	Peak_45509	chr4	49519980	49520364	45947	383
chr4	52828601	52829220	STAT5_hi_dDHS	Peak_45541	chr4	52828623	52829130	45979	507
chr4	53131321	53132100	STAT5_hi_dDHS	Peak_45554	chr4	53131437	53131886	46000	449
chr4	53159081	53159820	STAT5_hi_dDHS	Peak_45561	chr4	53159283	53160183	46010	537
chr4	53259161	53259620	STAT5_hi_dDHS	Peak_45575	chr4	53259277	53259449	46028	172
chr4	53609161	53610120	STAT5_hi_dDHS	Peak_45602	.	-1	-1	.	0
chr4	54887381	54888200	STAT5_hi_dDHS	Peak_45619	chr4	54887234	54887994	46067	613
chr4	54973581	54973880	STAT5_hi_dDHS	Peak_45623	chr4	54973624	54973987	46072	256
chr4	55365861	55366260	STAT5_hi_dDHS	Peak_45639	chr4	55366017	55366275	46085	243
chr4	55762781	55763460	STAT5_hi_dDHS	Peak_45653	chr4	55762729	55763461	46100	679
chr4	57126481	57127400	STAT5_hi_dDHS	Peak_45683	chr4	57126782	57127282	46131	500
chr4	57127501	57128200	STAT5_hi_dDHS	Peak_45684	chr4	57127578	57128586	46132	622
chr4	57135741	57136380	STAT5_hi_dDHS	Peak_45688	chr4	57135902	57136382	46136	478
chr4	57151001	57151580	STAT5_hi_dDHS	Peak_45690	chr4	57150273	57151727	46139	579
chr4	57297921	57298660	STAT5_hi_dDHS	Peak_45701	chr4	57297702	57298587	46149	666
chr4	57310901	57311460	STAT5_hi_dDHS	Peak_45703	chr4	57311015	57311387	46151	372
chr4	57967761	57968560	STAT5_hi_dDHS	Peak_45738	.	-1	-1	.	0
chr4	59335861	59336740	STAT5_hi_dDHS	Peak_45779	chr4	59335597	59336584	46223	723
chr4	62035441	62036000	STAT5_hi_dDHS	Peak_45855	chr4	62035510	62035732	46323	222
chr4	62384681	62385440	STAT5_hi_dDHS	Peak_45880	chr4	62384349	62385579	46355	759
chr4	62819141	62819640	STAT5_hi_dDHS	Peak_45902	chr4	62819097	62820365	46383	499
chr4	62999421	63000380	STAT5_hi_dDHS	Peak_45918	chr4	62999411	63000262	46396	841
chr4	63003401	63004040	STAT5_hi_dDHS	Peak_45919	chr4	63003460	63003944	46399	484
chr4	63214521	63216180	STAT5_hi_dDHS	Peak_45934	chr4	63214724	63216332	46426	1456
chr4	64741241	64741920	STAT5_hi_dDHS	Peak_45945	chr4	64741348	64741748	46444	400
chr4	65209381	65210000	STAT5_hi_dDHS	Peak_45956	chr4	65209533	65209899	46454	366
chr4	65226641	65226920	STAT5_hi_dDHS	Peak_45957	chr4	65226618	65226810	46455	169
chr4	66785921	66786340	STAT5_hi_dDHS	Peak_45974	.	-1	-1	.	0
chr4	71012781	71013380	STAT5_hi_dDHS	Peak_46005	.	-1	-1	.	0
chr4	71845421	71846020	STAT5_hi_dDHS	Peak_46032	chr4	71845451	71845953	46499	502
chr4	72606701	72607420	STAT5_hi_dDHS	Peak_46043	chr4	72606772	72608099	46505	648
chr4	75801521	75801980	STAT5_hi_dDHS	Peak_46062	chr4	75801615	75802005	46515	365
chr4	76588001	76588300	STAT5_hi_dDHS	Peak_46089	chr4	76587363	76588141	46535	140
chr4	76608141	76609080	STAT5_hi_dDHS	Peak_46091	chr4	76608555	76608905	46536	350
chr4	81160341	81161100	STAT5_hi_dDHS	Peak_46122	chr4	81160420	81160985	46567	565
chr4	81376321	81376820	STAT5_hi_dDHS	Peak_46131	chr4	81376317	81376753	46574	432
chr4	81937181	81937760	STAT5_hi_dDHS	Peak_46145	chr4	81937449	81937663	46586	214
chr4	95619881	95620440	STAT5_hi_dDHS	Peak_46400	chr4	95619958	95620394	46825	436
chr4	96288401	96289480	STAT5_hi_dDHS	Peak_46405	.	-1	-1	.	0
chr4	96668521	96668820	STAT5_hi_dDHS	Peak_46414	.	-1	-1	.	0
chr4	96769281	96769880	STAT5_hi_dDHS	Peak_46422	chr4	96769294	96769752	46848	458
chr4	96773341	96773900	STAT5_hi_dDHS	Peak_46423	chr4	96773458	96773725	46849	267
chr4	97413181	97413560	STAT5_hi_dDHS	Peak_46429	chr4	97412480	97413451	46851	270
chr4	97599801	97600360	STAT5_hi_dDHS	Peak_46459	chr4	97599958	97600177	46889	219
chr4	100074161	100074860	STAT5_hi_dDHS	Peak_46548	chr4	100073772	100074723	46965	562
chr4	101414301	101415000	STAT5_hi_dDHS	Peak_46609	chr4	101414342	101414920	47043	578
chr4	102199861	102200640	STAT5_hi_dDHS	Peak_46628	chr4	102200049	102200317	47056	268
chr4	102205801	102206220	STAT5_hi_dDHS	Peak_46629	chr4	102205855	102206104	47057	249
chr4	102296721	102297120	STAT5_hi_dDHS	Peak_46642	chr4	102296798	102297297	47076	322
chr4	102309861	102310580	STAT5_hi_dDHS	Peak_46643	chr4	102309933	102310799	47077	647
chr4	102319361	102319780	STAT5_hi_dDHS	Peak_46644	chr4	102319598	102319783	47078	182
chr4	102523101	102523740	STAT5_hi_dDHS	Peak_46658	chr4	102523137	102523440	47085	303
chr4	104057201	104057720	STAT5_hi_dDHS	Peak_46699	chr4	104057269	104057654	47119	385
chr4	104057961	104058360	STAT5_hi_dDHS	Peak_46700	chr4	104057980	104058223	47120	243
chr4	104192281	104192740	STAT5_hi_dDHS	Peak_46703	.	-1	-1	.	0
chr4	104202761	104203480	STAT5_hi_dDHS	Peak_46705	chr4	104202729	104203277	47123	516
chr4	104436301	104436860	STAT5_hi_dDHS	Peak_46707	chr4	104436381	104436857	47124	476
chr4	104438521	104439380	STAT5_hi_dDHS	Peak_46708	chr4	104438645	104439308	47125	663
chr4	104440541	104441180	STAT5_hi_dDHS	Peak_46709	chr4	104440590	104441214	47127	590
chr4	104512521	104513380	STAT5_hi_dDHS	Peak_46718	chr4	104512188	104513196	47142	675
chr4	104580841	104581580	STAT5_hi_dDHS	Peak_46724	chr4	104581207	104581476	47147	269
chr4	104635221	104635700	STAT5_hi_dDHS	Peak_46729	.	-1	-1	.	0
chr4	104644981	104645540	STAT5_hi_dDHS	Peak_46730	chr4	104645354	104645544	47154	186
chr4	104766621	104766980	STAT5_hi_dDHS	Peak_46741	chr4	104766646	104766865	47163	219
chr4	104773441	104774260	STAT5_hi_dDHS	Peak_46744	chr4	104773619	104774162	47165	543
chr4	104776761	104777720	STAT5_hi_dDHS	Peak_46745	chr4	104777074	104777464	47166	390
chr4	104864701	104865100	STAT5_hi_dDHS	Peak_46761	.	-1	-1	.	0
chr4	105000381	105001840	STAT5_hi_dDHS	Peak_46779	chr4	105000637	105002249	47215	1203
chr4	105305561	105305840	STAT5_hi_dDHS	Peak_46792	chr4	105305627	105305914	47228	213
chr4	105864441	105864840	STAT5_hi_dDHS	Peak_46806	chr4	105864502	105864746	47239	244
chr4	106520301	106521840	STAT5_hi_dDHS	Peak_46845	chr4	106520507	106521811	47289	1304
chr4	106893881	106894520	STAT5_hi_dDHS	Peak_46873	chr4	106894004	106894605	47324	516
chr4	107756401	107757340	STAT5_hi_dDHS	Peak_46909	chr4	107755689	107756477	47395	76
chr4	107757621	107758660	STAT5_hi_dDHS	Peak_46910	.	-1	-1	.	0
chr4	107762741	107764020	STAT5_hi_dDHS	Peak_46911	chr4	107763200	107763835	47396	635
chr4	107775701	107776200	STAT5_hi_dDHS	Peak_46912	.	-1	-1	.	0
chr4	107776601	107777160	STAT5_hi_dDHS	Peak_46913	chr4	107776579	107776826	47404	225
chr4	107783341	107783940	STAT5_hi_dDHS	Peak_46914	.	-1	-1	.	0
chr4	107796321	107797180	STAT5_hi_dDHS	Peak_46918	chr4	107796397	107797012	47412	615
chr4	107798861	107799640	STAT5_hi_dDHS	Peak_46919	chr4	107798745	107799549	47413	688
chr4	107802941	107803840	STAT5_hi_dDHS	Peak_46920	chr4	107803046	107803826	47414	780
chr4	107897561	107898440	STAT5_hi_dDHS	Peak_46927	chr4	107897666	107898716	47420	774
chr4	108034881	108035860	STAT5_hi_dDHS	Peak_46942	chr4	108035112	108035649	47441	537
chr4	108779081	108779740	STAT5_hi_dDHS	Peak_46977	chr4	108779273	108779735	47468	462
chr4	108989641	108990560	STAT5_hi_dDHS	Peak_46992	chr4	108989889	108990454	47480	565
chr4	109478601	109478940	STAT5_hi_dDHS	Peak_47017	chr4	109478675	109478819	47508	144
chr4	114542661	114543220	STAT5_hi_dDHS	Peak_47040	chr4	114542460	114543305	47521	559
chr4	116137201	116137600	STAT5_hi_dDHS	Peak_47106	chr4	116136259	116137566	47589	365
chr4	116404941	116405540	STAT5_hi_dDHS	Peak_47126	chr4	116405037	116405371	47613	334
chr4	116767241	116768220	STAT5_hi_dDHS	Peak_47147	chr4	116767578	116767923	47633	345
chr4	116807241	116808140	STAT5_hi_dDHS	Peak_47152	.	-1	-1	.	0
chr4	118172321	118173500	STAT5_hi_dDHS	Peak_47261	chr4	118172727	118173317	47780	590
chr4	118215821	118216120	STAT5_hi_dDHS	Peak_47267	.	-1	-1	.	0
chr4	120665521	120666040	STAT5_hi_dDHS	Peak_47343	.	-1	-1	.	0
chr4	120695641	120696340	STAT5_hi_dDHS	Peak_47346	chr4	120695876	120697247	47884	464
chr4	120835981	120836740	STAT5_hi_dDHS	Peak_47348	chr4	120836110	120836629	47888	519
chr4	120839801	120840840	STAT5_hi_dDHS	Peak_47349	chr4	120840246	120840791	47891	545
chr4	120857101	120857760	STAT5_hi_dDHS	Peak_47353	chr4	120857224	120857476	47892	252
chr4	122612821	122613660	STAT5_hi_dDHS	Peak_47361	chr4	122612793	122613503	47899	682
chr4	122635821	122636560	STAT5_hi_dDHS	Peak_47364	chr4	122635886	122636530	47904	644
chr4	122704001	122704700	STAT5_hi_dDHS	Peak_47377	chr4	122704204	122704503	47921	299
chr4	123266101	123266520	STAT5_hi_dDHS	Peak_47412	.	-1	-1	.	0
chr4	123693721	123694020	STAT5_hi_dDHS	Peak_47439	chr4	123693687	123694138	47978	299
chr4	124307301	124308000	STAT5_hi_dDHS	Peak_47447	chr4	124307608	124307794	47984	186
chr4	125612721	125613220	STAT5_hi_dDHS	Peak_47491	.	-1	-1	.	0
chr4	125850801	125851440	STAT5_hi_dDHS	Peak_47512	chr4	125851029	125851398	48067	369
chr4	129002321	129004160	STAT5_hi_dDHS	Peak_47634	chr4	129003190	129003963	48214	773
chr4	130272161	130273100	STAT5_hi_dDHS	Peak_47711	chr4	130272315	130272955	48315	640
chr4	133270221	133270980	STAT5_hi_dDHS	Peak_47892	chr4	133270616	133270854	48503	238
[truncated: 68,770 more rows]

## Sheet: 5C_MHx vs M
Supplementary File 5C - MHx/Male Control liver DHS overlap with the set of 70,211 DHS. Merged list of 57,053 DHS regions was generated based on the MACS2 peaks called in each DNase-seq replicate sample (see Methods) and assigned a unique name (DHS Peak Number, column E). The genomic position of DHS region is listed in columns A-C, its DHS response in column D, and its overlapping DHS region in th…
DHS Peaks (n = 57,053)					DHS regions (from reference set of 70,211 DHS)				The number of overlapping base pairs between the DHS regions.
Chrom	Start	End	DHS Response	DHS Peak Number	Chr	Start	Stop	DHS Peak Number	bp_overlap
chr1	3406320	3406538	static	Peak_1	chr1	3406266	3406483	1	163
chr1	3467511	3468131	static	Peak_2	chr1	3467754	3468166	4	377
chr1	3504659	3505443	static	Peak_3	chr1	3504628	3505602	5	784
chr1	3541267	3542211	static	Peak_4	.	-1	-1	.	0
chr1	3576272	3576843	static	Peak_5	chr1	3576583	3576809	6	226
chr1	3595576	3596186	static	Peak_6	chr1	3595745	3596010	7	265
chr1	4416981	4417300	dDHS_open	Peak_7	chr1	4416880	4417251	8	270
chr1	4504081	4504300	dDHS_close	Peak_8	chr1	4504003	4504564	11	219
chr1	4504321	4504620	dDHS_close	Peak_9	chr1	4504003	4504564	11	243
chr1	4560681	4561427	static	Peak_10	.	-1	-1	.	0
chr1	4561506	4561922	static	Peak_11	chr1	4561654	4562157	12	268
chr1	4588590	4588983	static	Peak_12	.	-1	-1	.	0
chr1	4607424	4608057	static	Peak_13	chr1	4607607	4607907	13	300
chr1	4644132	4644445	static	Peak_14	chr1	4644079	4644493	14	313
chr1	4651596	4652332	static	Peak_15	chr1	4651774	4652240	15	466
chr1	4660736	4662153	static	Peak_16	chr1	4661316	4662219	17	837
chr1	4736829	4737036	static	Peak_17	chr1	4736913	4737219	18	123
chr1	4758568	4759630	static	Peak_18	chr1	4758414	4759705	19	1062
chr1	4774192	4774646	static	Peak_19	chr1	4774222	4774754	22	424
chr1	4775264	4776218	static	Peak_20	chr1	4775405	4776273	23	813
chr1	4791620	4792484	static	Peak_21	chr1	4791594	4792418	24	798
chr1	4797504	4798363	static	Peak_22	chr1	4797439	4798383	25	859
chr1	4800436	4801000	static	Peak_23	chr1	4800413	4800947	27	511
chr1	4819294	4819867	static	Peak_24	chr1	4819359	4819687	28	328
chr1	4847335	4848427	static	Peak_25	chr1	4847417	4848573	29	1010
chr1	4867874	4868081	static	Peak_26	.	-1	-1	.	0
chr1	5072829	5073722	static	Peak_27	chr1	5072936	5073700	31	764
chr1	5123065	5123290	static	Peak_28	.	-1	-1	.	0
chr1	5124152	5124713	static	Peak_29	chr1	5124248	5124548	32	300
chr1	5248070	5248547	static	Peak_30	.	-1	-1	.	0
chr1	5264721	5265420	dDHS_close	Peak_31	.	-1	-1	.	0
chr1	5301703	5302268	static	Peak_32	chr1	5301758	5302078	33	320
chr1	6204159	6205324	static	Peak_33	chr1	6203854	6205645	34	1165
chr1	6277401	6277601	static	Peak_34	.	-1	-1	.	0
chr1	6344281	6344481	static	Peak_35	.	-1	-1	.	0
chr1	6500087	6501490	static	Peak_36	chr1	6500620	6500920	36	300
chr1	6986021	6986520	dDHS_close	Peak_37	chr1	6986138	6986326	37	188
chr1	7000370	7000583	static	Peak_38	.	-1	-1	.	0
chr1	7078558	7079756	static	Peak_39	.	-1	-1	.	0
chr1	7079837	7080075	static	Peak_40	.	-1	-1	.	0
chr1	7110076	7110422	static	Peak_41	.	-1	-1	.	0
chr1	7111258	7112219	static	Peak_42	.	-1	-1	.	0
chr1	7194850	7195103	static	Peak_43	.	-1	-1	.	0
chr1	7196495	7196772	static	Peak_44	chr1	7196426	7196844	39	277
chr1	7387450	7388500	static	Peak_45	chr1	7387004	7388684	40	1050
chr1	7538150	7538559	static	Peak_46	.	-1	-1	.	0
chr1	7540934	7541228	static	Peak_47	.	-1	-1	.	0
chr1	7737445	7737890	static	Peak_48	.	-1	-1	.	0
chr1	8044761	8045200	dDHS_close	Peak_49	chr1	8044741	8045168	41	407
chr1	8218859	8219230	static	Peak_50	.	-1	-1	.	0
chr1	8407121	8407644	static	Peak_51	.	-1	-1	.	0
chr1	8422229	8422471	static	Peak_52	.	-1	-1	.	0
chr1	8464179	8464446	static	Peak_53	.	-1	-1	.	0
chr1	8631754	8632079	static	Peak_54	chr1	8631782	8632128	43	297
chr1	8811991	8812241	static	Peak_55	.	-1	-1	.	0
chr1	8862687	8863501	static	Peak_56	chr1	8862805	8863267	44	462
chr1	8900975	8901307	static	Peak_57	.	-1	-1	.	0
chr1	9535184	9535817	static	Peak_58	chr1	9534966	9536379	45	633
chr1	9537901	9538100	dDHS_close	Peak_59	chr1	9537821	9539305	47	199
chr1	9538906	9539172	static	Peak_60	chr1	9537821	9539305	47	266
chr1	9549864	9550286	static	Peak_61	chr1	9550146	9550345	51	140
chr1	9554072	9554870	static	Peak_62	chr1	9553797	9554443	52	371
chr1	9555013	9555215	static	Peak_63	.	-1	-1	.	0
chr1	9555216	9555537	static	Peak_64	chr1	9555226	9555552	54	311
chr1	9574476	9575297	static	Peak_65	chr1	9574750	9575210	56	460
chr1	9611501	9612155	static	Peak_66	chr1	9611385	9612309	57	654
chr1	9620383	9620773	static	Peak_67	.	-1	-1	.	0
chr1	9621368	9622025	static	Peak_68	.	-1	-1	.	0
chr1	9628677	9629383	static	Peak_69	chr1	9628731	9629371	60	640
chr1	9690721	9690920	dDHS_open	Peak_70	chr1	9689696	9691271	62	199
chr1	9721333	9721688	static	Peak_71	.	-1	-1	.	0
chr1	9737715	9737927	static	Peak_72	chr1	9737357	9738977	65	212
chr1	9738121	9738360	dDHS_open	Peak_73	chr1	9737357	9738977	65	239
chr1	9762679	9763349	static	Peak_74	.	-1	-1	.	0
chr1	9787677	9788430	static	Peak_75	chr1	9787900	9788797	66	530
chr1	9788537	9788909	static	Peak_76	chr1	9787900	9788797	66	260
chr1	9805233	9805555	static	Peak_77	.	-1	-1	.	0
chr1	9813157	9813357	static	Peak_78	.	-1	-1	.	0
chr1	9840307	9840639	static	Peak_79	chr1	9840384	9840564	68	180
chr1	9866944	9867255	static	Peak_80	.	-1	-1	.	0
chr1	9897110	9897484	static	Peak_81	chr1	9897056	9897421	69	311
chr1	9914984	9915562	static	Peak_82	chr1	9915129	9915283	71	154
chr1	9921721	9922200	dDHS_close	Peak_83	chr1	9921976	9922233	72	224
chr1	9933794	9934562	static	Peak_84	chr1	9933781	9934418	74	624
chr1	9937641	9938140	dDHS_close	Peak_85	chr1	9937477	9938082	76	441
chr1	9957057	9957289	static	Peak_86	chr1	9957087	9957591	77	202
chr1	9957861	9958240	dDHS_open	Peak_87	chr1	9957839	9958299	78	379
chr1	9971735	9972245	static	Peak_88	chr1	9971812	9972092	80	280
chr1	9979021	9979600	dDHS_close	Peak_89	chr1	9978661	9979421	81	400
chr1	10027894	10028366	static	Peak_90	chr1	10027519	10028561	83	472
chr1	10028408	10028615	static	Peak_91	chr1	10027519	10028561	83	153
chr1	10029630	10030493	static	Peak_92	chr1	10029511	10030531	84	863
chr1	10079643	10079843	static	Peak_93	chr1	10079725	10079935	85	118
chr1	10089582	10090115	static	Peak_94	.	-1	-1	.	0
chr1	10132826	10133345	static	Peak_95	chr1	10132909	10133326	86	417
chr1	10146123	10146470	static	Peak_96	.	-1	-1	.	0
chr1	10202310	10202611	static	Peak_97	chr1	10202146	10202514	88	204
chr1	10222583	10223597	static	Peak_98	chr1	10222120	10223601	89	1014
chr1	10310350	10310635	static	Peak_99	.	-1	-1	.	0
chr1	10594201	10594740	dDHS_close	Peak_100	chr1	10594304	10594480	90	176
chr1	10980919	10981327	static	Peak_101	chr1	10980815	10981309	92	390
chr1	10983163	10983863	static	Peak_102	chr1	10983119	10984109	93	700
chr1	11037237	11037437	static	Peak_103	chr1	11037154	11037374	96	137
chr1	11648039	11648246	static	Peak_104	.	-1	-1	.	0
chr1	12275698	12276051	static	Peak_105	.	-1	-1	.	0
chr1	12708581	12708980	dDHS_open	Peak_106	chr1	12708240	12708883	98	302
chr1	13042179	13042548	static	Peak_107	.	-1	-1	.	0
chr1	13105681	13105920	dDHS_close	Peak_108	chr1	13105724	13105984	99	196
chr1	13115971	13116385	static	Peak_109	.	-1	-1	.	0
chr1	13161244	13161623	static	Peak_110	chr1	13161281	13161510	101	229
chr1	13193821	13194100	dDHS_close	Peak_111	chr1	13193360	13194083	102	262
chr1	13194705	13195113	static	Peak_112	chr1	13194711	13194987	103	276
chr1	13231391	13231976	static	Peak_113	chr1	13231439	13231785	104	346
chr1	13257742	13257942	static	Peak_114	.	-1	-1	.	0
chr1	13258056	13258396	static	Peak_115	.	-1	-1	.	0
chr1	13291542	13291746	static	Peak_116	chr1	13291615	13292087	107	131
chr1	13333253	13333591	static	Peak_117	chr1	13333170	13333341	112	88
chr1	13362249	13363363	static	Peak_118	.	-1	-1	.	0
chr1	13364045	13364728	static	Peak_119	.	-1	-1	.	0
chr1	13416259	13417120	static	Peak_120	chr1	13416474	13417271	114	646
chr1	13427808	13428339	static	Peak_121	chr1	13427808	13428051	115	243
chr1	13436868	13437404	static	Peak_122	.	-1	-1	.	0
chr1	13457121	13457520	dDHS_close	Peak_123	chr1	13456977	13457583	117	399
chr1	13477890	13478526	static	Peak_124	chr1	13477835	13478575	118	636
chr1	13480024	13480233	static	Peak_125	.	-1	-1	.	0
chr1	13520950	13521164	static	Peak_126	.	-1	-1	.	0
chr1	13521467	13522161	static	Peak_127	.	-1	-1	.	0
chr1	13551459	13552204	static	Peak_128	chr1	13551578	13552036	120	458
chr1	13564891	13565447	static	Peak_129	chr1	13564871	13565403	121	512
chr1	13566532	13566996	static	Peak_130	chr1	13566547	13567111	123	449
chr1	13579079	13580329	static	Peak_131	chr1	13579082	13580391	124	1247
chr1	13613555	13613755	static	Peak_132	.	-1	-1	.	0
chr1	13618480	13618939	static	Peak_133	chr1	13618387	13618676	125	196
chr1	13629421	13629871	static	Peak_134	chr1	13629663	13629916	128	208
chr1	13636548	13637148	static	Peak_135	chr1	13636607	13636794	129	187
chr1	13646261	13646619	static	Peak_136	chr1	13646247	13646653	130	358
chr1	13648303	13648520	static	Peak_137	chr1	13648197	13648467	131	164
chr1	13649900	13651054	static	Peak_138	chr1	13649975	13651025	134	1050
chr1	13658641	13659240	dDHS_close	Peak_139	chr1	13658706	13658980	135	274
chr1	13667541	13668182	static	Peak_140	chr1	13667694	13668289	137	488
chr1	13668508	13669084	static	Peak_141	chr1	13668645	13668794	138	149
chr1	13689399	13690220	static	Peak_142	chr1	13689727	13690098	141	371
chr1	13696375	13696768	static	Peak_143	.	-1	-1	.	0
chr1	13705910	13706346	static	Peak_144	.	-1	-1	.	0
chr1	13797591	13798182	static	Peak_145	chr1	13797774	13798111	142	337
chr1	14723296	14723556	static	Peak_146	.	-1	-1	.	0
chr1	14785169	14785721	static	Peak_147	chr1	14785165	14785518	143	349
chr1	14997831	14998224	static	Peak_148	.	-1	-1	.	0
chr1	15108671	15109001	static	Peak_149	.	-1	-1	.	0
chr1	15169828	15170221	static	Peak_150	.	-1	-1	.	0
chr1	15203615	15204091	static	Peak_151	.	-1	-1	.	0
chr1	15598177	15598745	static	Peak_152	chr1	15598335	15598956	144	410
chr1	15600736	15601006	static	Peak_153	chr1	15600641	15601088	147	270
chr1	15605618	15606214	static	Peak_154	chr1	15605727	15605971	148	244
chr1	15611898	15612301	static	Peak_155	.	-1	-1	.	0
chr1	15781879	15782091	static	Peak_156	.	-1	-1	.	0
chr1	15795360	15796809	static	Peak_157	chr1	15795316	15796771	149	1411
chr1	15807056	15807571	static	Peak_158	chr1	15806998	15807375	150	319
chr1	15823681	15824000	dDHS_close	Peak_159	chr1	15823330	15823946	151	265
chr1	15867157	15867659	static	Peak_160	chr1	15867197	15867560	152	363
chr1	15892510	15892774	static	Peak_161	.	-1	-1	.	0
chr1	15986982	15987738	static	Peak_162	chr1	15986937	15987673	154	691
chr1	16094178	16095730	static	Peak_163	.	-1	-1	.	0
chr1	16101934	16102199	static	Peak_164	chr1	16101882	16102240	157	265
chr1	16162020	16162461	static	Peak_165	chr1	16162046	16162360	158	314
chr1	16162514	16162824	static	Peak_166	chr1	16162614	16162864	159	210
chr1	16189323	16189953	static	Peak_167	chr1	16189260	16189759	161	436
chr1	16218158	16218961	static	Peak_168	chr1	16218027	16218779	162	621
chr1	16261751	16262436	static	Peak_169	.	-1	-1	.	0
chr1	16299184	16299522	static	Peak_170	.	-1	-1	.	0
chr1	16299974	16300411	static	Peak_171	chr1	16300098	16300404	163	306
chr1	16508983	16509549	static	Peak_172	chr1	16509099	16509477	164	378
chr1	16509747	16510274	static	Peak_173	chr1	16509963	16510173	165	210
chr1	16560944	16561297	static	Peak_174	.	-1	-1	.	0
chr1	16609000	16609845	static	Peak_175	chr1	16608656	16609818	166	818
chr1	16646613	16647716	static	Peak_176	chr1	16646523	16647735	167	1103
chr1	16655110	16656043	static	Peak_177	chr1	16655091	16655819	168	709
chr1	16674101	16674301	static	Peak_178	.	-1	-1	.	0
chr1	16678307	16679222	static	Peak_179	chr1	16678382	16678866	169	484
chr1	17087720	17088237	static	Peak_180	.	-1	-1	.	0
chr1	17153689	17153889	static	Peak_181	.	-1	-1	.	0
chr1	20048307	20048897	static	Peak_182	chr1	20048327	20048793	172	466
chr1	20059807	20060374	static	Peak_183	chr1	20059807	20060228	173	421
chr1	20122029	20122722	static	Peak_184	chr1	20121978	20122698	174	669
chr1	20467672	20468005	static	Peak_185	.	-1	-1	.	0
chr1	20471889	20472414	static	Peak_186	chr1	20471898	20472304	176	406
chr1	20602916	20603139	static	Peak_187	.	-1	-1	.	0
chr1	20607793	20608650	static	Peak_188	chr1	20608004	20608298	177	294
chr1	20643692	20644574	static	Peak_189	chr1	20643817	20644497	178	680
chr1	20748786	20749433	static	Peak_190	.	-1	-1	.	0
chr1	20810223	20810901	static	Peak_191	chr1	20809974	20810831	179	608
chr1	20929242	20929686	static	Peak_192	chr1	20929200	20929359	182	117
chr1	20941190	20942007	static	Peak_193	chr1	20941292	20942155	183	715
chr1	21021601	21022031	static	Peak_194	chr1	21021834	21022055	186	197
chr1	21049306	21050111	static	Peak_195	chr1	21049167	21050218	189	805
chr1	21060024	21060467	static	Peak_196	chr1	21059881	21060527	191	443
chr1	21069170	21070049	static	Peak_197	chr1	21068449	21070013	192	843
chr1	21070423	21070891	static	Peak_198	chr1	21070402	21070895	193	468
chr1	21088427	21088852	static	Peak_199	chr1	21088433	21088834	194	401
chr1	21091094	21091777	static	Peak_200	chr1	21090936	21091753	195	659
chr1	21092721	21093478	static	Peak_201	chr1	21092729	21093192	196	463
chr1	21114907	21115628	static	Peak_202	chr1	21114931	21115521	197	590
chr1	21122341	21122860	dDHS_close	Peak_203	chr1	21122401	21122853	198	452
chr1	21151763	21152411	static	Peak_204	chr1	21151963	21152142	199	179
chr1	21156291	21156816	static	Peak_205	chr1	21156229	21156748	200	457
chr1	21208336	21209186	static	Peak_206	chr1	21208515	21209167	201	652
chr1	21218856	21219323	static	Peak_207	chr1	21218856	21219674	205	467
chr1	21221841	21222420	dDHS_open	Peak_208	chr1	21221797	21223110	207	579
chr1	21230164	21230859	static	Peak_209	chr1	21230070	21230960	208	695
chr1	21236307	21236702	static	Peak_210	chr1	21236203	21236575	214	268
chr1	21242969	21243598	static	Peak_211	chr1	21242798	21243392	217	423
chr1	21261461	21261819	static	Peak_212	chr1	21261450	21261828	226	358
chr1	21294306	21295249	static	Peak_213	chr1	21294301	21295099	228	793
chr1	21295736	21295971	static	Peak_214	.	-1	-1	.	0
chr1	21310301	21310820	dDHS_close	Peak_215	chr1	21310378	21310647	229	269
chr1	21314121	21314700	dDHS_close	Peak_216	chr1	21314112	21314758	230	579
chr1	21316941	21317280	dDHS_close	Peak_217	chr1	21316764	21317254	231	313
chr1	21323743	21324180	static	Peak_218	chr1	21323775	21324106	233	331
chr1	21334392	21334649	static	Peak_219	chr1	21334408	21334676	234	241
chr1	21820011	21820331	static	Peak_220	chr1	21820131	21820288	235	157
chr1	22106601	22107060	dDHS_close	Peak_221	chr1	22106538	22107596	236	459
chr1	22125679	22126416	static	Peak_222	.	-1	-1	.	0
chr1	22601911	22602156	static	Peak_223	chr1	22601751	22602035	239	124
chr1	22627665	22628110	static	Peak_224	chr1	22627701	22628044	240	343
chr1	22640775	22641334	static	Peak_225	chr1	22640824	22640965	241	141
chr1	22917741	22918340	dDHS_close	Peak_226	.	-1	-1	.	0
chr1	23003302	23003941	static	Peak_227	chr1	23003482	23003908	243	426
chr1	23152720	23153753	static	Peak_228	chr1	23153388	23153694	244	306
chr1	23169973	23171017	static	Peak_229	chr1	23170261	23171144	246	756
chr1	23189501	23189914	static	Peak_230	chr1	23189476	23189670	247	169
chr1	23194343	23195319	static	Peak_231	chr1	23194340	23195070	248	727
chr1	23209554	23209885	static	Peak_232	.	-1	-1	.	0
chr1	23244221	23244560	dDHS_close	Peak_233	.	-1	-1	.	0
chr1	23244800	23245374	static	Peak_234	chr1	23244986	23245424	250	388
chr1	23261029	23261663	static	Peak_235	chr1	23260912	23261491	251	462
chr1	23262690	23263907	static	Peak_236	chr1	23262658	23264219	252	1217
chr1	23272525	23273103	static	Peak_237	chr1	23272451	23272689	253	164
chr1	23293752	23293952	static	Peak_238	chr1	23293672	23293793	255	41
chr1	23297633	23297973	static	Peak_239	.	-1	-1	.	0
chr1	23321661	23322000	dDHS_close	Peak_240	chr1	23321642	23321810	256	149
chr1	23327561	23327940	dDHS_close	Peak_241	chr1	23327479	23328729	257	379
chr1	23328401	23328780	dDHS_close	Peak_242	chr1	23327479	23328729	257	328
chr1	23389695	23390568	static	Peak_243	chr1	23389440	23390803	258	873
chr1	23418634	23418834	static	Peak_244	chr1	23418424	23418774	259	140
chr1	23487601	23488320	dDHS_close	Peak_245	chr1	23487714	23488167	260	453
chr1	23491281	23492100	dDHS_close	Peak_246	chr1	23491439	23491893	261	454
chr1	23502331	23502563	static	Peak_247	.	-1	-1	.	0
chr1	23651963	23652226	static	Peak_248	.	-1	-1	.	0
chr1	23711794	23712686	static	Peak_249	.	-1	-1	.	0
chr1	23834200	23834421	static	Peak_250	.	-1	-1	.	0
chr1	23909005	23909209	static	Peak_251	.	-1	-1	.	0
chr1	23928505	23929609	static	Peak_252	chr1	23928483	23929489	263	984
chr1	24011957	24012735	static	Peak_253	chr1	24012004	24012798	264	731
chr1	24106725	24107637	static	Peak_254	chr1	24106418	24108075	265	912
chr1	24114701	24115220	dDHS_close	Peak_255	chr1	24114225	24115555	266	519
chr1	24141619	24141907	static	Peak_256	.	-1	-1	.	0
chr1	24144108	24144488	static	Peak_257	.	-1	-1	.	0
chr1	24684800	24685885	static	Peak_258	chr1	24685030	24686280	268	855
chr1	24740966	24741166	static	Peak_259	chr1	24740882	24741178	269	200
chr1	24750293	24750557	static	Peak_260	.	-1	-1	.	0
chr1	24757155	24757698	static	Peak_261	chr1	24757161	24757548	271	387
chr1	24799998	24800663	static	Peak_262	chr1	24800165	24800395	272	230
chr1	26742861	26743300	dDHS_open	Peak_263	.	-1	-1	.	0
chr1	27288995	27289195	static	Peak_264	.	-1	-1	.	0
chr1	27872445	27872645	static	Peak_265	.	-1	-1	.	0
chr1	27940228	27942093	static	Peak_266	chr1	27940485	27941017	274	532
chr1	30641650	30641915	static	Peak_267	.	-1	-1	.	0
chr1	30835635	30835835	static	Peak_268	.	-1	-1	.	0
chr1	30840276	30840940	static	Peak_269	.	-1	-1	.	0
chr1	30858497	30859278	static	Peak_270	chr1	30858513	30859126	277	613
chr1	30867244	30867838	static	Peak_271	chr1	30867489	30867765	278	276
chr1	30929804	30930007	static	Peak_272	chr1	30929659	30931230	279	203
chr1	30930068	30931225	static	Peak_273	chr1	30929659	30931230	279	1157
chr1	30931358	30931865	static	Peak_274	chr1	30931407	30931672	280	265
chr1	30994000	30994925	static	Peak_275	chr1	30994294	30994845	282	551
chr1	30996563	30997120	static	Peak_276	.	-1	-1	.	0
chr1	30997267	30997668	static	Peak_277	.	-1	-1	.	0
chr1	31006531	31007625	static	Peak_278	chr1	31005794	31007662	285	1094
chr1	31013793	31014087	static	Peak_279	.	-1	-1	.	0
chr1	31048661	31049260	dDHS_close	Peak_280	chr1	31048742	31049203	286	461
chr1	31051051	31051325	static	Peak_281	chr1	31051054	31051274	287	220
chr1	31072889	31073357	static	Peak_282	chr1	31072654	31073353	289	464
chr1	31074481	31074880	dDHS_close	Peak_283	chr1	31074144	31074738	290	257
chr1	31076032	31076695	static	Peak_284	chr1	31076037	31076875	291	658
chr1	31090641	31091260	dDHS_close	Peak_285	chr1	31090628	31091252	292	611
chr1	31103096	31103635	static	Peak_286	.	-1	-1	.	0
chr1	31106641	31107100	dDHS_open	Peak_287	.	-1	-1	.	0
chr1	31107134	31107414	static	Peak_288	chr1	31107208	31107480	294	206
chr1	31129645	31130443	static	Peak_289	chr1	31129432	31130358	295	713
chr1	31150683	31152228	static	Peak_290	chr1	31150634	31152167	296	1484
chr1	31152241	31153300	dDHS_open	Peak_291	chr1	31152609	31153695	298	691
chr1	31170201	31170640	dDHS_open	Peak_292	.	-1	-1	.	0
chr1	31210601	31210960	dDHS_close	Peak_293	chr1	31210752	31211185	300	208
chr1	31267155	31267458	static	Peak_294	.	-1	-1	.	0
chr1	31850299	31850519	static	Peak_295	.	-1	-1	.	0
chr1	31850805	31851314	static	Peak_296	.	-1	-1	.	0
chr1	33099029	33099525	static	Peak_297	chr1	33099148	33099563	301	377
chr1	33131439	33131827	static	Peak_298	.	-1	-1	.	0
chr1	33153781	33154060	dDHS_close	Peak_299	chr1	33153760	33154053	302	272
chr1	33155770	33156198	static	Peak_300	.	-1	-1	.	0
chr1	33271161	33271500	dDHS_close	Peak_301	chr1	33270676	33271583	303	339
chr1	33322915	33323263	static	Peak_302	.	-1	-1	.	0
chr1	33335963	33336170	static	Peak_303	.	-1	-1	.	0
chr1	33720107	33720530	static	Peak_304	.	-1	-1	.	0
chr1	33726516	33727185	static	Peak_305	chr1	33726339	33727411	305	669
chr1	33776578	33777318	static	Peak_306	chr1	33776521	33777298	306	720
chr1	33789962	33790162	static	Peak_307	.	-1	-1	.	0
chr1	33790894	33791792	static	Peak_308	chr1	33790844	33791910	307	898
chr1	33796345	33796568	static	Peak_309	chr1	33796162	33796449	308	104
chr1	33811740	33812464	static	Peak_310	chr1	33811859	33812516	310	605
chr1	33871098	33871678	static	Peak_311	chr1	33870808	33871934	312	580
chr1	33876202	33876416	static	Peak_312	chr1	33876125	33876338	313	136
chr1	34177936	34178171	static	Peak_313	chr1	34177948	34178584	317	223
chr1	34179712	34180483	static	Peak_314	chr1	34179762	34180103	318	341
chr1	34221564	34221828	static	Peak_315	.	-1	-1	.	0
chr1	34224090	34224796	static	Peak_316	chr1	34224374	34224812	321	422
chr1	34275301	34275680	static	Peak_317	chr1	34275311	34275518	322	207
chr1	34293250	34293792	static	Peak_318	chr1	34293077	34293645	323	395
chr1	34294281	34294480	dDHS_close	Peak_319	chr1	34294006	34295431	324	199
chr1	34309180	34309553	static	Peak_320	chr1	34308807	34309482	325	302
chr1	34367716	34367991	static	Peak_321	chr1	34367707	34368061	329	275
chr1	34444344	34445178	static	Peak_322	chr1	34444336	34445175	330	831
chr1	34446180	34446605	static	Peak_323	.	-1	-1	.	0
chr1	34491446	34491916	static	Peak_324	chr1	34491473	34492096	333	443
chr1	34496108	34496938	static	Peak_325	chr1	34495883	34497157	334	830
chr1	34516372	34516928	static	Peak_326	chr1	34516366	34516856	336	484
chr1	34899473	34900235	static	Peak_327	chr1	34899309	34900343	341	762
chr1	34906403	34907057	static	Peak_328	chr1	34906591	34907055	342	464
chr1	35816534	35816967	static	Peak_329	.	-1	-1	.	0
chr1	35820691	35821452	static	Peak_330	chr1	35820962	35821410	349	448
chr1	35880516	35880906	static	Peak_331	chr1	35880546	35880949	352	360
chr1	35893177	35893952	static	Peak_332	chr1	35893280	35893878	353	598
chr1	35894231	35894488	static	Peak_333	chr1	35894134	35894328	354	97
chr1	35926378	35926770	static	Peak_334	chr1	35926255	35926886	356	392
chr1	35982861	35983960	dDHS_close	Peak_335	chr1	35982623	35984183	360	1099
chr1	35990321	35990880	dDHS_close	Peak_336	chr1	35990272	35990824	362	503
chr1	36004946	36005429	static	Peak_337	chr1	36004973	36005127	363	154
chr1	36084201	36084450	static	Peak_338	.	-1	-1	.	0
chr1	36087096	36087296	static	Peak_339	chr1	36087249	36087544	364	47
chr1	36087336	36087536	static	Peak_340	chr1	36087249	36087544	364	200
chr1	36111516	36111716	static	Peak_341	.	-1	-1	.	0
chr1	36122933	36123485	static	Peak_342	chr1	36122350	36123804	366	552
chr1	36124560	36125299	static	Peak_343	.	-1	-1	.	0
chr1	36129742	36130659	static	Peak_344	chr1	36129492	36130889	370	917
chr1	36131859	36132740	static	Peak_345	chr1	36131686	36133197	372	881
chr1	36150354	36150938	static	Peak_346	chr1	36150424	36150944	378	514
chr1	36158341	36158620	dDHS_close	Peak_347	chr1	36157940	36158793	381	279
chr1	36164276	36164476	static	Peak_348	.	-1	-1	.	0
chr1	36166776	36167266	static	Peak_349	chr1	36166895	36167185	383	290
chr1	36175072	36175472	static	Peak_350	.	-1	-1	.	0
chr1	36191521	36191723	static	Peak_351	chr1	36191548	36191698	385	150
chr1	36300626	36301432	static	Peak_352	chr1	36300800	36301381	386	581
chr1	36309730	36309971	static	Peak_353	.	-1	-1	.	0
chr1	36311956	36312359	static	Peak_354	chr1	36312003	36312298	387	295
chr1	36321019	36321319	static	Peak_355	chr1	36321051	36321248	388	197
chr1	36330160	36330509	static	Peak_356	chr1	36330128	36330491	391	331
chr1	36360269	36360634	static	Peak_357	chr1	36360258	36360559	392	290
chr1	36364323	36365398	static	Peak_358	chr1	36364277	36365122	393	799
chr1	36373700	36373947	static	Peak_359	chr1	36373694	36373996	395	247
chr1	36382771	36383094	static	Peak_360	.	-1	-1	.	0
chr1	36390237	36390458	static	Peak_361	.	-1	-1	.	0
chr1	36414261	36414580	dDHS_open	Peak_362	chr1	36413911	36414459	397	198
chr1	36425290	36426178	static	Peak_363	chr1	36425705	36426287	399	473
chr1	36427602	36428334	static	Peak_364	chr1	36427832	36428052	400	220
chr1	36501977	36502511	static	Peak_365	chr1	36501803	36502345	401	368
chr1	36522511	36523054	static	Peak_366	chr1	36522546	36523068	402	508
chr1	36526777	36527509	static	Peak_367	chr1	36526669	36527449	403	672
chr1	36527954	36528869	static	Peak_368	chr1	36527943	36528983	404	915
chr1	36533262	36533598	static	Peak_369	chr1	36533346	36533565	405	219
chr1	36558197	36558397	static	Peak_370	chr1	36558198	36558437	406	199
chr1	36568307	36569619	static	Peak_371	chr1	36568277	36569830	407	1312
chr1	36582416	36583028	static	Peak_372	chr1	36582267	36582959	408	543
chr1	36583832	36584188	static	Peak_373	chr1	36583769	36584074	409	242
chr1	36593161	36593480	static	Peak_374	chr1	36592900	36593516	413	319
chr1	36595869	36596630	static	Peak_375	chr1	36596035	36596720	415	595
chr1	36603673	36604441	static	Peak_376	chr1	36603588	36604764	416	768
chr1	36613441	36613820	dDHS_open	Peak_377	chr1	36613356	36614761	418	379
chr1	36628503	36628764	static	Peak_378	chr1	36628468	36628813	421	261
chr1	36661355	36661818	static	Peak_379	chr1	36661317	36661801	424	446
chr1	36747913	36748527	static	Peak_380	chr1	36747949	36748922	427	578
chr1	36748582	36748782	static	Peak_381	chr1	36747949	36748922	427	200
chr1	36766470	36767306	static	Peak_382	chr1	36766382	36767120	429	650
chr1	36794494	36794694	static	Peak_383	.	-1	-1	.	0
chr1	36837443	36838172	static	Peak_384	chr1	36837389	36838162	432	719
chr1	36841599	36841802	static	Peak_385	chr1	36841571	36841914	434	203
chr1	36896827	36897027	static	Peak_386	chr1	36896829	36897021	435	192
chr1	36918659	36919029	static	Peak_387	chr1	36918556	36918980	436	321
chr1	36931829	36932282	static	Peak_388	chr1	36931716	36932079	437	250
chr1	36959532	36959753	static	Peak_389	chr1	36959476	36959673	438	141
chr1	36976935	36977459	static	Peak_390	chr1	36977023	36977285	440	262
chr1	36985681	36985998	static	Peak_391	chr1	36985785	36986078	441	213
chr1	36996323	36997158	static	Peak_392	chr1	36996229	36997090	443	767
chr1	37033458	37034234	static	Peak_393	chr1	37033650	37034126	444	476
chr1	37053469	37053938	static	Peak_394	.	-1	-1	.	0
chr1	37082649	37083508	static	Peak_395	chr1	37082096	37083509	445	859
chr1	37085602	37085980	static	Peak_396	.	-1	-1	.	0
chr1	37097824	37098573	static	Peak_397	chr1	37097920	37098572	447	652
chr1	37114021	37114320	dDHS_open	Peak_398	chr1	37114079	37114497	449	241
chr1	37288320	37288560	static	Peak_399	.	-1	-1	.	0
chr1	37356321	37356540	dDHS_close	Peak_400	chr1	37356367	37357252	450	173
chr1	37398230	37399167	static	Peak_401	chr1	37398147	37399097	452	867
chr1	37404181	37404800	dDHS_close	Peak_402	chr1	37404152	37404680	453	499
chr1	37407861	37408447	static	Peak_403	chr1	37407780	37408500	454	586
chr1	37417678	37418066	static	Peak_404	chr1	37417758	37418075	455	308
chr1	37486476	37487384	static	Peak_405	chr1	37486354	37487403	456	908
chr1	37625281	37625583	static	Peak_406	.	-1	-1	.	0
chr1	37667772	37667986	static	Peak_407	chr1	37667942	37668110	458	44
chr1	37668005	37668241	static	Peak_408	chr1	37667942	37668110	458	105
chr1	37735307	37735507	static	Peak_409	.	-1	-1	.	0
chr1	37921582	37922514	static	Peak_410	chr1	37921350	37922570	460	932
chr1	37928675	37929616	static	Peak_411	chr1	37928592	37929556	461	881
chr1	37934658	37935327	static	Peak_412	chr1	37934620	37935276	462	618
chr1	37946776	37947698	static	Peak_413	chr1	37946871	37947587	463	716
chr1	38053693	38055106	static	Peak_414	chr1	38053589	38055554	464	1413
chr1	38087937	38088668	static	Peak_415	.	-1	-1	.	0
chr1	38138039	38138286	static	Peak_416	.	-1	-1	.	0
chr1	38166933	38167177	static	Peak_417	.	-1	-1	.	0
chr1	38175529	38175976	static	Peak_418	chr1	38175581	38175719	467	138
chr1	38181176	38181434	static	Peak_419	chr1	38181205	38181419	468	214
chr1	38186001	38186380	dDHS_open	Peak_420	chr1	38185747	38187236	469	379
chr1	38242500	38242883	static	Peak_421	chr1	38242435	38242644	471	144
chr1	38298317	38299805	static	Peak_422	.	-1	-1	.	0
chr1	38364906	38365918	static	Peak_423	chr1	38364786	38365885	474	979
chr1	38414933	38415436	static	Peak_424	.	-1	-1	.	0
chr1	38506161	38506760	dDHS_close	Peak_425	chr1	38506302	38506656	475	354
chr1	38918424	38918962	static	Peak_426	chr1	38918571	38918821	477	250
chr1	38921312	38921772	static	Peak_427	.	-1	-1	.	0
chr1	39044094	39044976	static	Peak_428	chr1	39043923	39045007	478	882
chr1	39067664	39068073	static	Peak_429	chr1	39067622	39067820	479	156
chr1	39082048	39082536	static	Peak_430	chr1	39082113	39082285	480	172
chr1	39125061	39125380	dDHS_close	Peak_431	chr1	39124529	39125132	481	71
chr1	39159421	39159680	dDHS_close	Peak_432	chr1	39159355	39159735	482	259
chr1	39162399	39162918	static	Peak_433	chr1	39162427	39162878	483	451
chr1	39189699	39190387	static	Peak_434	chr1	39189974	39190127	484	153
chr1	39200305	39201028	static	Peak_435	chr1	39200532	39200825	485	293
chr1	39213612	39213846	static	Peak_436	chr1	39213626	39213916	486	220
chr1	39243707	39244324	static	Peak_437	.	-1	-1	.	0
chr1	39249501	39249920	dDHS_close	Peak_438	chr1	39249163	39250112	488	419
chr1	39261956	39262309	static	Peak_439	.	-1	-1	.	0
chr1	39341595	39341975	static	Peak_440	chr1	39341656	39341937	489	281
chr1	39342602	39342802	static	Peak_441	.	-1	-1	.	0
chr1	39345241	39345682	static	Peak_442	chr1	39345350	39345603	490	253
chr1	39359150	39359528	static	Peak_443	chr1	39359195	39359468	491	273
chr1	39370282	39370556	static	Peak_444	chr1	39370275	39370450	492	168
chr1	39374474	39375297	static	Peak_445	chr1	39374827	39375106	493	279
chr1	39381880	39382615	static	Peak_446	chr1	39382221	39382378	494	157
chr1	39424292	39425079	static	Peak_447	chr1	39424412	39425398	495	667
chr1	39449022	39449528	static	Peak_448	chr1	39449168	39449293	496	125
chr1	39482125	39482774	static	Peak_449	chr1	39482281	39482891	498	493
chr1	39490921	39491380	dDHS_close	Peak_450	chr1	39491214	39491664	500	166
chr1	39502357	39503001	static	Peak_451	chr1	39502636	39502954	501	318
chr1	39509001	39509620	dDHS_open	Peak_452	chr1	39509123	39509408	502	285
chr1	39514911	39515681	static	Peak_453	chr1	39514904	39515666	503	755
chr1	39534976	39536085	static	Peak_454	chr1	39534848	39535965	504	989
chr1	39561131	39561362	static	Peak_455	.	-1	-1	.	0
chr1	39572130	39572674	static	Peak_456	chr1	39572234	39572706	505	440
chr1	39584401	39584774	static	Peak_457	chr1	39584320	39584617	507	216
chr1	39592228	39593046	static	Peak_458	chr1	39592148	39593124	509	818
chr1	39594096	39594666	static	Peak_459	chr1	39594348	39594800	510	318
chr1	39633798	39634801	static	Peak_460	chr1	39633348	39634687	511	889
chr1	39635523	39635723	static	Peak_461	chr1	39635315	39635615	512	92
chr1	39648516	39649472	static	Peak_462	chr1	39648480	39649399	513	883
chr1	39655494	39655921	static	Peak_463	chr1	39655634	39655927	514	287
chr1	39665143	39666099	static	Peak_464	chr1	39665130	39665662	515	519
chr1	39671809	39672009	static	Peak_465	.	-1	-1	.	0
chr1	39770541	39771180	dDHS_open	Peak_466	chr1	39770647	39771511	519	533
chr1	39792609	39793353	static	Peak_467	chr1	39792737	39793398	521	616
chr1	39818378	39819216	static	Peak_468	chr1	39818828	39819184	523	356
chr1	39819353	39819553	static	Peak_469	.	-1	-1	.	0
chr1	39869976	39870367	static	Peak_470	chr1	39869985	39870285	524	300
chr1	39925722	39926622	static	Peak_471	chr1	39925797	39926985	525	825
chr1	39926669	39927152	static	Peak_472	chr1	39925797	39926985	525	316
chr1	39927211	39927623	static	Peak_473	.	-1	-1	.	0
chr1	39945887	39946123	static	Peak_474	.	-1	-1	.	0
chr1	39959614	39960201	static	Peak_475	chr1	39959567	39960194	527	580
chr1	39968510	39968712	static	Peak_476	chr1	39968395	39968533	528	23
chr1	39993117	39993641	static	Peak_477	chr1	39993176	39993677	529	465
chr1	40006552	40006921	static	Peak_478	.	-1	-1	.	0
chr1	40142480	40142834	static	Peak_479	chr1	40142587	40142797	533	210
chr1	40158509	40158709	static	Peak_480	.	-1	-1	.	0
chr1	40171968	40172198	static	Peak_481	.	-1	-1	.	0
chr1	40172253	40172671	static	Peak_482	chr1	40172245	40172547	534	294
chr1	40173278	40173507	static	Peak_483	chr1	40173320	40173585	535	187
chr1	40174479	40174819	static	Peak_484	chr1	40174499	40174994	536	320
chr1	40181350	40181550	static	Peak_485	.	-1	-1	.	0
chr1	40189654	40189931	static	Peak_486	chr1	40189619	40189913	537	259
chr1	40212781	40213380	dDHS_close	Peak_487	chr1	40212622	40213696	540	599
chr1	40213992	40214251	static	Peak_488	.	-1	-1	.	0
chr1	40220161	40220820	dDHS_close	Peak_489	chr1	40219922	40220754	542	593
chr1	40220941	40221220	dDHS_close	Peak_490	chr1	40220879	40221705	543	279
chr1	40228701	40229500	dDHS_close	Peak_491	chr1	40228680	40229412	545	711
chr1	40231035	40231374	static	Peak_492	.	-1	-1	.	0
chr1	40231901	40232420	dDHS_close	Peak_493	chr1	40231732	40233173	546	519
chr1	40232601	40233160	dDHS_close	Peak_494	chr1	40231732	40233173	546	559
chr1	40236288	40236515	static	Peak_495	chr1	40236332	40236959	547	183
chr1	40237868	40238068	static	Peak_496	chr1	40237781	40238014	548	146
chr1	40244681	40245200	dDHS_close	Peak_497	chr1	40244687	40245231	549	513
chr1	40272926	40273126	static	Peak_498	.	-1	-1	.	0
chr1	40274360	40274868	static	Peak_499	chr1	40274431	40274700	550	269
chr1	40278721	40279060	dDHS_close	Peak_500	chr1	40278763	40279174	553	297
chr1	40281641	40282280	dDHS_close	Peak_501	chr1	40281258	40282274	555	633
chr1	40283941	40285180	dDHS_close	Peak_502	chr1	40284598	40285212	557	582
chr1	40286461	40287140	dDHS_close	Peak_503	chr1	40285950	40287026	558	565
chr1	40293561	40294220	dDHS_close	Peak_504	chr1	40293477	40294208	560	647
chr1	40299481	40300180	dDHS_close	Peak_505	chr1	40299557	40299948	561	391
chr1	40300389	40300739	static	Peak_506	chr1	40300363	40300825	562	350
chr1	40323039	40323508	static	Peak_507	chr1	40322962	40323891	564	469
chr1	40367811	40368771	static	Peak_508	chr1	40368058	40368316	566	258
chr1	40435503	40435864	static	Peak_509	chr1	40435690	40435949	568	174
chr1	40437049	40437411	static	Peak_510	.	-1	-1	.	0
chr1	40847212	40847917	static	Peak_511	chr1	40847204	40847737	570	525
chr1	41256223	41256517	static	Peak_512	.	-1	-1	.	0
chr1	41446984	41447316	static	Peak_513	chr1	41446994	41447313	571	319
chr1	41600425	41601033	static	Peak_514	.	-1	-1	.	0
chr1	41608161	41609100	dDHS_close	Peak_515	chr1	41608251	41608848	572	597
chr1	41612401	41612940	dDHS_close	Peak_516	chr1	41612445	41613149	573	495
chr1	41615901	41616660	dDHS_close	Peak_517	chr1	41615911	41616549	574	638
chr1	41709494	41709955	static	Peak_518	chr1	41709503	41709883	576	380
chr1	41809430	41809688	static	Peak_519	chr1	41809378	41809674	577	244
chr1	42589597	42590159	static	Peak_520	chr1	42589553	42590168	578	562
chr1	42599160	42599481	static	Peak_521	chr1	42598990	42599164	579	4
chr1	42648825	42649100	static	Peak_522	.	-1	-1	.	0
chr1	42756380	42757020	static	Peak_523	.	-1	-1	.	0
chr1	42798421	42798840	dDHS_close	Peak_524	chr1	42798407	42798953	581	419
chr1	42907663	42908606	static	Peak_525	chr1	42907766	42908578	582	812
chr1	43149261	43149847	static	Peak_526	chr1	43148422	43149843	583	582
chr1	43154966	43155910	static	Peak_527	chr1	43154987	43156018	584	923
chr1	43196449	43196727	static	Peak_528	chr1	43196543	43196749	585	184
chr1	43307109	43307527	static	Peak_529	chr1	43307169	43307574	586	358
chr1	43330115	43330645	static	Peak_530	chr1	43330171	43330410	587	239
chr1	43334352	43334590	static	Peak_531	.	-1	-1	.	0
chr1	43361993	43363118	static	Peak_532	chr1	43362118	43362550	589	432
chr1	43394237	43394805	static	Peak_533	chr1	43394115	43394607	591	370
chr1	43456021	43456400	dDHS_close	Peak_534	chr1	43455896	43456118	593	97
chr1	43502101	43502720	dDHS_open	Peak_535	chr1	43501985	43502593	595	492
chr1	43541945	43542546	static	Peak_536	chr1	43542057	43542495	597	438
chr1	43591067	43591593	static	Peak_537	chr1	43591257	43591522	598	265
chr1	43884216	43885157	static	Peak_538	chr1	43883967	43885092	599	876
chr1	43959762	43960122	static	Peak_539	chr1	43959789	43960082	600	293
chr1	43990302	43991230	static	Peak_540	chr1	43990256	43991540	601	928
chr1	44072253	44072973	static	Peak_541	chr1	44072355	44072744	602	389
chr1	44158880	44159632	static	Peak_542	chr1	44158415	44159618	603	738
chr1	44175396	44176918	static	Peak_543	.	-1	-1	.	0
chr1	44186801	44187380	dDHS_close	Peak_544	chr1	44186816	44187311	605	495
chr1	44199692	44199901	static	Peak_545	chr1	44199727	44199992	606	174
chr1	44204413	44205083	static	Peak_546	chr1	44204273	44205207	608	670
chr1	44254957	44255416	static	Peak_547	chr1	44255165	44256001	609	251
chr1	44632262	44632743	static	Peak_548	.	-1	-1	.	0
chr1	44633381	44633869	static	Peak_549	.	-1	-1	.	0
chr1	44835694	44835915	static	Peak_550	.	-1	-1	.	0
chr1	44853681	44854040	dDHS_close	Peak_551	chr1	44853728	44854012	610	284
chr1	44891161	44891640	dDHS_close	Peak_552	chr1	44890953	44891485	611	324
chr1	45073583	45074070	static	Peak_553	.	-1	-1	.	0
chr1	45078933	45079529	static	Peak_554	.	-1	-1	.	0
chr1	45313073	45313530	static	Peak_555	.	-1	-1	.	0
chr1	45370749	45371044	static	Peak_556	.	-1	-1	.	0
chr1	45488758	45489244	static	Peak_557	chr1	45488856	45489146	612	290
chr1	45702228	45702477	static	Peak_558	chr1	45702214	45702488	614	249
chr1	45729701	45730222	static	Peak_559	chr1	45729712	45729912	615	200
chr1	45823003	45823224	static	Peak_560	.	-1	-1	.	0
chr1	45851703	45852767	static	Peak_561	chr1	45851714	45852769	616	1053
chr1	45882109	45882442	static	Peak_562	chr1	45882077	45882276	617	167
chr1	45889427	45889632	static	Peak_563	.	-1	-1	.	0
chr1	45894579	45894998	static	Peak_564	chr1	45894524	45894937	618	358
chr1	45916909	45917694	static	Peak_565	chr1	45917114	45917579	619	465
chr1	45925536	45925832	static	Peak_566	chr1	45925764	45925984	623	68
chr1	45938117	45938589	static	Peak_567	chr1	45938266	45938637	624	323
chr1	45954866	45955277	static	Peak_568	chr1	45954957	45955232	625	275
chr1	45960905	45961375	static	Peak_569	chr1	45960936	45961540	626	439
chr1	45961755	45962576	static	Peak_570	chr1	45961648	45962752	627	821
chr1	45977393	45978118	static	Peak_571	chr1	45977477	45978243	631	641
chr1	45982344	45983004	static	Peak_572	.	-1	-1	.	0
chr1	45992586	45993031	static	Peak_573	.	-1	-1	.	0
chr1	46910136	46911141	static	Peak_574	chr1	46909387	46911372	636	1005
chr1	46965324	46965524	static	Peak_575	.	-1	-1	.	0
chr1	47027445	47027676	static	Peak_576	.	-1	-1	.	0
chr1	47273281	47273720	dDHS_close	Peak_577	.	-1	-1	.	0
chr1	48503031	48503619	static	Peak_578	.	-1	-1	.	0
chr1	48599443	48599643	static	Peak_579	.	-1	-1	.	0
chr1	48622956	48623412	static	Peak_580	.	-1	-1	.	0
chr1	48938283	48938552	static	Peak_581	.	-1	-1	.	0
chr1	49627681	49628280	dDHS_close	Peak_582	chr1	49627788	49628116	637	328
chr1	49629281	49629840	dDHS_close	Peak_583	chr1	49629448	49629745	638	297
chr1	50739579	50740438	static	Peak_584	chr1	50739713	50740448	640	725
chr1	50863288	50863853	static	Peak_585	.	-1	-1	.	0
chr1	50992235	50992663	static	Peak_586	chr1	50992166	50992668	642	428
chr1	51019290	51019520	static	Peak_587	.	-1	-1	.	0
chr1	51321781	51322280	dDHS_open	Peak_588	chr1	51321932	51322547	643	348
chr1	51322761	51323120	dDHS_open	Peak_589	chr1	51322789	51323165	644	331
chr1	51345638	51346205	static	Peak_590	chr1	51345572	51346374	645	567
chr1	51357163	51357591	static	Peak_591	chr1	51357127	51357603	648	428
chr1	51390658	51391054	static	Peak_592	chr1	51390877	51391073	649	177
chr1	51516123	51516323	static	Peak_593	chr1	51515983	51516293	650	170
chr1	51534569	51535831	static	Peak_594	chr1	51534315	51535748	651	1179
chr1	51562501	51562877	static	Peak_595	chr1	51562564	51562802	652	238
chr1	51565920	51566369	static	Peak_596	chr1	51565982	51566315	653	333
chr1	51569101	51569900	dDHS_close	Peak_597	chr1	51569079	51570249	654	799
chr1	51569941	51570240	dDHS_close	Peak_598	chr1	51569079	51570249	654	299
chr1	51653703	51654319	static	Peak_599	chr1	51653930	51654109	657	179
chr1	51776852	51777660	static	Peak_600	chr1	51776861	51777543	659	682
chr1	51782746	51782951	static	Peak_601	.	-1	-1	.	0
chr1	51797741	51798000	dDHS_close	Peak_602	chr1	51797415	51798345	661	259
chr1	51816441	51816900	dDHS_close	Peak_603	chr1	51816445	51817014	662	455
chr1	51826749	51827439	static	Peak_604	chr1	51826539	51827361	664	612
chr1	51872097	51872619	static	Peak_605	chr1	51872182	51872363	666	181
chr1	51878121	51878741	static	Peak_606	chr1	51878433	51878752	667	308
chr1	51879222	51879746	static	Peak_607	chr1	51879313	51879656	668	343
chr1	51904917	51905117	static	Peak_608	.	-1	-1	.	0
chr1	51906252	51906974	static	Peak_609	chr1	51906479	51906970	669	491
chr1	51912557	51913995	static	Peak_610	chr1	51912585	51914119	670	1410
chr1	51935381	51935587	static	Peak_611	.	-1	-1	.	0
chr1	51938177	51938420	static	Peak_612	.	-1	-1	.	0
chr1	51939478	51940478	static	Peak_613	chr1	51939451	51940517	672	1000
chr1	51948877	51949157	static	Peak_614	chr1	51948875	51949633	674	280
chr1	51950937	51951353	static	Peak_615	chr1	51950494	51951373	675	416
chr1	51951628	51951903	static	Peak_616	.	-1	-1	.	0
chr1	51952681	51953380	dDHS_close	Peak_617	chr1	51952712	51953510	676	668
chr1	51961754	51962405	static	Peak_618	.	-1	-1	.	0
chr1	51971032	51971327	static	Peak_619	.	-1	-1	.	0
chr1	51971924	51972133	static	Peak_620	chr1	51971868	51973365	678	209
chr1	51972255	51973047	static	Peak_621	chr1	51971868	51973365	678	792
chr1	51979434	51980021	static	Peak_622	chr1	51979767	51979961	679	194
chr1	52001725	52002248	static	Peak_623	.	-1	-1	.	0
chr1	52053707	52053991	static	Peak_624	chr1	52053636	52053942	680	235
chr1	52097264	52097781	static	Peak_625	.	-1	-1	.	0
chr1	52170267	52171142	static	Peak_626	chr1	52170260	52171007	682	740
chr1	52175832	52176777	static	Peak_627	chr1	52175919	52176872	683	858
chr1	52220401	52220790	static	Peak_628	chr1	52220611	52220863	686	179
chr1	52289828	52290552	static	Peak_629	chr1	52289219	52290642	687	724
chr1	52444167	52444431	static	Peak_630	.	-1	-1	.	0
chr1	52484894	52485296	static	Peak_631	chr1	52484854	52485269	688	375
chr1	52490715	52491142	static	Peak_632	chr1	52490975	52491199	689	167
chr1	52491187	52491732	static	Peak_633	chr1	52490975	52491199	689	12
chr1	52511848	52512096	static	Peak_634	.	-1	-1	.	0
chr1	52513557	52513852	static	Peak_635	.	-1	-1	.	0
chr1	52522881	52523100	dDHS_close	Peak_636	chr1	52522654	52523198	690	219
chr1	52535257	52535542	static	Peak_637	.	-1	-1	.	0
chr1	52552474	52552861	static	Peak_638	chr1	52552435	52552775	693	301
chr1	52556360	52557083	static	Peak_639	chr1	52556387	52557922	694	696
chr1	52557171	52557879	static	Peak_640	chr1	52556387	52557922	694	708
chr1	52558504	52558886	static	Peak_641	chr1	52558596	52558903	695	290
chr1	52654633	52654908	static	Peak_642	.	-1	-1	.	0
chr1	52687196	52688070	static	Peak_643	chr1	52687313	52687784	697	471
chr1	52705107	52705476	static	Peak_644	.	-1	-1	.	0
chr1	52783841	52784224	static	Peak_645	chr1	52783937	52784243	698	287
chr1	52805248	52805476	static	Peak_646	.	-1	-1	.	0
chr1	52806806	52807459	static	Peak_647	chr1	52806829	52807249	699	420
chr1	52822707	52822907	static	Peak_648	chr1	52822666	52822919	700	200
chr1	52861809	52862435	static	Peak_649	chr1	52861878	52862213	702	335
chr1	52873767	52874853	static	Peak_650	chr1	52873566	52874837	703	1070
chr1	52901493	52902282	static	Peak_651	chr1	52901548	52902572	704	734
chr1	52906313	52906869	static	Peak_652	chr1	52906268	52906939	706	556
chr1	53109778	53110221	static	Peak_653	.	-1	-1	.	0
chr1	53116167	53116451	static	Peak_654	chr1	53115626	53116513	707	284
chr1	53117292	53117587	static	Peak_655	chr1	53117257	53117704	708	295
chr1	53127321	53127760	dDHS_close	Peak_656	chr1	53127082	53127886	709	439
chr1	53142098	53142419	static	Peak_657	chr1	53142086	53142418	710	320
chr1	53150101	53150310	static	Peak_658	.	-1	-1	.	0
chr1	53347868	53348655	static	Peak_659	chr1	53348104	53348462	711	358
chr1	53353491	53354485	static	Peak_660	chr1	53353461	53354326	712	835
chr1	53357448	53357727	static	Peak_661	.	-1	-1	.	0
chr1	53369962	53370957	static	Peak_662	chr1	53370098	53370885	713	787
chr1	53409180	53409879	static	Peak_663	chr1	53409191	53409809	714	618
chr1	53841628	53842459	static	Peak_664	chr1	53841142	53842506	715	831
chr1	53880682	53880991	static	Peak_665	.	-1	-1	.	0
chr1	53907965	53908681	static	Peak_666	chr1	53908270	53908511	716	241
chr1	53987895	53988095	static	Peak_667	.	-1	-1	.	0
chr1	54035342	54035553	static	Peak_668	chr1	54035082	54035675	718	211
chr1	54062738	54063275	static	Peak_669	chr1	54062928	54063271	719	343
chr1	54074634	54074983	static	Peak_670	chr1	54074623	54075019	720	349
chr1	54307005	54307895	static	Peak_671	chr1	54307249	54307982	722	646
chr1	54438168	54438449	static	Peak_672	.	-1	-1	.	0
chr1	54495499	54496053	static	Peak_673	chr1	54495551	54496029	723	478
chr1	54580611	54581147	static	Peak_674	chr1	54580653	54580866	724	213
chr1	54599815	54600236	static	Peak_675	chr1	54599838	54600103	725	265
chr1	54602321	54602960	dDHS_close	Peak_676	chr1	54601991	54602889	726	568
chr1	54609478	54609828	static	Peak_677	.	-1	-1	.	0
chr1	54613807	54614036	static	Peak_678	chr1	54613659	54615092	727	229
chr1	54614139	54614984	static	Peak_679	chr1	54613659	54615092	727	845
chr1	54671721	54672300	dDHS_close	Peak_680	chr1	54671523	54672339	728	579
chr1	54722948	54723341	static	Peak_681	.	-1	-1	.	0
chr1	54740950	54741642	static	Peak_682	chr1	54741087	54741894	729	555
chr1	54747424	54748032	static	Peak_683	chr1	54747507	54747803	730	296
chr1	54822565	54822896	static	Peak_684	chr1	54822721	54823139	734	175
chr1	54859802	54860294	static	Peak_685	.	-1	-1	.	0
chr1	54872340	54872652	static	Peak_686	chr1	54872210	54872565	736	225
chr1	54883285	54883894	static	Peak_687	chr1	54882945	54884060	738	609
chr1	54889877	54890099	static	Peak_688	.	-1	-1	.	0
chr1	54894722	54894922	static	Peak_689	chr1	54894620	54895229	740	200
chr1	54896980	54897180	static	Peak_690	chr1	54896854	54897211	741	200
chr1	54916942	54917235	static	Peak_691	chr1	54916848	54917043	744	101
chr1	54982501	54983000	dDHS_open	Peak_692	chr1	54982696	54983540	747	304
chr1	55040205	55040752	static	Peak_693	chr1	55040221	55040775	748	531
chr1	55083450	55084589	static	Peak_694	chr1	55083499	55084645	749	1090
chr1	55109085	55110237	static	Peak_695	chr1	55108941	55110385	751	1152
chr1	55116984	55117337	static	Peak_696	.	-1	-1	.	0
chr1	55132889	55133525	static	Peak_697	.	-1	-1	.	0
chr1	55133745	55134172	static	Peak_698	.	-1	-1	.	0
chr1	55136507	55136986	static	Peak_699	chr1	55136533	55136946	753	413
chr1	55144359	55145519	static	Peak_700	.	-1	-1	.	0
chr1	55149072	55149631	static	Peak_701	.	-1	-1	.	0
chr1	55188301	55188520	dDHS_open	Peak_702	chr1	55187691	55188774	755	219
chr1	55202530	55202761	static	Peak_703	chr1	55202522	55202689	756	159
chr1	55228241	55228820	dDHS_close	Peak_704	chr1	55227831	55229045	757	579
chr1	55230367	55231294	static	Peak_705	chr1	55230206	55231364	758	927
chr1	55293686	55294484	static	Peak_706	chr1	55293784	55294496	759	700
chr1	55296170	55296490	static	Peak_707	.	-1	-1	.	0
chr1	55420105	55420691	static	Peak_708	chr1	55420204	55420761	760	487
chr1	55461072	55461473	static	Peak_709	.	-1	-1	.	0
chr1	55462631	55463172	static	Peak_710	chr1	55462532	55463062	762	431
chr1	55562921	55563224	static	Peak_711	.	-1	-1	.	0
chr1	55742342	55742915	static	Peak_712	.	-1	-1	.	0
chr1	55763539	55764260	static	Peak_713	chr1	55763876	55764255	764	379
chr1	55775307	55775578	static	Peak_714	.	-1	-1	.	0
chr1	55793163	55793576	static	Peak_715	chr1	55793231	55793425	765	194
chr1	55931062	55931396	static	Peak_716	.	-1	-1	.	0
chr1	56596601	56597160	dDHS_close	Peak_717	chr1	56596578	56597327	768	559
chr1	56681016	56681429	static	Peak_718	.	-1	-1	.	0
chr1	56836260	56836558	static	Peak_719	.	-1	-1	.	0
chr1	57029841	57030060	dDHS_open	Peak_720	chr1	57028892	57030834	772	219
chr1	57031101	57031300	dDHS_close	Peak_721	chr1	57031117	57031481	773	183
chr1	57036205	57036419	static	Peak_722	.	-1	-1	.	0
chr1	57326436	57326799	static	Peak_723	chr1	57326514	57326827	774	285
chr1	57396123	57396522	static	Peak_724	chr1	57396280	57396544	775	242
chr1	57398050	57398658	static	Peak_725	chr1	57398092	57398377	776	285
chr1	57422656	57422856	static	Peak_726	.	-1	-1	.	0
chr1	57425263	57425633	static	Peak_727	chr1	57425294	57425549	777	255
chr1	57428186	57428689	static	Peak_728	.	-1	-1	.	0
chr1	57429546	57429797	static	Peak_729	chr1	57429739	57430038	778	58
chr1	57429831	57430103	static	Peak_730	chr1	57429739	57430038	778	207
chr1	57434241	57434967	static	Peak_731	chr1	57434191	57435070	779	726
chr1	57447882	57448664	static	Peak_732	chr1	57447913	57448625	780	712
chr1	57449074	57449697	static	Peak_733	chr1	57449325	57449916	781	372
chr1	57463126	57463999	static	Peak_734	chr1	57462902	57464170	782	873
chr1	57485883	57486104	static	Peak_735	.	-1	-1	.	0
chr1	57493086	57493711	static	Peak_736	chr1	57493003	57493611	784	525
chr1	57546695	57546895	static	Peak_737	.	-1	-1	.	0
chr1	57725520	57726015	static	Peak_738	.	-1	-1	.	0
chr1	57782205	57782406	static	Peak_739	.	-1	-1	.	0
chr1	57906773	57907124	static	Peak_740	chr1	57906853	57907063	788	210
chr1	57947164	57947383	static	Peak_741	chr1	57947148	57947614	789	219
chr1	58026455	58027349	static	Peak_742	chr1	58026752	58027169	790	417
chr1	58052392	58053161	static	Peak_743	chr1	58052546	58053159	791	613
chr1	58086410	58087297	static	Peak_744	.	-1	-1	.	0
chr1	58087347	58088184	static	Peak_745	.	-1	-1	.	0
chr1	58128401	58128600	dDHS_close	Peak_746	chr1	58127850	58129112	794	199
chr1	58128621	58129060	dDHS_close	Peak_747	chr1	58127850	58129112	794	439
chr1	58134861	58135220	dDHS_close	Peak_748	chr1	58134675	58135709	796	359
chr1	58138210	58138568	static	Peak_749	chr1	58138066	58138430	797	220
chr1	58149261	58149880	dDHS_close	Peak_750	chr1	58149359	58149716	798	357
chr1	58154228	58154550	static	Peak_751	chr1	58154239	58154580	799	311
chr1	58158266	58158940	static	Peak_752	chr1	58158302	58158945	800	638
chr1	58169688	58170219	static	Peak_753	chr1	58169758	58170560	801	461
chr1	58170830	58171251	static	Peak_754	chr1	58170836	58171233	802	397
chr1	58171769	58172358	static	Peak_755	chr1	58171725	58172319	803	550
chr1	58174937	58175373	static	Peak_756	chr1	58174849	58175505	804	436
chr1	58183628	58183828	static	Peak_757	.	-1	-1	.	0
chr1	58200991	58201747	static	Peak_758	chr1	58200931	58202136	806	756
chr1	58260080	58260385	static	Peak_759	.	-1	-1	.	0
chr1	58260386	58261358	static	Peak_760	.	-1	-1	.	0
chr1	58353003	58353204	static	Peak_761	chr1	58353202	58353429	815	2
chr1	58398374	58398783	static	Peak_762	chr1	58398519	58398761	816	242
chr1	58410176	58410986	static	Peak_763	chr1	58410298	58410860	817	562
chr1	58439058	58439299	static	Peak_764	.	-1	-1	.	0
chr1	58439433	58439978	static	Peak_765	chr1	58439469	58439858	818	389
chr1	58448833	58449041	static	Peak_766	chr1	58448793	58448901	819	68
chr1	58449488	58450340	static	Peak_767	chr1	58449436	58450393	820	852
chr1	58458303	58458694	static	Peak_768	chr1	58458290	58458596	822	293
chr1	58479818	58481237	static	Peak_769	chr1	58480310	58481217	824	907
chr1	58501912	58502706	static	Peak_770	chr1	58501963	58502670	826	707
chr1	58561512	58562313	static	Peak_771	chr1	58561435	58562085	828	573
chr1	58643020	58643709	static	Peak_772	chr1	58642642	58643603	830	583
chr1	58653907	58654415	static	Peak_773	.	-1	-1	.	0
chr1	58661490	58662034	static	Peak_774	chr1	58661705	58661910	831	205
chr1	58666961	58667900	dDHS_close	Peak_775	chr1	58667041	58667837	832	796
chr1	58670719	58670919	static	Peak_776	.	-1	-1	.	0
chr1	58671314	58672546	static	Peak_777	chr1	58671347	58672313	833	966
chr1	58709128	58709899	static	Peak_778	chr1	58709312	58709847	835	535
chr1	58768002	58768369	static	Peak_779	chr1	58767886	58768864	836	367
chr1	58769033	58770240	static	Peak_780	.	-1	-1	.	0
chr1	58800257	58800508	static	Peak_781	chr1	58800231	58800361	845	104
chr1	58818230	58818635	static	Peak_782	chr1	58818346	58818664	847	289
chr1	58827208	58827468	static	Peak_783	.	-1	-1	.	0
chr1	58851960	58852798	static	Peak_784	chr1	58851843	58852733	849	773
chr1	58859368	58859568	static	Peak_785	chr1	58859263	58859508	850	140
chr1	59007950	59008508	static	Peak_786	chr1	59008169	59008468	853	299
chr1	59014706	59014975	static	Peak_787	chr1	59014792	59015108	855	183
chr1	59029728	59031608	static	Peak_788	chr1	59029745	59031295	856	1550
chr1	59113889	59114259	static	Peak_789	.	-1	-1	.	0
chr1	59176515	59177146	static	Peak_790	chr1	59176481	59177203	859	631
chr1	59214502	59215065	static	Peak_791	chr1	59214733	59215033	860	300
chr1	59231136	59232207	static	Peak_792	chr1	59231376	59232192	861	816
chr1	59235328	59235528	static	Peak_793	chr1	59235014	59235557	862	200
chr1	59258221	59258800	dDHS_close	Peak_794	chr1	59257841	59258818	863	579
chr1	59259177	59259577	static	Peak_795	chr1	59259182	59259698	864	395
chr1	59269061	59269520	dDHS_close	Peak_796	chr1	59268510	59269569	866	459
chr1	59285199	59285461	static	Peak_797	.	-1	-1	.	0
chr1	59293673	59295037	static	Peak_798	chr1	59293679	59295072	867	1358
chr1	59378181	59379000	dDHS_close	Peak_799	chr1	59378170	59380042	869	819
chr1	59379441	59379880	dDHS_close	Peak_800	chr1	59378170	59380042	869	439
chr1	59418765	59419070	static	Peak_801	chr1	59418912	59419133	871	158
chr1	59424793	59425460	static	Peak_802	chr1	59424845	59425387	873	542
chr1	59428272	59428472	static	Peak_803	.	-1	-1	.	0
chr1	59439761	59440080	dDHS_close	Peak_804	chr1	59439412	59440510	875	319
chr1	59440241	59440440	dDHS_close	Peak_805	chr1	59439412	59440510	875	199
chr1	59442564	59442943	static	Peak_806	chr1	59442557	59442885	876	321
chr1	59445821	59446520	dDHS_close	Peak_807	chr1	59445707	59446552	877	699
chr1	59452739	59453396	static	Peak_808	chr1	59453283	59453532	879	113
chr1	59455744	59456110	static	Peak_809	.	-1	-1	.	0
chr1	59460742	59461163	static	Peak_810	chr1	59460730	59460987	880	245
chr1	59470062	59470554	static	Peak_811	chr1	59470048	59470560	881	492
chr1	59480454	59481095	static	Peak_812	chr1	59480384	59481045	884	591
chr1	59482218	59482846	static	Peak_813	.	-1	-1	.	0
chr1	59492995	59493830	static	Peak_814	chr1	59492977	59493936	887	835
chr1	59496051	59496359	static	Peak_815	chr1	59495946	59496939	888	308
chr1	59538473	59539362	static	Peak_816	.	-1	-1	.	0
chr1	59540680	59541078	static	Peak_817	.	-1	-1	.	0
chr1	59544141	59544580	dDHS_close	Peak_818	chr1	59544125	59544759	891	439
chr1	59554920	59555601	static	Peak_819	chr1	59555144	59555288	892	144
chr1	59559308	59559757	static	Peak_820	.	-1	-1	.	0
chr1	59560304	59561413	static	Peak_821	chr1	59560485	59560980	893	495
chr1	59641617	59641817	static	Peak_822	.	-1	-1	.	0
chr1	59680326	59680526	static	Peak_823	chr1	59680309	59680456	894	130
chr1	59726841	59727100	dDHS_open	Peak_824	chr1	59726801	59727220	896	259
chr1	59727519	59728017	static	Peak_825	chr1	59727443	59727894	897	375
chr1	59741421	59741620	dDHS_close	Peak_826	chr1	59741360	59742091	898	199
chr1	59744207	59744424	static	Peak_827	.	-1	-1	.	0
chr1	59820481	59820780	dDHS_open	Peak_828	chr1	59819654	59821073	900	299
chr1	59861188	59861691	static	Peak_829	.	-1	-1	.	0
chr1	59959507	59959780	static	Peak_830	chr1	59959540	59959817	902	240
chr1	59959794	59959994	static	Peak_831	chr1	59959540	59959817	902	23
chr1	59969379	59970194	static	Peak_832	chr1	59969340	59970042	903	663
chr1	60154414	60155479	static	Peak_833	chr1	60154292	60155639	905	1065
chr1	60203827	60204151	static	Peak_834	chr1	60203797	60204073	906	246
chr1	60215237	60215574	static	Peak_835	.	-1	-1	.	0
chr1	60226957	60227325	static	Peak_836	chr1	60227264	60227374	907	61
chr1	60227424	60227714	static	Peak_837	.	-1	-1	.	0
chr1	60236831	60237994	static	Peak_838	chr1	60236878	60238178	908	1116
chr1	60350838	60351363	static	Peak_839	chr1	60350807	60351298	910	460
chr1	60399744	60400611	static	Peak_840	chr1	60399799	60400695	911	812
chr1	60402467	60402667	static	Peak_841	chr1	60402544	60402903	912	123
chr1	60466115	60466813	static	Peak_842	chr1	60465960	60467061	913	698
chr1	60517686	60517907	static	Peak_843	chr1	60517591	60517822	914	136
chr1	60601160	60601389	static	Peak_844	.	-1	-1	.	0
chr1	60609073	60609507	static	Peak_845	.	-1	-1	.	0
chr1	60619916	60620196	static	Peak_846	chr1	60619936	60620220	915	260
chr1	60620968	60621342	static	Peak_847	.	-1	-1	.	0
chr1	60623469	60624191	static	Peak_848	chr1	60622896	60624353	917	722
chr1	60628268	60628974	static	Peak_849	chr1	60628276	60628794	918	518
chr1	60653061	60653320	dDHS_close	Peak_850	chr1	60653161	60654041	919	159
chr1	60656001	60656640	dDHS_close	Peak_851	chr1	60655648	60656570	921	569
chr1	60666371	60666678	static	Peak_852	chr1	60666361	60666509	923	138
chr1	60668574	60669377	static	Peak_853	chr1	60668860	60669199	924	339
chr1	60680327	60680632	static	Peak_854	chr1	60680376	60680625	925	249
chr1	60693818	60694325	static	Peak_855	chr1	60694009	60694177	926	168
chr1	60694968	60695198	static	Peak_856	.	-1	-1	.	0
chr1	60698093	60698624	static	Peak_857	chr1	60698159	60698701	927	465
chr1	60699209	60699554	static	Peak_858	chr1	60699102	60699359	928	150
chr1	60709580	60709780	static	Peak_859	chr1	60709526	60709876	930	200
chr1	60712112	60712617	static	Peak_860	chr1	60712084	60712880	931	505
chr1	60715700	60716308	static	Peak_861	chr1	60715323	60716152	934	452
chr1	60716442	60717072	static	Peak_862	chr1	60716412	60716839	935	397
chr1	60718800	60719000	static	Peak_863	chr1	60718641	60719745	936	200
chr1	60719082	60719717	static	Peak_864	chr1	60718641	60719745	936	635
chr1	60724659	60725377	static	Peak_865	chr1	60724733	60725481	937	644
chr1	60725677	60726795	static	Peak_866	chr1	60725842	60726862	938	953
chr1	60792101	60792460	dDHS_open	Peak_867	chr1	60791900	60792420	940	319
chr1	60878280	60878799	static	Peak_868	chr1	60878279	60878802	941	519
chr1	60881505	60881935	static	Peak_869	chr1	60881499	60882053	943	430
chr1	60883661	60884360	dDHS_close	Peak_870	chr1	60883708	60884595	944	652
chr1	60890641	60890960	dDHS_close	Peak_871	.	-1	-1	.	0
chr1	60903644	60904164	static	Peak_872	chr1	60903648	60904111	946	463
chr1	60916520	60917257	static	Peak_873	.	-1	-1	.	0
chr1	60917375	60917725	static	Peak_874	chr1	60917505	60918013	948	220
chr1	60917797	60917997	static	Peak_875	chr1	60917505	60918013	948	200
chr1	60919872	60920143	static	Peak_876	chr1	60919743	60920324	949	271
chr1	60922733	60923118	static	Peak_877	chr1	60922960	60923203	950	158
chr1	61011790	61011990	static	Peak_878	.	-1	-1	.	0
chr1	61017170	61017678	static	Peak_879	chr1	61017107	61017699	951	508
chr1	61200034	61200234	static	Peak_880	.	-1	-1	.	0
chr1	61409747	61409997	static	Peak_881	chr1	61409870	61410021	952	127
chr1	61430381	61430760	dDHS_open	Peak_882	chr1	61430139	61431416	953	379
chr1	61433897	61434265	static	Peak_883	.	-1	-1	.	0
chr1	61654919	61655574	static	Peak_884	.	-1	-1	.	0
chr1	61685180	61685870	static	Peak_885	chr1	61685386	61686036	956	484
chr1	61696321	61697080	dDHS_close	Peak_886	chr1	61696412	61696922	957	510
chr1	61817652	61818023	static	Peak_887	chr1	61817867	61818066	959	156
chr1	61893034	61893689	static	Peak_888	chr1	61893165	61893551	960	386
chr1	62018475	62018781	static	Peak_889	.	-1	-1	.	0
chr1	62066293	62066796	static	Peak_890	.	-1	-1	.	0
chr1	62099611	62100030	static	Peak_891	.	-1	-1	.	0
chr1	62221821	62222040	dDHS_close	Peak_892	chr1	62221668	62222232	961	219
chr1	62402434	62402724	static	Peak_893	.	-1	-1	.	0
chr1	62403131	62403424	static	Peak_894	chr1	62403223	62403440	962	201
chr1	62434686	62434941	static	Peak_895	.	-1	-1	.	0
chr1	62469490	62470061	static	Peak_896	chr1	62469537	62469917	963	380
chr1	62512845	62513343	static	Peak_897	chr1	62512873	62513108	965	235
chr1	62545493	62546360	static	Peak_898	.	-1	-1	.	0
chr1	62613195	62613568	static	Peak_899	chr1	62613299	62613450	967	151
chr1	62743533	62743778	static	Peak_900	.	-1	-1	.	0
chr1	62749811	62750058	static	Peak_901	chr1	62749411	62750366	970	247
chr1	62752716	62753880	static	Peak_902	chr1	62752639	62754260	971	1164
chr1	62770317	62772189	static	Peak_903	.	-1	-1	.	0
chr1	62781036	62781474	static	Peak_904	chr1	62781105	62781433	981	328
chr1	62794387	62794625	static	Peak_905	chr1	62794244	62794776	982	238
chr1	62794653	62795338	static	Peak_906	chr1	62794910	62795361	983	428
chr1	62796991	62797403	static	Peak_907	chr1	62797094	62797258	984	164
chr1	62823961	62824555	static	Peak_908	chr1	62823797	62824598	987	594
chr1	62841961	62842591	static	Peak_909	chr1	62842270	62842557	989	287
chr1	62856100	62856902	static	Peak_910	chr1	62856136	62856783	991	647
chr1	62858869	62859077	static	Peak_911	.	-1	-1	.	0
chr1	62870105	62870770	static	Peak_912	chr1	62869617	62870880	994	665
chr1	62946141	62946420	dDHS_close	Peak_913	chr1	62946003	62946260	997	119
chr1	62975976	62976330	static	Peak_914	chr1	62976191	62976384	998	139
chr1	63095620	63095820	static	Peak_915	.	-1	-1	.	0
chr1	63160141	63160760	dDHS_open	Peak_916	.	-1	-1	.	0
chr1	63170350	63171174	static	Peak_917	chr1	63170337	63171249	1001	824
chr1	63176131	63176439	static	Peak_918	chr1	63176393	63177067	1002	46
chr1	63176634	63177023	static	Peak_919	chr1	63176393	63177067	1002	389
chr1	63185114	63185353	static	Peak_920	chr1	63185145	63185562	1003	208
chr1	63222953	63223799	static	Peak_921	.	-1	-1	.	0
chr1	63228904	63229195	static	Peak_922	chr1	63228877	63229157	1006	253
chr1	63229243	63229443	static	Peak_923	.	-1	-1	.	0
chr1	63306044	63306265	static	Peak_924	.	-1	-1	.	0
chr1	63306420	63306833	static	Peak_925	.	-1	-1	.	0
chr1	63460540	63460740	static	Peak_926	.	-1	-1	.	0
chr1	63477144	63477606	static	Peak_927	chr1	63477207	63477613	1007	399
chr1	63480620	63481062	static	Peak_928	chr1	63480708	63481072	1008	354
chr1	63525582	63525782	static	Peak_929	chr1	63525503	63525880	1011	200
chr1	63776790	63777521	static	Peak_930	chr1	63776683	63777449	1012	659
chr1	64065377	64065870	static	Peak_931	chr1	64065316	64065644	1013	267
chr1	64087403	64088009	static	Peak_932	chr1	64087367	64088024	1015	606
chr1	64167771	64169282	static	Peak_933	chr1	64167467	64169328	1019	1511
chr1	64269097	64269488	static	Peak_934	.	-1	-1	.	0
chr1	64341915	64342240	static	Peak_935	.	-1	-1	.	0
chr1	64342288	64342501	static	Peak_936	.	-1	-1	.	0
chr1	64347830	64348030	static	Peak_937	.	-1	-1	.	0
chr1	64348084	64348596	static	Peak_938	chr1	64348036	64348675	1021	512
chr1	64351961	64352180	dDHS_open	Peak_939	chr1	64351905	64352592	1023	219
chr1	64420875	64421714	static	Peak_940	chr1	64420911	64421658	1025	747
chr1	64494486	64494922	static	Peak_941	.	-1	-1	.	0
chr1	64578675	64579767	static	Peak_942	chr1	64578556	64579883	1027	1092
chr1	64614751	64614951	static	Peak_943	.	-1	-1	.	0
chr1	64647905	64648365	static	Peak_944	.	-1	-1	.	0
chr1	64663400	64664556	static	Peak_945	chr1	64663325	64664519	1029	1119
chr1	64736921	64737721	static	Peak_946	chr1	64736949	64738160	1031	772
chr1	64751837	64752078	static	Peak_947	.	-1	-1	.	0
chr1	64763383	64763737	static	Peak_948	.	-1	-1	.	0
chr1	64784125	64785122	static	Peak_949	.	-1	-1	.	0
chr1	64789235	64789859	static	Peak_950	chr1	64789087	64789831	1036	596
chr1	64799690	64800531	static	Peak_951	chr1	64799715	64800006	1037	291
chr1	64801111	64801597	static	Peak_952	chr1	64801130	64801612	1039	467
chr1	64803124	64803411	static	Peak_953	chr1	64802625	64803427	1040	287
chr1	64834461	64834900	dDHS_open	Peak_954	chr1	64834059	64834948	1042	439
chr1	64839126	64839885	static	Peak_955	chr1	64839000	64840076	1044	759
chr1	64841859	64842350	static	Peak_956	chr1	64841875	64842237	1045	362
chr1	64855704	64856122	static	Peak_957	chr1	64855766	64856043	1046	277
chr1	64895591	64895791	static	Peak_958	.	-1	-1	.	0
chr1	64906574	64906775	static	Peak_959	.	-1	-1	.	0
chr1	64906801	64907001	static	Peak_960	.	-1	-1	.	0
chr1	64965333	64965783	static	Peak_961	.	-1	-1	.	0
chr1	65048065	65048278	static	Peak_962	.	-1	-1	.	0
chr1	65093074	65093274	static	Peak_963	.	-1	-1	.	0
chr1	65136845	65137467	static	Peak_964	chr1	65137013	65137325	1048	312
chr1	65151358	65151919	static	Peak_965	chr1	65151099	65151877	1049	519
chr1	65158648	65159877	static	Peak_966	chr1	65159183	65159965	1051	694
chr1	65164903	65165105	static	Peak_967	.	-1	-1	.	0
chr1	65165239	65165552	static	Peak_968	chr1	65165148	65165507	1052	268
chr1	65201358	65201920	static	Peak_969	chr1	65201387	65201863	1053	476
chr1	65202043	65202276	static	Peak_970	.	-1	-1	.	0
chr1	65216213	65216619	static	Peak_971	chr1	65215956	65216776	1055	406
chr1	65224032	65226033	static	Peak_972	.	-1	-1	.	0
chr1	65232563	65233617	static	Peak_973	chr1	65232702	65233711	1060	915
chr1	65247032	65247232	static	Peak_974	.	-1	-1	.	0
chr1	65329262	65329580	static	Peak_975	.	-1	-1	.	0
chr1	65359351	65359977	static	Peak_976	chr1	65359547	65359797	1061	250
chr1	65384421	65384720	dDHS_close	Peak_977	chr1	65384424	65384659	1062	235
chr1	65392552	65393325	static	Peak_978	chr1	65392600	65393002	1063	402
chr1	65430308	65430733	static	Peak_979	chr1	65430310	65430672	1064	362
chr1	65452041	65452580	dDHS_close	Peak_980	chr1	65452205	65452552	1066	347
chr1	65453921	65454640	dDHS_close	Peak_981	chr1	65454023	65454407	1067	384
chr1	65662141	65662560	dDHS_close	Peak_982	chr1	65662333	65662543	1068	210
chr1	65673173	65673485	static	Peak_983	.	-1	-1	.	0
chr1	66147891	66148477	static	Peak_984	chr1	66147918	66148396	1069	478
chr1	66283445	66283865	static	Peak_985	.	-1	-1	.	0
chr1	66312391	66312893	static	Peak_986	.	-1	-1	.	0
chr1	66312952	66313167	static	Peak_987	.	-1	-1	.	0
chr1	66702388	66702837	static	Peak_988	.	-1	-1	.	0
chr1	66717896	66718583	static	Peak_989	chr1	66717925	66718575	1072	650
chr1	66746991	66747986	static	Peak_990	chr1	66746925	66748094	1073	995
chr1	66862549	66864439	static	Peak_991	.	-1	-1	.	0
chr1	66871625	66872270	static	Peak_992	.	-1	-1	.	0
chr1	66884839	66885570	static	Peak_993	.	-1	-1	.	0
chr1	66909881	66910140	dDHS_open	Peak_994	chr1	66908881	66910165	1077	259
chr1	66918168	66918721	static	Peak_995	chr1	66918189	66918503	1078	314
chr1	66942378	66942701	static	Peak_996	chr1	66942246	66942532	1079	154
chr1	66942835	66943035	static	Peak_997	.	-1	-1	.	0
chr1	66947523	66947956	static	Peak_998	chr1	66947608	66947898	1080	290
chr1	66987544	66987799	static	Peak_999	.	-1	-1	.	0
chr1	67039456	67039788	static	Peak_1000	.	-1	-1	.	0
chr1	67048624	67049293	static	Peak_1001	chr1	67048208	67049269	1083	645
chr1	67060653	67061042	static	Peak_1002	.	-1	-1	.	0
chr1	67085276	67085572	static	Peak_1003	chr1	67085034	67085610	1089	296
chr1	67102144	67102923	static	Peak_1004	chr1	67102109	67103042	1090	779
chr1	67107895	67108628	static	Peak_1005	chr1	67108098	67108458	1091	360
chr1	67113841	67114173	static	Peak_1006	.	-1	-1	.	0
chr1	67123991	67124927	static	Peak_1007	chr1	67124023	67124859	1093	836
chr1	67125232	67125594	static	Peak_1008	chr1	67125167	67125626	1094	362
chr1	67138552	67139694	static	Peak_1009	chr1	67139009	67139511	1095	502
chr1	67148721	67149180	dDHS_close	Peak_1010	chr1	67148756	67149354	1097	424
chr1	67150821	67151160	dDHS_close	Peak_1011	chr1	67150014	67150901	1099	80
chr1	67159912	67160545	static	Peak_1012	chr1	67159900	67160583	1100	633
chr1	67162975	67163723	static	Peak_1013	chr1	67162863	67163703	1101	728
chr1	67164281	67164820	dDHS_close	Peak_1014	chr1	67164361	67164789	1102	428
chr1	67169271	67169967	static	Peak_1015	chr1	67169264	67169996	1103	696
chr1	67171703	67172444	static	Peak_1016	chr1	67171060	67172434	1104	731
chr1	67190415	67190652	static	Peak_1017	chr1	67190321	67190677	1110	237
chr1	67263859	67264307	static	Peak_1018	chr1	67263803	67264435	1151	448
chr1	67279981	67280244	static	Peak_1019	.	-1	-1	.	0
chr1	67314551	67314955	static	Peak_1020	chr1	67314687	67314885	1163	198
chr1	67319109	67319665	static	Peak_1021	.	-1	-1	.	0
chr1	67355882	67356196	static	Peak_1022	.	-1	-1	.	0
chr1	67359359	67359989	static	Peak_1023	.	-1	-1	.	0
chr1	67404221	67404580	dDHS_close	Peak_1024	chr1	67404270	67404641	1164	310
chr1	68002562	68002847	static	Peak_1025	.	-1	-1	.	0
chr1	69020345	69020749	static	Peak_1026	chr1	69020391	69020677	1165	286
chr1	69680822	69681022	static	Peak_1027	.	-1	-1	.	0
chr1	69734027	69734422	static	Peak_1028	chr1	69734043	69734467	1166	379
chr1	69735721	69735949	static	Peak_1029	.	-1	-1	.	0
chr1	69848268	69848468	static	Peak_1030	.	-1	-1	.	0
chr1	69940821	69941440	dDHS_close	Peak_1031	chr1	69940904	69941368	1167	464
chr1	70289643	70289948	static	Peak_1032	.	-1	-1	.	0
chr1	70328005	70328540	static	Peak_1033	.	-1	-1	.	0
chr1	70738984	70739523	static	Peak_1034	chr1	70739056	70739494	1168	438
chr1	70857293	70857742	static	Peak_1035	.	-1	-1	.	0
chr1	70868227	70868427	static	Peak_1036	.	-1	-1	.	0
chr1	70939125	70939325	static	Peak_1037	.	-1	-1	.	0
chr1	70964863	70965327	static	Peak_1038	.	-1	-1	.	0
chr1	70974079	70974287	static	Peak_1039	.	-1	-1	.	0
chr1	70974346	70974862	static	Peak_1040	.	-1	-1	.	0
chr1	71103351	71103551	static	Peak_1041	.	-1	-1	.	0
chr1	71148990	71150127	static	Peak_1042	chr1	71148825	71150011	1171	1021
chr1	71277478	71278398	static	Peak_1043	chr1	71277838	71278355	1172	517
chr1	71576677	71577301	static	Peak_1044	.	-1	-1	.	0
chr1	71603348	71604169	static	Peak_1045	chr1	71603468	71604176	1174	701
chr1	71622399	71622977	static	Peak_1046	chr1	71622390	71623435	1175	578
chr1	71626046	71626519	static	Peak_1047	chr1	71626073	71626491	1179	418
chr1	71629917	71630141	static	Peak_1048	chr1	71629758	71630252	1182	224
chr1	71678983	71679251	static	Peak_1049	chr1	71679026	71679334	1191	225
chr1	71680948	71681717	static	Peak_1050	chr1	71680965	71681929	1193	752
chr1	71693378	71694163	static	Peak_1051	chr1	71693395	71694163	1196	768
chr1	71697313	71697680	static	Peak_1052	chr1	71697076	71697756	1198	367
chr1	71699172	71700282	static	Peak_1053	chr1	71698911	71700816	1200	1110
chr1	71703001	71703260	dDHS_close	Peak_1054	.	-1	-1	.	0
chr1	71722123	71722408	static	Peak_1055	.	-1	-1	.	0
chr1	71768747	71769169	static	Peak_1056	.	-1	-1	.	0
chr1	71770201	71770840	dDHS_close	Peak_1057	chr1	71770379	71770827	1202	448
chr1	71777592	71777793	static	Peak_1058	.	-1	-1	.	0
chr1	71778053	71778683	static	Peak_1059	chr1	71778247	71778718	1203	436
chr1	71806432	71806796	static	Peak_1060	.	-1	-1	.	0
chr1	71847277	71847515	static	Peak_1061	.	-1	-1	.	0
chr1	71854081	71854980	dDHS_close	Peak_1062	chr1	71854220	71854482	1205	262
chr1	71859855	71860450	static	Peak_1063	.	-1	-1	.	0
chr1	71864293	71864496	static	Peak_1064	.	-1	-1	.	0
chr1	71883894	71884956	static	Peak_1065	chr1	71883766	71884180	1207	286
chr1	71920581	71921060	dDHS_close	Peak_1066	chr1	71920724	71920968	1209	244
chr1	71933221	71933840	dDHS_close	Peak_1067	.	-1	-1	.	0
chr1	71934101	71934560	dDHS_close	Peak_1068	.	-1	-1	.	0
chr1	71940253	71940500	static	Peak_1069	.	-1	-1	.	0
chr1	71945576	71946610	static	Peak_1070	chr1	71945787	71946127	1211	340
chr1	71958712	71959723	static	Peak_1071	chr1	71958832	71959597	1213	765
chr1	71959796	71960198	static	Peak_1072	chr1	71959804	71960209	1214	394
chr1	71971905	71972559	static	Peak_1073	chr1	71972191	71972378	1215	187
chr1	71984785	71985703	static	Peak_1074	chr1	71984537	71985679	1217	894
chr1	71987518	71987825	static	Peak_1075	chr1	71987522	71987815	1218	293
chr1	72011068	72011770	static	Peak_1076	.	-1	-1	.	0
chr1	72055998	72056355	static	Peak_1077	chr1	72055840	72056106	1219	108
chr1	72059097	72059803	static	Peak_1078	chr1	72059356	72059596	1220	240
chr1	72070999	72071237	static	Peak_1079	.	-1	-1	.	0
chr1	72074662	72074931	static	Peak_1080	.	-1	-1	.	0
chr1	72078641	72079440	dDHS_close	Peak_1081	chr1	72078794	72079219	1222	425
chr1	72082556	72082994	static	Peak_1082	chr1	72082688	72082901	1223	213
chr1	72170052	72170499	static	Peak_1083	chr1	72170322	72170492	1224	170
chr1	72188490	72188690	static	Peak_1084	.	-1	-1	.	0
chr1	72219583	72220504	static	Peak_1085	chr1	72219516	72220519	1226	921
chr1	72226292	72226931	static	Peak_1086	chr1	72226403	72227061	1229	528
chr1	72229613	72230062	static	Peak_1087	chr1	72229539	72230115	1230	449
chr1	72256744	72257805	static	Peak_1088	chr1	72257170	72257832	1232	635
chr1	72258472	72259168	static	Peak_1089	chr1	72258129	72259020	1233	548
chr1	72272226	72272652	static	Peak_1090	chr1	72271889	72273538	1235	426
chr1	72272821	72273620	dDHS_close	Peak_1091	chr1	72271889	72273538	1235	717
chr1	72282964	72283210	static	Peak_1092	chr1	72282971	72283287	1236	239
chr1	72283664	72284056	static	Peak_1093	chr1	72283533	72283790	1237	126
chr1	72290801	72291040	dDHS_close	Peak_1094	chr1	72290192	72291185	1238	239
chr1	72301169	72301513	static	Peak_1095	chr1	72300908	72302352	1239	344
chr1	72301701	72302000	dDHS_close	Peak_1096	chr1	72300908	72302352	1239	299
chr1	72309745	72310001	static	Peak_1097	.	-1	-1	.	0
chr1	72324423	72325018	static	Peak_1098	chr1	72324365	72325015	1242	592
chr1	72328774	72329006	static	Peak_1099	chr1	72328512	72329604	1245	232
chr1	72329073	72329693	static	Peak_1100	chr1	72328512	72329604	1245	531
chr1	72330495	72330979	static	Peak_1101	chr1	72330498	72331074	1246	481
chr1	72334633	72334840	static	Peak_1102	chr1	72334314	72335709	1248	207
chr1	72334937	72335698	static	Peak_1103	chr1	72334314	72335709	1248	761
chr1	72340434	72341119	static	Peak_1104	chr1	72340456	72340810	1251	354
chr1	72343840	72344156	static	Peak_1105	chr1	72343932	72344179	1253	224
chr1	72353257	72354462	static	Peak_1106	chr1	72353583	72354369	1254	786
chr1	72381153	72381905	static	Peak_1107	chr1	72381351	72381783	1255	432
chr1	72459621	72459960	dDHS_close	Peak_1108	chr1	72459552	72459872	1256	251
chr1	72630101	72630340	dDHS_open	Peak_1109	chr1	72629491	72630309	1257	208
chr1	72745441	72745800	dDHS_close	Peak_1110	.	-1	-1	.	0
chr1	72757654	72758242	static	Peak_1111	chr1	72757520	72758471	1259	588
chr1	72763671	72763914	static	Peak_1112	.	-1	-1	.	0
chr1	72765433	72765829	static	Peak_1113	chr1	72765489	72765930	1260	340
chr1	72772089	72773166	static	Peak_1114	chr1	72772535	72772907	1261	372
chr1	72785670	72785990	static	Peak_1115	chr1	72785486	72785922	1262	252
chr1	72797907	72798386	static	Peak_1116	chr1	72797940	72798293	1263	353
chr1	72806456	72806878	static	Peak_1117	chr1	72806365	72806655	1264	199
chr1	72819381	72819640	dDHS_open	Peak_1118	chr1	72819203	72820355	1265	259
chr1	72838135	72839307	static	Peak_1119	chr1	72838203	72839351	1267	1104
chr1	72855641	72855860	dDHS_open	Peak_1120	chr1	72855777	72857230	1269	83
chr1	72856321	72857140	dDHS_open	Peak_1121	chr1	72855777	72857230	1269	819
chr1	72870521	72871160	dDHS_open	Peak_1122	chr1	72870547	72871536	1270	613
chr1	72883783	72884110	static	Peak_1123	.	-1	-1	.	0
chr1	72889170	72889977	static	Peak_1124	chr1	72889216	72889881	1272	665
chr1	72900421	72901220	dDHS_open	Peak_1125	chr1	72900481	72901821	1273	739
chr1	72916752	72917928	static	Peak_1126	chr1	72916734	72917981	1276	1176
chr1	72918742	72918956	static	Peak_1127	chr1	72918117	72918917	1277	175
chr1	73246720	73247067	static	Peak_1128	chr1	73246680	73247090	1282	347
chr1	73346656	73347175	static	Peak_1129	chr1	73346619	73347163	1283	507
chr1	73575215	73575561	static	Peak_1130	chr1	73575218	73575574	1285	343
chr1	73676694	73677395	static	Peak_1131	chr1	73676872	73677366	1287	494
chr1	73701494	73702003	static	Peak_1132	.	-1	-1	.	0
chr1	73730595	73731155	static	Peak_1133	.	-1	-1	.	0
chr1	73872951	73873229	static	Peak_1134	chr1	73872902	73873168	1289	217
chr1	73975788	73976271	static	Peak_1135	.	-1	-1	.	0
chr1	73977043	73977517	static	Peak_1136	.	-1	-1	.	0
chr1	73978974	73979543	static	Peak_1137	chr1	73978980	73979971	1303	563
chr1	73983166	73983546	static	Peak_1138	chr1	73983124	73984105	1304	380
chr1	73984389	73984811	static	Peak_1139	chr1	73984357	73984766	1305	377
chr1	74012780	74013295	static	Peak_1140	chr1	74012847	74013353	1306	448
chr1	74033198	74033509	static	Peak_1141	.	-1	-1	.	0
chr1	74044756	74045158	static	Peak_1142	chr1	74045154	74045270	1308	4
chr1	74055053	74055276	static	Peak_1143	chr1	74055017	74055898	1310	223
chr1	74059573	74060317	static	Peak_1144	chr1	74059482	74060629	1311	744
chr1	74061037	74061517	static	Peak_1145	chr1	74060987	74061851	1312	480
chr1	74074128	74074587	static	Peak_1146	chr1	74074028	74074886	1318	459
chr1	74077790	74077990	static	Peak_1147	chr1	74077506	74077958	1320	168
chr1	74083409	74083707	static	Peak_1148	chr1	74083417	74083573	1321	156
chr1	74090153	74091403	static	Peak_1149	chr1	74090907	74091457	1323	496
chr1	74104861	74105080	dDHS_open	Peak_1150	chr1	74104777	74105853	1326	219
chr1	74108349	74108738	static	Peak_1151	chr1	74108276	74108696	1328	347
chr1	74115364	74117223	static	Peak_1152	.	-1	-1	.	0
chr1	74123818	74124156	static	Peak_1153	.	-1	-1	.	0
chr1	74128938	74129641	static	Peak_1154	chr1	74129240	74129728	1333	401
chr1	74152380	74152600	static	Peak_1155	chr1	74152293	74152555	1334	175
chr1	74156146	74156578	static	Peak_1156	chr1	74156266	74156579	1335	312
chr1	74171155	74171927	static	Peak_1157	chr1	74171714	74172012	1337	213
chr1	74171969	74172190	static	Peak_1158	chr1	74171714	74172012	1337	43
chr1	74236913	74237566	static	Peak_1159	chr1	74236822	74237528	1338	615
chr1	74239296	74239680	static	Peak_1160	chr1	74239241	74239644	1339	348
chr1	74243521	74243760	dDHS_close	Peak_1161	chr1	74243135	74243818	1341	239
chr1	74252342	74252898	static	Peak_1162	.	-1	-1	.	0
chr1	74276537	74276796	static	Peak_1163	chr1	74276574	74276819	1343	222
chr1	74277453	74277678	static	Peak_1164	.	-1	-1	.	0
chr1	74282584	74283580	static	Peak_1165	chr1	74282647	74283827	1344	933
chr1	74295345	74296516	static	Peak_1166	chr1	74295973	74296456	1346	483
chr1	74330741	74331220	dDHS_open	Peak_1167	chr1	74330702	74332012	1348	479
chr1	74342203	74342607	static	Peak_1168	chr1	74342235	74342693	1352	372
chr1	74350350	74351399	static	Peak_1169	chr1	74350280	74350962	1353	612
chr1	74353671	74354019	static	Peak_1170	chr1	74353791	74353947	1354	156
chr1	74359736	74360510	static	Peak_1171	chr1	74360037	74360178	1355	141
chr1	74365465	74365665	static	Peak_1172	.	-1	-1	.	0
chr1	74378690	74379383	static	Peak_1173	chr1	74378573	74379426	1356	693
chr1	74382081	74382661	static	Peak_1174	chr1	74382042	74382664	1358	580
chr1	74386664	74387416	static	Peak_1175	chr1	74386744	74387370	1359	626
chr1	74408400	74408766	static	Peak_1176	chr1	74408483	74408640	1360	157
chr1	74425288	74426048	static	Peak_1177	chr1	74425554	74426033	1362	479
chr1	74428089	74428299	static	Peak_1178	.	-1	-1	.	0
chr1	74433189	74433935	static	Peak_1179	chr1	74433175	74433958	1363	746
chr1	74438761	74439120	dDHS_open	Peak_1180	.	-1	-1	.	0
chr1	74443329	74444567	static	Peak_1181	chr1	74443059	74444961	1370	1238
chr1	74446969	74447435	static	Peak_1182	chr1	74446948	74447472	1371	466
chr1	74450942	74451395	static	Peak_1183	chr1	74451006	74451355	1372	349
chr1	74461724	74461926	static	Peak_1184	chr1	74461639	74462143	1373	202
chr1	74499132	74499571	static	Peak_1185	.	-1	-1	.	0
chr1	74552259	74553004	static	Peak_1186	chr1	74552211	74553326	1374	745
chr1	74558104	74558345	static	Peak_1187	.	-1	-1	.	0
chr1	74634340	74635211	static	Peak_1188	chr1	74634063	74635162	1375	822
chr1	74647641	74648178	static	Peak_1189	chr1	74647592	74648365	1376	537
chr1	74707786	74708710	static	Peak_1190	chr1	74707911	74708687	1377	776
chr1	74745150	74745783	static	Peak_1191	chr1	74745369	74745722	1379	353
chr1	74759338	74760276	static	Peak_1192	chr1	74759337	74760481	1380	938
chr1	74765825	74766230	static	Peak_1193	chr1	74765768	74766197	1381	372
chr1	74767721	74768380	dDHS_close	Peak_1194	chr1	74767648	74768817	1382	659
chr1	74770421	74770980	dDHS_close	Peak_1195	chr1	74770472	74770750	1383	278
chr1	74797321	74797680	dDHS_close	Peak_1196	chr1	74797276	74797682	1384	359
chr1	74819673	74820025	static	Peak_1197	chr1	74819785	74819966	1385	181
chr1	74849797	74850012	static	Peak_1198	chr1	74849636	74849979	1386	182
chr1	74853561	74854700	dDHS_open	Peak_1199	chr1	74854236	74854986	1387	464
chr1	74854721	74855040	dDHS_open	Peak_1200	chr1	74854236	74854986	1387	265
chr1	74863101	74863600	dDHS_close	Peak_1201	chr1	74863161	74863797	1388	439
chr1	74947328	74948023	static	Peak_1202	chr1	74947377	74947929	1389	552
chr1	74948162	74948527	static	Peak_1203	.	-1	-1	.	0
chr1	74995991	74996850	static	Peak_1204	chr1	74995495	74996895	1390	859
chr1	74997916	74998256	static	Peak_1205	.	-1	-1	.	0
chr1	75008245	75008553	static	Peak_1206	chr1	75008305	75008609	1393	248
chr1	75009084	75009916	static	Peak_1207	chr1	75009034	75009896	1394	812
chr1	75018041	75018340	dDHS_close	Peak_1208	chr1	75018186	75018560	1396	154
chr1	75053570	75053882	static	Peak_1209	.	-1	-1	.	0
chr1	75056511	75057253	static	Peak_1210	chr1	75056553	75057098	1397	545
chr1	75061199	75061399	static	Peak_1211	chr1	75060943	75061343	1398	144
chr1	75061421	75062056	static	Peak_1212	chr1	75061773	75062028	1399	255
chr1	75071061	75071480	dDHS_close	Peak_1213	chr1	75071051	75071607	1401	419
chr1	75091219	75091471	static	Peak_1214	.	-1	-1	.	0
chr1	75098740	75098947	static	Peak_1215	.	-1	-1	.	0
chr1	75118181	75118500	dDHS_close	Peak_1216	chr1	75118172	75118420	1404	239
chr1	75121084	75121986	static	Peak_1217	chr1	75120677	75121962	1405	878
chr1	75138421	75139788	static	Peak_1218	chr1	75138838	75139956	1407	950
chr1	75143881	75145540	dDHS_open	Peak_1219	chr1	75143932	75144800	1408	868
chr1	75165032	75165866	static	Peak_1220	chr1	75164805	75165922	1410	834
chr1	75175926	75177211	static	Peak_1221	chr1	75176086	75177245	1412	1125
chr1	75188218	75189268	static	Peak_1222	chr1	75187931	75189253	1416	1035
chr1	75207091	75207718	static	Peak_1223	chr1	75206995	75207976	1417	627
chr1	75210988	75211895	static	Peak_1224	chr1	75210931	75211931	1420	907
chr1	75215552	75216233	static	Peak_1225	chr1	75214934	75216629	1424	681
chr1	75232572	75233559	static	Peak_1226	chr1	75232670	75233713	1427	889
chr1	75248001	75248713	static	Peak_1227	chr1	75248001	75248569	1430	568
chr1	75281687	75282041	static	Peak_1228	.	-1	-1	.	0
chr1	75313547	75314697	static	Peak_1229	chr1	75312964	75314788	1435	1150
chr1	75333732	75333989	static	Peak_1230	chr1	75333655	75333810	1436	78
chr1	75334381	75334940	dDHS_close	Peak_1231	chr1	75334324	75334511	1437	130
chr1	75341285	75341485	static	Peak_1232	.	-1	-1	.	0
chr1	75432196	75432861	static	Peak_1233	chr1	75432436	75432716	1439	280
chr1	75473997	75474251	static	Peak_1234	chr1	75473848	75474267	1441	254
chr1	75475575	75476244	static	Peak_1235	chr1	75475590	75476356	1442	654
chr1	75517749	75518570	static	Peak_1236	chr1	75517947	75518463	1443	516
chr1	75534201	75534560	dDHS_close	Peak_1237	chr1	75534220	75534508	1444	288
chr1	75535161	75535760	dDHS_close	Peak_1238	chr1	75535292	75535652	1445	360
chr1	75537251	75537517	static	Peak_1239	.	-1	-1	.	0
chr1	75584556	75585123	static	Peak_1240	chr1	75584637	75585020	1447	383
chr1	75613687	75613887	static	Peak_1241	.	-1	-1	.	0
chr1	75632030	75632568	static	Peak_1242	chr1	75632142	75632453	1448	311
chr1	75649112	75649666	static	Peak_1243	chr1	75649238	75649458	1449	220
chr1	75650187	75650825	static	Peak_1244	chr1	75650336	75650679	1450	343
chr1	75657481	75657700	dDHS_open	Peak_1245	chr1	75656762	75657682	1451	201
chr1	75689553	75690224	static	Peak_1246	.	-1	-1	.	0
chr1	75933336	75933602	static	Peak_1247	.	-1	-1	.	0
chr1	76006975	76007287	static	Peak_1248	.	-1	-1	.	0
chr1	76035746	76036175	static	Peak_1249	chr1	76035652	76036139	1453	393
chr1	76046848	76047413	static	Peak_1250	.	-1	-1	.	0
chr1	76297258	76297458	static	Peak_1251	.	-1	-1	.	0
chr1	76370499	76370720	static	Peak_1252	chr1	76370578	76370871	1454	142
chr1	76739524	76739981	static	Peak_1253	.	-1	-1	.	0
chr1	76853611	76853878	static	Peak_1254	.	-1	-1	.	0
chr1	76879644	76880108	static	Peak_1255	.	-1	-1	.	0
chr1	76907825	76908477	static	Peak_1256	chr1	76907890	76908430	1455	540
chr1	76915941	76916440	dDHS_close	Peak_1257	chr1	76915581	76916605	1456	499
chr1	76939248	76939798	static	Peak_1258	chr1	76939225	76939851	1457	550
chr1	77276199	77276419	static	Peak_1259	.	-1	-1	.	0
chr1	77462155	77462380	static	Peak_1260	chr1	77462208	77462527	1459	172
chr1	77462828	77463028	static	Peak_1261	.	-1	-1	.	0
chr1	77511729	77512017	static	Peak_1262	.	-1	-1	.	0
chr1	77512652	77513192	static	Peak_1263	.	-1	-1	.	0
chr1	77939813	77940028	static	Peak_1264	.	-1	-1	.	0
chr1	77962248	77962471	static	Peak_1265	.	-1	-1	.	0
chr1	78090283	78090619	static	Peak_1266	chr1	78090335	78090483	1463	148
chr1	78139521	78140120	dDHS_close	Peak_1267	chr1	78139576	78139989	1464	413
chr1	78154662	78154862	static	Peak_1268	.	-1	-1	.	0
chr1	78190693	78190921	static	Peak_1269	.	-1	-1	.	0
chr1	78192595	78192795	static	Peak_1270	.	-1	-1	.	0
chr1	78192801	78193042	static	Peak_1271	.	-1	-1	.	0
chr1	78318772	78319448	static	Peak_1272	chr1	78318857	78319322	1465	465
chr1	78479826	78480324	static	Peak_1273	.	-1	-1	.	0
chr1	78485078	78486026	static	Peak_1274	chr1	78484894	78486170	1466	948
chr1	78507496	78507850	static	Peak_1275	.	-1	-1	.	0
chr1	78533506	78534720	static	Peak_1276	chr1	78534036	78534672	1471	636
chr1	78535074	78535298	static	Peak_1277	chr1	78535029	78535499	1472	224
chr1	78564444	78565158	static	Peak_1278	chr1	78564548	78565162	1473	610
chr1	78583569	78584089	static	Peak_1279	chr1	78583628	78583928	1474	300
chr1	78645929	78647000	static	Peak_1280	chr1	78646285	78646631	1475	346
chr1	78654721	78655120	dDHS_open	Peak_1281	chr1	78654088	78655473	1477	399
chr1	78721148	78721371	static	Peak_1282	chr1	78721116	78721304	1479	156
chr1	79411456	79411837	static	Peak_1283	.	-1	-1	.	0
chr1	79412086	79412364	static	Peak_1284	.	-1	-1	.	0
chr1	79412870	79413380	static	Peak_1285	chr1	79412987	79413286	1481	299
chr1	79463141	79463500	dDHS_close	Peak_1286	chr1	79463104	79463817	1482	359
chr1	79577924	79578485	static	Peak_1287	.	-1	-1	.	0
chr1	79589370	79589605	static	Peak_1288	chr1	79589327	79589682	1483	235
chr1	79668477	79668896	static	Peak_1289	chr1	79668369	79668986	1484	419
chr1	79757978	79758659	static	Peak_1290	chr1	79757278	79758716	1486	681
chr1	79772258	79773080	static	Peak_1291	chr1	79772448	79773110	1487	632
chr1	79846934	79847153	static	Peak_1292	.	-1	-1	.	0
chr1	80322325	80322731	static	Peak_1293	chr1	80322488	80322653	1489	165
chr1	80336825	80337979	static	Peak_1294	chr1	80336272	80338123	1490	1154
chr1	80405262	80405468	static	Peak_1295	chr1	80405151	80405499	1491	206
chr1	80414671	80415173	static	Peak_1296	.	-1	-1	.	0
chr1	80424480	80425002	static	Peak_1297	chr1	80424533	80424864	1492	331
chr1	80444493	80444700	static	Peak_1298	.	-1	-1	.	0
chr1	80451828	80452182	static	Peak_1299	.	-1	-1	.	0
chr1	81313278	81313478	static	Peak_1300	.	-1	-1	.	0
chr1	81513163	81513368	static	Peak_1301	.	-1	-1	.	0
chr1	81576256	81576498	static	Peak_1302	.	-1	-1	.	0
chr1	81741235	81741810	static	Peak_1303	chr1	81741133	81742172	1493	575
chr1	81885168	81885660	static	Peak_1304	.	-1	-1	.	0
chr1	81924240	81924692	static	Peak_1305	.	-1	-1	.	0
chr1	81946523	81947972	static	Peak_1306	chr1	81946393	81947183	1494	660
chr1	81964172	81964900	static	Peak_1307	chr1	81964396	81964707	1496	311
chr1	82007534	82007917	static	Peak_1308	.	-1	-1	.	0
chr1	82011967	82012229	static	Peak_1309	.	-1	-1	.	0
chr1	82015112	82015574	static	Peak_1310	.	-1	-1	.	0
chr1	82026798	82027166	static	Peak_1311	.	-1	-1	.	0
chr1	82028074	82028326	static	Peak_1312	.	-1	-1	.	0
chr1	82028906	82029589	static	Peak_1313	chr1	82029041	82029297	1497	256
chr1	82121170	82121440	static	Peak_1314	chr1	82121238	82121370	1498	132
chr1	82141710	82142178	static	Peak_1315	chr1	82141926	82142083	1499	157
chr1	82154901	82155420	dDHS_close	Peak_1316	chr1	82154931	82155388	1500	457
chr1	82155643	82156376	static	Peak_1317	chr1	82155641	82156306	1501	663
chr1	82164591	82165942	static	Peak_1318	chr1	82164762	82165938	1503	1176
chr1	82176890	82177360	static	Peak_1319	chr1	82176931	82177707	1504	429
chr1	82180410	82181525	static	Peak_1320	chr1	82180365	82181547	1505	1115
chr1	82185381	82185720	dDHS_close	Peak_1321	chr1	82185489	82185682	1506	193
chr1	82231241	82231840	dDHS_close	Peak_1322	chr1	82231138	82232011	1507	599
chr1	82234824	82235264	static	Peak_1323	chr1	82234805	82235278	1508	440
chr1	82243885	82244773	static	Peak_1324	chr1	82243960	82244741	1511	781
chr1	82255241	82255494	static	Peak_1325	chr1	82254990	82255244	1512	3
chr1	82260371	82260605	static	Peak_1326	chr1	82260476	82260670	1513	129
chr1	82279591	82280352	static	Peak_1327	chr1	82279514	82280851	1515	761
chr1	82280556	82280965	static	Peak_1328	chr1	82279514	82280851	1515	295
chr1	82281009	82281274	static	Peak_1329	chr1	82281022	82281333	1516	252
chr1	82282839	82283209	static	Peak_1330	chr1	82283034	82284388	1517	175
chr1	82287300	82288375	static	Peak_1331	.	-1	-1	.	0
chr1	82312679	82313550	static	Peak_1332	chr1	82312635	82313642	1523	871
chr1	82638101	82638737	static	Peak_1333	.	-1	-1	.	0
chr1	82721259	82721911	static	Peak_1334	chr1	82721282	82722061	1526	629
chr1	82784005	82784543	static	Peak_1335	chr1	82784025	82784372	1527	347
chr1	82812415	82812914	static	Peak_1336	chr1	82812570	82812862	1528	292
chr1	82831316	82831679	static	Peak_1337	.	-1	-1	.	0
chr1	82835808	82836385	static	Peak_1338	chr1	82835703	82836574	1529	577
chr1	82959197	82959548	static	Peak_1339	.	-1	-1	.	0
chr1	83742764	83742973	static	Peak_1340	.	-1	-1	.	0
chr1	83857730	83857984	static	Peak_1341	.	-1	-1	.	0
chr1	83896701	83897380	dDHS_close	Peak_1342	chr1	83896719	83897207	1533	488
chr1	83903501	83903960	dDHS_close	Peak_1343	chr1	83903348	83903989	1534	459
chr1	83939664	83940051	static	Peak_1344	.	-1	-1	.	0
chr1	83956241	83956855	static	Peak_1345	chr1	83956389	83956676	1535	287
chr1	84034776	84035027	static	Peak_1346	chr1	84034558	84035037	1537	251
chr1	84128661	84128970	static	Peak_1347	.	-1	-1	.	0
chr1	84151302	84151557	static	Peak_1348	.	-1	-1	.	0
chr1	84191557	84191780	static	Peak_1349	.	-1	-1	.	0
chr1	84222264	84222728	static	Peak_1350	chr1	84222223	84222652	1539	388
chr1	84237861	84238080	dDHS_close	Peak_1351	chr1	84237646	84238355	1541	219
chr1	84250173	84250960	static	Peak_1352	chr1	84250349	84250859	1542	510
chr1	84269306	84270066	static	Peak_1353	chr1	84269545	84269918	1544	373
chr1	84275821	84276100	dDHS_close	Peak_1354	chr1	84274775	84276172	1547	279
chr1	84280893	84281272	static	Peak_1355	chr1	84280682	84282657	1550	379
chr1	84282153	84282668	static	Peak_1356	chr1	84280682	84282657	1550	504
chr1	84296173	84296699	static	Peak_1357	.	-1	-1	.	0
chr1	84299481	84299720	dDHS_close	Peak_1358	.	-1	-1	.	0
chr1	84306710	84307002	static	Peak_1359	.	-1	-1	.	0
chr1	84314110	84314868	static	Peak_1360	.	-1	-1	.	0
chr1	84359179	84359878	static	Peak_1361	chr1	84359398	84359850	1552	452
chr1	84377727	84378005	static	Peak_1362	.	-1	-1	.	0
chr1	84396581	84396780	dDHS_open	Peak_1363	chr1	84396198	84396767	1553	186
chr1	84403727	84403927	static	Peak_1364	.	-1	-1	.	0
chr1	84415957	84416803	static	Peak_1365	chr1	84416008	84416783	1554	775
chr1	84429736	84430447	static	Peak_1366	.	-1	-1	.	0
chr1	84693745	84694096	static	Peak_1367	.	-1	-1	.	0
chr1	84718358	84718669	static	Peak_1368	chr1	84718452	84718886	1556	217
chr1	84718848	84719430	static	Peak_1369	chr1	84719034	84719268	1557	234
chr1	84719437	84719731	static	Peak_1370	chr1	84719502	84719746	1558	229
chr1	84743629	84743829	static	Peak_1371	.	-1	-1	.	0
chr1	84835804	84836773	static	Peak_1372	chr1	84835151	84837082	1559	969
chr1	84847941	84848807	static	Peak_1373	chr1	84848133	84848628	1560	495
chr1	84867678	84869200	static	Peak_1374	chr1	84867669	84868435	1561	757
chr1	84874152	84874614	static	Peak_1375	chr1	84874223	84874522	1563	299
chr1	87600217	87600517	static	Peak_1376	chr1	87599917	87600404	1568	187
chr1	87632191	87632548	static	Peak_1377	.	-1	-1	.	0
chr1	87689656	87691334	static	Peak_1378	chr1	87690562	87691282	1570	720
chr1	87697882	87698109	static	Peak_1379	.	-1	-1	.	0
chr1	87750206	87750413	static	Peak_1380	.	-1	-1	.	0
chr1	87790899	87791260	static	Peak_1381	chr1	87790896	87791349	1573	361
chr1	87791389	87791603	static	Peak_1382	.	-1	-1	.	0
chr1	87819260	87819642	static	Peak_1383	chr1	87819473	87819806	1575	169
chr1	87829758	87830061	static	Peak_1384	chr1	87829751	87829913	1576	155
chr1	87832065	87832515	static	Peak_1385	.	-1	-1	.	0
chr1	87856574	87856840	static	Peak_1386	.	-1	-1	.	0
chr1	87878532	87878816	static	Peak_1387	chr1	87878647	87878849	1578	169
chr1	87904107	87904957	static	Peak_1388	chr1	87904487	87904674	1579	187
chr1	87914773	87915068	static	Peak_1389	.	-1	-1	.	0
chr1	87934927	87935616	static	Peak_1390	chr1	87934522	87935605	1580	678
chr1	87935858	87936058	static	Peak_1391	chr1	87935783	87936438	1581	200
chr1	87936635	87937241	static	Peak_1392	chr1	87936643	87937237	1582	594
chr1	87937476	87937884	static	Peak_1393	chr1	87937472	87937941	1583	408
chr1	87942855	87944253	static	Peak_1394	chr1	87942391	87944275	1584	1398
chr1	87949625	87950328	static	Peak_1395	chr1	87949445	87950363	1585	703
chr1	87952604	87953434	static	Peak_1396	chr1	87952645	87953710	1587	789
chr1	87955494	87956346	static	Peak_1397	chr1	87955446	87956518	1589	852
chr1	87960836	87961560	static	Peak_1398	chr1	87960157	87961940	1591	724
chr1	88050847	88051494	static	Peak_1399	chr1	88051036	88051537	1592	458
chr1	88072384	88073160	static	Peak_1400	chr1	88072596	88073162	1593	564
chr1	88075446	88075702	static	Peak_1401	chr1	88075475	88075895	1594	227
chr1	88235887	88236243	static	Peak_1402	.	-1	-1	.	0
chr1	88255347	88256406	static	Peak_1403	chr1	88255129	88256768	1595	1059
chr1	88303240	88304051	static	Peak_1404	chr1	88303284	88303913	1598	629
chr1	88312523	88312726	static	Peak_1405	chr1	88312442	88312626	1599	103
chr1	88330621	88331220	dDHS_open	Peak_1406	chr1	88330575	88331552	1601	599
chr1	88337181	88337573	static	Peak_1407	chr1	88337022	88337520	1603	339
chr1	88338221	88338960	dDHS_open	Peak_1408	chr1	88338508	88339506	1605	452
chr1	88366794	88367760	static	Peak_1409	chr1	88366733	88367835	1606	966
chr1	88375523	88376085	static	Peak_1410	chr1	88375714	88375986	1607	272
chr1	88383627	88384643	static	Peak_1411	chr1	88383683	88384777	1608	960
chr1	88393808	88394208	static	Peak_1412	chr1	88393815	88395016	1612	393
chr1	88394342	88394953	static	Peak_1413	chr1	88393815	88395016	1612	611
chr1	88400429	88401339	static	Peak_1414	chr1	88400115	88401414	1615	910
chr1	88406063	88406461	static	Peak_1415	chr1	88406017	88406373	1619	310
chr1	88421401	88421840	dDHS_open	Peak_1416	.	-1	-1	.	0
chr1	88428756	88429240	static	Peak_1417	chr1	88429010	88429426	1623	230
chr1	88478807	88479644	static	Peak_1418	chr1	88478394	88479607	1624	800
chr1	88491874	88492475	static	Peak_1419	chr1	88491891	88492576	1626	584
chr1	88496566	88497000	static	Peak_1420	chr1	88496801	88496970	1629	169
chr1	88504566	88505128	static	Peak_1421	chr1	88504533	88504955	1630	389
chr1	88515156	88515582	static	Peak_1422	chr1	88515179	88515280	1631	101
chr1	88530063	88530364	static	Peak_1423	chr1	88530096	88530268	1632	172
chr1	88531252	88531556	static	Peak_1424	.	-1	-1	.	0
chr1	88566195	88566537	static	Peak_1425	.	-1	-1	.	0
chr1	88567115	88567501	static	Peak_1426	.	-1	-1	.	0
chr1	88600181	88600440	dDHS_open	Peak_1427	chr1	88599981	88600754	1636	259
chr1	88608631	88609197	static	Peak_1428	chr1	88608676	88608905	1637	229
chr1	88609508	88610129	static	Peak_1429	chr1	88609694	88610156	1638	435
chr1	88614615	88614882	static	Peak_1430	.	-1	-1	.	0
chr1	88643752	88643976	static	Peak_1431	.	-1	-1	.	0
chr1	88755497	88755697	static	Peak_1432	chr1	88755522	88755734	1639	175
chr1	88775359	88776560	static	Peak_1433	chr1	88776158	88776461	1640	303
chr1	88829691	88830082	static	Peak_1434	.	-1	-1	.	0
chr1	88848290	88848863	static	Peak_1435	chr1	88848454	88848700	1641	246
chr1	88916263	88917029	static	Peak_1436	chr1	88916586	88916930	1642	344
chr1	88920081	88920400	dDHS_close	Peak_1437	chr1	88919984	88920375	1643	294
chr1	88921441	88921960	dDHS_close	Peak_1438	chr1	88921558	88921926	1644	368
chr1	88925165	88925578	static	Peak_1439	chr1	88925276	88925619	1645	302
chr1	88928981	88929200	dDHS_close	Peak_1440	chr1	88928934	88929530	1646	219
chr1	88937494	88937730	static	Peak_1441	.	-1	-1	.	0
chr1	88938543	88938910	static	Peak_1442	.	-1	-1	.	0
chr1	89070702	89070918	static	Peak_1443	chr1	89070579	89070741	1647	39
chr1	89070934	89071215	static	Peak_1444	chr1	89071097	89071408	1648	118
chr1	89081538	89081738	static	Peak_1445	chr1	89081425	89081581	1649	43
chr1	89093879	89094295	static	Peak_1446	chr1	89093915	89094347	1650	380
chr1	89110103	89111047	static	Peak_1447	chr1	89109653	89111250	1651	944
chr1	89142930	89143209	static	Peak_1448	chr1	89142826	89143019	1654	89
chr1	89190656	89191506	static	Peak_1449	chr1	89191444	89191856	1656	62
chr1	89213204	89213684	static	Peak_1450	chr1	89213300	89213525	1657	225
chr1	89223007	89223903	static	Peak_1451	chr1	89222928	89224273	1658	896
chr1	89236115	89236636	static	Peak_1452	.	-1	-1	.	0
chr1	89256875	89257075	static	Peak_1453	.	-1	-1	.	0
chr1	89277802	89278100	static	Peak_1454	.	-1	-1	.	0
chr1	89369285	89369540	static	Peak_1455	chr1	89368495	89369777	1659	255
chr1	89470292	89471801	static	Peak_1456	.	-1	-1	.	0
chr1	89504834	89505309	static	Peak_1457	chr1	89504973	89505366	1663	336
chr1	89652142	89653032	static	Peak_1458	chr1	89652319	89653104	1666	713
chr1	89660346	89660889	static	Peak_1459	chr1	89660287	89660946	1667	543
chr1	89668338	89668753	static	Peak_1460	chr1	89668386	89668753	1668	367
chr1	89669961	89670285	static	Peak_1461	chr1	89669771	89670196	1669	235
chr1	89676321	89676540	dDHS_open	Peak_1462	.	-1	-1	.	0
chr1	89695121	89695420	dDHS_open	Peak_1463	chr1	89694906	89695326	1671	205
chr1	89749465	89750176	static	Peak_1464	chr1	89749651	89750129	1673	478
chr1	89776188	89776850	static	Peak_1465	chr1	89776170	89776823	1674	635
chr1	89787559	89787925	static	Peak_1466	chr1	89787577	89787919	1676	342
chr1	89788242	89788442	static	Peak_1467	chr1	89788218	89788578	1677	200
chr1	89789154	89789546	static	Peak_1468	chr1	89789112	89789491	1678	337
chr1	89790834	89791104	static	Peak_1469	chr1	89790876	89791105	1679	228
chr1	89797403	89798106	static	Peak_1470	chr1	89797494	89798000	1680	506
chr1	89802970	89803414	static	Peak_1471	chr1	89803011	89803409	1681	398
chr1	89805277	89805721	static	Peak_1472	.	-1	-1	.	0
chr1	89819275	89819476	static	Peak_1473	.	-1	-1	.	0
chr1	89821522	89822017	static	Peak_1474	chr1	89821400	89821921	1682	399
chr1	89904116	89905324	static	Peak_1475	chr1	89904315	89905192	1686	877
chr1	89910299	89911591	static	Peak_1476	chr1	89910274	89911655	1688	1292
chr1	89920709	89921042	static	Peak_1477	chr1	89920742	89921081	1690	300
chr1	89921240	89921853	static	Peak_1478	chr1	89921592	89921898	1691	261
chr1	89941472	89941695	static	Peak_1479	chr1	89941446	89941929	1694	223
chr1	89945619	89945819	static	Peak_1480	chr1	89945553	89946178	1696	200
chr1	89967012	89967572	static	Peak_1481	chr1	89967171	89967637	1697	401
chr1	89969241	89969680	dDHS_open	Peak_1482	chr1	89969062	89969612	1698	371
chr1	89970888	89971543	static	Peak_1483	chr1	89970898	89971386	1699	488
chr1	89999586	89999790	static	Peak_1484	chr1	89999541	89999859	1700	204
chr1	90002142	90002916	static	Peak_1485	chr1	90002292	90002685	1702	393
chr1	90059147	90059347	static	Peak_1486	chr1	90059342	90059575	1708	5
chr1	90062067	90063300	static	Peak_1487	.	-1	-1	.	0
chr1	90076059	90076694	static	Peak_1488	chr1	90076105	90076660	1712	555
chr1	90081462	90081766	static	Peak_1489	.	-1	-1	.	0
chr1	90092263	90092648	static	Peak_1490	chr1	90092336	90092601	1713	265
chr1	90103351	90103707	static	Peak_1491	chr1	90103458	90103809	1715	249
chr1	90166336	90166713	static	Peak_1492	.	-1	-1	.	0
chr1	90254136	90254336	static	Peak_1493	.	-1	-1	.	0
chr1	90302974	90303958	static	Peak_1494	chr1	90303052	90304022	1752	906
chr1	90315477	90316057	static	Peak_1495	chr1	90315565	90315963	1754	398
chr1	90321316	90321552	static	Peak_1496	chr1	90321325	90321498	1757	173
chr1	90388120	90388576	static	Peak_1497	.	-1	-1	.	0
chr1	90410711	90410993	static	Peak_1498	.	-1	-1	.	0
chr1	90456151	90456510	static	Peak_1499	.	-1	-1	.	0
chr1	90459043	90459243	static	Peak_1500	.	-1	-1	.	0
chr1	90463397	90463707	static	Peak_1501	.	-1	-1	.	0
chr1	90472534	90472809	static	Peak_1502	.	-1	-1	.	0
chr1	90483893	90484390	static	Peak_1503	chr1	90484098	90484285	1758	187
chr1	90598590	90598790	static	Peak_1504	.	-1	-1	.	0
chr1	90598894	90599111	static	Peak_1505	.	-1	-1	.	0
chr1	90602262	90602750	static	Peak_1506	chr1	90602419	90602823	1762	331
chr1	90645621	90645960	dDHS_close	Peak_1507	chr1	90645631	90646032	1763	329
chr1	90660401	90661260	dDHS_close	Peak_1508	chr1	90660434	90661267	1765	826
chr1	90757368	90758354	static	Peak_1509	.	-1	-1	.	0
chr1	90851209	90851919	static	Peak_1510	chr1	90851183	90851903	1766	694
chr1	90856123	90856612	static	Peak_1511	.	-1	-1	.	0
chr1	90872744	90873138	static	Peak_1512	.	-1	-1	.	0
chr1	90922457	90923055	static	Peak_1513	chr1	90922694	90922989	1767	295
chr1	90923064	90923278	static	Peak_1514	.	-1	-1	.	0
chr1	90966246	90967281	static	Peak_1515	chr1	90966198	90967314	1768	1035
chr1	90975165	90975384	static	Peak_1516	.	-1	-1	.	0
chr1	90975439	90975659	static	Peak_1517	.	-1	-1	.	0
chr1	91000273	91000490	static	Peak_1518	chr1	91000113	91000413	1769	140
chr1	91000833	91001473	static	Peak_1519	chr1	91000847	91001435	1770	588
chr1	91004237	91004442	static	Peak_1520	.	-1	-1	.	0
chr1	91183831	91184279	static	Peak_1521	chr1	91183781	91184067	1773	236
chr1	91350900	91351747	static	Peak_1522	chr1	91350459	91351731	1776	831
chr1	91353126	91353563	static	Peak_1523	chr1	91352008	91353720	1777	437
chr1	91370503	91370743	static	Peak_1524	chr1	91370403	91370836	1779	240
chr1	91392755	91393181	static	Peak_1525	chr1	91392758	91393260	1780	423
chr1	91412533	91412733	static	Peak_1526	chr1	91412416	91412934	1781	200
chr1	91421042	91421360	static	Peak_1527	chr1	91421021	91421228	1782	186
chr1	91451841	91452120	dDHS_close	Peak_1528	chr1	91451516	91452344	1784	279
chr1	91453784	91454514	static	Peak_1529	chr1	91454066	91454919	1785	448
chr1	91513879	91514317	static	Peak_1530	chr1	91513966	91514430	1786	351
chr1	91518458	91518856	static	Peak_1531	chr1	91518586	91519047	1788	270
chr1	91543021	91543260	dDHS_close	Peak_1532	chr1	91542717	91543676	1790	239
chr1	91548288	91548488	static	Peak_1533	.	-1	-1	.	0
chr1	91566041	91567339	static	Peak_1534	chr1	91566329	91567309	1791	980
chr1	91610755	91611772	static	Peak_1535	chr1	91610720	91611691	1793	936
chr1	91718964	91719748	static	Peak_1536	chr1	91719051	91719396	1795	345
chr1	91806416	91806899	static	Peak_1537	chr1	91806429	91806721	1797	292
chr1	91810256	91810505	static	Peak_1538	chr1	91810254	91810461	1798	205
chr1	91815769	91816034	static	Peak_1539	chr1	91815874	91816129	1799	160
chr1	91816079	91816289	static	Peak_1540	chr1	91815874	91816129	1799	50
chr1	91839837	91840044	static	Peak_1541	.	-1	-1	.	0
chr1	92131072	92131639	static	Peak_1542	chr1	92131116	92131544	1803	428
chr1	92291901	92292493	static	Peak_1543	chr1	92292026	92292187	1806	161
chr1	92301416	92302029	static	Peak_1544	chr1	92301387	92301862	1807	446
chr1	92305489	92306018	static	Peak_1545	chr1	92305515	92305705	1808	190
chr1	92386827	92387134	static	Peak_1546	chr1	92386875	92387257	1812	259
chr1	92489306	92489681	static	Peak_1547	.	-1	-1	.	0
chr1	92499550	92500360	static	Peak_1548	chr1	92499625	92500406	1815	735
chr1	92547461	92547880	dDHS_open	Peak_1549	chr1	92547357	92548109	1816	419
chr1	92609460	92609660	static	Peak_1550	.	-1	-1	.	0
chr1	92801455	92801780	static	Peak_1551	.	-1	-1	.	0
chr1	92864106	92864526	static	Peak_1552	.	-1	-1	.	0
chr1	92865915	92866339	static	Peak_1553	chr1	92865697	92866752	1824	424
chr1	92869830	92870332	static	Peak_1554	chr1	92869906	92870306	1825	400
chr1	92920711	92920911	static	Peak_1555	.	-1	-1	.	0
chr1	92949336	92950414	static	Peak_1556	chr1	92948956	92950913	1829	1078
chr1	92953786	92954301	static	Peak_1557	chr1	92953861	92954356	1830	440
chr1	92961394	92962124	static	Peak_1558	chr1	92961305	92962280	1833	730
chr1	92992049	92992606	static	Peak_1559	chr1	92992102	92992644	1835	504
chr1	92998125	92999016	static	Peak_1560	chr1	92997948	92999254	1837	891
chr1	93141521	93142100	dDHS_close	Peak_1561	chr1	93141541	93142062	1842	521
chr1	93146497	93147488	static	Peak_1562	chr1	93146497	93147547	1843	991
chr1	93147547	93147747	static	Peak_1563	.	-1	-1	.	0
chr1	93194572	93195149	static	Peak_1564	chr1	93194402	93195274	1845	577
chr1	93196555	93196922	static	Peak_1565	chr1	93196357	93197128	1847	367
chr1	93197829	93198728	static	Peak_1566	chr1	93197870	93198596	1848	726
chr1	93208417	93208622	static	Peak_1567	.	-1	-1	.	0
chr1	93208835	93209045	static	Peak_1568	chr1	93208904	93209160	1850	141
chr1	93213974	93214626	static	Peak_1569	chr1	93213430	93214649	1851	652
chr1	93277182	93277576	static	Peak_1570	.	-1	-1	.	0
chr1	93294830	93295786	static	Peak_1571	chr1	93294852	93295664	1855	812
chr1	93309673	93310509	static	Peak_1572	.	-1	-1	.	0
chr1	93310731	93311071	static	Peak_1573	.	-1	-1	.	0
chr1	93316821	93317620	dDHS_close	Peak_1574	chr1	93316593	93317819	1858	799
chr1	93325185	93325658	static	Peak_1575	chr1	93325287	93325650	1861	363
chr1	93332853	93333529	static	Peak_1576	chr1	93332239	93333799	1862	676
chr1	93336419	93336981	static	Peak_1577	chr1	93336034	93337181	1863	562
chr1	93339040	93339762	static	Peak_1578	chr1	93338407	93340000	1864	722
chr1	93342521	93343125	static	Peak_1579	chr1	93342430	93343743	1866	604
chr1	93352209	93353454	static	Peak_1580	chr1	93351819	93353629	1867	1245
chr1	93355161	93356520	dDHS_open	Peak_1581	chr1	93354726	93356618	1870	1359
chr1	93361132	93361439	static	Peak_1582	chr1	93360808	93361377	1872	245
chr1	93361834	93362229	static	Peak_1583	chr1	93361834	93362274	1873	395
chr1	93379862	93380406	static	Peak_1584	chr1	93379986	93380356	1874	370
chr1	93390975	93391497	static	Peak_1585	chr1	93390744	93391594	1875	522
chr1	93426784	93427333	static	Peak_1586	chr1	93426706	93427064	1878	280
chr1	93436306	93437470	static	Peak_1587	chr1	93436195	93437924	1879	1164
chr1	93718674	93719207	static	Peak_1588	chr1	93718669	93719188	1881	514
chr1	93720066	93720772	static	Peak_1589	chr1	93720126	93720864	1882	646
chr1	93768896	93769165	static	Peak_1590	chr1	93768983	93769272	1883	182
chr1	93771289	93771570	static	Peak_1591	chr1	93771234	93771530	1884	241
chr1	93779508	93780298	static	Peak_1592	chr1	93779676	93780079	1886	403
chr1	93790788	93791295	static	Peak_1593	chr1	93790372	93791271	1887	483
chr1	93799872	93800807	static	Peak_1594	chr1	93799872	93800704	1889	832
chr1	93817895	93818194	static	Peak_1595	chr1	93817939	93818116	1891	177
chr1	93885179	93885975	static	Peak_1596	chr1	93884977	93885822	1893	643
chr1	93912775	93913038	static	Peak_1597	.	-1	-1	.	0
chr1	93924729	93925095	static	Peak_1598	chr1	93924802	93925082	1894	280
chr1	93984202	93984568	static	Peak_1599	chr1	93984503	93984709	1895	65
chr1	93996892	93997703	static	Peak_1600	chr1	93996756	93997545	1897	653
chr1	94009738	94010083	static	Peak_1601	chr1	94009902	94010080	1898	178
chr1	94026919	94027454	static	Peak_1602	chr1	94026965	94027452	1899	487
chr1	94076662	94077602	static	Peak_1603	chr1	94076468	94077878	1902	940
chr1	94369989	94370868	static	Peak_1604	chr1	94370050	94370814	1904	764
chr1	94538217	94538772	static	Peak_1605	chr1	94538332	94538813	1905	440
chr1	94544489	94544689	static	Peak_1606	.	-1	-1	.	0
chr1	94591505	94591754	static	Peak_1607	.	-1	-1	.	0
chr1	94591886	94592124	static	Peak_1608	.	-1	-1	.	0
chr1	94593490	94593797	static	Peak_1609	chr1	94593507	94593724	1906	217
chr1	94605760	94606713	static	Peak_1610	chr1	94605657	94606711	1908	951
chr1	94606857	94607385	static	Peak_1611	chr1	94606870	94607418	1909	515
chr1	94614836	94615386	static	Peak_1612	chr1	94614715	94615144	1910	308
chr1	94620673	94621202	static	Peak_1613	chr1	94620678	94621149	1911	471
chr1	94727899	94728480	static	Peak_1614	chr1	94728217	94728479	1914	262
chr1	94730449	94730657	static	Peak_1615	chr1	94730604	94730825	1915	53
chr1	94730705	94730914	static	Peak_1616	chr1	94730604	94730825	1915	120
chr1	94798080	94798412	static	Peak_1617	chr1	94798020	94798718	1916	332
chr1	94803287	94804105	static	Peak_1618	chr1	94803265	94804885	1919	818
chr1	94807541	94807860	dDHS_open	Peak_1619	chr1	94807587	94808879	1922	273
chr1	94831261	94831480	dDHS_open	Peak_1620	chr1	94830562	94831603	1925	219
chr1	94840461	94840989	static	Peak_1621	chr1	94840029	94840825	1930	364
chr1	94925976	94926813	static	Peak_1622	chr1	94925797	94926931	1932	837
chr1	95019729	95020160	static	Peak_1623	chr1	95019782	95020111	1933	329
chr1	95020478	95021011	static	Peak_1624	chr1	95020297	95021194	1934	533
chr1	95024746	95025519	static	Peak_1625	chr1	95024455	95025695	1935	773
chr1	95029228	95029708	static	Peak_1626	chr1	95029157	95029882	1936	480
chr1	95031546	95032152	static	Peak_1627	chr1	95031333	95032595	1937	606
chr1	95034960	95035568	static	Peak_1628	chr1	95034982	95035597	1939	586
chr1	95039477	95039727	static	Peak_1629	chr1	95039473	95039802	1942	250
chr1	95042513	95043105	static	Peak_1630	chr1	95042923	95043040	1943	117
chr1	95057418	95057618	static	Peak_1631	.	-1	-1	.	0
chr1	95070836	95071299	static	Peak_1632	chr1	95071093	95071274	1945	181
chr1	95132067	95133012	static	Peak_1633	chr1	95131986	95133325	1950	945
chr1	95202161	95202620	static	Peak_1634	chr1	95202246	95202648	1952	374
chr1	95239321	95239540	dDHS_open	Peak_1635	chr1	95239238	95240519	1953	219
chr1	95328570	95329218	static	Peak_1636	chr1	95328704	95329025	1955	321
chr1	95341173	95342590	static	Peak_1637	chr1	95341389	95342560	1956	1171
chr1	95374639	95375918	static	Peak_1638	chr1	95374531	95376321	1959	1279
chr1	95408109	95409020	static	Peak_1639	chr1	95408012	95409240	1960	911
chr1	95426311	95426713	static	Peak_1640	.	-1	-1	.	0
chr1	95464326	95464544	static	Peak_1641	chr1	95464354	95464577	1962	190
chr1	95531974	95532916	static	Peak_1642	chr1	95531117	95533041	1963	942
chr1	95538461	95539080	dDHS_close	Peak_1643	chr1	95538625	95538934	1964	309
chr1	95565173	95565813	static	Peak_1644	chr1	95565338	95565804	1967	466
chr1	95574826	95575434	static	Peak_1645	chr1	95574974	95575309	1968	335
chr1	95582109	95582313	static	Peak_1646	chr1	95581982	95582265	1969	156
chr1	95583012	95583953	static	Peak_1647	chr1	95583073	95583899	1970	826
chr1	95584761	95585340	dDHS_close	Peak_1648	chr1	95584514	95585387	1971	579
chr1	95590022	95590973	static	Peak_1649	chr1	95590116	95590965	1972	849
chr1	95591661	95591958	static	Peak_1650	chr1	95591448	95591978	1973	297
chr1	95608247	95608680	static	Peak_1651	.	-1	-1	.	0
chr1	95618134	95618371	static	Peak_1652	.	-1	-1	.	0
chr1	95642834	95643201	static	Peak_1653	chr1	95642889	95643125	1975	236
chr1	95651060	95651934	static	Peak_1654	chr1	95650522	95652036	1976	874
chr1	95698316	95698832	static	Peak_1655	chr1	95698212	95698870	1977	516
chr1	95700162	95701205	static	Peak_1656	chr1	95700017	95701450	1978	1043
chr1	95721487	95722406	static	Peak_1657	chr1	95721238	95722319	1980	832
chr1	95931582	95932256	static	Peak_1658	chr1	95931879	95932228	1982	349
chr1	96934944	96935439	static	Peak_1659	chr1	96934898	96935561	1984	495
chr1	96944000	96944213	static	Peak_1660	.	-1	-1	.	0
chr1	97209762	97210705	static	Peak_1661	chr1	97209902	97211035	1985	803
chr1	97347487	97347719	static	Peak_1662	.	-1	-1	.	0
chr1	97348410	97348669	static	Peak_1663	chr1	97348428	97348802	1987	241
chr1	98698298	98698498	static	Peak_1664	.	-1	-1	.	0
chr1	98780268	98780667	static	Peak_1665	.	-1	-1	.	0
chr1	99495661	99496020	dDHS_close	Peak_1666	chr1	99495540	99495989	1991	328
chr1	99499738	99499938	static	Peak_1667	.	-1	-1	.	0
chr1	99504185	99504385	static	Peak_1668	.	-1	-1	.	0
chr1	99557197	99557890	static	Peak_1669	.	-1	-1	.	0
chr1	99558130	99559105	static	Peak_1670	.	-1	-1	.	0
chr1	99585341	99585623	static	Peak_1671	.	-1	-1	.	0
chr1	99665797	99666146	static	Peak_1672	chr1	99665769	99667454	1996	349
chr1	99666275	99667334	static	Peak_1673	chr1	99665769	99667454	1996	1059
chr1	99667558	99667963	static	Peak_1674	chr1	99667745	99668003	1997	218
chr1	99873760	99873964	static	Peak_1675	chr1	99873441	99873971	1999	204
chr1	99890594	99891103	static	Peak_1676	chr1	99890612	99891063	2000	451
chr1	99991775	99992392	static	Peak_1677	chr1	99991521	99992875	2001	617
chr1	100462166	100462443	static	Peak_1678	.	-1	-1	.	0
chr1	100482975	100483429	static	Peak_1679	.	-1	-1	.	0
chr1	100610572	100610790	static	Peak_1680	.	-1	-1	.	0
chr1	100630248	100630730	static	Peak_1681	.	-1	-1	.	0
chr1	100689930	100690357	static	Peak_1682	.	-1	-1	.	0
chr1	101402700	101402932	static	Peak_1683	.	-1	-1	.	0
chr1	101997691	101998031	static	Peak_1684	.	-1	-1	.	0
chr1	102076698	102076899	static	Peak_1685	chr1	102076635	102076908	2003	201
chr1	102109648	102110040	static	Peak_1686	.	-1	-1	.	0
chr1	102115862	102116180	static	Peak_1687	.	-1	-1	.	0
chr1	102194818	102195544	static	Peak_1688	.	-1	-1	.	0
chr1	102278349	102279127	static	Peak_1689	chr1	102278323	102279275	2004	778
chr1	102281822	102282047	static	Peak_1690	chr1	102281675	102282140	2005	225
chr1	102307141	102307640	dDHS_close	Peak_1691	chr1	102307132	102307618	2006	477
chr1	102393313	102393758	static	Peak_1692	chr1	102393388	102393660	2007	272
chr1	102445816	102446036	static	Peak_1693	.	-1	-1	.	0
chr1	102446114	102446377	static	Peak_1694	chr1	102446199	102446473	2008	178
chr1	102447901	102448220	dDHS_close	Peak_1695	chr1	102447701	102448306	2009	319
chr1	102448529	102448995	static	Peak_1696	chr1	102448557	102449007	2010	438
chr1	102551676	102552265	static	Peak_1697	.	-1	-1	.	0
chr1	102579243	102580074	static	Peak_1698	.	-1	-1	.	0
chr1	102603467	102604023	static	Peak_1699	chr1	102603516	102604032	2012	507
chr1	102604224	102604424	static	Peak_1700	.	-1	-1	.	0
chr1	102606472	102606779	static	Peak_1701	.	-1	-1	.	0
chr1	104414161	104414960	dDHS_close	Peak_1702	chr1	104414563	104414966	2013	397
chr1	104457403	104457928	static	Peak_1703	chr1	104457834	104458222	2014	94
chr1	104457996	104458461	static	Peak_1704	chr1	104457834	104458222	2014	226
chr1	104623979	104624713	static	Peak_1705	.	-1	-1	.	0
chr1	104630581	104630780	dDHS_close	Peak_1706	chr1	104630615	104630919	2016	165
chr1	104630801	104631000	dDHS_close	Peak_1707	chr1	104630615	104630919	2016	118
chr1	104632061	104632320	dDHS_close	Peak_1708	chr1	104632014	104632254	2017	193
chr1	104638934	104639390	static	Peak_1709	.	-1	-1	.	0
chr1	105658099	105659209	static	Peak_1710	chr1	105658676	105659563	2019	533
chr1	106501754	106502277	static	Peak_1711	chr1	106501932	106502250	2020	318
chr1	106835736	106836093	static	Peak_1712	chr1	106835765	106836027	2021	262
chr1	106882933	106883294	static	Peak_1713	.	-1	-1	.	0
chr1	106938318	106938727	static	Peak_1714	.	-1	-1	.	0
chr1	106989236	106989575	static	Peak_1715	.	-1	-1	.	0
chr1	107009307	107010032	static	Peak_1716	chr1	107008989	107010079	2022	725
chr1	107011317	107011847	static	Peak_1717	chr1	107011247	107012310	2023	530
chr1	107075284	107076297	static	Peak_1718	chr1	107075227	107076660	2025	1013
chr1	107096037	107096608	static	Peak_1719	chr1	107095990	107096240	2026	203
chr1	107198018	107198335	static	Peak_1720	.	-1	-1	.	0
chr1	107202056	107202336	static	Peak_1721	.	-1	-1	.	0
chr1	107213628	107213833	static	Peak_1722	chr1	107213678	107213847	2027	155
chr1	107226418	107226835	static	Peak_1723	.	-1	-1	.	0
chr1	107252777	107253931	static	Peak_1724	chr1	107252581	107253863	2028	1086
chr1	107280800	107281552	static	Peak_1725	chr1	107280829	107281576	2030	723
chr1	107310223	107310447	static	Peak_1726	.	-1	-1	.	0
chr1	107338860	107339260	static	Peak_1727	.	-1	-1	.	0
chr1	107559836	107560765	static	Peak_1728	chr1	107559751	107561230	2031	929
chr1	107577205	107577438	static	Peak_1729	.	-1	-1	.	0
chr1	107583602	107583972	static	Peak_1730	.	-1	-1	.	0
chr1	107591957	107592665	static	Peak_1731	.	-1	-1	.	0
chr1	107607737	107608079	static	Peak_1732	.	-1	-1	.	0
chr1	107614846	107615531	static	Peak_1733	chr1	107615009	107615251	2032	242
chr1	107634750	107635016	static	Peak_1734	.	-1	-1	.	0
chr1	107643240	107643440	static	Peak_1735	.	-1	-1	.	0
chr1	107787724	107788201	static	Peak_1736	chr1	107787690	107788132	2034	408
chr1	107797032	107798026	static	Peak_1737	chr1	107796804	107798120	2035	994
chr1	107802801	107803300	dDHS_close	Peak_1738	chr1	107802487	107803362	2037	499
chr1	107804661	107804920	dDHS_close	Peak_1739	chr1	107804656	107805534	2038	259
chr1	107821330	107821749	static	Peak_1740	chr1	107821386	107822733	2039	363
chr1	107821954	107822905	static	Peak_1741	chr1	107821386	107822733	2039	779
chr1	107823182	107823830	static	Peak_1742	chr1	107823485	107823899	2041	345
chr1	107850355	107851238	static	Peak_1743	chr1	107850256	107851024	2042	669
chr1	107868144	107868977	static	Peak_1744	chr1	107868187	107868641	2044	454
chr1	107873941	107874420	dDHS_open	Peak_1745	chr1	107874079	107874627	2045	341
chr1	107877553	107878225	static	Peak_1746	chr1	107877700	107878173	2046	473
chr1	107886577	107887431	static	Peak_1747	.	-1	-1	.	0
chr1	107967949	107968159	static	Peak_1748	.	-1	-1	.	0
chr1	108051631	108052412	static	Peak_1749	chr1	108051746	108052160	2052	414
chr1	108067601	108068500	static	Peak_1750	.	-1	-1	.	0
chr1	108074679	108075098	static	Peak_1751	.	-1	-1	.	0
chr1	108089526	108090131	static	Peak_1752	chr1	108089400	108090090	2057	564
chr1	108097332	108097715	static	Peak_1753	chr1	108097467	108097662	2060	195
chr1	108128995	108129424	static	Peak_1754	chr1	108129055	108129375	2062	320
chr1	108130922	108131177	static	Peak_1755	.	-1	-1	.	0
chr1	108153577	108154334	static	Peak_1756	chr1	108153735	108154196	2064	461
chr1	108164639	108165090	static	Peak_1757	chr1	108164523	108164992	2065	353
chr1	108176599	108177356	static	Peak_1758	chr1	108176869	108177110	2066	241
chr1	108247655	108247860	static	Peak_1759	.	-1	-1	.	0
chr1	108599369	108599685	static	Peak_1760	chr1	108599363	108599802	2070	316
chr1	108599730	108599949	static	Peak_1761	chr1	108599363	108599802	2070	72
chr1	108610418	108611065	static	Peak_1762	chr1	108610486	108611031	2071	545
chr1	108623433	108623633	static	Peak_1763	.	-1	-1	.	0
chr1	108655930	108656824	static	Peak_1764	chr1	108655285	108656752	2072	822
chr1	108671310	108671797	static	Peak_1765	chr1	108671526	108671852	2075	271
chr1	108692866	108693674	static	Peak_1766	chr1	108692729	108693539	2076	673
chr1	109398679	109398943	static	Peak_1767	.	-1	-1	.	0
chr1	109480759	109480959	static	Peak_1768	.	-1	-1	.	0
chr1	109486164	109486907	static	Peak_1769	chr1	109486211	109487032	2078	696
chr1	109510489	109511145	static	Peak_1770	chr1	109510582	109511090	2079	508
chr1	109532621	109532827	static	Peak_1771	.	-1	-1	.	0
chr1	109534629	109535053	static	Peak_1772	chr1	109534664	109534942	2080	278
chr1	109536888	109537319	static	Peak_1773	chr1	109536802	109537210	2081	322
chr1	109679507	109679968	static	Peak_1774	.	-1	-1	.	0
chr1	109734400	109734649	static	Peak_1775	.	-1	-1	.	0
chr1	109813472	109814114	static	Peak_1776	chr1	109813669	109813922	2083	253
chr1	109833801	109834200	dDHS_close	Peak_1777	chr1	109833984	109834592	2084	216
chr1	109834856	109835118	static	Peak_1778	chr1	109834829	109835175	2085	262
chr1	109835950	109836581	static	Peak_1779	chr1	109836279	109836523	2086	244
chr1	109838487	109838763	static	Peak_1780	chr1	109838276	109838883	2087	276
chr1	109888569	109888981	static	Peak_1781	chr1	109888704	109889069	2088	277
chr1	109921369	109921569	static	Peak_1782	chr1	109921403	109921547	2089	144
chr1	111265801	111266200	dDHS_close	Peak_1783	chr1	111265922	111266317	2090	278
chr1	111269354	111269754	static	Peak_1784	.	-1	-1	.	0
chr1	111368311	111368613	static	Peak_1785	chr1	111368341	111368551	2091	210
chr1	112380041	112380289	static	Peak_1786	.	-1	-1	.	0
chr1	112689845	112690143	static	Peak_1787	.	-1	-1	.	0
chr1	112695843	112696248	static	Peak_1788	.	-1	-1	.	0
chr1	113760801	113761791	static	Peak_1789	chr1	113760739	113761780	2092	979
chr1	114844217	114844815	static	Peak_1790	.	-1	-1	.	0
chr1	116605309	116605560	static	Peak_1791	.	-1	-1	.	0
chr1	116721563	116721879	static	Peak_1792	.	-1	-1	.	0
chr1	116765086	116765432	static	Peak_1793	.	-1	-1	.	0
chr1	116772418	116772787	static	Peak_1794	.	-1	-1	.	0
chr1	120207463	120208238	static	Peak_1795	chr1	120207429	120208228	2097	765
chr1	120217942	120218911	static	Peak_1796	chr1	120217959	120218856	2098	897
chr1	120231415	120232443	static	Peak_1797	chr1	120231334	120232343	2099	928
chr1	120246421	120246840	dDHS_open	Peak_1798	chr1	120246515	120246917	2100	325
chr1	120255834	120256056	static	Peak_1799	.	-1	-1	.	0
chr1	120265458	120266158	static	Peak_1800	chr1	120265692	120266170	2101	466
chr1	120285115	120286151	static	Peak_1801	.	-1	-1	.	0
chr1	120356101	120356300	dDHS_open	Peak_1802	chr1	120355463	120356578	2103	199
chr1	120375932	120376236	static	Peak_1803	chr1	120375920	120376100	2105	168
chr1	120377585	120378315	static	Peak_1804	chr1	120377825	120378212	2106	387
chr1	120466351	120466552	static	Peak_1805	.	-1	-1	.	0
chr1	120491721	120492120	dDHS_close	Peak_1806	chr1	120491981	120492414	2109	139
chr1	120494304	120494722	static	Peak_1807	chr1	120494294	120494439	2110	135
chr1	120510017	120510897	static	Peak_1808	chr1	120510160	120510881	2111	721
chr1	120524094	120524785	static	Peak_1809	chr1	120524177	120525058	2112	608
chr1	120637813	120638207	static	Peak_1810	chr1	120637687	120638274	2115	394
chr1	120656196	120656481	static	Peak_1811	chr1	120656274	120656404	2116	130
chr1	120708741	120709020	dDHS_close	Peak_1812	chr1	120708753	120709425	2117	267
chr1	120863116	120863357	static	Peak_1813	chr1	120863060	120863271	2118	155
chr1	120863606	120864207	static	Peak_1814	chr1	120863588	120864151	2119	545
chr1	120864691	120864912	static	Peak_1815	chr1	120864482	120864904	2120	213
chr1	120918786	120919314	static	Peak_1816	chr1	120918860	120919189	2122	329
chr1	120984257	120984504	static	Peak_1817	chr1	120984264	120984506	2125	240
chr1	120990572	120990792	static	Peak_1818	.	-1	-1	.	0
chr1	121043277	121043712	static	Peak_1819	chr1	121043217	121043636	2126	359
chr1	121059969	121060735	static	Peak_1820	chr1	121059816	121060735	2127	766
chr1	121069770	121070560	static	Peak_1821	chr1	121069725	121070643	2128	790
chr1	121087740	121088186	static	Peak_1822	chr1	121087589	121088182	2129	442
chr1	121106209	121106783	static	Peak_1823	chr1	121106254	121106753	2130	499
chr1	121116362	121116908	static	Peak_1824	chr1	121116334	121116817	2132	455
chr1	121117375	121117978	static	Peak_1825	chr1	121117631	121118179	2133	347
chr1	121131026	121131525	static	Peak_1826	chr1	121130968	121131468	2135	442
chr1	121145344	121145720	static	Peak_1827	chr1	121145190	121145940	2137	376
chr1	121149839	121150477	static	Peak_1828	chr1	121149999	121150483	2138	478
chr1	121189241	121189500	dDHS_close	Peak_1829	chr1	121188738	121189557	2141	259
chr1	121190248	121190878	static	Peak_1830	chr1	121190159	121191048	2142	630
chr1	121191668	121192110	static	Peak_1831	chr1	121191417	121192211	2143	442
chr1	121198843	121199355	static	Peak_1832	chr1	121198811	121199322	2146	479
chr1	121376233	121376456	static	Peak_1833	.	-1	-1	.	0
chr1	121388701	121389020	dDHS_open	Peak_1834	chr1	121388612	121389166	2147	319
chr1	121400960	121401883	static	Peak_1835	chr1	121400753	121401957	2149	923
chr1	121415430	121415863	static	Peak_1836	chr1	121415486	121415679	2152	193
chr1	121422373	121423114	static	Peak_1837	.	-1	-1	.	0
chr1	121437547	121438037	static	Peak_1838	chr1	121437526	121438051	2156	490
chr1	121445540	121445771	static	Peak_1839	.	-1	-1	.	0
chr1	121448096	121448737	static	Peak_1840	chr1	121448238	121448504	2157	266
chr1	121454185	121455072	static	Peak_1841	chr1	121454442	121455071	2158	629
chr1	121461937	121462681	static	Peak_1842	chr1	121462068	121462650	2159	582
chr1	121486128	121486364	static	Peak_1843	.	-1	-1	.	0
chr1	121486578	121486969	static	Peak_1844	chr1	121486689	121486937	2160	248
chr1	121533722	121534384	static	Peak_1845	chr1	121533865	121534244	2161	379
chr1	121536679	121536912	static	Peak_1846	.	-1	-1	.	0
chr1	121544676	121545701	static	Peak_1847	chr1	121544895	121545821	2163	806
chr1	121563371	121564149	static	Peak_1848	chr1	121563523	121563886	2164	363
chr1	121571570	121571853	static	Peak_1849	.	-1	-1	.	0
chr1	121715410	121715610	static	Peak_1850	.	-1	-1	.	0
chr1	121733723	121734550	static	Peak_1851	chr1	121733704	121734516	2165	793
chr1	121791622	121791887	static	Peak_1852	chr1	121791660	121791878	2166	218
chr1	121803582	121804186	static	Peak_1853	chr1	121803871	121804180	2167	309
chr1	121809332	121810120	static	Peak_1854	chr1	121809514	121810137	2168	606
chr1	121893874	121894180	static	Peak_1855	.	-1	-1	.	0
chr1	121929656	121930122	static	Peak_1856	chr1	121929457	121930092	2171	436
chr1	121933668	121934457	static	Peak_1857	chr1	121933652	121934333	2172	665
chr1	121957118	121957623	static	Peak_1858	chr1	121957235	121957643	2174	388
chr1	121960661	121961145	static	Peak_1859	chr1	121960660	121961043	2176	382
chr1	121962605	121963150	static	Peak_1860	chr1	121962305	121963112	2177	507
chr1	121969388	121970846	static	Peak_1861	chr1	121969262	121970949	2179	1458
chr1	121989971	121990384	static	Peak_1862	chr1	121990083	121990409	2181	301
chr1	121994934	121995285	static	Peak_1863	chr1	121994932	121995161	2182	227
chr1	121996799	121997599	static	Peak_1864	chr1	121996999	121997529	2183	530
chr1	122012280	122013036	static	Peak_1865	chr1	122011998	122013260	2185	756
chr1	122016624	122017161	static	Peak_1866	.	-1	-1	.	0
chr1	122017228	122018335	static	Peak_1867	.	-1	-1	.	0
chr1	122021451	122021745	static	Peak_1868	chr1	122021437	122021868	2187	294
chr1	122032917	122033441	static	Peak_1869	.	-1	-1	.	0
chr1	122039200	122039540	static	Peak_1870	chr1	122039160	122039488	2189	288
chr1	122043812	122044065	static	Peak_1871	.	-1	-1	.	0
chr1	122161322	122162301	static	Peak_1872	chr1	122161259	122162408	2191	979
chr1	122166713	122167095	static	Peak_1873	chr1	122166523	122167200	2192	382
chr1	122224570	122224789	static	Peak_1874	.	-1	-1	.	0
chr1	122253916	122254373	static	Peak_1875	.	-1	-1	.	0
chr1	122260256	122260622	static	Peak_1876	.	-1	-1	.	0
chr1	122265349	122265923	static	Peak_1877	.	-1	-1	.	0
chr1	122424124	122424386	static	Peak_1878	.	-1	-1	.	0
chr1	122428487	122428706	static	Peak_1879	.	-1	-1	.	0
chr1	122482956	122483195	static	Peak_1880	.	-1	-1	.	0
chr1	122551401	122552220	dDHS_close	Peak_1881	chr1	122551396	122552160	2193	759
chr1	122674048	122674272	static	Peak_1882	.	-1	-1	.	0
chr1	122746021	122746420	dDHS_close	Peak_1883	chr1	122745903	122746341	2194	320
chr1	123077019	123077291	static	Peak_1884	.	-1	-1	.	0
chr1	123140541	123140740	dDHS_close	Peak_1885	chr1	123140252	123140866	2196	199
chr1	123172943	123173143	static	Peak_1886	.	-1	-1	.	0
chr1	123224217	123224826	static	Peak_1887	chr1	123223442	123225058	2197	609
chr1	123225985	123226573	static	Peak_1888	chr1	123225882	123226590	2198	588
chr1	123229061	123229280	dDHS_close	Peak_1889	chr1	123228934	123229813	2202	219
chr1	123230621	123230960	dDHS_close	Peak_1890	chr1	123230633	123230958	2203	325
chr1	123232257	123232807	static	Peak_1891	chr1	123232364	123233254	2204	443
chr1	123245429	123246430	static	Peak_1892	chr1	123245394	123246024	2205	595
chr1	123247561	123247820	dDHS_close	Peak_1893	chr1	123247066	123247720	2207	159
chr1	123286825	123287805	static	Peak_1894	chr1	123287076	123287566	2208	490
chr1	123293507	123294037	static	Peak_1895	.	-1	-1	.	0
chr1	123296896	123297311	static	Peak_1896	.	-1	-1	.	0
chr1	123327249	123328057	static	Peak_1897	chr1	123327461	123328528	2209	596
chr1	123370607	123370807	static	Peak_1898	.	-1	-1	.	0
chr1	123464141	123464968	static	Peak_1899	chr1	123464146	123464831	2210	685
chr1	124105381	124105687	static	Peak_1900	chr1	124105252	124105550	2211	169
chr1	124253581	124253780	dDHS_open	Peak_1901	chr1	124253654	124254002	2212	126
chr1	124253801	124254020	dDHS_open	Peak_1902	chr1	124253654	124254002	2212	201
chr1	124582001	124582803	static	Peak_1903	.	-1	-1	.	0
chr1	125830702	125831171	static	Peak_1904	.	-1	-1	.	0
chr1	125965421	125966000	dDHS_close	Peak_1905	chr1	125965441	125965652	2213	211
chr1	127293256	127293672	static	Peak_1906	chr1	127293433	127293621	2214	188
chr1	127317124	127317324	static	Peak_1907	.	-1	-1	.	0
chr1	127331938	127332753	static	Peak_1908	chr1	127331229	127333010	2216	815
chr1	127355190	127355748	static	Peak_1909	.	-1	-1	.	0
chr1	127367453	127368075	static	Peak_1910	.	-1	-1	.	0
chr1	127385968	127386279	static	Peak_1911	chr1	127385929	127386202	2217	234
chr1	127415619	127416297	static	Peak_1912	chr1	127415609	127416466	2218	678
chr1	127440716	127440930	static	Peak_1913	.	-1	-1	.	0
chr1	127448178	127448689	static	Peak_1914	chr1	127448246	127448499	2219	253
chr1	127456729	127457948	static	Peak_1915	.	-1	-1	.	0
chr1	127504157	127504525	static	Peak_1916	chr1	127504113	127504291	2221	134
chr1	127559693	127560049	static	Peak_1917	chr1	127559672	127560038	2222	345
chr1	127573341	127574170	static	Peak_1918	chr1	127573146	127574589	2224	829
chr1	127590167	127590509	static	Peak_1919	chr1	127590235	127590341	2225	106
chr1	127590623	127591494	static	Peak_1920	chr1	127590866	127591336	2226	470
chr1	127617878	127618078	static	Peak_1921	chr1	127617607	127618175	2229	200
chr1	127864341	127864860	dDHS_close	Peak_1922	chr1	127864363	127864859	2231	496
chr1	128197661	128198380	dDHS_close	Peak_1923	chr1	128197744	128198319	2233	575
chr1	128262788	128262992	static	Peak_1924	.	-1	-1	.	0
chr1	128263055	128263876	static	Peak_1925	chr1	128263317	128263673	2234	356
chr1	128304402	128304655	static	Peak_1926	.	-1	-1	.	0
chr1	128307851	128308435	static	Peak_1927	chr1	128308068	128308495	2236	367
chr1	128333654	128334237	static	Peak_1928	chr1	128333932	128334132	2237	200
chr1	128489276	128489500	static	Peak_1929	.	-1	-1	.	0
chr1	128489639	128490512	static	Peak_1930	chr1	128489582	128490512	2239	873
chr1	128500720	128501690	static	Peak_1931	chr1	128500928	128501501	2240	573
chr1	128568973	128569353	static	Peak_1932	.	-1	-1	.	0
chr1	128569801	128570100	dDHS_close	Peak_1933	chr1	128569811	128570260	2241	289
chr1	128634598	128635149	static	Peak_1934	.	-1	-1	.	0
chr1	128725640	128725840	static	Peak_1935	.	-1	-1	.	0
chr1	128726961	128727585	static	Peak_1936	chr1	128727009	128727505	2242	496
chr1	128907959	128908690	static	Peak_1937	chr1	128908158	128908357	2243	199
chr1	128942101	128942940	dDHS_close	Peak_1938	chr1	128942281	128942948	2244	659
chr1	129101353	129102063	static	Peak_1939	chr1	129101296	129102196	2245	710
chr1	129140855	129141294	static	Peak_1940	.	-1	-1	.	0
chr1	129166877	129167459	static	Peak_1941	.	-1	-1	.	0
chr1	129174667	129175213	static	Peak_1942	chr1	129174742	129175005	2248	263
chr1	129251601	129252660	dDHS_close	Peak_1943	chr1	129251643	129252599	2250	956
chr1	129260163	129260573	static	Peak_1944	chr1	129260242	129260614	2251	331
chr1	129293717	129294669	static	Peak_1945	chr1	129293914	129294542	2252	628
chr1	129294827	129295110	static	Peak_1946	chr1	129294769	129295223	2253	283
chr1	129315846	129316046	static	Peak_1947	.	-1	-1	.	0
chr1	129492260	129492756	static	Peak_1948	.	-1	-1	.	0
chr1	129504830	129505385	static	Peak_1949	.	-1	-1	.	0
chr1	129574154	129574391	static	Peak_1950	.	-1	-1	.	0
chr1	129599043	129599263	static	Peak_1951	.	-1	-1	.	0
chr1	129625602	129626163	static	Peak_1952	chr1	129625512	129626158	2257	556
chr1	129628862	129629510	static	Peak_1953	chr1	129628676	129629647	2259	648
chr1	129631863	129632268	static	Peak_1954	chr1	129631989	129632400	2260	279
chr1	129646908	129647690	static	Peak_1955	chr1	129647158	129647635	2262	477
chr1	129652319	129652750	static	Peak_1956	chr1	129652379	129652733	2263	354
chr1	129670136	129671271	static	Peak_1957	chr1	129669689	129671475	2264	1135
chr1	129724012	129724259	static	Peak_1958	.	-1	-1	.	0
chr1	129765071	129765931	static	Peak_1959	chr1	129765041	129765839	2266	768
chr1	129795717	129796516	static	Peak_1960	chr1	129796083	129796418	2267	335
chr1	129848863	129849210	static	Peak_1961	chr1	129848871	129849230	2268	339
chr1	129886464	129887076	static	Peak_1962	chr1	129886413	129886795	2269	331
chr1	129904977	129905399	static	Peak_1963	chr1	129905188	129905392	2271	204
chr1	129970557	129971060	static	Peak_1964	chr1	129970627	129970957	2273	330
chr1	129977505	129978532	static	Peak_1965	chr1	129977966	129978218	2275	252
chr1	129998936	130000230	static	Peak_1966	chr1	129998836	130000652	2277	1294
chr1	130131624	130132201	static	Peak_1967	chr1	130131701	130132103	2278	402
chr1	130140721	130140920	dDHS_close	Peak_1968	chr1	130140171	130141803	2279	199
chr1	130255887	130256693	static	Peak_1969	chr1	130255512	130256762	2280	806
chr1	130295570	130296064	static	Peak_1970	.	-1	-1	.	0
chr1	130313116	130314202	static	Peak_1971	chr1	130313146	130314515	2281	1056
chr1	130353586	130353983	static	Peak_1972	chr1	130353504	130353958	2282	372
chr1	130488619	130489370	static	Peak_1973	chr1	130488656	130489231	2285	575
chr1	130511457	130511729	static	Peak_1974	chr1	130511187	130511868	2286	272
chr1	130604329	130605145	static	Peak_1975	chr1	130604795	130605078	2289	283
chr1	130618759	130618966	static	Peak_1976	.	-1	-1	.	0
chr1	130621096	130621662	static	Peak_1977	.	-1	-1	.	0
chr1	130716285	130716695	static	Peak_1978	.	-1	-1	.	0
chr1	130722882	130723582	static	Peak_1979	chr1	130722676	130723785	2290	700
chr1	130728953	130729539	static	Peak_1980	chr1	130729079	130729479	2291	400
chr1	130874483	130874690	static	Peak_1981	.	-1	-1	.	0
chr1	131147116	131147904	static	Peak_1982	chr1	131147253	131147787	2292	534
chr1	131555810	131556010	static	Peak_1983	.	-1	-1	.	0
chr1	131784647	131784893	static	Peak_1984	chr1	131784497	131784933	2293	246
chr1	132206264	132206715	static	Peak_1985	chr1	132206402	132206644	2294	242
chr1	132268781	132268985	static	Peak_1986	.	-1	-1	.	0
chr1	132270001	132270340	dDHS_open	Peak_1987	chr1	132269956	132270590	2295	339
chr1	132270361	132270620	dDHS_open	Peak_1988	chr1	132269956	132270590	2295	229
chr1	132358975	132359465	static	Peak_1989	chr1	132358981	132359433	2298	452
chr1	132409429	132410027	static	Peak_1990	chr1	132409453	132409781	2300	328
chr1	132530612	132531165	static	Peak_1991	chr1	132530613	132530876	2301	263
chr1	132554561	132554940	dDHS_close	Peak_1992	chr1	132554578	132554874	2303	296
chr1	132557921	132558480	dDHS_close	Peak_1993	chr1	132557977	132558459	2304	482
chr1	132574891	132575641	static	Peak_1994	chr1	132574841	132575600	2306	709
chr1	132576399	132576827	static	Peak_1995	chr1	132576303	132577196	2307	428
chr1	132591773	132591995	static	Peak_1996	.	-1	-1	.	0
chr1	132612104	132612903	static	Peak_1997	.	-1	-1	.	0
[truncated: 55,056 more rows]

## Sheet: 5D_FHx vs F
Supplementary File 5D - FHx/Female Control liver DHS overlap with the set of 70,211 DHS. Merged list of 43,287 DHS regions was generated based on the MACS2 peaks called in each DNase-seq replicate sample (see Methods) and assigned a unique name (DHS Peak Number, column E). The genomic position of DHS region is listed in columns A-C, its DHS response in column D, and its overlapping DHS region in …
DHS Peaks (n = 43,287)					DHS regions (from reference set of 70,211 DHS)				The number of overlapping base pairs between the DHS regions.
Chrom	Start	End	DHS Response	DHS Peak Number	Chr	Start	Stop	DHS Peak Number	bp_overlap
chr1	3406189	3406562	static	Peak_1	chr1	3406266	3406483	1	217
chr1	3412957	3413270	static	Peak_2	chr1	3413183	3413552	2	87
chr1	3445617	3446034	static	Peak_3	.	-1	-1	.	0
chr1	3467476	3468194	static	Peak_4	chr1	3467754	3468166	4	412
chr1	3504661	3505280	dDHS_close	Peak_5	chr1	3504628	3505602	5	619
chr1	3541888	3542113	static	Peak_6	.	-1	-1	.	0
chr1	3576540	3576873	static	Peak_7	chr1	3576583	3576809	6	226
chr1	3595507	3596130	static	Peak_8	chr1	3595745	3596010	7	265
chr1	4416647	4417225	static	Peak_9	chr1	4416880	4417251	8	345
chr1	4503961	4504549	static	Peak_10	chr1	4504003	4504564	11	546
chr1	4534120	4534451	static	Peak_11	.	-1	-1	.	0
chr1	4561688	4562010	static	Peak_12	chr1	4561654	4562157	12	322
chr1	4607642	4607926	static	Peak_13	chr1	4607607	4607907	13	265
chr1	4651661	4651980	dDHS_open	Peak_14	chr1	4651774	4652240	15	206
chr1	4661223	4662159	static	Peak_15	chr1	4661316	4662219	17	843
chr1	4736995	4737237	static	Peak_16	chr1	4736913	4737219	18	224
chr1	4758581	4759615	static	Peak_17	chr1	4758414	4759705	19	1034
chr1	4774228	4774636	static	Peak_18	chr1	4774222	4774754	22	408
chr1	4775341	4775720	dDHS_open	Peak_19	chr1	4775405	4776273	23	315
chr1	4791636	4792354	static	Peak_20	chr1	4791594	4792418	24	718
chr1	4797541	4797800	dDHS_open	Peak_21	chr1	4797439	4798383	25	259
chr1	4800510	4801015	static	Peak_22	chr1	4800413	4800947	27	437
chr1	4819329	4819682	static	Peak_23	chr1	4819359	4819687	28	323
chr1	4847941	4848240	dDHS_open	Peak_24	chr1	4847417	4848573	29	299
chr1	5072794	5073586	static	Peak_25	chr1	5072936	5073700	31	650
chr1	5248231	5248561	static	Peak_26	.	-1	-1	.	0
chr1	5264790	5265328	static	Peak_27	.	-1	-1	.	0
chr1	6204286	6205124	static	Peak_28	chr1	6203854	6205645	34	838
chr1	6500643	6501259	static	Peak_29	chr1	6500620	6500920	36	277
chr1	6986102	6986532	static	Peak_30	chr1	6986138	6986326	37	188
chr1	7078571	7079380	static	Peak_31	.	-1	-1	.	0
chr1	7079431	7079668	static	Peak_32	.	-1	-1	.	0
chr1	7079831	7080195	static	Peak_33	.	-1	-1	.	0
chr1	7090750	7090985	static	Peak_34	.	-1	-1	.	0
chr1	7387601	7387960	dDHS_open	Peak_35	chr1	7387004	7388684	40	359
chr1	8044759	8045105	static	Peak_36	chr1	8044741	8045168	41	346
chr1	8631748	8632092	static	Peak_37	chr1	8631782	8632128	43	310
chr1	8812328	8812589	static	Peak_38	.	-1	-1	.	0
chr1	8862901	8863240	dDHS_close	Peak_39	chr1	8862805	8863267	44	339
chr1	9535119	9535669	static	Peak_40	chr1	9534966	9536379	45	550
chr1	9537752	9538507	static	Peak_41	chr1	9537821	9539305	47	686
chr1	9554079	9554811	static	Peak_42	chr1	9553797	9554443	52	364
chr1	9555232	9555483	static	Peak_43	chr1	9555226	9555552	54	251
chr1	9574657	9575265	static	Peak_44	chr1	9574750	9575210	56	460
chr1	9611533	9612101	static	Peak_45	chr1	9611385	9612309	57	568
chr1	9620311	9620707	static	Peak_46	.	-1	-1	.	0
chr1	9621352	9622017	static	Peak_47	.	-1	-1	.	0
chr1	9629141	9629380	dDHS_open	Peak_48	chr1	9628731	9629371	60	230
chr1	9690267	9690936	static	Peak_49	chr1	9689696	9691271	62	669
chr1	9738273	9739045	static	Peak_50	chr1	9737357	9738977	65	704
chr1	9788061	9788340	dDHS_open	Peak_51	chr1	9787900	9788797	66	279
chr1	9813001	9813201	static	Peak_52	.	-1	-1	.	0
chr1	9838706	9838988	static	Peak_53	chr1	9838261	9838887	67	181
chr1	9883227	9883440	static	Peak_54	.	-1	-1	.	0
chr1	9897060	9897501	static	Peak_55	chr1	9897056	9897421	69	361
chr1	9933824	9934533	static	Peak_56	chr1	9933781	9934418	74	594
chr1	9937679	9938235	static	Peak_57	chr1	9937477	9938082	76	403
chr1	9971796	9971996	static	Peak_58	chr1	9971812	9972092	80	184
chr1	9979241	9979460	dDHS_close	Peak_59	chr1	9978661	9979421	81	180
chr1	10028101	10028460	dDHS_open	Peak_60	chr1	10027519	10028561	83	359
chr1	10029921	10030240	dDHS_open	Peak_61	chr1	10029511	10030531	84	319
chr1	10089796	10090000	static	Peak_62	.	-1	-1	.	0
chr1	10132917	10133342	static	Peak_63	chr1	10132909	10133326	86	409
chr1	10222894	10223566	static	Peak_64	chr1	10222120	10223601	89	672
chr1	10310340	10310690	static	Peak_65	.	-1	-1	.	0
chr1	10594207	10594548	static	Peak_66	chr1	10594304	10594480	90	176
chr1	10980892	10981286	static	Peak_67	chr1	10980815	10981309	92	394
chr1	10983128	10983803	static	Peak_68	chr1	10983119	10984109	93	675
chr1	11037115	11037334	static	Peak_69	chr1	11037154	11037374	96	180
chr1	12708401	12708795	static	Peak_70	chr1	12708240	12708883	98	394
chr1	13105674	13106010	static	Peak_71	chr1	13105724	13105984	99	260
chr1	13106480	13106746	static	Peak_72	chr1	13106332	13106532	100	52
chr1	13116004	13116206	static	Peak_73	.	-1	-1	.	0
chr1	13161165	13161446	static	Peak_74	chr1	13161281	13161510	101	165
chr1	13161473	13161673	static	Peak_75	chr1	13161281	13161510	101	37
chr1	13193717	13194164	static	Peak_76	chr1	13193360	13194083	102	366
chr1	13231287	13231925	static	Peak_77	chr1	13231439	13231785	104	346
chr1	13362741	13363080	dDHS_open	Peak_78	.	-1	-1	.	0
chr1	13364073	13364620	static	Peak_79	.	-1	-1	.	0
chr1	13416377	13417044	static	Peak_80	chr1	13416474	13417271	114	570
chr1	13427757	13428314	static	Peak_81	chr1	13427808	13428051	115	243
chr1	13456984	13457803	static	Peak_82	chr1	13456977	13457583	117	599
chr1	13477961	13478400	dDHS_close	Peak_83	chr1	13477835	13478575	118	439
chr1	13551534	13552068	static	Peak_84	chr1	13551578	13552036	120	458
chr1	13564949	13565511	static	Peak_85	chr1	13564871	13565403	121	454
chr1	13566642	13566889	static	Peak_86	chr1	13566547	13567111	123	247
chr1	13579622	13580368	static	Peak_87	chr1	13579082	13580391	124	746
chr1	13618579	13618779	static	Peak_88	chr1	13618387	13618676	125	97
chr1	13636665	13636865	static	Peak_89	chr1	13636607	13636794	129	129
chr1	13646318	13646523	static	Peak_90	chr1	13646247	13646653	130	205
chr1	13648742	13649225	static	Peak_91	chr1	13648717	13649245	132	483
chr1	13649940	13650165	static	Peak_92	chr1	13649975	13651025	134	190
chr1	13650212	13650958	static	Peak_93	chr1	13649975	13651025	134	746
chr1	13658679	13659221	static	Peak_94	chr1	13658706	13658980	135	274
chr1	13659581	13660025	static	Peak_95	chr1	13659716	13660019	136	303
chr1	13667741	13668040	dDHS_close	Peak_96	chr1	13667694	13668289	137	299
chr1	13668642	13668863	static	Peak_97	chr1	13668645	13668794	138	149
chr1	13689498	13689700	static	Peak_98	.	-1	-1	.	0
chr1	13689755	13690102	static	Peak_99	chr1	13689727	13690098	141	343
chr1	13696289	13696618	static	Peak_100	.	-1	-1	.	0
chr1	13705910	13706301	static	Peak_101	.	-1	-1	.	0
chr1	14785354	14785594	static	Peak_102	chr1	14785165	14785518	143	164
chr1	15598181	15598680	dDHS_close	Peak_103	chr1	15598335	15598956	144	345
chr1	15599583	15599814	static	Peak_104	chr1	15599570	15599954	145	231
chr1	15600660	15601115	static	Peak_105	chr1	15600641	15601088	147	428
chr1	15605696	15606177	static	Peak_106	chr1	15605727	15605971	148	244
chr1	15611952	15612233	static	Peak_107	.	-1	-1	.	0
chr1	15741283	15741483	static	Peak_108	.	-1	-1	.	0
chr1	15795472	15796776	static	Peak_109	chr1	15795316	15796771	149	1299
chr1	15807016	15807535	static	Peak_110	chr1	15806998	15807375	150	359
chr1	15823546	15823984	static	Peak_111	chr1	15823330	15823946	151	400
chr1	15867257	15867533	static	Peak_112	chr1	15867197	15867560	152	276
chr1	15987261	15987600	dDHS_close	Peak_113	chr1	15986937	15987673	154	339
chr1	16094121	16094400	dDHS_open	Peak_114	.	-1	-1	.	0
chr1	16101873	16102206	static	Peak_115	chr1	16101882	16102240	157	324
chr1	16162020	16162317	static	Peak_116	chr1	16162046	16162360	158	271
chr1	16189361	16189760	dDHS_close	Peak_117	chr1	16189260	16189759	161	398
chr1	16218246	16218949	static	Peak_118	chr1	16218027	16218779	162	533
chr1	16299113	16299489	static	Peak_119	.	-1	-1	.	0
chr1	16300017	16300425	static	Peak_120	chr1	16300098	16300404	163	306
chr1	16509084	16509455	static	Peak_121	chr1	16509099	16509477	164	356
chr1	16609036	16609690	static	Peak_122	chr1	16608656	16609818	166	654
chr1	16646561	16647140	dDHS_open	Peak_123	chr1	16646523	16647735	167	579
chr1	16655124	16655761	static	Peak_124	chr1	16655091	16655819	168	637
chr1	16678264	16678899	static	Peak_125	chr1	16678382	16678866	169	484
chr1	17087784	17088170	static	Peak_126	.	-1	-1	.	0
chr1	18960420	18960620	static	Peak_127	.	-1	-1	.	0
chr1	20048367	20048824	static	Peak_128	chr1	20048327	20048793	172	426
chr1	20059760	20060292	static	Peak_129	chr1	20059807	20060228	173	421
chr1	20122006	20122711	static	Peak_130	chr1	20121978	20122698	174	692
chr1	20471834	20472336	static	Peak_131	chr1	20471898	20472304	176	406
chr1	20608076	20608361	static	Peak_132	chr1	20608004	20608298	177	222
chr1	20643906	20644564	static	Peak_133	chr1	20643817	20644497	178	591
chr1	20748938	20749239	static	Peak_134	.	-1	-1	.	0
chr1	20810221	20810814	static	Peak_135	chr1	20809974	20810831	179	593
chr1	20929235	20929607	static	Peak_136	chr1	20929200	20929359	182	124
chr1	20941258	20941906	static	Peak_137	chr1	20941292	20942155	183	614
chr1	21049394	21050186	static	Peak_138	chr1	21049167	21050218	189	792
chr1	21058880	21059096	static	Peak_139	.	-1	-1	.	0
chr1	21060021	21060232	static	Peak_140	chr1	21059881	21060527	191	211
chr1	21069203	21069961	static	Peak_141	chr1	21068449	21070013	192	758
chr1	21070445	21070840	static	Peak_142	chr1	21070402	21070895	193	395
chr1	21088489	21088817	static	Peak_143	chr1	21088433	21088834	194	328
chr1	21091208	21091856	static	Peak_144	chr1	21090936	21091753	195	545
chr1	21114922	21115534	static	Peak_145	chr1	21114931	21115521	197	590
chr1	21122369	21123020	static	Peak_146	chr1	21122401	21122853	198	452
chr1	21156381	21156801	static	Peak_147	chr1	21156229	21156748	200	367
chr1	21208481	21209060	dDHS_open	Peak_148	chr1	21208515	21209167	201	545
chr1	21218841	21219460	dDHS_open	Peak_149	chr1	21218856	21219674	205	604
chr1	21221841	21222760	dDHS_open	Peak_150	chr1	21221797	21223110	207	919
chr1	21230761	21231040	dDHS_open	Peak_151	chr1	21230070	21230960	208	199
chr1	21236379	21236774	static	Peak_152	chr1	21236203	21236575	214	196
chr1	21242981	21243280	dDHS_close	Peak_153	chr1	21242798	21243392	217	299
chr1	21256651	21256904	static	Peak_154	.	-1	-1	.	0
chr1	21294772	21295144	static	Peak_155	chr1	21294301	21295099	228	327
chr1	21295401	21296000	dDHS_open	Peak_156	.	-1	-1	.	0
chr1	21310255	21310646	static	Peak_157	chr1	21310378	21310647	229	268
chr1	21314121	21314737	static	Peak_158	chr1	21314112	21314758	230	616
chr1	21316934	21317240	static	Peak_159	chr1	21316764	21317254	231	306
chr1	21521058	21521258	static	Peak_160	.	-1	-1	.	0
chr1	21820010	21820215	static	Peak_161	chr1	21820131	21820288	235	84
chr1	21866894	21867094	static	Peak_162	.	-1	-1	.	0
chr1	22106461	22107000	dDHS_close	Peak_163	chr1	22106538	22107596	236	462
chr1	22125704	22126090	static	Peak_164	.	-1	-1	.	0
chr1	22306059	22306259	static	Peak_165	.	-1	-1	.	0
chr1	22627695	22628270	static	Peak_166	chr1	22627701	22628044	240	343
chr1	23003351	23003887	static	Peak_167	chr1	23003482	23003908	243	405
chr1	23153178	23153725	static	Peak_168	chr1	23153388	23153694	244	306
chr1	23170401	23170600	dDHS_close	Peak_169	chr1	23170261	23171144	246	199
chr1	23189477	23189726	static	Peak_170	chr1	23189476	23189670	247	193
chr1	23194316	23194975	static	Peak_171	chr1	23194340	23195070	248	635
chr1	23209635	23209841	static	Peak_172	.	-1	-1	.	0
chr1	23260921	23261480	dDHS_open	Peak_173	chr1	23260912	23261491	251	559
chr1	23263021	23263220	dDHS_open	Peak_174	chr1	23262658	23264219	252	199
chr1	23272647	23273007	static	Peak_175	chr1	23272451	23272689	253	42
chr1	23328279	23328946	static	Peak_176	chr1	23327479	23328729	257	450
chr1	23389899	23390501	static	Peak_177	chr1	23389440	23390803	258	602
chr1	23418488	23418794	static	Peak_178	chr1	23418424	23418774	259	286
chr1	23487684	23488165	static	Peak_179	chr1	23487714	23488167	260	451
chr1	23491501	23491740	dDHS_close	Peak_180	chr1	23491439	23491893	261	239
chr1	23928901	23929100	dDHS_open	Peak_181	chr1	23928483	23929489	263	199
chr1	24011842	24012838	static	Peak_182	chr1	24012004	24012798	264	794
chr1	24106929	24107671	static	Peak_183	chr1	24106418	24108075	265	742
chr1	24114289	24115538	static	Peak_184	chr1	24114225	24115555	266	1249
chr1	24685081	24685520	dDHS_open	Peak_185	chr1	24685030	24686280	268	439
chr1	24757188	24757708	static	Peak_186	chr1	24757161	24757548	271	360
chr1	24800363	24800606	static	Peak_187	chr1	24800165	24800395	272	32
chr1	26299363	26299563	static	Peak_188	.	-1	-1	.	0
chr1	26743323	26743525	static	Peak_189	.	-1	-1	.	0
chr1	27940400	27941337	static	Peak_190	chr1	27940485	27941017	274	532
chr1	27941715	27941932	static	Peak_191	chr1	27941700	27941932	275	217
chr1	30837136	30837336	static	Peak_192	.	-1	-1	.	0
chr1	30840365	30840927	static	Peak_193	.	-1	-1	.	0
chr1	30858588	30859178	static	Peak_194	chr1	30858513	30859126	277	538
chr1	30867353	30867832	static	Peak_195	chr1	30867489	30867765	278	276
chr1	30930521	30930920	dDHS_open	Peak_196	chr1	30929659	30931230	279	399
chr1	30931528	30931890	static	Peak_197	chr1	30931407	30931672	280	144
chr1	30994261	30994480	dDHS_open	Peak_198	chr1	30994294	30994845	282	186
chr1	30994521	30994880	dDHS_open	Peak_199	chr1	30994294	30994845	282	324
chr1	31006581	31007280	dDHS_open	Peak_200	chr1	31005794	31007662	285	699
chr1	31072910	31073372	static	Peak_201	chr1	31072654	31073353	289	443
chr1	31074253	31074757	static	Peak_202	chr1	31074144	31074738	290	485
chr1	31075941	31076740	dDHS_open	Peak_203	chr1	31076037	31076875	291	703
chr1	31090631	31091293	static	Peak_204	chr1	31090628	31091252	292	621
chr1	31106801	31107280	dDHS_open	Peak_205	chr1	31107208	31107480	294	72
chr1	31129636	31130443	static	Peak_206	chr1	31129432	31130358	295	722
chr1	31150561	31154060	dDHS_open	Peak_207	chr1	31150634	31152167	296	1533
chr1	31170401	31171000	dDHS_open	Peak_208	.	-1	-1	.	0
chr1	31211101	31211480	dDHS_open	Peak_209	chr1	31210752	31211185	300	84
chr1	31415172	31415372	static	Peak_210	.	-1	-1	.	0
chr1	31848970	31849210	static	Peak_211	.	-1	-1	.	0
chr1	31850069	31850733	static	Peak_212	.	-1	-1	.	0
chr1	31850781	31851235	static	Peak_213	.	-1	-1	.	0
chr1	33131515	33131765	static	Peak_214	.	-1	-1	.	0
chr1	33153702	33154100	static	Peak_215	chr1	33153760	33154053	302	293
chr1	33720151	33720351	static	Peak_216	.	-1	-1	.	0
chr1	33776477	33777111	static	Peak_217	chr1	33776521	33777298	306	590
chr1	33790861	33791280	dDHS_close	Peak_218	chr1	33790844	33791910	307	419
chr1	33811921	33812405	static	Peak_219	chr1	33811859	33812516	310	484
chr1	33871022	33871594	static	Peak_220	chr1	33870808	33871934	312	572
chr1	33876211	33876486	static	Peak_221	chr1	33876125	33876338	313	127
chr1	33996647	33996847	static	Peak_222	chr1	33996691	33996998	314	156
chr1	33996857	33997063	static	Peak_223	chr1	33996691	33996998	314	141
chr1	34160566	34161042	static	Peak_224	chr1	34160567	34160965	316	398
chr1	34179961	34180340	dDHS_open	Peak_225	chr1	34179762	34180103	318	142
chr1	34224126	34224790	static	Peak_226	chr1	34224374	34224812	321	416
chr1	34293251	34293568	static	Peak_227	chr1	34293077	34293645	323	317
chr1	34294225	34295009	static	Peak_228	chr1	34294006	34295431	324	784
chr1	34367687	34367985	static	Peak_229	chr1	34367707	34368061	329	278
chr1	34444521	34445180	dDHS_close	Peak_230	chr1	34444336	34445175	330	654
chr1	34446260	34446491	static	Peak_231	.	-1	-1	.	0
chr1	34456666	34456866	static	Peak_232	chr1	34456561	34456807	331	141
chr1	34469277	34469477	static	Peak_233	chr1	34469205	34469647	332	200
chr1	34491410	34491912	static	Peak_234	chr1	34491473	34492096	333	439
chr1	34496241	34496720	dDHS_open	Peak_235	chr1	34495883	34497157	334	479
chr1	34516427	34516914	static	Peak_236	chr1	34516366	34516856	336	429
chr1	34899761	34900280	dDHS_open	Peak_237	chr1	34899309	34900343	341	519
chr1	34906636	34906849	static	Peak_238	chr1	34906591	34907055	342	213
chr1	35437656	35437955	static	Peak_239	chr1	35437529	35438111	344	299
chr1	35820921	35821240	dDHS_close	Peak_240	chr1	35820962	35821410	349	278
chr1	35893381	35893860	dDHS_close	Peak_241	chr1	35893280	35893878	353	479
chr1	35926411	35926757	static	Peak_242	chr1	35926255	35926886	356	346
chr1	35982928	35984190	static	Peak_243	chr1	35982623	35984183	360	1255
chr1	35990336	35990784	static	Peak_244	chr1	35990272	35990824	362	448
chr1	36004959	36005253	static	Peak_245	chr1	36004973	36005127	363	154
chr1	36122921	36123580	dDHS_close	Peak_246	chr1	36122350	36123804	366	659
chr1	36124565	36125296	static	Peak_247	.	-1	-1	.	0
chr1	36129762	36130671	static	Peak_248	chr1	36129492	36130889	370	909
chr1	36131857	36132299	static	Peak_249	chr1	36131686	36133197	372	442
chr1	36132581	36132780	dDHS_close	Peak_250	chr1	36131686	36133197	372	199
chr1	36158269	36158705	static	Peak_251	chr1	36157940	36158793	381	436
chr1	36166883	36167190	static	Peak_252	chr1	36166895	36167185	383	290
chr1	36300859	36301438	static	Peak_253	chr1	36300800	36301381	386	522
chr1	36311871	36312071	static	Peak_254	chr1	36312003	36312298	387	68
chr1	36312117	36312317	static	Peak_255	chr1	36312003	36312298	387	181
chr1	36321053	36321309	static	Peak_256	chr1	36321051	36321248	388	195
chr1	36330157	36330381	static	Peak_257	chr1	36330128	36330491	391	224
chr1	36360255	36360484	static	Peak_258	chr1	36360258	36360559	392	226
chr1	36364324	36365015	static	Peak_259	chr1	36364277	36365122	393	691
chr1	36373647	36373937	static	Peak_260	chr1	36373694	36373996	395	243
chr1	36413873	36414463	static	Peak_261	chr1	36413911	36414459	397	548
chr1	36425421	36426180	dDHS_open	Peak_262	chr1	36425705	36426287	399	475
chr1	36427695	36428189	static	Peak_263	chr1	36427832	36428052	400	220
chr1	36502044	36502367	static	Peak_264	chr1	36501803	36502345	401	301
chr1	36522490	36523077	static	Peak_265	chr1	36522546	36523068	402	522
chr1	36526758	36527055	static	Peak_266	chr1	36526669	36527449	403	297
chr1	36528051	36528773	static	Peak_267	chr1	36527943	36528983	404	722
chr1	36533387	36533587	static	Peak_268	chr1	36533346	36533565	405	178
chr1	36568861	36569200	dDHS_open	Peak_269	chr1	36568277	36569830	407	339
chr1	36570119	36570338	static	Peak_270	.	-1	-1	.	0
chr1	36582439	36582935	static	Peak_271	chr1	36582267	36582959	408	496
chr1	36583805	36584180	static	Peak_272	chr1	36583769	36584074	409	269
chr1	36593100	36593439	static	Peak_273	chr1	36592900	36593516	413	339
chr1	36596029	36596548	static	Peak_274	chr1	36596035	36596720	415	513
chr1	36603738	36604453	static	Peak_275	chr1	36603588	36604764	416	715
chr1	36614101	36614351	static	Peak_276	chr1	36613356	36614761	418	250
chr1	36661316	36661791	static	Peak_277	chr1	36661317	36661801	424	474
chr1	36748023	36748510	static	Peak_278	chr1	36747949	36748922	427	487
chr1	36766661	36767365	static	Peak_279	chr1	36766382	36767120	429	459
chr1	36837425	36838036	static	Peak_280	chr1	36837389	36838162	432	611
chr1	36839404	36839768	static	Peak_281	chr1	36838963	36839718	433	314
chr1	36841607	36841807	static	Peak_282	chr1	36841571	36841914	434	200
chr1	36918669	36918997	static	Peak_283	chr1	36918556	36918980	436	311
chr1	36931781	36932126	static	Peak_284	chr1	36931716	36932079	437	298
chr1	36959469	36959669	static	Peak_285	chr1	36959476	36959673	438	193
chr1	36971422	36971815	static	Peak_286	chr1	36971418	36971674	439	252
chr1	36977013	36977251	static	Peak_287	chr1	36977023	36977285	440	228
chr1	36985707	36986034	static	Peak_288	chr1	36985785	36986078	441	249
chr1	36996261	36996660	dDHS_open	Peak_289	chr1	36996229	36997090	443	399
chr1	37033506	37034121	static	Peak_290	chr1	37033650	37034126	444	471
chr1	37082698	37083511	static	Peak_291	chr1	37082096	37083509	445	811
chr1	37097900	37098543	static	Peak_292	chr1	37097920	37098572	447	623
chr1	37113783	37114035	static	Peak_293	chr1	37113759	37113918	448	135
chr1	37114141	37114460	dDHS_open	Peak_294	chr1	37114079	37114497	449	319
chr1	37356362	37357092	static	Peak_295	chr1	37356367	37357252	450	725
chr1	37398301	37399086	static	Peak_296	chr1	37398147	37399097	452	785
chr1	37404197	37404627	static	Peak_297	chr1	37404152	37404680	453	430
chr1	37407899	37408450	static	Peak_298	chr1	37407780	37408500	454	551
chr1	37417717	37418049	static	Peak_299	chr1	37417758	37418075	455	291
chr1	37486517	37487384	static	Peak_300	chr1	37486354	37487403	456	867
chr1	37921595	37922349	static	Peak_301	chr1	37921350	37922570	460	754
chr1	37928685	37929485	static	Peak_302	chr1	37928592	37929556	461	800
chr1	37934801	37935320	dDHS_close	Peak_303	chr1	37934620	37935276	462	475
chr1	37946868	37947561	static	Peak_304	chr1	37946871	37947587	463	690
chr1	38053621	38054000	dDHS_open	Peak_305	chr1	38053589	38055554	464	379
chr1	38054755	38054970	static	Peak_306	chr1	38053589	38055554	464	215
chr1	38088334	38088534	static	Peak_307	.	-1	-1	.	0
chr1	38166613	38167110	static	Peak_308	chr1	38166692	38166914	466	222
chr1	38175518	38175978	static	Peak_309	chr1	38175581	38175719	467	138
chr1	38181134	38181455	static	Peak_310	chr1	38181205	38181419	468	214
chr1	38186041	38187100	dDHS_open	Peak_311	chr1	38185747	38187236	469	1059
chr1	38232932	38233242	static	Peak_312	chr1	38233037	38233279	470	205
chr1	38298155	38299843	static	Peak_313	.	-1	-1	.	0
chr1	38365521	38365780	dDHS_close	Peak_314	chr1	38364786	38365885	474	259
chr1	38414935	38415194	static	Peak_315	.	-1	-1	.	0
chr1	38535018	38535448	static	Peak_316	chr1	38535138	38535487	476	310
chr1	38918576	38918784	static	Peak_317	chr1	38918571	38918821	477	208
chr1	39044082	39044946	static	Peak_318	chr1	39043923	39045007	478	864
chr1	39067674	39067887	static	Peak_319	chr1	39067622	39067820	479	146
chr1	39081994	39082468	static	Peak_320	chr1	39082113	39082285	480	172
chr1	39124821	39125160	dDHS_close	Peak_321	chr1	39124529	39125132	481	311
chr1	39159321	39159640	dDHS_close	Peak_322	chr1	39159355	39159735	482	285
chr1	39159801	39160140	dDHS_close	Peak_323	.	-1	-1	.	0
chr1	39162601	39163000	dDHS_close	Peak_324	chr1	39162427	39162878	483	277
chr1	39200475	39201016	static	Peak_325	chr1	39200532	39200825	485	293
chr1	39213612	39213957	static	Peak_326	chr1	39213626	39213916	486	290
chr1	39243879	39244315	static	Peak_327	.	-1	-1	.	0
chr1	39249521	39249740	dDHS_close	Peak_328	chr1	39249163	39250112	488	219
chr1	39261945	39262288	static	Peak_329	.	-1	-1	.	0
chr1	39341573	39341960	static	Peak_330	chr1	39341656	39341937	489	281
chr1	39342529	39342838	static	Peak_331	.	-1	-1	.	0
chr1	39345261	39345600	dDHS_close	Peak_332	chr1	39345350	39345603	490	250
chr1	39359092	39359489	static	Peak_333	chr1	39359195	39359468	491	273
chr1	39370243	39370443	static	Peak_334	chr1	39370275	39370450	492	168
chr1	39374619	39375105	static	Peak_335	chr1	39374827	39375106	493	278
chr1	39382094	39382435	static	Peak_336	chr1	39382221	39382378	494	157
chr1	39424577	39424782	static	Peak_337	chr1	39424412	39425398	495	205
chr1	39424843	39425043	static	Peak_338	chr1	39424412	39425398	495	200
chr1	39482401	39482740	dDHS_close	Peak_339	chr1	39482281	39482891	498	339
chr1	39490921	39491717	static	Peak_340	chr1	39491214	39491664	500	450
chr1	39502342	39502832	static	Peak_341	chr1	39502636	39502954	501	196
chr1	39509087	39509572	static	Peak_342	chr1	39509123	39509408	502	285
chr1	39515052	39515690	static	Peak_343	chr1	39514904	39515666	503	614
chr1	39535214	39536014	static	Peak_344	chr1	39534848	39535965	504	751
chr1	39572054	39572568	static	Peak_345	chr1	39572234	39572706	505	334
chr1	39592781	39593080	dDHS_open	Peak_346	chr1	39592148	39593124	509	299
chr1	39594296	39594660	static	Peak_347	chr1	39594348	39594800	510	312
chr1	39633972	39634656	static	Peak_348	chr1	39633348	39634687	511	684
chr1	39648521	39649444	static	Peak_349	chr1	39648480	39649399	513	878
chr1	39655567	39655919	static	Peak_350	chr1	39655634	39655927	514	285
chr1	39665191	39666028	static	Peak_351	chr1	39665130	39665662	515	471
chr1	39770766	39771522	static	Peak_352	chr1	39770647	39771511	519	745
chr1	39792774	39793252	static	Peak_353	chr1	39792737	39793398	521	478
chr1	39818667	39819232	static	Peak_354	chr1	39818828	39819184	523	356
chr1	39869981	39870400	dDHS_close	Peak_355	chr1	39869985	39870285	524	300
chr1	39926026	39926353	static	Peak_356	chr1	39925797	39926985	525	327
chr1	39926371	39927458	static	Peak_357	chr1	39925797	39926985	525	614
chr1	39959600	39960215	static	Peak_358	chr1	39959567	39960194	527	594
chr1	39993176	39993638	static	Peak_359	chr1	39993176	39993677	529	462
chr1	40056865	40057215	static	Peak_360	chr1	40056666	40057183	531	318
chr1	40142915	40143115	static	Peak_361	.	-1	-1	.	0
chr1	40172597	40172802	static	Peak_362	.	-1	-1	.	0
chr1	40173132	40173336	static	Peak_363	chr1	40173320	40173585	535	16
chr1	40181186	40181572	static	Peak_364	.	-1	-1	.	0
chr1	40196795	40197032	static	Peak_365	chr1	40196701	40197010	538	215
chr1	40206139	40206447	static	Peak_366	chr1	40206152	40206369	539	217
chr1	40212833	40213361	static	Peak_367	chr1	40212622	40213696	540	528
chr1	40220189	40220756	static	Peak_368	chr1	40219922	40220754	542	565
chr1	40220990	40221584	static	Peak_369	chr1	40220879	40221705	543	594
chr1	40228824	40229159	static	Peak_370	chr1	40228680	40229412	545	335
chr1	40232561	40233020	dDHS_close	Peak_371	chr1	40231732	40233173	546	459
chr1	40236393	40236759	static	Peak_372	chr1	40236332	40236959	547	366
chr1	40237638	40238062	static	Peak_373	chr1	40237781	40238014	548	233
chr1	40244751	40245022	static	Peak_374	chr1	40244687	40245231	549	271
chr1	40281665	40282173	static	Peak_375	chr1	40281258	40282274	555	508
chr1	40284603	40285071	static	Peak_376	chr1	40284598	40285212	557	468
chr1	40286627	40287058	static	Peak_377	chr1	40285950	40287026	558	399
chr1	40293810	40294036	static	Peak_378	chr1	40293477	40294208	560	226
chr1	40299577	40300096	static	Peak_379	chr1	40299557	40299948	561	371
chr1	40300314	40300613	static	Peak_380	chr1	40300363	40300825	562	250
chr1	40323113	40323580	static	Peak_381	chr1	40322962	40323891	564	467
chr1	40328447	40328709	static	Peak_382	chr1	40328441	40328772	565	262
chr1	40351864	40352064	static	Peak_383	.	-1	-1	.	0
chr1	40847338	40847701	static	Peak_384	chr1	40847204	40847737	570	363
chr1	41612372	41613086	static	Peak_385	chr1	41612445	41613149	573	641
chr1	41615937	41616612	static	Peak_386	chr1	41615911	41616549	574	612
chr1	41616851	41617127	static	Peak_387	chr1	41616897	41617268	575	230
chr1	41709510	41709970	static	Peak_388	chr1	41709503	41709883	576	373
chr1	41809301	41809716	static	Peak_389	chr1	41809378	41809674	577	296
chr1	42589798	42590013	static	Peak_390	chr1	42589553	42590168	578	215
chr1	42598833	42599221	static	Peak_391	chr1	42598990	42599164	579	174
chr1	42756501	42756824	static	Peak_392	.	-1	-1	.	0
chr1	42907762	42908506	static	Peak_393	chr1	42907766	42908578	582	740
chr1	43149266	43149705	static	Peak_394	chr1	43148422	43149843	583	439
chr1	43155009	43155774	static	Peak_395	chr1	43154987	43156018	584	765
chr1	43307120	43307523	static	Peak_396	chr1	43307169	43307574	586	354
chr1	43361997	43362699	static	Peak_397	chr1	43362118	43362550	589	432
chr1	43362829	43363049	static	Peak_398	chr1	43362894	43363111	590	155
chr1	43455801	43456420	dDHS_close	Peak_399	chr1	43455896	43456118	593	222
chr1	43542100	43542339	static	Peak_400	chr1	43542057	43542495	597	239
chr1	43542408	43542608	static	Peak_401	chr1	43542057	43542495	597	87
chr1	43591162	43591622	static	Peak_402	chr1	43591257	43591522	598	265
chr1	43884477	43885096	static	Peak_403	chr1	43883967	43885092	599	615
chr1	43990291	43991228	static	Peak_404	chr1	43990256	43991540	601	937
chr1	44072411	44072721	static	Peak_405	chr1	44072355	44072744	602	310
chr1	44159076	44159526	static	Peak_406	chr1	44158415	44159618	603	450
chr1	44175527	44176298	static	Peak_407	.	-1	-1	.	0
chr1	44176351	44176596	static	Peak_408	.	-1	-1	.	0
chr1	44186781	44187200	dDHS_close	Peak_409	chr1	44186816	44187311	605	384
chr1	44200678	44200884	static	Peak_410	chr1	44200548	44200881	607	203
chr1	44204530	44205065	static	Peak_411	chr1	44204273	44205207	608	535
chr1	44255115	44255461	static	Peak_412	chr1	44255165	44256001	609	296
chr1	45702228	45702474	static	Peak_413	chr1	45702214	45702488	614	246
chr1	45852001	45852380	dDHS_open	Peak_414	chr1	45851714	45852769	616	379
chr1	45894562	45894896	static	Peak_415	chr1	45894524	45894937	618	334
chr1	45917006	45917564	static	Peak_416	chr1	45917114	45917579	619	450
chr1	45922344	45922684	static	Peak_417	chr1	45922214	45922525	621	181
chr1	45925420	45925884	static	Peak_418	chr1	45925764	45925984	623	120
chr1	45938165	45938570	static	Peak_419	chr1	45938266	45938637	624	304
chr1	45954909	45955299	static	Peak_420	chr1	45954957	45955232	625	275
chr1	45961003	45961321	static	Peak_421	chr1	45960936	45961540	626	318
chr1	45961898	45962546	static	Peak_422	chr1	45961648	45962752	627	648
chr1	45977481	45977980	dDHS_close	Peak_423	chr1	45977477	45978243	631	499
chr1	45982721	45982920	dDHS_open	Peak_424	.	-1	-1	.	0
chr1	46910141	46910520	dDHS_open	Peak_425	chr1	46909387	46911372	636	379
chr1	48938271	48938558	static	Peak_426	.	-1	-1	.	0
chr1	49627790	49628169	static	Peak_427	chr1	49627788	49628116	637	326
chr1	49629393	49630016	static	Peak_428	chr1	49629448	49629745	638	297
chr1	50527279	50527834	static	Peak_429	chr1	50527546	50527759	639	213
chr1	50739549	50740420	static	Peak_430	chr1	50739713	50740448	640	707
chr1	50992306	50992666	static	Peak_431	chr1	50992166	50992668	642	360
chr1	51019222	51019470	static	Peak_432	.	-1	-1	.	0
chr1	51321839	51322567	static	Peak_433	chr1	51321932	51322547	643	615
chr1	51322835	51323166	static	Peak_434	chr1	51322789	51323165	644	330
chr1	51345608	51346184	static	Peak_435	chr1	51345572	51346374	645	576
chr1	51357198	51357614	static	Peak_436	chr1	51357127	51357603	648	405
chr1	51390594	51390848	static	Peak_437	.	-1	-1	.	0
chr1	51534741	51535020	dDHS_open	Peak_438	chr1	51534315	51535748	651	279
chr1	51565801	51566160	dDHS_open	Peak_439	chr1	51565982	51566315	653	178
chr1	51569158	51569889	static	Peak_440	chr1	51569079	51570249	654	731
chr1	51569942	51570187	static	Peak_441	chr1	51569079	51570249	654	245
chr1	51776936	51777560	static	Peak_442	chr1	51776861	51777543	659	607
chr1	51797572	51798251	static	Peak_443	chr1	51797415	51798345	661	679
chr1	51816384	51817110	static	Peak_444	chr1	51816445	51817014	662	569
chr1	51826743	51827347	static	Peak_445	chr1	51826539	51827361	664	604
chr1	51872146	51872346	static	Peak_446	chr1	51872182	51872363	666	164
chr1	51878307	51878756	static	Peak_447	chr1	51878433	51878752	667	319
chr1	51879419	51879719	static	Peak_448	chr1	51879313	51879656	668	237
chr1	51906442	51906968	static	Peak_449	chr1	51906479	51906970	669	489
chr1	51912548	51913318	static	Peak_450	chr1	51912585	51914119	670	733
chr1	51913395	51913843	static	Peak_451	chr1	51912585	51914119	670	448
chr1	51939518	51940492	static	Peak_452	chr1	51939451	51940517	672	974
chr1	51948857	51949092	static	Peak_453	chr1	51948875	51949633	674	217
chr1	51950826	51951157	static	Peak_454	chr1	51950494	51951373	675	331
chr1	51952760	51953413	static	Peak_455	chr1	51952712	51953510	676	653
chr1	51972550	51972947	static	Peak_456	chr1	51971868	51973365	678	397
chr1	51979654	51980115	static	Peak_457	chr1	51979767	51979961	679	194
chr1	52053749	52053949	static	Peak_458	chr1	52053636	52053942	680	193
chr1	52097593	52097812	static	Peak_459	.	-1	-1	.	0
chr1	52170328	52171151	static	Peak_460	chr1	52170260	52171007	682	679
chr1	52175838	52176713	static	Peak_461	chr1	52175919	52176872	683	794
chr1	52214856	52215057	static	Peak_462	.	-1	-1	.	0
chr1	52220568	52220812	static	Peak_463	chr1	52220611	52220863	686	201
chr1	52289831	52290547	static	Peak_464	chr1	52289219	52290642	687	716
chr1	52484904	52485241	static	Peak_465	chr1	52484854	52485269	688	337
chr1	52490911	52491308	static	Peak_466	chr1	52490975	52491199	689	224
chr1	52522540	52523127	static	Peak_467	chr1	52522654	52523198	690	473
chr1	52535262	52535509	static	Peak_468	.	-1	-1	.	0
chr1	52541007	52541220	static	Peak_469	chr1	52540906	52541164	692	157
chr1	52552488	52552892	static	Peak_470	chr1	52552435	52552775	693	287
chr1	52556595	52556826	static	Peak_471	chr1	52556387	52557922	694	231
chr1	52557171	52557773	static	Peak_472	chr1	52556387	52557922	694	602
chr1	52687191	52687840	static	Peak_473	chr1	52687313	52687784	697	471
chr1	52806810	52807367	static	Peak_474	chr1	52806829	52807249	699	420
chr1	52822706	52823027	static	Peak_475	chr1	52822666	52822919	700	213
chr1	52861906	52862244	static	Peak_476	chr1	52861878	52862213	702	307
chr1	52873332	52873532	static	Peak_477	.	-1	-1	.	0
chr1	52874126	52874835	static	Peak_478	chr1	52873566	52874837	703	709
chr1	52901517	52902253	static	Peak_479	chr1	52901548	52902572	704	705
chr1	52906312	52906798	static	Peak_480	chr1	52906268	52906939	706	486
chr1	53115974	53116300	static	Peak_481	chr1	53115626	53116513	707	326
chr1	53117300	53117659	static	Peak_482	chr1	53117257	53117704	708	359
chr1	53120790	53121073	static	Peak_483	.	-1	-1	.	0
chr1	53127341	53127920	dDHS_close	Peak_484	chr1	53127082	53127886	709	545
chr1	53142041	53142412	static	Peak_485	chr1	53142086	53142418	710	326
chr1	53150212	53150430	static	Peak_486	.	-1	-1	.	0
chr1	53348014	53348536	static	Peak_487	chr1	53348104	53348462	711	358
chr1	53353587	53354259	static	Peak_488	chr1	53353461	53354326	712	672
chr1	53357442	53357741	static	Peak_489	.	-1	-1	.	0
chr1	53370136	53370862	static	Peak_490	chr1	53370098	53370885	713	726
chr1	53409167	53409816	static	Peak_491	chr1	53409191	53409809	714	618
chr1	53841690	53842328	static	Peak_492	chr1	53841142	53842506	715	638
chr1	53880654	53880973	static	Peak_493	.	-1	-1	.	0
chr1	53902094	53902325	static	Peak_494	.	-1	-1	.	0
chr1	53907956	53908476	static	Peak_495	chr1	53908270	53908511	716	206
chr1	54031979	54032179	static	Peak_496	chr1	54031811	54032122	717	143
chr1	54035322	54035800	static	Peak_497	chr1	54035082	54035675	718	353
chr1	54062827	54063371	static	Peak_498	chr1	54062928	54063271	719	343
chr1	54074596	54074867	static	Peak_499	chr1	54074623	54075019	720	244
chr1	54307072	54307766	static	Peak_500	chr1	54307249	54307982	722	517
chr1	54495520	54495893	static	Peak_501	chr1	54495551	54496029	723	342
chr1	54580622	54581112	static	Peak_502	chr1	54580653	54580866	724	213
chr1	54599800	54600148	static	Peak_503	chr1	54599838	54600103	725	265
chr1	54602048	54602903	static	Peak_504	chr1	54601991	54602889	726	841
chr1	54609456	54609722	static	Peak_505	.	-1	-1	.	0
chr1	54614360	54614980	static	Peak_506	chr1	54613659	54615092	727	620
chr1	54671941	54672200	dDHS_close	Peak_507	chr1	54671523	54672339	728	259
chr1	54722891	54723091	static	Peak_508	.	-1	-1	.	0
chr1	54740974	54741574	static	Peak_509	chr1	54741087	54741894	729	487
chr1	54747519	54748005	static	Peak_510	chr1	54747507	54747803	730	284
chr1	54748178	54748378	static	Peak_511	.	-1	-1	.	0
chr1	54822708	54822981	static	Peak_512	chr1	54822721	54823139	734	260
chr1	54828201	54828670	static	Peak_513	chr1	54828363	54828631	735	268
chr1	54846288	54846669	static	Peak_514	.	-1	-1	.	0
chr1	54872271	54872565	static	Peak_515	chr1	54872210	54872565	736	294
chr1	54883287	54883896	static	Peak_516	chr1	54882945	54884060	738	609
chr1	54906835	54907130	static	Peak_517	chr1	54907008	54907314	742	122
chr1	54916867	54917129	static	Peak_518	chr1	54916848	54917043	744	176
chr1	54983047	54983310	static	Peak_519	chr1	54982696	54983540	747	263
chr1	55040324	55040742	static	Peak_520	chr1	55040221	55040775	748	418
chr1	55083861	55084200	dDHS_open	Peak_521	chr1	55083499	55084645	749	339
chr1	55109161	55109900	dDHS_open	Peak_522	chr1	55108941	55110385	751	739
chr1	55110171	55110371	static	Peak_523	chr1	55108941	55110385	751	200
chr1	55110455	55110655	static	Peak_524	chr1	55110535	55110714	752	120
chr1	55136519	55137029	static	Peak_525	chr1	55136533	55136946	753	413
chr1	55144241	55145000	dDHS_open	Peak_526	.	-1	-1	.	0
chr1	55145041	55145360	dDHS_open	Peak_527	.	-1	-1	.	0
chr1	55187661	55188180	dDHS_open	Peak_528	chr1	55187691	55188774	755	489
chr1	55188261	55188560	dDHS_open	Peak_529	chr1	55187691	55188774	755	299
chr1	55202568	55202768	static	Peak_530	chr1	55202522	55202689	756	121
chr1	55227955	55228776	static	Peak_531	chr1	55227831	55229045	757	821
chr1	55230447	55231240	static	Peak_532	chr1	55230206	55231364	758	793
chr1	55293750	55294412	static	Peak_533	chr1	55293784	55294496	759	628
chr1	55763605	55764257	static	Peak_534	chr1	55763876	55764255	764	379
chr1	56596649	56597327	static	Peak_535	chr1	56596578	56597327	768	678
chr1	57030081	57030440	dDHS_open	Peak_536	chr1	57028892	57030834	772	359
chr1	57030553	57030858	static	Peak_537	chr1	57028892	57030834	772	281
chr1	57030927	57032062	static	Peak_538	chr1	57031117	57031481	773	364
chr1	57036167	57036406	static	Peak_539	.	-1	-1	.	0
chr1	57398052	57398525	static	Peak_540	chr1	57398092	57398377	776	285
chr1	57425361	57425580	dDHS_open	Peak_541	chr1	57425294	57425549	777	188
chr1	57434233	57434569	static	Peak_542	chr1	57434191	57435070	779	336
chr1	57448060	57448640	static	Peak_543	chr1	57447913	57448625	780	565
chr1	57449253	57449646	static	Peak_544	chr1	57449325	57449916	781	321
chr1	57463421	57463960	dDHS_open	Peak_545	chr1	57462902	57464170	782	539
chr1	57493067	57493711	static	Peak_546	chr1	57493003	57493611	784	544
chr1	57546980	57547180	static	Peak_547	chr1	57546966	57547278	785	200
chr1	57782173	57782447	static	Peak_548	.	-1	-1	.	0
chr1	57799161	57799482	static	Peak_549	chr1	57799178	57799427	786	249
chr1	58026627	58027205	static	Peak_550	chr1	58026752	58027169	790	417
chr1	58052414	58052959	static	Peak_551	chr1	58052546	58053159	791	413
chr1	58086348	58086944	static	Peak_552	.	-1	-1	.	0
chr1	58087196	58087953	static	Peak_553	.	-1	-1	.	0
chr1	58128200	58128729	static	Peak_554	chr1	58127850	58129112	794	529
chr1	58134859	58135577	static	Peak_555	chr1	58134675	58135709	796	718
chr1	58149346	58149750	static	Peak_556	chr1	58149359	58149716	798	357
chr1	58154101	58154600	dDHS_close	Peak_557	chr1	58154239	58154580	799	341
chr1	58158358	58158943	static	Peak_558	chr1	58158302	58158945	800	585
chr1	58169545	58170205	static	Peak_559	chr1	58169758	58170560	801	447
chr1	58170886	58171201	static	Peak_560	chr1	58170836	58171233	802	315
chr1	58201321	58201580	dDHS_close	Peak_561	chr1	58200931	58202136	806	259
chr1	58398430	58398917	static	Peak_562	chr1	58398519	58398761	816	242
chr1	58410184	58410969	static	Peak_563	chr1	58410298	58410860	817	562
chr1	58449681	58450180	dDHS_open	Peak_564	chr1	58449436	58450393	820	499
chr1	58458282	58458619	static	Peak_565	chr1	58458290	58458596	822	306
chr1	58479692	58480080	static	Peak_566	chr1	58479758	58480020	823	262
chr1	58480432	58481186	static	Peak_567	chr1	58480310	58481217	824	754
chr1	58501950	58502504	static	Peak_568	chr1	58501963	58502670	826	541
chr1	58532517	58532906	static	Peak_569	chr1	58532529	58532875	827	346
chr1	58561562	58562299	static	Peak_570	chr1	58561435	58562085	828	523
chr1	58623461	58623722	static	Peak_571	.	-1	-1	.	0
chr1	58643121	58643620	dDHS_open	Peak_572	chr1	58642642	58643603	830	482
chr1	58667121	58667880	dDHS_close	Peak_573	chr1	58667041	58667837	832	716
chr1	58671284	58671909	static	Peak_574	chr1	58671347	58672313	833	562
chr1	58671953	58672219	static	Peak_575	chr1	58671347	58672313	833	266
chr1	58709546	58709761	static	Peak_576	chr1	58709312	58709847	835	215
chr1	58769057	58770213	static	Peak_577	.	-1	-1	.	0
chr1	58770623	58770925	static	Peak_578	.	-1	-1	.	0
chr1	58800101	58800449	static	Peak_579	chr1	58800231	58800361	845	130
chr1	58830905	58831105	static	Peak_580	chr1	58830851	58831064	848	159
chr1	58851921	58852120	dDHS_open	Peak_581	chr1	58851843	58852733	849	199
chr1	59008116	59008394	static	Peak_582	chr1	59008169	59008468	853	225
chr1	59014731	59015055	static	Peak_583	chr1	59014792	59015108	855	263
chr1	59029846	59031288	static	Peak_584	chr1	59029745	59031295	856	1442
chr1	59113975	59114177	static	Peak_585	.	-1	-1	.	0
chr1	59167351	59167678	static	Peak_586	chr1	59167386	59167821	858	292
chr1	59176496	59177099	static	Peak_587	chr1	59176481	59177203	859	603
chr1	59214671	59215046	static	Peak_588	chr1	59214733	59215033	860	300
chr1	59231147	59232221	static	Peak_589	chr1	59231376	59232192	861	816
chr1	59235261	59235620	dDHS_open	Peak_590	chr1	59235014	59235557	862	296
chr1	59257964	59258169	static	Peak_591	chr1	59257841	59258818	863	205
chr1	59258269	59258869	static	Peak_592	chr1	59257841	59258818	863	549
chr1	59259340	59259643	static	Peak_593	chr1	59259182	59259698	864	303
chr1	59265259	59265515	static	Peak_594	chr1	59265310	59265859	865	205
chr1	59268633	59269576	static	Peak_595	chr1	59268510	59269569	866	936
chr1	59293826	59294923	static	Peak_596	chr1	59293679	59295072	867	1097
chr1	59373708	59373908	static	Peak_597	chr1	59373699	59373924	868	200
chr1	59378501	59378780	dDHS_close	Peak_598	chr1	59378170	59380042	869	279
chr1	59425081	59425440	dDHS_close	Peak_599	chr1	59424845	59425387	873	306
chr1	59439701	59440480	dDHS_close	Peak_600	chr1	59439412	59440510	875	779
chr1	59442501	59443020	dDHS_close	Peak_601	chr1	59442557	59442885	876	328
chr1	59445801	59446680	dDHS_close	Peak_602	chr1	59445707	59446552	877	751
chr1	59452990	59453369	static	Peak_603	chr1	59453283	59453532	879	86
chr1	59460698	59461244	static	Peak_604	chr1	59460730	59460987	880	257
chr1	59470221	59470540	dDHS_close	Peak_605	chr1	59470048	59470560	881	319
chr1	59480481	59480780	dDHS_close	Peak_606	chr1	59480384	59481045	884	299
chr1	59493301	59493620	dDHS_close	Peak_607	chr1	59492977	59493936	887	319
chr1	59495988	59496366	static	Peak_608	chr1	59495946	59496939	888	378
chr1	59538473	59539232	static	Peak_609	.	-1	-1	.	0
chr1	59540587	59541117	static	Peak_610	.	-1	-1	.	0
chr1	59544254	59544579	static	Peak_611	chr1	59544125	59544759	891	325
chr1	59555187	59555607	static	Peak_612	chr1	59555144	59555288	892	101
chr1	59560517	59561362	static	Peak_613	chr1	59560485	59560980	893	463
chr1	59726913	59727413	static	Peak_614	chr1	59726801	59727220	896	307
chr1	59727555	59727886	static	Peak_615	chr1	59727443	59727894	897	331
chr1	59741901	59742120	dDHS_open	Peak_616	chr1	59741360	59742091	898	190
chr1	59819992	59820706	static	Peak_617	chr1	59819654	59821073	900	714
chr1	59821977	59822177	static	Peak_618	.	-1	-1	.	0
chr1	59861174	59861540	static	Peak_619	.	-1	-1	.	0
chr1	59959524	59959843	static	Peak_620	chr1	59959540	59959817	902	277
chr1	59969393	59969996	static	Peak_621	chr1	59969340	59970042	903	603
chr1	60154881	60155520	dDHS_open	Peak_622	chr1	60154292	60155639	905	639
chr1	60203884	60204115	static	Peak_623	chr1	60203797	60204073	906	189
chr1	60236856	60237781	static	Peak_624	chr1	60236878	60238178	908	903
chr1	60326261	60326461	static	Peak_625	chr1	60326275	60326418	909	143
chr1	60350941	60351220	dDHS_close	Peak_626	chr1	60350807	60351298	910	279
chr1	60399783	60400532	static	Peak_627	chr1	60399799	60400695	911	733
chr1	60402673	60402873	static	Peak_628	chr1	60402544	60402903	912	200
chr1	60466261	60466540	dDHS_open	Peak_629	chr1	60465960	60467061	913	279
chr1	60517724	60517924	static	Peak_630	chr1	60517591	60517822	914	98
chr1	60609267	60609544	static	Peak_631	.	-1	-1	.	0
chr1	60619925	60620444	static	Peak_632	chr1	60619936	60620220	915	284
chr1	60623581	60623960	dDHS_open	Peak_633	chr1	60622896	60624353	917	379
chr1	60628271	60628839	static	Peak_634	chr1	60628276	60628794	918	518
chr1	60652978	60653561	static	Peak_635	chr1	60653161	60654041	919	400
chr1	60655581	60655880	dDHS_open	Peak_636	chr1	60655648	60656570	921	232
chr1	60668755	60669087	static	Peak_637	chr1	60668860	60669199	924	227
chr1	60680325	60680564	static	Peak_638	chr1	60680376	60680625	925	188
chr1	60698091	60698624	static	Peak_639	chr1	60698159	60698701	927	465
chr1	60707146	60707362	static	Peak_640	chr1	60707043	60707328	929	182
chr1	60712175	60712674	static	Peak_641	chr1	60712084	60712880	931	499
chr1	60715921	60716217	static	Peak_642	chr1	60715323	60716152	934	231
chr1	60716350	60716901	static	Peak_643	chr1	60716412	60716839	935	427
chr1	60718689	60718999	static	Peak_644	chr1	60718641	60719745	936	310
chr1	60719142	60719717	static	Peak_645	chr1	60718641	60719745	936	575
chr1	60725081	60725380	dDHS_open	Peak_646	chr1	60724733	60725481	937	299
chr1	60725782	60726680	static	Peak_647	chr1	60725842	60726862	938	838
chr1	60791631	60792394	static	Peak_648	chr1	60791900	60792420	940	494
chr1	60878324	60878757	static	Peak_649	chr1	60878279	60878802	941	433
chr1	60881657	60881878	static	Peak_650	chr1	60881499	60882053	943	221
chr1	60883772	60884295	static	Peak_651	chr1	60883708	60884595	944	523
chr1	60903576	60904099	static	Peak_652	chr1	60903648	60904111	946	451
chr1	60916606	60917071	static	Peak_653	.	-1	-1	.	0
chr1	60919816	60920145	static	Peak_654	chr1	60919743	60920324	949	329
chr1	61017254	61017721	static	Peak_655	chr1	61017107	61017699	951	445
chr1	61238203	61238403	static	Peak_656	.	-1	-1	.	0
chr1	61430515	61431324	static	Peak_657	chr1	61430139	61431416	953	809
chr1	61893045	61893560	static	Peak_658	chr1	61893165	61893551	960	386
chr1	62221901	62222240	dDHS_close	Peak_659	chr1	62221668	62222232	961	331
chr1	62403131	62403513	static	Peak_660	chr1	62403223	62403440	962	217
chr1	62469474	62470087	static	Peak_661	chr1	62469537	62469917	963	380
chr1	62545613	62546328	static	Peak_662	.	-1	-1	.	0
chr1	62749961	62750300	dDHS_open	Peak_663	chr1	62749411	62750366	970	339
chr1	62753297	62753926	static	Peak_664	chr1	62752639	62754260	971	629
chr1	62770321	62770520	dDHS_close	Peak_665	.	-1	-1	.	0
chr1	62770561	62770760	dDHS_close	Peak_666	.	-1	-1	.	0
chr1	62771138	62772213	static	Peak_667	.	-1	-1	.	0
chr1	62777170	62777417	static	Peak_668	chr1	62777157	62777451	978	247
chr1	62781134	62781547	static	Peak_669	chr1	62781105	62781433	981	299
chr1	62794821	62795346	static	Peak_670	chr1	62794910	62795361	983	436
chr1	62856381	62856580	dDHS_close	Peak_671	chr1	62856136	62856783	991	199
chr1	62870102	62870762	static	Peak_672	chr1	62869617	62870880	994	660
chr1	62945967	62946384	static	Peak_673	chr1	62946003	62946260	997	257
chr1	62948664	62948867	static	Peak_674	.	-1	-1	.	0
chr1	63160261	63160800	dDHS_open	Peak_675	.	-1	-1	.	0
chr1	63170701	63171020	dDHS_open	Peak_676	chr1	63170337	63171249	1001	319
chr1	63176746	63176988	static	Peak_677	chr1	63176393	63177067	1002	242
chr1	63223181	63223840	dDHS_open	Peak_678	.	-1	-1	.	0
chr1	63228945	63229146	static	Peak_679	chr1	63228877	63229157	1006	201
chr1	63306553	63306790	static	Peak_680	.	-1	-1	.	0
chr1	63476947	63477546	static	Peak_681	chr1	63477207	63477613	1007	339
chr1	63776631	63777343	static	Peak_682	chr1	63776683	63777449	1012	660
chr1	64065264	64065582	static	Peak_683	chr1	64065316	64065644	1013	266
chr1	64087429	64087962	static	Peak_684	chr1	64087367	64088024	1015	533
chr1	64167866	64169283	static	Peak_685	chr1	64167467	64169328	1019	1417
chr1	64269239	64269542	static	Peak_686	.	-1	-1	.	0
chr1	64342174	64342499	static	Peak_687	.	-1	-1	.	0
chr1	64347945	64348603	static	Peak_688	chr1	64348036	64348675	1021	567
chr1	64351991	64352563	static	Peak_689	chr1	64351905	64352592	1023	572
chr1	64421023	64421652	static	Peak_690	chr1	64420911	64421658	1025	629
chr1	64578727	64579774	static	Peak_691	chr1	64578556	64579883	1027	1047
chr1	64663339	64664194	static	Peak_692	chr1	64663325	64664519	1029	855
chr1	64737084	64737671	static	Peak_693	chr1	64736949	64738160	1031	587
chr1	64783921	64784240	dDHS_open	Peak_694	.	-1	-1	.	0
chr1	64789207	64789821	static	Peak_695	chr1	64789087	64789831	1036	614
chr1	64799789	64800079	static	Peak_696	chr1	64799715	64800006	1037	217
chr1	64801165	64801595	static	Peak_697	chr1	64801130	64801612	1039	430
chr1	64834009	64834790	static	Peak_698	chr1	64834059	64834948	1042	731
chr1	64839278	64839601	static	Peak_699	chr1	64839000	64840076	1044	323
chr1	64839623	64839823	static	Peak_700	chr1	64839000	64840076	1044	200
chr1	64841829	64842272	static	Peak_701	chr1	64841875	64842237	1045	362
chr1	64906525	64906868	static	Peak_702	.	-1	-1	.	0
chr1	65137007	65137509	static	Peak_703	chr1	65137013	65137325	1048	312
chr1	65151301	65151840	dDHS_close	Peak_704	chr1	65151099	65151877	1049	539
chr1	65158630	65159819	static	Peak_705	chr1	65159183	65159965	1051	636
chr1	65201349	65201832	static	Peak_706	chr1	65201387	65201863	1053	445
chr1	65224093	65225200	static	Peak_707	.	-1	-1	.	0
chr1	65225506	65225983	static	Peak_708	.	-1	-1	.	0
chr1	65232679	65233428	static	Peak_709	chr1	65232702	65233711	1060	726
chr1	65359496	65359851	static	Peak_710	chr1	65359547	65359797	1061	250
chr1	65392652	65392865	static	Peak_711	chr1	65392600	65393002	1063	213
chr1	65452159	65452567	static	Peak_712	chr1	65452205	65452552	1066	347
chr1	65453968	65454168	static	Peak_713	chr1	65454023	65454407	1067	145
chr1	66147968	66148425	static	Peak_714	chr1	66147918	66148396	1069	428
chr1	66312426	66312882	static	Peak_715	.	-1	-1	.	0
chr1	66597500	66597831	static	Peak_716	chr1	66597493	66597708	1071	208
chr1	66717881	66718500	dDHS_close	Peak_717	chr1	66717925	66718575	1072	575
chr1	66747014	66747763	static	Peak_718	chr1	66746925	66748094	1073	749
chr1	66862906	66863169	static	Peak_719	.	-1	-1	.	0
chr1	66863181	66863420	dDHS_open	Peak_720	.	-1	-1	.	0
chr1	66863741	66864140	dDHS_open	Peak_721	.	-1	-1	.	0
chr1	66884951	66885425	static	Peak_722	.	-1	-1	.	0
chr1	66909047	66910053	static	Peak_723	chr1	66908881	66910165	1077	1006
chr1	66922528	66922909	static	Peak_724	.	-1	-1	.	0
chr1	66942633	66942833	static	Peak_725	.	-1	-1	.	0
chr1	66947606	66947929	static	Peak_726	chr1	66947608	66947898	1080	290
chr1	67045238	67045476	static	Peak_727	chr1	67045087	67045824	1081	238
chr1	67048801	67049140	dDHS_close	Peak_728	chr1	67048208	67049269	1083	339
chr1	67102512	67102748	static	Peak_729	chr1	67102109	67103042	1090	236
chr1	67107891	67108522	static	Peak_730	chr1	67108098	67108458	1091	360
chr1	67123904	67124871	static	Peak_731	chr1	67124023	67124859	1093	836
chr1	67125301	67125680	dDHS_close	Peak_732	chr1	67125167	67125626	1094	325
chr1	67139121	67139480	dDHS_close	Peak_733	chr1	67139009	67139511	1095	359
chr1	67148871	67149185	static	Peak_734	chr1	67148756	67149354	1097	314
chr1	67149888	67151052	static	Peak_735	chr1	67150014	67150901	1099	887
chr1	67159916	67160537	static	Peak_736	chr1	67159900	67160583	1100	621
chr1	67162984	67163688	static	Peak_737	chr1	67162863	67163703	1101	704
chr1	67169275	67169914	static	Peak_738	chr1	67169264	67169996	1103	639
chr1	67171721	67171920	dDHS_open	Peak_739	chr1	67171060	67172434	1104	199
chr1	67222142	67222351	static	Peak_740	chr1	67221892	67222384	1128	209
chr1	67263873	67264280	static	Peak_741	chr1	67263803	67264435	1151	407
chr1	67404286	67404607	static	Peak_742	chr1	67404270	67404641	1164	321
chr1	68050149	68050349	static	Peak_743	.	-1	-1	.	0
chr1	69020272	69020899	static	Peak_744	chr1	69020391	69020677	1165	286
chr1	69680853	69681144	static	Peak_745	.	-1	-1	.	0
chr1	70739134	70739499	static	Peak_746	chr1	70739056	70739494	1168	360
chr1	71149220	71150129	static	Peak_747	chr1	71148825	71150011	1171	791
chr1	71277679	71278393	static	Peak_748	chr1	71277838	71278355	1172	517
chr1	71603417	71604037	static	Peak_749	chr1	71603468	71604176	1174	569
chr1	71622533	71622969	static	Peak_750	chr1	71622390	71623435	1175	436
chr1	71626108	71626447	static	Peak_751	chr1	71626073	71626491	1179	339
chr1	71678997	71679268	static	Peak_752	chr1	71679026	71679334	1191	242
chr1	71680959	71681650	static	Peak_753	chr1	71680965	71681929	1193	685
chr1	71693436	71694255	static	Peak_754	chr1	71693395	71694163	1196	727
chr1	71697316	71697668	static	Peak_755	chr1	71697076	71697756	1198	352
chr1	71699530	71700282	static	Peak_756	chr1	71698911	71700816	1200	752
chr1	71768932	71769213	static	Peak_757	.	-1	-1	.	0
chr1	71770118	71770838	static	Peak_758	chr1	71770379	71770827	1202	448
chr1	71778070	71778591	static	Peak_759	chr1	71778247	71778718	1203	344
chr1	71814333	71814646	static	Peak_760	chr1	71814347	71814593	1204	246
chr1	71854192	71854877	static	Peak_761	chr1	71854220	71854482	1205	262
chr1	71883926	71884719	static	Peak_762	chr1	71883766	71884180	1207	254
chr1	71920812	71921012	static	Peak_763	chr1	71920724	71920968	1209	156
chr1	71933319	71933891	static	Peak_764	.	-1	-1	.	0
chr1	71934086	71934836	static	Peak_765	.	-1	-1	.	0
chr1	71945668	71946117	static	Peak_766	chr1	71945787	71946127	1211	330
chr1	71958740	71959733	static	Peak_767	chr1	71958832	71959597	1213	765
chr1	71972105	71972357	static	Peak_768	chr1	71972191	71972378	1215	166
chr1	71985361	71985560	dDHS_close	Peak_769	chr1	71984537	71985679	1217	199
chr1	71987561	71987920	dDHS_close	Peak_770	chr1	71987522	71987815	1218	254
chr1	72011128	72011728	static	Peak_771	.	-1	-1	.	0
chr1	72059120	72059690	static	Peak_772	chr1	72059356	72059596	1220	240
chr1	72078741	72079420	dDHS_close	Peak_773	chr1	72078794	72079219	1222	425
chr1	72123294	72123531	static	Peak_774	.	-1	-1	.	0
chr1	72153261	72153484	static	Peak_775	.	-1	-1	.	0
chr1	72170108	72170490	static	Peak_776	chr1	72170322	72170492	1224	168
chr1	72219723	72220478	static	Peak_777	chr1	72219516	72220519	1226	755
chr1	72226307	72226920	static	Peak_778	chr1	72226403	72227061	1229	517
chr1	72229714	72230136	static	Peak_779	chr1	72229539	72230115	1230	401
chr1	72256767	72257756	static	Peak_780	chr1	72257170	72257832	1232	586
chr1	72258741	72259080	dDHS_open	Peak_781	chr1	72258129	72259020	1233	279
chr1	72272246	72272647	static	Peak_782	chr1	72271889	72273538	1235	401
chr1	72272861	72273320	dDHS_close	Peak_783	chr1	72271889	72273538	1235	459
chr1	72283008	72283222	static	Peak_784	chr1	72282971	72283287	1236	214
chr1	72283646	72284051	static	Peak_785	chr1	72283533	72283790	1237	144
chr1	72290901	72291200	dDHS_close	Peak_786	chr1	72290192	72291185	1238	284
chr1	72301218	72301474	static	Peak_787	chr1	72300908	72302352	1239	256
chr1	72301641	72302120	dDHS_close	Peak_788	chr1	72300908	72302352	1239	479
chr1	72309785	72310053	static	Peak_789	.	-1	-1	.	0
chr1	72324425	72325091	static	Peak_790	chr1	72324365	72325015	1242	590
chr1	72329155	72329577	static	Peak_791	chr1	72328512	72329604	1245	422
chr1	72330503	72331064	static	Peak_792	chr1	72330498	72331074	1246	561
chr1	72335049	72335702	static	Peak_793	chr1	72334314	72335709	1248	653
chr1	72340430	72341087	static	Peak_794	chr1	72340456	72340810	1251	354
chr1	72353319	72354379	static	Peak_795	chr1	72353583	72354369	1254	786
chr1	72381128	72381817	static	Peak_796	chr1	72381351	72381783	1255	432
chr1	72459443	72459852	static	Peak_797	chr1	72459552	72459872	1256	300
chr1	72629901	72630300	dDHS_open	Peak_798	chr1	72629491	72630309	1257	399
chr1	72757661	72758020	dDHS_open	Peak_799	chr1	72757520	72758471	1259	359
chr1	72765530	72765955	static	Peak_800	chr1	72765489	72765930	1260	400
chr1	72772299	72773021	static	Peak_801	chr1	72772535	72772907	1261	372
chr1	72785547	72785858	static	Peak_802	chr1	72785486	72785922	1262	311
chr1	72797871	72798387	static	Peak_803	chr1	72797940	72798293	1263	353
chr1	72806314	72806690	static	Peak_804	chr1	72806365	72806655	1264	290
chr1	72819273	72820205	static	Peak_805	chr1	72819203	72820355	1265	932
chr1	72838341	72838540	dDHS_close	Peak_806	chr1	72838203	72839351	1267	199
chr1	72856441	72857320	dDHS_open	Peak_807	chr1	72855777	72857230	1269	789
chr1	72870501	72871200	dDHS_open	Peak_808	chr1	72870547	72871536	1270	653
chr1	72883856	72884122	static	Peak_809	.	-1	-1	.	0
chr1	72888994	72889836	static	Peak_810	chr1	72889216	72889881	1272	620
chr1	72900281	72901140	dDHS_open	Peak_811	chr1	72900481	72901821	1273	659
chr1	72901461	72901700	dDHS_open	Peak_812	chr1	72900481	72901821	1273	239
chr1	72917061	72917260	dDHS_close	Peak_813	chr1	72916734	72917981	1276	199
chr1	73346673	73347156	static	Peak_814	chr1	73346619	73347163	1283	483
chr1	73575214	73575589	static	Peak_815	chr1	73575218	73575574	1285	356
chr1	73676661	73677428	static	Peak_816	chr1	73676872	73677366	1287	494
chr1	73701349	73701955	static	Peak_817	.	-1	-1	.	0
chr1	73718863	73719214	static	Peak_818	chr1	73718874	73719222	1288	340
chr1	73730279	73730529	static	Peak_819	.	-1	-1	.	0
chr1	73730894	73731178	static	Peak_820	.	-1	-1	.	0
chr1	73948110	73948349	static	Peak_821	chr1	73948122	73948636	1290	227
chr1	73969789	73970048	static	Peak_822	chr1	73969737	73970220	1296	259
chr1	73975797	73976258	static	Peak_823	.	-1	-1	.	0
chr1	74012899	74013099	static	Peak_824	chr1	74012847	74013353	1306	200
chr1	74034469	74034703	static	Peak_825	chr1	74034354	74034795	1307	234
chr1	74055016	74055225	static	Peak_826	chr1	74055017	74055898	1310	208
chr1	74059635	74060304	static	Peak_827	chr1	74059482	74060629	1311	669
chr1	74061054	74061511	static	Peak_828	chr1	74060987	74061851	1312	457
chr1	74066911	74067111	static	Peak_829	chr1	74066949	74067199	1315	162
chr1	74067474	74067765	static	Peak_830	chr1	74067589	74067774	1316	176
chr1	74074120	74074698	static	Peak_831	chr1	74074028	74074886	1318	578
chr1	74077615	74077819	static	Peak_832	chr1	74077506	74077958	1320	204
chr1	74090188	74091395	static	Peak_833	chr1	74090907	74091457	1323	488
chr1	74104149	74104414	static	Peak_834	chr1	74104158	74104491	1325	256
chr1	74104803	74105531	static	Peak_835	chr1	74104777	74105853	1326	728
chr1	74108482	74108740	static	Peak_836	chr1	74108276	74108696	1328	214
chr1	74115455	74116991	static	Peak_837	.	-1	-1	.	0
chr1	74129426	74129672	static	Peak_838	chr1	74129240	74129728	1333	246
chr1	74152255	74152591	static	Peak_839	chr1	74152293	74152555	1334	262
chr1	74156241	74156628	static	Peak_840	chr1	74156266	74156579	1335	313
chr1	74236995	74237531	static	Peak_841	chr1	74236822	74237528	1338	533
chr1	74239408	74239656	static	Peak_842	chr1	74239241	74239644	1339	236
chr1	74243164	74243827	static	Peak_843	chr1	74243135	74243818	1341	654
chr1	74244714	74245006	static	Peak_844	chr1	74244501	74244898	1342	184
chr1	74282721	74282920	dDHS_open	Peak_845	chr1	74282647	74283827	1344	199
chr1	74295663	74296421	static	Peak_846	chr1	74295973	74296456	1346	448
chr1	74330991	74331707	static	Peak_847	chr1	74330702	74332012	1348	716
chr1	74350495	74350848	static	Peak_848	chr1	74350280	74350962	1353	353
chr1	74351024	74351348	static	Peak_849	.	-1	-1	.	0
chr1	74353814	74354037	static	Peak_850	chr1	74353791	74353947	1354	133
chr1	74359921	74360522	static	Peak_851	chr1	74360037	74360178	1355	141
chr1	74378633	74379377	static	Peak_852	chr1	74378573	74379426	1356	744
chr1	74382141	74382360	dDHS_close	Peak_853	chr1	74382042	74382664	1358	219
chr1	74386815	74387317	static	Peak_854	chr1	74386744	74387370	1359	502
chr1	74408447	74408659	static	Peak_855	chr1	74408483	74408640	1360	157
chr1	74425367	74426017	static	Peak_856	chr1	74425554	74426033	1362	463
chr1	74433661	74433980	dDHS_open	Peak_857	chr1	74433175	74433958	1363	297
chr1	74438381	74438760	dDHS_open	Peak_858	.	-1	-1	.	0
chr1	74443371	74444416	static	Peak_859	chr1	74443059	74444961	1370	1045
chr1	74446901	74447440	dDHS_close	Peak_860	chr1	74446948	74447472	1371	492
chr1	74499153	74499559	static	Peak_861	.	-1	-1	.	0
chr1	74552601	74553000	dDHS_open	Peak_862	chr1	74552211	74553326	1374	399
chr1	74558048	74558250	static	Peak_863	.	-1	-1	.	0
chr1	74634299	74635074	static	Peak_864	chr1	74634063	74635162	1375	775
chr1	74647797	74648299	static	Peak_865	chr1	74647592	74648365	1376	502
chr1	74707893	74708699	static	Peak_866	chr1	74707911	74708687	1377	776
chr1	74711805	74712019	static	Peak_867	.	-1	-1	.	0
chr1	74745148	74745719	static	Peak_868	chr1	74745369	74745722	1379	350
chr1	74759355	74760310	static	Peak_869	chr1	74759337	74760481	1380	955
chr1	74765781	74766320	dDHS_close	Peak_870	chr1	74765768	74766197	1381	416
chr1	74767841	74768540	dDHS_close	Peak_871	chr1	74767648	74768817	1382	699
chr1	74797181	74797500	dDHS_close	Peak_872	chr1	74797276	74797682	1384	224
chr1	74804926	74805126	static	Peak_873	.	-1	-1	.	0
chr1	74819628	74820023	static	Peak_874	chr1	74819785	74819966	1385	181
chr1	74854221	74855020	dDHS_open	Peak_875	chr1	74854236	74854986	1387	750
chr1	74863122	74863875	static	Peak_876	chr1	74863161	74863797	1388	636
chr1	74947363	74948009	static	Peak_877	chr1	74947377	74947929	1389	552
chr1	74995869	74996602	static	Peak_878	chr1	74995495	74996895	1390	733
chr1	75009341	75009540	dDHS_open	Peak_879	chr1	75009034	75009896	1394	199
chr1	75018022	75018544	static	Peak_880	chr1	75018186	75018560	1396	358
chr1	75056539	75057112	static	Peak_881	chr1	75056553	75057098	1397	545
chr1	75070995	75071454	static	Peak_882	chr1	75071051	75071607	1401	403
chr1	75121101	75121800	dDHS_open	Peak_883	chr1	75120677	75121962	1405	699
chr1	75139101	75139700	dDHS_open	Peak_884	chr1	75138838	75139956	1407	599
chr1	75144081	75145220	dDHS_open	Peak_885	chr1	75143932	75144800	1408	719
chr1	75145269	75145745	static	Peak_886	chr1	75145283	75145851	1409	462
chr1	75165081	75165660	dDHS_open	Peak_887	chr1	75164805	75165922	1410	579
chr1	75175890	75176418	static	Peak_888	chr1	75176086	75177245	1412	332
chr1	75176500	75177202	static	Peak_889	chr1	75176086	75177245	1412	702
chr1	75188821	75189180	dDHS_open	Peak_890	chr1	75187931	75189253	1416	359
chr1	75207245	75207714	static	Peak_891	chr1	75206995	75207976	1417	469
chr1	75210898	75211847	static	Peak_892	chr1	75210931	75211931	1420	916
chr1	75215509	75216099	static	Peak_893	chr1	75214934	75216629	1424	590
chr1	75232582	75233551	static	Peak_894	chr1	75232670	75233713	1427	881
chr1	75248061	75248520	dDHS_open	Peak_895	chr1	75248001	75248569	1430	459
chr1	75313577	75314702	static	Peak_896	chr1	75312964	75314788	1435	1125
chr1	75334293	75334755	static	Peak_897	chr1	75334324	75334511	1437	187
chr1	75432317	75432728	static	Peak_898	chr1	75432436	75432716	1439	280
chr1	75475721	75476196	static	Peak_899	chr1	75475590	75476356	1442	475
chr1	75517783	75518617	static	Peak_900	chr1	75517947	75518463	1443	516
chr1	75534224	75534485	static	Peak_901	chr1	75534220	75534508	1444	261
chr1	75535181	75535780	dDHS_close	Peak_902	chr1	75535292	75535652	1445	360
chr1	75556198	75556399	static	Peak_903	chr1	75556094	75556431	1446	201
chr1	75584821	75585160	dDHS_close	Peak_904	chr1	75584637	75585020	1447	199
chr1	75632170	75632507	static	Peak_905	chr1	75632142	75632453	1448	283
chr1	75649487	75649820	static	Peak_906	.	-1	-1	.	0
chr1	75650391	75650725	static	Peak_907	chr1	75650336	75650679	1450	288
chr1	75656912	75657882	static	Peak_908	chr1	75656762	75657682	1451	770
chr1	75689751	75690034	static	Peak_909	.	-1	-1	.	0
chr1	75933391	75933625	static	Peak_910	.	-1	-1	.	0
chr1	76006898	76007244	static	Peak_911	.	-1	-1	.	0
chr1	76035766	76036069	static	Peak_912	chr1	76035652	76036139	1453	303
chr1	76046755	76046967	static	Peak_913	.	-1	-1	.	0
chr1	76370618	76370818	static	Peak_914	chr1	76370578	76370871	1454	200
chr1	76739587	76739833	static	Peak_915	.	-1	-1	.	0
chr1	76907855	76908458	static	Peak_916	chr1	76907890	76908430	1455	540
chr1	76916081	76916540	dDHS_close	Peak_917	chr1	76915581	76916605	1456	459
chr1	76939181	76939740	dDHS_close	Peak_918	chr1	76939225	76939851	1457	515
chr1	76980295	76980732	static	Peak_919	.	-1	-1	.	0
chr1	77078911	77079274	static	Peak_920	.	-1	-1	.	0
chr1	77203158	77203456	static	Peak_921	.	-1	-1	.	0
chr1	77462136	77462383	static	Peak_922	chr1	77462208	77462527	1459	175
chr1	77511630	77511913	static	Peak_923	.	-1	-1	.	0
chr1	77512810	77513090	static	Peak_924	.	-1	-1	.	0
chr1	78090326	78090606	static	Peak_925	chr1	78090335	78090483	1463	148
chr1	78139731	78140089	static	Peak_926	chr1	78139576	78139989	1464	258
chr1	78318768	78319278	static	Peak_927	chr1	78318857	78319322	1465	421
chr1	78485141	78485900	dDHS_open	Peak_928	chr1	78484894	78486170	1466	759
chr1	78507434	78507881	static	Peak_929	.	-1	-1	.	0
chr1	78521821	78522033	static	Peak_930	chr1	78521891	78522025	1469	134
chr1	78533516	78534680	static	Peak_931	chr1	78534036	78534672	1471	636
chr1	78535090	78535388	static	Peak_932	chr1	78535029	78535499	1472	298
chr1	78564464	78565296	static	Peak_933	chr1	78564548	78565162	1473	614
chr1	78583593	78584017	static	Peak_934	chr1	78583628	78583928	1474	300
chr1	78646201	78646500	dDHS_open	Peak_935	chr1	78646285	78646631	1475	215
chr1	78654102	78654717	static	Peak_936	chr1	78654088	78655473	1477	615
chr1	78856666	78856866	static	Peak_937	chr1	78856653	78856843	1480	177
chr1	79412819	79413419	static	Peak_938	chr1	79412987	79413286	1481	299
chr1	79463041	79463620	dDHS_close	Peak_939	chr1	79463104	79463817	1482	516
chr1	79589326	79589580	static	Peak_940	chr1	79589327	79589682	1483	253
chr1	79668556	79668842	static	Peak_941	chr1	79668369	79668986	1484	286
chr1	79758232	79758544	static	Peak_942	chr1	79757278	79758716	1486	312
chr1	79772247	79773010	static	Peak_943	chr1	79772448	79773110	1487	562
chr1	80322329	80322641	static	Peak_944	chr1	80322488	80322653	1489	153
chr1	80336881	80337140	dDHS_open	Peak_945	chr1	80336272	80338123	1490	259
chr1	80337281	80337500	dDHS_open	Peak_946	chr1	80336272	80338123	1490	219
chr1	80423980	80424314	static	Peak_947	.	-1	-1	.	0
chr1	80424354	80425002	static	Peak_948	chr1	80424533	80424864	1492	331
chr1	80662447	80662647	static	Peak_949	.	-1	-1	.	0
chr1	81741593	81742073	static	Peak_950	chr1	81741133	81742172	1493	480
chr1	81946660	81947970	static	Peak_951	chr1	81946393	81947183	1494	523
chr1	81964309	81964935	static	Peak_952	chr1	81964396	81964707	1496	311
chr1	82007606	82007869	static	Peak_953	.	-1	-1	.	0
chr1	82015148	82015569	static	Peak_954	.	-1	-1	.	0
chr1	82028957	82029525	static	Peak_955	chr1	82029041	82029297	1497	256
chr1	82121030	82121442	static	Peak_956	chr1	82121238	82121370	1498	132
chr1	82155712	82156400	static	Peak_957	chr1	82155641	82156306	1501	594
chr1	82164768	82165915	static	Peak_958	chr1	82164762	82165938	1503	1147
chr1	82176913	82177328	static	Peak_959	chr1	82176931	82177707	1504	397
chr1	82180373	82181383	static	Peak_960	chr1	82180365	82181547	1505	1010
chr1	82231002	82231793	static	Peak_961	chr1	82231138	82232011	1507	655
chr1	82234865	82235306	static	Peak_962	chr1	82234805	82235278	1508	413
chr1	82243972	82244709	static	Peak_963	chr1	82243960	82244741	1511	737
chr1	82279760	82280345	static	Peak_964	chr1	82279514	82280851	1515	585
chr1	82287681	82288080	dDHS_open	Peak_965	.	-1	-1	.	0
chr1	82312717	82313472	static	Peak_966	chr1	82312635	82313642	1523	755
chr1	82721321	82721900	dDHS_open	Peak_967	chr1	82721282	82722061	1526	579
chr1	82784011	82784321	static	Peak_968	chr1	82784025	82784372	1527	296
chr1	82812490	82812907	static	Peak_969	chr1	82812570	82812862	1528	292
chr1	82836161	82836460	dDHS_open	Peak_970	chr1	82835703	82836574	1529	299
chr1	83034737	83035153	static	Peak_971	.	-1	-1	.	0
chr1	83896949	83897272	static	Peak_972	chr1	83896719	83897207	1533	258
chr1	83903641	83904260	dDHS_open	Peak_973	chr1	83903348	83903989	1534	348
chr1	83939717	83939954	static	Peak_974	.	-1	-1	.	0
chr1	84128676	84128879	static	Peak_975	.	-1	-1	.	0
chr1	84222086	84222591	static	Peak_976	chr1	84222223	84222652	1539	368
chr1	84237661	84238120	dDHS_close	Peak_977	chr1	84237646	84238355	1541	459
chr1	84250134	84250921	static	Peak_978	chr1	84250349	84250859	1542	510
chr1	84269287	84269990	static	Peak_979	chr1	84269545	84269918	1544	373
chr1	84274778	84275937	static	Peak_980	chr1	84274775	84276172	1547	1159
chr1	84282011	84282695	static	Peak_981	chr1	84280682	84282657	1550	646
chr1	84296357	84296608	static	Peak_982	.	-1	-1	.	0
chr1	84359213	84359775	static	Peak_983	chr1	84359398	84359850	1552	377
chr1	84396189	84396848	static	Peak_984	chr1	84396198	84396767	1553	569
chr1	84415980	84416800	static	Peak_985	chr1	84416008	84416783	1554	775
chr1	84719079	84719655	static	Peak_986	chr1	84719034	84719268	1557	189
chr1	84836141	84836360	dDHS_open	Peak_987	chr1	84835151	84837082	1559	219
chr1	84848096	84848671	static	Peak_988	chr1	84848133	84848628	1560	495
chr1	84867670	84869212	static	Peak_989	chr1	84867669	84868435	1561	765
chr1	84874178	84874604	static	Peak_990	chr1	84874223	84874522	1563	299
chr1	84876218	84876432	static	Peak_991	chr1	84876212	84876582	1564	214
chr1	87600167	87600496	static	Peak_992	chr1	87599917	87600404	1568	237
chr1	87632364	87632691	static	Peak_993	.	-1	-1	.	0
chr1	87689838	87690348	static	Peak_994	chr1	87689702	87690402	1569	510
chr1	87690802	87691199	static	Peak_995	chr1	87690562	87691282	1570	397
chr1	87749935	87750135	static	Peak_996	chr1	87749891	87750158	1571	200
chr1	87819457	87819657	static	Peak_997	chr1	87819473	87819806	1575	184
chr1	87856386	87856862	static	Peak_998	.	-1	-1	.	0
chr1	87878480	87878906	static	Peak_999	chr1	87878647	87878849	1578	202
chr1	87904424	87904961	static	Peak_1000	chr1	87904487	87904674	1579	187
chr1	87935181	87935380	dDHS_open	Peak_1001	chr1	87934522	87935605	1580	199
chr1	87936645	87937130	static	Peak_1002	chr1	87936643	87937237	1582	485
chr1	87943440	87944132	static	Peak_1003	chr1	87942391	87944275	1584	692
chr1	87949606	87950150	static	Peak_1004	chr1	87949445	87950363	1585	544
chr1	87952624	87953390	static	Peak_1005	chr1	87952645	87953710	1587	745
chr1	87955557	87956338	static	Peak_1006	chr1	87955446	87956518	1589	781
chr1	87960761	87961420	dDHS_open	Peak_1007	chr1	87960157	87961940	1591	659
chr1	87974264	87974464	static	Peak_1008	.	-1	-1	.	0
chr1	88050897	88051465	static	Peak_1009	chr1	88051036	88051537	1592	429
chr1	88072360	88073153	static	Peak_1010	chr1	88072596	88073162	1593	557
chr1	88255493	88256387	static	Peak_1011	chr1	88255129	88256768	1595	894
chr1	88303352	88303946	static	Peak_1012	chr1	88303284	88303913	1598	561
chr1	88330641	88330980	dDHS_open	Peak_1013	chr1	88330575	88331552	1601	339
chr1	88337190	88337438	static	Peak_1014	chr1	88337022	88337520	1603	248
chr1	88338321	88338740	dDHS_open	Peak_1015	chr1	88338508	88339506	1605	232
chr1	88338821	88339600	dDHS_open	Peak_1016	chr1	88338508	88339506	1605	685
chr1	88366803	88367681	static	Peak_1017	chr1	88366733	88367835	1606	878
chr1	88375722	88376142	static	Peak_1018	chr1	88375714	88375986	1607	264
chr1	88383650	88384650	static	Peak_1019	chr1	88383683	88384777	1608	967
chr1	88387303	88387645	static	Peak_1020	chr1	88387260	88387706	1610	342
chr1	88393747	88394108	static	Peak_1021	chr1	88393815	88395016	1612	293
chr1	88394346	88394887	static	Peak_1022	chr1	88393815	88395016	1612	541
chr1	88400781	88401260	dDHS_open	Peak_1023	chr1	88400115	88401414	1615	479
chr1	88422061	88422480	dDHS_open	Peak_1024	.	-1	-1	.	0
chr1	88422721	88423400	dDHS_open	Peak_1025	.	-1	-1	.	0
chr1	88478797	88479564	static	Peak_1026	chr1	88478394	88479607	1624	767
chr1	88491798	88492480	static	Peak_1027	chr1	88491891	88492576	1626	589
chr1	88504621	88505040	dDHS_close	Peak_1028	chr1	88504533	88504955	1630	334
chr1	88515142	88515592	static	Peak_1029	chr1	88515179	88515280	1631	101
chr1	88529837	88530313	static	Peak_1030	chr1	88530096	88530268	1632	172
chr1	88600018	88600849	static	Peak_1031	chr1	88599981	88600754	1636	736
chr1	88608575	88608992	static	Peak_1032	chr1	88608676	88608905	1637	229
chr1	88609581	88609989	static	Peak_1033	chr1	88609694	88610156	1638	295
chr1	88614647	88614847	static	Peak_1034	.	-1	-1	.	0
chr1	88643621	88643952	static	Peak_1035	.	-1	-1	.	0
chr1	88755549	88755811	static	Peak_1036	chr1	88755522	88755734	1639	185
chr1	88776078	88776542	static	Peak_1037	chr1	88776158	88776461	1640	303
chr1	88822452	88822851	static	Peak_1038	.	-1	-1	.	0
chr1	88848345	88848779	static	Peak_1039	chr1	88848454	88848700	1641	246
chr1	88928943	88929464	static	Peak_1040	chr1	88928934	88929530	1646	521
chr1	89037718	89037918	static	Peak_1041	.	-1	-1	.	0
chr1	89083654	89083854	static	Peak_1042	.	-1	-1	.	0
chr1	89093908	89094459	static	Peak_1043	chr1	89093915	89094347	1650	432
chr1	89110120	89110961	static	Peak_1044	chr1	89109653	89111250	1651	841
chr1	89190691	89191506	static	Peak_1045	chr1	89191444	89191856	1656	62
chr1	89213249	89213449	static	Peak_1046	chr1	89213300	89213525	1657	149
chr1	89213478	89213708	static	Peak_1047	chr1	89213300	89213525	1657	47
chr1	89223071	89223895	static	Peak_1048	chr1	89222928	89224273	1658	824
chr1	89470801	89471220	dDHS_open	Peak_1049	.	-1	-1	.	0
chr1	89471241	89471660	dDHS_open	Peak_1050	.	-1	-1	.	0
chr1	89480419	89480619	static	Peak_1051	.	-1	-1	.	0
chr1	89497092	89497350	static	Peak_1052	chr1	89497225	89497390	1662	125
chr1	89652701	89653020	dDHS_open	Peak_1053	chr1	89652319	89653104	1666	319
chr1	89660242	89660932	static	Peak_1054	chr1	89660287	89660946	1667	645
chr1	89668426	89668663	static	Peak_1055	chr1	89668386	89668753	1668	237
chr1	89670021	89670280	dDHS_close	Peak_1056	chr1	89669771	89670196	1669	175
chr1	89675671	89676462	static	Peak_1057	chr1	89675752	89676150	1670	398
chr1	89695281	89695480	dDHS_open	Peak_1058	chr1	89694906	89695326	1671	45
chr1	89749639	89749924	static	Peak_1059	chr1	89749651	89750129	1673	273
chr1	89776178	89776841	static	Peak_1060	chr1	89776170	89776823	1674	645
chr1	89778322	89778540	static	Peak_1061	chr1	89778251	89778511	1675	189
chr1	89787629	89788009	static	Peak_1062	chr1	89787577	89787919	1676	290
chr1	89797438	89798022	static	Peak_1063	chr1	89797494	89798000	1680	506
chr1	89805226	89805707	static	Peak_1064	.	-1	-1	.	0
chr1	89821574	89821849	static	Peak_1065	chr1	89821400	89821921	1682	275
chr1	89826206	89826654	static	Peak_1066	chr1	89826278	89826711	1683	376
chr1	89889482	89889700	static	Peak_1067	chr1	89889424	89889589	1685	107
chr1	89904187	89905247	static	Peak_1068	chr1	89904315	89905192	1686	877
chr1	89910262	89911579	static	Peak_1069	chr1	89910274	89911655	1688	1305
chr1	89920762	89921011	static	Peak_1070	chr1	89920742	89921081	1690	249
chr1	89921489	89921850	static	Peak_1071	chr1	89921592	89921898	1691	258
chr1	89941483	89941692	static	Peak_1072	chr1	89941446	89941929	1694	209
chr1	89966981	89967540	dDHS_open	Peak_1073	chr1	89967171	89967637	1697	369
chr1	89969309	89969538	static	Peak_1074	chr1	89969062	89969612	1698	229
chr1	89970878	89971547	static	Peak_1075	chr1	89970898	89971386	1699	488
chr1	90002298	90002706	static	Peak_1076	chr1	90002292	90002685	1702	387
chr1	90058921	90059351	static	Peak_1077	chr1	90059342	90059575	1708	9
chr1	90062101	90063164	static	Peak_1078	.	-1	-1	.	0
chr1	90076105	90076676	static	Peak_1079	chr1	90076105	90076660	1712	555
chr1	90081479	90081772	static	Peak_1080	.	-1	-1	.	0
chr1	90092279	90092749	static	Peak_1081	chr1	90092336	90092601	1713	265
chr1	90103307	90103768	static	Peak_1082	chr1	90103458	90103809	1715	310
chr1	90166370	90166650	static	Peak_1083	.	-1	-1	.	0
chr1	90302980	90303815	static	Peak_1084	chr1	90303052	90304022	1752	763
chr1	90315511	90315974	static	Peak_1085	chr1	90315565	90315963	1754	398
chr1	90472444	90472644	static	Peak_1086	.	-1	-1	.	0
chr1	90521884	90522084	static	Peak_1087	.	-1	-1	.	0
chr1	90551590	90551933	static	Peak_1088	chr1	90551466	90551660	1760	70
chr1	90598618	90598818	static	Peak_1089	.	-1	-1	.	0
chr1	90598878	90599086	static	Peak_1090	.	-1	-1	.	0
chr1	90602481	90602681	static	Peak_1091	chr1	90602419	90602823	1762	200
chr1	90645756	90645956	static	Peak_1092	chr1	90645631	90646032	1763	200
chr1	90851319	90851889	static	Peak_1093	chr1	90851183	90851903	1766	570
chr1	90922623	90923028	static	Peak_1094	chr1	90922694	90922989	1767	295
chr1	90966426	90967031	static	Peak_1095	chr1	90966198	90967314	1768	605
chr1	91000166	91000366	static	Peak_1096	chr1	91000113	91000413	1769	200
chr1	91000818	91001365	static	Peak_1097	chr1	91000847	91001435	1770	518
chr1	91350880	91351720	static	Peak_1098	chr1	91350459	91351731	1776	840
chr1	91353118	91353530	static	Peak_1099	chr1	91352008	91353720	1777	412
chr1	91392808	91393224	static	Peak_1100	chr1	91392758	91393260	1780	416
chr1	91412549	91412882	static	Peak_1101	chr1	91412416	91412934	1781	333
chr1	91451884	91452262	static	Peak_1102	chr1	91451516	91452344	1784	378
chr1	91454068	91454356	static	Peak_1103	chr1	91454066	91454919	1785	288
chr1	91513925	91514320	static	Peak_1104	chr1	91513966	91514430	1786	354
chr1	91518682	91518894	static	Peak_1105	chr1	91518586	91519047	1788	212
chr1	91542939	91543519	static	Peak_1106	chr1	91542717	91543676	1790	580
chr1	91566322	91567320	static	Peak_1107	chr1	91566329	91567309	1791	980
chr1	91611301	91611620	dDHS_close	Peak_1108	chr1	91610720	91611691	1793	319
chr1	91719003	91719436	static	Peak_1109	chr1	91719051	91719396	1795	345
chr1	91806541	91806940	dDHS_open	Peak_1110	chr1	91806429	91806721	1797	180
chr1	91839844	91840050	static	Peak_1111	.	-1	-1	.	0
chr1	92058360	92058560	static	Peak_1112	chr1	92058227	92058533	1802	173
chr1	92131129	92131502	static	Peak_1113	chr1	92131116	92131544	1803	373
chr1	92134854	92135209	static	Peak_1114	chr1	92135195	92135455	1804	14
chr1	92291994	92292343	static	Peak_1115	chr1	92292026	92292187	1806	161
chr1	92301326	92301963	static	Peak_1116	chr1	92301387	92301862	1807	475
chr1	92305501	92306067	static	Peak_1117	chr1	92305515	92305705	1808	190
chr1	92489457	92489657	static	Peak_1118	.	-1	-1	.	0
chr1	92499501	92500378	static	Peak_1119	chr1	92499625	92500406	1815	753
chr1	92547380	92547862	static	Peak_1120	chr1	92547357	92548109	1816	482
chr1	92864110	92864461	static	Peak_1121	.	-1	-1	.	0
chr1	92865740	92866064	static	Peak_1122	chr1	92865697	92866752	1824	324
chr1	92949474	92950172	static	Peak_1123	chr1	92948956	92950913	1829	698
chr1	92953842	92954263	static	Peak_1124	chr1	92953861	92954356	1830	402
chr1	92961373	92962080	static	Peak_1125	chr1	92961305	92962280	1833	707
chr1	92992206	92992592	static	Peak_1126	chr1	92992102	92992644	1835	386
chr1	92998207	92998978	static	Peak_1127	chr1	92997948	92999254	1837	771
chr1	93121052	93121252	static	Peak_1128	.	-1	-1	.	0
chr1	93137288	93137494	static	Peak_1129	chr1	93137358	93137576	1841	136
chr1	93141790	93142027	static	Peak_1130	chr1	93141541	93142062	1842	237
chr1	93146523	93147246	static	Peak_1131	chr1	93146497	93147547	1843	723
chr1	93194644	93195108	static	Peak_1132	chr1	93194402	93195274	1845	464
chr1	93196617	93196817	static	Peak_1133	chr1	93196357	93197128	1847	200
chr1	93197856	93198529	static	Peak_1134	chr1	93197870	93198596	1848	659
chr1	93208905	93209135	static	Peak_1135	chr1	93208904	93209160	1850	230
chr1	93213913	93214622	static	Peak_1136	chr1	93213430	93214649	1851	709
chr1	93295032	93295651	static	Peak_1137	chr1	93294852	93295664	1855	619
chr1	93309662	93310481	static	Peak_1138	.	-1	-1	.	0
chr1	93316981	93317180	dDHS_close	Peak_1139	chr1	93316593	93317819	1858	199
chr1	93325297	93325526	static	Peak_1140	chr1	93325287	93325650	1861	229
chr1	93332928	93333528	static	Peak_1141	chr1	93332239	93333799	1862	600
chr1	93336422	93336973	static	Peak_1142	chr1	93336034	93337181	1863	551
chr1	93339051	93339587	static	Peak_1143	chr1	93338407	93340000	1864	536
chr1	93342565	93343132	static	Peak_1144	chr1	93342430	93343743	1866	567
chr1	93352198	93353079	static	Peak_1145	chr1	93351819	93353629	1867	881
chr1	93353088	93353462	static	Peak_1146	chr1	93351819	93353629	1867	374
chr1	93355441	93356500	dDHS_open	Peak_1147	chr1	93354726	93356618	1870	1059
chr1	93361846	93362270	static	Peak_1148	chr1	93361834	93362274	1873	424
chr1	93380108	93380617	static	Peak_1149	chr1	93379986	93380356	1874	248
chr1	93386807	93387151	static	Peak_1150	.	-1	-1	.	0
chr1	93390932	93391393	static	Peak_1151	chr1	93390744	93391594	1875	461
chr1	93426770	93427343	static	Peak_1152	chr1	93426706	93427064	1878	294
chr1	93436793	93437491	static	Peak_1153	chr1	93436195	93437924	1879	698
chr1	93718731	93719147	static	Peak_1154	chr1	93718669	93719188	1881	416
chr1	93720157	93720747	static	Peak_1155	chr1	93720126	93720864	1882	590
chr1	93768908	93769268	static	Peak_1156	chr1	93768983	93769272	1883	285
chr1	93779492	93780223	static	Peak_1157	chr1	93779676	93780079	1886	403
chr1	93790778	93791304	static	Peak_1158	chr1	93790372	93791271	1887	493
chr1	93799898	93800622	static	Peak_1159	chr1	93799872	93800704	1889	724
chr1	93885277	93885878	static	Peak_1160	chr1	93884977	93885822	1893	545
chr1	93924819	93925111	static	Peak_1161	chr1	93924802	93925082	1894	263
chr1	93984211	93984739	static	Peak_1162	chr1	93984503	93984709	1895	206
chr1	93996171	93996401	static	Peak_1163	chr1	93996101	93996374	1896	203
chr1	93996884	93997697	static	Peak_1164	chr1	93996756	93997545	1897	661
chr1	94009662	94010023	static	Peak_1165	chr1	94009902	94010080	1898	121
chr1	94026944	94027433	static	Peak_1166	chr1	94026965	94027452	1899	468
chr1	94033676	94033908	static	Peak_1167	chr1	94033736	94034013	1900	172
chr1	94076421	94076840	dDHS_open	Peak_1168	chr1	94076468	94077878	1902	372
chr1	94077261	94077680	dDHS_open	Peak_1169	chr1	94076468	94077878	1902	419
chr1	94370001	94370200	dDHS_open	Peak_1170	chr1	94370050	94370814	1904	150
chr1	94538210	94538822	static	Peak_1171	chr1	94538332	94538813	1905	481
chr1	94605801	94606260	dDHS_close	Peak_1172	chr1	94605657	94606711	1908	459
chr1	94606919	94607350	static	Peak_1173	chr1	94606870	94607418	1909	431
chr1	94614905	94615184	static	Peak_1174	chr1	94614715	94615144	1910	239
chr1	94620721	94621100	dDHS_close	Peak_1175	chr1	94620678	94621149	1911	379
chr1	94650452	94650652	static	Peak_1176	.	-1	-1	.	0
chr1	94798061	94798374	static	Peak_1177	chr1	94798020	94798718	1916	313
chr1	94800191	94800491	static	Peak_1178	chr1	94800261	94800477	1918	216
chr1	94803306	94804098	static	Peak_1179	chr1	94803265	94804885	1919	792
chr1	94830792	94831448	static	Peak_1180	chr1	94830562	94831603	1925	656
chr1	94833237	94833439	static	Peak_1181	chr1	94833060	94833755	1927	202
chr1	94840495	94841011	static	Peak_1182	chr1	94840029	94840825	1930	330
chr1	94926141	94926380	dDHS_close	Peak_1183	chr1	94925797	94926931	1932	239
chr1	95019796	95020109	static	Peak_1184	chr1	95019782	95020111	1933	313
chr1	95020441	95021100	dDHS_close	Peak_1185	chr1	95020297	95021194	1934	659
chr1	95024801	95025200	dDHS_close	Peak_1186	chr1	95024455	95025695	1935	399
chr1	95029228	95029712	static	Peak_1187	chr1	95029157	95029882	1936	484
chr1	95031587	95032021	static	Peak_1188	chr1	95031333	95032595	1937	434
chr1	95035129	95035556	static	Peak_1189	chr1	95034982	95035597	1939	427
chr1	95039472	95039775	static	Peak_1190	chr1	95039473	95039802	1942	302
chr1	95106861	95107250	static	Peak_1191	chr1	95106881	95107244	1946	363
chr1	95132116	95133007	static	Peak_1192	chr1	95131986	95133325	1950	891
chr1	95239250	95239632	static	Peak_1193	chr1	95239238	95240519	1953	382
chr1	95239638	95239885	static	Peak_1194	chr1	95239238	95240519	1953	247
chr1	95239956	95240442	static	Peak_1195	chr1	95239238	95240519	1953	486
chr1	95296121	95296335	static	Peak_1196	.	-1	-1	.	0
chr1	95328590	95329170	static	Peak_1197	chr1	95328704	95329025	1955	321
chr1	95341641	95342000	dDHS_open	Peak_1198	chr1	95341389	95342560	1956	359
chr1	95350363	95350587	static	Peak_1199	chr1	95350440	95350558	1957	118
chr1	95374881	95375620	dDHS_open	Peak_1200	chr1	95374531	95376321	1959	739
chr1	95408101	95408680	dDHS_open	Peak_1201	chr1	95408012	95409240	1960	579
chr1	95460315	95460637	static	Peak_1202	.	-1	-1	.	0
chr1	95464387	95464611	static	Peak_1203	chr1	95464354	95464577	1962	190
chr1	95531986	95532920	static	Peak_1204	chr1	95531117	95533041	1963	934
chr1	95565326	95565526	static	Peak_1205	chr1	95565338	95565804	1967	188
chr1	95574889	95575369	static	Peak_1206	chr1	95574974	95575309	1968	335
chr1	95583441	95583706	static	Peak_1207	chr1	95583073	95583899	1970	265
chr1	95584615	95585237	static	Peak_1208	chr1	95584514	95585387	1971	622
chr1	95590064	95590383	static	Peak_1209	chr1	95590116	95590965	1972	267
chr1	95590544	95590832	static	Peak_1210	chr1	95590116	95590965	1972	288
chr1	95591490	95591801	static	Peak_1211	chr1	95591448	95591978	1973	311
chr1	95642829	95643234	static	Peak_1212	chr1	95642889	95643125	1975	236
chr1	95651621	95651960	dDHS_open	Peak_1213	chr1	95650522	95652036	1976	339
chr1	95698354	95698793	static	Peak_1214	chr1	95698212	95698870	1977	439
chr1	95700192	95701019	static	Peak_1215	chr1	95700017	95701450	1978	827
chr1	95721641	95722240	dDHS_open	Peak_1216	chr1	95721238	95722319	1980	599
chr1	95931626	95932125	static	Peak_1217	chr1	95931879	95932228	1982	246
chr1	96934988	96935405	static	Peak_1218	chr1	96934898	96935561	1984	417
chr1	97209781	97210617	static	Peak_1219	chr1	97209902	97211035	1985	715
chr1	97347522	97347722	static	Peak_1220	.	-1	-1	.	0
chr1	97348417	97348672	static	Peak_1221	chr1	97348428	97348802	1987	244
chr1	97415937	97416137	static	Peak_1222	.	-1	-1	.	0
chr1	99495601	99496020	dDHS_close	Peak_1223	chr1	99495540	99495989	1991	388
chr1	99504171	99504497	static	Peak_1224	.	-1	-1	.	0
chr1	99511092	99511508	static	Peak_1225	chr1	99511161	99511480	1992	319
chr1	99557252	99557625	static	Peak_1226	.	-1	-1	.	0
chr1	99558124	99558875	static	Peak_1227	.	-1	-1	.	0
chr1	99572243	99572531	static	Peak_1228	chr1	99572344	99572555	1995	187
chr1	99607136	99607336	static	Peak_1229	.	-1	-1	.	0
chr1	99665827	99666127	static	Peak_1230	chr1	99665769	99667454	1996	300
chr1	99666581	99667140	dDHS_open	Peak_1231	chr1	99665769	99667454	1996	559
chr1	99890592	99891088	static	Peak_1232	chr1	99890612	99891063	2000	451
chr1	99992189	99992389	static	Peak_1233	chr1	99991521	99992875	2001	200
chr1	102194961	102195300	dDHS_close	Peak_1234	.	-1	-1	.	0
chr1	102278580	102279009	static	Peak_1235	chr1	102278323	102279275	2004	429
chr1	102307200	102307624	static	Peak_1236	chr1	102307132	102307618	2006	418
chr1	102447859	102448302	static	Peak_1237	chr1	102447701	102448306	2009	443
chr1	102551826	102552196	static	Peak_1238	.	-1	-1	.	0
chr1	102579250	102579817	static	Peak_1239	.	-1	-1	.	0
chr1	102603477	102603994	static	Peak_1240	chr1	102603516	102604032	2012	478
chr1	104630690	104631022	static	Peak_1241	chr1	104630615	104630919	2016	229
chr1	105658742	105659207	static	Peak_1242	chr1	105658676	105659563	2019	465
chr1	106501914	106502449	static	Peak_1243	chr1	106501932	106502250	2020	318
chr1	106835742	106836169	static	Peak_1244	chr1	106835765	106836027	2021	262
chr1	107009314	107010017	static	Peak_1245	chr1	107008989	107010079	2022	703
chr1	107011315	107011814	static	Peak_1246	chr1	107011247	107012310	2023	499
chr1	107075281	107075660	dDHS_close	Peak_1247	chr1	107075227	107076660	2025	379
chr1	107075901	107076280	dDHS_close	Peak_1248	chr1	107075227	107076660	2025	379
chr1	107096048	107096575	static	Peak_1249	chr1	107095990	107096240	2026	192
chr1	107213616	107213816	static	Peak_1250	chr1	107213678	107213847	2027	138
chr1	107253078	107253799	static	Peak_1251	chr1	107252581	107253863	2028	721
chr1	107280941	107281280	dDHS_close	Peak_1252	chr1	107280829	107281576	2030	339
chr1	107559887	107560755	static	Peak_1253	chr1	107559751	107561230	2031	868
chr1	107571378	107571769	static	Peak_1254	.	-1	-1	.	0
chr1	107591947	107592537	static	Peak_1255	.	-1	-1	.	0
chr1	107614947	107615541	static	Peak_1256	chr1	107615009	107615251	2032	242
chr1	107781864	107782091	static	Peak_1257	chr1	107781738	107781924	2033	60
chr1	107787779	107788173	static	Peak_1258	chr1	107787690	107788132	2034	353
chr1	107797541	107797780	dDHS_open	Peak_1259	chr1	107796804	107798120	2035	239
chr1	107802766	107803302	static	Peak_1260	chr1	107802487	107803362	2037	536
chr1	107804875	107805589	static	Peak_1261	chr1	107804656	107805534	2038	659
chr1	107821412	107821736	static	Peak_1262	chr1	107821386	107822733	2039	324
chr1	107821976	107822886	static	Peak_1263	chr1	107821386	107822733	2039	757
chr1	107823601	107823800	dDHS_close	Peak_1264	chr1	107823485	107823899	2041	199
chr1	107850441	107851065	static	Peak_1265	chr1	107850256	107851024	2042	583
chr1	107868332	107868819	static	Peak_1266	chr1	107868187	107868641	2044	309
chr1	107874021	107874640	dDHS_open	Peak_1267	chr1	107874079	107874627	2045	548
chr1	107886658	107887384	static	Peak_1268	.	-1	-1	.	0
chr1	108051965	108052262	static	Peak_1269	chr1	108051746	108052160	2052	195
chr1	108052316	108052544	static	Peak_1270	.	-1	-1	.	0
chr1	108067675	108068496	static	Peak_1271	.	-1	-1	.	0
chr1	108085518	108085777	static	Peak_1272	chr1	108085393	108085721	2056	203
chr1	108089534	108090128	static	Peak_1273	chr1	108089400	108090090	2057	556
chr1	108097346	108097700	static	Peak_1274	chr1	108097467	108097662	2060	195
chr1	108128992	108129453	static	Peak_1275	chr1	108129055	108129375	2062	320
chr1	108137781	108138007	static	Peak_1276	chr1	108137625	108137870	2063	89
chr1	108153629	108154284	static	Peak_1277	chr1	108153735	108154196	2064	461
chr1	108164631	108164831	static	Peak_1278	chr1	108164523	108164992	2065	200
chr1	108176877	108177219	static	Peak_1279	chr1	108176869	108177110	2066	233
chr1	108599427	108599775	static	Peak_1280	chr1	108599363	108599802	2070	348
chr1	108610540	108610792	static	Peak_1281	chr1	108610486	108611031	2071	252
chr1	108655948	108656753	static	Peak_1282	chr1	108655285	108656752	2072	804
chr1	108671258	108671492	static	Peak_1283	.	-1	-1	.	0
chr1	108671538	108671912	static	Peak_1284	chr1	108671526	108671852	2075	314
chr1	108692827	108693639	static	Peak_1285	chr1	108692729	108693539	2076	712
chr1	109456066	109456488	static	Peak_1286	chr1	109456180	109456383	2077	203
chr1	109486160	109486681	static	Peak_1287	chr1	109486211	109487032	2078	470
chr1	109510532	109511188	static	Peak_1288	chr1	109510582	109511090	2079	508
chr1	109534616	109535033	static	Peak_1289	chr1	109534664	109534942	2080	278
chr1	109536841	109537240	dDHS_close	Peak_1290	chr1	109536802	109537210	2081	369
chr1	109541728	109542036	static	Peak_1291	chr1	109541696	109542037	2082	308
chr1	109813631	109813831	static	Peak_1292	chr1	109813669	109813922	2083	162
chr1	109834041	109834405	static	Peak_1293	chr1	109833984	109834592	2084	364
chr1	109834916	109835116	static	Peak_1294	chr1	109834829	109835175	2085	200
chr1	109838501	109838899	static	Peak_1295	chr1	109838276	109838883	2087	382
chr1	111265921	111266420	dDHS_close	Peak_1296	chr1	111265922	111266317	2090	395
chr1	111368404	111368604	static	Peak_1297	chr1	111368341	111368551	2091	147
chr1	111417167	111417367	static	Peak_1298	.	-1	-1	.	0
chr1	113761142	113761812	static	Peak_1299	chr1	113760739	113761780	2092	638
chr1	118493262	118493474	static	Peak_1300	.	-1	-1	.	0
chr1	120207921	120208220	dDHS_open	Peak_1301	chr1	120207429	120208228	2097	299
chr1	120218138	120218726	static	Peak_1302	chr1	120217959	120218856	2098	588
chr1	120231579	120232386	static	Peak_1303	chr1	120231334	120232343	2099	764
chr1	120246538	120246966	static	Peak_1304	chr1	120246515	120246917	2100	379
chr1	120251635	120251842	static	Peak_1305	.	-1	-1	.	0
chr1	120265654	120266077	static	Peak_1306	chr1	120265692	120266170	2101	385
chr1	120285348	120286152	static	Peak_1307	.	-1	-1	.	0
chr1	120355300	120356202	static	Peak_1308	chr1	120355463	120356578	2103	739
chr1	120466261	120466640	dDHS_open	Peak_1309	.	-1	-1	.	0
chr1	120486492	120486787	static	Peak_1310	chr1	120486433	120486872	2107	295
chr1	120491661	120492240	dDHS_close	Peak_1311	chr1	120491981	120492414	2109	259
chr1	120494345	120494614	static	Peak_1312	chr1	120494294	120494439	2110	94
chr1	120510118	120510852	static	Peak_1313	chr1	120510160	120510881	2111	692
chr1	120524190	120524768	static	Peak_1314	chr1	120524177	120525058	2112	578
chr1	120555287	120555508	static	Peak_1315	.	-1	-1	.	0
chr1	120620208	120620553	static	Peak_1316	chr1	120620136	120620590	2114	345
chr1	120637744	120638275	static	Peak_1317	chr1	120637687	120638274	2115	530
chr1	120708784	120709136	static	Peak_1318	chr1	120708753	120709425	2117	352
chr1	120863225	120864294	static	Peak_1319	chr1	120863588	120864151	2119	563
chr1	120864577	120864807	static	Peak_1320	chr1	120864482	120864904	2120	230
chr1	120915725	120915984	static	Peak_1321	chr1	120915675	120915972	2121	247
chr1	120918764	120919241	static	Peak_1322	chr1	120918860	120919189	2122	329
chr1	120927793	120928085	static	Peak_1323	chr1	120927790	120928083	2123	290
chr1	120984139	120984352	static	Peak_1324	chr1	120984264	120984506	2125	88
chr1	121043286	121043692	static	Peak_1325	chr1	121043217	121043636	2126	350
chr1	121060001	121060320	dDHS_close	Peak_1326	chr1	121059816	121060735	2127	319
chr1	121069734	121070398	static	Peak_1327	chr1	121069725	121070643	2128	664
chr1	121087569	121088190	static	Peak_1328	chr1	121087589	121088182	2129	593
chr1	121106306	121106622	static	Peak_1329	chr1	121106254	121106753	2130	316
chr1	121116377	121116902	static	Peak_1330	chr1	121116334	121116817	2132	440
chr1	121117607	121117969	static	Peak_1331	chr1	121117631	121118179	2133	338
chr1	121131015	121131536	static	Peak_1332	chr1	121130968	121131468	2135	453
chr1	121145283	121145736	static	Peak_1333	chr1	121145190	121145940	2137	453
chr1	121149815	121150434	static	Peak_1334	chr1	121149999	121150483	2138	435
chr1	121189101	121189620	dDHS_close	Peak_1335	chr1	121188738	121189557	2141	456
chr1	121190286	121190848	static	Peak_1336	chr1	121190159	121191048	2142	562
chr1	121191693	121192060	static	Peak_1337	chr1	121191417	121192211	2143	367
chr1	121196668	121196951	static	Peak_1338	chr1	121196946	121197143	2144	5
chr1	121198904	121199361	static	Peak_1339	chr1	121198811	121199322	2146	418
chr1	121388590	121389083	static	Peak_1340	chr1	121388612	121389166	2147	471
chr1	121401080	121401861	static	Peak_1341	chr1	121400753	121401957	2149	781
chr1	121415395	121415737	static	Peak_1342	chr1	121415486	121415679	2152	193
chr1	121422603	121423110	static	Peak_1343	.	-1	-1	.	0
chr1	121437540	121438038	static	Peak_1344	chr1	121437526	121438051	2156	498
chr1	121448243	121448793	static	Peak_1345	chr1	121448238	121448504	2157	261
chr1	121454198	121455051	static	Peak_1346	chr1	121454442	121455071	2158	609
chr1	121461981	121462360	dDHS_close	Peak_1347	chr1	121462068	121462650	2159	292
chr1	121486564	121486953	static	Peak_1348	chr1	121486689	121486937	2160	248
chr1	121499014	121499259	static	Peak_1349	.	-1	-1	.	0
chr1	121533770	121534463	static	Peak_1350	chr1	121533865	121534244	2161	379
chr1	121536685	121536976	static	Peak_1351	.	-1	-1	.	0
chr1	121544895	121545702	static	Peak_1352	chr1	121544895	121545821	2163	807
chr1	121563473	121564118	static	Peak_1353	chr1	121563523	121563886	2164	363
chr1	121733919	121734489	static	Peak_1354	chr1	121733704	121734516	2165	570
chr1	121803750	121804238	static	Peak_1355	chr1	121803871	121804180	2167	309
chr1	121809401	121810082	static	Peak_1356	chr1	121809514	121810137	2168	568
chr1	121921265	121921492	static	Peak_1357	chr1	121921353	121921536	2169	139
chr1	121929656	121930145	static	Peak_1358	chr1	121929457	121930092	2171	436
chr1	121933712	121934418	static	Peak_1359	chr1	121933652	121934333	2172	621
chr1	121957228	121957625	static	Peak_1360	chr1	121957235	121957643	2174	390
chr1	121960615	121960883	static	Peak_1361	chr1	121960660	121961043	2176	223
chr1	121962743	121963116	static	Peak_1362	chr1	121962305	121963112	2177	369
chr1	121969414	121969846	static	Peak_1363	chr1	121969262	121970949	2179	432
chr1	121970231	121970884	static	Peak_1364	chr1	121969262	121970949	2179	653
chr1	121990033	121990426	static	Peak_1365	chr1	121990083	121990409	2181	326
chr1	121994961	121995161	static	Peak_1366	chr1	121994932	121995161	2182	200
chr1	121996873	121997563	static	Peak_1367	chr1	121996999	121997529	2183	530
chr1	122012277	122013022	static	Peak_1368	chr1	122011998	122013260	2185	745
chr1	122016638	122017156	static	Peak_1369	.	-1	-1	.	0
chr1	122017307	122018200	static	Peak_1370	.	-1	-1	.	0
chr1	122021450	122021832	static	Peak_1371	chr1	122021437	122021868	2187	382
chr1	122039261	122039519	static	Peak_1372	chr1	122039160	122039488	2189	227
chr1	122058992	122059484	static	Peak_1373	.	-1	-1	.	0
chr1	122161589	122162120	static	Peak_1374	chr1	122161259	122162408	2191	531
chr1	122166860	122167248	static	Peak_1375	chr1	122166523	122167200	2192	340
chr1	122483251	122483451	static	Peak_1376	.	-1	-1	.	0
chr1	122551341	122552080	dDHS_close	Peak_1377	chr1	122551396	122552160	2193	684
chr1	122745961	122746400	dDHS_close	Peak_1378	chr1	122745903	122746341	2194	380
chr1	123140441	123140820	dDHS_close	Peak_1379	chr1	123140252	123140866	2196	379
chr1	123224221	123224580	dDHS_open	Peak_1380	chr1	123223442	123225058	2197	359
chr1	123225977	123226557	static	Peak_1381	chr1	123225882	123226590	2198	580
chr1	123226921	123227500	dDHS_close	Peak_1382	chr1	123226769	123227515	2199	579
chr1	123228921	123229760	dDHS_close	Peak_1383	chr1	123228934	123229813	2202	826
chr1	123232309	123232809	static	Peak_1384	chr1	123232364	123233254	2204	445
chr1	123245359	123246302	static	Peak_1385	chr1	123245394	123246024	2205	630
chr1	123247200	123247756	static	Peak_1386	chr1	123247066	123247720	2207	520
chr1	123287040	123287653	static	Peak_1387	chr1	123287076	123287566	2208	490
chr1	123327223	123327959	static	Peak_1388	chr1	123327461	123328528	2209	498
chr1	123464168	123464932	static	Peak_1389	chr1	123464146	123464831	2210	663
chr1	124105376	124105646	static	Peak_1390	chr1	124105252	124105550	2211	174
chr1	124253601	124253980	dDHS_open	Peak_1391	chr1	124253654	124254002	2212	326
chr1	124582174	124582700	static	Peak_1392	.	-1	-1	.	0
chr1	125830735	125831134	static	Peak_1393	.	-1	-1	.	0
chr1	127293291	127293611	static	Peak_1394	chr1	127293433	127293621	2214	178
chr1	127331993	127332659	static	Peak_1395	chr1	127331229	127333010	2216	666
chr1	127367439	127367995	static	Peak_1396	.	-1	-1	.	0
chr1	127385924	127386208	static	Peak_1397	chr1	127385929	127386202	2217	273
chr1	127415639	127416306	static	Peak_1398	chr1	127415609	127416466	2218	667
chr1	127448230	127448523	static	Peak_1399	chr1	127448246	127448499	2219	253
chr1	127456797	127457781	static	Peak_1400	.	-1	-1	.	0
chr1	127559749	127559987	static	Peak_1401	chr1	127559672	127560038	2222	238
chr1	127573379	127573929	static	Peak_1402	chr1	127573146	127574589	2224	550
chr1	127590938	127591435	static	Peak_1403	chr1	127590866	127591336	2226	398
chr1	127612809	127613182	static	Peak_1404	chr1	127612891	127613151	2227	260
chr1	127656643	127656920	static	Peak_1405	chr1	127656599	127656976	2230	277
chr1	127864330	127864848	static	Peak_1406	chr1	127864363	127864859	2231	485
chr1	128197961	128198280	dDHS_close	Peak_1407	chr1	128197744	128198319	2233	319
chr1	128263178	128263864	static	Peak_1408	chr1	128263317	128263673	2234	356
chr1	128308014	128308332	static	Peak_1409	chr1	128308068	128308495	2236	264
chr1	128333856	128334125	static	Peak_1410	chr1	128333932	128334132	2237	193
chr1	128358416	128358629	static	Peak_1411	.	-1	-1	.	0
chr1	128489594	128490250	static	Peak_1412	chr1	128489582	128490512	2239	656
chr1	128494093	128494355	static	Peak_1413	.	-1	-1	.	0
chr1	128501146	128501648	static	Peak_1414	chr1	128500928	128501501	2240	355
chr1	128518859	128519119	static	Peak_1415	.	-1	-1	.	0
chr1	128569736	128570322	static	Peak_1416	chr1	128569811	128570260	2241	449
chr1	128725675	128725875	static	Peak_1417	.	-1	-1	.	0
chr1	128727225	128727586	static	Peak_1418	chr1	128727009	128727505	2242	280
chr1	128942501	128942740	dDHS_open	Peak_1419	chr1	128942281	128942948	2244	239
chr1	129101204	129101950	static	Peak_1420	chr1	129101296	129102196	2245	654
chr1	129153728	129153962	static	Peak_1421	chr1	129153598	129153870	2247	142
chr1	129174763	129175024	static	Peak_1422	chr1	129174742	129175005	2248	242
chr1	129251691	129252186	static	Peak_1423	chr1	129251643	129252599	2250	495
chr1	129252230	129252475	static	Peak_1424	chr1	129251643	129252599	2250	245
chr1	129260313	129260554	static	Peak_1425	chr1	129260242	129260614	2251	241
chr1	129294134	129294624	static	Peak_1426	chr1	129293914	129294542	2252	408
chr1	129294803	129295215	static	Peak_1427	chr1	129294769	129295223	2253	412
chr1	129492480	129492694	static	Peak_1428	.	-1	-1	.	0
chr1	129625600	129626069	static	Peak_1429	chr1	129625512	129626158	2257	469
chr1	129628983	129629489	static	Peak_1430	chr1	129628676	129629647	2259	506
chr1	129631929	129632245	static	Peak_1431	chr1	129631989	129632400	2260	256
chr1	129647007	129647652	static	Peak_1432	chr1	129647158	129647635	2262	477
chr1	129652423	129652738	static	Peak_1433	chr1	129652379	129652733	2263	310
chr1	129670961	129671240	dDHS_open	Peak_1434	chr1	129669689	129671475	2264	279
chr1	129672980	129673180	static	Peak_1435	chr1	129672892	129673281	2265	200
chr1	129765089	129765777	static	Peak_1436	chr1	129765041	129765839	2266	688
chr1	129848862	129849217	static	Peak_1437	chr1	129848871	129849230	2268	346
chr1	129886287	129887005	static	Peak_1438	chr1	129886413	129886795	2269	382
chr1	129970566	129970996	static	Peak_1439	chr1	129970627	129970957	2273	330
chr1	129977541	129978258	static	Peak_1440	chr1	129977966	129978218	2275	252
chr1	129998945	130000015	static	Peak_1441	chr1	129998836	130000652	2277	1070
chr1	130131776	130132269	static	Peak_1442	chr1	130131701	130132103	2278	327
chr1	130140497	130141217	static	Peak_1443	chr1	130140171	130141803	2279	720
chr1	130142015	130142303	static	Peak_1444	.	-1	-1	.	0
chr1	130256112	130256554	static	Peak_1445	chr1	130255512	130256762	2280	442
chr1	130312939	130313144	static	Peak_1446	.	-1	-1	.	0
chr1	130313161	130314317	static	Peak_1447	chr1	130313146	130314515	2281	1156
chr1	130337277	130337499	static	Peak_1448	.	-1	-1	.	0
chr1	130353527	130354053	static	Peak_1449	chr1	130353504	130353958	2282	431
chr1	130488905	130489372	static	Peak_1450	chr1	130488656	130489231	2285	326
chr1	130604535	130604959	static	Peak_1451	chr1	130604795	130605078	2289	164
chr1	130716471	130716672	static	Peak_1452	.	-1	-1	.	0
chr1	130723021	130723500	dDHS_close	Peak_1453	chr1	130722676	130723785	2290	479
chr1	130728939	130729402	static	Peak_1454	chr1	130729079	130729479	2291	323
chr1	131147121	131147900	dDHS_open	Peak_1455	chr1	131147253	131147787	2292	534
chr1	131356740	131356940	static	Peak_1456	.	-1	-1	.	0
chr1	132206312	132206729	static	Peak_1457	chr1	132206402	132206644	2294	242
chr1	132270024	132270564	static	Peak_1458	chr1	132269956	132270590	2295	540
chr1	132409434	132409766	static	Peak_1459	chr1	132409453	132409781	2300	313
chr1	132530659	132531186	static	Peak_1460	chr1	132530613	132530876	2301	217
chr1	132534532	132534867	static	Peak_1461	chr1	132534493	132534824	2302	292
chr1	132554623	132554994	static	Peak_1462	chr1	132554578	132554874	2303	251
chr1	132557923	132558664	static	Peak_1463	chr1	132557977	132558459	2304	482
chr1	132574903	132575671	static	Peak_1464	chr1	132574841	132575600	2306	697
chr1	132612130	132612854	static	Peak_1465	.	-1	-1	.	0
chr1	132613901	132614200	dDHS_open	Peak_1466	.	-1	-1	.	0
chr1	132620711	132621093	static	Peak_1467	.	-1	-1	.	0
chr1	132630299	132630994	static	Peak_1468	chr1	132630084	132631216	2316	695
chr1	132657921	132658553	static	Peak_1469	chr1	132657751	132658537	2319	616
chr1	132660648	132661051	static	Peak_1470	chr1	132660359	132661160	2320	403
chr1	132663515	132664036	static	Peak_1471	chr1	132663545	132664057	2321	491
chr1	132673403	132673628	static	Peak_1472	.	-1	-1	.	0
chr1	132694584	132695459	static	Peak_1473	chr1	132694522	132695420	2323	836
chr1	132717556	132717813	static	Peak_1474	chr1	132717284	132717997	2325	257
chr1	132718501	132719213	static	Peak_1475	chr1	132718443	132719319	2326	712
chr1	132723106	132723616	static	Peak_1476	chr1	132723014	132723588	2328	482
chr1	132725225	132725649	static	Peak_1477	chr1	132725216	132725693	2329	424
chr1	132728833	132729217	static	Peak_1478	chr1	132728716	132729227	2332	384
chr1	132731732	132732425	static	Peak_1479	chr1	132731718	132732380	2333	648
chr1	132737431	132738058	static	Peak_1480	chr1	132737135	132738502	2334	627
chr1	132754121	132754597	static	Peak_1481	chr1	132754351	132754602	2336	246
chr1	132946154	132946364	static	Peak_1482	.	-1	-1	.	0
chr1	132965117	132965317	static	Peak_1483	.	-1	-1	.	0
chr1	132968944	132969227	static	Peak_1484	chr1	132968789	132969478	2340	283
chr1	132980047	132981145	static	Peak_1485	chr1	132980042	132981408	2344	1098
chr1	132983626	132983826	static	Peak_1486	chr1	132983326	132984057	2345	200
chr1	132986751	132987130	static	Peak_1487	.	-1	-1	.	0
chr1	132990520	132990894	static	Peak_1488	chr1	132990312	132991376	2348	374
chr1	132994249	132994541	static	Peak_1489	chr1	132993044	132994771	2349	292
chr1	133012487	133012749	static	Peak_1490	chr1	133012593	133012784	2350	156
chr1	133017581	133017781	static	Peak_1491	chr1	133017482	133017737	2352	156
chr1	133022527	133023334	static	Peak_1492	chr1	133022536	133023354	2354	798
chr1	133034548	133035274	static	Peak_1493	chr1	133034676	133035185	2355	509
[truncated: 41,794 more rows]

## Sheet: 5E_MHx+GH30
Supplementary File 5E - MHx+GH 30 min/MHx liver DHS overlap with the set of 70,211 DHS. Merged list of 33,241 DHS regions was generated based on the MACS2 peaks called in each DNase-seq replicate sample (see Methods) and assigned a unique name (DHS Peak Number, column E). The genomic position of DHS region is listed in columns A-C, its DHS response in column D, and its overlapping DHS region in t…
[truncated: 33,243 more rows]

[truncated: 4 more sheets: 5F_MHx+GH90, 5G_MHx+GH240, 5H_Sex-biased DHS_Hx responses, 5I_Hypox DHS enrichments]
