# Supplementary material for: Plasma growth hormone pulses induce male-biased pulsatile chromatin opening and epigenetic regulation in adult mouse liver
Source: eLife. 2023 Dec 13;12:RP91367. doi: 10.7554/eLife.91367 (PMC10721219; doi:10.7554/eLife.91367)
Supplement: Supplementary file 7. — (A) Summary of genomic regions with transcription factor binding or with histone marks used for DHS enrichment calculations. (B) Summary of DHS enrichment calculations for the biologically relevant regions defined in sheet A. (C) Full listing of DHS enrichment calculations shown in sheet B. Shown is the calculated enrichment score (ES), the number and percent of overlapping DHS, the number and percent of overlapping background DHS, and Fisher’s exact test p-value for the overlap between the DHS and each set of biologically relevant regions. (D–F) Coordinates for each of the sex-biased transcription factor binding sites (D) and chromatin mark regions in male liver (E) and in female liver (F), as defined in sheet A. [file elife-91367-supp7.xlsx]

## Sheet: 7A_Datasets Summary
Supplementary File 7A - Summary of genomic regions with transcription factor binding or with histone marks used for DHS enrichment calculations. Enrichment calculations were performed using the following sets of DHS: (1) dynamic male DHS (834 sites), (2) static male DHS (1,895 sites), (3) dynamic sex-independent DHS (1,532 sites), and (4) static female DHS (1,359 sites) with static sex-independen…
Sex-biased transcription factor binding (as determined by ChIP-seq)				Publication used to extract genomic sites: Sugathan A, Waxman DJ. Genome-wide analysis of chromatin states reveals distinct mechanisms of sex-dependent gene regulation in male and female mouse liver. Mol Cell Biol. 2013 Sep;33(18):3594-610. doi: 10.1128/MCB.00280-13. Epub 2013 Jul 8. PubMed PMID: 23836885; PubMed Central PMCID: PMC3753870.
Set of genomic regions	Number of sites	Publication used as source for these ChIP-seq datasets		Sex-biased chromatin marks			Chromatin states in male liver		Chromatin states in female liver
STAT5-High (Male)	1093	Zhang Y, Laz EV, Waxman DJ. Dynamic, sex-differential STAT5 and BCL6 binding to sex-biased, growth hormone-regulated genes in adult mouse liver. Mol Cell Biol. 2012 Feb;32(4):880-96. doi: 10.1128/MCB.06312-11. Epub 2011 Dec 12. PubMed PMID: 22158971; PubMed Central PMCID: PMC3272977.		Name of genomic sites	Number of sites		Name of genomic sites	Number of sites	Name of genomic sites	Number of sites
STAT5-High (Female)	1174			K27ac (Male)	713		E1	26384	E1	34280
Bcl6 (Male)	6432			K4me1 (Male)	6098		E2	48529	E2	53934
Cux2 (Female)	1471	Conforto TL, Zhang Y, Sherman J, Waxman DJ. Impact of CUX2 on the female mouse liver transcriptome: activation of female-biased genes and repression of male-biased genes. Mol Cell Biol. 2012 Nov;32(22):4611-27. doi: 10.1128/MCB.00886-12. Epub 2012 Sep 10. PubMed PMID: 22966202; PubMed Central PMCID: PMC3486175.		K4me3 (Male)	714		E3	18221	E3	23160
FoxA1 (Male)	3280	Li Z, Tuteja G, Schug J, Kaestner KH. Foxa1 and Foxa2 are essential for sexual dimorphism in liver cancer. Cell. 2012 Jan 20;148(1-2):72-83. doi: 10.1016/j.cell.2011.11.026. PubMed PMID: 22265403; PubMed Central PMCID: PMC3266536.		K9me3 (Male)	372		E4	1036	E4	1014
FoxA1 (Female)	577			K27me3 (Male)	160		E5	24280	E5	17937
FoxA2 (Male)	976			K36me3 (Male)	142		E6	44749	E6	39705
FoxA2 (Female)	780			K27ac (Female)	1157		E7	18606	E7	18000
				K4me1 (Female)	3219		E8	17779	E8	18731
				K4me3 (Female)	237		E9	66054	E9	62610
				K9me3 (Female)	394		E10	41853	E10	28744
				K27me3 (Female)	8		E11	45059	E11	66618
				K36me3 (Female)	86		E12	18917	E12	25190
							E13	77380	E13	82249
							E14	25515	E14	24169

## Sheet: 7B_DHS_Enrichments data
Supplementary File 7B - Summary of DHS enrichment calculations for the biologically relevant regions defined in sheet 7A. Enrichment calculations were performed using the following sets of DHS: (1) dynamic male DHS (834 sites), (2) static male DHS (1,895 sites), (3) dynamic sex-independent DHS (1,532 sites), and (4) static female DHS (1,359 sites) with static sex-independent DHS (64,584 sites) as…
Sex-biased transcription factor binding		dynamic male DHS (834 sites)		static male DHS (1,895 sites)		dynamic sex-indep. DHS (1,532 sites)		static female DHS (1,359 sites)
Name of genomic sites	Number of sites	ES	P-value	ES	P-value	ES	P-value	ES	P-value
STAT5-High (Male)	1093	58.51	2.7e-302	23.78	4.63e-191	8.68	8.98e-36	0	0.00377
STAT5-High (Female)	1174	1.24	0.494	0.35	0.00175	6	8.54e-42	6.49	5.68e-43
Bcl6 (Male)	6432	2	5.94e-15	1.3	0.000157	3.02	2.43e-86	0.74	0.00272
Cux2 (Female)	1471	3.15	3.09e-09	4.61	7.82e-41	2.13	5.94e-06	0.94	0.907
FoxA1 (Male)	3280	3.74	1.26e-23	6.09	7.15e-132	1.62	0.000228	0.58	0.00993
FoxA1 (Female)	577	0	0.0183	0	3.46e-05	0.44	0.123	1.36	0.285
FoxA2 (Male)	976	21.16	1.29e-45	44.32	2.88e-253	1.15	0.628	0.26	0.193
FoxA2 (Female)	780	0.96	1	0.14	0.0116	2.43	0.00295	18.19	3.73e-76
Sex-biased chromatin marks		dynamic male DHS (834 sites)		static male DHS (1,895 sites)		dynamic sex-indep. DHS (1,532 sites)		static female DHS (1,359 sites)
Name of genomic sites	Number of sites	ES	P-value	ES	P-value	ES	P-value	ES	P-value
K27ac (Male)	713	25.3	1.21e-80	41.46	0	1.66	0.144	0.37	0.185
K4me1 (Male)	6098	18.16	3.14e-140	22.17	0	2.67	2e-08	0.62	0.18
K4me3 (Male)	714	3.31	2.27e-06	4.9	1.97e-26	0.57	0.185	0.37	0.0411
K9me3 (Male)	372	0	0.278	1.48	0.344	0.26	0.192	2.95	0.00306
K27me3 (Male)	160	0.63	1	3.6	0.000148	4.8	4.06e-06	37.09	3.95e-101
K36me3 (Male)	142	3.87	0.236	25.56	1.2e-14	0	1	4.75	0.0747
K27ac (Female)	1157	0	0.00111	0.12	2.06e-05	2.52	3.27e-06	20.46	2.87e-213
K4me1 (Female)	3219	0.11	0.00204	0	2.04e-09	0.3	0.00158	17.59	6.71e-215
K4me3 (Female)	237	0	0.191	0	0.00498	1.69	0.157	13.07	4.17e-39
K9me3 (Female)	394	21.68	1.36e-07	10.91	3.16e-06	1.69	0.456	0	1
K27me3 (Female)	8	0	1	0	1	0	1	0	1
K36me3 (Female)	86	0	1	0	1	4.68	0.0774	36.96	7.79e-16
Chromatin states in male liver		dynamic male DHS (834 sites)		static male DHS (1,895 sites)		dynamic sex-indep. DHS (1,532 sites)		static female DHS (1,359 sites)
Name of genomic sites	Number of sites	ES	P-value	ES	P-value	ES	P-value	ES	P-value
E1	26384	0.05	2.95e-07	0.48	0.000232	0.03	1.15e-13	4.74	5.99e-50
E2	48529	0.17	1.36e-06	0.65	0.00882	0.05	2.33e-16	3.8	1.44e-40
E3	18221	0	0.63	2.98	0.0122	0	0.268	2.38	0.0957
E4	1036	1.05	0.831	1.54	0.0666	1.14	0.637	5.36	3.69e-20
E5	24280	0.62	9.06e-11	0.88	0.0032	0.51	3.5e-30	0.57	2.45e-21
E6	44749	1.79	4.16e-92	1.46	1.17e-66	1.83	2.61e-184	0.56	1.15e-47
E7	18606	0.25	6.95e-41	0.24	5.55e-94	0.59	3.87e-20	0.11	2.63e-101
E8	17779	0.09	1.93e-25	0.21	1.8e-38	0.41	6.35e-16	0.34	1.5e-18
E9	66054	1.18	0.0178	0.87	0.0112	1.61	1.85e-24	1.29	2.24e-06
E10	41853	0.37	1.96e-07	0.6	2.23e-06	0.57	5.43e-06	1.83	2.22e-12
E11	45059	1.14	0.276	1.05	0.585	0.77	0.0114	2.19	1.65e-25
E12	18917	0.75	0.0281	1.2	0.0108	0.62	2.96e-06	1.99	1.63e-22
E13	77380	0.32	5.05e-09	0.46	2.09e-11	0.32	1.69e-15	2.26	2.04e-25
E14	25515	0.06	9.05e-07	0.53	0.00222	0	2.72e-14	1.35	0.0689
Chromatin states in female liver		dynamic male DHS (834 sites)		static male DHS (1,895 sites)		dynamic sex-indep. DHS (1,532 sites)		static female DHS (1,359 sites)
Name of genomic sites	Number of sites	ES	P-value	ES	P-value	ES	P-value	ES	P-value
E1	34280	0.85	0.638	1.44	0.00623	0.12	1.06e-10	0.49	0.00286
E2	53934	6.19	6.86e-47	8.73	4e-183	0.46	0.00145	0.48	0.00408
E3	23160	0	1	2.7	0.0447	0	0.408	0	0.643
E4	1014	1.52	0.169	2.61	3.66e-07	1.24	0.38	0.37	0.0404
E5	17937	0.26	3.4e-33	0.27	8.32e-70	0.52	1.89e-23	0.88	0.0322
E6	39705	1	0.944	0.54	8.49e-68	1.7	1.33e-118	1.22	1.37e-11
E7	18000	0.13	1.23e-56	0.05	5.66e-161	0.53	1.18e-24	0.32	1.59e-48
E8	18731	0.22	3.79e-21	0.26	4.49e-41	0.58	4.43e-10	0.2	9.82e-36
E9	62610	2.42	1.55e-69	1.47	9.9e-21	2.24	1.48e-96	0.76	1.05e-05
E10	28744	2.89	1.79e-18	2.64	6.77e-31	1.35	0.0117	0.51	0.000194
E11	66618	1.43	1.04e-06	1.83	6.24e-41	0.89	0.0925	1.45	9.77e-11
E12	25190	0.85	0.153	0.84	0.0111	0.57	3.23e-10	1.34	1.95e-05
E13	82249	1.71	7.3e-06	2.85	1.41e-54	0.44	9.3e-09	0.61	0.000399
E14	24169	1.19	0.538	3.1	1.07e-16	0.15	5.46e-06	0.28	0.000891

## Sheet: 7C_ES calculations
Supplementary File 7C - Full listing of DHS enrichment calculations as shown in sheet 7B. Enrichment calculations were performed using the following sets of DHS: (1) dynamic male DHS (834 sites), (2) static male DHS (1,895 sites), (3) dynamic sex-independent DHS (1,532 sites), and (4) static female DHS (1,359 sites) with static sex-independent DHS (64,584 sites) as the background. Shown is the ca…
Sex-biased transcription factor binding		dynamic male DHS (834 sites)				static male DHS (1,895 sites)				dynamic sex-indep. DHS (1,532 sites)				static female DHS (1,359 sites)
Name of genomic sites	Number of sites	ES	Number of overlapping DHS (%)	Number of background sites overlapping (%)	P-value	ES	Number of overlapping DHS (%)	Number of background sites overlapping (%)	P-value	ES	Number of overlapping DHS (%)	Number of background sites overlapping (%)	P-value	ES	Number of overlapping DHS (%)	Number of background sites overlapping (%)	P-value
STAT5-High (Male)	1093	58.51	235 (28.2%)	311 (0.482%)	2.7e-302	23.78	217 (11.5%)	311 (0.482%)	4.63e-191	8.68	64 (4.18%)	311 (0.482%)	8.98e-36	0	0 (0%)	311 (0.482%)	0.00377
STAT5-High (Female)	1174	1.24	11 (1.32%)	688 (1.07%)	0.494	0.35	7 (0.369%)	688 (1.07%)	0.00175	6	98 (6.4%)	688 (1.07%)	8.54e-42	6.49	94 (6.92%)	688 (1.07%)	5.68e-43
Bcl6 (Male)	6432	2	143 (17.1%)	5537 (8.57%)	5.94e-15	1.3	211 (11.1%)	5537 (8.57%)	0.000157	3.02	397 (25.9%)	5537 (8.57%)	2.43e-86	0.74	86 (6.33%)	5537 (8.57%)	0.00272
Cux2 (Female)	1471	3.15	37 (4.44%)	909 (1.41%)	3.09e-09	4.61	123 (6.49%)	909 (1.41%)	7.82e-41	2.13	46 (3%)	909 (1.41%)	5.94e-06	0.94	18 (1.32%)	909 (1.41%)	0.907
FoxA1 (Male)	3280	3.74	83 (9.95%)	1718 (2.66%)	1.26e-23	6.09	307 (16.2%)	1718 (2.66%)	7.15e-132	1.62	66 (4.31%)	1718 (2.66%)	0.000228	0.58	21 (1.55%)	1718 (2.66%)	0.00993
FoxA1 (Female)	577	0	0 (0%)	384 (0.595%)	0.0183	0	0 (0%)	384 (0.595%)	3.46e-05	0.44	4 (0.261%)	384 (0.595%)	0.123	1.36	11 (0.809%)	384 (0.595%)	0.285
FoxA2 (Male)	976	21.16	50 (6%)	183 (0.283%)	1.29e-45	44.32	238 (12.6%)	183 (0.283%)	2.88e-253	1.15	5 (0.326%)	183 (0.283%)	0.628	0.26	1 (0.0736%)	183 (0.283%)	0.193
FoxA2 (Female)	780	0.96	3 (0.36%)	243 (0.376%)	1	0.14	1 (0.0528%)	243 (0.376%)	0.0116	2.43	14 (0.914%)	243 (0.376%)	0.00295	18.19	93 (6.84%)	243 (0.376%)	3.73e-76
Sex-biased chromatin marks		dynamic male DHS (834 sites)				static male DHS (1,895 sites)				dynamic sex-indep. DHS (1,532 sites)				static female DHS (1,359 sites)
Name of genomic sites	Number of sites	ES	Number of overlapping DHS (%)	Number of background sites overlapping (%)	P-value	ES	Number of overlapping DHS (%)	Number of background sites overlapping (%)	P-value	ES	Number of overlapping DHS (%)	Number of background sites overlapping (%)	P-value	ES	Number of overlapping DHS (%)	Number of background sites overlapping (%)	P-value
K27ac (Male)	713	25.3	83 (9.95%)	254 (0.393%)	1.21e-80	41.46	309 (16.3%)	254 (0.393%)	0	1.66	10 (0.653%)	254 (0.393%)	0.144	0.37	2 (0.147%)	254 (0.393%)	0.185
K4me1 (Male)	6098	18.16	163 (19.5%)	695 (1.08%)	3.14e-140	22.17	452 (23.9%)	695 (1.08%)	0	2.67	44 (2.87%)	695 (1.08%)	2e-08	0.62	9 (0.662%)	695 (1.08%)	0.18
K4me3 (Male)	714	3.31	22 (2.64%)	515 (0.797%)	2.27e-06	4.9	74 (3.91%)	515 (0.797%)	1.97e-26	0.57	7 (0.457%)	515 (0.797%)	0.185	0.37	4 (0.294%)	515 (0.797%)	0.0411
K9me3 (Male)	372	0	0 (0%)	161 (0.249%)	0.278	1.48	7 (0.369%)	161 (0.249%)	0.344	0.26	1 (0.0653%)	161 (0.249%)	0.192	2.95	10 (0.736%)	161 (0.249%)	0.00306
K27me3 (Male)	160	0.63	1 (0.12%)	123 (0.19%)	1	3.6	13 (0.686%)	123 (0.19%)	0.000148	4.8	14 (0.914%)	123 (0.19%)	4.06e-06	37.09	96 (7.06%)	123 (0.19%)	3.95e-101
K36me3 (Male)	142	3.87	1 (0.12%)	20 (0.031%)	0.236	25.56	15 (0.792%)	20 (0.031%)	1.2e-14	0	0 (0%)	20 (0.031%)	1	4.75	2 (0.147%)	20 (0.031%)	0.0747
K27ac (Female)	1157	0	0 (0%)	569 (0.881%)	0.00111	0.12	2 (0.106%)	569 (0.881%)	2.06e-05	2.52	34 (2.22%)	569 (0.881%)	3.27e-06	20.46	245 (18%)	569 (0.881%)	2.87e-213
K4me1 (Female)	3219	0.11	1 (0.12%)	708 (1.1%)	0.00204	0	0 (0%)	708 (1.1%)	2.04e-09	0.3	5 (0.326%)	708 (1.1%)	0.00158	17.59	262 (19.3%)	708 (1.1%)	6.71e-215
K4me3 (Female)	237	0	0 (0%)	200 (0.31%)	0.191	0	0 (0%)	200 (0.31%)	0.00498	1.69	8 (0.522%)	200 (0.31%)	0.157	13.07	55 (4.05%)	200 (0.31%)	4.17e-39
K9me3 (Female)	394	21.68	7 (0.839%)	25 (0.0387%)	1.36e-07	10.91	8 (0.422%)	25 (0.0387%)	3.16e-06	1.69	1 (0.0653%)	25 (0.0387%)	0.456	0	0 (0%)	25 (0.0387%)	1
K27me3 (Female)	8	0	0 (0%)	4 (0.00619%)	1	0	0 (0%)	4 (0.00619%)	1	0	0 (0%)	4 (0.00619%)	1	0	0 (0%)	4 (0.00619%)	1
K36me3 (Female)	86	0	0 (0%)	18 (0.0279%)	1	0	0 (0%)	18 (0.0279%)	1	4.68	2 (0.131%)	18 (0.0279%)	0.0774	36.96	14 (1.03%)	18 (0.0279%)	7.79e-16
Chromatin states in male liver		dynamic male DHS (834 sites)				static male DHS (1,895 sites)				dynamic sex-indep. DHS (1,532 sites)				static female DHS (1,359 sites)
Name of genomic sites	Number of sites	ES	Number of overlapping DHS (%)	Number of background sites overlapping (%)	P-value	ES	Number of overlapping DHS (%)	Number of background sites overlapping (%)	P-value	ES	Number of overlapping DHS (%)	Number of background sites overlapping (%)	P-value	ES	Number of overlapping DHS (%)	Number of background sites overlapping (%)	P-value
E1	26384	0.05	1 (0.12%)	1434 (2.22%)	2.95e-07	0.48	20 (1.06%)	1434 (2.22%)	0.000232	0.03	1 (0.0653%)	1434 (2.22%)	1.15e-13	4.74	143 (10.5%)	1434 (2.22%)	5.99e-50
E2	48529	0.17	4 (0.48%)	1826 (2.83%)	1.36e-06	0.65	35 (1.85%)	1826 (2.83%)	0.00882	0.05	2 (0.131%)	1826 (2.83%)	2.33e-16	3.8	146 (10.7%)	1826 (2.83%)	1.44e-40
E3	18221	0	0 (0%)	80 (0.124%)	0.63	2.98	7 (0.369%)	80 (0.124%)	0.0122	0	0 (0%)	80 (0.124%)	0.268	2.38	4 (0.294%)	80 (0.124%)	0.0957
E4	1036	1.05	6 (0.719%)	443 (0.686%)	0.831	1.54	20 (1.06%)	443 (0.686%)	0.0666	1.14	12 (0.783%)	443 (0.686%)	0.637	5.36	50 (3.68%)	443 (0.686%)	3.69e-20
E5	24280	0.62	124 (14.9%)	15554 (24.1%)	9.06e-11	0.88	401 (21.2%)	15554 (24.1%)	0.0032	0.51	189 (12.3%)	15554 (24.1%)	3.5e-30	0.57	185 (13.6%)	15554 (24.1%)	2.45e-21
E6	44749	1.79	655 (78.5%)	28272 (43.8%)	4.16e-92	1.46	1209 (63.8%)	28272 (43.8%)	1.17e-66	1.83	1230 (80.3%)	28272 (43.8%)	2.61e-184	0.56	335 (24.7%)	28272 (43.8%)	1.15e-47
E7	18606	0.25	48 (5.76%)	14763 (22.9%)	6.95e-41	0.24	103 (5.44%)	14763 (22.9%)	5.55e-94	0.59	206 (13.4%)	14763 (22.9%)	3.87e-20	0.11	35 (2.58%)	14763 (22.9%)	2.63e-101
E8	17779	0.09	7 (0.839%)	5933 (9.19%)	1.93e-25	0.21	36 (1.9%)	5933 (9.19%)	1.8e-38	0.41	58 (3.79%)	5933 (9.19%)	6.35e-16	0.34	42 (3.09%)	5933 (9.19%)	1.5e-18
E9	66054	1.18	175 (21%)	11473 (17.8%)	0.0178	0.87	294 (15.5%)	11473 (17.8%)	0.0112	1.61	437 (28.5%)	11473 (17.8%)	1.85e-24	1.29	311 (22.9%)	11473 (17.8%)	2.24e-06
E10	41853	0.37	19 (2.28%)	3995 (6.19%)	1.96e-07	0.6	70 (3.69%)	3995 (6.19%)	2.23e-06	0.57	54 (3.52%)	3995 (6.19%)	5.43e-06	1.83	154 (11.3%)	3995 (6.19%)	2.22e-12
E11	45059	1.14	67 (8.03%)	4558 (7.06%)	0.276	1.05	140 (7.39%)	4558 (7.06%)	0.585	0.77	83 (5.42%)	4558 (7.06%)	0.0114	2.19	210 (15.5%)	4558 (7.06%)	1.65e-25
E12	18917	0.75	53 (6.35%)	5474 (8.48%)	0.0281	1.2	193 (10.2%)	5474 (8.48%)	0.0108	0.62	81 (5.29%)	5474 (8.48%)	2.96e-06	1.99	229 (16.9%)	5474 (8.48%)	1.63e-22
E13	77380	0.32	17 (2.04%)	4144 (6.42%)	5.05e-09	0.46	56 (2.96%)	4144 (6.42%)	2.09e-11	0.32	31 (2.02%)	4144 (6.42%)	1.69e-15	2.26	197 (14.5%)	4144 (6.42%)	2.04e-25
E14	25515	0.06	1 (0.12%)	1342 (2.08%)	9.05e-07	0.53	21 (1.11%)	1342 (2.08%)	0.00222	0	0 (0%)	1342 (2.08%)	2.72e-14	1.35	38 (2.8%)	1342 (2.08%)	0.0689
Chromatin states in female liver		dynamic male DHS (834 sites)				static male DHS (1,895 sites)				dynamic sex-indep. DHS (1,532 sites)				static female DHS (1,359 sites)
Name of genomic sites	Number of sites	ES	Number of overlapping DHS (%)	Number of background sites overlapping (%)	P-value	ES	Number of overlapping DHS (%)	Number of background sites overlapping (%)	P-value	ES	Number of overlapping DHS (%)	Number of background sites overlapping (%)	P-value	ES	Number of overlapping DHS (%)	Number of background sites overlapping (%)	P-value
E1	34280	0.85	16 (1.92%)	1463 (2.27%)	0.638	1.44	62 (3.27%)	1463 (2.27%)	0.00623	0.12	4 (0.261%)	1463 (2.27%)	1.06e-10	0.49	15 (1.1%)	1463 (2.27%)	0.00286
E2	53934	6.19	103 (12.4%)	1288 (1.99%)	6.86e-47	8.73	330 (17.4%)	1288 (1.99%)	4e-183	0.46	14 (0.914%)	1288 (1.99%)	0.00145	0.48	13 (0.957%)	1288 (1.99%)	0.00408
E3	23160	0	0 (0%)	63 (0.0975%)	1	2.7	5 (0.264%)	63 (0.0975%)	0.0447	0	0 (0%)	63 (0.0975%)	0.408	0	0 (0%)	63 (0.0975%)	0.643
E4	1014	1.52	10 (1.2%)	509 (0.788%)	0.169	2.61	39 (2.06%)	509 (0.788%)	3.66e-07	1.24	15 (0.979%)	509 (0.788%)	0.38	0.37	4 (0.294%)	509 (0.788%)	0.0404
E5	17937	0.26	43 (5.16%)	12667 (19.6%)	3.4e-33	0.27	102 (5.38%)	12667 (19.6%)	8.32e-70	0.52	155 (10.1%)	12667 (19.6%)	1.89e-23	0.88	235 (17.3%)	12667 (19.6%)	0.0322
E6	39705	1	352 (42.2%)	27153 (42%)	0.944	0.54	431 (22.7%)	27153 (42%)	8.49e-68	1.7	1098 (71.7%)	27153 (42%)	1.33e-118	1.22	697 (51.3%)	27153 (42%)	1.37e-11
E7	18000	0.13	23 (2.76%)	13990 (21.7%)	1.23e-56	0.05	21 (1.11%)	13990 (21.7%)	5.66e-161	0.53	176 (11.5%)	13990 (21.7%)	1.18e-24	0.32	95 (6.99%)	13990 (21.7%)	1.59e-48
E8	18731	0.22	21 (2.52%)	7347 (11.4%)	3.79e-21	0.26	55 (2.9%)	7347 (11.4%)	4.49e-41	0.58	101 (6.59%)	7347 (11.4%)	4.43e-10	0.2	31 (2.28%)	7347 (11.4%)	9.82e-36
E9	62610	2.42	386 (46.3%)	12346 (19.1%)	1.55e-69	1.47	533 (28.1%)	12346 (19.1%)	9.9e-21	2.24	655 (42.8%)	12346 (19.1%)	1.48e-96	0.76	197 (14.5%)	12346 (19.1%)	1.05e-05
E10	28744	2.89	90 (10.8%)	2411 (3.73%)	1.79e-18	2.64	187 (9.87%)	2411 (3.73%)	6.77e-31	1.35	77 (5.03%)	2411 (3.73%)	0.0117	0.51	26 (1.91%)	2411 (3.73%)	0.000194
E11	66618	1.43	175 (21%)	9468 (14.7%)	1.04e-06	1.83	507 (26.8%)	9468 (14.7%)	6.24e-41	0.89	201 (13.1%)	9468 (14.7%)	0.0925	1.45	289 (21.3%)	9468 (14.7%)	9.77e-11
E12	25190	0.85	81 (9.71%)	7339 (11.4%)	0.153	0.84	180 (9.5%)	7339 (11.4%)	0.0111	0.57	100 (6.53%)	7339 (11.4%)	3.23e-10	1.34	207 (15.2%)	7339 (11.4%)	1.95e-05
E13	82249	1.71	77 (9.23%)	3485 (5.4%)	7.3e-06	2.85	291 (15.4%)	3485 (5.4%)	1.41e-54	0.44	36 (2.35%)	3485 (5.4%)	9.3e-09	0.61	45 (3.31%)	3485 (5.4%)	0.000399
E14	24169	1.19	13 (1.56%)	847 (1.31%)	0.538	3.1	77 (4.06%)	847 (1.31%)	1.07e-16	0.15	3 (0.196%)	847 (1.31%)	5.46e-06	0.28	5 (0.368%)	847 (1.31%)	0.000891

## Sheet: 7D_TF Binding sites
Supplementary File 7D - Coordinates for each of the sex-biased transcription factor binding sites defined in sheet 7A. Shown is the chromosome, start, and end coordinates for each of the sites indicated (formatted as a 3-column BED file).
Name of genomic sites	Number of sites			Name of genomic sites	Number of sites			Name of genomic sites	Number of sites			Name of genomic sites	Number of sites			Name of genomic sites	Number of sites			Name of genomic sites	Number of sites			Name of genomic sites	Number of sites			Name of genomic sites	Number of sites
STAT5-High (Male)	1093			STAT5-High (Female)	1174			Bcl6 (Male)	6432			Cux2 (Female)	1471			FoxA1 (Male)	3280			FoxA1 (Female)	577			FoxA2 (Male)	976			FoxA2 (Female)	780
chrom	chromStart	chromEnd		chrom	chromStart	chromEnd		chrom	chromStart	chromEnd		chrom	chromStart	chromEnd		chrom	chromStart	chromEnd		chrom	chromStart	chromEnd		chrom	chromStart	chromEnd		chrom	chromStart	chromEnd
chr1	4791085	4792751		chr1	4758427	4759688		chr1	3467493	3468357		chr1	6986083	6986612		chr1	4651560	4652641		chr1	12634592	12635142		chr1	4651634	4652354		chr1	3467784	3468083
chr1	5123022	5123466		chr1	27941592	27941985		chr1	3504523	3505556		chr1	4791644	4792636		chr1	4774148	4774666		chr1	24106409	24108027		chr1	4661210	4661776		chr1	12634737	12634977
chr1	10145999	10147094		chr1	36373292	36374150		chr1	4651755	4652390		chr1	9553884	9554531		chr1	4867706	4868096		chr1	28911911	28913113		chr1	4867680	4868078		chr1	23386361	23386719
chr1	16597400	16598154		chr1	38137639	38138485		chr1	4660411	4661325		chr1	9978665	9979506		chr1	5062025	5063157		chr1	33776230	33777408		chr1	5061941	5063145		chr1	33996673	33997064
chr1	22125505	22126341		chr1	38259268	38260125		chr1	4758529	4759787		chr1	10310093	10310718		chr1	5264867	5265018		chr1	33870849	33871812		chr1	6500908	6501398		chr1	34004892	34005131
chr1	22917515	22918482		chr1	39345273	39345798		chr1	4781532	4782282		chr1	13650308	13650930		chr1	6501010	6501400		chr1	45007782	45008301		chr1	7094268	7094713		chr1	35983007	35983383
chr1	23244847	23245641		chr1	39486766	39487563		chr1	4791707	4792633		chr1	20121734	20122457		chr1	7094172	7094696		chr1	53408950	53409903		chr1	9648410	9648846		chr1	51349214	51349566
chr1	31102899	31103789		chr1	39869886	39870383		chr1	4798408	4799414		chr1	21017601	21018091		chr1	9686996	9687221		chr1	58052383	58053609		chr1	15823467	15823999		chr1	58885610	58886036
chr1	38505921	38506830		chr1	39882583	39883344		chr1	6985887	6986680		chr1	21316777	21317347		chr1	9937593	9938116		chr1	59969045	59971092		chr1	21316689	21317599		chr1	59418625	59419223
chr1	42798288	42799239		chr1	41613981	41614628		chr1	8044571	8045360		chr1	22125681	22126268		chr1	10310274	10310609		chr1	74170495	74172319		chr1	22601707	22602106		chr1	61204342	61204606
chr1	44633201	44634012		chr1	53120711	53121394		chr1	9574496	9575310		chr1	23170189	23170966		chr1	13313223	13313654		chr1	74359620	74360607		chr1	23491446	23491942		chr1	62764437	62764855
chr1	44853505	44854322		chr1	56836010	56836644		chr1	9762676	9763455		chr1	23244850	23245504		chr1	13553558	13553917		chr1	74414258	74415927		chr1	23712139	23712492		chr1	63752414	63752650
chr1	50863193	50864073		chr1	65429873	65430837		chr1	9937436	9938120		chr1	23491284	23491903		chr1	13618647	13619087		chr1	88254817	88257154		chr1	28859678	28859902		chr1	66867838	66868494
chr1	51937939	51938915		chr1	67048089	67049391		chr1	10310012	10310880		chr1	34160391	34160958		chr1	13636525	13636959		chr1	104524334	104525065		chr1	33098949	33099688		chr1	68767274	68767560
chr1	54599751	54600505		chr1	72343554	72344586		chr1	13363926	13364912		chr1	39189601	39190227		chr1	15823478	15823843		chr1	118642910	118643807		chr1	33153717	33154126		chr1	74947428	74947986
chr1	55148939	55149901		chr1	76637793	76638438		chr1	13797545	13798593		chr1	51952757	51953403		chr1	21122396	21122828		chr1	136632454	136633222		chr1	33270678	33271707		chr1	81994146	81994384
chr1	58127875	58129867		chr1	76939047	76939977		chr1	15806923	15807604		chr1	52535059	52535674		chr1	21218784	21219183		chr1	138261027	138262080		chr1	34179672	34180650		chr1	89480230	89480706
chr1	58134487	58135801		chr1	91546920	91547560		chr1	16189130	16189938		chr1	57429530	57430257		chr1	23328248	23328714		chr1	141350985	141352212		chr1	34472346	34472805		chr1	95106917	95107309
chr1	58157969	58159183		chr1	93000578	93001490		chr1	16646309	16648242		chr1	58201051	58201698		chr1	23491405	23491822		chr1	155746388	155751657		chr1	35837178	35837653		chr1	95125662	95126092
chr1	59268402	59269956		chr1	94614720	94615532		chr1	21122142	21122918		chr1	60716341	60717111		chr1	27940609	27940978		chr1	157019849	157021058		chr1	37366314	37366704		chr1	104524675	104524929
chr1	60881254	60882484		chr1	95328502	95329382		chr1	21156211	21156951		chr1	60883777	60884185		chr1	30977603	30978116		chr1	164669707	164671224		chr1	38506217	38506938		chr1	120317869	120318158
chr1	63182779	63183522		chr1	107213506	107214029		chr1	21221165	21223231		chr1	67148616	67149262		chr1	31072028	31072518		chr1	164846481	164847492		chr1	38921216	38921613		chr1	121113979	121114276
chr1	65453771	65454717		chr1	120580004	120580875		chr1	21257946	21258790		chr1	67149889	67150977		chr1	33153706	33154116		chr1	165924155	165925589		chr1	43330042	43330539		chr1	134987227	134987539
chr1	67318941	67319946		chr1	120637522	120638355		chr1	22305262	22306450		chr1	71884431	71885055		chr1	33270809	33271132		chr1	172066222	172067221		chr1	44072458	44072876		chr1	135044007	135044280
chr1	67404106	67404906		chr1	121087472	121088657		chr1	23170037	23171003		chr1	71920535	71921244		chr1	33271189	33271636		chr1	173257959	173260470		chr1	45488864	45489332		chr1	135607017	135607475
chr1	69940656	69941636		chr1	121117424	121118464		chr1	23262505	23263291		chr1	74115905	74116535		chr1	33741349	33741698		chr1	182825619	182826750		chr1	49627778	49628223		chr1	136283467	136283669
chr1	71702476	71703485		chr1	122166182	122167272		chr1	23327988	23329040		chr1	74386766	74387338		chr1	34309138	34309504		chr1	184270886	184272349		chr1	52097267	52097835		chr1	137020061	137020465
chr1	73082923	73083685		chr1	127619562	127620300		chr1	23491338	23492065		chr1	74805217	74805834		chr1	34443681	34445274		chr1	192726277	192727287		chr1	58128151	58129073		chr1	145443939	145444333
chr1	73982844	73984102		chr1	128411666	128412303		chr1	24012195	24013007		chr1	75118073	75118637		chr1	34456468	34456897		chr1	192751577	192753455		chr1	61667244	61667535		chr1	145478555	145478933
chr1	74769647	74771172		chr1	129140853	129141471		chr1	31005198	31007893		chr1	75535239	75535862		chr1	37033582	37034114		chr1	192944560	192945212		chr1	61696395	61696894		chr1	154643102	154643596
chr1	80334961	80335660		chr1	132728455	132729459		chr1	31090531	31091405		chr1	76907938	76908481		chr1	37625337	37625619		chr1	193005623	193009056		chr1	63185255	63185704		chr1	155577714	155578153
chr1	81885103	81885799		chr1	133631194	133631953		chr1	31210639	31211289		chr1	79462899	79463695		chr1	37687276	37687700		chr1	195458606	195459576		chr1	65384321	65384809		chr1	156121328	156121575
chr1	83896621	83898223		chr1	135110228	135111132		chr1	33155766	33156165		chr1	82155577	82156232		chr1	38365019	38366156		chr10	7458238	7458428		chr1	69900015	69900431		chr1	158931170	158931622
chr1	88381136	88382310		chr1	135192588	135193782		chr1	33811699	33812530		chr1	84396065	84396835		chr1	38506264	38506704		chr10	11211527	11212468		chr1	69940842	69941304		chr1	163044720	163045083
chr1	88919850	88920623		chr1	135967997	135968800		chr1	34491355	34492245		chr1	85266405	85267000		chr1	39124692	39125175		chr10	13121700	13122411		chr1	72272587	72273371		chr1	164822097	164822691
chr1	88921320	88922095		chr1	136249850	136250670		chr1	35982915	35984143		chr1	90068576	90069108		chr1	39243886	39244273		chr10	19310869	19312574		chr1	72745416	72745896		chr1	164826991	164827517
chr1	90855928	90857035		chr1	136257663	136258762		chr1	35990202	35990853		chr1	90153942	90154861		chr1	43591177	43591661		chr10	76815768	76816832		chr1	74476992	74477401		chr1	164846815	164847268
chr1	98780008	98780744		chr1	136461728	136463060		chr1	36122522	36123661		chr1	91392617	91393325		chr1	43992483	43992876		chr10	79726363	79728365		chr1	76046783	76047330		chr1	170466426	170466851
chr1	102194706	102195616		chr1	138597213	138597838		chr1	36300765	36301563		chr1	92131980	92132702		chr1	45954935	45955285		chr10	80390968	80394663		chr1	78099491	78099857		chr1	174147268	174147636
chr1	102278050	102279632		chr1	138600438	138601393		chr1	36311759	36312512		chr1	102278499	102279254		chr1	50739671	50740216		chr10	80988968	80990260		chr1	78139530	78140141		chr1	174757719	174758171
chr1	102394033	102395129		chr1	138829067	138830012		chr1	36522172	36523183		chr1	107075285	107075917		chr1	51961899	51962275		chr10	83416895	83417542		chr1	78690061	78690606		chr1	180778934	180779176
chr1	102451807	102452468		chr1	145341547	145342363		chr1	36583535	36584334		chr1	107560580	107561250		chr1	53115970	53116389		chr10	83996176	83997194		chr1	79846838	79847353		chr1	181486842	181487630
chr1	107798403	107798888		chr1	153062983	153064134		chr1	36931611	36932138		chr1	108069724	108070370		chr1	53750989	53751341		chr10	87819153	87820538		chr1	82243771	82244807		chr1	182464718	182465092
chr1	121489603	121490518		chr1	155577168	155578172		chr1	36996561	36997608		chr1	111265800	111266406		chr1	54599696	54600088		chr10	94406130	94407785		chr1	84396103	84396880		chr1	186301939	186302284
chr1	125965143	125966054		chr1	155879437	155880482		chr1	38505878	38506857		chr1	121538047	121538642		chr1	56351303	56351574		chr10	95410221	95410437		chr1	84415945	84416872		chr1	189033443	189033778
chr1	128942132	128943151		chr1	157887342	157888632		chr1	39124588	39125451		chr1	121994552	121995295		chr1	56596556	56596977		chr10	106110564	106110758		chr1	88916373	88917202		chr1	189623140	189623534
chr1	131147132	131147938		chr1	158435814	158436760		chr1	39249022	39250191		chr1	122012113	122012786		chr1	57326350	57326787		chr10	108155715	108156609		chr1	90463246	90463738		chr1	189656387	189656708
chr1	133374698	133375901		chr1	158685067	158685706		chr1	39345289	39345773		chr1	122491347	122491907		chr1	57398026	57398429		chr10	115023793	115025003		chr1	95459867	95460062		chr1	189842379	189842766
chr1	133837186	133838294		chr1	158772092	158773185		chr1	39502146	39503016		chr1	123230484	123231131		chr1	58128114	58128701		chr10	121199949	121200827		chr1	95589979	95590945		chr1	190118334	190118564
chr1	138427427	138428497		chr1	158944858	158945761		chr1	40220072	40220932		chr1	127440770	127441244		chr1	58134598	58135096		chr10	127895082	127897108		chr1	99454075	99454408		chr1	194273965	194274422
chr1	140522618	140523458		chr1	164158768	164159425		chr1	40244523	40245416		chr1	128197713	128198341		chr1	58667506	58667978		chr10	127961842	127963575		chr1	101057086	101057488		chr10	4823546	4823876
chr1	140808460	140810676		chr1	164804994	164805893		chr1	40274217	40275013		chr1	130313157	130313811		chr1	59014620	59015010		chr11	3188855	3191280		chr1	102579241	102579794		chr10	5521842	5522138
chr1	141447733	141448787		chr1	164821873	164822973		chr1	43959535	43960230		chr1	133470224	133470770		chr1	59158961	59159342		chr11	5067992	5070822		chr1	102606082	102606792		chr10	5701049	5701471
chr1	141754300	141755714		chr1	164912504	164913893		chr1	45977208	45978986		chr1	133693577	133694227		chr1	59209077	59209444		chr11	5606725	5608160		chr1	104414407	104415023		chr10	6781057	6781366
chr1	141760026	141760973		chr1	169176876	169178130		chr1	50739333	50740340		chr1	133841656	133842325		chr1	59268943	59269592		chr11	7097351	7098425		chr1	104631997	104632410		chr10	7815687	7816159
chr1	142302790	142304889		chr1	169186815	169187579		chr1	51816262	51816984		chr1	134223212	134223933		chr1	59378334	59379194		chr11	11743693	11745349		chr1	104945522	104945806		chr10	12189424	12189798
chr1	147819329	147820185		chr1	172897398	172898257		chr1	51952554	51953502		chr1	135336833	135337526		chr1	59861154	59861553		chr11	12274814	12275610		chr1	107001729	107002182		chr10	13435887	13436272
chr1	153567021	153568351		chr1	174833176	174833961		chr1	52175799	52176912		chr1	135545469	135545954		chr1	60620835	60621247		chr11	12363786	12365131		chr1	115090671	115091088		chr10	13555617	13555936
chr1	159104671	159105515		chr1	179268330	179269124		chr1	52289700	52290727		chr1	135560930	135561600		chr1	60652807	60653653		chr11	20278538	20279891		chr1	116765084	116765627		chr10	27982037	27982538
chr1	159117154	159117962		chr1	180911749	180912600		chr1	52906021	52906788		chr1	137092425	137092815		chr1	60716411	60716938		chr11	20694047	20695344		chr1	116772421	116772871		chr10	31106731	31107040
chr1	165080533	165081339		chr1	181038022	181039403		chr1	54599707	54600319		chr1	137105773	137106375		chr1	61696458	61696856		chr11	23532813	23534135		chr1	120299564	120299980		chr10	33507255	33507767
chr1	165747164	165748772		chr1	181099579	181100399		chr1	54671511	54672529		chr1	138566352	138566940		chr1	62099554	62100034		chr11	23948863	23949918		chr1	120708685	120709320		chr10	33509146	33509626
chr1	166617665	166618394		chr1	181574139	181574724		chr1	55108849	55110596		chr1	138738433	138738914		chr1	62434591	62434961		chr11	24999893	25000542		chr1	127429706	127430100		chr10	33585512	33586299
chr1	171196432	171197608		chr1	181953250	181954206		chr1	55143475	55145646		chr1	139068527	139069270		chr1	62777115	62777470		chr11	50138470	50140098		chr1	127448182	127448546		chr10	36798315	36798620
chr1	171900418	171902205		chr1	191684492	191685286		chr1	57782086	57782718		chr1	139102817	139103397		chr1	62945897	62946409		chr11	55053849	55054578		chr1	128569570	128570365		chr10	36967520	36967917
chr1	172072419	172073311		chr1	192004599	192005455		chr1	58127607	58129669		chr1	141447774	141448443		chr1	63238875	63239257		chr11	59319126	59320988		chr1	128942215	128943001		chr10	44015520	44016081
chr1	177537909	177538766		chr1	193063157	193063921		chr1	58137984	58138837		chr1	141754245	141755006		chr1	64180534	64180761		chr11	59692839	59694156		chr1	130055240	130055473		chr10	44482890	44483298
chr1	177553585	177554543		chr1	193318775	193319822		chr1	58157882	58158929		chr1	141760263	141760948		chr1	65384331	65384788		chr11	60109273	60110117		chr1	131147130	131147608		chr10	51997847	51998119
chr1	177581081	177582739		chr1	193659976	193660975		chr1	58768178	58769842		chr1	141911234	141911810		chr1	65401204	65401451		chr11	70418272	70419306		chr1	133818648	133819154		chr10	59000267	59000710
chr1	181507874	181508629		chr1	196572694	196573576		chr1	59014512	59015287		chr1	141915325	141915809		chr1	66147937	66148430		chr11	72168173	72169239		chr1	136477106	136477432		chr10	59091744	59092084
chr1	182945047	182947113		chr10	5169601	5170433		chr1	59230992	59232496		chr1	141977630	141978191		chr1	66597458	66597819		chr11	75840496	75841876		chr1	138745457	138745936		chr10	59258642	59259046
chr1	188609177	188609924		chr10	5613699	5614398		chr1	59254427	59255226		chr1	142163253	142163975		chr1	66824533	66824865		chr11	76659498	76660901		chr1	141445076	141445534		chr10	60929535	60930046
chr1	194638080	194639450		chr10	5722569	5723451		chr1	59257795	59259726		chr1	152977214	152977885		chr1	66867915	66868157		chr11	84952633	84954416		chr1	147841971	147842407		chr10	61166514	61166811
chr10	5470255	5470757		chr10	5754934	5755887		chr1	59268361	59269834		chr1	152979805	152980239		chr1	67139010	67139544		chr11	95119969	95121615		chr1	153143552	153144147		chr10	62295749	62296132
chr10	5685512	5686148		chr10	5756193	5757246		chr1	59448348	59449060		chr1	155536704	155537441		chr1	67162724	67163840		chr11	95942263	95943014		chr1	160861735	160862446		chr10	75822428	75822801
chr10	8361951	8362906		chr10	7806182	7807508		chr1	59480365	59481169		chr1	158436088	158436380		chr1	69900141	69900414		chr11	96837930	96840384		chr1	169249928	169250793		chr10	77564189	77564539
chr10	8702412	8703087		chr10	8504794	8505809		chr1	59543702	59545223		chr1	162304553	162305199		chr1	71680951	71681718		chr11	99247053	99247990		chr1	172537287	172538570		chr10	80393902	80394306
chr10	16931592	16932304		chr10	12180368	12181208		chr1	59560467	59561567		chr1	163174940	163175450		chr1	71770387	71770771		chr11	103619706	103620762		chr1	181971851	181973042		chr10	81017038	81017356
chr10	17019227	17020043		chr10	12532449	12532816		chr1	59741582	59742209		chr1	163176815	163177611		chr1	71854213	71854502		chr11	103814225	103815959		chr1	184492876	184494220		chr10	81728184	81728455
chr10	17241579	17242476		chr10	13587731	13588657		chr1	60203646	60204442		chr1	164796475	164797108		chr1	72059258	72059686		chr11	108227002	108227192		chr1	184688415	184689179		chr10	83098893	83099338
chr10	17271217	17272828		chr10	13686991	13687968		chr1	60725840	60726783		chr1	164827983	164828751		chr1	72745516	72745847		chr11	108872464	108873933		chr1	187435065	187435441		chr10	85417290	85417496
chr10	18806413	18807442		chr10	17440419	17441128		chr1	60883635	60884697		chr1	164916272	164916771		chr1	75008213	75008675		chr11	109300885	109301977		chr1	188141113	188141611		chr10	85881580	85882057
chr10	19539478	19540125		chr10	17794175	17795201		chr1	60903503	60904269		chr1	165861312	165861925		chr1	75056730	75057198		chr11	115884386	115886337		chr1	188478900	188479314		chr10	87250296	87250600
chr10	19744276	19745132		chr10	23612701	23613390		chr1	61199938	61201056		chr1	166150222	166150897		chr1	75334352	75334797		chr11	116167073	116168793		chr1	188609121	188609607		chr10	90114342	90114678
chr10	20327830	20329002		chr10	30320307	30321115		chr1	62945698	62946749		chr1	166182551	166183214		chr1	75535288	75535765		chr11	116273333	116275076		chr1	190689750	190690176		chr10	94871081	94871606
chr10	23430597	23432146		chr10	33507171	33507841		chr1	63170073	63171269		chr1	166456618	166457256		chr1	76046919	76047270		chr11	116441632	116442966		chr10	7230723	7235357		chr10	94877439	94878234
chr10	24080993	24081933		chr10	33572383	33573254		chr1	64167404	64168082		chr1	167351370	167352152		chr1	76193707	76193983		chr11	116606510	116608176		chr10	7236023	7237299		chr10	98410601	98411130
chr10	24081937	24083259		chr10	36865377	36866127		chr1	64784402	64785717		chr1	170235495	170236078		chr1	76370522	76370839		chr11	116703415	116705808		chr10	8702614	8702992		chr10	100691292	100691531
chr10	25315664	25316389		chr10	39192632	39193147		chr1	64841699	64842365		chr1	170296153	170296865		chr1	77169477	77169858		chr11	116779703	116781067		chr10	10566535	10566945		chr10	106365226	106365534
chr10	25774962	25775630		chr10	39333717	39334390		chr1	66947360	66948154		chr1	170309499	170310108		chr1	78139639	78140196		chr11	120209544	120209865		chr10	15872276	15872666		chr10	111207024	111207353
chr10	26732744	26733511		chr10	41790153	41790875		chr1	67047971	67049377		chr1	170405657	170406253		chr1	78583502	78583952		chr12	10968136	10969974		chr10	16931784	16932233		chr10	119994926	119995197
chr10	39152106	39153199		chr10	41801865	41802564		chr1	67123586	67125479		chr1	172537396	172538117		chr1	78646221	78646661		chr12	17354814	17355879		chr10	17271531	17272506		chr10	120560645	120561059
chr10	39153922	39154818		chr10	41812132	41812929		chr1	67149638	67151035		chr1	173098932	173099452		chr1	79412915	79413335		chr12	33581851	33582959		chr10	17995948	17996570		chr10	123227047	123227545
chr10	47262529	47263352		chr10	51763644	51764249		chr1	67240534	67241504		chr1	174581592	174582959		chr1	80424522	80424916		chr12	34114081	34115272		chr10	18086688	18087160		chr11	3344619	3345258
chr10	47371791	47374692		chr10	51999684	52000465		chr1	71680199	71682091		chr1	174920189	174921191		chr1	81900702	81900972		chr12	56300166	56301345		chr10	19184156	19184612		chr11	4102327	4102674
chr10	53989683	53990285		chr10	58987343	58988243		chr1	71702611	71703666		chr1	176672605	176673289		chr1	82176940	82177393		chr12	58297422	58298655		chr10	20196459	20196923		chr11	4996582	4997052
chr10	56806493	56807237		chr10	62891966	62892685		chr1	71932927	71935543		chr1	176861111	176861792		chr1	82185150	82185805		chr12	59320173	59320340		chr10	20561978	20562268		chr11	5115378	5115891
chr10	62618191	62619313		chr10	66492010	66492639		chr1	71958737	71960163		chr1	177537817	177538754		chr1	82819309	82819707		chr12	70397079	70398632		chr10	21632459	21632942		chr11	5211944	5212251
chr10	62620740	62621512		chr10	67790471	67791307		chr1	72078579	72079445		chr1	184493010	184493436		chr1	84044735	84045056		chr12	72410553	72411869		chr10	21896332	21896693		chr11	7103628	7104651
chr10	66569874	66570999		chr10	74513843	74514755		chr1	72219398	72220486		chr1	186661432	186662072		chr1	84237621	84238445		chr12	73300356	73301239		chr10	24059290	24059727		chr11	11718801	11719274
chr10	66689384	66690263		chr10	80628017	80628759		chr1	72226219	72227161		chr1	188232706	188233380		chr1	84250455	84250864		chr12	78338695	78340895		chr10	24191361	24192036		chr11	12316923	12317259
chr10	66771958	66772720		chr10	82300814	82301663		chr1	72272775	72273433		chr1	189586907	189587620		chr1	84396266	84396752		chr12	85327627	85329881		chr10	26732738	26733361		chr11	30130325	30130751
chr10	67596638	67598462		chr10	84220080	84220752		chr1	72290581	72291542		chr1	189877284	189877906		chr1	84406072	84406418		chr12	85748657	85750854		chr10	26833894	26834241		chr11	30548929	30549646
chr10	67673108	67675848		chr10	85881533	85882241		chr1	72334496	72335703		chr1	190676913	190677547		chr1	84415981	84416635		chr12	86224064	86225363		chr10	28764474	28765073		chr11	45712754	45713210
chr10	68095943	68096709		chr10	86797603	86799154		chr1	72818985	72820218		chr1	191867253	191868031		chr1	87936629	87937135		chr12	86825833	86827675		chr10	28778621	28779120		chr11	52996396	52996650
chr10	68200026	68200931		chr10	86831863	86832567		chr1	72836978	72837867		chr1	191971631	191972290		chr1	88635248	88635533		chr12	86939571	86941098		chr10	31364208	31364652		chr11	53922372	53922810
chr10	75297797	75298688		chr10	86834314	86835248		chr1	72838065	72839391		chr1	191998957	191999663		chr1	88916407	88916987		chr12	94815195	94816191		chr10	39771774	39772312		chr11	53935783	53936341
chr10	78080770	78081527		chr10	89143172	89143787		chr1	72855629	72856495		chr1	195031500	195031979		chr1	88928908	88929446		chr12	101436819	101439291		chr10	41294376	41294798		chr11	60088368	60088729
chr10	79563125	79564905		chr10	90129395	90130264		chr1	72870492	72873145		chr10	12362986	12363613		chr1	89256898	89257246		chr12	107022192	107023845		chr10	45568784	45569236		chr11	61124330	61124688
chr10	85379087	85380193		chr10	91608716	91609684		chr1	73979113	73979721		chr10	13558428	13558977		chr1	89936978	89937611		chr12	111683960	111686240		chr10	46909416	46909866		chr11	62730269	62730776
chr10	86492808	86493682		chr10	93560585	93561495		chr1	73982972	73983831		chr10	13770858	13771375		chr1	89938801	89939290		chr12	112996091	112998396		chr10	47371857	47372502		chr11	63801712	63802217
chr10	87166657	87167540		chr10	94255172	94255835		chr1	74059186	74060465		chr10	20192534	20193122		chr1	90068660	90069098		chr12	113315578	113316581		chr10	48769143	48769500		chr11	64224139	64224571
chr10	88927544	88928233		chr10	94861032	94862041		chr1	74089966	74091458		chr10	21015150	21015883		chr1	90076067	90076691		chr12	113382938	113384284		chr10	54913477	54913942		chr11	65632184	65632510
chr10	89095292	89097431		chr10	95158164	95159167		chr1	74242966	74243944		chr10	24648255	24648756		chr1	90318652	90319057		chr13	9833235	9834172		chr10	55032712	55033097		chr11	69117997	69118305
chr10	94803791	94804323		chr10	95302386	95303196		chr1	74425393	74426292		chr10	33509013	33509694		chr1	90456144	90456573		chr13	14073864	14074663		chr10	67460658	67461211		chr11	75054095	75054428
chr10	95428879	95429716		chr10	95305092	95306220		chr1	74432943	74433945		chr10	33533991	33534519		chr1	90656645	90656992		chr13	25141815	25142706		chr10	67995832	67996495		chr11	75090112	75090516
chr10	98114586	98115343		chr10	95643425	95644311		chr1	74438393	74439846		chr10	33536611	33537335		chr1	91000963	91001413		chr13	32893193	32895218		chr10	68200108	68200614		chr11	75384139	75384679
chr10	98128377	98129439		chr10	95695362	95695962		chr1	74442527	74445168		chr10	36991615	36992353		chr1	91185092	91185485		chr13	36059349	36062896		chr10	68201736	68202165		chr11	75509400	75509619
chr10	98720141	98720730		chr10	96080269	96081289		chr1	74634128	74635451		chr10	38891504	38892108		chr1	91806358	91806937		chr13	43492888	43494543		chr10	70630214	70630664		chr11	78373656	78374322
chr10	100952650	100953816		chr10	96115604	96116236		chr1	74767402	74768983		chr10	38936322	38936897		chr1	91815829	91816195		chr13	44964778	44965856		chr10	70851877	70852723		chr11	79017046	79017413
chr10	104606139	104607097		chr10	96205410	96206472		chr1	75143879	75144973		chr10	41993841	41994518		chr1	92301109	92302128		chr13	49435957	49437677		chr10	71001936	71002357		chr11	79883373	79883671
chr10	106782544	106783624		chr10	98634355	98635044		chr1	75312971	75314167		chr10	43030403	43031487		chr1	95274977	95275342		chr13	55735875	55737080		chr10	71772849	71773426		chr11	83446314	83446750
chr10	106790063	106791061		chr10	98651589	98652427		chr1	75534021	75534858		chr10	43032372	43033295		chr1	96835833	96836134		chr13	58080889	58081086		chr10	76138036	76138493		chr11	86720820	86721086
chr10	106795322	106796460		chr10	98920496	98921182		chr1	75656733	75657851		chr10	51956861	51957409		chr1	97213463	97213959		chr13	59657611	59659443		chr10	81683066	81683537		chr11	95042325	95042843
chr10	107635945	107636724		chr10	99066528	99067323		chr1	76739351	76739991		chr10	53142754	53143500		chr1	101057182	101057556		chr13	60782033	60787184		chr10	82417991	82418145		chr11	95084329	95084706
chr10	107881987	107883565		chr10	106373845	106374832		chr1	76915223	76916664		chr10	53778336	53779240		chr1	102278734	102279154		chr13	97960076	97961012		chr10	90129652	90129902		chr11	98840753	98841048
chr10	107891483	107892856		chr10	106378055	106378835		chr1	76939260	76940020		chr10	57207415	57208021		chr1	102281644	102282090		chr13	111392911	111393719		chr10	94803175	94803722		chr11	108130279	108130590
chr10	107946512	107947740		chr10	107377032	107378160		chr1	81741373	81742106		chr10	59236978	59237325		chr1	102446118	102446537		chr13	112514896	112516689		chr10	95429095	95429523		chr11	109201942	109202241
chr10	108726927	108727382		chr10	110314844	110315755		chr1	81946634	81947937		chr10	60600222	60600861		chr1	102551804	102552165		chr13	113783612	113785010		chr10	99516583	99517000		chr11	115728271	115728673
chr10	110960640	110961206		chr10	110630494	110631260		chr1	82155571	82156571		chr10	60601898	60602550		chr1	102579315	102579705		chr13	116532007	116532701		chr10	103135665	103136089		chr12	16877502	16878035
chr10	111034850	111038727		chr10	110971353	110972313		chr1	82163447	82164097		chr10	60869747	60870279		chr1	102603422	102603873		chr13	120216588	120218280		chr10	104161145	104161388		chr12	17491392	17491773
chr10	117321676	117322863		chr10	111024939	111025873		chr1	82176672	82177742		chr10	61102387	61102887		chr1	102606345	102606778		chr14	8606109	8606995		chr10	106782703	106783225		chr12	17733394	17733785
chr10	118189312	118190746		chr10	114687241	114687867		chr1	82184927	82185933		chr10	62584060	62584822		chr1	104414594	104414989		chr14	11881049	11882143		chr10	106790456	106790905		chr12	25814477	25814857
chr10	120786188	120787804		chr10	119601717	119602490		chr1	82783796	82784417		chr10	67331028	67331494		chr1	104631989	104632311		chr14	20110123	20111097		chr10	108955309	108955609		chr12	28042504	28042771
chr10	126790600	126792000		chr10	121542591	121543595		chr1	84250121	84251437		chr10	67597290	67598012		chr1	105658627	105658985		chr14	26505337	26507357		chr10	110238740	110239062		chr12	38215816	38216127
chr10	127508078	127509180		chr10	123283376	123284128		chr1	84274731	84276155		chr10	67599144	67599657		chr1	106835476	106836451		chr14	27398581	27400031		chr10	114472774	114473291		chr12	56160248	56160692
chr11	11845527	11846791		chr10	124722085	124722853		chr1	84281644	84282712		chr10	68003683	68004399		chr1	107781716	107782161		chr14	31813718	31815722		chr10	116632820	116633213		chr12	57890336	57890651
chr11	16644335	16645617		chr10	126128163	126128970		chr1	84396049	84396946		chr10	68334801	68335264		chr1	107850319	107851251		chr14	32845310	32846355		chr10	118066757	118067348		chr12	58061469	58061666
chr11	16678582	16680105		chr10	126650148	126650868		chr1	84415974	84416933		chr10	69047795	69048544		chr1	108051797	108052208		chr14	46432202	46433057		chr10	118632765	118633047		chr12	58382652	58382920
chr11	17635842	17636890		chr10	127007884	127009063		chr1	87690457	87691421		chr10	69350995	69351508		chr1	109921301	109921532		chr14	48267763	48269931		chr10	118931695	118932202		chr12	71734180	71734680
chr11	20900985	20901875		chr10	127581851	127582652		chr1	87855539	87856257		chr10	70830941	70831413		chr1	114844466	114844867		chr14	55309870	55311716		chr10	118934704	118935094		chr12	73528791	73529078
chr11	20915997	20917092		chr10	127656688	127657736		chr1	87941959	87944409		chr10	70851884	70852535		chr1	115090727	115091061		chr14	55494947	55496687		chr10	123656485	123656818		chr12	73879270	73879601
chr11	20979210	20980935		chr10	127784219	127784987		chr1	88375503	88376244		chr10	75246985	75247830		chr1	116765209	116765595		chr14	58016816	58017904		chr10	124706280	124706840		chr12	74161793	74162417
chr11	21021318	21022159		chr11	3297634	3298248		chr1	88893133	88894043		chr10	76037902	76038537		chr1	116772433	116772728		chr14	60997366	60998438		chr10	126841772	126842322		chr12	77619016	77619350
chr11	21264839	21266315		chr11	5087856	5088539		chr1	89189240	89189925		chr10	76549233	76549868		chr1	119316670	119316986		chr14	65881093	65881848		chr11	3000221	3000744		chr12	78153763	78154334
chr11	23349985	23350802		chr11	5326026	5327070		chr1	89222957	89224234		chr10	79551598	79552030		chr1	120299647	120299972		chr14	67690344	67692027		chr11	3000747	3002540		chr12	78278713	78279582
chr11	28584128	28586079		chr11	5852984	5853682		chr1	89469897	89470920		chr10	79563305	79563976		chr1	120510202	120510631		chr14	68332945	68334975		chr11	3155954	3156607		chr12	78391403	78391852
chr11	28602132	28603057		chr11	8403402	8404319		chr1	89471041	89471929		chr10	80423048	80423801		chr1	120708678	120709073		chr14	70421041	70422053		chr11	7020694	7021085		chr12	78800873	78801200
chr11	38571952	38572618		chr11	20232676	20233599		chr1	89667993	89668892		chr10	80445147	80445755		chr1	120774779	120775135		chr14	79851494	79852762		chr11	11964082	11964415		chr12	79043932	79044374
chr11	49026185	49027445		chr11	30111301	30112266		chr1	89889171	89889805		chr10	80553124	80553991		chr1	121415265	121415665		chr14	88878799	88879540		chr11	12381569	12382217		chr12	80342918	80343357
chr11	49832718	49833503		chr11	30672367	30673262		chr1	89920614	89922052		chr10	82785280	82785813		chr1	121996856	121997442		chr14	103380204	103382809		chr11	18066363	18066631		chr12	82204578	82204870
chr11	67370656	67371322		chr11	32609400	32610280		chr1	89968334	89969946		chr10	86240175	86240600		chr1	128569715	128570333		chr14	104735709	104736655		chr11	18231617	18232335		chr12	82227835	82228224
chr11	72880950	72881766		chr11	34658747	34660051		chr1	90061955	90064362		chr10	87166817	87167269		chr1	128942231	128942898		chr14	105657517	105658815		chr11	19841098	19841610		chr12	82536322	82536715
chr11	78512108	78512767		chr11	34808566	34809721		chr1	90068552	90069244		chr10	87181379	87182060		chr1	129028537	129028874		chr15	21586026	21586837		chr11	19970163	19970577		chr12	84801768	84802001
chr11	78659264	78660517		chr11	45739880	45740854		chr1	90082790	90084340		chr10	87947354	87948011		chr1	129251670	129252120		chr15	58214738	58215687		chr11	22725988	22726496		chr12	87039111	87039399
chr11	79373717	79374885		chr11	46377788	46378998		chr1	90148918	90151066		chr10	89028269	89029099		chr1	129652425	129652786		chr15	60680918	60682463		chr11	26583831	26584312		chr12	87207543	87207852
chr11	79381670	79382436		chr11	48251930	48252574		chr1	90302940	90304318		chr10	89062139	89062574		chr1	129970441	129970903		chr15	68758051	68759316		chr11	27167759	27168066		chr12	87897670	87897996
chr11	79577012	79578231		chr11	48805346	48806338		chr1	91792320	91793201		chr10	89099610	89100230		chr1	130483418	130483678		chr15	73252659	73254642		chr11	27760000	27760360		chr12	88157910	88158384
chr11	83632847	83633901		chr11	48894757	48895512		chr1	92130972	92131821		chr10	92535347	92536105		chr1	132558072	132558403		chr15	75186969	75188327		chr11	28902641	28903060		chr12	101583256	101583669
chr11	83710165	83711123		chr11	49809739	49810739		chr1	92136611	92137264		chr10	93560516	93561344		chr1	132737529	132738146		chr15	75838370	75841092		chr11	31001115	31001410		chr12	103893127	103893545
chr11	84325534	84326043		chr11	50713234	50714619		chr1	92301097	92302262		chr10	93581699	93582460		chr1	133818640	133819077		chr15	83340559	83342093		chr11	44991294	44991955		chr12	109958904	109959133
chr11	86427111	86427971		chr11	51566889	51567729		chr1	93197774	93198755		chr10	93645282	93645835		chr1	135151830	135152397		chr15	84817321	84819614		chr11	52231463	52232198		chr12	113889022	113889452
chr11	90182650	90183274		chr11	51639439	51640295		chr1	93208802	93209239		chr10	94608910	94609457		chr1	135327812	135328140		chr15	85007886	85008762		chr11	54153363	54153862		chr12	113906825	113907368
chr11	93168799	93169531		chr11	54492346	54493256		chr1	93316505	93318037		chr10	94888603	94889396		chr1	135404792	135405159		chr15	93166238	93168357		chr11	55878103	55879050		chr13	4383433	4383713
chr11	95937903	95938658		chr11	55268520	55269595		chr1	93336055	93336949		chr10	95650696	95651344		chr1	135514936	135515293		chr15	97751083	97752268		chr11	62639708	62640232		chr13	5869066	5869441
chr11	98633458	98637493		chr11	57997008	57997884		chr1	93342222	93343787		chr10	96193948	96194429		chr1	138402791	138403220		chr15	97938656	97939775		chr11	70952010	70952501		chr13	9833521	9833793
chr11	101143397	101144173		chr11	59496144	59496785		chr1	93350201	93350860		chr10	98669766	98670647		chr1	138529507	138529892		chr15	100948273	100949467		chr11	72464479	72464785		chr13	20208757	20209186
chr11	101630879	101632073		chr11	59622225	59623085		chr1	93351898	93353543		chr10	98674066	98674676		chr1	138561739	138562209		chr15	102300237	102301836		chr11	79373976	79374689		chr13	25041784	25042171
chr11	105039257	105040365		chr11	59864360	59864942		chr1	93779535	93780293		chr10	106350452	106350851		chr1	138738481	138739392		chr15	102339892	102341891		chr11	79948155	79948340		chr13	28388940	28389295
chr11	106350817	106352067		chr11	59945224	59946315		chr1	93996815	93997824		chr10	106369377	106369981		chr1	138808183	138808642		chr16	17221926	17222974		chr11	84495934	84496920		chr13	28906042	28906401
chr11	106749242	106750032		chr11	60717012	60717865		chr1	95019712	95021336		chr10	106551980	106552680		chr1	139040664	139041030		chr16	17619189	17620551		chr11	87743896	87744428		chr13	32389443	32389737
chr11	107313581	107314479		chr11	63658726	63659603		chr1	95024547	95025799		chr10	106753081	106753701		chr1	139122063	139122446		chr16	22163062	22164065		chr11	92791268	92791574		chr13	32511381	32511681
chr11	109962471	109963619		chr11	63794184	63794682		chr1	95589896	95591075		chr10	110144421	110144907		chr1	141397821	141398185		chr16	22960518	22961823		chr11	95570795	95571315		chr13	34279415	34279735
chr11	111097833	111098448		chr11	67339826	67341176		chr1	95721192	95722625		chr10	111045485	111046109		chr1	141445120	141445559		chr16	26371211	26372293		chr11	95584338	95584715		chr13	36740271	36740570
chr11	111100886	111102634		chr11	68664076	68664925		chr1	96943799	96944394		chr10	112391127	112391647		chr1	141447830	141448314		chr16	30134959	30135198		chr11	95676704	95677102		chr13	36814177	36814561
chr11	111113039	111113885		chr11	70119323	70120312		chr1	102011134	102011842		chr10	114774400	114774964		chr1	141557366	141557832		chr16	37384255	37385520		chr11	97723421	97723863		chr13	37831987	37832455
chr11	111117026	111118014		chr11	70258052	70258748		chr1	102115660	102116420		chr10	115515578	115516219		chr1	141756772	141757136		chr16	43958845	43959036		chr11	102404956	102405552		chr13	38436673	38437110
chr11	111130941	111131559		chr11	72289505	72290622		chr1	102278122	102279293		chr10	116795852	116796479		chr1	141977613	141978073		chr16	46416367	46416611		chr11	102452496	102453259		chr13	39909861	39910213
chr11	112581619	112582914		chr11	74142100	74142782		chr1	107075235	107076426		chr10	117143581	117144138		chr1	145405455	145405916		chr16	56075239	56076301		chr11	104395984	104396161		chr13	44702765	44703045
chr11	113492707	113493686		chr11	75381887	75383039		chr1	107804621	107805711		chr10	118136919	118137600		chr1	145528244	145528572		chr16	57390907	57391989		chr11	104837570	104838030		chr13	45981737	45981953
chr11	115956716	115957264		chr11	76787794	76789101		chr1	107821071	107822977		chr10	120802337	120803549		chr1	147819504	147819831		chr16	63833397	63834625		chr11	106529113	106529779		chr13	46408486	46408814
chr11	120123337	120124227		chr11	80605311	80606175		chr1	107823252	107824184		chr10	121059467	121060125		chr1	147842005	147842424		chr16	65910025	65911240		chr11	107727672	107728106		chr13	47274480	47274698
chr12	12491432	12492262		chr11	83555006	83556243		chr1	107850276	107851196		chr10	121892689	121893429		chr1	149213387	149213763		chr16	91338230	91339808		chr11	108389314	108389803		chr13	51926151	51926448
chr12	25919182	25920955		chr11	85659387	85660325		chr1	108670546	108671171		chr10	121906318	121906905		chr1	152251459	152252068		chr16	91464466	91465930		chr11	109131341	109131904		chr13	56302875	56303306
chr12	26556002	26557165		chr11	86657026	86658228		chr1	120207524	120208294		chr10	121937019	121937595		chr1	153059948	153060374		chr16	94533939	94535751		chr11	111101008	111101518		chr13	56689716	56690250
chr12	28579133	28580219		chr11	87239871	87240782		chr1	120299387	120300206		chr10	121952746	121953368		chr1	153065437	153066071		chr16	96380510	96381594		chr11	111117295	111117744		chr13	56712422	56712895
chr12	28722587	28723734		chr11	90546177	90546977		chr1	120355165	120356057		chr10	124706206	124706884		chr1	153143684	153144162		chr17	4625647	4627075		chr11	121351954	121352374		chr13	58975205	58975619
chr12	33324024	33325047		chr11	94136207	94136923		chr1	120491427	120492645		chr10	126508086	126508735		chr1	153556096	153556579		chr17	6583264	6584554		chr12	3109747	3110189		chr13	59607677	59608162
chr12	36272430	36273273		chr11	95353171	95353705		chr1	120509886	120511090		chr10	126792266	126793196		chr1	154291727	154292195		chr17	10511741	10513557		chr12	3702859	3703275		chr13	63501386	63501765
chr12	37957458	37958097		chr11	97521239	97522288		chr1	120619919	120620672		chr10	126841629	126842374		chr1	158388805	158389217		chr17	23836156	23837799		chr12	4913142	4913606		chr13	64055564	64055931
chr12	45007915	45008764		chr11	98842730	98843547		chr1	120637660	120638353		chr10	127406840	127407482		chr1	158908801	158909219		chr17	24591150	24592560		chr12	8212497	8213023		chr13	67273553	67274027
chr12	46166341	46167221		chr11	100406285	100407126		chr1	120774582	120775302		chr10	127630935	127631513		chr1	160861831	160862405		chr17	27269957	27271256		chr12	8541579	8542104		chr13	69677072	69677549
chr12	53118291	53118832		chr11	100414099	100414810		chr1	121043049	121043786		chr10	127648746	127649178		chr1	160898552	160899292		chr17	28522855	28523971		chr12	8570157	8570663		chr13	74247473	74247852
chr12	56593401	56594223		chr11	100588397	100589212		chr1	121069766	121070582		chr11	5819489	5819880		chr1	161054832	161055244		chr17	29230383	29233147		chr12	13629018	13629323		chr13	94309124	94309780
chr12	58545007	58546124		chr11	101346933	101348031		chr1	121087524	121088506		chr11	5943757	5944462		chr1	162715718	162716187		chr17	29797158	29798342		chr12	25299337	25299794		chr13	96601396	96601719
chr12	58637234	58641211		chr11	102003428	102005302		chr1	121117433	121118461		chr11	7020592	7021100		chr1	163174928	163175444		chr17	32065323	32069732		chr12	27072353	27072703		chr13	97414120	97414448
chr12	58637234	58641871		chr11	102253195	102254894		chr1	121120253	121120995		chr11	11837437	11838243		chr1	163260769	163261135		chr17	34026428	34028435		chr12	31026582	31027452		chr13	102046698	102047150
chr12	58638702	58641871		chr11	102635865	102636680		chr1	121145067	121146142		chr11	11861972	11862585		chr1	164917621	164918181		chr17	35530440	35531846		chr12	31864467	31864719		chr13	108583678	108583988
chr12	70519886	70521053		chr11	105237064	105237801		chr1	121190114	121191049		chr11	16601553	16602417		chr1	167130480	167130896		chr17	36367653	36369040		chr12	32095571	32096072		chr13	110230487	110230897
chr12	70814305	70815237		chr11	106970812	106971813		chr1	121191188	121192484		chr11	16651948	16652440		chr1	167539019	167539628		chr17	36407529	36409194		chr12	35861425	35861668		chr13	110424023	110424319
chr12	70858206	70860842		chr11	107178789	107179725		chr1	121454066	121455163		chr11	18920276	18921094		chr1	168223053	168223605		chr17	39979463	39986251		chr12	38029273	38029811		chr13	110512599	110513381
chr12	71113697	71114460		chr11	107312218	107313160		chr1	121485874	121487104		chr11	20726201	20726745		chr1	169250000	169250797		chr17	43153185	43154219		chr12	40658029	40658511		chr13	112908814	112909189
chr12	72499526	72500634		chr11	107434349	107435794		chr1	121809131	121810260		chr11	21021382	21022090		chr1	170427892	170428346		chr17	46435041	46436277		chr12	40719454	40719878		chr13	113368276	113368604
chr12	79521850	79522607		chr11	107623079	107623922		chr1	121929397	121930314		chr11	24455918	24456482		chr1	171096183	171097167		chr17	47531985	47533118		chr12	40823565	40823981		chr13	118458139	118458559
chr12	80504692	80505938		chr11	109208706	109209437		chr1	121933674	121934494		chr11	28602301	28602865		chr1	171197139	171197480		chr17	56339002	56340395		chr12	41599820	41600235		chr14	8765837	8766435
chr12	81925172	81926022		chr11	109417212	109418274		chr1	121962552	121963583		chr11	29509851	29510372		chr1	171961763	171962220		chr17	63086379	63087196		chr12	44375122	44375600		chr14	8795552	8796167
chr12	82073296	82074531		chr11	112154565	112155478		chr1	121994553	121995417		chr11	30669210	30669682		chr1	171965206	171965669		chr17	64212240	64214232		chr12	45008218	45008572		chr14	12918594	12919079
chr12	83043917	83045287		chr11	115282620	115283414		chr1	121996837	121997661		chr11	31724527	31725292		chr1	172358201	172358735		chr17	68090193	68091213		chr12	48320386	48320654		chr14	17348278	17348899
chr12	84016370	84017401		chr11	115323046	115324311		chr1	122011839	122013317		chr11	31735372	31735842		chr1	172520688	172521090		chr17	72223098	72224007		chr12	48470269	48470664		chr14	19371675	19371942
chr12	87166406	87167122		chr11	115333150	115334125		chr1	122016404	122018724		chr11	35656258	35656841		chr1	172537252	172538014		chr17	73266917	73268563		chr12	48507082	48507528		chr14	23407068	23407476
chr12	87854451	87856397		chr11	117869327	117869831		chr1	122551250	122552121		chr11	35776720	35777537		chr1	172538572	172539017		chr17	79753696	79754943		chr12	48514336	48514618		chr14	29239796	29240031
chr12	88240275	88241237		chr11	118589081	118589985		chr1	123223784	123225421		chr11	46393788	46394395		chr1	172684894	172685246		chr17	84260562	84262472		chr12	51167470	51167743		chr14	32526053	32526376
chr12	96100742	96101630		chr11	119655172	119655786		chr1	123232127	123232994		chr11	46548066	46548895		chr1	173274800	173275270		chr18	5138566	5140212		chr12	55479567	55480023		chr14	33885494	33885960
chr12	100071584	100072685		chr11	121054358	121055098		chr1	125965200	125966003		chr11	49526046	49526545		chr1	174636444	174636842		chr18	7608638	7609727		chr12	61157067	61157508		chr14	37917916	37918385
chr12	104871178	104872562		chr12	3647660	3648494		chr1	127293170	127293879		chr11	50456113	50456918		chr1	174757786	174758065		chr18	10934244	10935239		chr12	68160099	68160940		chr14	46164620	46164974
chr12	107715842	107717929		chr12	4385911	4386929		chr1	127456369	127457380		chr11	51922888	51923320		chr1	176498663	176499125		chr18	12145428	12146703		chr12	72906450	72906884		chr14	46359408	46359776
chr12	112827109	112827722		chr12	11272306	11273136		chr1	127590799	127591574		chr11	52166451	52166931		chr1	176672709	176673269		chr18	21053887	21055819		chr12	76784560	76784999		chr14	47233423	47233740
chr12	118963359	118963957		chr12	13683672	13684485		chr1	128941955	128943059		chr11	52177019	52177706		chr1	176695665	176696293		chr18	31768849	31770261		chr12	77446847	77447042		chr14	50282173	50282538
chr13	4269426	4270193		chr12	16636686	16638524		chr1	129251322	129252782		chr11	52231296	52232150		chr1	176837646	176838345		chr18	34532043	34533330		chr12	80626882	80627255		chr14	54868657	54869025
chr13	4576924	4577747		chr12	21141707	21142901		chr1	130722787	130723639		chr11	53122237	53122712		chr1	176861150	176861784		chr18	35046500	35049272		chr12	83984120	83984596		chr14	61725181	61725669
chr13	7512578	7513255		chr12	21326828	21327734		chr1	131147207	131147899		chr11	53604324	53604841		chr1	176890011	176890544		chr18	40951825	40952801		chr12	84373511	84374186		chr14	63511733	63512230
chr13	8697484	8698593		chr12	25362052	25362709		chr1	133034655	133036153		chr11	53611002	53611504		chr1	177537580	177538744		chr18	42670470	42671691		chr12	91056504	91056968		chr14	63720408	63720733
chr13	9480722	9481525		chr12	25422919	25423545		chr1	133374905	133375964		chr11	53716068	53716784		chr1	179118902	179119178		chr18	46756350	46758185		chr12	100538952	100539357		chr14	64552830	64553147
chr13	10779532	10780580		chr12	27045838	27046622		chr1	133382506	133383348		chr11	57851429	57851906		chr1	179641134	179641557		chr18	48169715	48170459		chr12	101717242	101717847		chr14	64773148	64773565
chr13	14284362	14285086		chr12	31042179	31043094		chr1	133408289	133409218		chr11	57909016	57909471		chr1	179642862	179643307		chr18	53373191	53374659		chr12	103534966	103535668		chr14	75158686	75159146
chr13	16361101	16362337		chr12	31044988	31046400		chr1	133422836	133425688		chr11	59244966	59245536		chr1	180165668	180166509		chr18	60808003	60809443		chr12	104781561	104782036		chr14	103352778	103353136
chr13	16542515	16543227		chr12	33033200	33033917		chr1	133638433	133639329		chr11	59453435	59454091		chr1	180866664	180867050		chr18	61866564	61867909		chr12	109579979	109580397		chr14	104736132	104736386
chr13	16666975	16667612		chr12	36366330	36367144		chr1	133708891	133710076		chr11	60622308	60623578		chr1	181971897	181972908		chr18	62338818	62340319		chr12	111133509	111133976		chr14	119093468	119094145
chr13	16727898	16728622		chr12	40946323	40947596		chr1	133741329	133742223		chr11	60637200	60637712		chr1	183405905	183406622		chr18	67555852	67557121		chr12	111301106	111301612		chr14	123048685	123049143
chr13	24416266	24418167		chr12	41308408	41308985		chr1	133763419	133764470		chr11	60692762	60693649		chr1	184732570	184733376		chr18	68851227	68852293		chr12	112994535	112994999		chr15	3508530	3508836
chr13	24456647	24457836		chr12	46052955	46053628		chr1	133815439	133816267		chr11	61085099	61085620		chr1	185903898	185904213		chr18	70631303	70632479		chr12	116491347	116491914		chr15	4302667	4302935
chr13	24984027	24984900		chr12	55455153	55455845		chr1	133818566	133819175		chr11	61364395	61364978		chr1	186429544	186429979		chr18	73732676	73733751		chr12	116634983	116635438		chr15	6679206	6679398
chr13	28161006	28162143		chr12	58060047	58060696		chr1	133837265	133838296		chr11	69179483	69180148		chr1	186553298	186553742		chr18	74047057	74048091		chr12	119800596	119801115		chr15	9177535	9177921
chr13	28199700	28200988		chr12	58756606	58757676		chr1	133865049	133866699		chr11	69529283	69530044		chr1	187858361	187858750		chr18	76073442	76073679		chr13	3251679	3252176		chr15	9912015	9912306
chr13	31314426	31315608		chr12	60141095	60141842		chr1	133866828	133867688		chr11	70650378	70650997		chr1	188197814	188198304		chr18	78394635	78395632		chr13	5586450	5586833		chr15	12162040	12162632
chr13	33061099	33062144		chr12	73186589	73187330		chr1	133868820	133870072		chr11	77643930	77644823		chr1	188232810	188233216		chr18	84999912	85002510		chr13	6329759	6330306		chr15	25618200	25618761
chr13	35107455	35108917		chr12	78157618	78158472		chr1	133886502	133887547		chr11	77991492	77992101		chr1	188609118	188609553		chr19	5601314	5602798		chr13	7303221	7303562		chr15	27525248	27525615
chr13	35243303	35244232		chr12	78598866	78599887		chr1	134066534	134067249		chr11	78107934	78108682		chr1	189308652	189309068		chr19	8325990	8327732		chr13	7312690	7313155		chr15	30201066	30201333
chr13	39535664	39536943		chr12	79030307	79031158		chr1	134194814	134196884		chr11	78312025	78312817		chr1	189329190	189329704		chr19	14895491	14895658		chr13	7428489	7429005		chr15	30215393	30215923
chr13	40410519	40411633		chr12	80456808	80457903		chr1	134209159	134209963		chr11	79577127	79577807		chr1	190689800	190690166		chr19	17468004	17469291		chr13	8697651	8698245		chr15	31156877	31157429
chr13	41908106	41909591		chr12	83420536	83421296		chr1	134213520	134215368		chr11	84641909	84642565		chr1	190726472	190726940		chr19	18705470	18707008		chr13	8861638	8862111		chr15	34020543	34020973
chr13	44540933	44541679		chr12	86310195	86311050		chr1	134215635	134216528		chr11	85201854	85202444		chr1	190729964	190730449		chr19	18807202	18807388		chr13	9035353	9035681		chr15	38350521	38350988
chr13	44735355	44736242		chr12	86681904	86682814		chr1	134483086	134484072		chr11	85452068	85452652		chr1	191946131	191946582		chr19	32018708	32019008		chr13	10441184	10441795		chr15	38363191	38363754
chr13	46146236	46148198		chr12	87154547	87155341		chr1	134999661	135000700		chr11	85588949	85589614		chr1	191971557	191972124		chr19	41985774	41987515		chr13	18180573	18180948		chr15	38460907	38461314
chr13	46248413	46249318		chr12	87875013	87875974		chr1	135118916	135119809		chr11	87236536	87237022		chr1	192656972	192657422		chr19	42100705	42101006		chr13	20752477	20753524		chr15	39705203	39705659
chr13	51309870	51310598		chr12	87879240	87880341		chr1	135160759	135162734		chr11	87506390	87507114		chr1	193215190	193215582		chr19	42244111	42245928		chr13	20939790	20940099		chr15	39776158	39776459
chr13	54765412	54766426		chr12	88259194	88261243		chr1	135174887	135175835		chr11	88297421	88298082		chr1	193707586	193708228		chr19	44369051	44370912		chr13	24456939	24457602		chr15	41677684	41677971
chr13	58857332	58858171		chr12	88737817	88738558		chr1	135272135	135273474		chr11	88471781	88472601		chr1	193770533	193771010		chr19	55602668	55604099		chr13	24484409	24484894		chr15	44195517	44195878
chr13	63002591	63003514		chr12	92947470	92948291		chr1	135578124	135578822		chr11	97723376	97723926		chr1	194436110	194436624		chr19	55654214	55654366		chr13	24649660	24650542		chr15	44548502	44549248
chr13	63766747	63767694		chr12	100446215	100447165		chr1	135592196	135593086		chr11	98451754	98452604		chr1	196413761	196414059		chr19	61301835	61303978		chr13	27008398	27008802		chr15	51993209	51993576
chr13	74643243	74643657		chr12	100517594	100518241		chr1	135609174	135609915		chr11	98812534	98813237		chr1	197047750	197048738		chr2	20820921	20822390		chr13	27083354	27083873		chr15	54794607	54795127
chr13	75504113	75505032		chr12	100609639	100610357		chr1	135805144	135805711		chr11	100392189	100392906		chr10	3147937	3148334		chr2	24489559	24490541		chr13	28161320	28162052		chr15	55071942	55072267
chr13	75530385	75530981		chr12	103127360	103128156		chr1	135829630	135831616		chr11	100608206	100608914		chr10	7584627	7585081		chr2	28039372	28040696		chr13	28200241	28200859		chr15	60680094	60680463
chr13	95168130	95169637		chr12	109578118	109579172		chr1	136240953	136242095		chr11	102867662	102868407		chr10	8702628	8703001		chr2	33741866	33743427		chr13	29141606	29141936		chr15	60681297	60681682
chr13	101618922	101620555		chr12	109579756	109580608		chr1	138311324	138312342		chr11	103595760	103596430		chr10	8703141	8703521		chr2	35399940	35400873		chr13	33061337	33061999		chr15	60724089	60724894
chr13	102487669	102490030		chr12	113905645	113906437		chr1	138437878	138439104		chr11	104254150	104254777		chr10	10300576	10300990		chr2	60240437	60241339		chr13	35689814	35690271		chr15	60877318	60877810
chr13	108431565	108432943		chr12	113908882	113909851		chr1	138565945	138567058		chr11	104301639	104302601		chr10	10566540	10566898		chr2	66027098	66027880		chr13	36418497	36418938		chr15	60929932	60930409
chr13	108456497	108457608		chr12	115225465	115226193		chr1	138594891	138595832		chr11	106504177	106504841		chr10	12192177	12192609		chr2	73705628	73706578		chr13	36715012	36715898		chr15	62769349	62769653
chr13	109508823	109509746		chr12	117469711	117470637		chr1	138831010	138831698		chr11	106638550	106639144		chr10	12307915	12308345		chr2	84264937	84265903		chr13	39381986	39382521		chr15	64080768	64081161
chr13	112695272	112696108		chr12	119350991	119351533		chr1	138862338	138864221		chr11	106873936	106874524		chr10	12529519	12529974		chr2	84517740	84519132		chr13	42995007	42995443		chr15	71802795	71803194
chr13	113072408	113073649		chr13	3864830	3865582		chr1	138867488	138868098		chr11	109131390	109131899		chr10	13750355	13750665		chr2	84796176	84797130		chr13	43608763	43609074		chr15	75255730	75256166
chr13	113181224	113182004		chr13	9098357	9099168		chr1	139068183	139069279		chr11	109240603	109241201		chr10	17127911	17128321		chr2	90234916	90235891		chr13	43992136	43992937		chr15	75986299	75986781
chr13	114208190	114209687		chr13	17875456	17876684		chr1	139176850	139177789		chr11	109898993	109899842		chr10	17271849	17272480		chr2	91377535	91378563		chr13	48289202	48289712		chr15	76551753	76552015
chr13	114876234	114877618		chr13	20208428	20209287		chr1	140824973	140826015		chr11	110228966	110229545		chr10	17371190	17371598		chr2	91933336	91934435		chr13	49677526	49678105		chr15	76939578	76939957
chr13	115069832	115070566		chr13	20222069	20223175		chr1	140841568	140842504		chr11	112581615	112582684		chr10	17996028	17996579		chr2	92124591	92125534		chr13	51323871	51324357		chr15	82137614	82137913
chr14	9099785	9100904		chr13	20239147	20240131		chr1	140859261	140860571		chr11	112589369	112590077		chr10	19765571	19766313		chr2	101569165	101570375		chr13	52861521	52862196		chr15	82216123	82216551
chr14	11117249	11118011		chr13	20265576	20266856		chr1	142276957	142278392		chr11	113583439	113584161		chr10	21096742	21097352		chr2	102290391	102291376		chr13	52867409	52867932		chr15	83969864	83970200
chr14	11582488	11583944		chr13	21841759	21842879		chr1	142303139	142304343		chr11	113589312	113589895		chr10	21179772	21180193		chr2	109857590	109858534		chr13	58857431	58857906		chr15	85008137	85008258
chr14	11964315	11966211		chr13	22066619	22067390		chr1	142312029	142312816		chr11	115309767	115310268		chr10	22084661	22085122		chr2	118060470	118061224		chr13	58862452	58862931		chr15	86025121	86025627
chr14	12402054	12402619		chr13	23529454	23530402		chr1	145405241	145406018		chr11	115960438	115961603		chr10	22494500	22494818		chr2	118570753	118572415		chr13	59021978	59022344		chr15	86253194	86253536
chr14	12698116	12699022		chr13	23537094	23538977		chr1	145509973	145510849		chr11	116482243	116482940		chr10	23209629	23210015		chr2	118860064	118861410		chr13	63791883	63792419		chr15	90907832	90908101
chr14	18561160	18562349		chr13	23598092	23598753		chr1	145623647	145624594		chr11	117479411	117480196		chr10	24031963	24032538		chr2	121114367	121115970		chr13	64224802	64225615		chr15	100180010	100180410
chr14	27344965	27345921		chr13	23958762	23959794		chr1	152305911	152306738		chr11	118584594	118585261		chr10	24059386	24059711		chr2	121347618	121348800		chr13	68104523	68105142		chr15	100900050	100900414
chr14	28606146	28606830		chr13	24778430	24779775		chr1	152975022	152975757		chr11	121065578	121066055		chr10	24191374	24191721		chr2	122173692	122174991		chr13	68431536	68432227		chr15	101104762	101105234
chr14	29262259	29263044		chr13	30031430	30032732		chr1	152976833	152977982		chr11	121371889	121372666		chr10	25255729	25256279		chr2	128891157	128892490		chr13	68765867	68766366		chr15	101769359	101769802
chr14	30827783	30828533		chr13	30325089	30325948		chr1	152998045	152999120		chr11	121533888	121534486		chr10	25315796	25316180		chr2	137859172	137859412		chr13	69393591	69393837		chr15	101956707	101957210
chr14	31489059	31490191		chr13	30430391	30431161		chr1	153117610	153118457		chr12	8025379	8025925		chr10	26440020	26440439		chr2	150612113	150613205		chr13	71349683	71349957		chr15	103067838	103068327
chr14	31914634	31915566		chr13	31431720	31432513		chr1	153190717	153192039		chr12	8570072	8570650		chr10	26569713	26570155		chr2	152532582	152533965		chr13	74707851	74708288		chr16	10328015	10328559
chr14	35127792	35128794		chr13	31868324	31868857		chr1	153546216	153547029		chr12	8817958	8818852		chr10	27353983	27354276		chr2	153171129	153172761		chr13	74988296	74988615		chr16	10789571	10789905
chr14	55710460	55711569		chr13	34396580	34397649		chr1	154749958	154750626		chr12	8883457	8884109		chr10	27991919	27992251		chr2	153604363	153605612		chr13	75051600	75052018		chr16	10881078	10881534
chr14	58785345	58786259		chr13	36576046	36576763		chr1	155001404	155002170		chr12	9037992	9038465		chr10	28764446	28764889		chr2	155068255	155069816		chr13	75362992	75363794		chr16	12208148	12208598
chr14	59328000	59329414		chr13	36820027	36820634		chr1	155233703	155234513		chr12	10574545	10575236		chr10	28778631	28778979		chr2	155298837	155300278		chr13	77578117	77578406		chr16	18533199	18533461
chr14	65277800	65279033		chr13	43328568	43329410		chr1	155525804	155527101		chr12	12816886	12817563		chr10	29852098	29852547		chr2	157954472	157957687		chr13	85937150	85937393		chr16	27343162	27343593
chr14	65473841	65474781		chr13	46637554	46638606		chr1	155596266	155597162		chr12	17748509	17749110		chr10	31271537	31272069		chr2	162756411	162758143		chr13	92094824	92095115		chr16	30089108	30089490
chr14	66337986	66339800		chr13	46798000	46798755		chr1	155832590	155833333		chr12	21432210	21432873		chr10	31305315	31305651		chr2	167317105	167319447		chr13	92874157	92874570		chr16	30368974	30369383
chr14	71650752	71651320		chr13	47249904	47250854		chr1	155839439	155840259		chr12	25345800	25346384		chr10	31364336	31364630		chr2	172924171	172925665		chr13	95022872	95023420		chr16	30489716	30490133
chr14	73268065	73269275		chr13	48978911	48979800		chr1	155997197	155998249		chr12	26465971	26466594		chr10	33714170	33714492		chr2	174288662	174290249		chr13	95168381	95169468		chr16	32133221	32133673
chr14	76197318	76198341		chr13	50911039	50911489		chr1	156882748	156883353		chr12	26498475	26499470		chr10	33856241	33856713		chr2	175868310	175869024		chr13	100436700	100437322		chr16	32520392	32520834
chr14	77211194	77212584		chr13	52000074	52000990		chr1	156910929	156911675		chr12	28631646	28632272		chr10	34692448	34692796		chr3	6115631	6116597		chr13	102646959	102647580		chr16	32523842	32524366
chr14	77985690	77986483		chr13	52007749	52008670		chr1	156955341	156956059		chr12	29371005	29371746		chr10	38882939	38883273		chr3	9947328	9948362		chr13	102701309	102701585		chr16	32555653	32556107
chr14	87161977	87162987		chr13	52318423	52319373		chr1	157121816	157122650		chr12	33987787	33988182		chr10	39099669	39100262		chr3	10020976	10022088		chr13	102767184	102767997		chr16	70424102	70424444
chr14	87162997	87163937		chr13	52987141	52988014		chr1	157416325	157416950		chr12	40749106	40749837		chr10	39771817	39772303		chr3	14885738	14887289		chr13	110132606	110133053		chr16	77111539	77111929
chr14	87164817	87165418		chr13	55284589	55285283		chr1	157641743	157643433		chr12	42142894	42143568		chr10	39783256	39783555		chr3	19934524	19935715		chr13	111502648	111503106		chr16	78371797	78372057
chr14	92303101	92303941		chr13	58554862	58555592		chr1	157656644	157657580		chr12	45008093	45008682		chr10	40091372	40091847		chr3	37210782	37211921		chr13	112116110	112116863		chr16	91534834	91535085
chr14	103181345	103182071		chr13	59061214	59062537		chr1	157659384	157660866		chr12	52944879	52946235		chr10	40092984	40093341		chr3	51027822	51030735		chr13	113813498	113814002		chr16	92632386	92632875
chr14	103862515	103863751		chr13	59063711	59064681		chr1	158388702	158389440		chr12	55306532	55307253		chr10	40236279	40236662		chr3	51212267	51213494		chr13	115444267	115444701		chr16	93863575	93863875
chr14	116841056	116841729		chr13	60634973	60635578		chr1	158435674	158436699		chr12	55482867	55483697		chr10	40317858	40318120		chr3	51569708	51571168		chr13	115643277	115643875		chr16	96036224	96036566
chr14	117106077	117106747		chr13	63235787	63236812		chr1	158588341	158589476		chr12	58545070	58546171		chr10	40591110	40591446		chr3	51587395	51588609		chr13	116385449	116385832		chr16	96149940	96150692
chr14	117109349	117110533		chr13	63405444	63406255		chr1	158589751	158590759		chr12	58964268	58965205		chr10	41294407	41294739		chr3	54558547	54560039		chr13	117805667	117806119		chr17	4626059	4626630
chr14	117784509	117785380		chr13	64416626	64417436		chr1	158941100	158941796		chr12	60206685	60208036		chr10	41702441	41703102		chr3	87980502	87982458		chr14	11346465	11346963		chr17	10689041	10689588
chr14	118149338	118150187		chr13	64499252	64499912		chr1	162770689	162771443		chr12	64118596	64119326		chr10	42488268	42488827		chr3	88578609	88579720		chr14	12190834	12191187		chr17	12612758	12613204
chr14	120757456	120758260		chr13	67369634	67370599		chr1	162908016	162909556		chr12	70860090	70860596		chr10	45568793	45569199		chr3	93247589	93250294		chr14	20815240	20815609		chr17	21588627	21588928
chr14	121402174	121402776		chr13	67379162	67379960		chr1	162909867	162911993		chr12	71022921	71023710		chr10	46909518	46909786		chr3	95461460	95463960		chr14	21008978	21009572		chr17	28186992	28187603
chr14	121636473	121639052		chr13	67551024	67551712		chr1	162915419	162920100		chr12	72145913	72146391		chr10	47302295	47302596		chr3	95861328	95862490		chr14	21803976	21804628		chr17	29416078	29416309
chr14	121636473	121639286		chr13	70728998	70729829		chr1	163308586	163309474		chr12	73682901	73683618		chr10	47372209	47372509		chr3	95907751	95909414		chr14	24046566	24046894		chr17	31507075	31507746
chr14	121636480	121639286		chr13	90150579	90151440		chr1	163309952	163310823		chr12	73851692	73852273		chr10	47373861	47374463		chr3	97266020	97266906		chr14	24913914	24914358		chr17	32007334	32008035
chr15	3399178	3400309		chr13	94007596	94008486		chr1	164170648	164171520		chr12	74984835	74985540		chr10	48769168	48769537		chr3	99958745	99958906		chr14	26058107	26058510		chr17	32519497	32520097
chr15	3557431	3558660		chr13	96692523	96693530		chr1	164478093	164479198		chr12	76640189	76640630		chr10	51488239	51488587		chr3	115939361	115940521		chr14	30515938	30516387		chr17	33088401	33088839
chr15	3570202	3571079		chr13	97949955	97950537		chr1	164827721	164828975		chr12	76947371	76947962		chr10	52590877	52591380		chr3	116462466	116463479		chr14	36498268	36498848		chr17	33229407	33229789
chr15	4627947	4629026		chr13	99693310	99693956		chr1	164893519	164894348		chr12	77532360	77532841		chr10	53114547	53115359		chr3	122922729	122924143		chr14	40061789	40062157		chr17	35516148	35516747
chr15	4676566	4678571		chr13	102046521	102047244		chr1	164916149	164918327		chr12	77641978	77642699		chr10	53649487	53650317		chr3	137526602	137529108		chr14	40078109	40079024		chr17	35939899	35940371
chr15	6170762	6171823		chr13	102452840	102453649		chr1	166150198	166151025		chr12	79087500	79088274		chr10	53737852	53738307		chr3	138151637	138152997		chr14	41193099	41193347		chr17	43250993	43251308
chr15	6391972	6393287		chr13	102527677	102528689		chr1	166254895	166255636		chr12	80504966	80505426		chr10	53762171	53762593		chr3	146060220	146061093		chr14	47283249	47283603		chr17	43808807	43809455
chr15	7192743	7194305		chr13	102571864	102572418		chr1	167159256	167160315		chr12	80536950	80537574		chr10	54913543	54913907		chr3	148721340	148722601		chr14	48141819	48142385		chr17	46457193	46457480
chr15	9532034	9532791		chr13	103670488	103671342		chr1	167257339	167258049		chr12	83557067	83557869		chr10	55032672	55033050		chr3	152376707	152377906		chr14	51908723	51909242		chr17	47440607	47441058
chr15	10309366	10310416		chr13	105406644	105407718		chr1	167260244	167261412		chr12	84429757	84430391		chr10	55923816	55924178		chr4	9062604	9063954		chr14	52365694	52366087		chr17	47978488	47978835
chr15	10648098	10649305		chr13	107726766	107727183		chr1	167351361	167352307		chr12	84792613	84793260		chr10	58928372	58928763		chr4	10843983	10845537		chr14	55626310	55626678		chr17	49766825	49767111
chr15	10650908	10651645		chr13	108646812	108647791		chr1	167413148	167414141		chr12	100673304	100673909		chr10	58939658	58940092		chr4	19968960	19970015		chr14	55699337	55699796		chr17	70353979	70354264
chr15	20930192	20931296		chr13	108652859	108654054		chr1	167414577	167415644		chr12	100740523	100740999		chr10	60600243	60600753		chr4	32443219	32444286		chr14	59189468	59190134		chr17	71102751	71103026
chr15	25069992	25070638		chr13	108855221	108856107		chr1	167433172	167434446		chr12	104052520	104053583		chr10	62420759	62421191		chr4	42632329	42632556		chr14	60124710	60125106		chr17	71312884	71313269
chr15	25076002	25076657		chr13	112388042	112388917		chr1	167439846	167440960		chr12	105459682	105460359		chr10	62876398	62876758		chr4	44179921	44181780		chr14	64098006	64098622		chr17	72185245	72185549
chr15	25460653	25461525		chr13	112768529	112769192		chr1	167524730	167525718		chr12	105574952	105575738		chr10	62877977	62878396		chr4	44246535	44247733		chr14	64281105	64281477		chr17	80324430	80324914
chr15	25531801	25532572		chr13	112920246	112921550		chr1	167545861	167548308		chr12	105576226	105576706		chr10	63547225	63547749		chr4	45206134	45207014		chr14	66234309	66234926		chr17	86439470	86439869
chr15	34833777	34834884		chr13	113106595	113107943		chr1	167690388	167691190		chr12	105613405	105614143		chr10	64118524	64118777		chr4	48048612	48049605		chr14	66237034	66237510		chr18	5640912	5641186
chr15	36223987	36224724		chr13	115251243	115252202		chr1	168290331	168291019		chr12	109369684	109370192		chr10	64118823	64119196		chr4	80975356	80976569		chr14	66255724	66256202		chr18	10749049	10749364
chr15	36828169	36829459		chr13	115473133	115474022		chr1	169177021	169177716		chr12	110759456	110760039		chr10	64328781	64329142		chr4	94714451	94720901		chr14	68249770	68250265		chr18	14932389	14932666
chr15	36913030	36913947		chr13	116964048	116964599		chr1	169186088	169187634		chr12	111462355	111462946		chr10	64827506	64828034		chr4	103235731	103236951		chr14	69448158	69448633		chr18	23940346	23940837
chr15	38278136	38279101		chr14	18497175	18498100		chr1	169279773	169280419		chr12	112285595	112286349		chr10	64831386	64831748		chr4	104694799	104695722		chr14	71081210	71081429		chr18	33640496	33640985
chr15	42725932	42726842		chr14	19019049	19020011		chr1	169304433	169305667		chr12	112678754	112679363		chr10	66510740	66511165		chr4	106925474	106927125		chr14	73445396	73445597		chr18	33938969	33939433
chr15	43290522	43291059		chr14	19589729	19590685		chr1	169317051	169318411		chr12	112827029	112827616		chr10	66528212	66528622		chr4	109722978	109724073		chr14	73693420	73694043		chr18	34227303	34227988
chr15	43507788	43508999		chr14	21572543	21573308		chr1	169548054	169548758		chr12	113332353	113333105		chr10	67681976	67682368		chr4	116792421	116794479		chr14	79373550	79373745		chr18	36552838	36553151
chr15	52395313	52396568		chr14	23236674	23237365		chr1	170292353	170293106		chr12	113823412	113824106		chr10	67710226	67710633		chr4	118219149	118221527		chr14	80879677	80880128		chr18	36562767	36563138
chr15	53120417	53121273		chr14	23446496	23447408		chr1	171964865	171965533		chr12	114379885	114380806		chr10	67783211	67783639		chr4	122896632	122897842		chr14	87812407	87812869		chr18	38059402	38059796
chr15	54409071	54410616		chr14	26299597	26300274		chr1	172222494	172223403		chr12	115291504	115291932		chr10	67814598	67814882		chr4	124526607	124529038		chr14	90051942	90052404		chr18	38422979	38423335
chr15	54877762	54879007		chr14	27335231	27335697		chr1	172254926	172255970		chr12	116840025	116840537		chr10	67859510	67859880		chr4	124761826	124763149		chr14	98105556	98105898		chr18	44612406	44612718
chr15	55754128	55755225		chr14	29451657	29453183		chr1	172425793	172427044		chr12	118963507	118963897		chr10	67919775	67920157		chr4	126429716	126431870		chr14	106003060	106003413		chr18	51377825	51378164
chr15	56111883	56112605		chr14	29582891	29583640		chr1	172446096	172446915		chr13	6058943	6059633		chr10	67995882	67996470		chr4	128357446	128358640		chr14	114931069	114931421		chr18	54640697	54640996
chr15	56249521	56250321		chr14	30802459	30803101		chr1	172537240	172539055		chr13	8697650	8698231		chr10	68200108	68200517		chr4	128388062	128389370		chr14	116823810	116824325		chr18	54791136	54791736
chr15	59026716	59027555		chr14	30917172	30917870		chr1	172626889	172627874		chr13	8861714	8862173		chr10	68464278	68464784		chr4	128601943	128603438		chr14	118079032	118079569		chr18	56825412	56825787
chr15	59316485	59317182		chr14	31641961	31643073		chr1	172810081	172811063		chr13	14049173	14049817		chr10	68570061	68570346		chr4	133074161	133075776		chr14	120228620	120229255		chr18	56964571	56965004
chr15	59324297	59325163		chr14	33807906	33808794		chr1	172967709	172968510		chr13	16372194	16372747		chr10	68628596	68629013		chr4	134408537	134410675		chr14	120229870	120230927		chr18	59302148	59302483
chr15	60023383	60023982		chr14	33848337	33849126		chr1	173098718	173099593		chr13	21292107	21292765		chr10	68653201	68653593		chr4	134907854	134910410		chr14	121859628	121860010		chr18	68095472	68095768
chr15	62536235	62537042		chr14	34284956	34285778		chr1	173142906	173148098		chr13	21493191	21493732		chr10	68703277	68703800		chr4	144835029	144837281		chr14	121870539	121871360		chr18	68634296	68634664
chr15	62581813	62582813		chr14	41739946	41741005		chr1	173154674	173159023		chr13	24406634	24407182		chr10	70646026	70646433		chr4	147411995	147414087		chr15	4511557	4512112		chr18	79231983	79232472
chr15	62633635	62634640		chr14	41744145	41745165		chr1	173190253	173191028		chr13	24421886	24422681		chr10	70696771	70697162		chr4	149183796	149185513		chr15	4628447	4629026		chr19	3950355	3950800
chr15	65905405	65906202		chr14	41762051	41762946		chr1	173273833	173275403		chr13	24444860	24445458		chr10	70843340	70843662		chr4	151656957	151658159		chr15	4676777	4677431		chr19	5278110	5278693
chr15	66441859	66442914		chr14	41778960	41779843		chr1	173367135	173368293		chr13	24446414	24447517		chr10	70852048	70852574		chr4	153348454	153350069		chr15	4746822	4747318		chr19	7197277	7197957
chr15	68119209	68120144		chr14	46134681	46136176		chr1	173369902	173370722		chr13	24455073	24455724		chr10	71001998	71002296		chr4	154428481	154429624		chr15	6170846	6171564		chr19	7865035	7865526
chr15	68870751	68871411		chr14	46148431	46149440		chr1	173371180	173372135		chr13	24456845	24457739		chr10	72600676	72601219		chr5	5693534	5694537		chr15	6209930	6210500		chr19	7904343	7904818
chr15	75035233	75036204		chr14	46463515	46464241		chr1	173382551	173383668		chr13	24469399	24469910		chr10	73838700	73839131		chr5	17291789	17293141		chr15	6989041	6989497		chr19	7967470	7967975
chr15	77106661	77108385		chr14	46840003	46840717		chr1	174057192	174058275		chr13	32916754	32917412		chr10	76138014	76138498		chr5	23605835	23607455		chr15	6994370	6994753		chr19	8326215	8327777
chr15	78377842	78378755		chr14	49244515	49245222		chr1	174241436	174242755		chr13	34383896	34384804		chr10	77072955	77073436		chr5	31108192	31109012		chr15	7070009	7070399		chr19	10268247	10268698
chr15	78680759	78681321		chr14	51627563	51628459		chr1	174562226	174563660		chr13	34718702	34719432		chr10	77155918	77156273		chr5	33360081	33362213		chr15	8188488	8188955		chr19	14706252	14706577
chr15	81169447	81170216		chr14	52641658	52642524		chr1	174580588	174583138		chr13	35243385	35244267		chr10	78812866	78813192		chr5	33971517	33973760		chr15	8242346	8242830		chr19	16441638	16442048
chr15	82279905	82281034		chr14	55052849	55053614		chr1	174861482	174863033		chr13	35875730	35876460		chr10	78879891	78880390		chr5	35290982	35292753		chr15	8273944	8274431		chr19	17475002	17475465
chr15	99692755	99694381		chr14	55201081	55202086		chr1	176596382	176597373		chr13	37729513	37730272		chr10	79838942	79839296		chr5	35917170	35918246		chr15	9064486	9065370		chr19	18693469	18693903
chr16	3843040	3844242		chr14	56184231	56185111		chr1	176696545	176697497		chr13	37736595	37737180		chr10	81683078	81683482		chr5	43493118	43494254		chr15	9077798	9078077		chr19	24249694	24250111
chr16	4727671	4728341		chr14	59816034	59816759		chr1	176701935	176702725		chr13	37755724	37756441		chr10	82362748	82363173		chr5	53045997	53046977		chr15	24999360	24999926		chr19	25245970	25246375
chr16	10638978	10640315		chr14	61267472	61268593		chr1	177459882	177460477		chr13	38181639	38182485		chr10	82787580	82788090		chr5	66115470	66116745		chr15	25365699	25366529		chr19	29057112	29057536
chr16	10648198	10649844		chr14	61305857	61306753		chr1	177576359	177578059		chr13	38443639	38444271		chr10	84348054	84348379		chr5	76056216	76057012		chr15	25402866	25403505		chr19	29454269	29454760
chr16	11403959	11406029		chr14	64737379	64738079		chr1	177592467	177594124		chr13	38588458	38589140		chr10	86246210	86246671		chr5	97557197	97558170		chr15	27308580	27309038		chr19	29487168	29487465
chr16	11406211	11408204		chr14	65708384	65709322		chr1	177595296	177596423		chr13	38646394	38646929		chr10	87290180	87290613		chr5	100406332	100408783		chr15	34628363	34628862		chr19	29927133	29927556
chr16	13774148	13775828		chr14	66628607	66629267		chr1	177622104	177623023		chr13	38769458	38769897		chr10	87294809	87295196		chr5	100675433	100676296		chr15	34834142	34834540		chr19	32329136	32329439
chr16	15550333	15551346		chr14	67687213	67688180		chr1	178912626	178913566		chr13	39539721	39540293		chr10	87357219	87357836		chr5	100779531	100780790		chr15	37735296	37735764		chr19	34401672	34402077
chr16	16569217	16569955		chr14	70732964	70733981		chr1	180118480	180119018		chr13	41499104	41499682		chr10	87977743	87978211		chr5	103303820	103304055		chr15	43446195	43446918		chr19	38414210	38414588
chr16	18404371	18407460		chr14	73573130	73574224		chr1	180165992	180166621		chr13	41979079	41979735		chr10	89094541	89095007		chr5	107717356	107719029		chr15	47592245	47592627		chr19	38561413	38561824
chr16	18407552	18414371		chr14	75158308	75159111		chr1	180259330	180261122		chr13	43598754	43599252		chr10	90495070	90495476		chr5	110535049	110537560		chr15	51378435	51378810		chr19	38630955	38631298
chr16	19031867	19032531		chr14	77679896	77681398		chr1	180298600	180300022		chr13	47345724	47346475		chr10	90632083	90632532		chr5	113662214	113662961		chr15	52399641	52400082		chr19	39580602	39581320
chr16	20109333	20110119		chr14	78061902	78062552		chr1	180911714	180912273		chr13	49573953	49574784		chr10	92542210	92542564		chr5	114622609	114623698		chr15	53374325	53375001		chr19	40321795	40322173
chr16	23317318	23318635		chr14	78072715	78073498		chr1	181489113	181490332		chr13	51196709	51197439		chr10	92884676	92885120		chr5	115574802	115575970		chr15	54874578	54875487		chr19	43659148	43659597
chr16	23988215	23993101		chr14	88865823	88866270		chr1	181772042	181773375		chr13	53071503	53072056		chr10	93086503	93086967		chr5	115798014	115799831		chr15	56075550	56075842		chr19	54049712	54050010
chr16	23988275	23993101		chr14	104759343	104760244		chr1	182159180	182160862		chr13	59100366	59101253		chr10	93667737	93668184		chr5	122448527	122451010		chr15	57299445	57299900		chr19	57332203	57332779
chr16	24081687	24082536		chr14	118547825	118548666		chr1	182707681	182708917		chr13	59102912	59103664		chr10	93684239	93684602		chr5	122499356	122501020		chr15	57924560	57925115		chr2	3649010	3649311
chr16	24260012	24260793		chr14	119350810	119352057		chr1	182876539	182877207		chr13	63427230	63427866		chr10	93817256	93817591		chr5	126798572	126799257		chr15	61848596	61849529		chr2	12821496	12821832
chr16	25911341	25912253		chr14	119379273	119380095		chr1	182910036	182911957		chr13	71004515	71005187		chr10	93929028	93929452		chr5	131433814	131434319		chr15	66615271	66615706		chr2	17532075	17532414
chr16	25945014	25946240		chr14	121472017	121473077		chr1	182934946	182936641		chr13	73940144	73940833		chr10	94227530	94227947		chr5	131995085	131996188		chr15	77168826	77169868		chr2	19623012	19623357
chr16	26562446	26563582		chr14	122588961	122589690		chr1	182939559	182940990		chr13	75982332	75982754		chr10	94462322	94462724		chr5	135476078	135477783		chr15	81130131	81130656		chr2	28317656	28318002
chr16	30385323	30386556		chr15	10121657	10122444		chr1	182944941	182948082		chr13	81493520	81494074		chr10	94766992	94767438		chr5	135483305	135486822		chr15	82444747	82445393		chr2	29346087	29346459
chr16	32651435	32652178		chr15	10139945	10140612		chr1	182967627	182968384		chr13	90069070	90069540		chr10	94803288	94803662		chr5	137458274	137459194		chr15	83631410	83631873		chr2	29520136	29520649
chr16	34269600	34270317		chr15	25891274	25891969		chr1	183185847	183189703		chr13	90675968	90676579		chr10	95409604	95409835		chr5	137625159	137627514		chr15	87798367	87798568		chr2	30141316	30142075
chr16	35487006	35488189		chr15	27407149	27408031		chr1	183405689	183406842		chr13	91036459	91036786		chr10	95429155	95429551		chr5	137632525	137634059		chr15	89762732	89763114		chr2	32521459	32521830
chr16	37873432	37875151		chr15	27911631	27912609		chr1	184342667	184343594		chr13	91880659	91881173		chr10	96116673	96117191		chr5	138882296	138883457		chr15	92401579	92401944		chr2	37954624	37955007
chr16	37902046	37903323		chr15	28341869	28342505		chr1	184409006	184409854		chr13	94004394	94005110		chr10	96463530	96463942		chr5	139959694	139961170		chr15	92681257	92681661		chr2	45436705	45437063
chr16	41161400	41162197		chr15	36066752	36067461		chr1	184532021	184532968		chr13	94423230	94423923		chr10	96555259	96555632		chr5	143666937	143668575		chr15	95574227	95574745		chr2	60256145	60256581
chr16	43169369	43170617		chr15	37385539	37386305		chr1	184539633	184540586		chr13	95168304	95169140		chr10	98204122	98204502		chr5	143941525	143943143		chr15	95579681	95581038		chr2	65955748	65956058
chr16	43297161	43299302		chr15	38325747	38326493		chr1	186647850	186649285		chr13	97286080	97286531		chr10	98301647	98302014		chr5	146616672	146618118		chr15	95594684	95595076		chr2	68855774	68856183
chr16	43323371	43324637		chr15	38351817	38353098		chr1	186650691	186651939		chr13	98623194	98623666		chr10	98509823	98510174		chr5	147071488	147073467		chr15	95819983	95820550		chr2	68857037	68857529
chr16	43420386	43421188		chr15	42507571	42508170		chr1	186674848	186676890		chr13	100800376	100801105		chr10	98580569	98580903		chr5	147477698	147478778		chr15	96733938	96734430		chr2	70824498	70824889
chr16	45984291	45985937		chr15	42550369	42551839		chr1	186691402	186692378		chr13	101346788	101347462		chr10	98695502	98695931		chr5	148422629	148423635		chr15	99621358	99621943		chr2	71473131	71473620
chr16	45989978	45991960		chr15	44471671	44472431		chr1	189038723	189040054		chr13	101986230	101986749		chr10	98818826	98819264		chr5	148713921	148714179		chr16	8816724	8817111		chr2	71577479	71577890
chr16	46508728	46509451		chr15	44507885	44508781		chr1	189308405	189309218		chr13	102143361	102144313		chr10	98819905	98820494		chr5	150326730	150327620		chr16	11423370	11424356		chr2	83673262	83673537
chr16	46833229	46834447		chr15	44514863	44515859		chr1	189485841	189486979		chr13	102188710	102189193		chr10	99017633	99018119		chr5	150992883	150993805		chr16	11766201	11766828		chr2	84295357	84295787
chr16	48764971	48765889		chr15	44578960	44579737		chr1	191745773	191746548		chr13	102646971	102647423		chr10	99142494	99142896		chr6	3150311	3151948		chr16	13689388	13689894		chr2	90949328	90950005
chr16	48767497	48768274		chr15	52905831	52906825		chr1	191865822	191866961		chr13	102767223	102767858		chr10	100952887	100953469		chr6	6231770	6232856		chr16	17532725	17533435		chr2	101569567	101570091
chr16	48890432	48891435		chr15	52946428	52947542		chr1	191866999	191868431		chr13	105075740	105076306		chr10	102224965	102225355		chr6	10136006	10136624		chr16	17719481	17719909		chr2	101832783	101833123
chr16	52081527	52082183		chr15	53083041	53084054		chr1	191868540	191869293		chr13	108456722	108457532		chr10	103135769	103136102		chr6	17631277	17632270		chr16	18846479	18847030		chr2	101878564	101878949
chr16	52329074	52330115		chr15	53116469	53118091		chr1	191948179	191949895		chr13	109509134	109509608		chr10	105004848	105005312		chr6	37820294	37821787		chr16	23249440	23249863		chr2	102669446	102669652
chr16	57155742	57156649		chr15	53128669	53129491		chr1	191956724	191958192		chr13	110671215	110671747		chr10	106782758	106783177		chr6	38303455	38305218		chr16	24330814	24331697		chr2	103476741	103477100
chr16	58454647	58455852		chr15	53167090	53167823		chr1	192025335	192026198		chr13	112986287	112986994		chr10	106790471	106790903		chr6	47634092	47637047		chr16	25544357	25544788		chr2	103943435	103943847
chr16	66040635	66042968		chr15	53167906	53168765		chr1	192027804	192029124		chr13	115255560	115256118		chr10	107946594	107947102		chr6	47689030	47690726		chr16	25899792	25900284		chr2	104386737	104387031
chr16	71664053	71664723		chr15	54418024	54419343		chr1	192657930	192658974		chr13	116385371	116386020		chr10	108323785	108324236		chr6	47717160	47718894		chr16	25945201	25946101		chr2	106535358	106535647
chr16	76398262	76399553		chr15	54783541	54786128		chr1	192994269	192995287		chr13	120276993	120277431		chr10	108955283	108955641		chr6	47721696	47723336		chr16	26566009	26566512		chr2	113380237	113380600
chr16	76454727	76455755		chr15	55009125	55010021		chr1	193078205	193079100		chr13	120277445	120278231		chr10	110238767	110239135		chr6	47785066	47786745		chr16	28906600	28907327		chr2	114253201	114253557
chr16	77360894	77361729		chr15	55580577	55581301		chr1	193112440	193113272		chr14	10420279	10420778		chr10	110643377	110643827		chr6	52141580	52142562		chr16	33153518	33154109		chr2	115834875	115835236
chr16	77551134	77551873		chr15	55607847	55608766		chr1	193208172	193208880		chr14	12262514	12263137		chr10	110826067	110826480		chr6	57652387	57653888		chr16	35743249	35744103		chr2	121959729	121959942
chr16	78555276	78556339		chr15	59307816	59308816		chr1	193237320	193238510		chr14	12401246	12401848		chr10	110958637	110959098		chr6	83390314	83392275		chr16	38097593	38098098		chr2	125424018	125424226
chr16	81138601	81139446		chr15	59575856	59576633		chr1	193259154	193259851		chr14	12485439	12486101		chr10	111016458	111016881		chr6	86353408	86355206		chr16	41086275	41086525		chr2	126533778	126534109
chr16	81366105	81366790		chr15	60573835	60574792		chr1	193267953	193269206		chr14	12591007	12591740		chr10	114774369	114774837		chr6	86517946	86520040		chr16	42309588	42309936		chr2	126742018	126742293
chr16	86622331	86623687		chr15	60750131	60753490		chr1	193317815	193318645		chr14	12592123	12592659		chr10	114997797	114998135		chr6	87281815	87282649		chr16	45644159	45644535		chr2	126863024	126863386
chr16	86808628	86810017		chr15	62047790	62049065		chr1	193318730	193319640		chr14	20984536	20985054		chr10	115515698	115516044		chr6	87406682	87408087		chr16	46101232	46101620		chr2	130994640	130994909
chr16	87627775	87629012		chr15	63987219	63987664		chr1	193335853	193336947		chr14	22488954	22489705		chr10	115929952	115930274		chr6	88479367	88480412		chr16	46131435	46131838		chr2	135806232	135806439
chr16	87635917	87636854		chr15	64166020	64167033		chr1	193465034	193465970		chr14	22814010	22814539		chr10	116518936	116519337		chr6	88876559	88878265		chr16	46798504	46798947		chr2	140566338	140566746
chr16	87690333	87691529		chr15	66742474	66743222		chr1	193486818	193488001		chr14	26602476	26603017		chr10	116779872	116780544		chr6	100520723	100521789		chr16	46833556	46834207		chr2	156221030	156221391
chr16	88252281	88253368		chr15	66761577	66762419		chr1	193516762	193517753		chr14	26614776	26615258		chr10	116892193	116892527		chr6	108134945	108136125		chr16	52267340	52267910		chr2	156683200	156683505
chr16	98013725	98014885		chr15	66781158	66782006		chr1	193662853	193663999		chr14	33289611	33290332		chr10	116931377	116931777		chr6	108610571	108610979		chr16	52676055	52676405		chr2	157863289	157863736
chr17	10484031	10484645		chr15	66791742	66792435		chr1	193664407	193665382		chr14	37733014	37733802		chr10	117166364	117166856		chr6	113443977	113445338		chr16	52689609	52689981		chr2	160673323	160673794
chr17	13123400	13123991		chr15	66793693	66794513		chr1	193715622	193716400		chr14	37802591	37803355		chr10	118066851	118067321		chr6	114290764	114292423		chr16	55617796	55617968		chr2	160685080	160685416
chr17	26869600	26870329		chr15	66850205	66852083		chr1	193734266	193735175		chr14	41192920	41193553		chr10	118699831	118700247		chr6	120117615	120117880		chr16	56848158	56848740		chr2	161825365	161825569
chr17	28556937	28557968		chr15	68824132	68825006		chr1	193906256	193907166		chr14	41694169	41694731		chr10	118884637	118885050		chr6	125826569	125827536		chr16	60232757	60233107		chr2	166646915	166647229
chr17	29278580	29279480		chr15	73401222	73402114		chr1	193927752	193928638		chr14	41909368	41910077		chr10	118931707	118932109		chr6	131327247	131328150		chr16	66042288	66042714		chr2	167478182	167478676
chr17	29607122	29607988		chr15	74614255	74615155		chr1	194653940	194654464		chr14	41913856	41914377		chr10	118934725	118935149		chr6	131337350	131338891		chr16	77421701	77422185		chr2	178242936	178243503
chr17	29623643	29624933		chr15	74760702	74761505		chr1	194982209	194984164		chr14	41917853	41918752		chr10	120732511	120732992		chr6	132413309	132413988		chr16	79005260	79005626		chr3	7645413	7645761
chr17	31746617	31747451		chr15	74790785	74791775		chr1	195096899	195099667		chr14	41953807	41954474		chr10	120882861	120883375		chr6	134933202	134934334		chr16	87690707	87691491		chr3	9725518	9725868
chr17	33071699	33073428		chr15	75208380	75209060		chr1	195132739	195133622		chr14	46635284	46635950		chr10	120949988	120950499		chr6	136670589	136670840		chr16	88252456	88253337		chr3	14859199	14859643
chr17	35100882	35102068		chr15	75505933	75506641		chr1	195137495	195138432		chr14	46636631	46637422		chr10	121059506	121059985		chr6	145197436	145199702		chr16	88412401	88412796		chr3	22022787	22023390
chr17	43406574	43408682		chr15	77489884	77491048		chr1	195140483	195141360		chr14	46680632	46681225		chr10	121210801	121211302		chr6	145489110	145490143		chr16	95264344	95264886		chr3	27589008	27589467
chr17	43411602	43413368		chr15	79527033	79527973		chr1	197047694	197048577		chr14	47811403	47812067		chr10	121763913	121764291		chr6	145880920	145881858		chr16	96483701	96484308		chr3	29918357	29918758
chr17	46574669	46577028		chr15	79913612	79914442		chr1	197067541	197068283		chr14	55710677	55711510		chr10	121817050	121817485		chr6	146449835	146451410		chr16	97208684	97209379		chr3	36516024	36516328
chr17	49406215	49406926		chr15	83687341	83688136		chr10	3205373	3206476		chr14	55771657	55772369		chr10	121823769	121824216		chr6	146479458	146480377		chr16	97446671	97447191		chr3	37614702	37615069
chr17	49489826	49490586		chr15	83943039	83944046		chr10	4521745	4522941		chr14	57707815	57708457		chr10	121937160	121937550		chr7	6106186	6108907		chr17	5569235	5569703		chr3	37662592	37662940
chr17	51129917	51130837		chr15	83944052	83946452		chr10	4540162	4541098		chr14	62868050	62868671		chr10	121952749	121953242		chr7	14398501	14400207		chr17	8547165	8547586		chr3	37775024	37775358
chr17	63359748	63360738		chr15	83961309	83963270		chr10	5672690	5673541		chr14	63124986	63125755		chr10	122557712	122558509		chr7	25183957	25185366		chr17	12223335	12223596		chr3	54573520	54573846
chr17	65089981	65091047		chr15	84026449	84027872		chr10	5720666	5722294		chr14	63128257	63128725		chr10	123280612	123281138		chr7	26855198	26858004		chr17	12437887	12438386		chr3	54951115	54951542
chr17	65094733	65098047		chr15	85920210	85921043		chr10	5724608	5725918		chr14	63724414	63725093		chr10	123656507	123656916		chr7	30065269	30067913		chr17	15478384	15478894		chr3	62237602	62237894
chr17	65926163	65926943		chr15	90423218	90423983		chr10	5728195	5728903		chr14	63831047	63831533		chr10	124072176	124072569		chr7	51803387	51804725		chr17	15728368	15728811		chr3	65150092	65150496
chr17	70309998	70310777		chr15	90508734	90509897		chr10	5741017	5742204		chr14	64812591	64813275		chr10	124783347	124783896		chr7	52622048	52623537		chr17	18460046	18460458		chr3	67125577	67125960
chr17	71551282	71552077		chr15	91021089	91022721		chr10	7500025	7501410		chr14	65251034	65251710		chr10	124807110	124807620		chr7	52650357	52651870		chr17	24380230	24380945		chr3	69057073	69057358
chr17	74344929	74346556		chr15	96430119	96431277		chr10	7806184	7807513		chr14	65276391	65277317		chr10	124926960	124927967		chr7	63274027	63275342		chr17	25205204	25205727		chr3	73502804	73503196
chr17	75004247	75004988		chr15	96548843	96549370		chr10	7946209	7946959		chr14	65473976	65474679		chr10	125388712	125389068		chr7	80772643	80773402		chr17	29592031	29592767		chr3	75296880	75297201
chr17	75905557	75906526		chr15	96991895	96992442		chr10	8605449	8606916		chr14	66391824	66392508		chr10	125401686	125402145		chr7	88933673	88934999		chr17	31241920	31242344		chr3	87605569	87605988
chr17	80005251	80006112		chr15	97064499	97065433		chr10	8670459	8671765		chr14	66482887	66483363		chr10	125552418	125552801		chr7	89919261	89920702		chr17	31743744	31744204		chr3	94781268	94781597
chr17	80478381	80479386		chr15	97078105	97079217		chr10	8703043	8703763		chr14	66626861	66627571		chr10	126841807	126842296		chr7	105208177	105208770		chr17	34962169	34962870		chr3	98002067	98002501
chr17	83821280	83821905		chr15	97116975	97117764		chr10	9620649	9622337		chr14	70451323	70451938		chr10	127788302	127788715		chr7	107730799	107731812		chr17	36567066	36567767		chr3	98779703	98779977
chr17	83963133	83964028		chr15	98399076	98399599		chr10	11018040	11018892		chr14	70732136	70732817		chr10	128039363	128039972		chr7	112884360	112886157		chr17	37305244	37305581		chr3	103051925	103052160
chr17	84625834	84626705		chr15	98522300	98523236		chr10	12529400	12530222		chr14	75550309	75550980		chr10	128466351	128466628		chr7	120096781	120098988		chr17	42179134	42179556		chr3	108171546	108171986
chr17	85141952	85143220		chr15	98633165	98633876		chr10	13750025	13750935		chr14	76190067	76190780		chr11	3131769	3132230		chr7	120656436	120658206		chr17	43407057	43407752		chr3	131133894	131134244
chr17	85493361	85494202		chr15	99226945	99227812		chr10	15466286	15467240		chr14	76201952	76202634		chr11	3155872	3156668		chr7	129244612	129245844		chr17	43447064	43447666		chr3	133180380	133180741
chr17	88416252	88416763		chr15	101732851	101733918		chr10	17995908	17996652		chr14	77235969	77236845		chr11	5326279	5326876		chr7	133838839	133839689		chr17	43726724	43727210		chr3	133193129	133193393
chr17	92272643	92273443		chr15	102886640	102887353		chr10	18119559	18121411		chr14	77237340	77238022		chr11	6011773	6012135		chr7	134071875	134073303		chr17	44194047	44194595		chr3	142161924	142162266
chr18	3423287	3424478		chr16	4369909	4371450		chr10	18400402	18401419		chr14	93473968	93474537		chr11	6233327	6233807		chr7	134396772	134398849		chr17	50427802	50428027		chr3	142222597	142223128
chr18	5006952	5008780		chr16	4725933	4726691		chr10	19710982	19711614		chr14	100494681	100495185		chr11	7020718	7021069		chr7	140877050	140878038		chr17	51991871	51992480		chr3	142388366	142388840
chr18	7657444	7658384		chr16	8525132	8525960		chr10	19893548	19894020		chr14	101916368	101916972		chr11	11964020	11964431		chr7	140974310	140978459		chr17	58205736	58206222		chr3	142397308	142397753
chr18	7779820	7780909		chr16	8535071	8536061		chr10	19906397	19907363		chr14	114565090	114565718		chr11	12136282	12136777		chr7	146432970	146435209		chr17	65926263	65926684		chr3	145692158	145692610
chr18	10180695	10181416		chr16	13313165	13314130		chr10	19922847	19923786		chr14	115451550	115452269		chr11	12395388	12395818		chr7	148838435	148839412		chr17	68661853	68662347		chr3	152157582	152158011
chr18	10700298	10701065		chr16	13330242	13331007		chr10	19954038	19954851		chr14	118215811	118216513		chr11	12401480	12401830		chr7	149087324	149089081		chr17	71010697	71011147		chr4	3080578	3080880
chr18	12708540	12709810		chr16	13940229	13941070		chr10	20309785	20310681		chr14	120228528	120229360		chr11	16601690	16602269		chr8	3556180	3556439		chr17	74468034	74468546		chr4	7746927	7747285
chr18	12713132	12715137		chr16	20418136	20418789		chr10	20495166	20495934		chr14	120656469	120656930		chr11	16603163	16603632		chr8	13103876	13106801		chr17	75730742	75731191		chr4	19912505	19912884
chr18	12793028	12798951		chr16	20536885	20537656		chr10	21013864	21014708		chr14	121231008	121231732		chr11	18066395	18066719		chr8	18137748	18138716		chr17	76174822	76175293		chr4	34791554	34791769
chr18	12799970	12801314		chr16	21878679	21879588		chr10	21015035	21016111		chr14	121637828	121638674		chr11	18829815	18830183		chr8	23968778	23971158		chr17	81767785	81768303		chr4	40198662	40199129
chr18	12836837	12838314		chr16	23350613	23352185		chr10	21114690	21115722		chr14	122392758	122393570		chr11	19191717	19192029		chr8	25163718	25164587		chr17	81775133	81775705		chr4	42780792	42781006
chr18	12852283	12853455		chr16	24447342	24448186		chr10	21163774	21164986		chr14	123300225	123301013		chr11	19454660	19454922		chr8	26310914	26312766		chr17	81784779	81785322		chr4	43415160	43415532
chr18	15440065	15440892		chr16	24504871	24505781		chr10	21329151	21329938		chr15	3434959	3435676		chr11	19841103	19841562		chr8	28183598	28185046		chr17	81926488	81926948		chr4	43534789	43535294
chr18	29934065	29935075		chr16	24961366	24961958		chr10	22856721	22857831		chr15	3670788	3671324		chr11	19892869	19893388		chr8	34819454	34820401		chr17	85189063	85189446		chr4	45650607	45651006
chr18	33352023	33353054		chr16	29903210	29904115		chr10	23197094	23197888		chr15	7093556	7094215		chr11	20858276	20858640		chr8	36650432	36653112		chr17	86883223	86884339		chr4	46289967	46290404
chr18	36814852	36816797		chr16	30415250	30416641		chr10	23390901	23391597		chr15	10216153	10216452		chr11	20893535	20893964		chr8	41595954	41598058		chr17	87020392	87020814		chr4	54970163	54970607
chr18	38694063	38694716		chr16	30821197	30822131		chr10	23430891	23431941		chr15	10911155	10911632		chr11	21327126	21327516		chr8	42324337	42325784		chr17	89021365	89022136		chr4	59375832	59376349
chr18	38939138	38940998		chr16	30973061	30974202		chr10	23473979	23474577		chr15	12241792	12242221		chr11	22394927	22395321		chr8	49331980	49333668		chr18	3266355	3266899		chr4	60200706	60201070
chr18	39097824	39098466		chr16	32555500	32556362		chr10	23571033	23571948		chr15	21976514	21977221		chr11	22726028	22726475		chr8	63471313	63472999		chr18	3420692	3421119		chr4	60409015	60409340
chr18	39145577	39146395		chr16	33123893	33124847		chr10	23604714	23605326		chr15	25402632	25403426		chr11	26344345	26344668		chr8	72424862	72428299		chr18	5681100	5681871		chr4	61417420	61417807
chr18	39698483	39699444		chr16	33163177	33164152		chr10	23643545	23644504		chr15	25631931	25632541		chr11	27760025	27760428		chr8	72825716	72827196		chr18	6251636	6252100		chr4	61490188	61490696
chr18	39874804	39875739		chr16	33885848	33886811		chr10	23794334	23794949		chr15	34419361	34420026		chr11	27798688	27798995		chr8	73132756	73136425		chr18	8906584	8907159		chr4	95620802	95621114
chr18	43023370	43024482		chr16	35249631	35250468		chr10	24036686	24037509		chr15	35842737	35843440		chr11	28585474	28585768		chr8	73956487	73957584		chr18	9489887	9491956		chr4	99483731	99484292
chr18	43291263	43291988		chr16	35870702	35872322		chr10	24254449	24255241		chr15	40271352	40271810		chr11	28602366	28602914		chr8	73998958	74001199		chr18	12708612	12709250		chr4	105049273	105049649
chr18	44232529	44233299		chr16	44483994	44484950		chr10	24422108	24423139		chr15	40280060	40280653		chr11	28902623	28903028		chr8	74474266	74475476		chr18	12713583	12714524		chr4	105845841	105846178
chr18	45588740	45589507		chr16	50738407	50739411		chr10	24631831	24635145		chr15	41575688	41576388		chr11	29513033	29513667		chr8	74842344	74844984		chr18	12773379	12773872		chr4	106595962	106596403
chr18	45736425	45737261		chr16	52145516	52146316		chr10	24662276	24663201		chr15	41672415	41673167		chr11	29708163	29709177		chr8	83402404	83405048		chr18	12778361	12780556		chr4	108108789	108109263
chr18	46291972	46293015		chr16	64584228	64585051		chr10	24667188	24669623		chr15	53091478	53091934		chr11	32038387	32038741		chr8	86222357	86223643		chr18	12890330	12891317		chr4	115523213	115523563
chr18	46614628	46615750		chr16	72649366	72649966		chr10	25254822	25256995		chr15	53102953	53103648		chr11	32050604	32050926		chr8	86238354	86239981		chr18	13051605	13052063		chr4	116601422	116601804
chr18	46803782	46805227		chr16	76232218	76232844		chr10	26070754	26071381		chr15	53117309	53117853		chr11	33003204	33003988		chr8	86280185	86281372		chr18	17781559	17781982		chr4	117504033	117504471
chr18	59282510	59283154		chr16	76349063	76349932		chr10	27824983	27825623		chr15	53218026	53218648		chr11	33304648	33305059		chr8	87182527	87189668		chr18	20360022	20360489		chr4	119799573	119799899
chr18	59376706	59378212		chr16	77013071	77013910		chr10	28142041	28143006		chr15	54409289	54409903		chr11	34444243	34445030		chr8	87363739	87365115		chr18	21085823	21086206		chr4	120189052	120189474
chr18	60545071	60545872		chr16	78577079	78578126		chr10	29851992	29852943		chr15	54877999	54878492		chr11	34495006	34495920		chr8	87508494	87508736		chr18	21232034	21232513		chr4	125572106	125572354
chr18	64169304	64170157		chr16	91784337	91785257		chr10	30319929	30321437		chr15	58724775	58725257		chr11	34809038	34809398		chr8	87635259	87636356		chr18	28439300	28439633		chr4	125972316	125972678
chr18	64235001	64236555		chr16	91786414	91787285		chr10	31326995	31328313		chr15	60752662	60753269		chr11	35271532	35271953		chr8	89268911	89270667		chr18	30910395	30910825		chr4	135415830	135416298
chr18	64238537	64239801		chr16	91829240	91830157		chr10	33531952	33532756		chr15	65625012	65625659		chr11	35772575	35773055		chr8	91349290	91350459		chr18	35437462	35438060		chr4	138665823	138666222
chr18	64766256	64767399		chr16	91837303	91838456		chr10	33534010	33534737		chr15	65905431	65906597		chr11	36963482	36963824		chr8	96702385	96705343		chr18	35817411	35818268		chr4	144532348	144532632
chr18	74460921	74461727		chr16	92105695	92106430		chr10	33536496	33537331		chr15	66737424	66738341		chr11	42072542	42072904		chr8	97778358	97779366		chr18	39875353	39875665		chr4	148523723	148524208
chr18	75238326	75239162		chr16	93456939	93457859		chr10	33859308	33860103		chr15	66894222	66894951		chr11	43830680	43830964		chr8	106390686	106391592		chr18	43023547	43024223		chr4	149434926	149435373
chr18	81388513	81389719		chr16	93929234	93930875		chr10	37045057	37046189		chr15	75150349	75151251		chr11	44901042	44901440		chr8	108404017	108405432		chr18	43135367	43135882		chr4	149862232	149862575
chr18	84854900	84855682		chr16	94519479	94520219		chr10	39153972	39154722		chr15	75579821	75580142		chr11	44991382	44991953		chr8	109157009	109158542		chr18	51621439	51622066		chr5	3418262	3418615
chr18	90394245	90395778		chr16	95991065	95992065		chr10	39343431	39345330		chr15	75741249	75741924		chr11	44992373	44992853		chr8	113521163	113522167		chr18	54284800	54285471		chr5	4961425	4962040
chr18	90527088	90527960		chr16	98143970	98144846		chr10	39345345	39346376		chr15	75785529	75786291		chr11	45694721	45695066		chr8	119032259	119033399		chr18	54317727	54318181		chr5	24593856	24594361
chr19	8955020	8956161		chr17	3128562	3129057		chr10	39379208	39380489		chr15	75795768	75796479		chr11	45849871	45850265		chr8	122434257	122435489		chr18	55634836	55635232		chr5	24672434	24672744
chr19	12687903	12688896		chr17	3382386	3382850		chr10	39710726	39711545		chr15	76972779	76973939		chr11	49654137	49654556		chr8	124792871	124794148		chr18	56098922	56099443		chr5	31268644	31268929
chr19	12769300	12771487		chr17	3461448	3463035		chr10	39726666	39727427		chr15	77041706	77042334		chr11	49989592	49990388		chr8	125074419	125076230		chr18	56566809	56567578		chr5	34029813	34030205
chr19	12858201	12859020		chr17	4974606	4975444		chr10	39861490	39862658		chr15	77211743	77212447		chr11	52023807	52024200		chr8	125201256	125203302		chr18	59126395	59126665		chr5	36483781	36484163
chr19	16707438	16708297		chr17	5003186	5003698		chr10	39908464	39909247		chr15	79212938	79213449		chr11	52214966	52215371		chr8	127078953	127080526		chr18	64190732	64191082		chr5	41461076	41461443
chr19	18441160	18442051		chr17	5049186	5049944		chr10	40047600	40048509		chr15	81756254	81756748		chr11	53172058	53172284		chr8	127536263	127537376		chr18	69830817	69831299		chr5	44462736	44463079
chr19	20629470	20630468		chr17	5085600	5086506		chr10	41970836	41971674		chr15	82036522	82037792		chr11	54153418	54153828		chr9	14184576	14185846		chr18	69853051	69853245		chr5	54393589	54393918
chr19	20769271	20769834		chr17	5178267	5179157		chr10	42221282	42222966		chr15	82212793	82213622		chr11	54168599	54169090		chr9	14938677	14940746		chr18	70082913	70083353		chr5	64479865	64480371
chr19	21371692	21372765		chr17	5207543	5208700		chr10	42428863	42429471		chr15	82253719	82254531		chr11	54388221	54388626		chr9	19379666	19380496		chr18	72854821	72855318		chr5	64756519	64756983
chr19	21568625	21569383		chr17	5805562	5806330		chr10	42480628	42481440		chr15	82403304	82403735		chr11	55023215	55023931		chr9	20818972	20821407		chr18	74452625	74453110		chr5	73087480	73087907
chr19	23130914	23132863		chr17	11511585	11512507		chr10	43030514	43031384		chr15	82474124	82474720		chr11	55878641	55879033		chr9	22029562	22031078		chr18	75262985	75263585		chr5	73399434	73399873
chr19	26897156	26898689		chr17	12465710	12466641		chr10	43032471	43033269		chr15	82577772	82578468		chr11	57794994	57795809		chr9	23352050	23353236		chr18	78659654	78660052		chr5	89959440	89959767
chr19	26945591	26946498		chr17	14300605	14301288		chr10	43209282	43210178		chr15	83362295	83362898		chr11	59648098	59648478		chr9	41931706	41932826		chr19	4800402	4800881		chr5	97351039	97351350
chr19	27663086	27663879		chr17	15204943	15206724		chr10	43461912	43462895		chr15	83986178	83987020		chr11	62254335	62254725		chr9	42752327	42753317		chr19	12758774	12759136		chr5	97491126	97491452
chr19	29034799	29035385		chr17	15214089	15215576		chr10	44015358	44016153		chr15	84471243	84471792		chr11	63789934	63790990		chr9	50731231	50732140		chr19	12921440	12921632		chr5	99761011	99761457
chr19	29192367	29193468		chr17	17520417	17521414		chr10	44174504	44175289		chr15	85583096	85583522		chr11	64400251	64401223		chr9	50812277	50812465		chr19	23135494	23136148		chr5	99962351	99962680
chr19	29194421	29196109		chr17	21787217	21787940		chr10	44196678	44197505		chr15	85591352	85592174		chr11	67052277	67052643		chr9	51975714	51977773		chr19	23199944	23200935		chr5	104408363	104408665
chr19	31964073	31966132		chr17	21816421	21817240		chr10	44419665	44420470		chr15	85641347	85641838		chr11	67328579	67329984		chr9	56070912	56072051		chr19	23599042	23599260		chr5	106230200	106230625
chr19	32606493	32607758		chr17	24911421	24912205		chr10	44486116	44487017		chr15	89205408	89206133		chr11	67440618	67441135		chr9	56842232	56843790		chr19	23950341	23950811		chr5	110824324	110824644
chr19	33153001	33154077		chr17	25357332	25358317		chr10	44737193	44738512		chr15	89307597	89308122		chr11	70098409	70098717		chr9	61793748	61794947		chr19	26494279	26494742		chr5	111609113	111609553
chr19	36854774	36856306		chr17	25401212	25402038		chr10	44820162	44821007		chr15	95580388	95580969		chr11	70492052	70492498		chr9	63205680	63206860		chr19	26783592	26784052		chr5	117535314	117535634
chr19	37148942	37149775		chr17	26116639	26118226		chr10	44823567	44824463		chr15	96509004	96509668		chr11	70830466	70831108		chr9	66642522	66644238		chr19	33223702	33224233		chr5	117745003	117745424
chr19	37938075	37938590		chr17	27711542	27712473		chr10	52136900	52138687		chr15	97106875	97107561		chr11	70952091	70952516		chr9	71958267	71960401		chr19	34277831	34278234		chr5	117753050	117753379
chr19	39911645	39912146		chr17	27758636	27759652		chr10	53088672	53089651		chr15	99223766	99224664		chr11	72069932	72070356		chr9	72960656	72961952		chr19	34930861	34931426		chr5	119835076	119835448
chr19	39984391	39985055		chr17	27926817	27927643		chr10	53102326	53103393		chr15	99540688	99541174		chr11	72881127	72881559		chr9	74708880	74711630		chr19	39287180	39287850		chr5	121357402	121357891
chr19	39997840	39998713		chr17	29096829	29097705		chr10	53713555	53714351		chr15	99556076	99556547		chr11	75502857	75503312		chr9	75755541	75755735		chr19	39421536	39422067		chr5	122450148	122450773
chr19	40162664	40163482		chr17	29307802	29308493		chr10	57213519	57214447		chr15	100296513	100297323		chr11	76795118	76795471		chr9	79633125	79633385		chr19	39626901	39627405		chr5	122458076	122458641
chr19	40264946	40265742		chr17	29390640	29391148		chr10	57959899	57961720		chr15	100304173	100304788		chr11	78108108	78108431		chr9	88447533	88448504		chr19	39721994	39722453		chr5	122466460	122467779
chr19	40266252	40266870		chr17	29395512	29396579		chr10	58893876	58894872		chr15	100909121	100909778		chr11	79373983	79374685		chr9	95649739	95650823		chr19	44845804	44846323		chr5	125755144	125755557
chr19	43822250	43822859		chr17	29625248	29626227		chr10	58939515	58940320		chr15	101752564	101753213		chr11	80028866	80029334		chr9	99341863	99343231		chr19	46173730	46174984		chr5	128102969	128103392
chr19	43840411	43841425		chr17	31899857	31900668		chr10	59236734	59237520		chr15	101856812	101857480		chr11	81302198	81302494		chr9	100445486	100447597		chr19	46309039	46309284		chr5	129997927	129998344
chr19	44130407	44131331		chr17	33026596	33027513		chr10	59247689	59248486		chr15	102227005	102227855		chr11	81833253	81833687		chr9	100957753	100959471		chr19	49434742	49435527		chr5	131995552	131995798
chr19	46118564	46119362		chr17	34331031	34332308		chr10	59341832	59343339		chr15	102392724	102393270		chr11	83736072	83736589		chr9	102715664	102716778		chr19	55224467	55225206		chr5	132804993	132805413
chr19	46604394	46605249		chr17	40943224	40944357		chr10	59361936	59364215		chr16	4374595	4375269		chr11	83743794	83744282		chr9	105721140	105722280		chr19	56262624	56263073		chr5	132891595	132891870
chr19	56758835	56759577		chr17	43313911	43314797		chr10	59378365	59379750		chr16	4908030	4908610		chr11	84060900	84061263		chr9	107416010	107417477		chr19	58165393	58165815		chr5	133021634	133022068
chr19	57620267	57621527		chr17	43939892	43941170		chr10	59413308	59415517		chr16	5532280	5532958		chr11	84496283	84496811		chr9	108248940	108250949		chr19	58629405	58629925		chr5	137396601	137396945
chr19	57999769	58001135		chr17	45082044	45082680		chr10	59465099	59466683		chr16	9527108	9528026		chr11	84794160	84794614		chr9	108661801	108662786		chr19	59749283	59749926		chr5	139098004	139098257
chr19	58529685	58530549		chr17	45844912	45845787		chr10	59740099	59741475		chr16	9588469	9589028		chr11	85764109	85764449		chr9	110183604	110184377		chr19	61126965	61127605		chr5	139184662	139184942
chr2	3332701	3333756		chr17	45879163	45880461		chr10	59752892	59753574		chr16	10972374	10972835		chr11	86194959	86195739		chr9	114896827	114897981		chr2	3273511	3273955		chr5	139454763	139455196
chr2	4910528	4911928		chr17	46087391	46088469		chr10	60283168	60283754		chr16	16543564	16544273		chr11	86348077	86348337		chr9	121185676	121187441		chr2	7190199	7190574		chr5	146183049	146183644
chr2	4913585	4915051		chr17	51317173	51318188		chr10	60600128	60600873		chr16	18187074	18187631		chr11	86498856	86499202		chr9	122938728	122939765		chr2	8889898	8890292		chr5	146230483	146230967
chr2	5531096	5531998		chr17	53972498	53972992		chr10	60662304	60662872		chr16	18411756	18412414		chr11	87743986	87744307		chrX	7417974	7420002		chr2	10595367	10595771		chr5	146339815	146341220
chr2	7500597	7501482		chr17	57337195	57338610		chr10	60740587	60741357		chr16	18416201	18416897		chr11	87875438	87875832		chrX	7828834	7829880		chr2	12069498	12069958		chr5	146345391	146345921
chr2	8045593	8046436		chr17	63752028	63753021		chr10	60875579	60876497		chr16	18433166	18434153		chr11	89775900	89776378		chrX	12806982	12808877		chr2	12351260	12351850		chr5	146357810	146358266
chr2	11368922	11369800		chr17	69741713	69742500		chr10	60913390	60915255		chr16	18906006	18906510		chr11	89867500	89867916		chrX	12857080	12858775		chr2	15018259	15018419		chr5	146397852	146398444
chr2	18024702	18025513		chr17	73193692	73195057		chr10	61108985	61109926		chr16	22950848	22951490		chr11	89993879	89994212		chrX	17738775	17740469		chr2	22519248	22519683		chr5	146531539	146532034
chr2	22518951	22519679		chr17	83740490	83741690		chr10	61912088	61913279		chr16	23194052	23194588		chr11	90230978	90231431		chrX	20280683	20282098		chr2	27404120	27404842		chr5	146548204	146548633
chr2	23874102	23875089		chr17	84804741	84805606		chr10	62113329	62114560		chr16	23290132	23290779		chr11	90249431	90249840		chrX	20396124	20397404		chr2	28861666	28862140		chr5	146617012	146617831
chr2	25211815	25212870		chr17	85388642	85389450		chr10	62527767	62529288		chr16	23985207	23985671		chr11	93594935	93595352		chrX	33651668	33652744		chr2	34341475	34342118		chr5	148713729	148714272
chr2	34955086	34957505		chr17	87112841	87113418		chr10	66372644	66373646		chr16	23988291	23988783		chr11	95570887	95571326		chrX	35542454	35544031		chr2	34924634	34925176		chr6	7971693	7971985
chr2	35039635	35040735		chr17	87156733	87157747		chr10	66390912	66391969		chr16	24103417	24104160		chr11	95585773	95586200		chrX	45527823	45528727		chr2	36117530	36117991		chr6	27886547	27886883
chr2	38367840	38369218		chr17	87662015	87663363		chr10	66488115	66489362		chr16	24223109	24224539		chr11	96443830	96444241		chrX	45696198	45697477		chr2	38697176	38697302		chr6	34131801	34132253
chr2	41877551	41878765		chr17	88073324	88073810		chr10	66518695	66519727		chr16	24225725	24226597		chr11	96484127	96484503		chrX	57656761	57658335		chr2	41894661	41895201		chr6	34429584	34429904
chr2	43422114	43422762		chr17	88380135	88380654		chr10	66549918	66550888		chr16	24240685	24241319		chr11	97455326	97455794		chrX	65931145	65932208		chr2	43101320	43101770		chr6	36126714	36127161
chr2	43997321	43998825		chr18	4841889	4842798		chr10	66761642	66762649		chr16	26384200	26384832		chr11	97723468	97723921		chrX	68898297	68899076		chr2	50737011	50737567		chr6	37503870	37504332
chr2	50263012	50263753		chr18	4980031	4980722		chr10	67520264	67521282		chr16	26562753	26563396		chr11	98971687	98972308		chrX	70299071	70299962		chr2	51572306	51572609		chr6	37550880	37551519
chr2	51678504	51679162		chr18	5092510	5093439		chr10	67587552	67588202		chr16	26705615	26707125		chr11	99073272	99073707		chrX	71268311	71269867		chr2	53427029	53427418		chr6	37567018	37567996
chr2	52157465	52158245		chr18	10683479	10684436		chr10	67589148	67590990		chr16	26755341	26756103		chr11	99180450	99180867		chrX	71329686	71331491		chr2	55263656	55264162		chr6	37568893	37569749
chr2	56465463	56466599		chr18	12053742	12054294		chr10	67673258	67675746		chr16	30258468	30259055		chr11	99310064	99310695		chrX	71557888	71559055		chr2	60420803	60421551		chr6	37631159	37631679
chr2	59964702	59965733		chr18	12268022	12268895		chr10	67738786	67740861		chr16	30412622	30413380		chr11	100677929	100678639		chrX	82818983	82820084		chr2	61312785	61313467		chr6	37803326	37803753
chr2	61414748	61415542		chr18	21530779	21531435		chr10	67991740	67993421		chr16	30414222	30414751		chr11	101316897	101317356		chrX	83020946	83022968		chr2	63670179	63670602		chr6	38862832	38863226
chr2	63699378	63700588		chr18	32098798	32100107		chr10	67995708	67996694		chr16	33835903	33836458		chr11	101483385	101483873		chrX	84483481	84483976		chr2	63699537	63700614		chr6	47754198	47754605
chr2	64278899	64279870		chr18	36659792	36660385		chr10	68003738	68004751		chr16	35490698	35491315		chr11	102404975	102405465		chrX	91048165	91049558		chr2	63881963	63882423		chr6	48127943	48128265
chr2	67561191	67562791		chr18	38220943	38221730		chr10	68020943	68021884		chr16	38057890	38058756		chr11	102452482	102452878		chrX	91457354	91458936		chr2	64278951	64279558		chr6	49282036	49282302
chr2	67806683	67807612		chr18	38573984	38575059		chr10	68673653	68674888		chr16	38286422	38287006		chr11	106323664	106324045		chrX	92110690	92111591		chr2	67561382	67562019		chr6	50030433	50030785
chr2	67808270	67811066		chr18	38587188	38588673		chr10	68675216	68677215		chr16	38618191	38618556		chr11	107727678	107728110		chrX	96132001	96133908		chr2	69301233	69301499		chr6	51490583	51490966
chr2	67817216	67818254		chr18	39525524	39526789		chr10	68681087	68682439		chr16	43367158	43367861		chr11	108246592	108247046		chrX	96273343	96274396		chr2	78491754	78492169		chr6	51607622	51608185
chr2	69223836	69224936		chr18	42956019	42957051		chr10	68767959	68768872		chr16	45984651	45985645		chr11	108257341	108257926		chrX	98469193	98470092		chr2	84081356	84081781		chr6	51682535	51682915
chr2	71986332	71991406		chr18	43409554	43410625		chr10	69047820	69048496		chr16	46605252	46605957		chr11	109005605	109006036		chrX	100688306	100689677		chr2	86679426	86679815		chr6	52009126	52009467
chr2	71991484	71995202		chr18	44140349	44141299		chr10	69379203	69380112		chr16	46798599	46799063		chr11	109131372	109131939		chrX	100817182	100818411		chr2	91603147	91603577		chr6	52956007	52956368
chr2	73809005	73809953		chr18	44788088	44788886		chr10	69390828	69391839		chr16	52249790	52250335		chr11	109200883	109201198		chrX	101015426	101018019		chr2	93513796	93514350		chr6	54594372	54594701
chr2	104423052	104423966		chr18	51326979	51328186		chr10	69393049	69393827		chr16	56124002	56124582		chr11	109683626	109684022		chrX	101175999	101177367		chr2	93986082	93986647		chr6	54655300	54655703
chr2	106492786	106494365		chr18	54651417	54652352		chr10	69750440	69751236		chr16	57391436	57392073		chr11	109713302	109713666		chrX	119944611	119945556		chr2	98502329	98503314		chr6	55432408	55432858
chr2	107468581	107469185		chr18	55112444	55113364		chr10	70521256	70522270		chr16	59591941	59592409		chr11	109784389	109784804		chrX	123312261	123312461		chr2	98503642	98504376		chr6	67100819	67101158
chr2	112433443	112434291		chr18	55114950	55115688		chr10	70655320	70656720		chr16	77029645	77030297		chr11	109921433	109921904		chrX	133275434	133277109		chr2	98504985	98505549		chr6	81970033	81970358
chr2	112435099	112435951		chr18	56552140	56552934		chr10	70714455	70715056		chr16	77394222	77394857		chr11	110039421	110039866		chrX	141086860	141087039		chr2	98506223	98507658		chr6	88435281	88435718
chr2	114613784	114614420		chr18	57174206	57174828		chr10	70715077	70715674		chr16	77551208	77551784		chr11	110359994	110360425		chrX	147451014	147452023		chr2	102884079	102884990		chr6	88452985	88453673
chr2	115821837	115822455		chr18	58818584	58819363		chr10	70807151	70808426		chr16	84746131	84746737		chr11	111101000	111101433		chrX	147778068	147779807		chr2	103044960	103045614		chr6	88667480	88667844
chr2	116843882	116845307		chr18	60375511	60376183		chr10	70810105	70811154		chr16	87524245	87524898		chr11	111117355	111117724		chrX	151696558	151697582		chr2	107465786	107466122		chr6	88897893	88898328
chr2	116954726	116955413		chr18	60598445	60599298		chr10	72127404	72128189		chr16	88631642	88632230		chr11	111307094	111307384		chrX	155970163	155971085		chr2	107804821	107805478		chr6	90568986	90569579
chr2	124937480	124938522		chr18	60792126	60792986		chr10	74583478	74584225		chr16	93324943	93325619		chr11	111831895	111832856		chrX	157432173	157433095		chr2	109524035	109524409		chr6	90573975	90574572
chr2	126757036	126758175		chr18	61864199	61864982		chr10	74869092	74871109		chr16	93354056	93354775		chr11	111857444	111857727		chrX	160346126	160347539		chr2	116729810	116730260		chr6	90676871	90677366
chr2	131693493	131694146		chr18	62170113	62170808		chr10	74891045	74892637		chr16	93745149	93745588		chr11	111900026	111900510		chrX	160513903	160514931		chr2	122138518	122138733		chr6	94053504	94053942
chr2	131694254	131695334		chr18	65158787	65159630		chr10	74962772	74963771		chr16	93822837	93823584		chr11	112268989	112269373		chrX	162947549	162948823		chr2	125984931	125985401		chr6	99049765	99050147
chr2	133321517	133322450		chr18	65196333	65197368		chr10	74963977	74965019		chr16	94730312	94730976		chr11	113008895	113009242		chrX	165111215	165112768		chr2	135681312	135681892		chr6	100531946	100532339
chr2	134367371	134368317		chr18	75517387	75518213		chr10	74975193	74976639		chr16	96076755	96077296		chr11	115028131	115028623						chr2	137379212	137380034		chr6	100781756	100782192
chr2	134534296	134534990		chr18	75603549	75605265		chr10	75229335	75230116		chr16	96547682	96548256		chr12	8096673	8096987						chr2	139526314	139526710		chr6	108363585	108363899
chr2	134657796	134658781		chr18	75976972	75978145		chr10	75235143	75236628		chr16	98161460	98162063		chr12	8212521	8212925						chr2	147548526	147548922		chr6	108382802	108383244
chr2	135624501	135625280		chr18	79219243	79220126		chr10	75248168	75249238		chr17	3005071	3005575		chr12	8288433	8288864						chr2	148820763	148821326		chr6	113252316	113252675
chr2	141104305	141105338		chr18	83090272	83091844		chr10	75257426	75258411		chr17	5750226	5750923		chr12	8541668	8542129						chr2	148830484	148830994		chr6	113906606	113907039
chr2	141111167	141112516		chr18	84695832	84696313		chr10	75266706	75267667		chr17	8465714	8466317		chr12	8570073	8570645						chr2	149427739	149428227		chr6	115540466	115540758
chr2	143701580	143703315		chr19	3194069	3194925		chr10	75294807	75295917		chr17	13123467	13123971		chr12	10574495	10575160						chr2	152128510	152129133		chr6	117358011	117358373
chr2	143738831	143739913		chr19	3958336	3959466		chr10	75344005	75345502		chr17	13835043	13835592		chr12	11151622	11152055						chr2	163089150	163089511		chr6	127284107	127284504
chr2	143903632	143904494		chr19	4197220	4198236		chr10	75397555	75399247		chr17	17520440	17521048		chr12	12491603	12491935						chr2	163511474	163511913		chr6	127291449	127292033
chr2	145500718	145502784		chr19	4577116	4577763		chr10	75399457	75400418		chr17	23688913	23689563		chr12	12578117	12578418						chr2	163957121	163957694		chr6	127299553	127299918
chr2	147726035	147726799		chr19	5821695	5822890		chr10	75405393	75406154		chr17	24357897	24358587		chr12	12806840	12807309						chr2	164831862	164832807		chr6	131327398	131327654
chr2	147757218	147758466		chr19	6996240	6997193		chr10	75407027	75407803		chr17	24956230	24956900		chr12	12821409	12821975						chr2	168900717	168901195		chr6	134170497	134170842
chr2	147793706	147795143		chr19	9990217	9991064		chr10	76034758	76035437		chr17	26237137	26237611		chr12	13009152	13010114						chr2	169627640	169628254		chr6	135252456	135252821
chr2	152175336	152176169		chr19	10267925	10268914		chr10	76484858	76486069		chr17	27122270	27123208		chr12	13675323	13675788						chr2	169874274	169874731		chr6	144601415	144601781
chr2	154169124	154170249		chr19	17565493	17566266		chr10	76545100	76546162		chr17	29030877	29031531		chr12	13683757	13684179						chr3	3001726	3002055		chr6	144659234	144659812
chr2	155520730	155522424		chr19	17825743	17826714		chr10	76553342	76555038		chr17	29141783	29142478		chr12	13730935	13731989						chr3	11357378	11357839		chr6	146159804	146160093
chr2	166481054	166481945		chr19	17836863	17839002		chr10	76561073	76562106		chr17	29265669	29266019		chr12	17432494	17432899						chr3	14746024	14746505		chr6	146448625	146449063
chr2	168900404	168901240		chr19	20799930	20800527		chr10	76565685	76567037		chr17	29293674	29294309		chr12	17477108	17477673						chr3	18040067	18040429		chr6	146700080	146700526
chr2	169539519	169540387		chr19	23112402	23113453		chr10	76578848	76580009		chr17	30797586	30798281		chr12	21487472	21487861						chr3	18150958	18151520		chr7	14269653	14269935
chr2	172968258	172970178		chr19	29477094	29478418		chr10	76580547	76581786		chr17	30799000	30799555		chr12	21501346	21501804						chr3	18195964	18196477		chr7	14336726	14337054
chr3	11357198	11358112		chr19	29562804	29563720		chr10	76609278	76610355		chr17	30799829	30800790		chr12	25696513	25696843						chr3	18198616	18199131		chr7	14372280	14372644
chr3	14778931	14779810		chr19	30237115	30237957		chr10	76971984	76973443		chr17	31432216	31432989		chr12	25861438	25861814						chr3	18328771	18329332		chr7	14398719	14400197
chr3	18109415	18110535		chr19	30303518	30304826		chr10	76980399	76981070		chr17	31460260	31460792		chr12	26102149	26102542						chr3	18360140	18360860		chr7	14402971	14403252
chr3	18144865	18147380		chr19	30323291	30323709		chr10	77050492	77051312		chr17	31582429	31582988		chr12	26499144	26499877						chr3	18361119	18361463		chr7	14708018	14708721
chr3	18150564	18151711		chr19	32265585	32266321		chr10	77072729	77073525		chr17	32638733	32639267		chr12	27045974	27046400						chr3	19160952	19161514		chr7	14716474	14717259
chr3	18153991	18155544		chr19	32446660	32447527		chr10	77075862	77076902		chr17	35112612	35113260		chr12	27072385	27072709						chr3	21546279	21546695		chr7	14788804	14789101
chr3	18198125	18199936		chr19	32725364	32726219		chr10	77362497	77365298		chr17	36326085	36326809		chr12	28722572	28723085						chr3	23638919	23639613		chr7	14824717	14825063
chr3	18242935	18243787		chr19	34573094	34574002		chr10	78070247	78070957		chr17	43447051	43447600		chr12	28723091	28723695						chr3	23864251	23864615		chr7	14892762	14893572
chr3	18328284	18329507		chr19	34923641	34924365		chr10	79131269	79132083		chr17	43998069	43998578		chr12	28775495	28775930						chr3	24406696	24407077		chr7	14893827	14894698
chr3	18523574	18526046		chr19	35225043	35225691		chr10	79157815	79159329		chr17	45936540	45937218		chr12	29760060	29760509						chr3	24916539	24917078		chr7	20299540	20299865
chr3	18783942	18784534		chr19	38316762	38317449		chr10	79390874	79391490		chr17	46135262	46135950		chr12	29763810	29764200						chr3	42691360	42691900		chr7	25184224	25184968
chr3	24443827	24444553		chr19	42165266	42166258		chr10	79396779	79397591		chr17	46136356	46136867		chr12	31026600	31027341						chr3	47213990	47214478		chr7	27093582	27094443
chr3	27213173	27213902		chr19	42675855	42676836		chr10	79399233	79401068		chr17	47383500	47384243		chr12	31032959	31033396						chr3	51551424	51551815		chr7	27622037	27622626
chr3	27778868	27779761		chr19	43597951	43601253		chr10	79533462	79535333		chr17	47609618	47610644		chr12	31054025	31054495						chr3	52340999	52341649		chr7	27635779	27636235
chr3	28580533	28581522		chr19	44468027	44469289		chr10	79556228	79558351		chr17	49421971	49422566		chr12	31979326	31979770						chr3	54325736	54327065		chr7	29626457	29626867
chr3	32461347	32462857		chr19	44617003	44617926		chr10	79603730	79606112		chr17	49561919	49562865		chr12	32095655	32096071						chr3	55817882	55818207		chr7	31037442	31037693
chr3	33927095	33927792		chr19	47035850	47036589		chr10	79627533	79628351		chr17	53792856	53793441		chr12	33218567	33218903						chr3	57104072	57104650		chr7	59168722	59169110
chr3	37787062	37788271		chr19	47411568	47412962		chr10	79732726	79734466		chr17	56167246	56167872		chr12	33393968	33394395						chr3	60896670	60897103		chr7	71080047	71080510
chr3	38258714	38259771		chr19	47546778	47547770		chr10	79798018	79801520		chr17	56751524	56752434		chr12	33604040	33604360						chr3	66169209	66169825		chr7	74149160	74149646
chr3	43858509	43859414		chr19	48123680	48124168		chr10	79814042	79815211		chr17	64555395	64555955		chr12	33725603	33726081						chr3	66380481	66380996		chr7	75869576	75869978
chr3	51810241	51811670		chr19	48780848	48781948		chr10	79966209	79966937		chr17	64666043	64666659		chr12	35405802	35406132						chr3	66392008	66392445		chr7	77771767	77771975
chr3	54321020	54321700		chr19	55306308	55307344		chr10	80126376	80128693		chr17	64959226	64959951		chr12	37397541	37397970						chr3	68066161	68066734		chr7	86048462	86048817
chr3	54561273	54562396		chr19	55866869	55867958		chr10	80136586	80137665		chr17	65030787	65031697		chr12	37672441	37672859						chr3	68081963	68082265		chr7	87346809	87347197
chr3	58258068	58258917		chr19	55990482	55991390		chr10	80138463	80141499		chr17	67207874	67208472		chr12	38029376	38029703						chr3	72969751	72970071		chr7	88343938	88344415
chr3	60412639	60413417		chr19	56754179	56755034		chr10	80220094	80221091		chr17	67508613	67509549		chr12	38129154	38129534						chr3	77748735	77749043		chr7	89881218	89881560
chr3	60900494	60901264		chr2	5433471	5434375		chr10	80228624	80229973		chr17	68661873	68662676		chr12	40658053	40658462						chr3	79531036	79531473		chr7	91871066	91871411
chr3	63617835	63618704		chr2	5987999	5989345		chr10	80282040	80282900		chr17	70171210	70171766		chr12	40679436	40679953						chr3	82631682	82632123		chr7	96546764	96547047
chr3	64224142	64224780		chr2	6249743	6250518		chr10	80288645	80289532		chr17	74998275	74998807		chr12	40719432	40719855						chr3	91285627	91286156		chr7	97293892	97294231
chr3	67358781	67359723		chr2	20489969	20490688		chr10	80380654	80381465		chr17	79427843	79429056		chr12	41202187	41202555						chr3	91287205	91287893		chr7	97426176	97426438
chr3	67362085	67363127		chr2	22443901	22446270		chr10	80391267	80393126		chr17	80058098	80058701		chr12	41581322	41581889						chr3	98481666	98482216		chr7	99909232	99909562
chr3	67470832	67471645		chr2	24166883	24167691		chr10	80420357	80421259		chr17	83966379	83967235		chr12	41599844	41600166						chr3	98491546	98492120		chr7	103944956	103945293
chr3	67475668	67476384		chr2	24199923	24201173		chr10	80421531	80422503		chr17	85443765	85444214		chr12	42143692	42144047						chr3	98590431	98591070		chr7	109225287	109225489
chr3	67480511	67481841		chr2	26394726	26395688		chr10	80422983	80423871		chr17	85451528	85452529		chr12	44375168	44375609						chr3	101991297	101991757		chr7	114769376	114769802
chr3	75591456	75592353		chr2	28388320	28389186		chr10	80424597	80425970		chr17	85694198	85694767		chr12	45008126	45008572						chr3	109681768	109682332		chr7	119917142	119917599
chr3	76440761	76441400		chr2	28473795	28474949		chr10	80499640	80500632		chr17	86327676	86328329		chr12	46024302	46024585						chr3	116774764	116775147		chr7	122942091	122942484
chr3	77613815	77614697		chr2	28485320	28486397		chr10	80544344	80547945		chr17	86594010	86594574		chr12	46097853	46098289						chr3	117999382	117999798		chr7	123513843	123514142
chr3	78938263	78939085		chr2	28505855	28506530		chr10	80638464	80642774		chr17	86601247	86601855		chr12	48470387	48470670						chr3	118711574	118711972		chr7	125954916	125955410
chr3	78953966	78954722		chr2	30097811	30098859		chr10	80644687	80646241		chr17	92274519	92275217		chr12	48507039	48507467						chr3	119668117	119668627		chr7	126990767	126991354
chr3	79430159	79430638		chr2	31035284	31036230		chr10	80654696	80656522		chr18	3382605	3383205		chr12	48514273	48514653						chr3	121349227	121350176		chr7	127009646	127010069
chr3	80740638	80741556		chr2	31921308	31922104		chr10	80873727	80875535		chr18	3420656	3421233		chr12	51167489	51167781						chr3	121543267	121543820		chr7	128861882	128862198
chr3	81463408	81463967		chr2	32007222	32008081		chr10	80876390	80877390		chr18	5141304	5141918		chr12	52374500	52374889						chr3	122507916	122508928		chr7	130241369	130241928
chr3	81799137	81800402		chr2	33079711	33080548		chr10	80892105	80893435		chr18	6136115	6136726		chr12	52712683	52713941						chr3	122574179	122574968		chr7	134429573	134429981
chr3	82093823	82095299		chr2	35948137	35949087		chr10	81095974	81096926		chr18	7618629	7619191		chr12	53674392	53674743						chr3	125363989	125364481		chr7	137217298	137217816
chr3	86252678	86253326		chr2	37213858	37215139		chr10	82217197	82218667		chr18	9796296	9796824		chr12	55479657	55479980						chr3	127029246	127029804		chr7	141335850	141336172
chr3	95918596	95919372		chr2	44895989	44896630		chr10	82240477	82241436		chr18	10886140	10886654		chr12	55483000	55483472						chr3	129917327	129918023		chr7	143597329	143597609
chr3	96377673	96378725		chr2	52753711	52754759		chr10	82253026	82254078		chr18	12234228	12235078		chr12	57874969	57875301						chr3	130112381	130112897		chr7	144413230	144413743
chr3	98115593	98117129		chr2	52776854	52777533		chr10	82269123	82269685		chr18	12858417	12859269		chr12	58033938	58034382						chr3	135322475	135322670		chr7	146723707	146724058
chr3	98449855	98450976		chr2	56975320	56976302		chr10	84220006	84220917		chr18	16836400	16837125		chr12	58547961	58548619						chr3	141854441	141855019		chr7	147186996	147187356
chr3	98490974	98492285		chr2	58996141	58996929		chr10	84272650	84273735		chr18	20217270	20217860		chr12	58971944	58972511						chr3	149209115	149209749		chr7	149331958	149332223
chr3	98555554	98556818		chr2	59124129	59125014		chr10	84273847	84274622		chr18	20759829	20760346		chr12	59023031	59023480						chr3	149508978	149509512		chr7	149794876	149795136
chr3	104377204	104378090		chr2	59466078	59467076		chr10	84646035	84647642		chr18	21429358	21430024		chr12	60057152	60057477						chr3	149573644	149574120		chr7	150362421	150362888
chr3	104414312	104414851		chr2	65390185	65392030		chr10	85484305	85485253		chr18	38939292	38940029		chr12	70812155	70812448						chr3	149583182	149583865		chr7	150641505	150641899
chr3	104426565	104427388		chr2	67719401	67720570		chr10	86166308	86169769		chr18	44715320	44715936		chr12	70814573	70814963						chr3	153592446	153593052		chr7	152255161	152255542
chr3	104427438	104428383		chr2	68856955	68857711		chr10	86246062	86246888		chr18	45736424	45737050		chr12	71324307	71324722						chr3	155446987	155447333		chr8	3754348	3754791
chr3	106330543	106331555		chr2	68885863	68886802		chr10	86495283	86496076		chr18	46614678	46615276		chr12	71814554	71815165						chr4	3016579	3018449		chr8	8652483	8652811
chr3	107769364	107770104		chr2	75447538	75448305		chr10	86791928	86793218		chr18	46789845	46790406		chr12	72093116	72093396						chr4	4473873	4474258		chr8	11084722	11085916
chr3	107829270	107830224		chr2	78239164	78239912		chr10	86797549	86799133		chr18	53531455	53532112		chr12	74417430	74417828						chr4	7123623	7124283		chr8	11632532	11633403
chr3	112076625	112077501		chr2	84724335	84725089		chr10	86982535	86983684		chr18	54412652	54413274		chr12	74502654	74503109						chr4	10386827	10387133		chr8	12760113	12760359
chr3	112547924	112548776		chr2	84836144	84837309		chr10	87034341	87036026		chr18	55007995	55008330		chr12	74582085	74582557						chr4	16519506	16519910		chr8	13529794	13530272
chr3	114133807	114134494		chr2	84902879	84903727		chr10	87173308	87175067		chr18	56610091	56610599		chr12	74956689	74957070						chr4	22134996	22135367		chr8	13538914	13539386
chr3	116501252	116503859		chr2	90507951	90508659		chr10	87180930	87182013		chr18	57839341	57839988		chr12	76767864	76768329						chr4	25208712	25209300		chr8	15151484	15151779
chr3	116637246	116638121		chr2	91316114	91317210		chr10	87182583	87183372		chr18	59238703	59239255		chr12	76784582	76784977						chr4	28628781	28629233		chr8	17664849	17665276
chr3	118179336	118181842		chr2	92190593	92191652		chr10	87377452	87379266		chr18	59249881	59250363		chr12	77532347	77532938						chr4	41167929	41168104		chr8	32384652	32385230
chr3	118486664	118487678		chr2	93880845	93881439		chr10	87767005	87767715		chr18	60380434	60380931		chr12	78450511	78450918						chr4	42295499	42295949		chr8	46644756	46645115
chr3	121386861	121388750		chr2	93882589	93883304		chr10	87970290	87971052		chr18	61581392	61581852		chr12	79350184	79350601						chr4	46965192	46966610		chr8	49387850	49388128
chr3	121736763	121737638		chr2	101805555	101806811		chr10	88560632	88561573		chr18	62389446	62390115		chr12	79385182	79385503						chr4	48417668	48417911		chr8	67229656	67230105
chr3	121913192	121914733		chr2	101832419	101833373		chr10	88994600	88995601		chr18	62391545	62392093		chr12	79869974	79870317						chr4	48549153	48549468		chr8	70467889	70468198
chr3	122425006	122425886		chr2	103472120	103472945		chr10	88995640	88996908		chr18	64112207	64112712		chr12	80504883	80505372						chr4	55079324	55079827		chr8	72676395	72676758
chr3	126806527	126807215		chr2	108604550	108605653		chr10	89027803	89029369		chr18	64166235	64167095		chr12	80626874	80627192						chr4	59976711	59976888		chr8	84889779	84890144
chr3	129294181	129295396		chr2	109809278	109810073		chr10	89095463	89097022		chr18	64503787	64504376		chr12	80699482	80699889						chr4	61819459	61819974		chr8	87959537	87959873
chr3	129916973	129918341		chr2	114479752	114480943		chr10	89210827	89212119		chr18	64505250	64506029		chr12	80784375	80784711						chr4	62762963	62763411		chr8	91349852	91350355
chr3	131039640	131040228		chr2	116852124	116853461		chr10	91608759	91609608		chr18	64508376	64509293		chr12	82611870	82612220						chr4	64158707	64159169		chr8	91390029	91390440
chr3	132228579	132229490		chr2	118305345	118306090		chr10	92950211	92952897		chr18	64509690	64510868		chr12	83434163	83434469						chr4	65591926	65592386		chr8	91403753	91404215
chr3	132306439	132307771		chr2	118872093	118872871		chr10	92987664	92989089		chr18	64787872	64788584		chr12	83708756	83709202						chr4	66544191	66544801		chr8	91446827	91447139
chr3	133010739	133011577		chr2	127347487	127348336		chr10	93610106	93612327		chr18	67882820	67883343		chr12	84015145	84015514						chr4	66765135	66765510		chr8	91647657	91648108
chr3	133402956	133404159		chr2	128919900	128920864		chr10	93645194	93645955		chr18	68165453	68166037		chr12	84015612	84016034						chr4	66882628	66882885		chr8	92039887	92040255
chr3	133426565	133428155		chr2	130274449	130275536		chr10	94462222	94462724		chr18	68458351	68459335		chr12	84016819	84017235						chr4	68491491	68491955		chr8	93403875	93404263
chr3	138039757	138041873		chr2	130750542	130751436		chr10	94605169	94606543		chr18	74004028	74004835		chr12	86350660	86351069						chr4	68583954	68584369		chr8	93909456	93910099
chr3	143776717	143777584		chr2	131047626	131048470		chr10	94608779	94610755		chr18	74927369	74928147		chr12	87579791	87580153						chr4	70038987	70039462		chr8	94075029	94075394
chr3	144240194	144241590		chr2	131222869	131223593		chr10	94614908	94615897		chr18	78058991	78059753		chr12	87854772	87855188						chr4	71332282	71332729		chr8	94238534	94239075
chr3	146431382	146432273		chr2	131277685	131278539		chr10	94681094	94681972		chr18	81428456	81429155		chr12	91056646	91056986						chr4	73202955	73203222		chr8	94796600	94796996
chr3	148342679	148344663		chr2	131560155	131561181		chr10	94716863	94717792		chr18	84249490	84250054		chr12	92931402	92931954						chr4	73258971	73259515		chr8	95535327	95535792
chr3	148345947	148346757		chr2	132749177	132750050		chr10	94726704	94728054		chr18	84253779	84254502		chr12	96100929	96101242						chr4	73845338	73845813		chr8	95567058	95567378
chr3	149582892	149583941		chr2	136778490	136779282		chr10	94766525	94767941		chr18	84795722	84796216		chr12	99740229	99740483						chr4	73847318	73847777		chr8	108555049	108555473
chr3	149597698	149598512		chr2	136781425	136782608		chr10	94780583	94781538		chr18	85079175	85079924		chr12	100633227	100633694						chr4	81376159	81376822		chr8	108841095	108841339
chr3	156457001	156457787		chr2	140253072	140253444		chr10	94784526	94785749		chr19	3832973	3833801		chr12	100634713	100635380						chr4	81435091	81435613		chr8	118364390	118364796
chr4	3335133	3335939		chr2	140528845	140529455		chr10	94877924	94881054		chr19	4068873	4069455		chr12	100737635	100737946						chr4	83215784	83216153		chr8	118549789	118550176
chr4	10385904	10387259		chr2	145419310	145420056		chr10	94881071	94881749		chr19	4545715	4546331		chr12	100740423	100740830						chr4	84077389	84077980		chr8	119028666	119029103
chr4	14951164	14951796		chr2	145654186	145654990		chr10	94888605	94890378		chr19	5366939	5367467		chr12	102304517	102304982						chr4	84078031	84078486		chr8	119032621	119033071
chr4	16865222	16865797		chr2	145655887	145656851		chr10	95087629	95088849		chr19	5909059	5909393		chr12	103281961	103282433						chr4	87172877	87173222		chr8	119063940	119064381
chr4	32385612	32386835		chr2	145661207	145662259		chr10	95119242	95120039		chr19	10178536	10179290		chr12	103535011	103535583						chr4	90811293	90811807		chr8	119133573	119134080
chr4	35479956	35480470		chr2	145676076	145676953		chr10	95122196	95122977		chr19	10196692	10197253		chr12	104781567	104781933						chr4	91164788	91165208		chr8	119190704	119191164
chr4	35710043	35710891		chr2	152554563	152555380		chr10	95142823	95144369		chr19	10223660	10224327		chr12	104788151	104788551						chr4	96674284	96674748		chr8	124914715	124915135
chr4	36035897	36036732		chr2	153422822	153424021		chr10	95235639	95236936		chr19	11629129	11629896		chr12	104836667	104836954						chr4	102407443	102407849		chr8	124987458	124988145
chr4	44989943	44991537		chr2	153425695	153427388		chr10	95239472	95240268		chr19	12713042	12713699		chr12	104918039	104918461						chr4	103058391	103059647		chr8	125467295	125467677
chr4	45535452	45537394		chr2	153481933	153483026		chr10	95412655	95413450		chr19	12845936	12846769		chr12	105204990	105205357						chr4	103077927	103078234		chr8	126726765	126727209
chr4	47378578	47379954		chr2	153541140	153541698		chr10	95588220	95588937		chr19	14577934	14578557		chr12	105984679	105985103						chr4	105328651	105329115		chr8	127184265	127184657
chr4	48258164	48258979		chr2	154896221	154897244		chr10	95650601	95651900		chr19	16441693	16442202		chr12	107063634	107064033						chr4	107749388	107750685		chr8	129499637	129500007
chr4	52828330	52829358		chr2	154909991	154910947		chr10	96115491	96116255		chr19	16510126	16510737		chr12	107716544	107717076						chr4	109515185	109515633		chr8	130633103	130633483
chr4	53214552	53215245		chr2	155005361	155006366		chr10	96116669	96117317		chr19	17894787	17895441		chr12	109510976	109511583						chr4	114794143	114794692		chr9	8078904	8079229
chr4	53217051	53217939		chr2	156960564	156961609		chr10	96205531	96206334		chr19	18203046	18203642		chr12	111133550	111133940						chr4	119061708	119062028		chr9	9166045	9166330
chr4	53249131	53249977		chr2	163057129	163057880		chr10	98301283	98302090		chr19	21029200	21029761		chr12	111262331	111263083						chr4	123705269	123705839		chr9	14088881	14089247
chr4	57126118	57128450		chr2	163629547	163630239		chr10	98617148	98617891		chr19	21546762	21547411		chr12	111301143	111301655						chr4	127142758	127143248		chr9	14092022	14092368
chr4	57126118	57129614		chr2	165214603	165215630		chr10	98664771	98665420		chr19	21555520	21556091		chr12	112352743	112353302						chr4	127902085	127902438		chr9	21406397	21406818
chr4	57126144	57129614		chr2	165293174	165294100		chr10	98669795	98670881		chr19	23135420	23136221		chr12	113080853	113081106						chr4	128451754	128452245		chr9	22961712	22962060
chr4	61724497	61725441		chr2	165644956	165645532		chr10	98673980	98675535		chr19	23143001	23143750		chr12	115213160	115213551						chr4	129767821	129768225		chr9	23112205	23112747
chr4	62912409	62913697		chr2	166649494	166650546		chr10	98689045	98689901		chr19	23363563	23364121		chr12	116491450	116491886						chr4	130597093	130597685		chr9	23215039	23215381
chr4	63405366	63406306		chr2	167142069	167142786		chr10	98691755	98692619		chr19	29573148	29573766		chr12	118282619	118282981						chr4	134452551	134453703		chr9	24971987	24972250
chr4	66785577	66786404		chr2	167480152	167481110		chr10	98732751	98734434		chr19	30090575	30091229		chr12	119096384	119096750						chr4	136007545	136008520		chr9	24999920	25000150
chr4	70187415	70188054		chr2	167484952	167485810		chr10	98819636	98820789		chr19	30113571	30113999		chr12	119144002	119144278						chr4	137710004	137710205		chr9	27610006	27610270
chr4	72606462	72608267		chr2	173371727	173372323		chr10	98847119	98847997		chr19	31945797	31946358		chr12	119800674	119801054						chr4	139486804	139487184		chr9	29265906	29266134
chr4	80957583	80959034		chr2	177283868	177284340		chr10	99017490	99019275		chr19	32601380	32602030		chr12	120020492	120020886						chr4	145634618	145636512		chr9	31073600	31073967
chr4	81376109	81377021		chr2	178328709	178329668		chr10	99143546	99144391		chr19	32606540	32607331		chr13	3251721	3252045						chr4	145716960	145717508		chr9	34903368	34903693
chr4	82116595	82117454		chr3	8778577	8779537		chr10	105278099	105278881		chr19	33153311	33154026		chr13	3645181	3645617						chr4	145912754	145913322		chr9	36671273	36671733
chr4	88543747	88544530		chr3	9249624	9250302		chr10	106477420	106478328		chr19	34570712	34571382		chr13	4047834	4048455						chr4	146189121	146189448		chr9	40130822	40131178
chr4	92042286	92043618		chr3	9579922	9580512		chr10	106762350	106763512		chr19	34818380	34819199		chr13	4278508	4278923						chr4	146458086	146458833		chr9	41995881	41996398
chr4	96330330	96331268		chr3	10091543	10092631		chr10	106790209	106791063		chr19	34831151	34831939		chr13	4403590	4404391						chr4	149726092	149726511		chr9	42535699	42536118
chr4	96667931	96668957		chr3	14897548	14898518		chr10	107504454	107505271		chr19	36529806	36530493		chr13	5228690	5228997						chr4	152115689	152116440		chr9	43537504	43537791
chr4	97627116	97628638		chr3	27417623	27418520		chr10	107635844	107636697		chr19	36599507	36599878		chr13	5586408	5586840						chr4	152173519	152173994		chr9	46250442	46250801
chr4	102458833	102459555		chr3	27603530	27604448		chr10	107885408	107886173		chr19	36709083	36709799		chr13	6329908	6330295						chr5	3372990	3373383		chr9	56797407	56798018
chr4	103067700	103068927		chr3	28356327	28357209		chr10	107890337	107891126		chr19	37516607	37517746		chr13	7312650	7313098						chr5	3576091	3576439		chr9	64548488	64548852
chr4	104056948	104058505		chr3	30165375	30166298		chr10	108147469	108148218		chr19	37532336	37532941		chr13	7428571	7428877						chr5	8064219	8064634		chr9	68868244	68868642
chr4	104056948	104058508		chr3	31006323	31007252		chr10	109275452	109276191		chr19	37657804	37658491		chr13	8697740	8698190						chr5	13844220	13844705		chr9	72685483	72685752
chr4	104440504	104441469		chr3	35978406	35979737		chr10	110766276	110767112		chr19	39538411	39538961		chr13	9013760	9014232						chr5	14025129	14025571		chr9	72939558	72939990
chr4	104442691	104443259		chr3	55051896	55052906		chr10	110772727	110773713		chr19	39626788	39627440		chr13	9939436	9939843						chr5	14994309	14996599		chr9	74497827	74498163
chr4	107738653	107741833		chr3	58883099	58883860		chr10	110941293	110948297		chr19	39815324	39815869		chr13	9958840	9958933						chr5	19826756	19827145		chr9	77869938	77870388
chr4	107762519	107764068		chr3	65421169	65421908		chr10	110952816	110953717		chr19	40063910	40064413		chr13	10441343	10441786						chr5	21402415	21402903		chr9	83167198	83167568
chr4	107796074	107797230		chr3	66095937	66096777		chr10	111045083	111046445		chr19	40148084	40148816		chr13	16361532	16362058						chr5	27577880	27578320		chr9	86573906	86574353
chr4	107802867	107804145		chr3	69127691	69128603		chr10	111256744	111257669		chr19	40162858	40163495		chr13	16371866	16372176						chr5	31712254	31712757		chr9	88168903	88169321
chr4	107804289	107805365		chr3	79648892	79649947		chr10	111271918	111272450		chr19	40163786	40164502		chr13	16553505	16553914						chr5	37051850	37052872		chr9	88225138	88225619
chr4	108780415	108781085		chr3	80953340	80954242		chr10	112390964	112391801		chr19	40260711	40261282		chr13	16863650	16864023						chr5	38700218	38700429		chr9	92027329	92027674
chr4	115273812	115275050		chr3	83835018	83835684		chr10	112410094	112411228		chr19	40371900	40372474		chr13	19231771	19232063						chr5	41133097	41133642		chr9	98322293	98322729
chr4	122696148	122696825		chr3	83984781	83985698		chr10	114749554	114750375		chr19	41175785	41176285		chr13	20602865	20603312						chr5	43289968	43290467		chr9	102561291	102562005
chr4	122703685	122704833		chr3	84039207	84040036		chr10	114773881	114775053		chr19	41349856	41350628		chr13	20604234	20604686						chr5	44232851	44233226		chr9	103578663	103578979
chr4	123134803	123135917		chr3	84101992	84102819		chr10	114786266	114787315		chr19	41913227	41913959		chr13	20752926	20753436						chr5	45502111	45502374		chr9	104233636	104234130
chr4	128868474	128869529		chr3	85666408	85667391		chr10	114795154	114796822		chr19	42579460	42579873		chr13	20939715	20940090						chr5	47228043	47228591		chr9	106133458	106134684
chr4	129002074	129004001		chr3	93375860	93376726		chr10	116518811	116519537		chr19	42796896	42797532		chr13	23444648	23445063						chr5	47247438	47247906		chr9	108930108	108930535
chr4	129511672	129512429		chr3	94231721	94232515		chr10	116848669	116850140		chr19	43887861	43888301		chr13	23761840	23762141						chr5	49760293	49760671		chr9	114530305	114530614
chr4	130272041	130273273		chr3	94779143	94779828		chr10	117154492	117155245		chr19	44118459	44118951		chr13	23898364	23898939						chr5	57300810	57301185		chr9	115203084	115203412
chr4	133269908	133271364		chr3	98211011	98211575		chr10	117229555	117230482		chr19	47376520	47377197		chr13	24235870	24236399						chr5	62428636	62429146		chr9	115390013	115390508
chr4	134455642	134456230		chr3	98653848	98655597		chr10	117265434	117266458		chr19	49608505	49608938		chr13	24444808	24445335						chr5	62696726	62697236		chr9	118093690	118093998
chr4	137756218	137757113		chr3	98657175	98658307		chr10	117485942	117486763		chr19	53607588	53607999		chr13	24638404	24639070						chr5	87153687	87155051		chr9	118861300	118861701
chr4	138494523	138495425		chr3	99968729	99970176		chr10	118158722	118159730		chr19	54021645	54022242		chr13	24649721	24650309						chr5	87367277	87367711		chr9	120802562	120802904
chr4	149351325	149352675		chr3	100282899	100283683		chr10	118186719	118187486		chr19	55223278	55223662		chr13	24870426	24870895						chr5	87509711	87510136		chrX	7788949	7789287
chr4	149707716	149708916		chr3	100291318	100292855		chr10	118189294	118189973		chr19	55478871	55479439		chr13	25022454	25022827						chr5	88055292	88055699		chrX	10674713	10675046
chr4	150131134	150131987		chr3	105542573	105543384		chr10	118198491	118199215		chr19	55544106	55544649		chr13	25069548	25070071						chr5	88631698	88632146		chrX	11021400	11021769
chr4	151637824	151638705		chr3	106368526	106369349		chr10	118699139	118700449		chr19	55624503	55625250		chr13	27008412	27008761						chr5	93612958	93613349		chrX	11305681	11306091
chr4	154746003	154746829		chr3	108606788	108607646		chr10	118934550	118935253		chr19	56452989	56453865		chr13	28088476	28088928						chr5	96438143	96438516		chrX	11529486	11529738
chr5	3490917	3493327		chr3	115478388	115479199		chr10	119364837	119365549		chr19	58470112	58470780		chr13	28200365	28200827						chr5	96875997	96876559		chrX	47944224	47944537
chr5	13844044	13844855		chr3	116617650	116618471		chr10	120787334	120788744		chr19	59441671	59442260		chr13	29080505	29080819						chr5	97229074	97229286		chrX	47953477	47953780
chr5	19230782	19231402		chr3	119071242	119071839		chr10	120930440	120931343		chr19	59482380	59483052		chr13	29195404	29195753						chr5	98415701	98416040		chrX	47956111	47956478
chr5	19825412	19826117		chr3	120987892	120989125		chr10	121059253	121060309		chr2	3558297	3559174		chr13	29300679	29301058						chr5	99420358	99421084		chrX	47958512	47959074
chr5	20095369	20096567		chr3	121049182	121050079		chr10	121745656	121746272		chr2	10052122	10052893		chr13	29744704	29745030						chr5	99691370	99692051		chrX	47965423	47965763
chr5	20562118	20563171		chr3	121196669	121197508		chr10	121952328	121953417		chr2	11253540	11254319		chr13	30438775	30439258						chr5	100020306	100020798		chrX	47968061	47968450
chr5	31135595	31136528		chr3	126676397	126676987		chr10	124597956	124598657		chr2	11284329	11285031		chr13	30452598	30453381						chr5	101737146	101737433		chrX	50070740	50070990
chr5	42840585	42841898		chr3	126827079	126827975		chr10	124722213	124722950		chr2	11368721	11369305		chr13	31073494	31073956						chr5	103622702	103623069		chrX	55359470	55359777
chr5	45501702	45502831		chr3	129145415	129146588		chr10	124761366	124762711		chr2	12820754	12821263		chr13	31632640	31633070						chr5	107613006	107613578		chrX	65931490	65931948
chr5	46294102	46295093		chr3	129153275	129154198		chr10	124765055	124766087		chr2	18015406	18015969		chr13	31860519	31860946						chr5	108940638	108941238		chrX	67718563	67719165
chr5	49451025	49451955		chr3	129197557	129198294		chr10	125366775	125367611		chr2	18024659	18025229		chr13	31868447	31868938						chr5	109899779	109900059		chrX	67906474	67906729
chr5	53593671	53594510		chr3	129229686	129230594		chr10	126128227	126128821		chr2	23898290	23898982		chr13	32646457	32646816						chr5	111064898	111065402		chrX	68698208	68698641
chr5	64862419	64863136		chr3	131142337	131142726		chr10	126519048	126519910		chr2	24681490	24682102		chr13	32646947	32647403						chr5	111869845	111870443		chrX	71031659	71032217
chr5	65822383	65823158		chr3	133180170	133181100		chr10	126596832	126597865		chr2	24746055	24746804		chr13	33061414	33061861						chr5	123115003	123115481		chrX	72983831	72984107
chr5	66475402	66477237		chr3	133193884	133194586		chr10	126604595	126605589		chr2	24749831	24750178		chr13	34025321	34025775						chr5	124310809	124310970		chrX	82922171	82922611
chr5	66485043	66485893		chr3	137953982	137955442		chr10	126790649	126791549		chr2	26254971	26255495		chr13	34314869	34315261						chr5	124732720	124733269		chrX	96735666	96735989
chr5	87153918	87155274		chr3	138009658	138010398		chr10	126850487	126851477		chr2	26458275	26459021		chr13	35689861	35690277						chr5	129579352	129579656		chrX	97978160	97978540
chr5	87457287	87459103		chr3	140295471	140296371		chr10	127013106	127015189		chr2	34003661	34004300		chr13	35815005	35815366						chr5	131334460	131335325		chrX	98374895	98375065
chr5	87762468	87764915		chr3	142156504	142157523		chr10	127041427	127042376		chr2	37544699	37545117		chr13	36715253	36715906						chr5	137032628	137033907		chrX	100522195	100522565
chr5	87801533	87803704		chr3	142222574	142223895		chr10	127048865	127051041		chr2	38679438	38679873		chr13	38607612	38608164						chr5	148036916	148037385		chrX	100670465	100670825
chr5	87883923	87886135		chr3	144288499	144289373		chr10	127111571	127112371		chr2	43325333	43325788		chr13	38827835	38828916						chr5	151345819	151346111		chrX	100672829	100673418
chr5	90633606	90634807		chr3	145453275	145454483		chr10	127175024	127176569		chr2	50252900	50253664		chr13	38831292	38832688						chr5	152150246	152150645		chrX	100742055	100742608
chr5	90842467	90844841		chr3	145626169	145627637		chr10	127185772	127187209		chr2	52278213	52278877		chr13	39380398	39380699						chr6	4069869	4070189		chrX	100848368	100848743
chr5	90885947	90886768		chr3	145710208	145711368		chr10	127191510	127193178		chr2	52431171	52431796		chr13	39382092	39382480						chr6	4800974	4801527		chrX	101012685	101012975
chr5	91075370	91076192		chr3	149074113	149074727		chr10	127200566	127201625		chr2	58319371	58319843		chr13	39503903	39504181						chr6	6407105	6408123		chrX	101489010	101489285
chr5	93201831	93203433		chr3	151864559	151864997		chr10	127237731	127238559		chr2	58387166	58387971		chr13	40413201	40413477						chr6	8366829	8367498		chrX	105732296	105732653
chr5	96735311	96736290		chr3	157387318	157388112		chr10	127258807	127259411		chr2	59071251	59071826		chr13	40645691	40646093						chr6	8408551	8409137		chrX	119510756	119511248
chr5	98263024	98264351		chr4	6292311	6292879		chr10	127301724	127302557		chr2	59829893	59830381		chr13	40663112	40663577						chr6	11871130	11871513		chrX	126244238	126244668
chr5	100019848	100020988		chr4	6782273	6782947		chr10	127323477	127325063		chr2	61135221	61135906		chr13	40936712	40937412						chr6	12950188	12950489		chrX	126938330	126938689
chr5	102439413	102440117		chr4	6835449	6836515		chr10	127330550	127331881		chr2	63699118	63700487		chr13	40977826	40978388						chr6	14711329	14711668		chrX	131625626	131625907
chr5	102864106	102864913		chr4	8614342	8615713		chr10	127373093	127375093		chr2	63863880	63864644		chr13	41016649	41017134						chr6	15843581	15844187		chrX	135597724	135598086
chr5	103071762	103073215		chr4	22424845	22426282		chr10	127399106	127400553		chr2	65025142	65025796		chr13	41100451	41100851						chr6	15879682	15880049		chrX	135647831	135648136
chr5	108850851	108851763		chr4	35862740	35863603		chr10	127403151	127404231		chr2	65163717	65164157		chr13	41180554	41180861						chr6	17201846	17202404		chrX	138770765	138771112
chr5	111924668	111925771		chr4	39581270	39581837		chr10	127439843	127440931		chr2	65175010	65175635		chr13	41316864	41317329						chr6	17269066	17269670		chrX	138902458	138902772
chr5	117535080	117535887		chr4	45508279	45509214		chr10	127441083	127444965		chr2	66043341	66043993		chr13	41940465	41940825						chr6	30515891	30516362		chrX	158408200	158408579
chr5	117743802	117745461		chr4	45512950	45513697		chr10	127495384	127496957		chr2	67809107	67809572		chr13	42463492	42463891						chr6	34103476	34103670
chr5	117743802	117745572		chr4	45631951	45632585		chr10	127498883	127500023		chr2	68974196	68974853		chr13	42465297	42465706						chr6	34612590	34613093
chr5	117743902	117745572		chr4	46876159	46877475		chr10	127519082	127521329		chr2	70661567	70662006		chr13	43992375	43992907						chr6	36627933	36628379
chr5	121034274	121035067		chr4	48173072	48173808		chr10	127657077	127657587		chr2	71444687	71445299		chr13	44062062	44062488						chr6	37701627	37702183
chr5	123589623	123591252		chr4	49447916	49448700		chr10	127690576	127692325		chr2	72010861	72011530		chr13	44086939	44087546						chr6	37919135	37919333
chr5	124402463	124403335		chr4	54917232	54918340		chr10	127772744	127774022		chr2	76995580	76996027		chr13	44389071	44389503						chr6	42977760	42978246
chr5	127045430	127047111		chr4	54966494	54967451		chr10	127939277	127940134		chr2	79809747	79810199		chr13	45999119	45999609						chr6	50255237	50255468
chr5	134514053	134514752		chr4	54970025	54970974		chr10	127985881	127986565		chr2	80140918	80141612		chr13	46013013	46013760						chr6	50684637	50685161
chr5	135102344	135103238		chr4	54973212	54974210		chr10	128020318	128021340		chr2	80342255	80342839		chr13	46393046	46393477						chr6	50722429	50723414
chr5	135582281	135586454		chr4	55779765	55780576		chr10	128024526	128026762		chr2	81110972	81111539		chr13	46508452	46508722						chr6	50753031	50753455
chr5	144531615	144532454		chr4	57931571	57932178		chr10	128035107	128036156		chr2	83673159	83673638		chr13	46790949	46791228						chr6	54191808	54192417
chr5	146785995	146788573		chr4	57939887	57940633		chr10	128184414	128185662		chr2	84561419	84562021		chr13	47183083	47183453						chr6	54722663	54723134
chr5	151581917	151582723		chr4	65209239	65210069		chr10	128227201	128228351		chr2	85910248	85910860		chr13	48289232	48289624						chr6	55139328	55140540
chr6	6406832	6408561		chr4	72712320	72712984		chr10	128332221	128332923		chr2	90235192	90235454		chr13	49575449	49575732						chr6	55837652	55838002
chr6	8379848	8380803		chr4	80560838	80561631		chr10	128359761	128361250		chr2	90329259	90329878		chr13	50154199	50154513						chr6	56559406	56560019
chr6	15842817	15844542		chr4	82445601	82446289		chr10	128375350	128376590		chr2	90359813	90360414		chr13	50851277	50851563						chr6	56782878	56782987
chr6	15879454	15881182		chr4	82974521	82975311		chr10	128392282	128398674		chr2	90688410	90689014		chr13	51323874	51324368						chr6	56869501	56870751
chr6	21931454	21932336		chr4	86195409	86196180		chr10	128401457	128403701		chr2	90994042	90994827		chr13	51992760	51993285						chr6	57719207	57719672
chr6	21975005	21976306		chr4	87527226	87528129		chr10	128407739	128408543		chr2	91375046	91375571		chr13	52867494	52867909						chr6	58683749	58684299
chr6	22464171	22465052		chr4	94827889	94828762		chr11	3023644	3024384		chr2	91622672	91623221		chr13	52945409	52945871						chr6	58690469	58690927
chr6	23593400	23594018		chr4	98588569	98589783		chr11	3358102	3359132		chr2	101849897	101850603		chr13	52997924	52998373						chr6	78311783	78312427
chr6	23595689	23596847		chr4	98724508	98725096		chr11	3831702	3832447		chr2	102220172	102221413		chr13	53089863	53090380						chr6	81399282	81399706
chr6	23609301	23610316		chr4	101413964	101415442		chr11	3930827	3932479		chr2	102884361	102885032		chr13	53411937	53412368						chr6	88333724	88334271
chr6	23996411	23997549		chr4	102522727	102523881		chr11	3934659	3936316		chr2	103315403	103316087		chr13	54622420	54622951						chr6	94877670	94878307
chr6	27773559	27774962		chr4	104851582	104852404		chr11	3953223	3954118		chr2	103686932	103687414		chr13	55835088	55835621						chr6	95768999	95769574
chr6	27775507	27776943		chr4	104980797	104982595		chr11	3994247	3995042		chr2	106493171	106494050		chr13	58857512	58857871						chr6	96486581	96486922
chr6	28421763	28423038		chr4	106218038	106218568		chr11	4010792	4013954		chr2	108596494	108596957		chr13	58862531	58862942						chr6	97821298	97822200
chr6	29463049	29463925		chr4	106664768	106665560		chr11	4774213	4775347		chr2	114613871	114614403		chr13	59021616	59022307						chr6	98540910	98541350
chr6	29782985	29784336		chr4	107025970	107026704		chr11	4780666	4781385		chr2	115275611	115276566		chr13	59061627	59061998						chr6	99103511	99104103
chr6	30515717	30516627		chr4	108072904	108073618		chr11	4782344	4783574		chr2	116954885	116955319		chr13	59105109	59105454						chr6	99221393	99221865
chr6	34421366	34422200		chr4	108876966	108877595		chr11	4794821	4795845		chr2	118144168	118144598		chr13	63791918	63792339						chr6	103598933	103599338
chr6	35808979	35809856		chr4	116380553	116381866		chr11	5196824	5197803		chr2	118336047	118336636		chr13	64058277	64058862						chr6	105709743	105710084
chr6	35813421	35815072		chr4	116511568	116512281		chr11	5351577	5352651		chr2	122614657	122615377		chr13	64224784	64225615						chr6	110818262	110818693
chr6	35824269	35825338		chr4	116976820	116977713		chr11	5369933	5370671		chr2	130825181	130825657		chr13	64503359	64503840						chr6	112887819	112888243
chr6	36254282	36255048		chr4	117511833	117514082		chr11	5385389	5386302		chr2	131470131	131470617		chr13	67505132	67505520						chr6	115368839	115369452
chr6	36264765	36265617		chr4	117705318	117706173		chr11	5398394	5399883		chr2	131582882	131583397		chr13	68329754	68330105						chr6	116724964	116725721
chr6	37701482	37702326		chr4	117965314	117966124		chr11	5405702	5406565		chr2	134369902	134370852		chr13	68765911	68766325						chr6	119619708	119620387
chr6	50716210	50716972		chr4	122631607	122633173		chr11	5409703	5410525		chr2	135122075	135122655		chr13	69141125	69142280						chr6	122842505	122842762
chr6	50986138	50987103		chr4	122909128	122910045		chr11	5608052	5608731		chr2	135139628	135140234		chr13	69721097	69721778						chr6	124459372	124459890
chr6	51957509	51958289		chr4	124423034	124424343		chr11	5639766	5640457		chr2	136887835	136888380		chr13	69763374	69763861						chr6	128612032	128612429
chr6	54711829	54712750		chr4	124494698	124495540		chr11	6446029	6447004		chr2	147030620	147031146		chr13	72477896	72478299						chr6	137581599	137582139
chr6	54713690	54714607		chr4	125618356	125619394		chr11	6525426	6527102		chr2	147354725	147355494		chr13	74833698	74834134						chr6	138215087	138215642
chr6	54799711	54800319		chr4	125724616	125725510		chr11	7005169	7005864		chr2	147549379	147549771		chr13	74900238	74900630						chr6	138404110	138404659
chr6	56733435	56735665		chr4	125879076	125880534		chr11	7051892	7053808		chr2	147769931	147770530		chr13	75051645	75052020						chr6	140693860	140694569
chr6	56869541	56871097		chr4	132075080	132075611		chr11	11828186	11829143		chr2	147787311	147787836		chr13	75765289	75765660						chr6	142616213	142617021
chr6	59020259	59020883		chr4	132584651	132585301		chr11	11860481	11861470		chr2	147806047	147806729		chr13	76114056	76114819						chr6	146713769	146714242
chr6	59405528	59406432		chr4	134061154	134062398		chr11	11861633	11863031		chr2	147849652	147850371		chr13	78263382	78263726						chr6	149116806	149117524
chr6	66907496	66908298		chr4	135205292	135206140		chr11	11865473	11866417		chr2	152189385	152189992		chr13	78359606	78359902						chr7	4378736	4379315
chr6	71146979	71148749		chr4	135211858	135212871		chr11	11873007	11874084		chr2	154439287	154439984		chr13	79185913	79186145						chr7	5042672	5043323
chr6	71149348	71154799		chr4	136677293	136678127		chr11	12152392	12153190		chr2	154986666	154987381		chr13	81350300	81350872						chr7	5400187	5400706
chr6	94032791	94033893		chr4	137082844	137083872		chr11	16601466	16603926		chr2	155521004	155521630		chr13	81455441	81456070						chr7	15031759	15032454
chr6	94173873	94174841		chr4	137197311	137198895		chr11	16671536	16674161		chr2	157947366	157948254		chr13	81468774	81469214						chr7	29430817	29431541
chr6	94500705	94502001		chr4	137881103	137881865		chr11	16709177	16711066		chr2	160907164	160907583		chr13	85386786	85387147						chr7	30386168	30386745
chr6	95947039	95948384		chr4	140744559	140745376		chr11	16749903	16752478		chr2	163365296	163365787		chr13	90069141	90069537						chr7	30527152	30527819
chr6	99103369	99104313		chr4	140880391	140881276		chr11	17551215	17552110		chr2	164258914	164259443		chr13	90231531	90231902						chr7	36522374	36522857
chr6	108760887	108762031		chr4	141069847	141070833		chr11	19819847	19820975		chr2	164831949	164832854		chr13	90614123	90614536						chr7	38755860	38756533
chr6	116297493	116298751		chr4	142488655	142489479		chr11	20042317	20042994		chr2	165722223	165722834		chr13	90938719	90939214						chr7	38967587	38971594
chr6	116846030	116846887		chr4	144204050	144205063		chr11	20247434	20247996		chr2	165763872	165764354		chr13	90980519	90980981						chr7	38985347	38986325
chr6	117010400	117011299		chr4	144631313	144632120		chr11	20270206	20270897		chr2	166071863	166072642		chr13	91905040	91905664						chr7	39172796	39173161
chr6	117117941	117119318		chr4	151196929	151197579		chr11	20295749	20296842		chr2	169373559	169374206		chr13	92094867	92095192						chr7	39220465	39220721
chr6	119619601	119620294		chr4	154402025	154402680		chr11	20353736	20354483		chr2	169460061	169460489		chr13	93509827	93510193						chr7	39335381	39336187
chr6	119630564	119631495		chr4	154494356	154495373		chr11	20354731	20355672		chr2	172968916	172969728		chr13	94109644	94110035						chr7	46452575	46453309
chr6	122544150	122546092		chr4	155316738	155317448		chr11	20361718	20363554		chr2	177276320	177276839		chr13	94481165	94481629						chr7	46458196	46458706
chr6	126994647	126995819		chr5	17368752	17369611		chr11	20761968	20762697		chr2	177297340	177297980		chr13	95052824	95053319						chr7	46594683	46595692
chr6	128611643	128612784		chr5	21149366	21150012		chr11	20901047	20901768		chr2	177302033	177302860		chr13	95168406	95168728						chr7	47133520	47134072
chr6	128612877	128613769		chr5	21164082	21165003		chr11	22094474	22095315		chr2	177308828	177309364		chr13	96657215	96657822						chr7	56190326	56190516
chr6	129154060	129155699		chr5	21178834	21179434		chr11	22186919	22187885		chr2	179025726	179026288		chr13	97729995	97730400						chr7	58124060	58124506
chr6	137422792	137424800		chr5	24466214	24467470		chr11	22872594	22873514		chr2	179776757	179777245		chr13	98763408	98763667						chr7	59689530	59689981
chr6	138023104	138024842		chr5	30836837	30837687		chr11	22890139	22891012		chr3	5212200	5212691		chr13	99463299	99463695						chr7	67974968	67975086
chr6	138028815	138030499		chr5	30928429	30929255		chr11	23592971	23593779		chr3	5218222	5219373		chr13	100436709	100437208						chr7	70465954	70466442
chr6	139825029	139825913		chr5	30930579	30931678		chr11	29512951	29513843		chr3	5860279	5860927		chr13	102548848	102549397						chr7	70824719	70825188
chr6	141471813	141472710		chr5	36657686	36658395		chr11	29662602	29663366		chr3	10285830	10286403		chr13	102646882	102647456						chr7	74844199	74844635
chr6	141910216	141911492		chr5	38351265	38352165		chr11	29708156	29709077		chr3	18525238	18525778		chr13	102700247	102700551						chr7	77660216	77660935
chr6	141948324	141949434		chr5	52190293	52191225		chr11	30669277	30669941		chr3	21831045	21831864		chr13	102738231	102738580						chr7	78408933	78409344
chr6	142616225	142617675		chr5	53469384	53470180		chr11	31670228	31671802		chr3	27533043	27533575		chr13	102750121	102750536						chr7	79490698	79491361
chr6	143192343	143193220		chr5	64355451	64356319		chr11	31703420	31704119		chr3	28596446	28597056		chr13	102767365	102767791						chr7	84931666	84932554
chr6	143433226	143434095		chr5	65089449	65090393		chr11	31724133	31725461		chr3	28603589	28604289		chr13	103646859	103647274						chr7	101681035	101681422
chr6	144843528	144844655		chr5	65272419	65273790		chr11	31761299	31761968		chr3	29021415	29021963		chr13	104283223	104284150						chr7	102633286	102633709
chr6	145539875	145541582		chr5	65754298	65755228		chr11	32452502	32453290		chr3	34382835	34383373		chr13	104922696	104923080						chr7	102890963	102891418
chr6	146691134	146691920		chr5	66526752	66527499		chr11	32596390	32597047		chr3	36381690	36382275		chr13	108456747	108457126						chr7	103384330	103384829
chr6	147592228	147593479		chr5	67004028	67004584		chr11	35326588	35327273		chr3	41296852	41297520		chr13	108631438	108631882						chr7	104717862	104718522
chr6	148264098	148264711		chr5	72796777	72797453		chr11	35596290	35598122		chr3	42691415	42692017		chr13	108762698	108763084						chr7	106172723	106173852
chr6	149081931	149083611		chr5	73039972	73041032		chr11	35728855	35729970		chr3	50962986	50963686		chr13	109238589	109238958						chr7	106183186	106183761
chr6	149085805	149087224		chr5	73269830	73270458		chr11	35733259	35734269		chr3	52655598	52656257		chr13	109273401	109273767						chr7	116030867	116031211
chr6	149087583	149088682		chr5	74646591	74647530		chr11	35776661	35777708		chr3	54564447	54565047		chr13	109326461	109326970						chr7	121222668	121223525
chr6	149135369	149139500		chr5	87332501	87333578		chr11	38494436	38495342		chr3	54918259	54918915		chr13	111433905	111434320						chr7	122354258	122354561
chr6	149141684	149143209		chr5	89317163	89318075		chr11	40507681	40508889		chr3	57190359	57190812		chr13	111486672	111487053						chr7	126774988	126776099
chr6	149163688	149165174		chr5	89355809	89356846		chr11	43580315	43580953		chr3	58386690	58387307		chr13	111502774	111503207						chr7	138598302	138598772
chr6	149170418	149171481		chr5	90859915	90860813		chr11	43821009	43821792		chr3	60663013	60663633		chr13	111525767	111526091						chr7	142235353	142235852
chr6	149171894	149172921		chr5	91575869	91576650		chr11	43986404	43987176		chr3	60896684	60897166		chr13	112085235	112085599						chr8	10872914	10873682
chr6	149173260	149174059		chr5	92514561	92515510		chr11	45014427	45015191		chr3	65769743	65770530		chr13	112086161	112086536						chr8	24205838	24206327
chr6	149281217	149282101		chr5	92759365	92760592		chr11	45701719	45702952		chr3	69453357	69454243		chr13	112116172	112116664						chr8	27704380	27704942
chr6	149292111	149293367		chr5	92792096	92792755		chr11	45886086	45886867		chr3	69457235	69457715		chr13	112321647	112322638						chr8	29377709	29378190
chr7	3147885	3148530		chr5	93470252	93471772		chr11	46512149	46513064		chr3	69583079	69583721		chr13	112709639	112710037						chr8	31188101	31188708
chr7	20158050	20159141		chr5	93633872	93634736		chr11	48604465	48605208		chr3	75567307	75567728		chr13	112782278	112782649						chr8	36236580	36236952
chr7	20425523	20426660		chr5	99668100	99670266		chr11	48626874	48627839		chr3	75591496	75592321		chr13	113813561	113813875						chr8	36431067	36431515
chr7	25259628	25260666		chr5	101324838	101325717		chr11	48671413	48672042		chr3	75592564	75593290		chr13	114209186	114209649						chr8	37439810	37440031
chr7	27844037	27845513		chr5	102912439	102913430		chr11	48899843	48901078		chr3	75756892	75757423		chr13	114308270	114308735						chr8	37775714	37776559
chr7	30033056	30033915		chr5	104020741	104021652		chr11	49835252	49836169		chr3	79391191	79391780		chr13	114320285	114320708						chr8	40002228	40002658
chr7	30386119	30387283		chr5	104165790	104166678		chr11	49989554	49990501		chr3	81230572	81231633		chr13	115281028	115281577						chr8	42558714	42559021
chr7	38977844	38983516		chr5	105491217	105492188		chr11	50007421	50008884		chr3	81779509	81780231		chr13	115370290	115370741						chr8	46629003	46629441
chr7	38984583	38986516		chr5	107712582	107713754		chr11	50049997	50051100		chr3	81799186	81799787		chr13	115444277	115444631						chr8	47461137	47461777
chr7	47135038	47135480		chr5	110860336	110861539		chr11	50105512	50107358		chr3	84038025	84038628		chr13	115643075	115643836						chr8	47606639	47607220
chr7	52711993	52715092		chr5	114597034	114598196		chr11	50455849	50456653		chr3	84089274	84089904		chr13	116385487	116385841						chr8	49825633	49826211
chr7	56077735	56080983		chr5	114611226	114612246		chr11	50527109	50527802		chr3	85777967	85778591		chr13	116964078	116964527						chr8	66231938	66232403
chr7	68453691	68454370		chr5	115243104	115244537		chr11	51408281	51409352		chr3	86252696	86253387		chr13	117566449	117566762						chr8	75541484	75542092
chr7	73073751	73074811		chr5	115244698	115245928		chr11	51470310	51471289		chr3	87347636	87348135		chr13	118255868	118256152						chr8	75578537	75579170
chr7	74494786	74495394		chr5	116468730	116470097		chr11	51569003	51570675		chr3	90312765	90313202		chr14	9076601	9077138						chr8	75647868	75648141
chr7	76844912	76845668		chr5	118128320	118128717		chr11	51581122	51582570		chr3	95156923	95157568		chr14	9116296	9116649						chr8	76320261	76320711
chr7	77124451	77125809		chr5	118553477	118554301		chr11	51668295	51669142		chr3	96397022	96397483		chr14	10420257	10420682						chr8	76462530	76462974
chr7	77661488	77662113		chr5	119472856	119473816		chr11	51672063	51673653		chr3	97931812	97932413		chr14	10453451	10453806						chr8	78591705	78591955
chr7	78342742	78343786		chr5	120588186	120589079		chr11	52037365	52038424		chr3	98391521	98392290		chr14	10809588	10810007						chr8	78881811	78882066
chr7	79135617	79137210		chr5	122322810	122324295		chr11	52215909	52216780		chr3	98433365	98434019		chr14	11346510	11346954						chr8	78898036	78898634
chr7	79467928	79469130		chr5	122448654	122449844		chr11	53512606	53513584		chr3	98672034	98672643		chr14	12262644	12262949						chr8	79037988	79038412
chr7	94519246	94520774		chr5	122450112	122451555		chr11	53575224	53578108		chr3	98692046	98693061		chr14	12442351	12442793						chr8	79064475	79064917
chr7	95458829	95460038		chr5	124315135	124316033		chr11	53582981	53585160		chr3	98961379	98961854		chr14	12448078	12448544						chr8	84786087	84786517
chr7	102861995	102862856		chr5	124667364	124668099		chr11	53590916	53591754		chr3	101758193	101758699		chr14	12485612	12485963						chr8	88678357	88678976
chr7	108890045	108890721		chr5	125606203	125607110		chr11	53602617	53603389		chr3	108102050	108102544		chr14	12532533	12532930						chr8	89551960	89552449
chr7	109332245	109333129		chr5	125654873	125656383		chr11	53609167	53611580		chr3	108113738	108114223		chr14	12591175	12591493						chr8	91930490	91931147
chr7	112702150	112703521		chr5	130681015	130682146		chr11	53696478	53697240		chr3	108116912	108117632		chr14	13166127	13166447						chr8	101478887	101479644
chr7	114077176	114077876		chr5	133021456	133022478		chr11	53702323	53703255		chr3	108139712	108140338		chr14	15361020	15361360						chr8	103379381	103379755
chr7	121056471	121057482		chr5	136133618	136134143		chr11	53724206	53725234		chr3	111924388	111925063		chr14	17312038	17312630						chr8	108530753	108531502
chr7	121078307	121079193		chr5	136382934	136383904		chr11	53820150	53820988		chr3	115315553	115316275		chr14	18560450	18560815						chr8	109276333	109276645
chr7	121104018	121105077		chr5	136992138	136993084		chr11	54841078	54842860		chr3	118194679	118195368		chr14	18580287	18580756						chr8	114919909	114920261
chr7	122073707	122074466		chr5	138094442	138095070		chr11	55281023	55283539		chr3	118711454	118712006		chr14	18671024	18671430						chr8	116604187	116604571
chr7	122827438	122828258		chr5	138594912	138596286		chr11	57769485	57770123		chr3	120877120	120878063		chr14	18712012	18712262						chr8	116614519	116615044
chr7	125844447	125844994		chr5	146339772	146340244		chr11	57775790	57776692		chr3	121495064	121495889		chr14	19553155	19553555						chr8	116678483	116679639
chr7	126664984	126666399		chr5	146353760	146354333		chr11	57786467	57787722		chr3	123218639	123219147		chr14	20946930	20947324						chr8	118168179	118168678
chr7	126669057	126673016		chr5	146358743	146359279		chr11	57794674	57795919		chr3	126826304	126826836		chr14	21764573	21765000						chr8	118697893	118698394
chr7	126701966	126704352		chr5	146402638	146404467		chr11	57812360	57812989		chr3	127029172	127029678		chr14	21812274	21812825						chr8	118807667	118808772
chr7	131703434	131704328		chr5	146525802	146526901		chr11	57834966	57835661		chr3	129276548	129277248		chr14	21924235	21924668						chr8	120117715	120118262
chr7	133812401	133813052		chr5	146539889	146540573		chr11	57915971	57918362		chr3	130317189	130317776		chr14	22436503	22436790						chr8	122933108	122934175
chr7	133824192	133825433		chr5	146548817	146549773		chr11	57996928	57997670		chr3	130387593	130388322		chr14	23333959	23334272						chr8	128480847	128481552
chr7	138592404	138593335		chr5	146611411	146613055		chr11	58028128	58028567		chr3	130390060	130390581		chr14	24348958	24349305						chr8	129816244	129816717
chr7	140311129	140311742		chr5	147035229	147036273		chr11	58114972	58116659		chr3	131154073	131154641		chr14	26058166	26058560						chr9	6786370	6786685
chr7	143683726	143684176		chr5	147503834	147505113		chr11	58136174	58137982		chr3	132228685	132229193		chr14	27671140	27672101						chr9	8682569	8682972
chr7	146674920	146675772		chr5	147882040	147882878		chr11	58751785	58752887		chr3	133385333	133386073		chr14	28124094	28124445						chr9	11676214	11676552
chr7	147934042	147935221		chr5	149862005	149863294		chr11	59043923	59044447		chr3	135170309	135170943		chr14	28142051	28142574						chr9	11782900	11783254
chr7	148528985	148530709		chr6	23639513	23640523		chr11	59236407	59237842		chr3	136535364	136535937		chr14	28164922	28165304						chr9	15198207	15198780
chr7	148979695	148980718		chr6	29609906	29611303		chr11	59707082	59707723		chr3	137792114	137792753		chr14	28461589	28462074						chr9	20536187	20536736
chr7	149847488	149848229		chr6	32345170	32346105		chr11	59841190	59842698		chr3	138037720	138038554		chr14	28495232	28496298						chr9	20594197	20594584
chr8	3270015	3270808		chr6	35287718	35288407		chr11	60011133	60012602		chr3	142412115	142413137		chr14	28604372	28604668						chr9	24346258	24346818
chr8	5030002	5031893		chr6	37562444	37563309		chr11	60020783	60024556		chr3	143949030	143949603		chr14	28978285	28978564						chr9	24670729	24671619
chr8	6006324	6006804		chr6	37567082	37568401		chr11	60033465	60034586		chr3	144240710	144241494		chr14	29212135	29212573						chr9	28953571	28953790
chr8	10012016	10012823		chr6	47073323	47073927		chr11	60165398	60167050		chr3	145425764	145426458		chr14	29452223	29452622						chr9	31161109	31162078
chr8	13036017	13038849		chr6	49059378	49060279		chr11	60542616	60543428		chr3	145575312	145576095		chr14	29588324	29588726						chr9	32672770	32673051
chr8	24118307	24119704		chr6	51629746	51631589		chr11	60544877	60545928		chr3	148768145	148768757		chr14	29920301	29921459						chr9	34976303	34976971
chr8	24315273	24316042		chr6	54762068	54762966		chr11	60608900	60610246		chr3	150028529	150029347		chr14	30515967	30516343						chr9	35112603	35113233
chr8	27459653	27461740		chr6	72047960	72048585		chr11	60621088	60625423		chr3	153592372	153593156		chr14	30531140	30531499						chr9	45199210	45199616
chr8	28369476	28370445		chr6	73214596	73215529		chr11	60637031	60637925		chr3	153610249	153610687		chr14	31835837	31836499						chr9	47217686	47218117
chr8	34751362	34752415		chr6	82698143	82698813		chr11	60911281	60912069		chr4	6841243	6842022		chr14	33540085	33540365						chr9	48151266	48151754
chr8	35761183	35761807		chr6	83405238	83405888		chr11	61049349	61050240		chr4	8172087	8172753		chr14	33702511	33702907						chr9	49944024	49944754
chr8	36151376	36152425		chr6	88562765	88563190		chr11	61076721	61078126		chr4	9009232	9009644		chr14	34187254	34187652						chr9	53096778	53097146
chr8	36579649	36581221		chr6	88945104	88945454		chr11	61890149	61891068		chr4	9159735	9160307		chr14	35967138	35968201						chr9	54501732	54502187
chr8	37704110	37704863		chr6	89163454	89164391		chr11	61893882	61894427		chr4	10789997	10790494		chr14	36498312	36498815						chr9	56021150	56021655
chr8	37727898	37729506		chr6	90721860	90722842		chr11	62308086	62309455		chr4	15140254	15140881		chr14	37510609	37511092						chr9	57063699	57064094
chr8	37775721	37777421		chr6	91061105	91062512		chr11	62352557	62353397		chr4	16125720	16126197		chr14	37784364	37784810						chr9	57632783	57633497
chr8	37783578	37784748		chr6	91474715	91475834		chr11	62363121	62365458		chr4	19501988	19502709		chr14	38698343	38698665						chr9	58369456	58369921
chr8	41355940	41356749		chr6	91478119	91479008		chr11	62456712	62457267		chr4	19852682	19853462		chr14	40061800	40062087						chr9	59965613	59966015
chr8	42558232	42559226		chr6	94966547	94967252		chr11	63675185	63676669		chr4	29215987	29216648		chr14	40078407	40078887						chr9	61116899	61117414
chr8	45458507	45458998		chr6	95129876	95130571		chr11	63731802	63732855		chr4	32332574	32333044		chr14	40849424	40849888						chr9	61889924	61890392
chr8	46341771	46342616		chr6	95891301	95892129		chr11	64400383	64401161		chr4	32333659	32334221		chr14	41222259	41222466						chr9	69683139	69683571
chr8	46817002	46818032		chr6	96011450	96012558		chr11	65619777	65621156		chr4	32375309	32375990		chr14	41867476	41867862						chr9	71464096	71464279
chr8	47447399	47449341		chr6	96066166	96067010		chr11	67778783	67779456		chr4	32694106	32694956		chr14	46035943	46036303						chr9	74648779	74649287
chr8	48003462	48004602		chr6	97359681	97360288		chr11	68639307	68640013		chr4	35173539	35174248		chr14	46092257	46092689						chr9	74831673	74831884
chr8	49728012	49729026		chr6	97455511	97456683		chr11	68653017	68653857		chr4	39503173	39503934		chr14	46097404	46097843						chr9	77878387	77879535
chr8	58709419	58710113		chr6	100531160	100532435		chr11	68688120	68688768		chr4	41691826	41692398		chr14	46897148	46897551						chr9	79872155	79872578
chr8	62228060	62228799		chr6	101200872	101201806		chr11	68781052	68781896		chr4	44990211	44990838		chr14	47283232	47283636						chr9	79913194	79913721
chr8	63013598	63014463		chr6	108202694	108203613		chr11	68886225	68887629		chr4	48345081	48345888		chr14	47344574	47345008						chr9	80048655	80049055
chr8	63486101	63487127		chr6	108256144	108257085		chr11	68907868	68909074		chr4	53295258	53295682		chr14	47500472	47501010						chr9	80104301	80105283
chr8	64660509	64661300		chr6	108376118	108377614		chr11	68909883	68910932		chr4	55617785	55618309		chr14	47579535	47579981						chr9	80112284	80112637
chr8	64663302	64664576		chr6	112988201	112989125		chr11	69177577	69178987		chr4	57071244	57072041		chr14	48094594	48095018						chr9	80565904	80566224
chr8	67367033	67367778		chr6	113626922	113627832		chr11	69228366	69229566		chr4	57127644	57128466		chr14	48418892	48419272						chr9	86307036	86307236
chr8	80575329	80575896		chr6	115374262	115375121		chr11	69230382	69233003		chr4	57311008	57311564		chr14	48531807	48532296						chr9	86311526	86311946
chr8	82812600	82813699		chr6	120140776	120141929		chr11	69360028	69360827		chr4	59343804	59344568		chr14	48606272	48606634						chr9	87634816	87635019
chr8	83528412	83529356		chr6	120994916	120996069		chr11	69459150	69459978		chr4	59344618	59345073		chr14	48678235	48678540						chr9	91069988	91070396
chr8	83548639	83549760		chr6	120998427	120999774		chr11	69484026	69486672		chr4	62170649	62171594		chr14	48825410	48825822						chr9	94109445	94109835
chr8	85202426	85203139		chr6	121120482	121122220		chr11	69804082	69805591		chr4	62180555	62181692		chr14	49135245	49135595						chr9	98161832	98162204
chr8	87479991	87480783		chr6	124833179	124834052		chr11	70050818	70051939		chr4	62762888	62763539		chr14	49519801	49520192						chr9	103341243	103341902
chr8	89015732	89016676		chr6	125443298	125443841		chr11	70098159	70099016		chr4	62891022	62891647		chr14	51908828	51909157						chr9	105876164	105876560
chr8	95651663	95652826		chr6	127300248	127301040		chr11	70265137	70266160		chr4	62918200	62918872		chr14	52519098	52519433						chr9	106658149	106658511
chr8	95801939	95803216		chr6	127989064	127990139		chr11	70468249	70469825		chr4	65608047	65608560		chr14	55001513	55001966						chr9	110444948	110445416
chr8	95804093	95804972		chr6	127997093	127997881		chr11	70526428	70527138		chr4	71500553	71501083		chr14	55338861	55339280						chr9	117599058	117599489
chr8	101478544	101479752		chr6	128068633	128069667		chr11	70559162	70559720		chr4	71845276	71846134		chr14	55626302	55626672						chr9	119158276	119158721
chr8	101484425	101485761		chr6	128748585	128750354		chr11	70577084	70578344		chr4	72061854	72062234		chr14	56080646	56080974						chr9	122781636	122782110
chr8	107627117	107629766		chr6	134551287	134552451		chr11	70650251	70651134		chr4	76007478	76008358		chr14	56345111	56345501						chrX	46984358	46984817
chr8	109834683	109836510		chr6	134665315	134666302		chr11	70683675	70684379		chr4	81494189	81494615		chr14	57779326	57779800						chrX	89835955	89836370
chr8	116609359	116610696		chr6	135492225	135493105		chr11	70825951	70826907		chr4	82116647	82117397		chr14	58610626	58611080						chrX	102925469	102925938
chr8	116613297	116615789		chr6	136367456	136368435		chr11	72248111	72249708		chr4	82141383	82141888		chr14	59383880	59384212						chrX	108740392	108740817
chr8	116628766	116632318		chr6	145309096	145310264		chr11	72365156	72365794		chr4	88287459	88288051		chr14	59718600	59719012						chrX	108754316	108754616
chr8	116629120	116632318		chr6	146857362	146858133		chr11	72454845	72455394		chr4	97420042	97420666		chr14	59818000	59818344						chrX	125591028	125591306
chr8	116630545	116632318		chr7	4716560	4717296		chr11	72860643	72861905		chr4	97439743	97440312		chr14	61273418	61273859						chrX	139533811	139534391
chr8	116633210	116634330		chr7	14136069	14136766		chr11	72988977	72989862		chr4	97450571	97451412		chr14	61321593	61321936						chrX	139917349	139917832
chr8	118278493	118279145		chr7	14399108	14400182		chr11	73139603	73140669		chr4	97760869	97761773		chr14	62213934	62214359						chrX	160694030	160694390
chr8	125378882	125379658		chr7	14892679	14893647		chr11	74462440	74463286		chr4	100042221	100042886		chr14	63281311	63281609						chrX	163957188	163957637
chr8	126220958	126221646		chr7	16565419	16566383		chr11	74651203	74652472		chr4	101028094	101028513		chr14	63540237	63540621						chrY	500566	500895
chr8	130750261	130750969		chr7	16893964	16894883		chr11	74707937	74709122		chr4	102165906	102166641		chr14	63944658	63945077
chr9	7015456	7016441		chr7	26508570	26509494		chr11	74709652	74710544		chr4	103606804	103607466		chr14	64098115	64098598
chr9	11702968	11704240		chr7	26890923	26891759		chr11	75026808	75028962		chr4	104338119	104338725		chr14	64457017	64457387
chr9	20819675	20820720		chr7	26891764	26892455		chr11	75060048	75060747		chr4	104436436	104436873		chr14	65460454	65461209
chr9	22028041	22029226		chr7	27088222	27089327		chr11	75073415	75074356		chr4	104440612	104441444		chr14	65616305	65616660
chr9	22033408	22035532		chr7	27093561	27094526		chr11	75084231	75085184		chr4	104442774	104443392		chr14	66391798	66392763
chr9	22121789	22122776		chr7	27098558	27099205		chr11	75102154	75103130		chr4	104477234	104477958		chr14	66766076	66766648
chr9	24673022	24673871		chr7	27099899	27101445		chr11	75256727	75258700		chr4	104548840	104549363		chr14	68192826	68193246
chr9	32677781	32679274		chr7	27204857	27205621		chr11	75285901	75286878		chr4	106891971	106892512		chr14	69065276	69065706
chr9	43070218	43072769		chr7	27616540	27617318		chr11	75299600	75300762		chr4	107738922	107739598		chr14	69448067	69448531
chr9	44215211	44215828		chr7	27724108	27724859		chr11	75306340	75307202		chr4	115689483	115690077		chr14	69943066	69943451
chr9	50299978	50300700		chr7	27731054	27731853		chr11	75307860	75308773		chr4	116976619	116977415		chr14	70026023	70026351
chr9	55170168	55171018		chr7	27737701	27738864		chr11	75474698	75475427		chr4	117666263	117667050		chr14	70506753	70507321
chr9	66479583	66480337		chr7	29754377	29755819		chr11	76228029	76228994		chr4	117899703	117900675		chr14	70892853	70893604
chr9	67669525	67670668		chr7	31708610	31709778		chr11	77161428	77162543		chr4	117949097	117949702		chr14	71232271	71232915
chr9	67671896	67672939		chr7	31710341	31710826		chr11	77176718	77177591		chr4	118029087	118029841		chr14	73693652	73694029
chr9	69135910	69137005		chr7	47214306	47215221		chr11	77177700	77178442		chr4	119921384	119921899		chr14	73786339	73786805
chr9	72475753	72476881		chr7	51754356	51755150		chr11	77420938	77422024		chr4	120090613	120091260		chr14	75271044	75271379
chr9	74369926	74370933		chr7	56548060	56549194		chr11	77585501	77586598		chr4	120105467	120106128		chr14	75352112	75352556
chr9	74449970	74450737		chr7	56602458	56603326		chr11	77595608	77597556		chr4	122613008	122613735		chr14	75641880	75642303
chr9	74648609	74650212		chr7	56706373	56707277		chr11	77706935	77708359		chr4	123634702	123635597		chr14	76312514	76312774
chr9	74697361	74699814		chr7	56989515	56990619		chr11	77713489	77714822		chr4	123645432	123646409		chr14	76965947	76966499
chr9	74760723	74761298		chr7	59123335	59123772		chr11	77858095	77859183		chr4	123649747	123650286		chr14	80879764	80880174
chr9	76575089	76576013		chr7	63376430	63377161		chr11	78015935	78016943		chr4	124744036	124744648		chr14	87269402	87269622
chr9	77550879	77551890		chr7	73834539	73835378		chr11	78017834	78018789		chr4	125763156	125763685		chr14	88823934	88824294
chr9	77571766	77572654		chr7	73945620	73946560		chr11	78225032	78226633		chr4	128677865	128678396		chr14	90052059	90052356
chr9	79315128	79315935		chr7	74085432	74086275		chr11	78661153	78662474		chr4	130251242	130251898		chr14	93475066	93475399
chr9	79577803	79579468		chr7	75861949	75863310		chr11	78700363	78701207		chr4	132650981	132651512		chr14	99128808	99129474
chr9	79602776	79603853		chr7	79372189	79373053		chr11	78795208	78797382		chr4	133270261	133271014		chr14	99262836	99263258
chr9	79609622	79610749		chr7	79645507	79646390		chr11	78797941	78799149		chr4	134776828	134777658		chr14	99526674	99527093
chr9	80565558	80566596		chr7	86391072	86391867		chr11	78832827	78833871		chr4	138535791	138536348		chr14	99992175	99992564
chr9	80626305	80627206		chr7	86417572	86419792		chr11	79037700	79038924		chr4	139431601	139432416		chr14	100205313	100205618
chr9	83867815	83868499		chr7	86462890	86463846		chr11	79042581	79043365		chr4	139523292	139524238		chr14	100630572	100631055
chr9	93911401	93912486		chr7	86667698	86668419		chr11	79087158	79087812		chr4	141287519	141288286		chr14	100743929	100744406
chr9	98160470	98161227		chr7	87318614	87319379		chr11	79094591	79096356		chr4	141481560	141482224		chr14	106340501	106340929
chr9	100519697	100520642		chr7	88170499	88171330		chr11	79100496	79101661		chr4	141498095	141498830		chr14	114614941	114615264
chr9	105656402	105657216		chr7	89881036	89882075		chr11	79101665	79103034		chr4	146939284	146939940		chr14	114931171	114931409
chr9	107205287	107206518		chr7	96475072	96475846		chr11	79373906	79374803		chr4	146960430	146961118		chr14	115451603	115452248
chr9	110433216	110433965		chr7	106312853	106313704		chr11	79381698	79382475		chr4	146983572	146984329		chr14	119163084	119163568
chr9	112007088	112008013		chr7	106324976	106325745		chr11	79467284	79468445		chr4	149172827	149173468		chr14	120228610	120229188
chr9	119217898	119219002		chr7	106336983	106337737		chr11	79566282	79567133		chr4	150059210	150059885		chr14	120229951	120230673
chr9	120574983	120575634		chr7	109087930	109088805		chr11	79570883	79571722		chr4	150108761	150109276		chr14	121493126	121493480
chr9	121821752	121822838		chr7	109478869	109479538		chr11	79698115	79698904		chr4	152253020	152253595		chr14	123300204	123300881
chr9	122264764	122265638		chr7	116669012	116670423		chr11	79955201	79956281		chr4	154284662	154285528		chr14	124965650	124965922
chr9	122265977	122267570		chr7	118024965	118025907		chr11	79987165	79988459		chr4	154289300	154289695		chr15	3033817	3034125
chr9	122543106	122545900		chr7	119906696	119907787		chr11	80914089	80915522		chr4	155468692	155469820		chr15	3186300	3186718
chr9	122751321	122751919		chr7	120328457	120328908		chr11	81183332	81184235		chr5	9102674	9103178		chr15	3402022	3402546
chr9	122756229	122757094		chr7	120586959	120587536		chr11	81187549	81188379		chr5	20226385	20226868		chr15	3414387	3415595
chr9	122783531	122784893		chr7	123369948	123370734		chr11	81301976	81302877		chr5	24753044	24753881		chr15	3438482	3438957
chrX	7454765	7455552		chr7	124142821	124143275		chr11	82683200	82685236		chr5	29570612	29571147		chr15	3557823	3558718
chrX	7722608	7723484		chr7	125409298	125410265		chr11	83104637	83105607		chr5	31228568	31229026		chr15	4511736	4512011
chrX	7769488	7771051		chr7	126633476	126634576		chr11	83112054	83113062		chr5	34759302	34759966		chr15	4628544	4628960
chrX	10659866	10660689		chr7	130548849	130549906		chr11	83566733	83567775		chr5	35770483	35771381		chr15	4676922	4677341
chrX	11234559	11235611		chr7	133427376	133428618		chr11	83694575	83695578		chr5	37074665	37075302		chr15	4787119	4787492
chrX	11619814	11621277		chr7	133768813	133769565		chr11	83719039	83719822		chr5	37117495	37118123		chr15	5057588	5058032
chrX	11899335	11901052		chr7	136734915	136736359		chr11	83727397	83728538		chr5	42954497	42955120		chr15	6009106	6009872
chrX	12541603	12542603		chr7	139762835	139763915		chr11	83958436	83959243		chr5	44180684	44181016		chr15	6395012	6395503
chrX	14474360	14475114		chr7	139851881	139852568		chr11	83980169	83981424		chr5	51902553	51903370		chr15	6834294	6834728
chrX	14537207	14538211		chr7	139919487	139920170		chr11	84255676	84256723		chr5	52259328	52259953		chr15	6841931	6842248
chrX	16418369	16419490		chr7	141217766	141218338		chr11	84683256	84685207		chr5	53383391	53384094		chr15	7249957	7250305
chrX	18451095	18451964		chr7	142949630	142950479		chr11	84702688	84703534		chr5	53385086	53385629		chr15	8188473	8188935
chrX	18459353	18460373		chr7	144477595	144478303		chr11	86683951	86684805		chr5	54376659	54377221		chr15	8201555	8201927
chrX	20124679	20127026		chr7	144634469	144635064		chr11	86685202	86685894		chr5	54499858	54500352		chr15	8218203	8218565
chrX	33651317	33653978		chr7	146059753	146060449		chr11	86686177	86686935		chr5	64179253	64180047		chr15	8242429	8242924
chrX	34130969	34132306		chr7	146060496	146061117		chr11	86707486	86708234		chr5	64327807	64328525		chr15	8274028	8274411
chrX	34334322	34335163		chr7	148196094	148197067		chr11	86775047	86776011		chr5	65731188	65731865		chr15	9903462	9904051
chrX	34344031	34344680		chr7	148285421	148286241		chr11	86806380	86808921		chr5	65739964	65740968		chr15	10174893	10175457
chrX	35756063	35757479		chr7	149816199	149817245		chr11	86815486	86816230		chr5	66154230	66154621		chr15	10209851	10210324
chrX	35826421	35827409		chr7	151232163	151232832		chr11	87240138	87240952		chr5	70714753	70715283		chr15	10227791	10228247
chrX	38672940	38673860		chr7	151515377	151515963		chr11	87406058	87406881		chr5	72434987	72435529		chr15	10267760	10268064
chrX	39435774	39436684		chr7	151736143	151737472		chr11	87517529	87518683		chr5	72775744	72776313		chr15	11940396	11940829
chrX	39955403	39956021		chr7	152226399	152227580		chr11	87550173	87551169		chr5	72781497	72781969		chr15	21044649	21044825
chrX	40482842	40483609		chr8	8639541	8640248		chr11	87799393	87801222		chr5	73245398	73245982		chr15	21976669	21977034
chrX	46983902	46985207		chr8	9027618	9028582		chr11	88108785	88109836		chr5	73544096	73544744		chr15	24999458	24999845
chrX	49497276	49499378		chr8	10914380	10915328		chr11	88270045	88270849		chr5	73730858	73731605		chr15	25428393	25428844
chrX	50404247	50404961		chr8	10939458	10940515		chr11	88504436	88505207		chr5	74485573	74486020		chr15	25580110	25580547
chrX	54532974	54533903		chr8	11098137	11099120		chr11	88522603	88523393		chr5	75188114	75188717		chr15	25917728	25918110
chrX	57268725	57269445		chr8	11130844	11131518		chr11	88745568	88746158		chr5	75302921	75304140		chr15	26307208	26307636
chrX	70930040	70930937		chr8	11145031	11145878		chr11	88863845	88865556		chr5	76734745	76735263		chr15	27308623	27308999
chrX	74718312	74719373		chr8	11148682	11150024		chr11	88868881	88869611		chr5	87355317	87356113		chr15	28301266	28301682
chrX	74754312	74755602		chr8	11168851	11170024		chr11	88885233	88886322		chr5	87625147	87625953		chr15	31453145	31453543
chrX	74914977	74915525		chr8	11172670	11174362		chr11	90092789	90093465		chr5	87804734	87805346		chr15	32894508	32895270
chrX	81557474	81558283		chr8	11740568	11741440		chr11	90216364	90217020		chr5	87825869	87826567		chr15	32943842	32944341
chrX	82818415	82819387		chr8	11752693	11753460		chr11	90248923	90250204		chr5	88003353	88003827		chr15	33235375	33235777
chrX	82979471	82980379		chr8	12772137	12772716		chr11	94019518	94024081		chr5	89922789	89923220		chr15	36209543	36209959
chrX	83023285	83024139		chr8	13506391	13508034		chr11	94076500	94078412		chr5	90843168	90844038		chr15	36844456	36844896
chrX	90550811	90551679		chr8	13548697	13549333		chr11	94208158	94209173		chr5	90897983	90898898		chr15	36885953	36886382
chrX	96333181	96333905		chr8	13675963	13677062		chr11	94409746	94411420		chr5	91913224	91913923		chr15	37385725	37386193
chrX	96362254	96362741		chr8	19962662	19963660		chr11	94450529	94451515		chr5	92863924	92864559		chr15	37735314	37735725
chrX	98565704	98566537		chr8	24365460	24367258		chr11	94462742	94464399		chr5	93456422	93457072		chr15	40271334	40271811
chrX	98571360	98573007		chr8	24550660	24551059		chr11	94884470	94885405		chr5	96533700	96534085		chr15	41502654	41503064
chrX	98574560	98575825		chr8	25507171	25507974		chr11	95226745	95227562		chr5	96734237	96734796		chr15	41576036	41576704
chrX	106700389	106701467		chr8	25530504	25531447		chr11	95509987	95510677		chr5	96735142	96736272		chr15	41672534	41672913
chrX	108739211	108740923		chr8	25566963	25567936		chr11	95638912	95639859		chr5	96882257	96883009		chr15	43446453	43446891
chrX	125947792	125948505		chr8	26788410	26789315		chr11	95639904	95640853		chr5	98424984	98425348		chr15	44629524	44630416
chrX	127288681	127289495		chr8	31961804	31962382		chr11	95895662	95896569		chr5	99674990	99675764		chr15	50099066	50099430
chrX	135575176	135576158		chr8	36515616	36516694		chr11	95937818	95938638		chr5	99691319	99692073		chr15	50191847	50192298
chrX	136313124	136314540		chr8	37569143	37569744		chr11	96101266	96101865		chr5	102287819	102288775		chr15	50516034	50516424
chrX	136315089	136315839		chr8	42096968	42097956		chr11	96499073	96499987		chr5	102484463	102485030		chr15	51378399	51378766
chrX	136341464	136343460		chr8	42240346	42240921		chr11	96649764	96651323		chr5	102984832	102985545		chr15	51927624	51927845
chrX	137125638	137126596		chr8	46057217	46057845		chr11	96777263	96778324		chr5	103071803	103072384		chr15	51946215	51946604
chrX	138924320	138925281		chr8	46092310	46092984		chr11	96798681	96800159		chr5	104236210	104236974		chr15	52048849	52049204
chrX	139540274	139540795		chr8	47567011	47567879		chr11	97043567	97044502		chr5	106133819	106134475		chr15	52209612	52209987
chrX	140324293	140324733		chr8	64085281	64086295		chr11	97176434	97177346		chr5	108251406	108251856		chr15	52907306	52907729
chrX	147925056	147926090		chr8	70803243	70804096		chr11	97192312	97193101		chr5	108415085	108415501		chr15	53077453	53077799
chrX	148237232	148238106		chr8	74800937	74801832		chr11	97288514	97289571		chr5	111845130	111845830		chr15	53117488	53117871
chrX	149202555	149203778		chr8	77735254	77736313		chr11	97295893	97296844		chr5	115031479	115031937		chr15	53374366	53374763
chrX	152913620	152914203		chr8	81906296	81907420		chr11	97310490	97311640		chr5	115207103	115207593		chr15	54430167	54430504
chrX	156575039	156576096		chr8	82024940	82025591		chr11	97546627	97547305		chr5	117742225	117742976		chr15	55056325	55056794
chrX	160183560	160184551		chr8	84159640	84160695		chr11	97574905	97575792		chr5	118617683	118618191		chr15	55134696	55135249
chrX	161487662	161488447		chr8	91645845	91647540		chr11	97643342	97644309		chr5	121145972	121146626		chr15	57744663	57745029
chrX	161489139	161490143		chr8	91856731	91857417		chr11	97828391	97829052		chr5	121995756	121996700		chr15	57924574	57925085
chrX	161626949	161627548		chr8	91896240	91897268		chr11	98125884	98126936		chr5	122041682	122042192		chr15	58307496	58307868
chrX	163116107	163116907		chr8	91980132	91980978		chr11	98154280	98155302		chr5	122113335	122114044		chr15	58953000	58953483
chrX	165507830	165508335		chr8	92039361	92040906		chr11	98425026	98425755		chr5	122186431	122187184		chr15	59148634	59148945
chrX	165515810	165516593		chr8	92915356	92916322		chr11	98543290	98544117		chr5	122211488	122212063		chr15	60930053	60930422
chrX	165543676	165544925		chr8	97723660	97724671		chr11	98569716	98571049		chr5	122398055	122399024		chr15	61848685	61849123
				chr8	108243230	108244185		chr11	98637720	98638822		chr5	122448648	122449448		chr15	62575438	62575843
				chr8	110015055	110015595		chr11	98643658	98645859		chr5	122466481	122467693		chr15	62578071	62578453
				chr8	118229200	118230015		chr11	98697609	98698575		chr5	122470315	122470697		chr15	64318505	64318886
				chr8	119063808	119064605		chr11	98805195	98805729		chr5	122511473	122512097		chr15	65905525	65905927
				chr8	119444768	119445621		chr11	98812581	98813305		chr5	122977624	122978257		chr15	66014476	66014944
				chr8	119946818	119947789		chr11	98923764	98925583		chr5	123250167	123250928		chr15	66615364	66615664
				chr8	122033837	122034687		chr11	99021296	99022229		chr5	124403774	124404426		chr15	66737574	66738149
				chr8	123026051	123026757		chr11	100176536	100177423		chr5	124468127	124468824		chr15	66781151	66781680
				chr8	123734303	123735000		chr11	100180793	100182560		chr5	124681481	124682057		chr15	66844948	66845526
				chr8	124804982	124806030		chr11	100249713	100250493		chr5	125648267	125648983		chr15	66851462	66851910
				chr8	124987067	124988245		chr11	100480429	100481868		chr5	125766372	125766970		chr15	66896361	66896792
				chr8	126181547	126182383		chr11	100652286	100653226		chr5	125777399	125777949		chr15	68886101	68886355
				chr8	128016902	128018077		chr11	100698034	100698807		chr5	125861795	125862412		chr15	73637009	73637455
				chr8	129218136	129218944		chr11	100703191	100703986		chr5	127012344	127012958		chr15	74950469	74950845
				chr8	129703464	129704121		chr11	100731387	100732545		chr5	127024675	127025134		chr15	75106833	75107304
				chr9	13473103	13473633		chr11	100792025	100793323		chr5	127434575	127435135		chr15	75797294	75798065
				chr9	15339346	15340685		chr11	100799284	100800023		chr5	128118602	128119448		chr15	77066441	77067091
				chr9	15513297	15514022		chr11	100956281	100957419		chr5	130732164	130732733		chr15	77575522	77576018
				chr9	20769849	20770480		chr11	100991260	100991994		chr5	134903652	134904343		chr15	80637565	80637963
				chr9	21637610	21638529		chr11	101217043	101217824		chr5	135210455	135211054		chr15	81090780	81091091
				chr9	24977141	24978382		chr11	101222625	101223288		chr5	137042488	137043300		chr15	81130185	81130685
				chr9	25135471	25136098		chr11	101225569	101226746		chr5	137943794	137944373		chr15	82285485	82289049
				chr9	25391139	25391937		chr11	101346960	101347858		chr5	138115719	138116527		chr15	82403294	82403667
				chr9	25602694	25603395		chr11	101380334	101381423		chr5	138453587	138454130		chr15	82444796	82445407
				chr9	35494288	35494930		chr11	101487969	101489657		chr5	138527029	138527669		chr15	84505763	84506215
				chr9	36604934	36605466		chr11	101519413	101520582		chr5	139424013	139424548		chr15	84803531	84804146
				chr9	37376820	37377619		chr11	101568104	101568867		chr5	140667174	140668032		chr15	85160511	85160930
				chr9	43560311	43561216		chr11	101848223	101849184		chr5	140682372	140683198		chr15	87228835	87229204
				chr9	44499606	44500812		chr11	101900617	101901899		chr5	143696727	143697109		chr15	88015364	88015671
				chr9	45623006	45623686		chr11	102027245	102028158		chr5	144158101	144158865		chr15	88020955	88021394
				chr9	45769479	45770731		chr11	102077336	102078734		chr5	145119221	145119903		chr15	89227205	89227700
				chr9	45857323	45858543		chr11	102101811	102103266		chr5	145711383	145712051		chr15	89762783	89763181
				chr9	48412367	48413684		chr11	102124338	102125870		chr5	146187724	146188321		chr15	90747560	90747929
				chr9	50605586	50607099		chr11	102236455	102237720		chr5	146191712	146192411		chr15	90863907	90864943
				chr9	53417160	53418915		chr11	102253400	102254864		chr5	146215215	146215891		chr15	91033706	91034356
				chr9	54565204	54566129		chr11	102282802	102283614		chr5	146395882	146396459		chr15	91106439	91106892
				chr9	56696053	56697065		chr11	102291151	102292705		chr5	146622940	146623343		chr15	92401663	92401981
				chr9	57512022	57513116		chr11	102293793	102294892		chr5	146832653	146833308		chr15	94772439	94772731
				chr9	57678855	57680004		chr11	102326871	102327978		chr5	147408133	147409463		chr15	95574272	95574636
				chr9	61170832	61171624		chr11	102418252	102419276		chr5	149833341	149833856		chr15	95580438	95580858
				chr9	61721110	61722145		chr11	102615665	102616539		chr5	150438440	150438999		chr15	95665933	95666324
				chr9	64441984	64442988		chr11	102635041	102635838		chr5	151072900	151073776		chr15	96237525	96237951
				chr9	65068446	65069286		chr11	102963806	102964778		chr5	151635805	151636532		chr15	96506798	96507328
				chr9	65270089	65271367		chr11	102993995	102994872		chr6	5171942	5172503		chr15	96709842	96710205
				chr9	66890571	66891405		chr11	103776872	103777730		chr6	5206020	5206457		chr15	96733946	96734268
				chr9	67324860	67326028		chr11	103919615	103920497		chr6	5399745	5400309		chr15	96849764	96850284
				chr9	68634181	68634731		chr11	104411874	104412565		chr6	5429810	5430186		chr15	97112209	97112766
				chr9	68854158	68854815		chr11	105907623	105908589		chr6	9011320	9012070		chr15	98753108	98753730
				chr9	70389924	70390771		chr11	106273828	106274652		chr6	21845277	21845803		chr15	99621252	99621820
				chr9	70675307	70676300		chr11	106361903	106364467		chr6	23097914	23098660		chr15	100917300	100917731
				chr9	71600478	71601559		chr11	106449860	106450739		chr6	24212607	24213290		chr15	101752578	101753127
				chr9	72761025	72762396		chr11	106528829	106529922		chr6	24298516	24299087		chr16	4303469	4303908
				chr9	73989567	73990230		chr11	106610433	106610968		chr6	28078939	28079306		chr16	4395076	4395540
				chr9	77799717	77800437		chr11	106836438	106838365		chr6	28604354	28604996		chr16	5532353	5532805
				chr9	83095901	83096677		chr11	106875759	106876775		chr6	28847324	28847678		chr16	9527286	9527709
				chr9	94058370	94058988		chr11	106906734	106907716		chr6	32952779	32953335		chr16	9588569	9589040
				chr9	96304727	96305585		chr11	106993331	106994461		chr6	34605618	34606305		chr16	9672903	9673221
				chr9	99149292	99149955		chr11	107065739	107066720		chr6	34846263	34846877		chr16	9680416	9681106
				chr9	100891604	100892251		chr11	107087063	107088382		chr6	35035105	35035631		chr16	10358162	10358614
				chr9	101164138	101165112		chr11	107124908	107126999		chr6	35475665	35476174		chr16	10649292	10649728
				chr9	106690454	106691249		chr11	107131670	107132661		chr6	35696085	35696562		chr16	10741267	10741540
				chr9	107208116	107209158		chr11	107327677	107328512		chr6	37482028	37482707		chr16	11266536	11267057
				chr9	107376097	107376859		chr11	107434514	107435849		chr6	37701499	37702221		chr16	11766427	11766855
				chr9	110782699	110784076		chr11	108113469	108114406		chr6	37778874	37780203		chr16	11811376	11811711
				chr9	111162918	111163536		chr11	108689456	108690396		chr6	37821490	37822174		chr16	13240506	13240921
				chr9	115293065	115293676		chr11	108719035	108719794		chr6	40994174	40994875		chr16	13276287	13276663
				chr9	117624090	117624907		chr11	109329353	109330074		chr6	42173209	42173772		chr16	13313380	13313857
				chr9	118068707	118069493		chr11	109338829	109339874		chr6	43474308	43474676		chr16	13440519	13440955
				chr9	118848360	118849382		chr11	109346621	109347868		chr6	49007253	49007898		chr16	13689400	13689789
				chr9	119842510	119843485		chr11	109417297	109418099		chr6	49160443	49161118		chr16	14155744	14156196
				chr9	120630353	120631745		chr11	109491307	109491878		chr6	50256691	50257382		chr16	14162461	14162831
				chr9	120910600	120911359		chr11	109516436	109517076		chr6	51419646	51420234		chr16	15550404	15550746
				chr9	123115645	123116720		chr11	109632577	109633216		chr6	53995656	53996262		chr16	15550998	15551286
				chr9	123723853	123724601		chr11	109683569	109684252		chr6	53997050	53997879		chr16	15924011	15924292
				chrX	32099000	32100079		chr11	109856074	109857681		chr6	54074318	54075380		chr16	16565948	16566320
				chrX	34305642	34306618		chr11	110228600	110229512		chr6	54075418	54075946		chr16	16888394	16888795
				chrX	47925383	47926124		chr11	110312626	110313331		chr6	54206309	54206947		chr16	17463712	17464216
				chrX	47929864	47930763		chr11	110338918	110339831		chr6	55132887	55133626		chr16	17532858	17533436
				chrX	47960850	47961693		chr11	111832037	111832978		chr6	56855415	56856048		chr16	18846473	18847004
				chrX	96024377	96025062		chr11	111899807	111900577		chr6	56869684	56870768		chr16	19146735	19147076
				chrX	164458550	164459328		chr11	112080163	112081206		chr6	59003139	59003791		chr16	20022022	20022407
								chr11	112643249	112643997		chr6	59020324	59020957		chr16	20159717	20159998
								chr11	112871931	112872864		chr6	70821403	70821764		chr16	20418173	20418455
								chr11	112951241	112951994		chr6	72194872	72195379		chr16	21781305	21781775
								chr11	113026145	113027076		chr6	72363813	72364650		chr16	22922451	22922891
								chr11	113591947	113592778		chr6	72410251	72410977		chr16	23031079	23031713
								chr11	114691016	114692300		chr6	85773253	85774260		chr16	23337104	23337973
								chr11	115025671	115027452		chr6	85793836	85794468		chr16	24034590	24035012
								chr11	115137844	115141859		chr6	86334002	86334831		chr16	24254290	24254666
								chr11	115153796	115155190		chr6	87207307	87208001		chr16	24305416	24305939
								chr11	115158441	115159306		chr6	87987289	87988051		chr16	24878942	24879466
								chr11	115293674	115294847		chr6	88000361	88000940		chr16	24963647	24964009
								chr11	115323140	115324150		chr6	90425747	90426483		chr16	25086301	25086666
								chr11	115540770	115541838		chr6	90436472	90437085		chr16	25143463	25143648
								chr11	115557586	115558977		chr6	94065382	94065958		chr16	25351644	25351950
								chr11	115693243	115695038		chr6	94207572	94208238		chr16	25544286	25544778
								chr11	115865954	115867920		chr6	97211975	97212706		chr16	25875711	25876121
								chr11	115952717	115953706		chr6	98969745	98970339		chr16	25899820	25900239
								chr11	115956774	115957318		chr6	98971057	98972080		chr16	26358084	26358504
								chr11	116028699	116030494		chr6	99121717	99122419		chr16	26562549	26563305
								chr11	116079375	116081667		chr6	99156228	99157313		chr16	26565998	26566467
								chr11	116542090	116543033		chr6	108086048	108086642		chr16	26644365	26644651
								chr11	116700818	116701664		chr6	112833451	112834316		chr16	26706576	26707155
								chr11	117065729	117066973		chr6	114613632	114614225		chr16	28845526	28845842
								chr11	117083945	117084661		chr6	115368990	115369554		chr16	30335364	30335893
								chr11	117108053	117109056		chr6	115415318	115415968		chr16	30374365	30374752
								chr11	117197188	117198168		chr6	116846093	116846795		chr16	31172331	31172729
								chr11	117205729	117206654		chr6	117122248	117122851		chr16	31557635	31558029
								chr11	117219384	117220055		chr6	121777828	121778508		chr16	31651710	31652156
								chr11	117479433	117480406		chr6	121786164	121786996		chr16	32818509	32818858
								chr11	117515182	117516215		chr6	121925623	121926302		chr16	33153556	33154152
								chr11	117796757	117797487		chr6	123338395	123339329		chr16	33963419	33963979
								chr11	117825849	117827342		chr6	128227399	128228032		chr16	34326014	34326466
								chr11	117830013	117831845		chr6	128546917	128547590		chr16	35097566	35098660
								chr11	118584412	118585536		chr6	134110580	134111590		chr16	35617774	35618175
								chr11	118586964	118588991		chr6	134158200	134158798		chr16	35707153	35707424
								chr11	118907567	118908649		chr6	134466985	134467767		chr16	35743402	35743870
								chr11	118987172	118988813		chr6	134741021	134741557		chr16	36177420	36177838
								chr11	118994794	118995767		chr6	135116848	135117655		chr16	36559643	36560162
								chr11	119044850	119046962		chr6	138029064	138029783		chr16	37432028	37432360
								chr11	119078968	119079640		chr6	138087199	138087909		chr16	37449921	37450345
								chr11	119129018	119130212		chr6	138089617	138090322		chr16	37525126	37525856
								chr11	119367683	119368276		chr6	139825070	139825808		chr16	37724597	37724891
								chr11	119797396	119798759		chr6	141908812	141909601		chr16	37994727	37995122
								chr11	119806449	119807364		chr6	141963887	141964540		chr16	38097655	38098060
								chr11	119808564	119809387		chr6	142475963	142476637		chr16	41242989	41243412
								chr11	119809829	119810745		chr6	142762484	142762875		chr16	42309604	42309935
								chr11	119848990	119850174		chr6	143479153	143479723		chr16	42836545	42836894
								chr11	119867564	119868296		chr6	144015833	144016479		chr16	42973038	42973418
								chr11	120045298	120047462		chr6	144190804	144191490		chr16	43072550	43072906
								chr11	120050029	120052027		chr6	144576140	144576735		chr16	43328257	43328738
								chr11	120091093	120092248		chr6	144657509	144658079		chr16	43335345	43336416
								chr11	120092254	120093221		chr6	144675314	144675981		chr16	43536078	43536475
								chr11	120201184	120202033		chr6	145546737	145547209		chr16	44165224	44165682
								chr11	120358519	120365762		chr6	145547698	145548181		chr16	45810334	45810657
								chr11	120371024	120372007		chr6	145710507	145711088		chr16	45976353	45976781
								chr11	120432107	120432978		chr6	145777472	145778113		chr16	45985262	45985691
								chr11	120440862	120444147		chr6	146852084	146852803		chr16	46101264	46101595
								chr11	120468955	120473030		chr6	146874889	146875447		chr16	46131403	46131845
								chr11	120489851	120493540		chr6	148263942	148264630		chr16	46429442	46429807
								chr11	120520152	120521593		chr6	149061387	149061860		chr16	46508831	46509270
								chr11	120535713	120536677		chr7	6195766	6196597		chr16	46605420	46605866
								chr11	120852417	120853656		chr7	6206052	6206930		chr16	46798593	46798991
								chr11	120855711	120856703		chr7	12595612	12596294		chr16	49530077	49530560
								chr11	120919188	120919980		chr7	14222812	14223424		chr16	49532124	49532487
								chr11	121097575	121098874		chr7	14399116	14399898		chr16	49533529	49533958
								chr11	121187228	121188660		chr7	14893940	14894514		chr16	50764076	50764548
								chr11	121189349	121190414		chr7	15023674	15024416		chr16	52016094	52016448
								chr11	121208281	121208968		chr7	15031763	15032400		chr16	52044622	52044954
								chr11	121371627	121372725		chr7	15103533	15104227		chr16	52129472	52129843
								chr12	3981958	3982715		chr7	15107797	15108621		chr16	52249369	52249660
								chr12	4159151	4159754		chr7	16898114	16898733		chr16	52267392	52267770
								chr12	7925206	7926350		chr7	25628715	25629463		chr16	52324884	52325531
								chr12	7984007	7989085		chr7	25634259	25634838		chr16	52438404	52439065
								chr12	8027566	8028335		chr7	26700932	26701692		chr16	52560434	52560806
								chr12	8044787	8045775		chr7	26771673	26772674		chr16	52675944	52676426
								chr12	8340165	8341557		chr7	26808755	26809012		chr16	52689747	52690049
								chr12	8502653	8503505		chr7	26839697	26840531		chr16	54901573	54902050
								chr12	8562054	8562876		chr7	26928474	26928739		chr16	56279824	56280241
								chr12	8771251	8771911		chr7	26995576	26996320		chr16	56848427	56848799
								chr12	8777568	8779008		chr7	27909190	27909920		chr16	57520255	57520582
								chr12	8799863	8801887		chr7	28835202	28835643		chr16	60232757	60233159
								chr12	8835669	8836982		chr7	31930715	31931307		chr16	62872455	62873029
								chr12	8837582	8838477		chr7	36343672	36344255		chr16	65672351	65672686
								chr12	8883271	8884388		chr7	56004232	56005035		chr16	66042337	66042702
								chr12	12816796	12817530		chr7	56185675	56186163		chr16	70260355	70260829
								chr12	13731036	13731775		chr7	56281060	56281787		chr16	71704843	71705288
								chr12	15658086	15658809		chr7	56685101	56685626		chr16	73738759	73739153
								chr12	17432242	17433193		chr7	56712450	56713255		chr16	76331505	76331954
								chr12	17448016	17448885		chr7	70067797	70068390		chr16	76398538	76398982
								chr12	17456296	17457147		chr7	73148960	73149469		chr16	76454031	76454419
								chr12	17476406	17477819		chr7	73984172	73984742		chr16	77354432	77354872
								chr12	21148520	21149265		chr7	74848704	74849322		chr16	77359454	77360134
								chr12	25490629	25491424		chr7	76061730	76062672		chr16	79059022	79059438
								chr12	25824732	25825942		chr7	77397862	77398679		chr16	81353180	81353554
								chr12	25861375	25862044		chr7	77660018	77660966		chr16	84650777	84651221
								chr12	25911026	25911807		chr7	77669003	77670211		chr16	84807937	84808434
								chr12	25950125	25951022		chr7	77729159	77729749		chr16	85000598	85001006
								chr12	26512737	26513271		chr7	78688815	78689730		chr16	85075587	85075924
								chr12	27144803	27145646		chr7	79437012	79438056		chr16	86501787	86502147
								chr12	28579305	28580128		chr7	79448795	79449230		chr16	86817450	86818165
								chr12	29585039	29585713		chr7	79490603	79491516		chr16	87488727	87489276
								chr12	30885367	30886066		chr7	82678031	82678606		chr16	87661969	87662484
								chr12	30997596	30998480		chr7	86403853	86404711		chr16	87676410	87676867
								chr12	31032343	31033415		chr7	87256082	87256660		chr16	87690737	87691218
								chr12	31045495	31046762		chr7	88095010	88095651		chr16	87756027	87756572
								chr12	31051730	31053489		chr7	88832557	88833100		chr16	88252536	88253246
								chr12	31056991	31058435		chr7	91260882	91261635		chr16	88583634	88584065
								chr12	31621526	31622400		chr7	91291731	91292241		chr16	90191469	90191923
								chr12	31627974	31629042		chr7	95444482	95445064		chr16	90385111	90385587
								chr12	32095507	32096292		chr7	99969422	99970176		chr16	91271866	91272284
								chr12	33366638	33367484		chr7	99982908	99983307		chr16	91767330	91767862
								chr12	33451426	33452758		chr7	106271791	106272387		chr16	91871911	91872393
								chr12	33452784	33453777		chr7	106344046	106344543		chr16	91937500	91937977
								chr12	33860467	33861193		chr7	106357088	106357616		chr16	92076919	92077418
								chr12	33996229	33997286		chr7	106559795	106560442		chr16	92234795	92235203
								chr12	33998727	33999436		chr7	119588410	119589091		chr16	93324720	93325664
								chr12	35682364	35683292		chr7	120403863	120404626		chr16	93715890	93716569
								chr12	35748375	35749037		chr7	122797421	122797818		chr16	93874905	93875994
								chr12	36347584	36348298		chr7	123428784	123429241		chr16	94423482	94423808
								chr12	37107953	37109109		chr7	125851254	125851764		chr16	94871476	94871954
								chr12	40955328	40956037		chr7	130147991	130148595		chr16	95264410	95264905
								chr12	41770943	41771931		chr7	131703505	131704199		chr16	96483717	96484220
								chr12	45007924	45008678		chr7	132695378	132695850		chr16	97165178	97165744
								chr12	45349227	45349946		chr7	135042557	135043063		chr16	97209030	97209423
								chr12	45374996	45375761		chr7	135614331	135615073		chr16	97502873	97503252
								chr12	52945565	52946659		chr7	135700431	135701063		chr16	97619485	97620097
								chr12	53130846	53131753		chr7	138598257	138598736		chr16	97978072	97978588
								chr12	53420029	53420602		chr7	140130577	140131206		chr16	98134004	98134375
								chr12	53497139	53498214		chr7	145934168	145934734		chr17	3369584	3369979
								chr12	53575347	53576118		chr7	147893210	147894201		chr17	4640566	4641726
								chr12	55884395	55885129		chr7	147902980	147903710		chr17	4825520	4825827
								chr12	56574153	56575742		chr7	147913989	147914633		chr17	4867946	4868386
								chr12	56591397	56594174		chr7	148020890	148021797		chr17	5548514	5549020
								chr12	57641565	57642509		chr7	148824112	148824405		chr17	5553470	5553921
								chr12	58321609	58322148		chr7	149847652	149848224		chr17	5569209	5569749
								chr12	58503235	58503922		chr7	151226046	151226776		chr17	5606043	5606623
								chr12	58545096	58545903		chr8	4319615	4320265		chr17	5965131	5965647
								chr12	58547896	58548748		chr8	11458316	11458782		chr17	9590376	9590733
								chr12	58644001	58645097		chr8	18715081	18715570		chr17	11225256	11225597
								chr12	58750833	58752121		chr8	19892453	19892844		chr17	11411985	11412278
								chr12	58964279	58965310		chr8	26593979	26594466		chr17	11873070	11873475
								chr12	60113907	60114666		chr8	26894576	26895242		chr17	13957679	13958067
								chr12	60295561	60296866		chr8	27460178	27461245		chr17	14310466	14310945
								chr12	66066223	66066948		chr8	30879270	30879682		chr17	15158918	15159573
								chr12	70854500	70855187		chr8	32383232	32383786		chr17	15190288	15190910
								chr12	70858454	70859550		chr8	34918112	34918733		chr17	15364408	15364757
								chr12	71022912	71023952		chr8	35041588	35042441		chr17	15477308	15477756
								chr12	71085900	71086717		chr8	37650249	37650900		chr17	15478407	15478817
								chr12	71297251	71297933		chr8	37728690	37729407		chr17	15530785	15531129
								chr12	71560470	71561245		chr8	37731288	37732182		chr17	15593489	15593983
								chr12	71808287	71809496		chr8	37767608	37768266		chr17	15728428	15728779
								chr12	72100047	72101384		chr8	37775948	37776565		chr17	16998060	16998374
								chr12	72455271	72456812		chr8	46366171	46366714		chr17	18460019	18460370
								chr12	72964581	72965760		chr8	46409616	46410169		chr17	18480383	18480646
								chr12	72985847	72987661		chr8	46442771	46443864		chr17	19037683	19037970
								chr12	73097713	73098760		chr8	47824473	47825046		chr17	24380242	24380712
								chr12	73185437	73187559		chr8	47827299	47827905		chr17	24905664	24906024
								chr12	73386120	73387430		chr8	47922501	47923186		chr17	26912786	26913139
								chr12	73682362	73683848		chr8	47923267	47923803		chr17	28574880	28575694
								chr12	73738821	73739497		chr8	49728251	49728950		chr17	29521614	29522738
								chr12	73887316	73888241		chr8	58709524	58710257		chr17	29556803	29557385
								chr12	73892836	73893836		chr8	58748317	58748930		chr17	29592074	29593058
								chr12	74387407	74388079		chr8	58756783	58757461		chr17	31241891	31242357
								chr12	74638395	74639403		chr8	59045197	59045608		chr17	31290048	31290291
								chr12	76580888	76581749		chr8	64037990	64038731		chr17	31456312	31456691
								chr12	76807247	76808266		chr8	73347578	73348395		chr17	32617105	32617379
								chr12	77535139	77535835		chr8	73351738	73352333		chr17	32854764	32855072
								chr12	77738269	77738957		chr8	81917099	81917549		chr17	33056006	33056459
								chr12	77866107	77867000		chr8	84925272	84926017		chr17	35112662	35113209
								chr12	78450285	78450972		chr8	88125423	88126032		chr17	35262469	35262879
								chr12	78598926	78599767		chr8	91379622	91380101		chr17	36567247	36567638
								chr12	78602603	78603785		chr8	91887961	91888728		chr17	37305339	37305537
								chr12	79053245	79054064		chr8	91889262	91889828		chr17	40943442	40943823
								chr12	79087103	79088366		chr8	91930459	91931149		chr17	43075711	43076114
								chr12	79753368	79754095		chr8	92039886	92040491		chr17	43242992	43243466
								chr12	80204640	80205379		chr8	92668996	92669470		chr17	43407300	43407768
								chr12	80679132	80679898		chr8	93904919	93906109		chr17	43726755	43727108
								chr12	81180409	81181593		chr8	94704691	94705253		chr17	44193989	44194487
								chr12	81184600	81185565		chr8	95673198	95673810		chr17	45962750	45963159
								chr12	81203604	81205354		chr8	95752868	95753837		chr17	47941973	47942448
								chr12	81225015	81225905		chr8	95757263	95758489		chr17	48156638	48156957
								chr12	81246172	81247021		chr8	95776023	95777081		chr17	49562138	49562723
								chr12	81251008	81251567		chr8	96696244	96696769		chr17	50528323	50529357
								chr12	81317057	81318214		chr8	97946147	97946816		chr17	50709602	50709860
								chr12	81925280	81926076		chr8	97947518	97948241		chr17	51991979	51992375
								chr12	81955411	81956364		chr8	98327861	98328526		chr17	53785924	53786340
								chr12	81987985	81988760		chr8	101485237	101485678		chr17	57069537	57069990
								chr12	82031757	82033103		chr8	107569660	107570259		chr17	58205818	58206183
								chr12	82045945	82047824		chr8	107802866	107803442		chr17	63495112	63495620
								chr12	82076451	82077966		chr8	110111519	110112050		chr17	64107172	64107782
								chr12	83044236	83045461		chr8	111229283	111231478		chr17	64816064	64816531
								chr12	83433659	83435427		chr8	111231635	111232196		chr17	64926817	64927272
								chr12	84036166	84036735		chr8	113314320	113314804		chr17	65944023	65944446
								chr12	84156482	84157225		chr8	113426378	113427053		chr17	66289178	66289574
								chr12	84716245	84717298		chr8	114251281	114251985		chr17	70172222	70172620
								chr12	84919917	84920815		chr8	116641009	116641981		chr17	70310278	70310553
								chr12	85262305	85263612		chr8	121955257	121955980		chr17	71010688	71011077
								chr12	85352310	85352965		chr8	121956146	121956797		chr17	71184921	71185275
								chr12	85361480	85361917		chr8	123066783	123067268		chr17	71446134	71446884
								chr12	85373513	85374357		chr8	124453950	124454623		chr17	72178050	72178412
								chr12	85382840	85383789		chr8	124830563	124831390		chr17	73037887	73038975
								chr12	85391421	85392185		chr8	126499984	126500774		chr17	73536220	73536673
								chr12	85392969	85394631		chr8	127004725	127005287		chr17	74468092	74468561
								chr12	85656988	85658781		chr8	127657872	127658275		chr17	75706219	75707117
								chr12	85702294	85703343		chr8	127869422	127869896		chr17	75730801	75731148
								chr12	85740490	85742225		chr8	129609315	129609882		chr17	76174862	76175286
								chr12	85791063	85792675		chr9	21248291	21248753		chr17	78174186	78174465
								chr12	85958041	85958843		chr9	28058798	28059378		chr17	78722009	78722560
								chr12	86113207	86114234		chr9	29286633	29287217		chr17	78780602	78780933
								chr12	86493815	86494422		chr9	29944990	29945640		chr17	79392004	79392446
								chr12	87086505	87088021		chr9	32869576	32870024		chr17	80000497	80000926
								chr12	87099370	87100373		chr9	34864908	34865546		chr17	80008895	80009390
								chr12	87150104	87151189		chr9	44553395	44553829		chr17	80023102	80023607
								chr12	87165109	87166461		chr9	46067044	46067769		chr17	81024492	81024889
								chr12	87855679	87856462		chr9	46078036	46078593		chr17	81112940	81113296
								chr12	87897444	87898224		chr9	47324159	47324794		chr17	81775270	81775665
								chr12	88141832	88143743		chr9	47368929	47369445		chr17	81784769	81785282
								chr12	88220211	88221091		chr9	47391193	47391714		chr17	81926585	81926904
								chr12	88224929	88226232		chr9	47432547	47433696		chr17	83489220	83489612
								chr12	88246849	88247766		chr9	48393496	48394111		chr17	83966445	83967219
								chr12	88256256	88257176		chr9	50378581	50379082		chr17	84382496	84382835
								chr12	88259468	88260153		chr9	50475404	50476154		chr17	84633067	84633412
								chr12	88287701	88289364		chr9	54363633	54364227		chr17	86463378	86463702
								chr12	88728962	88730177		chr9	56428772	56429166		chr17	86813939	86814327
								chr12	89598819	89599619		chr9	57572327	57573064		chr17	87015161	87015765
								chr12	92876597	92877450		chr9	61218101	61218752		chr17	87310196	87310686
								chr12	92922372	92923171		chr9	61660090	61660608		chr17	88859851	88860231
								chr12	92931324	92932450		chr9	62008449	62008973		chr17	88873746	88874066
								chr12	92932753	92933828		chr9	62193006	62193617		chr17	89013618	89013962
								chr12	99761973	99763141		chr9	62623440	62624411		chr17	90045267	90045676
								chr12	99912612	99913529		chr9	63031611	63032110		chr17	92274594	92274894
								chr12	99984099	99985447		chr9	63194578	63195262		chr17	94139878	94140303
								chr12	100071887	100072738		chr9	64585670	64586382		chr17	94140624	94141131
								chr12	100335216	100336466		chr9	65596143	65596727		chr17	95055681	95056441
								chr12	100471554	100473306		chr9	70782233	70782983		chr18	3420817	3421163
								chr12	100580223	100581262		chr9	71023243	71024309		chr18	3423745	3424029
								chr12	100612251	100613197		chr9	74176549	74177018		chr18	4257943	4258491
								chr12	100664245	100665031		chr9	74223211	74223703		chr18	4796488	4796927
								chr12	101437241	101438546		chr9	74504153	74504803		chr18	4827119	4827727
								chr12	101519238	101520383		chr9	74559373	74560028		chr18	6103617	6103897
								chr12	102027771	102028721		chr9	74695957	74696581		chr18	6146211	6146605
								chr12	103100558	103101227		chr9	74794363	74795011		chr18	7644614	7645055
								chr12	103706900	103707746		chr9	74828009	74828667		chr18	7847543	7847952
								chr12	104052543	104053633		chr9	74840992	74841719		chr18	7881717	7882050
								chr12	104563473	104564247		chr9	77577294	77578011		chr18	8657320	8657768
								chr12	104564694	104565833		chr9	77774683	77775355		chr18	8719677	8720616
								chr12	104586229	104587351		chr9	77878493	77879474		chr18	8933566	8934222
								chr12	104715597	104716282		chr9	78302929	78303404		chr18	9002017	9002491
								chr12	104871559	104872467		chr9	78359277	78360332		chr18	9275390	9275743
								chr12	104873851	104874563		chr9	79602876	79603612		chr18	9490479	9492028
								chr12	104892295	104896009		chr9	79625229	79625735		chr18	9672651	9672926
								chr12	104896225	104898975		chr9	85218875	85219536		chr18	9700886	9701266
								chr12	104903414	104904100		chr9	86311601	86312170		chr18	11057619	11057968
								chr12	105000510	105001932		chr9	91069838	91070414		chr18	11317568	11317940
								chr12	105090937	105091720		chr9	95442941	95443723		chr18	11328587	11328991
								chr12	105097076	105097749		chr9	95985692	95986234		chr18	12606187	12606963
								chr12	105098791	105100664		chr9	100519777	100520414		chr18	12708631	12709117
								chr12	105100786	105101758		chr9	104696670	104697227		chr18	12713438	12714528
								chr12	105130117	105133963		chr9	108589669	108590300		chr18	12773446	12773831
								chr12	105139272	105141419		chr9	112687039	112687762		chr18	12795364	12795992
								chr12	105141938	105142925		chr9	114492700	114493242		chr18	12815058	12815545
								chr12	105305563	105306314		chr9	119214845	119215307		chr18	12945041	12945530
								chr12	105314712	105328938		chr9	119218127	119218854		chr18	13051648	13052099
								chr12	105344756	105345644		chr9	120903209	120903832		chr18	13168607	13168992
								chr12	105576179	105580943		chr9	121291404	121292073		chr18	13201243	13202094
								chr12	105581042	105586283		chr9	121859479	121859936		chr18	14932345	14932764
								chr12	105616366	105617293		chr9	122024189	122025099		chr18	15620310	15620665
								chr12	105623907	105624681		chr9	122034925	122035655		chr18	15649661	15650072
								chr12	105988055	105988839		chrX	4248268	4248815		chr18	16508877	16509345
								chr12	106079362	106080386		chrX	4253120	4253867		chr18	16895031	16895421
								chr12	106101437	106103232		chrX	4666210	4666532		chr18	17781588	17781892
								chr12	106192017	106192745		chrX	14334447	14334979		chr18	20313586	20314149
								chr12	106230742	106231622		chrX	14474475	14474868		chr18	20346355	20346722
								chr12	106237731	106239513		chrX	18660074	18660601		chr18	20360074	20360484
								chr12	106240748	106241415		chrX	20124613	20125474		chr18	20591031	20591274
								chr12	106966176	106966950		chrX	20129311	20129953		chr18	21085789	21086230
								chr12	106995893	106996708		chrX	32100518	32101789		chr18	21231981	21232487
								chr12	109493563	109494211		chrX	34659662	34660073		chr18	21326524	21326911
								chr12	109579635	109580815		chrX	35537742	35538562		chr18	23976147	23976598
								chr12	110030316	110031494		chrX	39397932	39398644		chr18	28439319	28439649
								chr12	110073471	110074629		chrX	45158016	45158418		chr18	28462841	28463132
								chr12	110087577	110097308		chrX	46984158	46984909		chr18	30415371	30415765
								chr12	111036907	111037643		chrX	54886347	54886679		chr18	30910478	30910781
								chr12	111358389	111358969		chrX	57568985	57569635		chr18	32229883	32230454
								chr12	111392345	111393361		chrX	57572199	57572636		chr18	32413212	32413710
								chr12	111394404	111395294		chrX	72979995	72980353		chr18	34392535	34392882
								chr12	111442626	111443351		chrX	96666498	96667244		chr18	35437477	35438116
								chr12	111458341	111459972		chrX	98572153	98572908		chr18	35691647	35692119
								chr12	111462297	111463122		chrX	98839169	98839733		chr18	36278034	36278418
								chr12	111468449	111469568		chrX	100694483	100695226		chr18	36873012	36873430
								chr12	111469834	111471017		chrX	102274709	102275173		chr18	38471653	38472191
								chr12	111482751	111483351		chrX	123299867	123300426		chr18	39164264	39165134
								chr12	111662166	111663040		chrX	137027934	137028646		chr18	39177147	39177515
								chr12	111777749	111778569		chrX	141706400	141706850		chr18	39521644	39522313
								chr12	112103757	112104799		chrX	161489380	161490056		chr18	39601930	39602322
								chr12	112109252	112110029		chrX	163971846	163972422		chr18	39623234	39623496
								chr12	112275215	112276167		chrX	166434749	166436595		chr18	39875328	39875686
								chr12	112610092	112610767						chr18	39986479	39986877
								chr12	112701766	112702583						chr18	43023498	43023909
								chr12	112951096	112951763						chr18	43135422	43135877
								chr12	113028227	113029240						chr18	43409967	43410465
								chr12	113053395	113054264						chr18	43891804	43892202
								chr12	113149033	113150076						chr18	45534946	45535251
								chr12	113181727	113182448						chr18	46614764	46615081
								chr12	113344382	113349036						chr18	46775098	46775693
								chr12	113726337	113727041						chr18	46794678	46795276
								chr12	113825163	113827677						chr18	46964083	46964372
								chr12	113908947	113909694						chr18	47473150	47473448
								chr12	113962319	113963255						chr18	51314880	51315440
								chr12	114469677	114470261						chr18	51324784	51325267
								chr12	118963246	118964066						chr18	51621453	51621960
								chr12	119142911	119143356						chr18	53668346	53668640
								chr12	119480243	119481086						chr18	54284810	54285098
								chr12	119551811	119552430						chr18	54317796	54318136
								chr13	3890484	3891862						chr18	54412502	54413263
								chr13	4055179	4055998						chr18	55201983	55202313
								chr13	4058126	4060229						chr18	55634898	55635221
								chr13	4232558	4233674						chr18	55643086	55643456
								chr13	4387573	4389331						chr18	56517351	56517701
								chr13	4430084	4430850						chr18	57028691	57029109
								chr13	4513679	4514687						chr18	58495448	58495826
								chr13	5802972	5804103						chr18	59126354	59126632
								chr13	8698873	8699731						chr18	59238960	59239353
								chr13	8994690	8996226						chr18	59251083	59251405
								chr13	9056219	9058497						chr18	59251925	59252304
								chr13	9062926	9063900						chr18	59282754	59283161
								chr13	9221791	9222964						chr18	59359408	59359840
								chr13	12238560	12239214						chr18	59377152	59378050
								chr13	12525464	12526819						chr18	60554012	60554442
								chr13	12553233	12554229						chr18	60682874	60683215
								chr13	12642691	12643497						chr18	61708122	61708485
								chr13	14086771	14087799						chr18	62068494	62068994
								chr13	14218713	14219319						chr18	62389558	62390042
								chr13	16103710	16104676						chr18	63278949	63279427
								chr13	16160824	16161509						chr18	64190762	64191080
								chr13	16372300	16373001						chr18	64508550	64509119
								chr13	16407318	16409053						chr18	64542176	64542538
								chr13	18790495	18791243						chr18	64759827	64760231
								chr13	20221930	20223165						chr18	64765749	64766110
								chr13	21314177	21315054						chr18	64814638	64815184
								chr13	21454270	21455121						chr18	64914985	64915328
								chr13	21500061	21500998						chr18	65656615	65657041
								chr13	21973509	21974197						chr18	67376490	67376851
								chr13	23673195	23674480						chr18	68198875	68199334
								chr13	23789187	23790694						chr18	68218632	68218996
								chr13	23824102	23824944						chr18	68386135	68386602
								chr13	23852833	23854043						chr18	70847390	70847746
								chr13	23854104	23854733						chr18	72854960	72855298
								chr13	23898097	23900223						chr18	73409392	73409824
								chr13	23911297	23912976						chr18	74452677	74453062
								chr13	23932430	23933405						chr18	74918166	74918801
								chr13	23960485	23961562						chr18	75250932	75251323
								chr13	24012130	24012902						chr18	75339651	75340007
								chr13	24220393	24220985						chr18	76423619	76423923
								chr13	24466914	24467979						chr18	76465512	76465814
								chr13	24469302	24470929						chr18	77175804	77176393
								chr13	24533879	24534959						chr18	77912663	77913048
								chr13	24907837	24909170						chr18	78659676	78660041
								chr13	24981186	24981968						chr18	80141213	80141698
								chr13	24984159	24984820						chr18	81428628	81429018
								chr13	25022138	25022895						chr18	82357243	82357424
								chr13	28623849	28624684						chr18	84673692	84674076
								chr13	29300547	29301480						chr18	85041057	85041624
								chr13	29713637	29714531						chr18	90394404	90394786
								chr13	30036328	30037525						chr18	90527296	90527605
								chr13	30422888	30423704						chr19	3214853	3215219
								chr13	30424252	30424901						chr19	4024211	4024852
								chr13	30452481	30453371						chr19	6035788	6036418
								chr13	31400865	31401630						chr19	7086860	7087226
								chr13	31420371	31421195						chr19	7519615	7520013
								chr13	31437874	31439374						chr19	7575119	7575584
								chr13	31572852	31573798						chr19	8040944	8041291
								chr13	31638400	31639970						chr19	8505500	8505818
								chr13	31870968	31871790						chr19	8550684	8551064
								chr13	31912407	31913109						chr19	8690821	8691192
								chr13	32496813	32497634						chr19	10076829	10077136
								chr13	32892950	32894613						chr19	10077236	10077857
								chr13	32915817	32917313						chr19	10433595	10433920
								chr13	33854331	33855118						chr19	10898603	10898933
								chr13	34093745	34095075						chr19	11256456	11256760
								chr13	34137154	34138925						chr19	11629238	11629644
								chr13	34168235	34169381						chr19	12712510	12713030
								chr13	34346516	34347572						chr19	12758777	12759128
								chr13	34379181	34380184						chr19	12770654	12771134
								chr13	34381993	34384877						chr19	14333539	14334140
								chr13	34396641	34397425						chr19	14576707	14577076
								chr13	34641909	34642994						chr19	14590897	14591350
								chr13	34826345	34827570						chr19	14814468	14815197
								chr13	34829501	34831586						chr19	17483089	17483504
								chr13	35052892	35054011						chr19	17627945	17628226
								chr13	35067721	35068515						chr19	17855695	17856089
								chr13	35243469	35244260						chr19	18379174	18379620
								chr13	35471361	35472761						chr19	18710936	18711391
								chr13	35730226	35730957						chr19	20626817	20627248
								chr13	36051275	36052276						chr19	20680831	20681277
								chr13	36055236	36056258						chr19	20705556	20705947
								chr13	36442427	36443081						chr19	20728576	20729066
								chr13	36558054	36559042						chr19	20819174	20819610
								chr13	37551508	37552861						chr19	21029384	21029685
								chr13	37629051	37630611						chr19	21404298	21404635
								chr13	37906542	37907476						chr19	21690312	21690697
								chr13	37949126	37951009						chr19	22140749	22141189
								chr13	37994824	37996822						chr19	23099184	23099746
								chr13	38031801	38032950						chr19	23135615	23136178
								chr13	38181158	38182294						chr19	23200232	23200662
								chr13	38214064	38214698						chr19	23363744	23364159
								chr13	38588521	38589218						chr19	23564263	23564645
								chr13	38646189	38647145						chr19	23925915	23926253
								chr13	39495939	39496507						chr19	23950271	23950785
								chr13	40936639	40937500						chr19	25020033	25020345
								chr13	40943268	40943875						chr19	25169500	25170007
								chr13	41290914	41291978						chr19	25476956	25477348
								chr13	41321556	41322618						chr19	26494283	26494669
								chr13	41327494	41328712						chr19	26805568	26805950
								chr13	41498975	41499778						chr19	27250983	27251449
								chr13	41908371	41909138						chr19	27401981	27402477
								chr13	41912562	41913690						chr19	27468644	27469181
								chr13	41922629	41924565						chr19	28595266	28595655
								chr13	42183427	42184282						chr19	28943659	28943934
								chr13	43327111	43328532						chr19	29637086	29637405
								chr13	43399162	43401324						chr19	30113675	30114078
								chr13	43493536	43494546						chr19	30181809	30182239
								chr13	44050009	44051063						chr19	30261724	30262055
								chr13	44160672	44161808						chr19	31183318	31183734
								chr13	44397044	44397729						chr19	31194238	31194569
								chr13	44401449	44402427						chr19	31975126	31975555
								chr13	44434281	44435292						chr19	32625959	32626463
								chr13	44504083	44505188						chr19	33153193	33153919
								chr13	45357164	45357933						chr19	33176214	33176602
								chr13	45998991	45999677						chr19	33223733	33224181
								chr13	46114764	46115776						chr19	34170774	34171107
								chr13	46115943	46117087						chr19	34277907	34278258
								chr13	46118529	46119723						chr19	37516893	37517689
								chr13	46248533	46249203						chr19	37567574	37568399
								chr13	46389589	46390433						chr19	37856817	37857229
								chr13	46714910	46716011						chr19	37934737	37935163
								chr13	46823019	46824072						chr19	37935637	37936113
								chr13	46970432	46971171						chr19	39183060	39183376
								chr13	47277876	47279627						chr19	39287143	39287802
								chr13	47295108	47296237						chr19	39304132	39304476
								chr13	47297341	47298220						chr19	39421451	39421890
								chr13	47341401	47343851						chr19	39538321	39538903
								chr13	47345748	47346759						chr19	39584063	39584472
								chr13	48640744	48642044						chr19	39750010	39750352
								chr13	48973046	48974607						chr19	39836299	39836683
								chr13	49006124	49007358						chr19	39911838	39912278
								chr13	49285081	49287203						chr19	39984196	39985292
								chr13	50910952	50911453						chr19	39986461	39987435
								chr13	51168136	51168750						chr19	39998134	39998575
								chr13	51194810	51196131						chr19	40063916	40064439
								chr13	51966332	51966984						chr19	40148178	40148708
								chr13	52116930	52118481						chr19	40261592	40262080
								chr13	52163234	52164177						chr19	40611049	40611373
								chr13	52248243	52250035						chr19	40615540	40615876
								chr13	52806612	52807780						chr19	41349987	41350808
								chr13	52861350	52862302						chr19	41913412	41913833
								chr13	52915059	52915827						chr19	42604321	42604771
								chr13	52927660	52929091						chr19	42636589	42636960
								chr13	53069793	53070711						chr19	43655627	43656094
								chr13	53074524	53077856						chr19	43842494	43842974
								chr13	53163040	53163947						chr19	43969184	43969740
								chr13	54344196	54344931						chr19	45473243	45473585
								chr13	54526401	54527135						chr19	46088992	46089378
								chr13	54683883	54685054						chr19	46173950	46174983
								chr13	54765760	54766609						chr19	46179487	46179892
								chr13	54771619	54772438						chr19	46529320	46529805
								chr13	54929232	54930040						chr19	47127929	47128338
								chr13	55477747	55478313						chr19	47428207	47428480
								chr13	55519131	55520328						chr19	49434694	49435229
								chr13	55530375	55531366						chr19	49447447	49447770
								chr13	55545657	55547312						chr19	49450265	49450791
								chr13	55911948	55913013						chr19	50929353	50929764
								chr13	56454198	56455742						chr19	53102394	53102836
								chr13	56706730	56707709						chr19	53159130	53159632
								chr13	57674670	57675442						chr19	54145655	54146053
								chr13	57776128	57776835						chr19	55222571	55223093
								chr13	58309450	58310220						chr19	55224491	55225103
								chr13	59014795	59016398						chr19	55241140	55241761
								chr13	59061271	59062272						chr19	55498427	55498803
								chr13	59508347	59509322						chr19	55670499	55670861
								chr13	59581723	59582942						chr19	57287943	57288321
								chr13	59637835	59638589						chr19	57564052	57564476
								chr13	60211556	60212507						chr19	57728182	57728547
								chr13	60255339	60256557						chr19	58085725	58086094
								chr13	60586984	60588015						chr19	58124837	58125205
								chr13	60598572	60599707						chr19	58165368	58165728
								chr13	60674705	60676287						chr19	58447552	58448008
								chr13	60702673	60703720						chr19	58483523	58483948
								chr13	60703780	60705126						chr19	58607530	58607967
								chr13	60788185	60789014						chr19	59140355	59140726
								chr13	60837469	60838585						chr19	59445653	59446055
								chr13	63359030	63359916						chr19	59749453	59749836
								chr13	63424837	63426155						chr19	60665478	60665897
								chr13	63427196	63428000						chr19	61127072	61127467
								chr13	63665665	63666845						chr19	61214506	61214965
								chr13	64206659	64207886						chr2	3273533	3273959
								chr13	64415063	64415965						chr2	3332931	3333338
								chr13	67005752	67006685						chr2	3496695	3497107
								chr13	67369748	67370562						chr2	3589647	3590885
								chr13	67433018	67433942						chr2	3613202	3613654
								chr13	67584530	67585458						chr2	4917280	4917977
								chr13	67829724	67830478						chr2	5207346	5207697
								chr13	69660918	69661698						chr2	5857577	5857933
								chr13	69715586	69716851						chr2	6088877	6089291
								chr13	69776286	69777654						chr2	6567454	6567805
								chr13	69778899	69780086						chr2	6938451	6938799
								chr13	69780519	69781564						chr2	7181667	7182238
								chr13	69782995	69784292						chr2	7190091	7190455
								chr13	70102001	70102769						chr2	7491024	7491415
								chr13	70728858	70729846						chr2	8889904	8890372
								chr13	70901369	70902096						chr2	10049068	10049494
								chr13	70969784	70970571						chr2	10595388	10595819
								chr13	71142181	71143283						chr2	12801050	12801550
								chr13	73740919	73741798						chr2	14051731	14052106
								chr13	73790537	73791349						chr2	14992097	14992538
								chr13	73905072	73905732						chr2	17278518	17278865
								chr13	73907162	73907938						chr2	17511279	17511668
								chr13	73909915	73911913						chr2	18285986	18286498
								chr13	74202219	74202885						chr2	18363558	18363962
								chr13	75480506	75481419						chr2	19569125	19569602
								chr13	75789999	75791114						chr2	20868395	20868966
								chr13	75917076	75918308						chr2	22519199	22519680
								chr13	75935083	75935860						chr2	22881243	22881520
								chr13	76235401	76236385						chr2	22931329	22931846
								chr13	81149132	81149899						chr2	22933247	22933681
								chr13	81454771	81456076						chr2	23874501	23874901
								chr13	89849150	89850054						chr2	23898317	23899075
								chr13	89922143	89923182						chr2	26739682	26740074
								chr13	91348139	91348916						chr2	28490647	28491096
								chr13	91363087	91364079						chr2	28737509	28738550
								chr13	91887600	91888763						chr2	28861673	28862100
								chr13	93303547	93304409						chr2	33904259	33904836
								chr13	93961829	93962938						chr2	33995769	33996126
								chr13	94198358	94199599						chr2	34003671	34004183
								chr13	94269635	94270624						chr2	34341572	34342055
								chr13	94418330	94419301						chr2	34382593	34383075
								chr13	94423220	94423910						chr2	34400123	34400628
								chr13	94677813	94678418						chr2	34919238	34919588
								chr13	95027392	95028169						chr2	34924710	34925210
								chr13	95068065	95068899						chr2	35813238	35813622
								chr13	95168144	95169667						chr2	36098729	36099674
								chr13	96551749	96552383						chr2	37900872	37901189
								chr13	96625073	96625905						chr2	37943856	37944253
								chr13	96628939	96629867						chr2	38000299	38000646
								chr13	96656978	96657820						chr2	38117268	38117615
								chr13	96679937	96680693						chr2	38630540	38630964
								chr13	97340454	97341263						chr2	38639784	38640324
								chr13	97363411	97364007						chr2	38981637	38981912
								chr13	97439872	97441069						chr2	39066243	39066660
								chr13	97907361	97908345						chr2	40288285	40288701
								chr13	97974902	97975924						chr2	40300075	40300353
								chr13	98177477	98178237						chr2	41894721	41895154
								chr13	98213166	98214402						chr2	43078196	43078573
								chr13	99584879	99585942						chr2	43101369	43101788
								chr13	99862072	99862817						chr2	43335293	43335815
								chr13	100113705	100114980						chr2	45312339	45312769
								chr13	100139419	100140214						chr2	45319415	45320385
								chr13	101302503	101303804						chr2	45694453	45694822
								chr13	101314138	101314833						chr2	48945275	48946729
								chr13	101612551	101613780						chr2	49326644	49327019
								chr13	102120894	102121700						chr2	49377022	49377874
								chr13	102141549	102142498						chr2	49378089	49378469
								chr13	102523305	102524408						chr2	49397176	49397513
								chr13	102532466	102533339						chr2	50194534	50194872
								chr13	102533547	102534544						chr2	50733219	50733623
								chr13	102547269	102548021						chr2	50736988	50737575
								chr13	102617864	102618745						chr2	50837932	50838552
								chr13	102631434	102632499						chr2	50911640	50912217
								chr13	102793420	102794149						chr2	51855283	51855449
								chr13	104283424	104284173						chr2	52360170	52360671
								chr13	104289205	104290080						chr2	54410661	54411239
								chr13	104379604	104380307						chr2	56979659	56980382
								chr13	104962437	104963354						chr2	59086852	59087357
								chr13	105429004	105429803						chr2	59289656	59290075
								chr13	105430687	105431780						chr2	60420864	60421191
								chr13	107726421	107727298						chr2	62765398	62765629
								chr13	108621194	108622092						chr2	63348492	63348871
								chr13	108647003	108647771						chr2	63670245	63670593
								chr13	108652912	108654139						chr2	63699477	63700586
								chr13	108681039	108682250						chr2	63917366	63917633
								chr13	108712819	108713981						chr2	63935299	63935674
								chr13	108860158	108861068						chr2	63971616	63972097
								chr13	109831813	109832913						chr2	64278979	64279475
								chr13	110371318	110372789						chr2	64281263	64281620
								chr13	110425954	110426827						chr2	64921452	64921816
								chr13	110711392	110712106						chr2	65386667	65387147
								chr13	112116121	112116887						chr2	67549534	67550059
								chr13	113106597	113107980						chr2	67561447	67561796
								chr13	113290014	113291156						chr2	67725715	67726113
								chr13	113319863	113320742						chr2	67821588	67822108
								chr13	114391747	114392546						chr2	69750892	69751223
								chr13	114393056	114394205						chr2	70511830	70512205
								chr13	114405415	114407261						chr2	70614805	70615153
								chr13	115628322	115629335						chr2	70800191	70800577
								chr13	115738859	115739563						chr2	71913090	71913677
								chr13	120196933	120198710						chr2	71994591	71995038
								chr14	8657088	8658111						chr2	72724280	72724667
								chr14	8784961	8786012						chr2	72803530	72803901
								chr14	8806978	8807795						chr2	73163876	73164437
								chr14	8871363	8872247						chr2	75460143	75460565
								chr14	9075911	9077476						chr2	75588900	75589337
								chr14	9136262	9137130						chr2	75624139	75624507
								chr14	10420242	10420975						chr2	77456719	77457075
								chr14	10439324	10440093						chr2	79816097	79816470
								chr14	11346252	11347000						chr2	80140911	80141490
								chr14	11463868	11464570						chr2	81110775	81111682
								chr14	12091103	12091728						chr2	85092943	85093484
								chr14	12355484	12356219						chr2	86679531	86679792
								chr14	12410787	12411842						chr2	91477041	91477507
								chr14	12440670	12441444						chr2	93589806	93590195
								chr14	12607592	12608283						chr2	93906228	93906637
								chr14	12697855	12698921						chr2	93986174	93986600
								chr14	12726465	12727289						chr2	100799610	100799975
								chr14	12936580	12937979						chr2	101791042	101791392
								chr14	12944712	12945684						chr2	103044947	103045603
								chr14	17196386	17197838						chr2	103268506	103268916
								chr14	17197889	17199286						chr2	104374775	104375231
								chr14	17402386	17403119						chr2	104445610	104446055
								chr14	18513490	18514670						chr2	104542271	104543014
								chr14	18732083	18733109						chr2	104879580	104880006
								chr14	19070450	19072532						chr2	107465826	107466119
								chr14	19795393	19797310						chr2	107786072	107786431
								chr14	21526160	21527041						chr2	107804888	107805388
								chr14	21915364	21916566						chr2	109302374	109302729
								chr14	21929584	21930786						chr2	109327712	109328101
								chr14	21946381	21947276						chr2	109336206	109336456
								chr14	22097403	22098739						chr2	109524081	109524413
								chr14	22130988	22131833						chr2	109588638	109589215
								chr14	22253691	22254777						chr2	109590585	109590984
								chr14	22576617	22577408						chr2	109767115	109767516
								chr14	23452542	23453294						chr2	109772648	109773057
								chr14	23619952	23620811						chr2	109800388	109800818
								chr14	26027341	26029212						chr2	109845361	109845714
								chr14	26270280	26272532						chr2	110032420	110032940
								chr14	26300159	26301375						chr2	110159385	110159728
								chr14	26308591	26309538						chr2	113374652	113374974
								chr14	26312934	26314086						chr2	113925499	113926049
								chr14	26324347	26325252						chr2	114099945	114100932
								chr14	26327742	26330104						chr2	114600069	114600399
								chr14	26352281	26353923						chr2	114614008	114614376
								chr14	26359533	26360838						chr2	115075657	115076126
								chr14	26528795	26530545						chr2	115345823	115346877
								chr14	26544394	26545015						chr2	115758935	115759352
								chr14	26592310	26594212						chr2	116729788	116730224
								chr14	27832733	27833592						chr2	116810307	116810792
								chr14	28108939	28109736						chr2	116954804	116955344
								chr14	28110099	28110734						chr2	117630441	117630837
								chr14	28288438	28289322						chr2	119263735	119264053
								chr14	28495294	28496455						chr2	121967018	121967535
								chr14	29099634	29100256						chr2	122067617	122068156
								chr14	29462350	29463576						chr2	126221637	126221965
								chr14	30789578	30790830						chr2	126363340	126363712
								chr14	30808610	30810044						chr2	126754363	126754868
								chr14	31074635	31075431						chr2	128126647	128126968
								chr14	31124277	31125355						chr2	129352047	129352484
								chr14	31674754	31675432						chr2	129541532	129541844
								chr14	31681754	31683032						chr2	130640313	130640709
								chr14	31756021	31758872						chr2	131461119	131461442
								chr14	31762984	31763808						chr2	131502463	131502841
								chr14	31763919	31765011						chr2	132508077	132508842
								chr14	31814322	31815297						chr2	132599703	132600105
								chr14	31928480	31929264						chr2	133475821	133476169
								chr14	32063820	32065003						chr2	133594264	133594674
								chr14	32149251	32150580						chr2	134539014	134539308
								chr14	32452094	32455796						chr2	134757529	134757894
								chr14	32457453	32458770						chr2	136887846	136888397
								chr14	32978491	32979487						chr2	139614504	139614948
								chr14	33895392	33896165						chr2	141020339	141020711
								chr14	35112050	35112856						chr2	141114115	141114463
								chr14	35158854	35160089						chr2	142638824	142639172
								chr14	35161166	35162943						chr2	142663382	142664531
								chr14	35164393	35165426						chr2	143492482	143492943
								chr14	35170548	35171963						chr2	143899833	143900397
								chr14	35210725	35211662						chr2	143917991	143918418
								chr14	35433647	35434492						chr2	144214219	144214662
								chr14	37784110	37785197						chr2	145502156	145502738
								chr14	40005289	40006401						chr2	146240312	146240722
								chr14	41737639	41738575						chr2	146255157	146255695
								chr14	41909300	41910242						chr2	146331042	146331405
								chr14	41953836	41954672						chr2	147757409	147758099
								chr14	45948290	45949935						chr2	147787322	147787700
								chr14	45984081	45984920						chr2	147849891	147850386
								chr14	46005899	46009269						chr2	147911298	147911576
								chr14	46134863	46135489						chr2	148820921	148821321
								chr14	46142774	46143653						chr2	148830460	148830998
								chr14	46319692	46320456						chr2	149427833	149428199
								chr14	46635151	46635983						chr2	152063653	152064178
								chr14	47019475	47020179						chr2	153380312	153380885
								chr14	47500250	47501110						chr2	155499374	155499679
								chr14	47804129	47804969						chr2	155917688	155918045
								chr14	47810048	47810765						chr2	156841492	156841833
								chr14	47816281	47817049						chr2	157375981	157376401
								chr14	47839832	47840516						chr2	159656328	159656649
								chr14	47896174	47897137						chr2	160490167	160490577
								chr14	48874689	48875369						chr2	160540754	160541068
								chr14	49328164	49329524						chr2	160695174	160695571
								chr14	50976190	50976941						chr2	161767679	161768149
								chr14	51515307	51516992						chr2	162538087	162538486
								chr14	51544108	51545228						chr2	162921477	162921967
								chr14	51617454	51618416						chr2	162926237	162926732
								chr14	51628872	51629802						chr2	163135877	163136337
								chr14	51708203	51711555						chr2	164058553	164058882
								chr14	51719620	51721806						chr2	164831923	164833051
								chr14	52521279	52524507						chr2	164844617	164845144
								chr14	52530908	52534535						chr2	164858114	164858486
								chr14	52548718	52550932						chr2	165747486	165748042
								chr14	52641709	52643414						chr2	166018474	166018972
								chr14	52877149	52878105						chr2	167608873	167609248
								chr14	54868755	54869733						chr2	168357462	168358053
								chr14	55050110	55051428						chr2	168900723	168901165
								chr14	55195880	55197308						chr2	169215734	169216208
								chr14	55511492	55513199						chr2	169958242	169958606
								chr14	55633205	55634844						chr2	170350500	170350865
								chr14	55698051	55698922						chr2	174758248	174758648
								chr14	55771564	55772438						chr2	178396825	178397875
								chr14	56184008	56185473						chr2	178411705	178412311
								chr14	56185692	56187105						chr2	178623433	178623806
								chr14	56222511	56223653						chr2	178995528	178996057
								chr14	56290403	56291681						chr2	180085458	180085776
								chr14	57374103	57374868						chr2	180924010	180924452
								chr14	57431257	57432374						chr2	180983944	180984431
								chr14	57503888	57504606						chr3	4866298	4866671
								chr14	57707742	57709603						chr3	5396209	5396568
								chr14	59379664	59380600						chr3	7461415	7461813
								chr14	60062577	60063368						chr3	10285907	10286316
								chr14	61267514	61268218						chr3	10294368	10294800
								chr14	61274523	61276051						chr3	11357383	11357834
								chr14	61281896	61282907						chr3	13435389	13435720
								chr14	61594312	61595711						chr3	14699493	14699878
								chr14	61615044	61615899						chr3	14725488	14725885
								chr14	61664473	61665369						chr3	14783166	14783594
								chr14	61972751	61973694						chr3	14839553	14839860
								chr14	62304615	62305452						chr3	14874381	14874791
								chr14	62675844	62676605						chr3	15219293	15219617
								chr14	62868081	62868656						chr3	15264536	15264857
								chr14	62980125	62980958						chr3	15329490	15329972
								chr14	63087368	63088279						chr3	18039837	18040390
								chr14	63124854	63126001						chr3	18151008	18151518
								chr14	63450314	63451501						chr3	18195986	18196442
								chr14	63736165	63737017						chr3	18198655	18199194
								chr14	63768654	63769874						chr3	18243155	18243490
								chr14	63782832	63784183						chr3	18328823	18329318
								chr14	63796127	63797396						chr3	18360355	18360772
								chr14	63830766	63831673						chr3	18361067	18361427
								chr14	63863368	63865306						chr3	18835413	18835850
								chr14	64777037	64778349						chr3	19094428	19094724
								chr14	64812238	64813290						chr3	19145685	19146012
								chr14	65064487	65065208						chr3	19161046	19161370
								chr14	65250855	65252471						chr3	19862756	19863261
								chr14	65470128	65471115						chr3	21395193	21395580
								chr14	65961832	65963507						chr3	21546353	21546783
								chr14	65976035	65979543						chr3	22079872	22080320
								chr14	65997050	65998052						chr3	23638949	23639476
								chr14	66492065	66492621						chr3	23864221	23864486
								chr14	66508320	66510414						chr3	24820196	24820703
								chr14	66737043	66738287						chr3	24916598	24916987
								chr14	66765979	66766822						chr3	26283708	26284133
								chr14	69764390	69765072						chr3	29631518	29632066
								chr14	69770377	69771294						chr3	30152733	30153046
								chr14	69792654	69793449						chr3	30260159	30260523
								chr14	69887523	69888342						chr3	30875934	30876293
								chr14	70028295	70029075						chr3	31275006	31275349
								chr14	70081941	70083276						chr3	32391695	32392052
								chr14	70508208	70509033						chr3	33974950	33975299
								chr14	70735858	70737416						chr3	34377419	34377901
								chr14	70740771	70742608						chr3	34652475	34652840
								chr14	70750586	70751536						chr3	35783813	35784282
								chr14	70900051	70901126						chr3	35789811	35790817
								chr14	70905323	70906721						chr3	37787300	37787857
								chr14	70908287	70909560						chr3	37833716	37834122
								chr14	70914952	70916109						chr3	40490085	40490477
								chr14	70940492	70941582						chr3	40568780	40569150
								chr14	73002268	73003363						chr3	40792041	40792664
								chr14	73108863	73110646						chr3	40799012	40799515
								chr14	73394049	73394640						chr3	40821874	40822522
								chr14	73529943	73531215						chr3	40938714	40939032
								chr14	73571752	73573089						chr3	41293422	41294006
								chr14	73578905	73579822						chr3	43858597	43859061
								chr14	73952005	73952838						chr3	47214053	47214411
								chr14	74029943	74030824						chr3	50963130	50963477
								chr14	74031074	74031969						chr3	51551357	51551771
								chr14	74032176	74033156						chr3	52094506	52095246
								chr14	75128831	75129558						chr3	52173775	52174245
								chr14	75550324	75551200						chr3	52341062	52341622
								chr14	75632641	75633334						chr3	52366350	52366621
								chr14	75737270	75738194						chr3	52655788	52656084
								chr14	76185893	76187415						chr3	54321002	54321608
								chr14	76189945	76190922						chr3	54326694	54326949
								chr14	76219636	76220605						chr3	55817804	55818190
								chr14	76226473	76227266						chr3	56528444	56528797
								chr14	76549433	76550154						chr3	57104084	57104610
								chr14	76965838	76966610						chr3	57963331	57963747
								chr14	76966939	76967827						chr3	58784449	58784932
								chr14	77014283	77015501						chr3	59120005	59120364
								chr14	77114195	77114992						chr3	59943136	59943523
								chr14	77116756	77117396						chr3	60374299	60374638
								chr14	77178435	77179255						chr3	60412809	60413296
								chr14	77197032	77197977						chr3	60524209	60524600
								chr14	77216887	77218630						chr3	60893484	60894299
								chr14	77228326	77229228						chr3	63053182	63053474
								chr14	77279567	77280390						chr3	63842038	63842490
								chr14	77282206	77282978						chr3	65792493	65793703
								chr14	77434000	77434862						chr3	66169288	66169744
								chr14	77985840	77986487						chr3	66380516	66380922
								chr14	78782892	78783860						chr3	66392156	66392422
								chr14	79285883	79286895						chr3	67237919	67238327
								chr14	79296004	79296545						chr3	67387760	67388088
								chr14	79886354	79888059						chr3	68066221	68066633
								chr14	79889857	79890641						chr3	68568753	68569928
								chr14	80028688	80029416						chr3	69347736	69348035
								chr14	87269341	87270037						chr3	73511376	73511761
								chr14	93474769	93475606						chr3	75567330	75567673
								chr14	99262367	99263552						chr3	77581309	77582299
								chr14	100599087	100600064						chr3	77748743	77749034
								chr14	100684442	100686270						chr3	78890165	78890577
								chr14	100723273	100724031						chr3	78962048	78962472
								chr14	100751895	100752631						chr3	79531109	79531459
								chr14	100857949	100858754						chr3	80088556	80088997
								chr14	105523603	105524396						chr3	80089045	80089549
								chr14	105652717	105653689						chr3	81037431	81037855
								chr14	105699514	105700273						chr3	81238955	81239277
								chr14	115451531	115452292						chr3	82069863	82070357
[truncated: 4,436 more rows]

## Sheet: 7E_HistoneMarks_Male_sites
Supplementary File 7E - Coordinates for each of the sex-biased chromatin mark regions in male liver defined in sheet 7A. Shown is the chromosome, start, and end coordinates for each of the sites indicated (formatted as a 3-column BED file).
Name of genomic sites	Number of sites			Name of genomic sites	Number of sites			Name of genomic sites	Number of sites			Name of genomic sites	Number of sites			Name of genomic sites	Number of sites			Name of genomic sites	Number of sites
K27ac (Male)	713			K4me1 (Male)	6098			K4me3 (Male)	714			K9me3 (Male)	372			K27me3 (Male)	160			K36me3 (Male)	142
chrom	chromStart	chromEnd		chrom	chromStart	chromEnd		chrom	chromStart	chromEnd		chrom	chromStart	chromEnd		chrom	chromStart	chromEnd		chrom	chromStart	chromEnd
chr1	5301236	5303323		chr1	3505166	3506067		chr1	13658422	13661563		chr1	33797600	33806399		chr1	4655200	4664799		chr1	21275400	21283799
chr1	6499282	6501899		chr1	3561339	3562160		chr1	27940524	27942683		chr1	42333600	42340399		chr1	50723200	50755999		chr1	62532800	62534799
chr1	10145336	10147914		chr1	4666289	4666944		chr1	30839837	30841342		chr1	48938000	48939199		chr1	85336800	85343199		chr1	74991200	74995199
chr1	21292733	21298823		chr1	4866816	4868561		chr1	40281466	40286020		chr1	74949200	74962399		chr1	145395600	145425599		chr1	79456200	79458799
chr1	21304732	21309383		chr1	4870668	4871353		chr1	46908763	46910408		chr1	91784800	91792399		chr1	162286400	162312799		chr1	141546600	141547199
chr1	21322598	21325013		chr1	5122896	5126189		chr1	55960310	55960883		chr1	91964000	91970399		chr1	164822400	164900399		chr1	176738600	176743199
chr1	33131357	33133157		chr1	5130584	5131368		chr1	57447396	57448690		chr1	93238400	93252399		chr1	164905200	164927999		chr10	3173400	3177599
chr1	33153771	33156092		chr1	5164318	5165203		chr1	59269159	59269958		chr1	136199600	136201199		chr1	164931200	164941199		chr10	25498000	25499399
chr1	36084180	36085036		chr1	5301182	5302962		chr1	59443254	59446223		chr1	170128000	170135999		chr1	170297600	170319999		chr10	94466600	94469199
chr1	45312589	45314082		chr1	5306991	5307752		chr1	67161680	67163297		chr1	189165200	189176799		chr1	175752800	175762799		chr10	118688800	118691399
chr1	55755859	55757746		chr1	6563718	6564298		chr1	67359180	67359875		chr10	7170800	7176799		chr10	30004000	30014799		chr10	118724600	118725999
chr1	58124914	58139384		chr1	7124202	7124903		chr1	74995367	74998162		chr10	21993600	22032399		chr10	33473600	33492399		chr11	54651800	54656399
chr1	58142001	58144340		chr1	7142201	7143725		chr1	81741705	81742250		chr10	22048800	22072799		chr10	33496800	33541199		chr11	54658400	54665399
chr1	58145399	58151378		chr1	8044246	8045769		chr1	87935334	87937988		chr10	42847200	42851999		chr10	33570400	33601599		chr11	81799000	81803999
chr1	59208149	59210139		chr1	8405792	8408137		chr1	90006175	90007426		chr10	69588400	69676399		chr10	33624000	33637599		chr11	81806600	81809399
chr1	64735633	64737354		chr1	8485907	8486706		chr1	93339145	93341664		chr10	76172000	76195599		chr10	86826800	86837599		chr12	20236000	20239799
chr1	74995021	74998920		chr1	8768464	8769064		chr1	99872640	99873424		chr10	79277600	79292799		chr10	105254000	105277199		chr12	112312000	112313199
chr1	84295632	84297230		chr1	8897343	8898536		chr1	132553797	132558626		chr10	79323600	79340399		chr10	106451200	106475199		chr13	58857200	58861999
chr1	88914198	88927119		chr1	8900393	8901795		chr1	134108656	134109296		chr10	80318400	80331199		chr10	123271600	123278799		chr13	81248000	81249599
chr1	88927873	88931288		chr1	8914055	8915099		chr1	138523596	138524907		chr10	80536800	80544399		chr11	29638400	29741599		chr13	81456000	81459999
chr1	88936461	88938257		chr1	9721443	9722731		chr1	138524948	138526738		chr10	80947200	80962399		chr12	55537600	55559199		chr13	92095600	92100199
chr1	90660117	90661222		chr1	9722966	9723685		chr1	141447473	141449293		chr10	97261200	97271599		chr12	63372000	63376799		chr13	104326200	104330599
chr1	90757440	90758580		chr1	9804399	9806433		chr1	141453656	141457480		chr10	111092400	111104399		chr13	110505200	110523999		chr13	104384400	104387199
chr1	95604748	95610842		chr1	10127131	10128322		chr1	141751038	141756334		chr10	116460000	116468799		chr14	43951600	43957999		chr14	12085600	12095799
chr1	102108717	102109742		chr1	10145304	10149433		chr1	142077334	142080639		chr10	120304000	120313999		chr14	44048800	44077999		chr14	28948600	28950199
chr1	102550201	102553644		chr1	10195978	10196568		chr1	152155227	152156297		chr10	127827600	127839199		chr14	114748000	114758799		chr14	66263600	66267599
chr1	102595260	102596342		chr1	10199976	10200814		chr1	152981659	152983130		chr11	5870000	5878799		chr15	17360400	17371199		chr14	66288800	66290399
chr1	104457220	104457972		chr1	10203647	10204524		chr1	155328045	155329618		chr11	5896800	5901599		chr15	44497600	44527199		chr14	66291400	66293799
chr1	104630749	104633102		chr1	10246133	10247917		chr1	155331588	155333088		chr11	56382800	56386399		chr15	44530000	44553999		chr14	66297000	66304199
chr1	106937083	106939208		chr1	10624588	10625305		chr1	159183497	159185021		chr11	60290000	60324799		chr15	44561200	44600799		chr14	66307000	66314999
chr1	109888214	109889505		chr1	11023297	11025276		chr1	175842003	175843212		chr11	61516000	61527999		chr15	44681200	44691999		chr14	66317000	66320599
chr1	115091109	115092195		chr1	12865262	12866252		chr1	179188479	179189570		chr11	66905600	66920799		chr15	60709600	60762799		chr14	66324600	66327599
chr1	120708241	120710013		chr1	13705454	13706860		chr1	179726801	179727751		chr11	69852400	69861599		chr15	60931600	60950399		chr14	66328800	66332799
chr1	128196611	128199404		chr1	13796315	13798317		chr1	179912608	179914004		chr11	76131200	76143999		chr15	72970400	73012799		chr14	66367200	66370399
chr1	128941476	128944090		chr1	15805249	15808823		chr1	180116681	180117721		chr11	77275600	77286799		chr15	83985200	84019599		chr14	66380800	66384199
chr1	135404020	135405870		chr1	16212944	16214265		chr1	181340050	181340906		chr11	80694000	80698799		chr15	91013600	91043599		chr15	4678200	4691799
chr1	141466331	141469024		chr1	16261276	16262876		chr1	184515334	184516176		chr11	81068800	81071199		chr16	3632800	3664799		chr15	4697200	4713599
chr1	149212974	149213850		chr1	16386965	16388060		chr1	184693565	184695583		chr11	87104800	87107599		chr16	4823200	4825999		chr15	4714600	4718999
chr1	149246935	149248332		chr1	16560581	16562054		chr1	191953641	191954746		chr11	88155600	88163599		chr16	15539200	15549999		chr15	4729200	4764999
chr1	155765296	155766716		chr1	16576331	16577672		chr10	4750610	4751405		chr11	89924800	89933199		chr16	46798400	46804399		chr15	10665400	10667599
chr1	156000260	156002116		chr1	20059277	20060585		chr10	4921803	4923104		chr11	91584000	91594399		chr16	56815600	56859599		chr15	98552800	98555999
chr1	165102695	165104264		chr1	20084089	20085499		chr10	18086028	18087190		chr11	91824400	91833599		chr16	56863200	56875199		chr16	13668600	13670999
chr1	184504027	184505739		chr1	21093993	21094880		chr10	19928185	19928805		chr11	98232000	98242799		chr16	81665600	81682799		chr17	22351600	22354399
chr1	184531838	184533702		chr1	21122560	21123797		chr10	24554996	24556890		chr11	105186800	105204399		chr17	3004800	3039199		chr17	30811600	30812799
chr1	184687782	184688802		chr1	21305277	21309271		chr10	24560967	24563359		chr11	109149600	109159599		chr17	36617600	36622399		chr17	34944400	34945599
chr1	190476024	190477780		chr1	21310149	21311493		chr10	26578361	26579385		chr11	112832400	112838799		chr17	74348000	74358799		chr17	44177000	44185799
chr1	191898514	191901357		chr1	21311586	21312353		chr10	32032575	32033811		chr11	113146000	113154799		chr18	6999200	7007999		chr17	49395600	49398199
chr1	197046767	197050264		chr1	21312525	21317007		chr10	42583082	42584162		chr11	113482800	113489999		chr18	10432000	10439999		chr17	49414000	49416999
chr1	197055563	197058079		chr1	21317113	21319721		chr10	44147010	44148065		chr11	114599600	114614399		chr18	10442800	10459199		chr17	65153000	65155399
chr10	10143752	10146691		chr1	21323160	21324243		chr10	46850057	46850565		chr11	115738400	115749999		chr18	28186400	28191999		chr17	70864600	70868799
chr10	16991871	16994487		chr1	22125198	22127029		chr10	50482399	50484665		chr11	116203600	116212799		chr18	32743600	32761199		chr18	9676800	9679999
chr10	17270822	17273552		chr1	22601510	22602671		chr10	60600471	60603172		chr11	116498800	116517599		chr18	79198800	79225999		chr18	12653800	12656399
chr10	18082350	18092835		chr1	22917284	22919667		chr10	67590744	67591968		chr11	116978800	116996399		chr18	82390000	82391199		chr18	12694800	12702199
chr10	18118149	18122066		chr1	23243726	23245898		chr10	67991317	67996227		chr11	117902000	117989199		chr18	85876400	85905599		chr18	12718600	12744999
chr10	18805481	18808663		chr1	23296852	23298093		chr10	69462863	69463541		chr11	118869200	118881199		chr19	7797600	7807599		chr18	12802400	12823999
chr10	19952494	19954964		chr1	23321188	23322067		chr10	69477773	69478491		chr11	119440400	119447999		chr19	7853600	7880399		chr18	31772400	31775799
chr10	20195409	20199845		chr1	23330722	23331353		chr10	70639598	70640828		chr11	119756000	119759599		chr19	7900000	7909999		chr18	31778200	31793599
chr10	20222657	20224748		chr1	23912578	23913821		chr10	70642977	70645735		chr11	120027600	120044799		chr19	7922000	7942399		chr18	74530600	74533399
chr10	21384646	21386119		chr1	23929207	23930104		chr10	78530364	78531681		chr12	59502800	59509999		chr19	7948000	7960399		chr18	76015800	76018799
chr10	24189305	24193492		chr1	24134631	24135609		chr10	81459959	81460675		chr12	72894800	72905199		chr19	7996400	8007599		chr19	8134400	8144199
chr10	28763560	28765046		chr1	24141538	24142179		chr10	81616155	81617638		chr12	85113600	85125599		chr19	8023200	8044799		chr19	8145200	8153999
chr10	28777561	28779094		chr1	27947031	27948152		chr10	81687762	81689484		chr12	88343600	88353199		chr19	8290400	8308399		chr19	8155200	8159799
chr10	47370904	47375785		chr1	29546530	29547190		chr10	81838936	81839868		chr12	88389200	88401199		chr19	8325600	8341199		chr19	8189000	8191999
chr10	58623454	58625480		chr1	30963144	30964457		chr10	81866221	81867235		chr12	93110400	93123599		chr19	18438800	18449199		chr19	29769000	29770999
chr10	67541590	67543130		chr1	31003337	31005207		chr10	86989582	86990450		chr12	102159600	102163599		chr19	27396800	27419599		chr19	39324400	39329199
chr10	76056550	76058196		chr1	31048437	31049683		chr10	89092061	89094915		chr12	107318800	107324399		chr19	39556800	39563599		chr19	46207200	46210199
chr10	76060315	76061946		chr1	31131152	31131934		chr10	92535549	92536915		chr12	110662800	110670799		chr19	39574400	39590799		chr19	56171400	56174399
chr10	80433063	80436222		chr1	31393416	31394118		chr10	106752544	106753429		chr12	110696800	110702399		chr19	39608400	39615199		chr19	57630000	57632599
chr10	82786322	82790953		chr1	33154787	33155992		chr10	106760076	106761117		chr12	111487200	111503999		chr19	39619600	39647599		chr2	67976800	67978399
chr10	82799704	82800971		chr1	33270579	33272345		chr10	108573727	108574861		chr12	113268800	113277999		chr19	39878800	39892799		chr2	77707600	77790199
chr10	86490777	86499297		chr1	33322415	33323120		chr10	117008168	117009070		chr12	113394800	113420399		chr19	39932800	39947599		chr2	77797000	77801999
chr10	89055419	89060010		chr1	33633900	33634645		chr10	118170289	118171131		chr12	113426400	113439199		chr19	39950800	39970799		chr2	77808000	77835799
chr10	92537468	92539887		chr1	35765177	35765984		chr10	118190107	118191133		chr12	113692400	113709599		chr19	39975200	39983999		chr2	77842000	77850999
chr10	98610944	98613529		chr1	36082507	36084560		chr10	119529260	119530574		chr13	55849600	55869199		chr19	39994000	40010399		chr2	77857800	77866199
chr10	106788357	106796972		chr1	37930784	37931556		chr10	120925150	120928359		chr13	56898800	56905999		chr19	40016000	40021599		chr2	83695200	83701399
chr10	116177772	116178863		chr1	39189321	39190460		chr10	120947008	120948671		chr13	58194400	58218399		chr19	40046800	40053599		chr2	83714400	83726599
chr10	118698316	118701303		chr1	40172042	40173888		chr10	124806978	124808096		chr13	69160000	69165999		chr19	40067600	40077999		chr2	115223800	115226599
chr10	120920299	120928647		chr1	40306024	40306898		chr11	5908422	5909239		chr14	20797200	20801599		chr2	27351200	27360799		chr3	14908600	14910399
chr10	120928849	120933165		chr1	41255729	41256711		chr11	6344638	6345398		chr14	21531200	21541599		chr2	60411200	60425199		chr3	18482000	18484599
chr10	120933202	120939815		chr1	41612718	41615931		chr11	7750511	7751440		chr14	35378400	35390799		chr2	81090800	81116799		chr3	67229400	67232999
chr10	120945612	120948902		chr1	41616344	41619415		chr11	16638613	16639443		chr14	45289600	45293999		chr2	154844000	154851199		chr3	85080200	85081399
chr10	120952237	120954001		chr1	42220120	42220955		chr11	16639944	16641455		chr14	52002000	52005999		chr3	3000000	3017199		chr3	95305200	95314599
chr10	127698704	127701532		chr1	42546347	42546954		chr11	20104181	20105717		chr14	60767200	60771999		chr3	3021600	3033999		chr3	98421400	98440599
chr11	4804765	4807221		chr1	42797918	42799319		chr11	38494283	38495107		chr14	76841600	76849199		chr3	28774400	28775199		chr3	98447400	98449199
chr11	12379594	12380980		chr1	43333907	43334697		chr11	53914168	53915282		chr14	78007600	78015599		chr3	57090000	57099999		chr3	98470200	98473399
chr11	12381198	12382796		chr1	43586212	43588168		chr11	66798237	66799461		chr14	101904400	101910799		chr3	69428000	69439999		chr3	107842600	107843399
chr11	12394756	12396334		chr1	43884734	43885844		chr11	75840445	75841495		chr14	119035600	119041999		chr3	69449200	69455999		chr3	138044600	138048799
chr11	12400701	12402629		chr1	43994864	43996517		chr11	86159552	86161635		chr14	121195200	121199199		chr3	69460800	69499199		chr3	138057400	138059199
chr11	17632037	17636207		chr1	44608116	44609541		chr11	86167768	86168854		chr14	122081600	122092399		chr3	74246400	74255999		chr3	149269400	149272399
chr11	22386673	22392467		chr1	44631844	44633065		chr11	86891777	86892753		chr15	4898000	4902399		chr3	74403200	74412399		chr3	149303800	149310199
chr11	23345603	23349091		chr1	44852828	44854709		chr11	87235176	87236418		chr15	4937600	4949199		chr3	98641200	98667199		chr4	61827000	61829399
chr11	29430741	29433716		chr1	44890623	44891602		chr11	87239384	87240234		chr15	18630800	18631599		chr3	98670800	98703199		chr4	103069000	103084999
chr11	44781511	44783595		chr1	45073370	45074186		chr11	87912716	87913563		chr15	21044400	21049999		chr3	98710000	98807599		chr4	103100000	103104799
chr11	46110705	46113382		chr1	45312363	45314793		chr11	96778012	96778670		chr15	27697200	27709999		chr3	142355200	142373199		chr4	103106000	103121999
chr11	51898556	51902607		chr1	45488720	45489539		chr11	98697789	98698649		chr15	38907200	38917599		chr4	6887200	6927999		chr4	103132800	103142199
chr11	54153039	54154192		chr1	45898342	45900057		chr11	100432008	100433169		chr15	56923200	56933999		chr4	7506000	7510399		chr4	103146400	103153199
chr11	55877948	55879085		chr1	45928673	45930819		chr11	101543862	101545911		chr15	76281200	76298399		chr4	34832000	34847999		chr4	103163400	103170599
chr11	55882388	55884176		chr1	45953687	45955348		chr11	102170555	102172661		chr15	77820000	77827999		chr4	122635200	122672399		chr4	103173600	103176599
chr11	64373321	64374732		chr1	46906680	46907690		chr11	106904674	106905672		chr15	78495600	78527599		chr5	44485600	44497199		chr4	114973800	114980999
chr11	76741611	76743103		chr1	47991223	47992636		chr11	107060345	107061257		chr15	79309200	79319199		chr5	80239600	80244799		chr4	114988400	114989799
chr11	78007631	78009772		chr1	50863562	50864514		chr11	109954660	109959594		chr15	80837600	80856799		chr5	87620000	87635999		chr4	114994200	115006599
chr11	78014889	78017344		chr1	51011597	51012478		chr11	109962494	109963208		chr15	83697200	83701999		chr5	105351600	105357999		chr4	115060400	115068399
chr11	78119748	78121680		chr1	51014512	51015941		chr11	115883553	115884335		chr15	84123600	84134799		chr5	122309200	122319999		chr4	115086600	115097799
chr11	81823193	81825922		chr1	51163503	51164137		chr11	120383280	120386902		chr15	84627600	84639199		chr5	122323600	122339199		chr4	146811000	146812799
chr11	84494933	84497803		chr1	51329180	51330007		chr11	121684639	121685775		chr15	85364000	85379599		chr5	122343200	122362399		chr5	105230600	105238399
chr11	101120573	101122846		chr1	51561914	51563504		chr11	121804523	121805616		chr15	85728400	85738399		chr5	122365600	122425999		chr5	105272800	105273999
chr11	102866511	102873475		chr1	51793398	51794251		chr12	7925386	7928380		chr15	89130000	89140799		chr5	126302000	126356799		chr5	105275000	105279399
chr11	103624647	103625470		chr1	52563249	52564447		chr12	7943791	7944898		chr15	89399200	89408799		chr5	146181200	146204399		chr6	27883400	27890199
chr11	111100139	111102376		chr1	52722554	52723132		chr12	7955482	7957948		chr15	93392800	93408799		chr5	146473200	146479199		chr6	27918800	27921799
chr11	111103576	111104445		chr1	53369390	53370477		chr12	9576772	9577962		chr15	94353600	94362799		chr5	146482000	146491599		chr6	27927000	27931599
chr11	111117222	111118417		chr1	53833528	53835010		chr12	18190783	18191424		chr15	97299200	97303599		chr5	146534400	146541599		chr6	50259800	50296999
chr11	111857269	111859512		chr1	53896121	53897432		chr12	20232809	20233765		chr15	99248800	99280399		chr5	146545600	146563199		chr6	50316400	50320399
chr11	113477476	113481258		chr1	54006909	54007473		chr12	20235551	20240361		chr15	100964000	100968399		chr5	146606800	146624799		chr6	85766400	85768399
chr12	3701592	3704738		chr1	54580499	54582319		chr12	37967420	37970203		chr15	101120800	101128799		chr6	37556800	37603999		chr6	137963000	137969999
chr12	8095494	8097803		chr1	54633009	54633976		chr12	45375165	45376106		chr15	101192400	101204799		chr6	37615600	37634799		chr6	137984600	138002399
chr12	8210980	8219640		chr1	55309528	55310851		chr12	45660268	45660849		chr16	3643600	3664799		chr6	37677600	37705999		chr6	141827600	141829399
chr12	8220968	8225740		chr1	58098102	58100052		chr12	60199085	60199950		chr16	17253600	17262799		chr6	37709600	37723999		chr6	143517200	143522399
chr12	29758913	29761685		chr1	58142696	58144234		chr12	71249059	71249784		chr16	21209200	21223199		chr6	37765600	37785999		chr7	37894400	37896599
chr12	34922542	34924601		chr1	58180756	58181854		chr12	73542619	73543609		chr16	32824000	32835999		chr6	37788800	37799999		chr7	56133800	56135999
chr12	55462429	55464034		chr1	58183215	58184240		chr12	75417402	75418406		chr16	33546400	33551199		chr6	115372000	115414799		chr7	94429200	94437399
chr12	74938324	74940333		chr1	58210767	58211741		chr12	76953969	76954972		chr16	65940000	65947999		chr6	115418000	115436399		chr7	94451800	94488599
chr12	85613870	85615511		chr1	58229063	58229827		chr12	79306667	79307650		chr16	69422000	69432399		chr7	14136000	14143199		chr7	94489600	94525199
chr12	86146568	86149195		chr1	58235990	58236729		chr12	79319762	79321073		chr16	88750400	88754799		chr7	14184400	14199199		chr7	94534200	94548999
chr12	86737242	86739462		chr1	58633235	58638900		chr12	79349024	79350240		chr16	91943200	91947999		chr7	14206400	14217199		chr7	113391200	113394199
chr12	86740981	86742021		chr1	58645119	58646202		chr12	100189050	100189837		chr16	94385200	94414399		chr7	14220000	14269599		chr7	117646200	117651599
chr12	87853502	87856504		chr1	58658252	58658970		chr12	102313231	102314271		chr17	5577600	5588399		chr7	14272400	14278799		chr7	125721000	125725999
chr12	87856755	87857582		chr1	58665760	58669120		chr12	105103413	105104091		chr17	5813600	5824399		chr7	14381200	14403199		chr8	35515000	35516999
chr12	92798125	92801222		chr1	59355986	59356947		chr12	105345224	105346867		chr17	12441200	12453599		chr7	14538800	14551199		chr8	48004600	48007199
chr12	98784845	98786224		chr1	59841102	59841881		chr12	117297649	117299047		chr17	12456800	12476799		chr7	14554800	14574799		chr8	48030600	48035999
chr12	103172938	103174355		chr1	59918786	59919495		chr12	118896358	118898846		chr17	15220400	15231199		chr7	14685600	14699199		chr8	48114800	48119799
chr12	111661742	111666636		chr1	60077493	60078384		chr13	4048194	4051355		chr17	23870400	23883599		chr7	14704000	14710399		chr8	48151000	48158399
chr12	113780518	113781625		chr1	60246664	60247294		chr13	4232799	4235422		chr17	24631200	24643999		chr7	14714800	14730399		chr8	49705200	49710399
chr12	115325538	115327534		chr1	60249338	60250793		chr13	4387537	4389129		chr17	25513600	25535599		chr7	14772400	14803599		chr8	58517800	58521599
chr13	4262964	4265815		chr1	60560726	60563534		chr13	4432206	4438761		chr17	27086400	27103999		chr7	14808000	14828799		chr8	97079200	97084799
chr13	4268499	4271115		chr1	60606345	60607363		chr13	4607329	4609166		chr17	27243200	27263199		chr7	14889600	14920799		chr8	97086200	97090999
chr13	6329103	6331010		chr1	60616562	60617769		chr13	9073063	9077120		chr17	27298800	27312799		chr7	26624400	26671999		chr8	116530600	116539799
chr13	7305493	7307586		chr1	60900812	60901627		chr13	12921068	12922432		chr17	28989200	28996799		chr7	26682800	26701999		chr8	116540800	116564799
chr13	7347202	7348972		chr1	61654345	61655424		chr13	13021957	13023573		chr17	29289600	29303999		chr7	26704800	26715599		chr8	116570600	116586999
chr13	7413787	7415268		chr1	61667009	61668040		chr13	19456008	19456768		chr17	30332800	30346799		chr7	26721200	26750399		chr8	117747800	117750799
chr13	8694451	8701296		chr1	61695595	61699469		chr13	21263333	21264241		chr17	30352800	30361599		chr7	26762800	26772399		chr8	125950000	125953599
chr13	9221504	9223359		chr1	61782267	61783892		chr13	21947165	21947989		chr17	30938400	30940799		chr7	26855200	26899599		chr8	125955000	125957399
chr13	9546152	9547936		chr1	61817231	61818269		chr13	21973711	21975514		chr17	34186800	34203999		chr7	26959200	26975199		chr9	112702400	112706999
chr13	9547955	9549696		chr1	61826012	61827103		chr13	22009981	22011338		chr17	35793200	35807999		chr7	26980800	27021599
chr13	14117710	14121248		chr1	61991530	61993201		chr13	22125770	22126982		chr17	46391600	46411599		chr7	27075600	27087599
chr13	14122171	14129215		chr1	62063373	62064929		chr13	22131542	22133322		chr17	46632000	46645599		chr7	27588000	27605599
chr13	18179330	18182131		chr1	62065162	62067279		chr13	23589828	23590968		chr17	47429200	47437999		chr7	119756400	119829999
chr13	18212068	18215591		chr1	62094795	62095936		chr13	23608272	23611678		chr17	48335600	48344799		chr7	119833600	119846399
chr13	18215785	18216782		chr1	62099276	62100254		chr13	23837481	23838781		chr17	64816000	64820399		chr7	119933200	119955999
chr13	20751697	20754046		chr1	62230086	62230846		chr13	24455860	24456935		chr17	70525600	70530399		chr8	11024800	11168799
chr13	24647863	24651230		chr1	62406422	62407385		chr13	24469621	24471779		chr17	70872800	70877599		chr8	49632400	49647999
chr13	28159949	28162827		chr1	62471014	62472738		chr13	30176416	30177327		chr17	78711200	78719599		chr8	84890800	84898799
chr13	28198888	28203704		chr1	62989031	62990264		chr13	34756663	34757652		chr17	84396400	84413599		chr8	91456800	91470799
chr13	37586382	37587887		chr1	63238874	63239799		chr13	41308165	41309810		chr17	87520000	87541199		chr8	91756000	91800399
chr13	37732961	37739332		chr1	63780428	63781266		chr13	41321858	41323134		chr18	7320000	7323599		chr8	91812000	91840399
chr13	38768682	38769756		chr1	64583597	64584866		chr13	49677115	49678489		chr18	11285600	11289199		chr8	91843200	91889199
chr13	39467776	39469002		chr1	64614421	64615407		chr13	54398488	54399324		chr18	13107600	13113999		chr8	91892400	92107599
chr13	39772939	39774610		chr1	64649279	64650132		chr13	55315733	55316830		chr18	13996400	14009599		chr9	23098000	23201599
chr13	43463776	43465965		chr1	64763246	64764277		chr13	60609187	60610591		chr18	30781600	30794399		chr9	23204400	23217999
chr13	51322807	51325063		chr1	64767622	64768878		chr13	62374160	62374700		chr18	30901200	30907999		chr9	88218800	88266799
chr13	51326647	51327773		chr1	64867156	64867759		chr13	62466571	62467633		chr18	34507600	34511199		chr9	88208400	88215999
chr13	52860146	52863175		chr1	64994136	64994850		chr13	64338229	64339223		chr18	36299600	36309599
chr13	52864539	52869204		chr1	65051838	65052785		chr13	64502463	64503622		chr18	38143600	38161999
chr13	58856858	58858536		chr1	65329235	65330078		chr13	67170557	67171558		chr18	60964400	60988799
chr13	58861551	58863163		chr1	65746820	65747515		chr13	67239671	67241823		chr18	61193200	61205199
chr13	64179157	64180953		chr1	65991393	65992281		chr13	67245762	67246263		chr18	61653200	61667199
chr13	67129974	67132845		chr1	66282461	66284128		chr13	67289914	67290787		chr18	61856800	61862799
chr13	74642915	74643709		chr1	66848925	66851710		chr13	67418261	67419209		chr18	67524000	67537999
chr13	74645001	74646265		chr1	66987259	66987974		chr13	67591638	67592900		chr18	69755200	69775199
chr13	75034354	75036465		chr1	67060710	67061591		chr13	74509286	74510309		chr18	69832800	69845199
chr13	75807997	75808920		chr1	67113308	67115159		chr13	81101674	81103065		chr18	74354000	74358399
chr13	92094379	92095288		chr1	67194576	67197539		chr13	81478839	81482421		chr18	78082800	78089599
chr13	102644565	102648446		chr1	67231958	67233606		chr13	81493500	81494216		chr18	80294000	80301999
chr13	104282660	104285385		chr1	67247518	67248318		chr13	93615843	93617319		chr18	82684400	82695999
chr13	104288720	104290968		chr1	67314081	67315335		chr13	94109714	94110605		chr18	82988800	83001999
chr13	104348140	104350187		chr1	67318045	67320401		chr13	95022032	95023314		chr18	83154000	83161999
chr13	104368836	104369879		chr1	67358382	67360483		chr13	95745540	95747411		chr18	84374400	84389599
chr13	104378522	104386649		chr1	67404018	67405334		chr13	96386813	96389075		chr18	85876400	85886399
chr13	104390744	104393448		chr1	68855700	68857036		chr13	99714363	99715498		chr19	4103200	4108799
chr13	104433697	104434904		chr1	68933987	68934729		chr13	104382105	104384622		chr19	4154000	4162799
chr13	108456256	108457614		chr1	69847752	69849117		chr13	107625341	107626367		chr19	5046000	5059999
chr13	112694870	112696300		chr1	69940198	69941618		chr13	108260052	108260683		chr19	6100400	6116799
chr13	112781438	112784771		chr1	70126529	70127543		chr13	112986462	112987460		chr19	6445600	6458399
chr13	112977823	112987806		chr1	70327258	70328557		chr13	113078037	113079010		chr19	7028800	7043999
chr13	113072156	113073773		chr1	70542505	70543297		chr13	116385668	116386323		chr19	7136000	7146399
chr13	113076775	113079474		chr1	70938354	70939783		chr14	12187770	12189466		chr19	10319600	10331599
chr13	113813058	113814234		chr1	70973988	70975035		chr14	13998648	13999599		chr19	14345600	14355199
chr14	9257843	9259945		chr1	71576634	71578656		chr14	35064967	35066058		chr19	19346800	19354799
chr14	11582367	11583374		chr1	71775093	71776173		chr14	50681144	50682700		chr19	24940800	24953599
chr14	11956507	11958748		chr1	71806105	71807264		chr14	55035768	55037070		chr19	27393600	27398799
chr14	11963663	11966545		chr1	72343144	72343703		chr14	56194163	56195815		chr19	28432000	28443999
chr14	11970303	11973193		chr1	72744984	72746420		chr14	57993312	57995666		chr19	33074800	33085199
chr14	19018964	19019851		chr1	74231732	74232571		chr14	66284967	66286734		chr19	35480000	35491999
chr14	21136008	21139888		chr1	75090587	75092080		chr14	72998396	73003749		chr19	35911600	35923199
chr14	21809599	21815197		chr1	75731741	75732722		chr14	75592252	75593284		chr19	43135200	43145999
chr14	40077623	40079345		chr1	76302333	76303690		chr14	77235023	77236246		chr19	46382400	46400799
chr14	46402993	46405741		chr1	76699858	76700359		chr14	77236253	77237523		chr19	47728400	47756399
chr14	51131010	51131929		chr1	76914753	76916217		chr14	79918479	79919394		chr19	52338800	52347199
chr14	53226472	53228428		chr1	77168979	77169816		chr14	79968530	79969541		chr19	55587200	55598799
chr14	55764906	55780690		chr1	78138066	78139067		chr14	80040877	80042278		chr19	56000000	56008799
chr14	64096039	64100891		chr1	78926523	78927344		chr14	86509811	86511000		chr2	4406800	4415999
chr14	66284516	66287216		chr1	78966588	78967683		chr14	88865390	88866475		chr2	10088800	10098799
chr14	66333567	66342219		chr1	80280017	80283187		chr14	89834325	89835514		chr2	10312800	10318399
chr14	66698162	66700086		chr1	80447689	80448521		chr14	91398045	91398887		chr2	16168800	16173599
chr14	68248896	68250737		chr1	80451540	80452260		chr14	100599140	100599947		chr2	27351200	27360799
chr14	69424940	69427054		chr1	81575891	81576916		chr14	115451320	115452583		chr2	30107600	30112399
chr14	116706703	116708774		chr1	81747031	81748206		chr14	118153739	118154821		chr2	31279600	31291199
chr14	116748733	116751217		chr1	81839638	81841027		chr14	118215756	118216799		chr2	55037600	55042799
chr14	117846625	117848923		chr1	82084417	82086026		chr14	118635776	118636772		chr2	93455600	93459999
chr14	118148856	118151535		chr1	82358813	82360335		chr14	122363762	122364348		chr2	100215600	100218399
chr14	120227095	120232788		chr1	82854154	82855618		chr15	4676837	4680616		chr2	119836400	119845599
chr14	120233024	120237317		chr1	82967446	82968171		chr15	6394533	6399840		chr2	125958400	125961999
chr14	120655451	120658629		chr1	83012779	83013755		chr15	10179017	10181085		chr2	129427600	129432399
chr14	120931136	120934839		chr1	83896387	83898309		chr15	23452437	23453317		chr2	130184400	130191599
chr15	3549646	3563341		chr1	84042278	84043299		chr15	25414804	25416407		chr2	130963200	130973199
chr15	3668823	3672032		chr1	84082107	84082804		chr15	25551231	25552025		chr2	152147600	152154799
chr15	4627247	4630351		chr1	84116543	84117251		chr15	35306650	35307966		chr2	154844000	154851199
chr15	4667434	4669821		chr1	84124734	84126019		chr15	55877988	55878691		chr2	155319200	155332799
chr15	4674356	4675907		chr1	84228595	84229723		chr15	78102275	78103042		chr2	156914800	156930399
chr15	4676013	4680498		chr1	84295477	84297168		chr15	81029427	81030498		chr2	157284400	157293599
chr15	4785827	4787384		chr1	84755099	84756167		chr15	82281835	82286788		chr2	164595600	164605599
chr15	6166557	6176309		chr1	84785145	84788621		chr15	95604488	95605138		chr2	164656400	164670399
chr15	10892037	10893720		chr1	84810399	84811261		chr15	96878075	96881337		chr2	165220000	165229599
chr15	33616579	33617895		chr1	84811651	84813112		chr15	102016965	102019665		chr2	168471600	168481199
chr15	33630863	33633087		chr1	88102310	88103599		chr15	102087228	102088616		chr2	168730000	168765999
chr15	36363817	36366417		chr1	88118323	88119038		chr16	4756619	4757840		chr2	169692800	169721599
chr15	36827886	36830878		chr1	88183590	88184577		chr16	10834485	10835801		chr2	172730000	172750799
chr15	38521812	38523445		chr1	89555473	89556004		chr16	11405313	11408295		chr2	179502400	179505999
chr15	41878762	41880146		chr1	89884005	89884798		chr16	14152428	14153518		chr2	179907600	179941999
chr15	43441291	43448323		chr1	90387679	90389147		chr16	21818077	21819015		chr3	53271600	53289999
chr15	61848149	61850096		chr1	90410362	90411373		chr16	23898342	23899236		chr3	54862400	54870799
chr15	64247484	64248994		chr1	90530912	90531416		chr16	24085349	24091032		chr3	58587600	58597199
chr15	64258351	64259316		chr1	90641797	90642570		chr16	25945007	25946092		chr3	69956400	69962799
chr15	67300519	67302377		chr1	90645204	90646075		chr16	26749043	26750106		chr3	79261200	79266399
chr15	74979075	74980380		chr1	90656948	90658091		chr16	26750118	26751291		chr3	98741200	98753199
chr15	81128043	81133390		chr1	90658354	90662315		chr16	35379544	35380336		chr3	108755200	108770399
chr15	82263239	82269852		chr1	90669472	90670483		chr16	35634356	35635285		chr3	120046400	120047999
chr15	82272331	82276082		chr1	90757025	90758856		chr16	38058610	38059190		chr3	122002800	122012399
chr15	82278571	82288554		chr1	90856212	90857383		chr16	43234885	43238504		chr3	135387600	135395199
chr15	95579204	95581435		chr1	91079729	91081086		chr16	43247192	43248469		chr3	144056000	144061199
chr15	102009918	102021270		chr1	91226569	91227875		chr16	43979149	43980290		chr4	41055600	41070799
chr15	102021587	102026987		chr1	91420486	91421371		chr16	45944903	45947326		chr4	42085600	42092799
chr16	6776835	6777771		chr1	91732358	91733262		chr16	55862937	55863990		chr4	42096400	42102399
chr16	6784123	6785297		chr1	91839398	91840283		chr16	55950980	55952027		chr4	45646400	45651999
chr16	10647297	10650265		chr1	91915138	91915685		chr16	57548768	57551218		chr4	102400000	102403599
chr16	16565365	16570473		chr1	92428555	92429167		chr16	77402581	77403865		chr4	107293600	107305599
chr16	18845172	18846867		chr1	93935748	93936633		chr16	77420553	77422672		chr4	107512400	107528399
chr16	28989576	28991659		chr1	94561072	94564550		chr16	77469391	77470451		chr4	118220400	118221199
chr16	34334211	34338651		chr1	95538043	95539021		chr16	77499494	77502164		chr4	128534400	128543999
chr16	36770369	36771082		chr1	95605514	95607199		chr16	78200279	78201025		chr4	134215200	134228799
chr16	37901131	37903250		chr1	97234330	97236666		chr16	81434284	81435481		chr4	134951600	134961199
chr16	46100175	46102167		chr1	98779800	98781072		chr16	84744905	84746410		chr4	137237600	137250399
chr16	52248961	52252714		chr1	99287504	99288943		chr16	86806624	86809827		chr4	137263600	137294399
chr16	52675325	52676931		chr1	99376277	99377362		chr16	93938388	93939325		chr4	139051600	139063599
chr16	55840398	55842814		chr1	99655588	99657541		chr16	96365687	96366884		chr4	140574000	140592399
chr16	81187026	81189309		chr1	99659668	99661220		chr16	96579142	96579914		chr4	140597200	140613999
chr16	85626674	85628135		chr1	100482972	100483758		chr16	98289215	98290085		chr4	141014400	141041199
chr16	97502238	97504262		chr1	100559407	100560823		chr17	10493706	10494728		chr4	141670400	141676799
chr17	3238935	3241633		chr1	100603123	100604000		chr17	10506687	10508188		chr4	148165200	148174799
chr17	3378327	3379584		chr1	100608019	100609552		chr17	16997682	16999299		chr4	148307200	148326399
chr17	5547960	5549476		chr1	100609611	100611016		chr17	17096908	17097722		chr4	149069600	149082399
chr17	5754111	5756802		chr1	100630113	100630709		chr17	17108219	17109888		chr4	149255200	149272399
chr17	5940442	5942715		chr1	100643683	100645251		chr17	21162694	21164217		chr4	153430800	153445199
chr17	5964246	5966907		chr1	100689192	100690663		chr17	21164293	21165381		chr4	153684800	153700399
chr17	5995927	6000348		chr1	101996994	101998290		chr17	21957674	21959168		chr4	154036400	154048799
chr17	6000392	6001972		chr1	102070742	102071317		chr17	22063586	22065613		chr4	154424400	154434399
chr17	6017202	6022539		chr1	102108755	102110560		chr17	22066698	22067817		chr4	155417200	155434399
chr17	11652892	11654276		chr1	102115526	102116740		chr17	22070718	22071351		chr5	17704000	17710799
chr17	18458128	18460756		chr1	102194356	102196190		chr17	22076778	22078073		chr5	18752000	18755199
chr17	24399150	24400152		chr1	102393008	102394921		chr17	22127571	22129717		chr5	30671600	30693599
chr17	29520397	29524784		chr1	102408319	102409254		chr17	22131253	22132317		chr5	57615600	57621999
chr17	29591229	29596009		chr1	102431922	102432898		chr17	22135176	22136493		chr5	66871200	66883599
chr17	31614879	31619066		chr1	102594463	102596099		chr17	22476695	22477695		chr5	80237600	80244799
chr17	34360951	34362219		chr1	102609124	102610276		chr17	22509378	22512002		chr5	93378400	93387599
chr17	34373011	34374643		chr1	104270243	104270733		chr17	22529830	22530447		chr5	98669600	98671999
chr17	34959390	34963474		chr1	104629985	104633338		chr17	22590786	22591866		chr5	105351600	105387199
chr17	34966523	34968731		chr1	106794504	106795242		chr17	22850212	22851158		chr5	106031600	106039599
chr17	35109049	35110322		chr1	106985162	106986250		chr17	22908587	22909065		chr5	111604400	111615599
chr17	35611975	35615319		chr1	107188775	107189657		chr17	22909679	22913414		chr5	113666400	113679199
chr17	44188098	44189159		chr1	107566193	107568258		chr17	22913768	22915849		chr5	114877600	114887199
chr17	44191316	44200174		chr1	107575400	107577177		chr17	22916301	22917736		chr5	115118800	115133999
chr17	44200900	44214469		chr1	108247034	108247895		chr17	22918931	22919707		chr5	115137200	115149199
chr17	46274573	46277490		chr1	109669333	109670305		chr17	27957672	27958881		chr5	115230000	115249599
chr17	48091551	48093526		chr1	109734226	109734992		chr17	28216705	28217345		chr5	115993200	116003199
chr17	48138167	48139704		chr1	109811474	109812694		chr17	30271935	30275102		chr5	117928000	117934799
chr17	68636255	68640427		chr1	112265798	112266760		chr17	33471355	33473703		chr5	122345600	122395599
chr17	68660118	68664535		chr1	115123833	115124361		chr17	34959035	34959824		chr5	122410800	122434799
chr17	75109562	75111295		chr1	119252865	119253589		chr17	34959990	34960725		chr5	122439200	122448399
chr17	75905140	75906892		chr1	120346918	120348227		chr17	36033212	36034672		chr5	122451200	122465999
chr17	76175005	76176089		chr1	120708883	120709788		chr17	43406296	43408183		chr5	122469600	122499199
chr17	80724225	80726030		chr1	121489329	121490900		chr17	44203763	44204690		chr5	122679600	122689599
chr17	81058116	81060649		chr1	122264257	122266352		chr17	44207107	44209072		chr5	126299600	126345199
chr17	93907607	93909457		chr1	123370238	123371117		chr17	44950538	44951840		chr5	136694800	136700799
chr18	9484931	9488040		chr1	125964938	125966871		chr17	46581781	46582709		chr5	137585200	137592399
chr18	9502679	9506416		chr1	127447970	127448997		chr17	49442735	49444716		chr5	138174000	138182399
chr18	12232608	12236227		chr1	127640463	127641720		chr17	50528665	50529756		chr5	140828800	140838399
chr18	12681656	12684687		chr1	128194547	128196347		chr17	56003923	56005023		chr5	141048800	141060399
chr18	12704016	12717467		chr1	128421647	128423001		chr17	74730025	74731173		chr5	143201600	143206799
chr18	12719997	12724641		chr1	128941260	128944060		chr17	74998416	74999335		chr5	151666800	151673999
chr18	12731884	12733128		chr1	129396771	129397436		chr17	79387496	79388697		chr6	29437200	29449199
chr18	13545578	13546608		chr1	129687524	129691238		chr17	80893143	80894038		chr6	53870000	53881999
chr18	13546838	13549404		chr1	129784421	129785594		chr17	85136589	85137843		chr6	83573600	83577599
chr18	15101700	15104017		chr1	129795055	129797219		chr17	87842072	87843317		chr6	91863200	91872399
chr18	15495483	15497284		chr1	129947134	129947978		chr18	3278855	3282227		chr6	93310000	93321599
chr18	31889935	31891608		chr1	129991518	129993459		chr18	7608278	7608979		chr6	115971600	115975199
chr18	33348596	33354114		chr1	130012783	130015621		chr18	8719777	8720412		chr6	120878800	120888799
chr18	43023163	43024990		chr1	130019100	130020142		chr18	9783196	9785522		chr6	146296800	146300399
chr18	45631697	45633248		chr1	130040994	130041823		chr18	12793090	12794295		chr7	3347600	3352399
chr18	45639745	45642693		chr1	130046123	130047449		chr18	12800853	12809967		chr7	3397600	3411999
chr18	54283381	54286229		chr1	130063215	130064254		chr18	12811826	12812781		chr7	12573200	12574799
chr18	54293704	54295565		chr1	130161811	130162582		chr18	12813420	12814859		chr7	16779200	16802799
chr18	61438563	61440071		chr1	130278190	130279205		chr18	13945455	13946150		chr7	19515200	19519999
chr18	74517136	74518124		chr1	130295619	130297649		chr18	15568724	15569524		chr7	25882400	25895199
chr18	75237870	75239623		chr1	131146623	131148761		chr18	20345876	20347267		chr7	30213200	30228399
chr18	81427819	81429536		chr1	132195397	132196851		chr18	26173572	26174391		chr7	31302800	31317599
chr18	81460065	81461681		chr1	132205538	132207146		chr18	32229378	32230947		chr7	36348800	36356799
chr19	3797267	3798960		chr1	132221730	132222628		chr18	37061701	37062800		chr7	46515600	46538799
chr19	4017813	4022850		chr1	132323190	132324505		chr18	37064489	37065308		chr7	51558400	51571599
chr19	4023011	4028593		chr1	132422617	132423209		chr18	39755441	39756252		chr7	51780000	51807999
chr19	8202084	8206030		chr1	132548403	132549462		chr18	43596395	43597957		chr7	53257600	53263199
chr19	8206363	8208544		chr1	132549721	132550698		chr18	55448928	55449890		chr7	80451600	80459199
chr19	8486047	8487888		chr1	133277033	133277665		chr18	64636916	64639862		chr7	85984800	85990799
chr19	12754813	12755784		chr1	133820390	133821173		chr19	3083427	3083922		chr7	86059200	86071199
chr19	12757046	12760962		chr1	133821973	133823708		chr19	8203988	8206008		chr7	104050800	104059999
chr19	26132576	26133922		chr1	135327520	135328428		chr19	8477450	8479144		chr7	106583200	106599199
chr19	39179508	39181270		chr1	135389013	135390417		chr19	9121598	9123087		chr7	109224000	109234399
chr19	39182808	39183895		chr1	135396385	135397352		chr19	12707340	12713733		chr7	109373600	109384799
chr19	39285931	39288640		chr1	135404092	135405804		chr19	12769954	12773934		chr8	3531200	3538399
chr19	39301867	39304942		chr1	135846443	135847411		chr19	20464045	20465543		chr8	6678400	6680799
chr19	46172675	46175701		chr1	136390175	136391342		chr19	20625908	20627032		chr8	11195200	11207599
chr19	46205257	46208556		chr1	136438971	136439887		chr19	20675225	20682327		chr8	13590000	13598399
chr19	46208866	46211404		chr1	136803650	136804629		chr19	23135714	23139429		chr8	34815200	34823599
chr19	56244867	56246309		chr1	137210317	137211326		chr19	29815822	29818962		chr8	35609600	35617599
chr19	58164769	58166374		chr1	139038187	139038891		chr19	33130515	33131782		chr8	61212000	61217199
chr19	58627826	58631464		chr1	140289574	140290300		chr19	36720450	36721804		chr8	73517600	73529599
chr2	5529434	5533939		chr1	140410148	140411701		chr19	36738421	36739421		chr8	80059600	80071999
chr2	6792245	6794397		chr1	140472000	140472859		chr19	38117433	38118550		chr8	80812000	80814799
chr2	12350629	12352904		chr1	140839184	140840075		chr19	39303492	39304700		chr8	86430800	86443999
chr2	12352909	12354221		chr1	141052560	141053397		chr19	39721058	39723786		chr8	91971600	91978399
chr2	17113153	17114914		chr1	141255487	141256457		chr19	39982163	39982703		chr8	97849600	97853599
chr2	19622389	19623899		chr1	141443978	141445422		chr19	40685783	40687032		chr8	110068000	110079199
chr2	25666508	25667485		chr1	141445794	141449248		chr19	43838989	43842861		chr8	111367600	111384399
chr2	28861096	28864374		chr1	141456784	141457710		chr19	44093989	44096880		chr8	111420400	111435199
chr2	31722139	31725589		chr1	141466683	141467719		chr19	46205499	46211874		chr8	111931200	111939999
chr2	32378821	32384822		chr1	141467784	141468602		chr19	53539757	53540613		chr8	119086800	119181599
chr2	41893969	41895931		chr1	141705025	141706374		chr19	53971122	53973272		chr8	122276800	122289599
chr2	53559093	53560712		chr1	141706391	141707025		chr19	58165378	58166355		chr8	124673200	124685199
chr2	53622747	53625233		chr1	141709329	141710038		chr19	58993005	58994016		chr8	124775600	124790399
chr2	53648390	53649657		chr1	141736868	141741511		chr19	60861155	60862740		chr8	125875200	125887199
chr2	53683431	53685564		chr1	141744366	141745384		chr19	61196856	61198142		chr9	13415600	13423599
chr2	62744987	62746881		chr1	141755193	141758759		chr2	4912939	4917538		chr9	21809200	21824399
chr2	62764553	62766797		chr1	141769649	141770229		chr2	4920931	4922977		chr9	42548800	42555599
chr2	72605596	72608236		chr1	141858919	141859786		chr2	19637227	19638495		chr9	45146000	45153199
chr2	72633741	72636978		chr1	141977429	141981228		chr2	25036054	25037201		chr9	54028000	54033599
chr2	73807153	73810738		chr1	142060201	142061482		chr2	28956078	28957102		chr9	56724800	56740399
chr2	77386743	77388664		chr1	142157450	142158585		chr2	34912294	34913219		chr9	58077600	58090799
chr2	77767693	77773976		chr1	142204959	142205715		chr2	34922334	34923720		chr9	60947600	60959999
chr2	77781483	77789675		chr1	142302047	142303455		chr2	38019643	38020924		chr9	64342800	64357199
chr2	78491846	78493285		chr1	142374621	142375935		chr2	47857297	47858147		chr9	64971200	64986399
chr2	78495420	78497260		chr1	142380922	142381518		chr2	53037698	53038793		chr9	75098800	75111999
chr2	83672096	83674673		chr1	142406632	142408157		chr2	58605495	58607203		chr9	79836400	79840799
chr2	83691518	83692470		chr1	142415022	142415925		chr2	64811599	64814401		chr9	102436000	102447999
chr2	83693285	83694933		chr1	142426976	142428853		chr2	65070823	65071713		chr9	103653200	103657999
chr2	84932499	84934916		chr1	142465917	142466950		chr2	65073455	65074754		chr9	106253600	106267999
chr2	102596042	102598871		chr1	142557636	142558743		chr2	67561473	67562370		chr9	106568800	106583599
chr2	102602125	102606068		chr1	145494869	145496103		chr2	69472941	69473879		chr9	108862400	108871999
chr2	107465860	107467293		chr1	145516507	145518270		chr2	73085882	73086779		chr9	108874800	108887599
chr2	107804259	107806284		chr1	147780014	147780652		chr2	74510360	74511483		chr9	110528400	110547599
chr2	109587835	109592177		chr1	147841491	147843103		chr2	75908018	75909122		chr9	114770800	114781999
chr2	109597072	109598716		chr1	148163127	148164424		chr2	76550065	76551303		chr9	118974800	118985599
chr2	109644686	109646044		chr1	149212527	149213667		chr2	76559349	76560243		chr9	118990000	118996399
chr2	112449031	112450785		chr1	149494442	149495420		chr2	77707467	77709739		chr9	119327200	119340399
chr2	118484313	118486327		chr1	152250292	152252650		chr2	77725140	77734055		chr9	121174800	121182399
chr2	118488894	118494107		chr1	152324585	152325854		chr2	77734275	77750836
chr2	118495006	118495985		chr1	152349547	152350872		chr2	77807851	77834054
chr2	118496227	118497962		chr1	153018193	153019444		chr2	77834818	77835782
chr2	118502645	118504114		chr1	153324500	153326142		chr2	77842049	77850916
chr2	137378346	137380746		chr1	153334907	153336440		chr2	77857726	77865340
chr2	137405367	137407802		chr1	153664615	153665485		chr2	77897687	77898741
chr2	145205753	145207021		chr1	155317695	155319029		chr2	83488138	83489817
chr2	148791596	148792820		chr1	155999945	156001896		chr2	83691737	83692512
chr2	148819905	148822333		chr1	157065936	157066608		chr2	83693329	83694238
chr2	148829940	148831787		chr1	157189571	157190750		chr2	84261662	84265753
chr2	149425065	149429431		chr1	157264577	157265410		chr2	84318925	84319732
chr2	149437550	149440719		chr1	157276151	157277009		chr2	91716566	91717376
chr2	152372372	152374900		chr1	157443483	157444535		chr2	93292626	93294113
chr2	163124571	163127902		chr1	157451543	157452289		chr2	93906240	93907275
chr2	163133227	163135045		chr1	157698342	157699439		chr2	102290444	102291740
chr2	163135387	163137515		chr1	157791254	157792485		chr2	105736213	105737237
chr2	168899942	168901639		chr1	158499596	158500513		chr2	110141642	110147224
chr3	14722120	14729947		chr1	158504330	158504972		chr2	112431257	112432161
chr3	14745671	14748388		chr1	159068356	159069409		chr2	115737528	115738638
chr3	14749622	14750755		chr1	159104394	159105732		chr2	120966848	120967779
chr3	14750778	14759276		chr1	159117305	159118103		chr2	132522979	132524381
chr3	18140522	18156967		chr1	159178026	159178956		chr2	133434015	133434983
chr3	18195946	18200595		chr1	159192781	159193648		chr2	134377682	134380884
chr3	18242403	18244149		chr1	159210184	159211420		chr2	134625519	134626449
chr3	18324999	18330643		chr1	159276532	159278555		chr2	148512771	148513657
chr3	18357521	18364718		chr1	159310363	159311441		chr2	150004121	150005134
chr3	23638477	23640548		chr1	159410003	159410548		chr2	150148929	150149490
chr3	32460843	32463209		chr1	159605203	159606046		chr2	154844842	154850131
chr3	37099420	37100986		chr1	160774644	160775791		chr2	163465306	163466137
chr3	51814255	51817743		chr1	161087783	161088936		chr2	177301789	177304255
chr3	54297144	54298311		chr1	161198690	161200313		chr2	180978388	180980008
chr3	54310830	54312919		chr1	161220904	161221926		chr3	12855120	12855968
chr3	54320500	54323102		chr1	161247480	161249638		chr3	14678603	14679705
chr3	54324580	54327871		chr1	162374216	162375798		chr3	14774841	14776142
chr3	59856431	59863966		chr1	162476810	162478934		chr3	14989385	14989917
chr3	63617642	63619387		chr1	162518492	162519974		chr3	18139101	18140413
chr3	65597736	65599578		chr1	162545370	162546254		chr3	23835902	23837302
chr3	65820672	65822851		chr1	162615169	162617785		chr3	24961987	24962945
chr3	73483900	73486258		chr1	162657386	162658347		chr3	30982678	30983614
chr3	73605764	73606549		chr1	162896990	162899104		chr3	55986135	55988050
chr3	77740731	77742117		chr1	163061752	163062686		chr3	59065729	59067306
chr3	82630994	82632165		chr1	163758924	163761370		chr3	59834928	59838402
chr3	83862925	83866708		chr1	163799053	163799991		chr3	59885658	59887164
chr3	87355669	87357909		chr1	165102716	165104312		chr3	63843573	63844521
chr3	96290947	96292348		chr1	165747040	165749084		chr3	69907764	69909061
chr3	96449654	96452704		chr1	166097826	166099471		chr3	71762083	71762659
chr3	98447325	98452675		chr1	166143347	166144192		chr3	81771130	81774714
chr3	98477649	98480539		chr1	166648113	166650421		chr3	81774892	81780016
chr3	98480690	98485943		chr1	166747135	166748082		chr3	81785940	81787855
chr3	98486041	98494083		chr1	167704046	167704827		chr3	82093715	82094580
chr3	101634529	101636562		chr1	170362418	170363445		chr3	82136924	82138045
chr3	110903992	110908292		chr1	170418631	170419816		chr3	85068558	85070449
chr3	111832912	111835127		chr1	171198196	171198938		chr3	85354218	85355218
chr3	112607716	112609768		chr1	171411761	171412456		chr3	86252038	86253526
chr3	112622449	112627968		chr1	171461707	171463003		chr3	86813192	86816620
chr3	117998734	118000365		chr1	172150138	172151288		chr3	94484027	94486355
chr3	122667887	122670048		chr1	172363346	172364662		chr3	94497168	94498255
chr3	127545392	127547819		chr1	172684238	172686118		chr3	98447341	98450502
chr3	131001830	131017984		chr1	172732970	172733786		chr3	98523703	98529399
chr3	135710076	135712019		chr1	174096607	174098850		chr3	98558139	98559700
chr3	143772810	143774012		chr1	174626379	174627630		chr3	98559784	98560964
chr3	149534700	149536217		chr1	176419650	176420686		chr3	98561705	98566612
chr4	10385712	10388276		chr1	176589424	176590187		chr3	106538058	106538705
chr4	16574498	16576635		chr1	176670792	176674324		chr3	113274505	113278063
chr4	33315761	33318003		chr1	176680954	176681711		chr3	122573150	122574696
chr4	38893731	38895212		chr1	176681804	176683361		chr3	122597671	122599451
chr4	46887366	46889085		chr1	176721239	176722808		chr3	131002566	131007121
chr4	48022421	48023474		chr1	176730235	176731031		chr3	134944053	134945116
chr4	48905213	48906803		chr1	176777269	176779178		chr3	137795898	137797421
chr4	53248366	53251785		chr1	176785320	176787208		chr3	138039471	138044047
chr4	60083799	60085380		chr1	176794049	176795930		chr3	138080301	138081085
chr4	60520496	60521673		chr1	176846275	176846799		chr3	142757639	142758253
chr4	61675051	61680078		chr1	177515618	177516951		chr3	146233291	146234745
chr4	61723501	61725735		chr1	177579969	177580893		chr3	148842325	148843785
chr4	61807929	61813856		chr1	177582883	177583645		chr3	149326871	149328005
chr4	61818060	61820841		chr1	177672490	177673626		chr4	3151938	3153433
chr4	62875839	62878608		chr1	178620006	178620757		chr4	6718991	6720010
chr4	62889758	62899651		chr1	178728672	178729392		chr4	6826565	6827238
chr4	62911194	62919412		chr1	178739167	178740653		chr4	11485322	11486811
chr4	66191089	66191974		chr1	178976281	178977184		chr4	21615142	21615952
chr4	66785190	66787033		chr1	179642515	179643326		chr4	25925572	25926504
chr4	66790005	66791734		chr1	180138638	180139406		chr4	28572995	28573925
chr4	72061135	72063018		chr1	180159463	180160836		chr4	29506742	29507284
chr4	76607310	76610775		chr1	180694692	180695654		chr4	31382675	31383972
chr4	103018049	103020687		chr1	181281586	181283165		chr4	33475254	33476294
chr4	103020845	103023279		chr1	181897948	181898734		chr4	36897502	36898707
chr4	103024553	103027023		chr1	181898758	181899728		chr4	37018383	37019072
chr4	103052689	103071596		chr1	181927352	181928196		chr4	46965564	46966900
chr4	103076896	103080278		chr1	181971714	181972572		chr4	55307013	55307820
chr4	103121136	103124330		chr1	182813458	182814031		chr4	60081383	60081849
chr4	103606886	103608088		chr1	184509687	184510791		chr4	60435958	60436558
chr4	104633942	104637037		chr1	184523153	184524133		chr4	60593200	60593594
chr4	106789576	106790407		chr1	184531868	184533205		chr4	60593744	60594092
chr4	107777364	107811475		chr1	184687633	184689979		chr4	60594245	60594588
chr4	107814782	107818777		chr1	184896901	184898326		chr4	61744207	61751858
chr4	114935677	114937260		chr1	185777772	185778984		chr4	61753358	61755262
chr4	114947810	114951180		chr1	185792926	185793701		chr4	61810295	61811981
chr4	114951617	114953706		chr1	185899166	185900533		chr4	61819573	61820755
chr4	114955320	114959371		chr1	186491815	186492408		chr4	70191487	70192937
chr4	114961344	114962785		chr1	188118654	188119514		chr4	85675238	85676620
chr4	114970564	114971773		chr1	188498024	188500004		chr4	100448807	100449641
chr4	114973599	114974343		chr1	188608636	188609827		chr4	103054811	103057734
chr4	114997010	114998876		chr1	188627743	188629611		chr4	104039402	104041046
chr4	120851430	120856450		chr1	188961209	188962132		chr4	104544475	104545317
chr4	138805583	138810488		chr1	189823844	189824506		chr4	104545362	104549536
chr4	140415920	140417650		chr1	189949565	189950281		chr4	104801288	104802369
chr4	152252445	152254308		chr1	190153758	190155502		chr4	104843117	104843848
chr4	152255364	152257110		chr1	191150594	191151459		chr4	107783857	107791817
chr4	152261181	152263938		chr1	191969081	191970324		chr4	110023559	110024684
chr4	152265482	152267948		chr1	193414573	193415723		chr4	111359347	111360477
chr4	152268101	152271647		chr1	193579498	193580573		chr4	115273075	115275254
chr4	152373520	152374883		chr1	193584676	193585220		chr4	116399325	116400456
chr4	152375183	152378081		chr1	193589872	193590416		chr4	116883065	116883771
chr4	154153615	154154885		chr1	193606771	193608181		chr4	126697732	126698339
chr4	154283547	154291251		chr1	194494491	194495945		chr4	128989983	128991613
chr5	13847084	13848215		chr1	195442896	195444242		chr4	129001786	129003583
chr5	16907368	16909473		chr1	196054335	196055356		chr4	131953622	131954142
chr5	47227142	47229637		chr1	196144068	196145935		chr4	144550494	144552092
chr5	47246968	47249197		chr1	196239474	196240528		chr4	145661122	145663986
chr5	47252931	47254502		chr1	196286835	196288097		chr4	145666068	145667943
chr5	53668619	53671663		chr1	196363793	196364479		chr4	145667984	145669233
chr5	54753673	54755236		chr1	196518453	196519035		chr4	146766126	146766788
chr5	62434452	62435298		chr1	196828738	196830020		chr4	147533427	147534940
chr5	66932078	66933587		chr1	196957698	196959776		chr4	149502545	149503817
chr5	70713621	70716627		chr1	197014307	197014769		chr4	149708279	149709102
chr5	77742949	77744904		chr1	197044414	197045152		chr4	154289095	154291315
chr5	86541870	86545032		chr1	197046976	197050160		chr5	4004551	4005786
chr5	87003049	87005292		chr1	197110834	197112047		chr5	5707836	5708609
chr5	87454256	87462166		chr10	4804675	4805483		chr5	10106122	10106834
chr5	87854294	87856313		chr10	4936618	4938466		chr5	18161290	18162153
chr5	89780869	89782348		chr10	4943135	4944473		chr5	22944876	22946049
chr5	90630142	90635114		chr10	5028139	5028766		chr5	24223530	24224184
chr5	93180491	93183180		chr10	5074655	5076382		chr5	34037728	34038287
chr5	93201070	93203672		chr10	5226520	5227616		chr5	42158555	42160067
chr5	99419889	99421846		chr10	5489626	5490581		chr5	45832454	45833410
chr5	99425602	99426306		chr10	5539260	5540364		chr5	45841750	45842452
chr5	109835301	109837111		chr10	5828451	5829102		chr5	47228113	47228813
chr5	111870140	111874841		chr10	7141319	7141899		chr5	65814754	65815783
chr5	111893460	111906672		chr10	7504207	7506802		chr5	65824177	65825230
chr5	112003903	112004940		chr10	7782275	7783042		chr5	74028794	74029962
chr5	117510183	117511717		chr10	8629502	8630623		chr5	87350865	87355924
chr5	120025333	120027803		chr10	8763383	8764300		chr5	87374165	87376350
chr5	120028788	120032426		chr10	9596131	9596949		chr5	87428678	87434622
chr5	121999094	122001131		chr10	10127860	10128611		chr5	87515385	87522233
chr5	136362973	136363951		chr10	10144097	10146785		chr5	87563117	87564962
chr5	139216920	139218678		chr10	10231741	10232808		chr5	87565046	87567509
chr5	140411694	140413294		chr10	10270371	10271824		chr5	87567563	87569060
chr5	144184272	144186306		chr10	10537690	10538824		chr5	87762705	87766505
chr5	151634727	151637935		chr10	10564615	10565684		chr5	87776016	87776812
chr6	4038875	4042130		chr10	10876973	10879041		chr5	87803257	87805107
chr6	8379216	8380969		chr10	10898348	10899029		chr5	87805165	87809285
chr6	15231761	15233757		chr10	10959976	10961435		chr5	88001418	88003078
chr6	23996040	23998322		chr10	11006153	11007046		chr5	89119320	89121200
chr6	24094933	24097070		chr10	11016446	11017040		chr5	90843313	90844681
chr6	27702756	27705486		chr10	12474607	12475873		chr5	90889736	90896496
chr6	27761740	27765736		chr10	13770751	13771413		chr5	90949996	90950966
chr6	27772580	27780109		chr10	13838341	13839356		chr5	92950236	92950994
chr6	27913574	27915753		chr10	13866942	13867592		chr5	93181119	93182027
chr6	27965132	27966434		chr10	15100306	15100912		chr5	102194313	102195217
chr6	28000423	28003362		chr10	15478741	15480755		chr5	105232125	105233454
chr6	28016500	28018467		chr10	15487275	15488020		chr5	107002519	107004292
chr6	28057926	28062128		chr10	15871207	15872735		chr5	108429848	108430925
chr6	28068134	28070046		chr10	16189425	16190209		chr5	108795944	108796541
chr6	28077326	28082118		chr10	16263047	16264085		chr5	110312854	110313689
chr6	28083316	28086367		chr10	16339846	16341612		chr5	111844806	111848236
chr6	31289304	31290470		chr10	16347946	16349920		chr5	111852544	111853972
chr6	35811470	35816291		chr10	16559732	16561081		chr5	117534826	117536062
chr6	35839584	35843029		chr10	16581310	16581821		chr5	117536809	117538198
chr6	36229909	36230823		chr10	16601316	16601926		chr5	117814408	117817655
chr6	47943176	47946548		chr10	16903844	16905035		chr5	122947707	122949806
chr6	48377473	48380198		chr10	16931821	16933190		chr5	124804643	124805608
chr6	50256037	50258016		chr10	16979108	16980921		chr5	131333643	131334950
chr6	50330866	50334142		chr10	16991684	16992450		chr5	138427590	138428440
chr6	50680268	50682807		chr10	17270620	17273168		chr5	144860642	144862680
chr6	50715839	50717512		chr10	17799954	17801475		chr5	151459605	151461293
chr6	50721824	50723801		chr10	18083485	18084240		chr5	152208097	152210842
chr6	50753084	50753983		chr10	18104045	18104991		chr6	3348811	3349676
chr6	50754217	50755423		chr10	18202908	18203665		chr6	5172366	5172930
chr6	55837819	55838785		chr10	18753658	18754804		chr6	7794772	7796666
chr6	58560194	58562236		chr10	18803029	18804317		chr6	8813948	8814877
chr6	58683265	58685937		chr10	18804416	18808545		chr6	8901326	8902415
chr6	58689384	58692275		chr10	19171526	19173125		chr6	13820455	13822644
chr6	58700713	58702054		chr10	19304954	19306355		chr6	14780122	14780674
chr6	59395456	59397541		chr10	19539005	19540404		chr6	15842893	15844325
chr6	67386693	67389092		chr10	19634696	19635418		chr6	17676233	17676961
chr6	82876605	82879336		chr10	20039782	20040541		chr6	18465541	18466179
chr6	82881377	82883319		chr10	20052171	20053922		chr6	20556231	20556840
chr6	85658529	85659286		chr10	20182593	20183364		chr6	24905081	24906704
chr6	85760811	85763448		chr10	20328114	20329039		chr6	27749183	27752484
chr6	85769176	85775565		chr10	20335972	20337533		chr6	28346850	28348038
chr6	85780923	85782512		chr10	20561423	20562619		chr6	30249257	30250219
chr6	85782704	85785173		chr10	20685373	20687086		chr6	30910732	30911397
chr6	85785194	85786537		chr10	21992992	21994929		chr6	47331179	47332071
chr6	86671775	86674283		chr10	22447799	22448847		chr6	47416494	47417328
chr6	87244421	87245456		chr10	22747497	22748142		chr6	47730569	47731790
chr6	93900562	93902488		chr10	22792603	22793380		chr6	49163866	49164783
chr6	97820804	97822819		chr10	23039959	23040527		chr6	49987459	49988418
chr6	116296583	116300291		chr10	23141018	23141767		chr6	50331387	50332892
chr6	117224186	117228953		chr10	23699025	23700007		chr6	56869278	56871333
chr6	117245048	117252240		chr10	23957389	23958097		chr6	59982664	59983416
chr6	124511639	124513266		chr10	23974819	23976026		chr6	64599465	64600283
chr6	124516392	124517306		chr10	23977480	23978502		chr6	82020128	82022539
chr6	133950713	133952708		chr10	24080652	24083211		chr6	85769922	85771170
chr6	134410534	134412055		chr10	24113473	24114594		chr6	85781097	85782016
chr6	138408831	138415116		chr10	24122941	24123805		chr6	85868340	85870318
chr6	140690593	140691812		chr10	24190815	24191672		chr6	87382127	87382769
chr6	140695708	140697631		chr10	24191676	24192558		chr6	89164173	89165405
chr6	140702124	140704759		chr10	24274397	24275480		chr6	89671856	89672702
chr6	141921725	141926266		chr10	24290660	24291643		chr6	98055163	98056375
chr6	141938157	141950666		chr10	24558580	24559915		chr6	99156420	99157254
chr6	141955781	141962014		chr10	24565495	24566612		chr6	100237550	100238453
chr6	141965201	141966077		chr10	24845839	24848075		chr6	100832219	100833177
chr6	142750607	142752476		chr10	25282286	25283977		chr6	115971703	115972600
chr6	143191893	143193513		chr10	25319124	25321139		chr6	117247500	117249843
chr6	143285004	143286669		chr10	26724037	26725157		chr6	121787510	121792580
chr6	144017959	144020456		chr10	27888280	27889006		chr6	122085991	122088882
chr6	144285887	144288136		chr10	27889449	27890335		chr6	128612194	128614151
chr6	145273471	145275259		chr10	27920494	27921313		chr6	129153247	129154708
chr6	145430004	145432565		chr10	27924087	27925264		chr6	129401168	129402559
chr6	145539507	145541494		chr10	27946555	27949859		chr6	131673236	131674206
chr6	145801404	145805300		chr10	28032533	28033359		chr6	134564919	134565770
chr6	145805385	145807543		chr10	28034145	28035286		chr6	136864958	136866553
chr6	145811564	145816030		chr10	28054675	28055356		chr6	139964136	139964758
chr6	149164490	149172938		chr10	28085889	28087020		chr6	141585220	141586772
chr6	149305566	149307069		chr10	28151847	28153199		chr6	141814566	141817623
chr6	149307263	149308241		chr10	28194691	28195650		chr6	141890501	141896364
chr7	3331230	3332440		chr10	28204611	28205661		chr6	141958943	141960090
chr7	4121538	4123114		chr10	28275224	28277640		chr6	142418080	142422333
chr7	15030482	15033925		chr10	28737846	28738619		chr6	142650081	142650921
chr7	17244438	17246867		chr10	28763908	28765011		chr6	143373659	143374476
chr7	25628221	25630773		chr10	28778091	28779183		chr6	145811877	145815546
chr7	26359824	26361074		chr10	29068063	29068970		chr6	147592264	147593196
chr7	27857870	27859065		chr10	29851636	29853362		chr6	149088093	149092290
chr7	27889308	27891262		chr10	29885375	29886044		chr6	149102159	149103957
chr7	30385267	30387913		chr10	30284949	30287416		chr7	3226521	3228762
chr7	30526287	30529052		chr10	31233196	31234257		chr7	6351045	6352030
chr7	31472936	31473822		chr10	31261426	31262817		chr7	13076651	13079589
chr7	38870288	38871479		chr10	31277041	31279415		chr7	13079861	13081376
chr7	47063697	47067371		chr10	31298109	31298983		chr7	13346208	13348243
chr7	49749193	49754536		chr10	31363247	31365802		chr7	13427226	13428121
chr7	52554393	52555629		chr10	31368556	31369795		chr7	14554735	14555469
chr7	70066293	70070003		chr10	31370105	31370934		chr7	15027076	15029856
chr7	74167349	74168474		chr10	32003185	32004285		chr7	15030498	15032305
chr7	78342292	78344061		chr10	32599878	32600922		chr7	15106909	15109056
chr7	79135013	79137871		chr10	33835174	33836046		chr7	18987848	18989028
chr7	87129777	87131831		chr10	33910366	33910972		chr7	19885846	19886880
chr7	88598699	88600263		chr10	34112698	34113793		chr7	20534959	20536442
chr7	94372576	94374676		chr10	34308925	34310019		chr7	26234809	26235702
chr7	94374992	94376130		chr10	35668059	35668664		chr7	27909483	27910638
chr7	94394244	94397744		chr10	35793094	35794289		chr7	28275080	28275744
chr7	94518891	94520964		chr10	36686106	36687037		chr7	28773174	28774029
chr7	106172028	106175386		chr10	37260324	37261218		chr7	28774425	28775441
chr7	106179656	106182230		chr10	37833655	37834575		chr7	35837709	35838674
chr7	107822628	107824219		chr10	38887876	38888787		chr7	35999172	36001060
chr7	109327117	109329857		chr10	39464482	39465341		chr7	36951901	36952840
chr7	109331261	109333857		chr10	40013957	40015010		chr7	38984510	38986643
chr7	116030819	116031790		chr10	40139184	40140107		chr7	46452614	46453473
chr7	125698879	125702585		chr10	40149761	40150772		chr7	47119449	47120511
chr7	126658918	126660369		chr10	40156084	40156738		chr7	48631462	48632451
chr7	135158747	135160924		chr10	40525830	40526811		chr7	48737214	48738451
chr7	135162270	135163980		chr10	41523329	41524693		chr7	48799216	48799864
chr7	137977810	137980218		chr10	42237833	42239506		chr7	48801893	48802561
chr7	138592686	138596025		chr10	42246709	42247676		chr7	49861741	49862403
chr7	138596632	138599717		chr10	42495670	42496617		chr7	59142540	59145165
chr7	142235109	142236995		chr10	42505304	42506053		chr7	72511894	72513331
chr7	142444171	142447183		chr10	42510668	42511591		chr7	82617011	82617958
chr7	149104282	149105999		chr10	42970322	42971734		chr7	82643008	82644411
chr8	22106032	22107129		chr10	44331623	44332223		chr7	91827386	91828611
chr8	25269980	25271121		chr10	44850898	44851835		chr7	94394362	94396267
chr8	26860219	26862453		chr10	44910265	44910939		chr7	104106482	104107707
chr8	27458508	27462282		chr10	47371923	47375085		chr7	107761184	107762056
chr8	37327519	37329214		chr10	47550758	47551615		chr7	121465761	121466860
chr8	37353119	37354809		chr10	48000352	48001254		chr7	122759159	122759909
chr8	40001501	40003484		chr10	50321537	50322852		chr7	123001680	123004163
chr8	40007248	40008076		chr10	50450275	50451099		chr7	126773986	126775221
chr8	41355310	41358896		chr10	50481645	50485584		chr7	128060268	128061183
chr8	46153958	46157077		chr10	50520850	50521390		chr7	135153164	135154554
chr8	47455907	47464061		chr10	51124896	51125708		chr7	135199730	135200844
chr8	63044129	63048078		chr10	51427717	51429107		chr7	140125766	140126629
chr8	64127885	64131000		chr10	52418643	52420035		chr7	140130117	140133417
chr8	64659730	64661871		chr10	53034673	53035587		chr7	148529818	148531295
chr8	72360290	72362199		chr10	53037188	53042797		chr8	4627813	4629950
chr8	74731530	74735404		chr10	53712348	53716003		chr8	4839124	4840493
chr8	75540544	75543088		chr10	53743170	53744343		chr8	4894606	4895746
chr8	77600797	77603204		chr10	53995226	53996609		chr8	9008068	9008736
chr8	77628820	77631246		chr10	54912761	54914429		chr8	10891095	10892207
chr8	78896535	78899941		chr10	55047231	55048415		chr8	24308715	24310154
chr8	79063927	79064866		chr10	55641711	55642449		chr8	29605347	29606228
chr8	89015042	89019579		chr10	55648775	55650299		chr8	40725096	40726228
chr8	89059713	89060784		chr10	55744736	55745659		chr8	41953350	41955114
chr8	95907730	95909824		chr10	55760518	55761504		chr8	41956769	41957707
chr8	113167089	113170831		chr10	56806363	56807177		chr8	41969604	41971209
chr8	113890536	113891586		chr10	56996178	56996952		chr8	46154218	46155690
chr8	122937589	122939069		chr10	57005041	57006018		chr8	46377647	46380779
chr8	124591372	124593210		chr10	57239889	57241331		chr8	47922856	47927018
chr8	126483846	126485852		chr10	57482385	57483772		chr8	48036942	48038179
chr9	14273429	14275129		chr10	57485249	57486252		chr8	48992630	48993316
chr9	22008492	22010610		chr10	57725209	57726074		chr8	49824915	49826630
chr9	22011574	22022393		chr10	57911935	57913928		chr8	56098445	56099195
chr9	24235540	24236925		chr10	57960849	57962699		chr8	63874941	63876749
chr9	53099431	53104634		chr10	57994435	57995389		chr8	69955003	69955714
chr9	53985883	53987997		chr10	58350795	58351272		chr8	70018217	70020210
chr9	60772916	60774044		chr10	58668267	58669913		chr8	71403756	71406736
chr9	60797241	60799039		chr10	58733448	58734738		chr8	71749925	71751654
chr9	61694937	61697141		chr10	60139934	60140815		chr8	71752123	71753594
chr9	61718895	61723431		chr10	60618266	60619196		chr8	71825229	71826160
chr9	62881410	62883964		chr10	61935790	61936847		chr8	73999862	74000958
chr9	76120924	76122193		chr10	62671534	62673394		chr8	86590702	86591594
chr9	78075962	78077568		chr10	64328440	64329207		chr8	89138929	89140988
chr9	78103260	78104168		chr10	64826737	64828492		chr8	95749597	95750593
chr9	78137116	78137926		chr10	64831292	64832062		chr8	107569774	107570710
chr9	79577157	79579967		chr10	65314607	65315415		chr8	116652194	116656160
chr9	80103213	80107898		chr10	66395641	66397303		chr8	121947454	121951094
chr9	80440216	80441836		chr10	66629000	66629620		chr8	124830857	124832695
chr9	80564676	80567137		chr10	66773694	66774336		chr8	125951471	125952011
chr9	80573361	80575489		chr10	67398304	67398921		chr9	22014256	22018515
chr9	92245211	92248491		chr10	67549885	67551137		chr9	22034122	22034919
chr9	93909526	93915344		chr10	67632783	67633546		chr9	41015590	41016181
chr9	94030637	94032629		chr10	67927585	67929576		chr9	42079097	42082443
chr9	94332571	94334189		chr10	68199107	68203157		chr9	42267503	42272186
chr9	96723609	96725701		chr10	68274069	68274918		chr9	44478875	44480678
chr9	96739477	96740932		chr10	68561345	68561962		chr9	54779804	54780830
chr9	96741196	96744183		chr10	74656758	74657441		chr9	57494303	57495614
chr9	96744352	96745726		chr10	75376055	75376957		chr9	61793650	61794872
chr9	96750450	96753053		chr10	76353854	76354940		chr9	63261401	63262320
chr9	96762788	96764667		chr10	77367091	77368604		chr9	64883274	64884495
chr9	96767567	96770984		chr10	77677455	77679144		chr9	66800061	66801438
chr9	98161456	98162448		chr10	77947338	77948108		chr9	70525758	70526618
chr9	100518282	100521086		chr10	77948466	77949506		chr9	74373659	74374524
chr9	103340573	103341916		chr10	79777627	79778428		chr9	74374836	74376614
chr9	107374640	107378192		chr10	81461199	81461784		chr9	75612527	75613385
chr9	110146114	110148517		chr10	82706642	82707663		chr9	77601036	77602073
chr9	112006051	112008215		chr10	83830689	83831471		chr9	77698138	77700035
chr9	112730588	112732973		chr10	83841273	83842807		chr9	78193707	78194875
chr9	117623306	117625421		chr10	84242169	84243683		chr9	78202510	78203927
chr9	122540294	122542509		chr10	84411193	84412296		chr9	82993971	82996739
chr9	122542847	122546361		chr10	84576877	84578056		chr9	90198501	90199509
chr9	122752087	122764530		chr10	85291870	85292833		chr9	90210071	90211307
chr9	122764568	122768778		chr10	85432790	85433438		chr9	91088305	91089876
chr9	122780305	122785323		chr10	85812284	85813805		chr9	110146975	110148958
chr9	122843327	122844419		chr10	86158750	86159620		chr9	111376494	111377274
				chr10	86503302	86504172		chr9	122772449	122775861
				chr10	87023275	87024112
				chr10	87184393	87185375
				chr10	87257979	87259398
				chr10	87942903	87944256
				chr10	87967984	87968828
				chr10	88181635	88183019
				chr10	89053526	89054369
				chr10	89076226	89077028
				chr10	89082430	89083611
				chr10	91212970	91214037
				chr10	91617006	91617945
				chr10	91693427	91694476
				chr10	91694553	91695467
				chr10	92155611	92156935
				chr10	92715241	92715889
				chr10	92763519	92764292
				chr10	93472362	93474712
				chr10	93476123	93476861
				chr10	93642630	93644244
				chr10	94193199	94194441
				chr10	94420669	94421623
				chr10	94786775	94787631
				chr10	94802903	94805517
				chr10	95044896	95046495
				chr10	95665058	95666228
				chr10	96240451	96242059
				chr10	96286834	96288493
				chr10	96367649	96368582
				chr10	96402091	96403290
				chr10	96404641	96405602
				chr10	96439361	96439922
				chr10	96463125	96464756
				chr10	96523166	96523776
				chr10	96554755	96555789
				chr10	97833218	97834095
				chr10	98005771	98007058
				chr10	98114780	98115437
				chr10	98119637	98120242
				chr10	98127696	98129495
				chr10	98140536	98141683
				chr10	98375588	98376559
				chr10	98381457	98383827
				chr10	98609220	98609801
				chr10	98611308	98614503
				chr10	98746253	98747102
				chr10	98775470	98776160
				chr10	99610497	99611898
				chr10	100929511	100930179
				chr10	100951125	100953207
				chr10	100989855	100990847
				chr10	102156137	102157152
				chr10	104606169	104607850
				chr10	104820792	104822375
				chr10	104963760	104964863
				chr10	106461256	106462050
				chr10	106560802	106561851
				chr10	106770083	106771612
				chr10	106781226	106783841
				chr10	106835086	106836342
				chr10	107183710	107185104
				chr10	107400708	107401799
				chr10	107888627	107889528
				chr10	108147766	108149149
				chr10	108322459	108324294
				chr10	108416074	108417754
				chr10	108955064	108956762
				chr10	109301217	109302224
				chr10	109410335	109411305
				chr10	110088145	110089174
				chr10	110137804	110138664
				chr10	110152447	110152935
				chr10	110326261	110327215
				chr10	110377789	110379061
				chr10	110738173	110740330
				chr10	112427456	112428439
				chr10	112726963	112727704
				chr10	113488643	113489566
				chr10	114170499	114171057
				chr10	114830476	114831819
				chr10	114835316	114836126
				chr10	115927880	115928956
				chr10	115950271	115951716
				chr10	116526385	116527332
				chr10	117062360	117063373
				chr10	117139892	117141268
				chr10	117321330	117322413
				chr10	117892839	117893778
				chr10	117932770	117933421
				chr10	118152672	118153603
				chr10	118317418	118318535
				chr10	118337888	118338658
				chr10	118434509	118435636
				chr10	118629036	118630196
				chr10	118632445	118633468
				chr10	118871101	118872945
				chr10	118978122	118979479
				chr10	119651215	119651866
				chr10	120817696	120818492
				chr10	120919703	120920718
				chr10	120921621	120922504
				chr10	120929108	120932350
				chr10	121844455	121846323
				chr10	121893106	121893927
				chr10	122420176	122421224
				chr10	122607021	122607979
				chr10	123541812	123542593
				chr10	123655705	123657896
				chr10	123938387	123939276
				chr10	124026636	124028059
				chr10	124680471	124682245
				chr10	125552186	125553530
				chr10	127119035	127119555
				chr10	127348306	127349060
				chr10	128297645	128298456
				chr11	4278274	4278935
				chr11	4400323	4400884
				chr11	4478407	4479241
				chr11	4495037	4495893
				chr11	6340048	6340742
				chr11	6673812	6674959
				chr11	6886936	6887636
				chr11	7504795	7505799
				chr11	7715312	7716669
				chr11	11720569	11721597
				chr11	11820994	11824459
				chr11	11844880	11846898
				chr11	12379450	12381149
				chr11	12381426	12382491
				chr11	12394791	12396174
				chr11	12401497	12402488
				chr11	12794987	12795740
				chr11	16405150	16408154
				chr11	16424950	16426004
				chr11	16487095	16491367
				chr11	16607284	16608328
				chr11	16645123	16648624
				chr11	16754050	16756268
				chr11	16756470	16757509
				chr11	16757846	16760266
				chr11	16765162	16766133
				chr11	16766343	16767101
				chr11	16767455	16768108
				chr11	16776733	16778581
				chr11	16787462	16788133
				chr11	16793132	16795206
				chr11	16802482	16803152
				chr11	16806718	16807728
				chr11	16807798	16808705
				chr11	16848154	16849239
				chr11	17114940	17116068
				chr11	17156720	17157577
				chr11	17539861	17540695
				chr11	17548203	17548985
				chr11	17585688	17586533
				chr11	17632954	17637019
				chr11	17954815	17955383
				chr11	17955619	17957387
				chr11	18055289	18056217
				chr11	18147297	18148673
				chr11	18441101	18442904
				chr11	18880019	18881813
				chr11	19792962	19793850
				chr11	19918106	19918708
				chr11	20404945	20405657
				chr11	20465377	20466254
				chr11	20642231	20643725
				chr11	20900636	20901857
				chr11	21008863	21010238
				chr11	21017074	21020770
				chr11	21245071	21248579
				chr11	21248589	21250856
				chr11	21335243	21336486
				chr11	21458271	21459237
				chr11	21912222	21913114
				chr11	22125278	22127016
				chr11	22343158	22344485
				chr11	22387435	22389620
				chr11	22389879	22390690
				chr11	23163402	23164079
				chr11	23232273	23233713
				chr11	23235195	23235735
				chr11	23272458	23273128
				chr11	23346278	23347985
				chr11	23349603	23351137
				chr11	23358342	23360211
				chr11	23386464	23387403
				chr11	25502849	25503822
				chr11	25741129	25742347
				chr11	25902388	25903810
				chr11	25909338	25911111
				chr11	26180067	26180863
				chr11	26274644	26275678
				chr11	26386064	26387343
				chr11	27874466	27875759
				chr11	28568422	28569326
				chr11	28593742	28597604
				chr11	28807928	28809980
				chr11	29073601	29075968
				chr11	29076063	29077903
				chr11	29088519	29090909
				chr11	29431734	29433421
				chr11	29498704	29499337
				chr11	29618029	29619871
				chr11	29676314	29677178
				chr11	30048846	30049667
				chr11	30109077	30109943
				chr11	30668894	30670316
				chr11	30682832	30683816
				chr11	30945664	30946680
				chr11	31811854	31812640
				chr11	32645714	32647255
				chr11	33500584	33501820
				chr11	36962977	36964812
				chr11	37946900	37947721
				chr11	37955363	37956563
				chr11	38223262	38224013
				chr11	38365072	38365751
				chr11	38432129	38433158
				chr11	38446614	38448210
				chr11	38452401	38453187
				chr11	38492595	38495029
				chr11	38495093	38497562
				chr11	38558721	38559667
				chr11	40553551	40554661
				chr11	41284004	41286366
				chr11	42006537	42008290
				chr11	42011243	42014601
				chr11	42072067	42073120
				chr11	43499719	43501932
				chr11	44024896	44025422
				chr11	44746274	44747144
				chr11	44771986	44772671
				chr11	44781940	44783958
				chr11	44784047	44785172
				chr11	48711795	48713573
				chr11	48812931	48813493
				chr11	48891569	48892970
				chr11	49032057	49033532
				chr11	49552850	49553624
				chr11	50107159	50108592
				chr11	50139601	50141180
				chr11	53698773	53699618
				chr11	54273668	54274735
				chr11	54274919	54275752
				chr11	54285190	54286004
				chr11	54476107	54477464
				chr11	54563692	54564728
				chr11	54580361	54581227
				chr11	55882043	55884168
				chr11	59479174	59480671
				chr11	61338299	61339346
				chr11	61528360	61528888
				chr11	62222233	62223765
				chr11	64371685	64372362
				chr11	64649745	64650841
				chr11	64655948	64657209
				chr11	64659084	64659753
				chr11	65533822	65535859
				chr11	65549127	65549921
				chr11	65555215	65556145
				chr11	67218604	67219674
				chr11	67370955	67371697
				chr11	71948541	71949287
				chr11	72022650	72023298
				chr11	72444564	72446044
				chr11	72461735	72466363
				chr11	72472854	72473648
				chr11	72475044	72475685
				chr11	72482183	72482813
				chr11	72484732	72486158
				chr11	72528493	72529945
				chr11	74489713	74492597
				chr11	74494974	74497075
				chr11	74756507	74757479
				chr11	74888327	74889098
				chr11	76149347	76150427
				chr11	76384060	76384933
				chr11	77166732	77167366
				chr11	77195598	77201822
				chr11	77209274	77210051
				chr11	77526087	77527771
				chr11	77529395	77530425
				chr11	77530439	77531179
				chr11	78424727	78425552
				chr11	78511519	78513142
				chr11	79172725	79173246
				chr11	79197266	79198654
				chr11	79361419	79362588
				chr11	79947996	79948702
				chr11	80234093	80234715
				chr11	80241146	80242101
				chr11	80244571	80253259
				chr11	80266779	80267669
				chr11	80272587	80273358
				chr11	81297356	81299308
				chr11	81300200	81301260
				chr11	81301588	81302474
				chr11	81913881	81914993
				chr11	83169087	83169624
				chr11	83296811	83297959
				chr11	83303031	83304126
				chr11	83455238	83456312
				chr11	83755822	83758187
				chr11	84015596	84016214
				chr11	84022748	84023627
				chr11	84056294	84057303
				chr11	84294121	84295505
				chr11	84310177	84311209
				chr11	84661135	84661935
				chr11	84672835	84674597
				chr11	85201594	85203175
				chr11	85204237	85205588
				chr11	85864643	85865472
				chr11	86106919	86107594
				chr11	86308317	86309399
				chr11	86346981	86349626
				chr11	86420821	86421565
				chr11	86435326	86437145
				chr11	86468447	86469735
				chr11	86505500	86506424
				chr11	87268656	87270017
				chr11	87864645	87867490
				chr11	88692172	88693176
				chr11	89741855	89742831
				chr11	90182428	90183515
				chr11	90504083	90505250
				chr11	93217456	93218246
				chr11	93226614	93230082
				chr11	93761729	93762299
				chr11	93808182	93809126
				chr11	93897494	93898267
				chr11	93910176	93911691
				chr11	93933345	93933989
				chr11	94884293	94885254
				chr11	95303384	95304149
				chr11	95340093	95342997
				chr11	97109841	97111483
				chr11	97131701	97132608
				chr11	97304200	97306193
				chr11	97723016	97724211
				chr11	98015619	98016724
				chr11	98072703	98073780
				chr11	98076123	98076984
				chr11	98867819	98869039
				chr11	98943437	98944029
				chr11	100664681	100665367
				chr11	101143003	101143849
				chr11	101611413	101613168
				chr11	102395075	102398677
				chr11	103758652	103761406
				chr11	103815412	103816094
				chr11	104012297	104013467
				chr11	104242360	104248301
				chr11	104383129	104383851
				chr11	105317600	105318462
				chr11	105453402	105454054
				chr11	105534072	105535066
				chr11	105575735	105576589
				chr11	105609770	105611618
				chr11	106099334	106100540
				chr11	109678823	109679828
				chr11	109783908	109785491
				chr11	109996981	109997755
				chr11	111097585	111098726
				chr11	111100514	111102860
				chr11	111103374	111104215
				chr11	111113066	111113982
				chr11	111116431	111118335
				chr11	111130954	111131917
				chr11	111282214	111282781
				chr11	111300909	111301908
				chr11	111304258	111307493
				chr11	111836690	111837771
				chr11	111857086	111860568
				chr11	112846021	112847588
				chr11	116669743	116670397
				chr11	117524039	117525534
				chr11	117537417	117538414
				chr11	117982714	117983851
				chr11	119598270	119598999
				chr11	121827486	121828146
				chr12	3264007	3266786
				chr12	3422346	3423560
				chr12	3445435	3446658
				chr12	3461356	3464231
				chr12	3584659	3585571
				chr12	3711291	3712109
				chr12	4204607	4205943
				chr12	4447286	4448302
				chr12	4590386	4591616
				chr12	4615380	4618666
				chr12	4936724	4938406
				chr12	7879909	7880792
				chr12	7905419	7906196
				chr12	7920611	7922123
				chr12	7964333	7966099
				chr12	8212078	8215008
				chr12	8220848	8225129
				chr12	8231663	8233897
				chr12	8266134	8269862
				chr12	8582095	8582853
				chr12	8705562	8706928
				chr12	8743335	8744326
				chr12	9087568	9088485
				chr12	9535941	9537161
				chr12	9951980	9952722
				chr12	10396881	10397698
				chr12	10400296	10401001
				chr12	10573798	10575616
				chr12	10936564	10937636
				chr12	13475196	13476475
				chr12	14062334	14064045
				chr12	15797856	15799040
				chr12	16922653	16924196
				chr12	16926540	16928339
				chr12	16931899	16932984
				chr12	17892219	17892791
				chr12	21405678	21406525
				chr12	21418738	21419729
				chr12	26164472	26165376
				chr12	26215541	26216501
				chr12	26533054	26534312
				chr12	28768347	28769823
				chr12	30262932	30263740
				chr12	30572495	30573548
				chr12	31535206	31536115
				chr12	31571043	31571983
				chr12	32030938	32032236
				chr12	32252819	32253431
				chr12	32613600	32615412
				chr12	33166870	33167740
				chr12	33217597	33218389
				chr12	33366066	33367026
				chr12	33578040	33578654
				chr12	34936738	34937615
				chr12	35396275	35397268
				chr12	35404942	35407089
				chr12	35682022	35683325
				chr12	35684694	35685777
				chr12	35730384	35731204
				chr12	35744533	35745923
				chr12	35755654	35757321
				chr12	35786582	35787358
				chr12	35839403	35840482
				chr12	35854562	35855678
				chr12	35966512	35970511
				chr12	36183965	36184738
				chr12	36257459	36259185
				chr12	36343564	36344204
				chr12	37349844	37351073
				chr12	37447575	37450303
				chr12	37957278	37958777
				chr12	37962155	37963161
				chr12	38005404	38007033
				chr12	38030551	38031674
				chr12	38033543	38034814
				chr12	38114552	38116299
				chr12	38119482	38120681
				chr12	38128559	38130062
				chr12	38252415	38253526
				chr12	38335003	38336184
				chr12	38849055	38849897
				chr12	40646004	40646835
				chr12	40657606	40659017
				chr12	40719125	40720803
				chr12	40748754	40751285
				chr12	40753037	40754930
				chr12	40758760	40759614
				chr12	40937888	40939112
				chr12	41111635	41112658
				chr12	41396898	41397891
				chr12	41539730	41540644
				chr12	41838142	41839314
				chr12	41846246	41847878
				chr12	42042787	42044094
				chr12	42050706	42051683
				chr12	42058499	42059727
				chr12	42076990	42077967
				chr12	42127511	42129109
				chr12	42141922	42144651
				chr12	42160512	42161432
				chr12	42181448	42182974
				chr12	42212988	42214658
				chr12	42271735	42272897
				chr12	42288835	42289615
				chr12	42857183	42858723
				chr12	42952252	42954279
				chr12	43040653	43041395
				chr12	43535656	43536840
				chr12	44374871	44376319
				chr12	45007572	45008935
				chr12	45019332	45021487
				chr12	45235113	45236816
				chr12	45275040	45276309
				chr12	45294797	45295577
				chr12	45676510	45677317
				chr12	45970808	45972024
				chr12	46006615	46007446
				chr12	46054076	46054986
				chr12	46063196	46064347
				chr12	46145454	46146255
				chr12	46158405	46159246
				chr12	46166044	46167978
				chr12	46249999	46250790
				chr12	46306227	46306852
				chr12	46980243	46981415
				chr12	48506788	48508064
				chr12	51624536	51625203
				chr12	51625244	51625814
				chr12	51628445	51630431
				chr12	52145514	52146607
				chr12	52198984	52199702
				chr12	52206228	52207052
				chr12	52350986	52351950
				chr12	52971371	52972279
				chr12	53117881	53118794
				chr12	53270413	53271381
				chr12	53665572	53667297
				chr12	53672154	53675134
				chr12	53675229	53675991
				chr12	55281521	55282504
				chr12	55479491	55480153
				chr12	55746239	55747315
				chr12	56051206	56052555
				chr12	56919920	56920561
				chr12	57110816	57111621
				chr12	58172948	58174692
				chr12	58230069	58231733
				chr12	58273789	58274707
				chr12	58321346	58323176
				chr12	58359486	58360387
				chr12	58382309	58383209
				chr12	58417232	58419128
				chr12	58468641	58469747
				chr12	58503061	58504283
				chr12	58510876	58511716
				chr12	58514287	58515502
				chr12	58613703	58614771
				chr12	58943736	58944602
				chr12	60057051	60057793
				chr12	60201907	60203455
				chr12	60822964	60824267
				chr12	61393393	61394165
				chr12	61745667	61746563
				chr12	63869676	63872775
				chr12	63976103	63978731
				chr12	64608139	64609268
				chr12	65970004	65970804
				chr12	66019880	66020824
				chr12	66023488	66024451
				chr12	66052414	66053856
				chr12	66061870	66062839
				chr12	70260752	70261186
				chr12	70261255	70261889
				chr12	70618131	70619103
				chr12	70643762	70644702
				chr12	70772988	70773533
				chr12	70796534	70799245
				chr12	70811900	70812823
				chr12	70945596	70946515
				chr12	70975768	70976470
				chr12	71005646	71006261
				chr12	71081245	71082112
				chr12	72091794	72093620
				chr12	72528404	72529438
				chr12	72906023	72907243
				chr12	73139761	73140517
				chr12	73566253	73567229
				chr12	73567868	73569395
				chr12	74333207	74334149
				chr12	75021559	75022512
				chr12	75043329	75045277
				chr12	75417265	75418683
				chr12	75691481	75692439
				chr12	76600259	76601845
				chr12	76602046	76603127
				chr12	76784424	76785228
				chr12	76797473	76798677
				chr12	76846567	76848330
				chr12	77489460	77490292
				chr12	78365938	78366944
				chr12	78455699	78456345
				chr12	78461280	78463178
				chr12	79182879	79183856
				chr12	79202020	79202829
				chr12	79274525	79275686
				chr12	79402294	79403379
				chr12	79432351	79434198
				chr12	79451230	79451989
				chr12	79512874	79513512
				chr12	79520794	79523070
				chr12	79556616	79558202
				chr12	79687135	79687752
				chr12	79878243	79880219
				chr12	79979247	79980676
				chr12	80599882	80600728
				chr12	80625968	80628196
				chr12	81111387	81112734
				chr12	81513830	81514812
				chr12	82615800	82616531
				chr12	83981536	83982300
				chr12	84019828	84020710
				chr12	84975929	84977915
				chr12	84979653	84980352
				chr12	84983327	84984101
				chr12	85617057	85617843
				chr12	85618057	85619360
				chr12	86306513	86307584
				chr12	86368817	86369920
				chr12	86398459	86401117
				chr12	86553126	86553828
				chr12	89598107	89599058
				chr12	90359620	90360678
				chr12	90658587	90659236
				chr12	90746771	90748369
				chr12	91950356	91951459
				chr12	91969611	91970208
				chr12	92798244	92801238
				chr12	95089359	95090092
				chr12	95611164	95611907
				chr12	95656112	95656864
				chr12	95662239	95663851
				chr12	96786810	96789256
				chr12	96827127	96827908
				chr12	99501573	99502761
				chr12	99607432	99608364
				chr12	99947915	99948702
				chr12	100098043	100099677
				chr12	100110642	100111830
				chr12	101630859	101631987
				chr12	101648229	101649885
				chr12	102294112	102297232
				chr12	102360747	102361907
				chr12	102977788	102979500
				chr12	103272338	103272959
				chr12	103985717	103986606
				chr12	103990331	103992999
				chr12	104054864	104055787
				chr12	104066772	104068645
				chr12	104107761	104109991
				chr12	105542070	105542758
				chr12	107047829	107049063
				chr12	107062064	107063556
				chr12	109960390	109960977
				chr12	111034698	111035690
				chr12	118465163	118465876
				chr12	119066656	119067459
				chr12	119200718	119201884
				chr12	119260717	119261877
				chr12	119430563	119432315
				chr12	119479929	119481356
				chr12	119489705	119490310
				chr12	119597259	119598232
				chr12	119641465	119642909
				chr12	119660595	119661413
				chr12	119790640	119792004
				chr12	119850916	119851791
				chr12	120113052	120113930
				chr12	120113962	120114694
				chr12	120125371	120126561
				chr12	120467773	120468710
				chr12	120562199	120563609
				chr12	120839820	120840468
				chr13	3607077	3607976
				chr13	3740739	3741676
				chr13	4027426	4028271
				chr13	4118155	4119184
				chr13	4193447	4194270
				chr13	4201581	4203697
				chr13	4251910	4252760
				chr13	4268878	4270956
				chr13	4394767	4395836
				chr13	4399915	4400749
				chr13	4446826	4447994
				chr13	4576127	4576863
				chr13	4606046	4608186
				chr13	4609697	4610353
				chr13	4614982	4615764
				chr13	4785542	4786359
				chr13	4884946	4885712
				chr13	5228278	5229634
				chr13	5238078	5238863
				chr13	5286785	5287471
				chr13	5586028	5587280
				chr13	6329412	6331128
				chr13	7305358	7307384
				chr13	7346860	7348733
				chr13	7350499	7351650
				chr13	7352201	7353062
				chr13	7413612	7415184
				chr13	7512623	7513139
				chr13	8524842	8526033
				chr13	8647318	8648413
				chr13	8675495	8676193
				chr13	8694884	8695961
				chr13	8696723	8697739
				chr13	8828914	8830240
				chr13	8836630	8837381
				chr13	8887635	8888842
				chr13	8989948	8990878
				chr13	9020105	9020871
				chr13	9021369	9022502
				chr13	9065048	9065748
				chr13	9144222	9145108
				chr13	9304729	9307342
				chr13	9405047	9406286
				chr13	9430523	9431424
				chr13	9711493	9715953
				chr13	9931322	9934048
				chr13	10395540	10396435
				chr13	10444378	10446682
				chr13	10447019	10447971
				chr13	10449959	10450675
				chr13	14011283	14012559
				chr13	14077607	14079850
				chr13	14082726	14083534
				chr13	14086012	14088761
				chr13	14122362	14124750
				chr13	14141670	14143824
				chr13	14283366	14285853
				chr13	16142147	16143728
				chr13	16177134	16177662
				chr13	16514038	16515182
				chr13	16542539	16543760
				chr13	16543953	16545708
				chr13	16552294	16554595
				chr13	16666625	16668059
				chr13	16721502	16722554
				chr13	16723871	16726150
				chr13	16727649	16728839
				chr13	16742888	16743650
				chr13	17290086	17291209
				chr13	17327531	17328206
				chr13	17548647	17549762
				chr13	17871633	17872700
				chr13	18020102	18020934
				chr13	18173507	18174347
				chr13	18180426	18181604
				chr13	18212802	18215392
				chr13	18808292	18808985
				chr13	18819705	18824418
				chr13	19454967	19456079
				chr13	19456313	19457244
				chr13	19487820	19488892
				chr13	20494957	20496225
				chr13	20509859	20511106
				chr13	20752058	20753838
				chr13	20824874	20825805
				chr13	21286923	21287784
				chr13	21290625	21291703
				chr13	21476466	21477716
				chr13	21488258	21489206
				chr13	21489663	21490876
				chr13	21545639	21546576
				chr13	21620131	21621180
				chr13	22107946	22108903
				chr13	23294904	23295452
				chr13	23609611	23612257
				chr13	23621528	23622821
				chr13	23661230	23661925
				chr13	23805896	23807162
				chr13	23832018	23834751
				chr13	23968530	23970065
				chr13	24032334	24033125
				chr13	24142791	24144694
				chr13	24279018	24279732
				chr13	24491634	24492896
				chr13	24691422	24692176
				chr13	24933037	24934446
				chr13	25465083	25466209
				chr13	25787593	25788323
				chr13	26624406	26624979
				chr13	27083044	27084189
				chr13	27798323	27799178
				chr13	27803638	27804447
				chr13	28088149	28089254
				chr13	28116995	28117889
				chr13	28120535	28122138
				chr13	28160149	28162831
				chr13	28186389	28189261
				chr13	28505315	28506459
				chr13	28574795	28576201
				chr13	28583656	28584879
				chr13	28958127	28959387
				chr13	29141286	29142128
				chr13	29718153	29719034
				chr13	29919104	29920681
				chr13	31238038	31238959
				chr13	31530143	31531028
				chr13	31531764	31533351
				chr13	31565788	31567048
				chr13	31613340	31614325
				chr13	32503201	32504244
				chr13	34507799	34508215
				chr13	34668083	34669314
				chr13	34794455	34796109
				chr13	35496774	35497844
				chr13	36588958	36589478
				chr13	36714619	36716585
				chr13	37179597	37180159
				chr13	37222075	37223943
				chr13	37370038	37371053
				chr13	38783902	38785115
				chr13	39052401	39055925
				chr13	39380965	39382293
				chr13	39460626	39461295
				chr13	39467526	39468920
				chr13	39495571	39496541
				chr13	39538763	39541081
				chr13	39551019	39551919
				chr13	39772902	39774396
				chr13	40295316	40296679
				chr13	40410514	40411464
				chr13	40413314	40414343
				chr13	40467770	40468579
				chr13	42138562	42139667
				chr13	42719499	42720231
				chr13	42761442	42762520
				chr13	43511316	43513062
				chr13	43514958	43516645
				chr13	43516852	43517644
				chr13	43518660	43519713
				chr13	43526374	43527149
				chr13	43543511	43544327
				chr13	43715002	43715894
				chr13	44532410	44533765
				chr13	44540842	44542701
				chr13	44826927	44828050
				chr13	44898285	44899354
				chr13	44933587	44934338
				chr13	45065608	45066709
				chr13	45920974	45922238
				chr13	46146183	46148322
				chr13	46149703	46150280
				chr13	46306256	46307246
				chr13	46771995	46774227
				chr13	46916749	46917811
				chr13	47195418	47196483
				chr13	47750865	47751785
				chr13	49676274	49679058
				chr13	49679648	49680900
				chr13	51081927	51083127
				chr13	51402398	51403020
				chr13	54530458	54532364
				chr13	55326374	55327214
				chr13	55362293	55364398
				chr13	57409294	57410819
				chr13	57519167	57520518
				chr13	58293612	58294471
				chr13	58856438	58858575
				chr13	58866069	58867088
				chr13	59051096	59052101
				chr13	60120919	60122092
				chr13	60416145	60416620
				chr13	63021103	63022116
				chr13	63645082	63649055
				chr13	63930224	63930858
				chr13	64107919	64109073
				chr13	64194932	64195627
				chr13	64221082	64221843
				chr13	67024251	67025059
				chr13	67130074	67132345
				chr13	67228293	67229098
				chr13	67294602	67295452
				chr13	67500839	67501538
				chr13	67854401	67856102
				chr13	72695520	72696336
				chr13	74880569	74882176
				chr13	74885592	74886790
				chr13	74894932	74895793
				chr13	74899453	74901330
				chr13	75004863	75005948
				chr13	75034316	75036349
				chr13	75050788	75052272
				chr13	75057365	75058311
				chr13	75176753	75177565
				chr13	75195892	75197072
				chr13	75198658	75199984
				chr13	75444492	75446694
				chr13	75487646	75488746
				chr13	75503859	75505523
				chr13	75830826	75831523
				chr13	75895031	75895935
				chr13	76015357	76016504
				chr13	77188349	77189988
				chr13	77899621	77900825
				chr13	78358835	78359755
				chr13	78820363	78821152
				chr13	81096366	81097359
				chr13	81100088	81100767
				chr13	81246848	81248423
				chr13	81292740	81293571
				chr13	81371794	81373170
				chr13	81451066	81452663
				chr13	81453202	81453996
				chr13	81455777	81457195
				chr13	81475782	81479209
				chr13	81479957	81480658
				chr13	81644221	81645330
				chr13	82339137	82339907
				chr13	82364691	82366399
				chr13	82366626	82367724
				chr13	84372212	84375882
				chr13	85347508	85350690
				chr13	85429113	85431266
				chr13	85645550	85646264
				chr13	85695821	85696517
				chr13	86387172	86387918
				chr13	89930698	89931856
				chr13	90058724	90059441
				chr13	90068724	90070435
				chr13	90087051	90089900
				chr13	90167507	90168236
				chr13	90227592	90229098
				chr13	90505613	90506405
				chr13	90782550	90784611
				chr13	90979894	90981048
				chr13	91171190	91172023
				chr13	91751201	91753027
				chr13	91800480	91801377
				chr13	92094369	92095695
				chr13	92110224	92111759
				chr13	92819793	92821264
				chr13	92899431	92900701
				chr13	93071543	93072375
				chr13	93234364	93235487
				chr13	93481565	93482704
				chr13	93578662	93579301
				chr13	94372639	94373949
				chr13	94489146	94490031
				chr13	94524408	94525807
				chr13	95285766	95288034
				chr13	95291790	95293007
				chr13	95365830	95366625
				chr13	95368291	95369010
				chr13	96145327	96146070
				chr13	96334203	96335097
				chr13	96409271	96410078
				chr13	96412276	96414698
				chr13	96444775	96447433
				chr13	96502022	96502859
				chr13	96527749	96528599
				chr13	96677536	96678238
				chr13	97291482	97292823
				chr13	97464842	97466241
				chr13	97906567	97907653
				chr13	98170621	98171514
				chr13	98540142	98540895
				chr13	98861844	98863350
				chr13	100436125	100437688
				chr13	100729291	100730187
				chr13	102552263	102553377
				chr13	102606297	102607629
				chr13	102674696	102675615
				chr13	102699648	102702321
				chr13	102854032	102855018
				chr13	103047986	103049165
				chr13	103072704	103073813
				chr13	103280341	103281426
				chr13	103684993	103685783
				chr13	103715593	103718034
				chr13	103843812	103844464
				chr13	104283157	104285211
				chr13	104334239	104335222
				chr13	104383985	104385734
				chr13	104648797	104654089
				chr13	104676128	104677006
				chr13	104690125	104691138
				chr13	104969023	104970916
				chr13	105487781	105488756
				chr13	105870665	105871739
				chr13	105878357	105879986
				chr13	106102656	106103488
				chr13	107777794	107780356
				chr13	109089015	109089772
				chr13	109243336	109244246
				chr13	109508716	109509770
				chr13	109886128	109887261
				chr13	110064722	110065548
				chr13	110364349	110365500
				chr13	110382514	110384371
				chr13	110393564	110395614
				chr13	110996738	110998021
				chr13	111080539	111082012
				chr13	111286439	111287263
				chr13	111287777	111288579
				chr13	111455274	111458599
				chr13	111502183	111503722
				chr13	111833961	111834830
				chr13	112223474	112224680
				chr13	112232967	112233764
				chr13	112242257	112243144
				chr13	112638927	112639737
				chr13	112666476	112667585
				chr13	113186757	113187498
				chr13	113692416	113693463
				chr13	113953469	113954461
				chr13	114274590	114275274
				chr13	114324615	114327586
				chr13	114865643	114867205
				chr13	114885775	114888745
				chr13	114893072	114893891
				chr13	115069739	115070714
				chr13	115133018	115134116
				chr13	115583193	115583713
				chr13	115691668	115692992
				chr13	115704436	115706145
				chr13	115764142	115765799
				chr13	115968618	115969381
				chr13	116284191	116285768
				chr13	116286881	116287715
				chr13	116384523	116386735
				chr13	116420746	116421511
				chr13	116443486	116444396
				chr13	116620878	116621854
				chr13	117084095	117084848
				chr13	118278886	118279902
				chr13	118296955	118298814
				chr13	118503694	118504277
				chr13	120257159	120258154
				chr14	9002023	9002879
				chr14	9066129	9066849
				chr14	9072471	9073415
				chr14	9099445	9101117
				chr14	9213790	9214678
				chr14	9257765	9259655
				chr14	9286495	9287381
				chr14	10262649	10263593
				chr14	10323796	10325364
				chr14	10446147	10447779
				chr14	10672836	10673599
				chr14	10684467	10685572
				chr14	10729790	10730889
				chr14	10734933	10735994
				chr14	10853062	10853944
				chr14	10902584	10904013
				chr14	11088411	11089191
				chr14	11116908	11118102
				chr14	11155285	11156206
				chr14	11228219	11229081
				chr14	11253458	11254126
				chr14	11345944	11348105
				chr14	11582230	11584807
				chr14	11840610	11841994
				chr14	11882998	11884511
				chr14	11900463	11902145
				chr14	11963586	11966655
				chr14	11970565	11971663
				chr14	11972519	11973427
				chr14	12090642	12092224
				chr14	12110795	12111802
				chr14	12170197	12170984
				chr14	12186231	12187611
				chr14	12433921	12434839
				chr14	12478862	12480316
				chr14	12546061	12547018
				chr14	12548890	12551116
				chr14	12561476	12562369
				chr14	12738880	12739973
				chr14	13134649	13136169
				chr14	13143869	13144509
				chr14	13157044	13158988
				chr14	13548329	13549544
				chr14	14099961	14100672
				chr14	14457090	14457902
				chr14	14874914	14875830
				chr14	14893299	14894181
				chr14	14906923	14907586
				chr14	14923520	14924451
				chr14	15626029	15626968
				chr14	17087696	17090415
				chr14	17091275	17091980
				chr14	17204226	17207620
				chr14	17240738	17241581
				chr14	17676768	17678211
				chr14	17694030	17695219
				chr14	17952541	17954117
				chr14	18455443	18456356
				chr14	18502280	18503051
				chr14	18639889	18641037
				chr14	19051025	19052254
				chr14	19057253	19058294
				chr14	19071710	19073371
				chr14	19100357	19101286
				chr14	20582613	20584472
				chr14	20588761	20589750
				chr14	21434599	21435525
				chr14	21622386	21623251
				chr14	21755027	21758265
				chr14	21759051	21761471
				chr14	21809614	21815295
				chr14	21997505	21998262
				chr14	22000628	22001255
				chr14	22027498	22029217
				chr14	22065526	22066844
				chr14	22068634	22069933
				chr14	22070036	22071648
				chr14	22084035	22085042
				chr14	22188427	22189192
				chr14	22215119	22215875
				chr14	22229170	22231048
				chr14	22416024	22416497
				chr14	22426165	22428613
				chr14	23006927	23007834
				chr14	23609479	23611073
				chr14	27289307	27290049
				chr14	27776658	27778943
				chr14	28459020	28460063
				chr14	28470990	28472978
				chr14	28503988	28504877
				chr14	28602869	28604996
				chr14	28605376	28607700
				chr14	28621144	28622099
				chr14	28705393	28706141
				chr14	28769237	28769791
				chr14	28786838	28787555
				chr14	30654929	30655706
				chr14	31265547	31267239
				chr14	31874742	31875865
				chr14	31914576	31915769
				chr14	31936976	31937831
				chr14	32992333	32993538
				chr14	33729027	33729487
				chr14	34231139	34232663
				chr14	34249621	34252538
				chr14	35073713	35074478
				chr14	35098231	35099034
				chr14	35502199	35503651
				chr14	35512535	35513768
				chr14	35555020	35561572
				chr14	35871747	35872496
				chr14	35956844	35957680
				chr14	36498107	36499039
				chr14	37555823	37556499
				chr14	37696756	37698073
				chr14	38729002	38729773
				chr14	39720127	39721064
				chr14	40077788	40079328
				chr14	40252825	40253567
				chr14	40767240	40768130
				chr14	40845281	40847595
				chr14	45435232	45436611
				chr14	45453379	45454146
				chr14	47834612	47835826
				chr14	47897043	47898960
				chr14	49628435	49629420
				chr14	49679570	49680511
				chr14	49705840	49707166
				chr14	49708111	49709604
				chr14	49770846	49771899
				chr14	50976667	50977479
				chr14	50982763	50983878
				chr14	51097898	51098770
				chr14	51130430	51131916
				chr14	51427627	51428608
				chr14	51762542	51764048
				chr14	52080290	52081345
				chr14	52365193	52366041
				chr14	53227124	53228664
				chr14	55012651	55013380
				chr14	55081004	55082971
				chr14	55440662	55441817
				chr14	55774694	55777481
				chr14	56479109	56479807
				chr14	56974885	56975695
				chr14	57338596	57339510
				chr14	57356161	57357127
				chr14	57772295	57773301
				chr14	58042906	58043955
				chr14	58205831	58207338
				chr14	58784861	58786503
				chr14	58787157	58788408
				chr14	59611408	59612730
				chr14	60036032	60040008
				chr14	60048624	60051567
				chr14	60200090	60200846
				chr14	62011375	62012151
				chr14	62459845	62461168
				chr14	62641825	62642516
				chr14	62817136	62818159
				chr14	63280945	63281792
				chr14	63338551	63339666
				chr14	63354926	63356321
				chr14	63566954	63568479
				chr14	63655379	63656034
				chr14	64140195	64141062
				chr14	64228380	64229431
				chr14	65381735	65383563
				chr14	65383657	65384432
				chr14	65399197	65400108
				chr14	65489528	65490561
				chr14	65598292	65599725
				chr14	66215996	66216840
				chr14	66285159	66288214
				chr14	66324030	66324787
				chr14	66333784	66336401
				chr14	66336769	66337796
				chr14	66337800	66341664
				chr14	66353995	66354786
				chr14	66354802	66355603
				chr14	66359900	66361487
				chr14	66377812	66378903
				chr14	66409030	66409472
				chr14	66455124	66456201
				chr14	66700616	66703157
				chr14	67171357	67172095
				chr14	68180896	68181714
				chr14	69387004	69389943
				chr14	69422508	69423122
				chr14	69425438	69427285
				chr14	69447347	69448868
				chr14	70618505	70619168
				chr14	70771369	70772408
				chr14	71095833	71096819
				chr14	71098082	71100190
				chr14	71100198	71102481
				chr14	71125554	71126243
				chr14	71134335	71135104
				chr14	73256631	73257218
				chr14	73837403	73838476
				chr14	73960914	73961781
				chr14	73967466	73969222
				chr14	75301212	75301795
				chr14	75536962	75537725
				chr14	75597085	75597931
				chr14	76351925	76352462
				chr14	77211031	77213279
				chr14	78259034	78260278
				chr14	78804476	78805962
				chr14	78819827	78820787
				chr14	78909276	78910622
				chr14	79194770	79195549
				chr14	79256032	79257445
				chr14	79268495	79269330
				chr14	79424728	79425677
				chr14	79797771	79799242
				chr14	79811490	79812283
				chr14	79966886	79969899
				chr14	80015789	80017319
				chr14	80017437	80018416
				chr14	80026791	80030816
				chr14	80879538	80880462
				chr14	85736490	85737725
				chr14	87084713	87085535
				chr14	87163774	87164764
				chr14	87265741	87266538
				chr14	87813867	87815639
				chr14	88654921	88655903
				chr14	88823230	88824919
				chr14	89129823	89130576
				chr14	89463191	89464806
				chr14	89541133	89542031
				chr14	90113070	90113931
				chr14	92268239	92269358
				chr14	93284478	93285134
				chr14	94052981	94053977
				chr14	94103634	94104979
				chr14	95826873	95828400
				chr14	96326769	96328431
				chr14	98103981	98106147
				chr14	98870798	98871674
				chr14	99063399	99064168
				chr14	99128189	99130453
				chr14	99147115	99147671
				chr14	99242901	99244136
				chr14	99598754	99600466
				chr14	99986197	99987615
				chr14	100162314	100163135
				chr14	100557004	100560037
				chr14	101372815	101374235
				chr14	101689893	101690773
				chr14	101943422	101944235
				chr14	102205245	102206454
				chr14	102514045	102515353
				chr14	102865015	102865801
				chr14	103511477	103512988
				chr14	103517955	103518949
				chr14	103557715	103558768
				chr14	105523364	105525532
				chr14	105526484	105528131
				chr14	105541388	105542509
				chr14	105556117	105560427
[truncated: 4,102 more rows]

## Sheet: 7F_HistoneMarks_Female_sites
Supplementary File 7F - Coordinates for each of the sex-biased chromatin mark regions in female liver defined in sheet 7A. Shown is the chromosome, start, and end coordinates for each of the sites indicated (formatted as a 3-column BED file).
Name of genomic sites	Number of sites			Name of genomic sites	Number of sites			Name of genomic sites	Number of sites			Name of genomic sites	Number of sites			Name of genomic sites	Number of sites			Name of genomic sites	Number of sites
K27ac (Female)	1157			K4me1 (Female)	3219			K4me3 (Female)	237			K9me3 (Female)	394			K27me3 (Female)	8			K36me3 (Female)	86
chrom	chromStart	chromEnd		chrom	chromStart	chromEnd		chrom	chromStart	chromEnd		chrom	chromStart	chromEnd		chrom	chromStart	chromEnd		chrom	chromStart	chromEnd
chr1	9634982	9636367		chr1	4533844	4534759		chr1	20467406	20468665		chr1	5437600	5447199		chr11	116599600	116620799		chr1	164805600	164821199
chr1	13427165	13428957		chr1	7299196	7300002		chr1	36837036	36839775		chr1	6283600	6287599		chr12	98170800	98174799		chr1	164882200	164890599
chr1	13436160	13438098		chr1	9626191	9626994		chr1	59417419	59419446		chr1	7784400	7798799		chr17	36289200	36303599		chr1	164891600	164900399
chr1	13453762	13459361		chr1	9639003	9639793		chr1	59419491	59420642		chr1	8037200	8041199		chr19	22922000	22924399		chr1	164907800	164914599
chr1	13476521	13481090		chr1	15916343	15917061		chr1	72919373	72921717		chr1	8598800	8605599		chr2	77705600	77789999		chr1	192059000	192063599
chr1	20467185	20468387		chr1	16362039	16363008		chr1	74959571	74960048		chr1	11648800	11651199		chr2	77808000	77835999		chr10	16598800	16602399
chr1	20471128	20474080		chr1	20140000	20141065		chr1	95031699	95036053		chr1	17018800	17024399		chr2	77842000	77851199		chr10	16693400	16713399
chr1	20642848	20645068		chr1	20747210	20750069		chr1	95056400	95057698		chr1	18200400	18207199		chr8	23725200	23729599		chr10	33481800	33491999
chr1	23417732	23418691		chr1	33863993	33865005		chr1	123423687	123424295		chr1	22522400	22529999						chr10	33496800	33504799
chr1	23922345	23923887		chr1	34362677	34364482		chr1	133673310	133674258		chr1	24658400	24660799						chr10	33532600	33540999
chr1	39161599	39163594		chr1	35879244	35882071		chr1	153794542	153795696		chr1	26013600	26019999						chr10	33578200	33581999
chr1	39249035	39251670		chr1	35935146	35935890		chr1	164826676	164829081		chr1	34651200	34653199						chr10	33583200	33586999
chr1	39463515	39466306		chr1	36174332	36176362		chr1	164911421	164916218		chr1	37098000	37104399						chr10	33588000	33604599
chr1	39486390	39487899		chr1	36864265	36865478		chr1	169304594	169306024		chr1	47174000	47177199						chr10	62542200	62549999
chr1	39527730	39528861		chr1	36866928	36867902		chr1	182114857	182115941		chr1	49716000	49722399						chr10	69428200	69432999
chr1	39639334	39640072		chr1	37117820	37118561		chr1	182155123	182160953		chr1	50076400	50079599						chr11	89843000	89852399
chr1	49629774	49630686		chr1	37574119	37575462		chr10	21777811	21779349		chr1	61489600	61497599						chr12	85396200	85400999
chr1	51345069	51350659		chr1	39155461	39156261		chr10	21867747	21869912		chr1	65757200	65763999						chr13	10864800	10875799
chr1	51845780	51847267		chr1	39340850	39346903		chr10	33577382	33580459		chr1	79836800	79841199						chr13	35058200	35063399
chr1	54909680	54911501		chr1	39556338	39556856		chr10	33624712	33625852		chr1	98251200	98260799						chr13	66531800	66535999
chr1	57424882	57427627		chr1	39729168	39729850		chr10	57700053	57700830		chr1	101840000	101847999						chr14	29833200	29843199
chr1	57427908	57430588		chr1	39882571	39883363		chr10	58937577	58938939		chr1	102357200	102363199						chr15	33126400	33128399
chr1	58532060	58533452		chr1	39974436	39975836		chr10	75242000	75244513		chr1	106251200	106257199						chr15	44533600	44541799
chr1	60538260	60539073		chr1	42922142	42923756		chr10	80476971	80477926		chr1	108314800	108319999						chr15	44543000	44545599
chr1	69680297	69681668		chr1	54886037	54887829		chr10	84220127	84222353		chr1	111057600	111061599						chr15	44559400	44561999
chr1	73719473	73720474		chr1	59420179	59421963		chr10	95021708	95023247		chr1	117248400	117256799						chr15	44563800	44577599
chr1	73972121	73973403		chr1	59477981	59479209		chr10	95119405	95120993		chr1	119656800	119662799						chr15	60725600	60745399
chr1	74714357	74715510		chr1	61203076	61204782		chr10	116330240	116330964		chr1	122705600	122709199						chr15	60746600	60752399
chr1	79747895	79748946		chr1	62635060	62635773		chr10	121884657	121889530		chr1	129077200	129083199						chr15	90976400	90984999
chr1	84718249	84721121		chr1	62947447	62949003		chr10	127303229	127305614		chr1	129410000	129415199						chr15	90997400	91019999
chr1	89825135	89827192		chr1	62975755	62976450		chr11	7050790	7052436		chr1	131857600	131860399						chr16	33171400	33176199
chr1	99499108	99501096		chr1	64577349	64579183		chr11	7097565	7100173		chr1	135756400	135766399						chr16	45412600	45421999
chr1	99503377	99505738		chr1	71747519	71748726		chr11	35732904	35734146		chr1	142636800	142643599						chr16	45429600	45438199
chr1	99510646	99511723		chr1	72241416	72243404		chr11	61047782	61049749		chr1	147976000	147984799						chr16	93369600	93371999
chr1	99609832	99610629		chr1	72785042	72786493		chr11	79085534	79087670		chr1	150256400	150263999						chr18	6941400	6948399
chr1	109534466	109538507		chr1	72959713	72960263		chr11	89863101	89864654		chr1	157946000	157952799						chr19	7853200	7864799
chr1	127291551	127292876		chr1	73679130	73680536		chr11	102076635	102081521		chr1	160836800	160838799						chr19	7865800	7876199
chr1	127292919	127296743		chr1	74214479	74215027		chr11	106907966	106908859		chr1	165954000	165960399						chr19	7936200	7943199
chr1	129259617	129261116		chr1	74396899	74397592		chr11	115322966	115325887		chr1	174868800	174876399						chr19	7953000	7957199
chr1	129291681	129293074		chr1	74417357	74418459		chr11	116180255	116181192		chr1	194131600	194135199						chr19	7983000	7986999
chr1	135959100	135964010		chr1	74465014	74466403		chr11	117138225	117140592		chr1	194389600	194393999						chr19	27303400	27330399
chr1	135967691	135969074		chr1	75168614	75169696		chr12	31759522	31760951		chr10	5262400	5270799						chr19	39463000	39466999
chr1	136002043	136003459		chr1	75182066	75183318		chr12	72976812	72978702		chr10	11049600	11051599						chr19	39586000	39591999
chr1	145337749	145339153		chr1	75309594	75311821		chr12	80867698	80868766		chr10	14724400	14730399						chr19	39598600	39646199
chr1	145455188	145457418		chr1	75666067	75666583		chr12	85393477	85396469		chr10	26154000	26159599						chr19	39847800	39855399
chr1	145478383	145479695		chr1	76006416	76007335		chr12	105625175	105627364		chr10	28778000	28789999						chr19	39859600	39865999
chr1	151709909	151710598		chr1	83743903	83744681		chr12	109507847	109510516		chr10	32327200	32337199						chr19	39867200	39880399
chr1	154119234	154119894		chr1	87794410	87795837		chr12	109995568	109996528		chr10	50203600	50211199						chr19	39915600	39922199
chr1	154120152	154121004		chr1	88961848	88962654		chr12	112104109	112105110		chr10	56850800	56857599						chr19	39923200	39928399
chr1	154385166	154387486		chr1	89448736	89449378		chr12	114389666	114391036		chr10	68418400	68423199						chr19	39929600	39938599
chr1	154532323	154533828		chr1	89685563	89686992		chr13	9010687	9011738		chr10	74356400	74359599						chr19	39940400	39947599
chr1	164884517	164885421		chr1	89688272	89689148		chr13	25189068	25189966		chr10	82685200	82695599						chr19	39952400	39957199
chr1	164886396	164890969		chr1	91395624	91396928		chr13	35055069	35057053		chr10	90981600	90986799						chr19	40067800	40080199
chr1	164891720	164900807		chr1	91413552	91414573		chr13	36821633	36822717		chr10	103086800	103091999						chr2	68212600	68217999
chr1	164902329	164902887		chr1	91513562	91515309		chr13	58907642	58910635		chr10	104758800	104761199						chr2	68238000	68245199
chr1	164907699	164920562		chr1	92057856	92059119		chr13	94309491	94310782		chr10	125470800	125474799						chr3	3637200	3645999
chr1	164938956	164940087		chr1	93506174	93507925		chr13	113125852	113128823		chr11	11643200	11646399						chr3	98676000	98692199
chr1	164984203	164985631		chr1	93515010	93516298		chr14	29831015	29833251		chr11	17821600	17831599						chr3	142365200	142369399
chr1	166561772	166562685		chr1	93605670	93606456		chr14	118420245	118421916		chr11	22465600	22477999						chr4	138888400	138890599
chr1	167256703	167259098		chr1	94013950	94014788		chr15	10106718	10110312		chr11	26756400	26760399						chr5	44391200	44419199
chr1	167259141	167262100		chr1	94038311	94039764		chr15	26740421	26740976		chr11	38800800	38806799						chr5	44423200	44429199
chr1	167435347	167436690		chr1	94039890	94040499		chr15	38631527	38632878		chr11	55468400	55473999						chr5	73045400	73055599
chr1	172069540	172071432		chr1	94040658	94043068		chr15	44577644	44578608		chr11	66662800	66669199						chr5	73057000	73064999
chr1	172071708	172074699		chr1	94843850	94844915		chr15	44578671	44580711		chr11	71707600	71719599						chr5	122311000	122320399
chr1	172623001	172624464		chr1	94958779	94960743		chr15	60750052	60752886		chr11	90702400	90707999						chr5	122321800	122333799
chr1	172624666	172626519		chr1	95110450	95111512		chr15	74785158	74788485		chr11	92932800	92934399						chr5	122342800	122352799
chr1	178938192	178940023		chr1	95122264	95123765		chr15	74788496	74789622		chr11	95787200	95795999						chr5	146385000	146395799
chr1	178942358	178946624		chr1	95125061	95126402		chr15	75253015	75253995		chr12	17030400	17035999						chr6	48842400	48845999
chr1	181573631	181574525		chr1	95142142	95143231		chr15	75259678	75262532		chr12	20829600	20837999						chr7	14320800	14324799
chr1	183179705	183180435		chr1	95157921	95158968		chr15	76981595	76984740		chr12	20876000	20928799						chr7	14350200	14355799
chr1	190833760	190835002		chr1	95266212	95267304		chr15	77033202	77034218		chr12	39400400	39405999						chr7	14362800	14366999
chr1	193335331	193337794		chr1	107309740	107310791		chr15	85922059	85923551		chr12	53269200	53273599						chr7	14383200	14393399
chr1	194387902	194389504		chr1	108054377	108055543		chr15	91019277	91023167		chr12	70529200	70537999						chr7	26863200	26877399
chr1	196389974	196391402		chr1	109214885	109215626		chr15	98506125	98508501		chr12	79577200	79584399						chr7	26878600	26894599
chr10	5678371	5680393		chr1	120519135	120520065		chr16	4669806	4671106		chr12	79991600	79995199						chr7	26961200	26974999
chr10	5718003	5719274		chr1	120539264	120541119		chr16	18052736	18053403		chr12	80962800	80967999						chr7	26980800	26990799
chr10	5813312	5814734		chr1	120545460	120547544		chr16	23971917	23974504		chr12	83650000	83654799						chr7	26991800	27001599
chr10	6640151	6640898		chr1	120554611	120556294		chr16	30184478	30185431		chr12	89327600	89337999						chr9	41774200	41778999
chr10	6750614	6751810		chr1	120568230	120569436		chr16	33019130	33020052		chr12	89354000	89369999						chr9	41781200	41788999
[truncated: 3,140 more rows]
