# Supplementary material for: Plasma growth hormone pulses induce male-biased pulsatile chromatin opening and epigenetic regulation in adult mouse liver
Source: eLife. 2023 Dec 13;12:RP91367. doi: 10.7554/eLife.91367 (PMC10721219; doi:10.7554/eLife.91367)
Supplement: Supplementary file 8. — Raw data from Li et al., 2012 was processed and reanalyzed with MAnorm to identify sex-specific FoxA1 and FoxA2 binding sites in mouse liver. FoxA ChIP-seq samples in male and female liver were defined as samples 1 and 2, respectively. Shown is the MAnorm output which lists the peak coordinates, raw reads, M and A values, and MA-norm p-value for the set of common peaks in each sample and for the peaks unique to each sample. M-values are defined as the log2 fold change and A-values are defined as the average signal strength of the of normalized read densities under comparison. [file elife-91367-supp8.xlsx]

## Sheet: 8A_FoxA1_ChIP-seq
Supplementary File 8A - MAnorm comparative analysis of FoxA1 ChIP-seq peaks between male and female mouse liver. Raw data from (Li et al., 2012) was processed and reanalyzed with MAnorm to identify sex-specific FoxA1 binding sites in mouse liver. FoxA1 ChIP-seq samples in male and female liver were defined as sample 1 and sample 2 respectively. Shown is the MAnorm output which lists the peak coor…
chr	start	end	description	raw_reads_1	raw_reads_2	M_value_rescaled	A_value_rescaled	-log10p-value
chr1	3504591	3505693	merged_common_peak	117	73	0.464393	6.44165	1.34941
chr1	4651560	4652641	merged_common_peak	212	55	1.67921	6.64696	15.3262
chr1	4661329	4661802	unique_peak1	33	15	0.961565	4.48078	1.53513
chr1	4758298	4759774	merged_common_peak	112	88	0.138533	6.545	0.417832
chr1	4774148	4774666	unique_peak1	40	16	1.13172	4.65332	2.15838
chr1	4775163	4776233	unique_peak2	57	67	-0.390961	5.89198	0.712697
chr1	4791563	4792109	unique_peak1	38	27	0.343009	4.97886	0.581177
chr1	4797261	4798619	merged_common_peak	80	99	-0.487737	6.39999	1.30704
chr1	4847214	4848756	merged_common_peak	102	99	-0.157095	6.56531	0.394128
chr1	4867706	4868096	unique_peak1	30	13	1.0271	4.3209	1.65863
chr1	5062025	5063157	unique_peak1	103	33	1.41259	5.79376	6.42819
chr1	5264867	5265018	unique_peak1	3	1	1.01668	1.50834	1.10721
chr1	6203938	6205871	unique_peak2	109	124	-0.388544	6.77151	1.13737
chr1	6501010	6501400	unique_peak1	27	9	1.37246	4.00816	2.17219
chr1	7078129	7080225	merged_common_peak	141	138	-0.190325	7.02378	0.514972
chr1	7094172	7094696	unique_peak1	37	12	1.41418	4.40753	2.8534
chr1	7167621	7169238	unique_peak2	63	71	-0.337962	6.00094	0.634203
chr1	7386573	7388823	merged_common_peak	124	144	-0.426761	6.96653	1.42162
chr1	8407095	8407392	unique_peak1	14	10	0.376079	3.64747	0.446473
chr1	8862938	8863325	unique_peak1	22	16	0.336242	4.25558	0.448201
chr1	9534948	9536849	unique_peak2	89	101	-0.371323	6.48676	0.886377
chr1	9554070	9554469	unique_peak1	36	20	0.685605	4.73512	1.09827
chr1	9555194	9555636	unique_peak1	37	18	0.866693	4.68127	1.50629
chr1	9574707	9575201	unique_peak1	58	27	0.91267	5.26369	2.16967
chr1	9611088	9612286	merged_common_peak	101	93	-0.0812527	6.51396	0.320121
chr1	9620737	9622254	merged_common_peak	118	106	-0.0560082	6.71346	0.310381
chr1	9686996	9687221	unique_peak1	8	3	1.13258	2.56629	1.57097
chr1	9735425	9739117	merged_common_peak	213	220	-0.294892	7.64046	1.17107
chr1	9762906	9763186	unique_peak1	21	12	0.662096	4.03149	0.84084
chr1	9812912	9813258	unique_peak1	23	17	0.312345	4.3261	0.440611
chr1	9897064	9897502	unique_peak1	49	29	0.585375	5.19958	1.05821
chr1	9933634	9935138	merged_common_peak	71	96	-0.605872	6.29698	1.70019
chr1	9937593	9938116	unique_peak1	49	15	1.49227	4.74613	3.70969
chr1	10221896	10223882	unique_peak2	78	114	-0.723775	6.4836	2.60809
chr1	10310274	10310609	unique_peak1	20	8	1.1286	3.73422	1.45476
chr1	12634592	12635142	unique_peak2	6	88	-3.68898	4.63124	18.0453
chr1	12647360	12648206	unique_peak2	29	38	-0.49607	5.03737	0.631312
chr1	13231371	13231774	unique_peak1	46	37	0.159193	5.32752	0.369793
chr1	13277604	13278018	unique_peak1	23	16	0.394807	4.28487	0.507612
chr1	13291581	13292093	unique_peak1	31	17	0.708217	4.52403	0.988723
chr1	13313223	13313654	unique_peak1	48	19	1.14254	4.8932	2.5157
chr1	13363608	13365023	merged_common_peak	130	106	0.0761964	6.77957	0.349624
chr1	13553558	13553917	unique_peak1	24	10	1.07901	3.99894	1.4438
chr1	13566156	13567331	merged_common_peak	75	77	-0.216961	6.17692	0.451948
chr1	13578881	13580653	unique_peak2	75	101	-0.603984	6.37043	1.80558
chr1	13618647	13619087	unique_peak1	37	9	1.79269	4.21827	3.865
chr1	13636525	13636959	unique_peak1	31	9	1.55621	4.10003	2.70612
chr1	13649774	13651373	unique_peak2	90	111	-0.491047	6.56183	1.39844
chr1	13667741	13668106	unique_peak1	30	27	0.0270981	4.8209	0.316544
chr1	13689705	13689964	unique_peak1	13	7	0.740571	3.37029	0.69798
chr1	14633762	14634124	unique_peak1	15	16	-0.163142	4.00589	0.308036
chr1	15598049	15599131	merged_common_peak	66	60	-0.0357374	5.91287	0.30103
chr1	15795353	15797016	merged_common_peak	81	86	-0.26994	6.30797	0.570756
chr1	15823478	15823843	unique_peak1	34	8	1.83153	4.08569	3.64935
chr1	15998269	15998455	unique_peak1	4	7	-0.67626	2.66187	1.01466
chr1	16093572	16096559	unique_peak2	148	224	-0.81895	7.40431	6.059
chr1	16188994	16190102	merged_common_peak	147	71	0.81564	6.57774	3.78768
chr1	16217837	16218925	unique_peak2	36	56	-0.754967	5.45541	1.48072
chr1	16299175	16299496	unique_peak1	19	10	0.771951	3.84541	0.917676
chr1	16300019	16300393	unique_peak1	31	16	0.790679	4.4828	1.12828
chr1	16332586	16333559	merged_common_peak	51	46	-0.00835311	5.55041	0.303365
chr1	16608527	16610019	merged_common_peak	68	82	-0.439564	6.15526	0.973122
chr1	16646264	16647927	unique_peak2	86	105	-0.473469	6.49119	1.31435
chr1	18627363	18627951	merged_common_peak	55	57	-0.209767	5.7531	0.400542
chr1	19169076	19169439	unique_peak1	20	14	0.39163	4.10271	0.532159
chr1	20121814	20122811	merged_common_peak	100	71	0.289854	6.31485	0.696474
chr1	21014611	21015409	unique_peak2	28	38	-0.542721	5.01404	0.70721
chr1	21049777	21050202	unique_peak1	38	35	-0.0195608	5.16014	0.304089
chr1	21059834	21060215	unique_peak1	24	25	-0.161996	4.61944	0.319131
chr1	21070283	21071173	merged_common_peak	111	66	0.535946	6.33406	1.5891
chr1	21122396	21122828	unique_peak1	107	34	1.42271	5.84064	6.65429
chr1	21218784	21219183	unique_peak1	48	18	1.21654	4.8562	2.74343
chr1	21221670	21223347	merged_common_peak	228	142	0.426363	7.37305	1.93251
chr1	21230311	21230931	unique_peak1	63	28	0.973982	5.34497	2.49326
chr1	21236060	21237129	unique_peak1	126	76	0.508204	6.52089	1.65823
chr1	21316745	21317548	unique_peak1	93	46	0.806352	5.95777	2.52959
chr1	21996462	21997292	unique_peak2	29	37	-0.458596	5.01863	0.5725
chr1	22106347	22107605	merged_common_peak	66	69	-0.234283	6.01214	0.437489
chr1	22594767	22595142	unique_peak1	30	17	0.664528	4.50219	0.988723
chr1	22627350	22628366	merged_common_peak	71	49	0.350185	5.81895	0.734682
chr1	22640747	22641002	unique_peak1	16	8	0.837819	3.58883	0.89132
chr1	23003582	23003898	unique_peak1	16	12	0.307305	3.85409	0.42554
chr1	23127687	23128118	unique_peak1	39	21	0.725772	4.82232	1.16837
chr1	23170157	23171333	merged_common_peak	78	52	0.393795	5.92482	0.879827
chr1	23194274	23194636	unique_peak1	33	26	0.206678	4.85823	0.396393
chr1	23260957	23261428	unique_peak1	38	29	0.243474	5.02863	0.465043
chr1	23262324	23263875	unique_peak2	68	109	-0.845884	6.35842	3.28442
chr1	23328248	23328714	unique_peak1	30	12	1.13401	4.26745	1.87884
chr1	23389369	23390814	unique_peak2	48	79	-0.857463	5.8932	2.49385
chr1	23491405	23491822	unique_peak1	36	6	2.27057	3.94264	4.99902
chr1	23712094	23712386	unique_peak1	12	12	-0.0618462	3.66952	0.30103
chr1	23769027	23770234	unique_peak2	28	51	-0.957759	5.22156	1.93089
chr1	23928189	23929581	unique_peak2	71	96	-0.605872	6.29698	1.70019
chr1	24106409	24108027	unique_peak2	39	90	-1.32259	5.8465	5.49284
chr1	24618209	24623544	merged_common_peak	13602	10230	-0.114098	13.2636	6.96323
chr1	24684105	24686791	unique_peak2	121	158	-0.593163	7.0163	2.63625
chr1	24740641	24741250	merged_common_peak	75	52	0.340521	5.89818	0.712697
chr1	26743700	26744979	merged_common_peak	86	68	0.145927	6.18149	0.39759
chr1	27940609	27940978	unique_peak1	39	12	1.48476	4.44282	3.02796
chr1	28911911	28913113	unique_peak2	26	60	-1.28639	5.28754	3.52555
chr1	30929519	30931345	merged_common_peak	128	170	-0.62136	7.10717	3.01115
chr1	30977603	30978116	unique_peak1	31	12	1.1777	4.28929	1.87884
chr1	31005194	31008864	merged_common_peak	201	228	-0.425604	7.6264	2.14297
chr1	31072028	31072518	unique_peak1	142	49	1.29442	6.29106	7.44523
chr1	31076089	31076563	unique_peak1	50	41	0.127198	5.45592	0.363463
chr1	31090353	31091564	merged_common_peak	184	97	0.677917	6.95367	3.40799
chr1	31129259	31130550	merged_common_peak	93	62	0.383661	6.16911	0.906171
chr1	31151274	31153935	merged_common_peak	182	187	-0.27692	7.41613	0.952154
chr1	31209525	31210424	unique_peak2	34	51	-0.698985	5.35095	1.25392
chr1	33098999	33099636	unique_peak1	29	14	0.882441	4.34811	1.33404
chr1	33153706	33154116	unique_peak1	36	9	1.75599	4.19993	3.66464
chr1	33270809	33271132	unique_peak1	55	8	2.47829	4.40907	7.65517
chr1	33271189	33271636	unique_peak1	42	7	2.28472	4.14236	5.62876
chr1	33741349	33741698	unique_peak1	37	16	1.02716	4.60104	1.87578
chr1	33776230	33777408	unique_peak2	33	63	-1.03843	5.48078	2.7145
chr1	33870849	33871812	unique_peak2	28	54	-1.03868	5.26202	2.29326
chr1	33996732	33997004	unique_peak1	12	6	0.831239	3.22297	1.4509
chr1	34053048	34053218	unique_peak1	1	1	0.0628571	1.03143	0.726999
chr1	34062559	34062908	unique_peak1	20	16	0.211058	4.19299	0.397739
chr1	34160520	34160910	unique_peak1	26	14	0.737457	4.27562	0.983973
chr1	34275203	34275585	unique_peak1	22	13	0.61635	4.11553	0.713635
chr1	34292842	34295125	merged_common_peak	135	127	-0.130792	6.9346	0.39005
chr1	34309138	34309504	unique_peak1	30	9	1.51252	4.07819	2.70612
chr1	34443681	34445274	merged_common_peak	230	93	1.04361	7.07639	8.18698
chr1	34456468	34456897	unique_peak1	48	20	1.07215	4.92839	2.30395
chr1	34899277	34900541	unique_peak2	61	75	-0.459653	6.0181	0.971836
chr1	35893078	35894146	merged_common_peak	135	72	0.679383	6.52952	2.6501
chr1	36122892	36123550	unique_peak1	92	51	0.645784	6.02333	1.7946
chr1	36132366	36132808	unique_peak1	63	51	0.131523	5.7662	0.37345
chr1	36150599	36151007	unique_peak1	36	26	0.323035	4.91641	0.533345
chr1	36300333	36301475	unique_peak2	46	65	-0.637274	5.72576	1.38301
chr1	36309645	36310209	unique_peak1	38	31	0.150364	5.07518	0.38213
chr1	36311917	36312346	unique_peak1	40	34	0.0898992	5.17423	0.328564
chr1	36413742	36414172	unique_peak1	38	36	-0.0590892	5.17991	0.30103
chr1	36424417	36426625	merged_common_peak	122	122	-0.211562	6.83673	0.545045
chr1	36522479	36523083	unique_peak1	67	36	0.705933	5.56242	1.61784
chr1	36526472	36529554	merged_common_peak	210	204	-0.205897	7.57653	0.685598
chr1	36567997	36570167	merged_common_peak	145	151	-0.281085	7.10738	0.833673
chr1	36582649	36583000	unique_peak1	28	18	0.494753	4.4953	0.694543
chr1	36593129	36593645	unique_peak1	41	22	0.72878	4.88795	1.23883
chr1	36603455	36604904	merged_common_peak	85	97	-0.376167	6.42663	0.855935
chr1	36613188	36615975	merged_common_peak	118	138	-0.433482	6.9022	1.4087
chr1	36660303	36662457	unique_peak2	67	113	-0.917503	6.37414	3.88418
chr1	36747454	36749328	unique_peak2	89	103	-0.399337	6.50077	0.990271
chr1	36765378	36767179	unique_peak2	66	99	-0.748856	6.26943	2.39962
chr1	36837312	36838119	unique_peak1	80	46	0.60153	5.85535	1.47
chr1	36839318	36839731	unique_peak1	48	32	0.420071	5.25443	0.714194
chr1	36864550	36864997	unique_peak1	37	26	0.359733	4.93475	0.590428
chr1	36976943	36977281	unique_peak1	28	13	0.935326	4.27502	1.38792
chr1	36995740	36997586	unique_peak2	89	125	-0.676177	6.63919	2.57289
chr1	37033582	37034114	unique_peak1	65	26	1.11942	5.3146	3.15755
chr1	37081825	37083779	merged_common_peak	227	142	0.420341	7.37004	1.87241
chr1	37097538	37098816	merged_common_peak	202	140	0.280844	7.27997	0.973138
chr1	37113337	37114828	merged_common_peak	164	145	-0.0546349	7.16251	0.313178
chr1	37289208	37290357	merged_common_peak	45	61	-0.57667	5.66586	1.06648
chr1	37329008	37329960	unique_peak2	44	41	-0.045036	5.3698	0.30103
chr1	37366297	37366586	unique_peak1	15	8	0.754395	3.54712	0.771068
chr1	37398141	37399131	unique_peak1	156	77	0.781397	6.6761	3.68659
chr1	37407837	37408544	unique_peak1	72	61	0.058825	5.98361	0.328609
chr1	37486129	37487708	merged_common_peak	116	122	-0.28038	6.80232	0.731093
chr1	37625337	37625619	unique_peak1	26	6	1.83699	3.72585	3.01816
chr1	37687276	37687700	unique_peak1	35	6	2.23286	3.92379	4.76955
chr1	37920999	37922857	merged_common_peak	80	120	-0.762744	6.53749	3.06148
chr1	37946239	37947813	merged_common_peak	91	105	-0.396573	6.52963	0.975364
chr1	38044849	38045190	unique_peak1	16	8	0.837819	3.58883	0.89132
chr1	38053385	38055535	unique_peak2	108	126	-0.424012	6.77668	1.2484
chr1	38166639	38166982	unique_peak1	27	22	0.170831	4.60898	0.373496
chr1	38175128	38176353	merged_common_peak	117	68	0.565322	6.39119	1.78764
chr1	38185445	38187447	merged_common_peak	115	170	-0.767529	7.03409	4.28723
chr1	38232640	38233786	merged_common_peak	34	53	-0.753433	5.37817	1.43939
chr1	38297300	38300278	merged_common_peak	209	180	-0.0327997	7.48345	0.306504
chr1	38365019	38366156	merged_common_peak	202	83	1.02808	6.90636	7.0607
chr1	38506264	38506704	unique_peak1	53	16	1.51071	4.84282	3.93693
chr1	39043714	39045312	unique_peak2	65	93	-0.680282	6.21445	1.96655
chr1	39119300	39119737	unique_peak1	34	29	0.0945638	4.95417	0.333081
chr1	39124692	39125175	unique_peak1	67	25	1.21495	5.30791	3.52555
chr1	39243886	39244273	unique_peak1	24	6	1.73109	3.6729	2.61001
chr1	39423910	39425725	merged_common_peak	79	123	-0.815172	6.54661	3.50245
chr1	39481928	39483402	merged_common_peak	86	73	0.0449982	6.23195	0.314147
chr1	39501494	39503402	merged_common_peak	89	127	-0.698897	6.65055	2.75217
chr1	39514950	39515382	unique_peak1	67	32	0.870992	5.47989	2.18118
chr1	39534366	39536122	unique_peak2	74	106	-0.691252	6.39584	2.33962
chr1	39572116	39572506	unique_peak1	27	13	0.887038	4.25087	1.26025
chr1	39591987	39593445	merged_common_peak	59	84	-0.666238	6.07627	1.72858
chr1	39633225	39634944	merged_common_peak	134	131	-0.185342	6.95172	0.498958
chr1	39635221	39635668	unique_peak1	54	32	0.579025	5.33391	1.08158
chr1	39648750	39649701	merged_common_peak	87	60	0.339441	6.10046	0.760283
chr1	39812648	39813896	unique_peak2	45	69	-0.751757	5.7534	1.74157
chr1	39959480	39960221	unique_peak1	52	28	0.714466	5.21521	1.45748
chr1	39993283	39993684	unique_peak1	30	21	0.375021	4.64694	0.580177
chr1	40172942	40173972	merged_common_peak	48	46	-0.0901241	5.50953	0.310682
chr1	40212515	40214707	merged_common_peak	257	157	0.446533	7.52705	2.27273
chr1	40219604	40221780	merged_common_peak	172	159	-0.121587	7.26113	0.403243
chr1	40231618	40233383	merged_common_peak	191	115	0.485752	7.10086	2.04113
chr1	40251094	40251497	unique_peak1	21	13	0.555181	4.08495	0.713635
chr1	40281784	40282351	unique_peak1	57	53	-0.0583856	5.72569	0.303098
chr1	40286661	40287023	unique_peak1	40	22	0.69562	4.87137	1.13829
chr1	41612420	41612789	unique_peak1	26	14	0.737457	4.27562	0.983973
chr1	41615988	41616451	unique_peak1	51	28	0.688255	5.20211	1.35771
chr1	42588731	42590209	merged_common_peak	58	64	-0.302343	5.8712	0.525933
chr1	42907346	42908792	unique_peak2	53	84	-0.811222	6.00378	2.46027
chr1	43154743	43156172	unique_peak2	59	84	-0.666238	6.07627	1.72858
chr1	43361815	43362902	merged_common_peak	247	136	0.597884	7.39697	3.51559
chr1	43455795	43456137	unique_peak1	15	8	0.754395	3.54712	0.771068
chr1	43591177	43591661	unique_peak1	77	26	1.3493	5.42954	4.68503
chr1	43834186	43835961	merged_common_peak	105	122	-0.416246	6.73439	1.21728
chr1	43883456	43885475	unique_peak2	89	109	-0.480257	6.54123	1.34502
chr1	43989964	43991427	merged_common_peak	112	124	-0.351518	6.79003	0.963773
chr1	43992483	43992876	unique_peak1	39	16	1.09774	4.63633	2.01523
chr1	44072327	44072731	unique_peak1	25	13	0.78506	4.19988	1.02201
chr1	44174898	44177309	unique_peak2	91	147	-0.878106	6.7704	4.50966
chr1	44204571	44204992	unique_peak1	30	26	0.0795655	4.79467	0.336581
chr1	44254968	44256147	unique_peak2	49	52	-0.235655	5.61009	0.410818
chr1	45007782	45008301	unique_peak2	5	43	-2.8848	4.01703	7.13994
chr1	45702270	45702466	unique_peak1	0	1	-0.890964	0.554518	0.60206
chr1	45851682	45852847	merged_common_peak	72	69	-0.116262	6.07115	0.326962
chr1	45873757	45874133	unique_peak1	29	20	0.397014	4.59082	0.591915
chr1	45954935	45955285	unique_peak1	28	12	1.04224	4.22156	1.58668
chr1	45961751	45962937	merged_common_peak	70	64	-0.0475732	5.99858	0.30274
chr1	45977463	45977913	unique_peak1	33	25	0.261126	4.831	0.440893
chr1	45981072	45983288	merged_common_peak	185	166	-0.0836595	7.34187	0.343928
chr1	45988015	45988363	unique_peak1	30	21	0.375021	4.64694	0.580177
chr1	46132400	46133284	merged_common_peak	30	47	-0.750509	5.20971	1.23562
chr1	46909276	46911423	merged_common_peak	135	155	-0.416195	7.0773	1.45761
chr1	50739671	50740216	unique_peak1	62	27	1.00294	5.30882	2.54839
chr1	51534594	51536005	merged_common_peak	86	136	-0.843581	6.67624	4.03931
chr1	51623910	51624273	unique_peak1	33	21	0.502134	4.7105	0.721234
chr1	51816428	51817113	unique_peak1	111	49	0.958179	6.12295	3.79236
chr1	51826651	51827313	unique_peak1	105	52	0.798348	6.12709	2.7458
chr1	51948752	51949359	unique_peak1	112	49	0.97041	6.12906	3.91655
chr1	51961899	51962275	unique_peak1	31	12	1.1777	4.28929	1.87884
chr1	51971661	51973423	merged_common_peak	94	122	-0.567012	6.65901	1.92202
chr1	52053202	52054173	merged_common_peak	82	46	0.635094	5.87214	1.64294
chr1	52097279	52097550	unique_peak1	11	6	0.721094	3.1679	1.4509
chr1	52169988	52171304	merged_common_peak	63	92	-0.707196	6.18556	2.10309
chr1	52175445	52177255	merged_common_peak	78	106	-0.619752	6.43159	1.91136
chr1	52288700	52290938	unique_peak2	90	111	-0.491047	6.56183	1.39844
chr1	52484936	52485310	unique_peak1	27	13	0.887038	4.25087	1.26025
chr1	52522625	52523144	unique_peak1	38	23	0.565402	4.86766	0.928161
chr1	52531109	52531552	unique_peak1	57	28	0.838521	5.27724	1.88883
chr1	52556296	52558189	unique_peak2	69	119	-0.951615	6.43108	4.26601
chr1	52687007	52688050	unique_peak2	38	61	-0.803832	5.55228	1.71609
chr1	52806820	52807289	unique_peak1	38	33	0.0629014	5.11891	0.329362
chr1	52873440	52874814	unique_peak2	60	69	-0.363385	5.94759	0.699241
chr1	52901615	52902258	unique_peak1	44	35	0.177356	5.2586	0.403996
chr1	52906200	52906657	unique_peak1	70	40	0.617243	5.66617	1.42574
chr1	53115970	53116389	unique_peak1	37	10	1.65519	4.28703	3.4952
chr1	53348128	53348496	unique_peak1	52	24	0.928591	5.10815	2.0719
chr1	53353228	53354412	merged_common_peak	74	75	-0.197713	6.14907	0.425859
chr1	53408950	53409903	unique_peak2	26	52	-1.08357	5.18613	2.40123
chr1	53750989	53751341	unique_peak1	18	7	1.1608	3.5804	1.38887
chr1	53840930	53842193	merged_common_peak	72	63	0.0130213	6.00651	0.307816
chr1	54495681	54496066	unique_peak1	27	22	0.170831	4.60898	0.373496
chr1	54599696	54600088	unique_peak1	30	7	1.83445	3.91723	3.43645
chr1	54613504	54615345	unique_peak2	78	96	-0.478198	6.36081	1.18897
chr1	54671845	54672330	unique_peak1	29	18	0.541404	4.51863	0.77688
chr1	54872258	54872570	unique_peak1	16	10	0.548313	3.73359	0.604423
chr1	54906843	54907173	unique_peak1	14	14	-0.0713799	3.8712	0.30103
chr1	54938938	54940109	unique_peak2	46	60	-0.523617	5.66893	0.994417
chr1	54982251	54983802	unique_peak2	59	100	-0.915059	6.20068	3.33072
chr1	55083014	55084847	merged_common_peak	99	135	-0.641377	6.76677	2.57256
chr1	55108627	55110816	merged_common_peak	133	171	-0.577444	7.13754	2.69751
chr1	55143527	55146269	unique_peak2	146	205	-0.710265	7.33137	4.43512
chr1	55187396	55188962	merged_common_peak	94	105	-0.352417	6.55171	0.861352
chr1	55228534	55229000	unique_peak1	38	36	-0.0590892	5.17991	0.30103
chr1	55293539	55294716	merged_common_peak	68	74	-0.293343	6.08215	0.573288
chr1	55792732	55793792	merged_common_peak	146	82	0.601196	6.67564	2.33752
chr1	56351303	56351574	unique_peak1	12	3	1.63859	2.8193	2.15847
chr1	56596556	56596977	unique_peak1	32	14	1.0136	4.41369	1.59386
chr1	56838610	56839695	merged_common_peak	58	88	-0.755708	6.09788	2.20746
chr1	57326350	57326787	unique_peak1	37	13	1.30727	4.46099	2.57454
chr1	57398026	57398429	unique_peak1	68	17	1.76555	5.0527	6.02074
chr1	57434018	57435576	unique_peak2	61	85	-0.637991	6.10727	1.70786
chr1	57445691	57446073	unique_peak1	31	21	0.41871	4.66879	0.580177
chr1	57462710	57464337	unique_peak2	63	97	-0.782747	6.22334	2.58318
chr1	57598500	57599524	unique_peak2	31	47	-0.706821	5.23155	1.23562
chr1	58026191	58027388	merged_common_peak	62	62	-0.166988	5.89379	0.367307
chr1	58052383	58053609	unique_peak2	35	65	-1.00417	5.54231	2.61214
chr1	58086088	58088823	merged_common_peak	274	166	0.454419	7.61091	2.49229
chr1	58128114	58128701	unique_peak1	51	19	1.22431	4.93408	2.96403
chr1	58134598	58135096	unique_peak1	45	10	1.91809	4.41848	4.89889
chr1	58158290	58158984	unique_peak1	79	48	0.524315	5.87687	1.19693
chr1	58200672	58202046	merged_common_peak	187	102	0.628262	7.00063	3.02605
chr1	58448414	58450970	unique_peak2	94	119	-0.531388	6.6412	1.70168
chr1	58458018	58458982	merged_common_peak	77	57	0.246204	5.98108	0.549575
chr1	58479477	58481315	merged_common_peak	126	115	-0.08299	6.81649	0.325159
chr1	58642191	58643721	merged_common_peak	79	90	-0.36877	6.32341	0.845321
chr1	58667506	58667978	unique_peak1	82	34	1.0604	5.65948	3.46003
chr1	58709220	58710214	unique_peak2	39	58	-0.69744	5.53392	1.42955
chr1	58734229	58735586	unique_peak2	36	55	-0.729432	5.44264	1.38722
chr1	59014620	59015010	unique_peak1	27	7	1.69439	3.8472	2.82905
chr1	59029589	59031525	merged_common_peak	114	122	-0.304106	6.79046	0.775228
chr1	59158961	59159342	unique_peak1	33	11	1.3766	4.27326	2.45535
chr1	59209077	59209444	unique_peak1	23	10	1.02284	3.97085	1.30249
chr1	59231377	59232271	unique_peak1	118	61	0.731262	6.31983	2.66291
chr1	59257819	59260054	merged_common_peak	152	115	0.173305	6.94463	0.527164
chr1	59268943	59269592	unique_peak1	48	19	1.14254	4.8932	2.5157
chr1	59293366	59295459	unique_peak2	112	147	-0.595187	6.91186	2.44349
chr1	59378334	59379194	unique_peak1	91	38	1.04594	5.80837	3.75257
chr1	59424949	59425371	unique_peak1	28	20	0.350363	4.5675	0.528262
chr1	59538022	59541395	merged_common_peak	172	228	-0.638862	7.51977	4.13035
chr1	59555036	59555401	unique_peak1	28	16	0.655218	4.41507	0.918918
chr1	59560167	59561227	merged_common_peak	245	149	0.455955	7.4568	2.29701
chr1	59680231	59680534	unique_peak1	13	13	-0.0667834	3.77396	0.30103
chr1	59741624	59742384	unique_peak2	35	47	-0.544743	5.31259	0.83579
chr1	59819378	59821850	unique_peak2	89	133	-0.764987	6.6836	3.321
chr1	59828789	59829077	unique_peak1	28	14	0.83579	4.32479	1.21174
chr1	59861154	59861553	unique_peak1	29	10	1.3299	4.12438	2.22882
chr1	59969045	59971092	unique_peak2	59	114	-1.10234	6.29432	5.05853
chr1	60154059	60155935	merged_common_peak	78	122	-0.820799	6.53211	3.39772
chr1	60227014	60227428	unique_peak1	26	20	0.252031	4.51833	0.421917
chr1	60236667	60238337	unique_peak2	82	108	-0.578501	6.47893	1.77997
chr1	60326187	60326551	unique_peak1	24	13	0.731089	4.1729	0.912224
chr1	60351130	60351375	unique_peak1	5	8	-0.595297	2.87228	1.03789
chr1	60399364	60400972	unique_peak2	58	101	-0.9524	6.19623	3.60454
chr1	60465731	60467250	unique_peak2	50	84	-0.889876	5.96445	2.74861
chr1	60620835	60621247	unique_peak1	189	66	1.26323	6.69771	9.20584
chr1	60652807	60653653	unique_peak1	117	40	1.31629	6.0157	6.38196
chr1	60655321	60656895	merged_common_peak	129	98	0.177762	6.71824	0.503851
chr1	60716411	60716938	unique_peak1	87	29	1.36329	5.58853	5.19712
chr1	60719081	60719892	unique_peak1	154	84	0.639766	6.72927	2.63672
chr1	60724511	60726654	unique_peak2	107	130	-0.481433	6.79271	1.56285
chr1	60881647	60882132	unique_peak1	75	34	0.939158	5.59886	2.6859
chr1	60902899	60904237	unique_peak2	47	66	-0.629998	5.75109	1.36285
chr1	60916052	60918253	merged_common_peak	213	211	-0.23491	7.61047	0.835295
chr1	61356471	61357795	merged_common_peak	98	79	0.110328	6.37709	0.365536
chr1	61696458	61696856	unique_peak1	35	8	1.87029	4.10507	3.8548
chr1	61892811	61893780	merged_common_peak	141	75	0.680688	6.58827	2.75959
chr1	62099554	62100034	unique_peak1	36	10	1.61849	4.26868	3.30472
chr1	62221622	62222333	unique_peak1	43	34	0.187074	5.22282	0.406785
chr1	62380764	62381157	unique_peak1	55	26	0.893326	5.20155	1.97528
chr1	62434591	62434961	unique_peak1	24	10	1.07901	3.99894	1.4438
chr1	62512165	62512520	unique_peak1	21	16	0.275073	4.225	0.448201
chr1	62545855	62546201	unique_peak1	25	12	0.891975	4.14643	1.18646
chr1	62613212	62613525	unique_peak1	20	9	0.976593	3.81022	1.23014
chr1	62770165	62770900	unique_peak1	70	46	0.420206	5.76469	0.879126
chr1	62777115	62777470	unique_peak1	37	14	1.20773	4.51076	2.32007
chr1	62794807	62795341	unique_peak1	42	26	0.529834	5.0198	0.869438
chr1	62945897	62946409	unique_peak1	77	24	1.46033	5.37402	5.23356
chr1	63185308	63185676	unique_peak1	28	16	0.655218	4.41507	0.918918
chr1	63222611	63224313	merged_common_peak	124	143	-0.416777	6.96154	1.36427
chr1	63238875	63239257	unique_peak1	32	7	1.92049	3.96024	3.645
chr1	63676084	63677658	merged_common_peak	134	179	-0.632801	7.17545	3.2452
chr1	63776392	63777720	merged_common_peak	47	64	-0.586277	5.72923	1.20184
chr1	64166352	64169448	merged_common_peak	221	259	-0.478853	7.78294	2.83608
chr1	64180534	64180761	unique_peak1	4	1	1.32374	1.66187	1.32906
chr1	64578283	64579922	unique_peak2	74	87	-0.409217	6.25482	0.928905
chr1	64662941	64664785	merged_common_peak	92	122	-0.596291	6.64437	2.11161
chr1	64736345	64738160	unique_peak2	80	88	-0.319615	6.31593	0.696474
chr1	64782224	64786089	merged_common_peak	211	233	-0.390275	7.67523	1.84236
chr1	64799739	64800080	unique_peak1	21	23	-0.222426	4.47375	0.320777
chr1	64803854	64804199	unique_peak1	46	36	0.197667	5.30829	0.401351
chr1	64834172	64834623	unique_peak1	47	34	0.306808	5.28269	0.529981
chr1	64841898	64842228	unique_peak1	47	28	0.57811	5.14704	0.994385
chr1	64855692	64856044	unique_peak1	20	24	-0.345335	4.47119	0.380102
chr1	65003121	65003508	unique_peak1	25	19	0.270487	4.45717	0.427564
chr1	65158607	65158909	unique_peak1	13	9	0.418643	3.53125	0.459837
chr1	65223551	65226441	merged_common_peak	283	236	-0.00630639	7.88559	0.30103
chr1	65232412	65233859	merged_common_peak	70	83	-0.417523	6.18356	0.897829
chr1	65384331	65384788	unique_peak1	62	13	2.00294	4.80882	6.57131
chr1	65401204	65401451	unique_peak1	8	0	3.13258	1.56629	3.0103
chr1	66147937	66148430	unique_peak1	50	18	1.27159	4.88372	3.0532
chr1	66597458	66597819	unique_peak1	43	12	1.61592	4.5084	3.75499
chr1	66747138	66748140	unique_peak2	46	55	-0.400235	5.60724	0.680499
chr1	66824533	66824865	unique_peak1	41	12	1.5519	4.47639	3.38598
chr1	66862203	66864739	unique_peak2	100	149	-0.76904	6.8443	3.74901
chr1	66867915	66868157	unique_peak1	17	6	1.27904	3.44688	1.49152
chr1	66908961	66910377	merged_common_peak	101	89	-0.0185169	6.48259	0.30103
chr1	66947176	66948231	merged_common_peak	694	544	0.0238239	9.10202	0.320807
chr1	67045172	67045578	unique_peak1	62	47	0.225329	5.69763	0.472014
chr1	67048646	67049148	unique_peak1	58	36	0.510572	5.46474	1.0105
chr1	67123977	67125137	merged_common_peak	283	156	0.587816	7.58853	3.87132
chr1	67139010	67139544	unique_peak1	84	34	1.09317	5.67587	3.73369
chr1	67149634	67151156	merged_common_peak	186	118	0.412605	7.10112	1.5643
chr1	67159843	67160366	unique_peak1	80	43	0.696687	5.80778	1.80978
chr1	67162724	67163840	merged_common_peak	184	74	1.06381	6.76072	6.92398
chr1	67169090	67170672	merged_common_peak	152	123	0.0770894	6.99274	0.355753
chr1	68002595	68002886	unique_peak1	15	12	0.223881	3.81238	0.373562
chr1	69025816	69026267	unique_peak1	37	23	0.529658	4.84979	0.844068
chr1	69152563	69152950	unique_peak1	38	20	0.758047	4.77134	1.30767
chr1	69503108	69503862	unique_peak2	724	768	-0.414751	9.37946	6.21076
chr1	69900141	69900414	unique_peak1	14	2	2.25055	2.71024	3.03833
chr1	71148642	71150088	unique_peak2	55	88	-0.82752	6.06197	2.60283
chr1	71603249	71604397	unique_peak2	51	72	-0.643589	5.86803	1.45005
chr1	71680951	71681718	unique_peak1	173	62	1.23099	6.59278	8.1783
chr1	71693388	71693792	unique_peak1	44	33	0.259819	5.21737	0.489201
chr1	71698760	71700321	merged_common_peak	105	147	-0.683185	6.86786	3.07423
chr1	71770387	71770771	unique_peak1	52	20	1.18013	4.98238	2.88064
chr1	71854213	71854502	unique_peak1	25	11	1.00745	4.08869	1.37509
chr1	71884484	71884951	unique_peak1	26	24	0.000491883	4.6441	0.305462
chr1	71920590	71920990	unique_peak1	31	15	0.878142	4.43907	1.28534
chr1	71932125	71935646	merged_common_peak	200	243	-0.523967	7.66875	3.11769
chr1	71958670	71959894	merged_common_peak	93	73	0.151488	6.2852	0.414571
chr1	71983697	71984141	unique_peak1	37	27	0.307265	4.96099	0.525808
chr1	72011000	72011282	unique_peak1	20	14	0.39163	4.10271	0.532159
chr1	72059258	72059686	unique_peak1	54	16	1.53596	4.85544	4.11414
chr1	72169969	72170762	unique_peak2	29	44	-0.702521	5.14059	1.07959
chr1	72218985	72220637	merged_common_peak	175	101	0.551574	6.94821	2.31474
chr1	72272081	72273410	merged_common_peak	118	115	-0.172522	6.77172	0.444539
chr1	72282537	72284213	merged_common_peak	78	93	-0.432874	6.33815	1.00812
chr1	72289972	72291394	merged_common_peak	111	106	-0.139432	6.67175	0.387703
chr1	72300923	72302657	merged_common_peak	143	134	-0.128954	7.01234	0.403298
chr1	72309338	72310048	unique_peak1	57	49	0.0526457	5.67018	0.320383
chr1	72335051	72335503	unique_peak1	63	37	0.584035	5.53995	1.23216
chr1	72353478	72354793	merged_common_peak	61	67	-0.299189	5.93787	0.55775
chr1	72381369	72381834	unique_peak1	36	18	0.829995	4.66293	1.3876
chr1	72629490	72630655	unique_peak2	55	60	-0.282524	5.78948	0.498709
chr1	72745516	72745847	unique_peak1	27	5	2.10943	3.63968	3.6849
chr1	72757277	72758707	merged_common_peak	93	89	-0.130912	6.4264	0.363271
chr1	72771693	72773359	merged_common_peak	227	161	0.240362	7.46003	0.85691
chr1	72819072	72820766	merged_common_peak	176	105	0.503875	6.97986	2.0345
chr1	72838252	72839196	unique_peak1	98	48	0.817546	6.02348	2.67345
chr1	72855673	72857333	merged_common_peak	215	135	0.418349	7.29664	1.8198
chr1	72869893	72872428	merged_common_peak	140	156	-0.37573	7.10676	1.26391
chr1	72889252	72889608	unique_peak1	34	23	0.416492	4.79321	0.622271
chr1	72924160	72925107	unique_peak2	30	45	-0.689109	5.17901	1.05821
chr1	73676776	73677270	unique_peak1	52	41	0.18013	5.48238	0.420707
chr1	73947640	73949583	merged_common_peak	67	111	-0.891968	6.36137	3.65475
chr1	74055520	74056031	unique_peak1	69	50	0.28285	5.81385	0.580756
chr1	74058445	74061971	merged_common_peak	500	421	-0.0575595	8.69232	0.368334
chr1	74073992	74074388	unique_peak1	30	29	-0.0724376	4.87067	0.30103
chr1	74090931	74091450	unique_peak1	57	44	0.204649	5.59418	0.445963
chr1	74105276	74105774	unique_peak1	67	56	0.0824966	5.87414	0.330987
chr1	74106126	74106588	unique_peak1	56	49	0.0287134	5.65821	0.309716
chr1	74129446	74129813	unique_peak1	30	24	0.190597	4.73915	0.40361
chr1	74170495	74172319	unique_peak2	52	96	-1.02747	6.08618	3.84277
chr1	74243150	74243877	unique_peak1	60	37	0.517971	5.50691	0.99472
chr1	74276116	74277186	merged_common_peak	67	55	0.108032	5.86137	0.348251
chr1	74282341	74283969	unique_peak2	71	116	-0.876324	6.4322	3.61002
chr1	74359620	74360607	unique_peak2	29	58	-1.09331	5.33599	2.62199
chr1	74382063	74382365	unique_peak1	22	22	-0.0998571	4.47363	0.30608
chr1	74386817	74387791	unique_peak1	81	63	0.173003	6.0865	0.431415
chr1	74414258	74415927	unique_peak2	43	84	-1.09303	5.86287	3.76632
chr1	74425596	74426008	unique_peak1	38	23	0.565402	4.86766	0.928161
chr1	74432831	74434043	merged_common_peak	74	91	-0.473347	6.28689	1.16916
chr1	74443581	74444664	unique_peak1	123	112	-0.0780837	6.78114	0.325821
chr1	74551930	74553668	unique_peak2	86	107	-0.500436	6.50467	1.44687
chr1	74633559	74635480	unique_peak2	81	114	-0.672487	6.50925	2.37829
chr1	74744431	74746014	merged_common_peak	124	115	-0.104833	6.80556	0.348752
chr1	74757767	74761717	merged_common_peak	194	240	-0.547821	7.63898	3.33444
chr1	74767557	74770182	merged_common_peak	276	182	0.332395	7.6819	1.51813
chr1	74804957	74805285	unique_peak1	20	16	0.211058	4.19299	0.397739
chr1	74853902	74855347	merged_common_peak	92	96	-0.253689	6.47307	0.577396
chr1	74947087	74948244	merged_common_peak	70	71	-0.19513	6.07236	0.404804
chr1	75008213	75008675	unique_peak1	39	11	1.60024	4.38508	3.34305
chr1	75018176	75018608	unique_peak1	62	31	0.810292	5.40515	1.88321
chr1	75056730	75057198	unique_peak1	75	28	1.21046	5.46321	3.88257
chr1	75091133	75091376	unique_peak1	9	11	-0.307401	3.43126	0.311374
chr1	75094725	75095026	unique_peak1	19	16	0.143919	4.15942	0.356936
chr1	75120353	75121873	unique_peak2	87	86	-0.172765	6.35656	0.408992
chr1	75137079	75140250	merged_common_peak	201	255	-0.5864	7.7068	4.01755
chr1	75144035	75144816	unique_peak1	94	79	0.0535749	6.34872	0.322479
chr1	75145112	75145800	unique_peak1	56	49	0.0287134	5.65821	0.309716
chr1	75175923	75177300	unique_peak2	57	92	-0.842657	6.11783	2.7458
chr1	75187977	75189561	unique_peak2	77	94	-0.46567	6.33702	1.13695
chr1	75210998	75211745	unique_peak1	137	84	0.479906	6.64934	1.61797
chr1	75232267	75234027	unique_peak2	96	120	-0.514691	6.66152	1.605
chr1	75247991	75248585	unique_peak1	44	48	-0.267428	5.481	0.420707
chr1	75312537	75315139	unique_peak2	97	166	-0.965418	6.901	5.91246
chr1	75334352	75334797	unique_peak1	44	8	2.17736	4.2586	5.58075
chr1	75456909	75459427	unique_peak2	95	134	-0.686903	6.73336	2.81356
chr1	75517495	75519075	merged_common_peak	89	80	-0.0387475	6.32048	0.302396
chr1	75535288	75535765	unique_peak1	46	15	1.40712	4.70356	3.19271
chr1	75537029	75537393	unique_peak1	26	13	0.836993	4.22585	1.13816
chr1	75555767	75556696	unique_peak2	50	44	0.0276619	5.50568	0.310682
chr1	75584380	75585373	merged_common_peak	82	59	0.282793	6.04829	0.624068
chr1	75656542	75657923	merged_common_peak	226	124	0.608379	7.26997	3.41932
chr1	75689400	75690381	merged_common_peak	77	59	0.197295	6.00554	0.470849
chr1	76046919	76047270	unique_peak1	32	5	2.33552	3.75272	4.60319
chr1	76193707	76193983	unique_peak1	21	2	2.77757	2.97375	4.27364
chr1	76370522	76370839	unique_peak1	15	3	1.92432	2.96216	2.80788
chr1	76907728	76908612	merged_common_peak	57	41	0.304185	5.54441	0.584217
chr1	76915665	76916810	merged_common_peak	82	67	0.10222	6.13857	0.356885
chr1	76939088	76940002	merged_common_peak	63	57	-0.0260183	5.84497	0.30103
chr1	77169477	77169858	unique_peak1	26	8	1.47442	3.90714	2.29728
chr1	78139639	78140196	unique_peak1	60	7	2.7659	4.38295	9.22369
chr1	78484673	78485854	unique_peak2	41	71	-0.917583	5.71113	2.50493
chr1	78533386	78533772	unique_peak1	30	21	0.375021	4.64694	0.580177
chr1	78533790	78535638	merged_common_peak	93	109	-0.420418	6.57115	1.13261
chr1	78570053	78571578	merged_common_peak	80	119	-0.750772	6.5315	2.96298
chr1	78583502	78583952	unique_peak1	54	19	1.30149	4.97267	3.27639
chr1	78646221	78646661	unique_peak1	68	27	1.12812	5.37142	3.22914
chr1	78653805	78655850	merged_common_peak	102	141	-0.662986	6.81825	2.76631
chr1	78673653	78673901	unique_peak1	11	9	0.206521	3.42519	0.394412
chr1	78690168	78690578	unique_peak1	29	16	0.701869	4.4384	1.02078
chr1	79412915	79413335	unique_peak1	47	9	2.11416	4.37901	5.54974
chr1	79462750	79463849	merged_common_peak	129	65	0.762725	6.42576	3.04386
chr1	79746609	79747058	unique_peak1	33	26	0.206678	4.85823	0.396393
chr1	79757588	79758738	unique_peak2	55	75	-0.599714	5.94807	1.39412
chr1	79772195	79773398	merged_common_peak	98	99	-0.2116	6.53806	0.499561
chr1	80336372	80338182	unique_peak2	72	108	-0.755163	6.3906	2.64638
chr1	80424522	80424916	unique_peak1	51	14	1.63935	4.72656	4.39313
chr1	81900702	81900972	unique_peak1	11	4	1.20652	2.92519	1.85744
chr1	81947481	81947793	unique_peak1	17	11	0.501436	3.83568	0.582396
chr1	82029012	82029394	unique_peak1	19	12	0.530943	3.96591	0.647241
chr1	82154844	82156529	merged_common_peak	191	105	0.615813	7.03583	2.96384
chr1	82164141	82166259	merged_common_peak	202	115	0.562414	7.13919	2.69751
chr1	82176940	82177393	unique_peak1	48	20	1.07215	4.92839	2.30395
chr1	82179587	82181757	merged_common_peak	183	126	0.296484	7.13693	0.995366
chr1	82185150	82185805	unique_peak1	74	25	1.34978	5.37533	4.46039
chr1	82231199	82231596	unique_peak1	41	21	0.792911	4.85589	1.37991
chr1	82234891	82235357	unique_peak1	55	26	0.893326	5.20155	1.97528
chr1	82254876	82255333	unique_peak1	54	27	0.816064	5.21539	1.70391
chr1	82285579	82288691	merged_common_peak	163	197	-0.502532	7.37809	2.40463
chr1	82312348	82313678	unique_peak2	53	78	-0.705612	5.95097	1.86708
chr1	82638072	82638595	unique_peak1	40	21	0.759751	4.83931	1.27202
chr1	82721118	82722476	unique_peak2	58	65	-0.324369	5.88221	0.566482
chr1	82783886	82784237	unique_peak1	24	17	0.368519	4.35418	0.497202
chr1	82812236	82813192	merged_common_peak	61	46	0.233685	5.67143	0.475409
chr1	82819309	82819707	unique_peak1	27	1	3.69439	2.8472	6.57133
chr1	82835470	82836866	unique_peak2	54	88	-0.852314	6.04958	2.7455
chr1	83939711	83940062	unique_peak1	25	14	0.685524	4.24965	0.879255
chr1	84044735	84045056	unique_peak1	18	6	1.35344	3.48408	1.66449
chr1	84237621	84238445	unique_peak1	124	39	1.43122	6.03754	7.61808
chr1	84250455	84250864	unique_peak1	34	12	1.30101	4.35095	2.34941
chr1	84274632	84276308	merged_common_peak	550	310	0.513673	8.53761	5.49982
chr1	84282113	84282714	unique_peak1	76	34	0.957146	5.60786	2.80976
chr1	84396266	84396752	unique_peak1	51	16	1.45877	4.81685	3.76198
chr1	84406072	84406418	unique_peak1	19	7	1.23138	3.61569	1.55051
chr1	84415981	84416635	unique_peak1	54	15	1.62342	4.81171	4.43241
chr1	84718359	84719664	merged_common_peak	52	64	-0.44992	5.79741	0.799069
chr1	84835384	84837174	merged_common_peak	92	123	-0.607973	6.65021	2.19221
chr1	84868743	84869066	unique_peak1	24	21	0.0790124	4.49894	0.320777
chr1	85101617	85102332	unique_peak1	60	29	0.859008	5.33639	1.96184
chr1	85282880	85284681	merged_common_peak	107	96	-0.0479225	6.57595	0.305602
chr1	87348215	87348943	unique_peak1	63	44	0.34011	5.66191	0.665385
chr1	87405335	87405638	unique_peak1	9	9	-0.044367	3.29974	1.05503
chr1	87689547	87691378	unique_peak2	82	91	-0.333879	6.35662	0.730894
chr1	87749885	87750218	unique_peak1	16	20	-0.384573	4.20003	0.397739
chr1	87936629	87937135	unique_peak1	123	49	1.09824	6.19298	5.09794
chr1	87942241	87944109	unique_peak2	87	115	-0.587803	6.56408	1.94499
chr1	87952165	87954757	merged_common_peak	224	212	-0.172724	7.64835	0.587648
chr1	87955345	87955835	unique_peak1	59	40	0.385601	5.55035	0.755494
chr1	88254817	88257154	unique_peak2	95	184	-1.14147	6.96065	8.60288
chr1	88302958	88304212	merged_common_peak	77	68	-0.00433913	6.10635	0.302615
chr1	88336703	88340039	unique_peak2	151	215	-0.732625	7.38857	4.8957
chr1	88365581	88368568	merged_common_peak	132	173	-0.60443	7.14073	2.95366
chr1	88375370	88376423	merged_common_peak	201	169	0.00420885	7.4115	0.301671
chr1	88383151	88385774	merged_common_peak	148	207	-0.705608	7.34764	4.38481
chr1	88421123	88426451	merged_common_peak	343	447	-0.66117	8.47677	8.37026
chr1	88483221	88484340	merged_common_peak	61	66	-0.277815	5.92718	0.518477
chr1	88491468	88492945	merged_common_peak	130	122	-0.124851	6.88009	0.375895
chr1	88504565	88505137	unique_peak1	55	29	0.741323	5.27755	1.5279
chr1	88565670	88567435	unique_peak2	67	86	-0.527557	6.17917	1.31183
chr1	88599462	88600978	merged_common_peak	77	110	-0.690231	6.4493	2.35849
chr1	88609658	88610071	unique_peak1	34	16	0.913992	4.54446	1.48161
chr1	88635248	88635533	unique_peak1	8	1	2.13258	2.06629	2.31133
chr1	88775634	88776653	unique_peak2	39	57	-0.672778	5.52159	1.33966
chr1	88779170	88779555	unique_peak1	30	28	-0.023528	4.84622	0.30484
chr1	88916407	88916987	unique_peak1	67	24	1.27153	5.27962	3.76223
chr1	88928908	88929446	unique_peak1	60	26	1.01101	5.26039	2.4748
chr1	89109797	89111475	unique_peak2	77	105	-0.623735	6.41605	1.93014
chr1	89222843	89224358	unique_peak2	64	97	-0.761412	6.234	2.45495
chr1	89256898	89257246	unique_peak1	38	6	2.34301	3.97886	5.46362
chr1	89469396	89472469	merged_common_peak	246	240	-0.222533	7.80162	0.830535
chr1	89651897	89653350	unique_peak2	70	78	-0.328986	6.13929	0.648198
chr1	89668265	89668646	unique_peak1	24	20	0.146127	4.46538	0.346516
chr1	89669924	89670339	unique_peak1	50	29	0.612624	5.2132	1.14509
chr1	89676247	89676771	unique_peak1	44	24	0.703425	4.99557	1.27782
chr1	89694849	89695246	unique_peak1	24	24	-0.105412	4.59115	0.30565
chr1	89797553	89798034	unique_peak1	38	20	0.758047	4.77134	1.30767
chr1	89889379	89889629	unique_peak1	15	13	0.116966	3.86584	0.332077
chr1	89909931	89912984	merged_common_peak	289	162	0.562478	7.62997	3.68572
chr1	89921464	89921922	unique_peak1	62	39	0.488364	5.56611	0.965186
chr1	89936978	89937611	unique_peak1	79	34	1.00974	5.63415	3.06383
chr1	89938801	89939290	unique_peak1	64	19	1.53137	5.08761	4.7957
chr1	89941278	89941946	unique_peak1	106	64	0.516822	6.28078	1.47093
chr1	89945486	89946194	unique_peak1	119	56	0.864084	6.26493	3.47663
chr1	89960533	89961135	unique_peak1	57	53	-0.0583856	5.72569	0.303098
chr1	89970834	89971409	unique_peak1	58	42	0.29376	5.57314	0.578228
chr1	90016812	90017951	unique_peak2	46	61	-0.547076	5.68066	1.06648
chr1	90059289	90059794	unique_peak1	44	29	0.440391	5.12709	0.749947
chr1	90068660	90069098	unique_peak1	64	26	1.09841	5.30409	3.01622
chr1	90076067	90076691	unique_peak1	66	26	1.14011	5.32494	3.30112
chr1	90103276	90103941	unique_peak1	99	47	0.861124	6.01552	2.93378
chr1	90107978	90112966	unique_peak1	995	846	-0.117122	9.66766	0.865069
chr1	90119615	90121527	unique_peak1	422	301	0.192257	8.33453	0.952304
chr1	90148551	90150686	unique_peak1	292	338	-0.479773	8.16525	3.68929
chr1	90162905	90166941	unique_peak1	711	615	-0.119596	9.20699	0.724418
chr1	90172234	90177390	unique_peak1	1328	1003	0.0344599	9.98877	0.367854
chr1	90179831	90186036	unique_peak1	1143	977	-0.133955	9.86671	1.16109
chr1	90196860	90198805	unique_peak1	182	140	0.138118	7.20861	0.466722
chr1	90302829	90304229	merged_common_peak	186	94	0.737568	6.93864	3.86949
chr1	90315467	90315976	unique_peak1	52	30	0.618251	5.26332	1.21121
chr1	90318652	90319057	unique_peak1	83	27	1.39881	5.50676	5.23857
chr1	90456144	90456573	unique_peak1	66	23	1.31004	5.23998	4.01185
chr1	90602332	90602690	unique_peak1	29	27	-0.0180231	4.79834	0.304978
chr1	90656645	90656992	unique_peak1	19	3	2.23138	3.11569	3.11807
chr1	90851018	90852156	merged_common_peak	243	169	0.26415	7.54147	1.01523
chr1	90922707	90923099	unique_peak1	31	18	0.630214	4.56303	0.865287
chr1	90965900	90967250	unique_peak2	65	68	-0.234218	5.99142	0.439642
chr1	91000963	91001413	unique_peak1	77	32	1.05979	5.57429	3.31399
chr1	91185092	91185485	unique_peak1	26	5	2.05939	3.61466	3.46164
chr1	91241088	91241485	unique_peak1	25	13	0.78506	4.19988	1.02201
chr1	91350726	91353425	unique_peak2	112	149	-0.614552	6.92154	2.6042
chr1	91412358	91412749	unique_peak1	29	30	-0.164864	4.87176	0.316009
chr1	91542602	91543933	unique_peak2	54	69	-0.505864	5.87635	1.04069
chr1	91792122	91793125	unique_peak2	33	57	-0.896416	5.40977	1.99427
chr1	91806358	91806937	unique_peak1	98	30	1.47806	5.69323	6.42389
chr1	91815829	91816195	unique_peak1	28	11	1.15772	4.16382	1.81053
chr1	92131103	92131651	unique_peak1	52	30	0.618251	5.26332	1.21121
chr1	92301109	92302128	merged_common_peak	160	60	1.17068	6.51608	7.01389
chr1	92499588	92500691	unique_peak2	50	69	-0.609768	5.8244	1.30668
chr1	93146172	93148437	merged_common_peak	140	136	-0.179141	7.00846	0.491248
chr1	93197866	93198595	unique_peak1	65	36	0.664853	5.54188	1.5223
chr1	93213911	93214697	unique_peak1	95	67	0.302449	6.23869	0.717512
chr1	93294673	93295864	unique_peak2	57	69	-0.432781	5.91289	0.821391
chr1	93308475	93311347	merged_common_peak	192	238	-0.549985	7.62587	3.36506
chr1	93316186	93319784	merged_common_peak	270	268	-0.253502	7.94471	1.07737
chr1	93332868	93333658	unique_peak1	70	79	-0.347133	6.14836	0.693339
chr1	93352988	93353484	unique_peak1	96	68	0.295648	6.25635	0.712045
chr1	93390336	93392158	unique_peak2	68	92	-0.603683	6.23732	1.67443
chr1	93435978	93438277	merged_common_peak	129	165	-0.567921	7.09108	2.51671
chr1	93718543	93720550	merged_common_peak	110	110	-0.204723	6.69205	0.507795
chr1	93770882	93771844	unique_peak2	39	57	-0.672778	5.52159	1.33966
chr1	93779346	93780458	merged_common_peak	159	116	0.222481	6.98161	0.679971
chr1	93884778	93886184	merged_common_peak	191	126	0.355049	7.16621	1.28075
chr1	93983574	93985149	merged_common_peak	137	93	0.334708	6.72194	0.995189
chr1	93996930	93997508	unique_peak1	65	41	0.481989	5.63331	1.00844
chr1	94076060	94078083	merged_common_peak	91	122	-0.611167	6.63693	2.11161
chr1	94369635	94370854	unique_peak2	64	73	-0.356156	6.03138	0.674812
chr1	94537973	94539374	unique_peak2	48	71	-0.70546	5.81719	1.69049
chr1	94606816	94607327	unique_peak1	54	32	0.579025	5.33391	1.08158
chr1	94620542	94622073	merged_common_peak	77	73	-0.105268	6.15682	0.325501
chr1	94830251	94833813	merged_common_peak	183	237	-0.60965	7.58999	3.95234
chr1	94925365	94926624	merged_common_peak	82	70	0.0399361	6.16972	0.314698
chr1	95019749	95020136	unique_peak1	37	26	0.359733	4.93475	0.590428
chr1	95024756	95025345	unique_peak1	80	62	0.178839	6.0667	0.433379
chr1	95029212	95029689	unique_peak1	56	51	-0.0278701	5.6865	0.30103
chr1	95131608	95133652	merged_common_peak	118	166	-0.698246	7.03458	3.53491
chr1	95202388	95202710	unique_peak1	22	17	0.25378	4.29681	0.39263
chr1	95238940	95240794	unique_peak2	94	112	-0.444676	6.59784	1.24103
chr1	95274977	95275342	unique_peak1	21	9	1.04061	3.84223	1.37308
chr1	95341132	95343159	unique_peak2	90	146	-0.883364	6.75799	4.54802
chr1	95374202	95376573	merged_common_peak	165	213	-0.597963	7.44249	3.50324
chr1	95407953	95409580	merged_common_peak	102	109	-0.294598	6.63406	0.695551
chr1	95531096	95533182	unique_peak2	102	160	-0.844156	6.90884	4.61455
chr1	95564962	95565915	merged_common_peak	54	55	-0.183936	5.71539	0.376238
chr1	95574871	95575257	unique_peak1	30	19	0.512525	4.57819	0.756751
chr1	95650212	95652104	merged_common_peak	109	145	-0.612585	6.88353	2.57963
chr1	95698011	95701504	unique_peak2	157	233	-0.794828	7.47295	6.03706
chr1	95721121	95722575	merged_common_peak	100	115	-0.398202	6.65888	1.08315
chr1	96835833	96836134	unique_peak1	18	7	1.1608	3.5804	1.38887
chr1	96934940	96935265	unique_peak1	21	14	0.455645	4.13471	0.607096
chr1	97209712	97211378	unique_peak2	66	92	-0.644159	6.21708	1.77492
chr1	97213463	97213959	unique_peak1	93	36	1.15149	5.7852	4.30012
chr1	99557031	99559315	merged_common_peak	111	146	-0.597638	6.90085	2.46137
chr1	99665497	99667243	merged_common_peak	119	116	-0.173391	6.78367	0.443233
chr1	99815025	99815428	unique_peak1	35	17	0.870295	4.60507	1.43262
chr1	101057182	101057556	unique_peak1	45	2	3.79256	3.48124	10.013
chr1	101874893	101875281	unique_peak1	27	19	0.372465	4.50816	0.538442
chr1	102076567	102077305	merged_common_peak	32	46	-0.634103	5.23754	1.03797
chr1	102278734	102279154	unique_peak1	52	20	1.18013	4.98238	2.88064
chr1	102281644	102282090	unique_peak1	46	9	2.08519	4.36452	5.33213
chr1	102446118	102446537	unique_peak1	33	9	1.63964	4.14175	3.08023
chr1	102551804	102552165	unique_peak1	23	4	2.16034	3.4021	3.28004
chr1	102579315	102579705	unique_peak1	29	5	2.20437	3.68715	4.13933
chr1	102603422	102603873	unique_peak1	49	10	2.03283	4.47585	5.53229
chr1	102606345	102606778	unique_peak1	58	6	2.91267	4.26369	9.63706
chr1	104414594	104414989	unique_peak1	39	5	2.60024	3.88508	6.04086
chr1	104524334	104525065	merged_common_peak	42	81	-1.07283	5.82114	3.56169
chr1	104631989	104632311	unique_peak1	20	1	3.29852	2.64926	4.87665
chr1	105658627	105658985	unique_peak1	21	8	1.19261	3.76623	1.61268
chr1	105741024	105741438	unique_peak2	17	25	-0.614041	4.39342	0.633951
chr1	106502018	106502352	unique_peak1	20	13	0.491166	4.05294	0.625923
chr1	106835476	106836451	merged_common_peak	105	45	1.00271	6.02492	3.87446
chr1	107001800	107002090	unique_peak1	17	10	0.626967	3.77292	0.69965
chr1	107009750	107010146	unique_peak1	85	58	0.3559	6.06059	0.827663
chr1	107011009	107012184	merged_common_peak	262	158	0.463844	7.5448	2.45373
chr1	107012821	107013112	unique_peak1	33	29	0.0546749	4.93423	0.315509
chr1	107074641	107076897	merged_common_peak	187	134	0.237947	7.19579	0.764792
chr1	107190119	107190524	unique_peak1	29	20	0.397014	4.59082	0.591915
chr1	107252539	107254080	merged_common_peak	74	118	-0.844603	6.47252	3.53605
chr1	107257587	107257990	unique_peak1	32	15	0.920486	4.46024	1.40782
chr1	107280158	107281964	merged_common_peak	200	157	0.10299	7.35528	0.413286
chr1	107559446	107561444	unique_peak2	74	105	-0.677706	6.38907	2.2496
chr1	107614746	107615521	merged_common_peak	68	56	0.102586	5.88418	0.347443
chr1	107623792	107624151	unique_peak1	18	8	0.990874	3.66536	1.15813
chr1	107781716	107782161	unique_peak1	81	24	1.52915	5.40843	5.75488
chr1	107796785	107797787	unique_peak1	92	52	0.618303	6.03707	1.68521
chr1	107803650	107805900	merged_common_peak	214	167	0.107108	7.44587	0.423364
chr1	107822104	107822745	unique_peak1	85	43	0.779111	5.84899	2.31449
chr1	107823483	107824016	unique_peak1	78	43	0.662284	5.79057	1.71556
chr1	107850319	107851251	merged_common_peak	261	106	1.03002	7.25648	8.8841
chr1	107886015	107888813	unique_peak2	122	208	-0.976406	7.21916	7.62813
chr1	108051797	108052208	unique_peak1	67	23	1.33042	5.25017	4.01185
chr1	108067582	108070506	merged_common_peak	166	209	-0.562476	7.43301	3.09528
chr1	108085413	108085805	unique_peak1	33	22	0.438003	4.74256	0.63451
chr1	108089483	108090165	unique_peak1	83	46	0.651574	5.88038	1.73289
chr1	108655319	108657022	merged_common_peak	94	142	-0.784368	6.76769	3.70014
chr1	108692438	108693848	unique_peak2	54	70	-0.526328	5.88658	1.10998
chr1	109509998	109511173	merged_common_peak	65	51	0.173867	5.78737	0.427482
chr1	109921301	109921532	unique_peak1	7	2	1.38554	2.27773	1.65812
chr1	114844466	114844867	unique_peak1	38	14	1.24347	4.52863	2.47671
chr1	115090727	115091061	unique_peak1	19	1	3.23138	2.61569	4.59735
chr1	116540318	116541246	merged_common_peak	33	56	-0.871325	5.39723	1.88321
chr1	116765209	116765595	unique_peak1	28	3	2.74268	3.37134	5.09648
chr1	116772433	116772728	unique_peak1	18	1	3.1608	2.5804	4.74185
chr1	118642910	118643807	merged_common_peak	34	66	-1.06463	5.53377	2.91651
chr1	119316670	119316986	unique_peak1	20	6	1.49117	3.55294	2.02801
chr1	120207214	120208277	merged_common_peak	55	60	-0.282524	5.78948	0.498709
chr1	120217927	120219110	unique_peak2	50	66	-0.546574	5.7928	1.08073
chr1	120231393	120231952	unique_peak1	51	27	0.738881	5.1768	1.48952
chr1	120285076	120286436	merged_common_peak	65	81	-0.483245	6.11593	1.05486
chr1	120299647	120299972	unique_peak1	22	6	1.61635	3.61553	2.21753
chr1	120355394	120356814	merged_common_peak	125	82	0.389073	6.56958	1.13261
chr1	120510202	120510631	unique_peak1	49	20	1.09995	4.94229	2.44377
chr1	120708678	120709073	unique_peak1	38	13	1.34301	4.47886	2.74005
chr1	120774779	120775135	unique_peak1	28	11	1.15772	4.16382	1.81053
chr1	120863764	120864222	unique_peak1	39	29	0.278313	5.04605	0.465043
chr1	120990420	120990700	unique_peak1	20	16	0.211058	4.19299	0.397739
chr1	121043294	121043718	unique_peak1	35	25	0.33978	4.87033	0.541406
chr1	121069979	121070347	unique_peak1	27	24	0.0505364	4.66912	0.318406
chr1	121087383	121088623	merged_common_peak	307	177	0.518338	7.7349	3.37602
chr1	121190300	121190851	unique_peak1	71	41	0.601723	5.69318	1.40396
chr1	121191374	121192453	merged_common_peak	175	111	0.416644	7.01568	1.51136
chr1	121400393	121402166	unique_peak2	80	102	-0.530382	6.42131	1.5138
chr1	121415265	121415665	unique_peak1	35	12	1.33978	4.37033	2.51395
chr1	121422151	121424062	merged_common_peak	112	127	-0.385733	6.80713	1.11494
chr1	121437426	121437963	unique_peak1	35	31	0.0402196	5.02011	0.314604
chr1	121454156	121455282	merged_common_peak	119	73	0.487521	6.45321	1.48611
chr1	121462034	121463053	merged_common_peak	139	67	0.821634	6.49828	3.60802
chr1	121486534	121487161	merged_common_peak	59	36	0.5337	5.4763	1.08806
chr1	121544557	121545888	merged_common_peak	70	79	-0.347133	6.14836	0.693339
chr1	121563110	121564249	merged_common_peak	195	167	-0.0202104	7.38221	0.301682
chr1	121733197	121734799	merged_common_peak	93	101	-0.311484	6.51668	0.730164
chr1	121804123	121804434	unique_peak1	19	14	0.324492	4.06914	0.466171
chr1	121933740	121934280	unique_peak1	39	23	0.600241	4.88508	0.928161
chr1	121968540	121970925	merged_common_peak	109	142	-0.582631	6.86856	2.33847
chr1	121990051	121990483	unique_peak2	24	28	-0.319537	4.69821	0.407646
chr1	121996856	121997442	unique_peak1	78	33	1.03425	5.60459	3.25271
chr1	122161233	122162762	unique_peak2	66	96	-0.704913	6.24746	2.12139
chr1	122551455	122552066	unique_peak1	50	29	0.612624	5.2132	1.14509
chr1	122745932	122746354	unique_peak1	31	22	0.35458	4.70085	0.510322
chr1	123225672	123226455	unique_peak1	102	65	0.442367	6.26558	1.18046
chr1	123232341	123232894	unique_peak1	88	43	0.826296	5.87258	2.53115
chr1	123246897	123247949	merged_common_peak	125	82	0.389073	6.56958	1.13261
chr1	123327504	123328758	unique_peak2	40	66	-0.846907	5.64264	2.09825
chr1	123463953	123465062	merged_common_peak	49	56	-0.340625	5.66258	0.561693
chr1	124253204	124254358	merged_common_peak	68	118	-0.959342	6.41515	4.3119
chr1	127315286	127315725	unique_peak1	41	28	0.394361	5.05516	0.631312
chr1	127330829	127333258	merged_common_peak	118	160	-0.645458	7.00819	3.00499
chr1	127415410	127416800	merged_common_peak	91	98	-0.29801	6.48035	0.652149
chr1	127456500	127458283	merged_common_peak	119	116	-0.173391	6.78367	0.443233
chr1	127590096	127590544	unique_peak1	61	30	0.834078	5.37124	1.92156
chr1	127590885	127591328	unique_peak1	46	27	0.599765	5.10724	1.0148
chr1	127745474	127745780	unique_peak1	18	10	0.701367	3.81012	0.80435
chr1	127864406	127864712	unique_peak1	13	8	0.570646	3.45525	0.562038
chr1	128328256	128328633	unique_peak1	41	20	0.860025	4.82233	1.53432
chr1	128501130	128501562	unique_peak1	36	30	0.123726	5.01606	0.355352
chr1	128518690	128519082	unique_peak1	22	13	0.61635	4.11553	0.713635
chr1	128569715	128570333	unique_peak1	66	14	1.98811	4.90095	6.98897
chr1	128634584	128634936	unique_peak1	28	15	0.742681	4.37134	1.05601
chr1	128725558	128725980	unique_peak1	33	18	0.713638	4.60475	1.05901
chr1	128942231	128942898	unique_peak1	76	15	2.08643	5.04321	8.25501
chr1	129028537	129028874	unique_peak1	18	3	2.1608	3.0804	2.88232
chr1	129101158	129103408	merged_common_peak	111	126	-0.38665	6.79536	1.12228
chr1	129165808	129166231	unique_peak1	29	15	0.789332	4.39467	1.16797
chr1	129251670	129252120	unique_peak1	74	22	1.52665	5.28689	5.30039
chr1	129504823	129505279	unique_peak1	39	22	0.661641	4.85438	1.04214
chr1	129629056	129629510	unique_peak1	58	30	0.765829	5.33711	1.7033
chr1	129647263	129647677	unique_peak1	22	15	0.423705	4.21185	0.519194
chr1	129652425	129652786	unique_peak1	30	8	1.66453	4.00219	3.04994
chr1	129670082	129671552	unique_peak2	84	108	-0.545736	6.49532	1.60033
chr1	129672847	129673291	unique_peak1	45	29	0.470635	5.14221	0.820829
chr1	129764794	129766107	merged_common_peak	62	65	-0.234102	5.92734	0.446527
chr1	129886747	129887269	unique_peak1	37	28	0.256639	4.9863	0.470272
chr1	129961663	129963604	unique_peak2	100	98	-0.169578	6.54457	0.417832
chr1	129970441	129970903	unique_peak1	46	19	1.08519	4.86452	2.23153
chr1	129977834	129978262	unique_peak1	36	20	0.685605	4.73512	1.09827
chr1	129999062	130000906	unique_peak2	63	105	-0.895958	6.27994	3.4362
chr1	130055230	130055496	unique_peak1	9	4	0.955633	2.79974	1.51502
chr1	130140058	130141345	merged_common_peak	77	86	-0.338758	6.27356	0.70672
chr1	130312898	130314311	merged_common_peak	87	95	-0.314784	6.42757	0.710825
chr1	130483418	130483678	unique_peak1	8	3	1.13258	2.56629	1.57097
chr1	130722916	130723469	unique_peak1	73	33	0.944281	5.5596	2.61214
chr1	132206099	132206875	merged_common_peak	87	46	0.715589	5.91238	2.01604
chr1	132530375	132530857	unique_peak1	37	28	0.256639	4.9863	0.470272
chr1	132558072	132558403	unique_peak1	28	12	1.04224	4.22156	1.58668
chr1	132574710	132575986	merged_common_peak	303	166	0.592379	7.67989	4.17076
chr1	132611480	132614737	merged_common_peak	164	226	-0.691359	7.48087	4.61499
chr1	132629977	132630749	unique_peak1	69	39	0.633347	5.6386	1.44841
chr1	132658056	132658589	unique_peak1	56	32	0.628176	5.35848	1.25392
chr1	132660224	132661161	unique_peak1	105	51	0.825829	6.11335	2.88983
chr1	132695109	132695519	unique_peak1	40	23	0.63422	4.90207	1.01696
chr1	132718566	132719299	unique_peak1	137	62	0.912017	6.43329	4.26601
chr1	132725202	132725698	unique_peak1	67	46	0.360798	5.73499	0.703723
chr1	132737529	132738146	unique_peak1	110	38	1.30429	5.93755	5.93682
chr1	132980197	132980703	unique_peak1	87	54	0.488819	6.02577	1.18247
chr1	132990438	132991196	unique_peak1	140	114	0.0734008	6.88219	0.346314
chr1	133022480	133023175	unique_peak1	84	46	0.66786	5.88852	1.82508
chr1	133034257	133035910	unique_peak2	77	101	-0.56824	6.38831	1.61686
chr1	133049269	133050349	merged_common_peak	55	57	-0.209767	5.7531	0.400542
chr1	133095568	133096012	unique_peak1	53	36	0.388716	5.40381	0.674559
chr1	133102916	133103252	unique_peak1	27	17	0.524468	4.43216	0.713115
chr1	133134234	133135486	merged_common_peak	144	93	0.402796	6.75599	1.26598
chr1	133317291	133317512	unique_peak1	4	6	-0.483615	2.56555	0.947718
chr1	133382659	133383119	unique_peak1	49	25	0.791825	5.09635	1.55933
chr1	133385862	133386281	unique_peak1	44	25	0.646842	5.02386	1.15175
chr1	133422618	133426074	unique_peak2	161	245	-0.832575	7.52623	6.87939
chr1	133443282	133443907	unique_peak1	42	21	0.82529	4.87208	1.49188
chr1	133445531	133445875	unique_peak1	22	21	-0.0357267	4.44157	0.30103
chr1	133469967	133470819	merged_common_peak	39	57	-0.672778	5.52159	1.33966
chr1	133508702	133511909	merged_common_peak	212	191	-0.0983972	7.53576	0.385556
chr1	133520796	133521263	unique_peak1	54	43	0.163987	5.54143	0.386061
chr1	133535224	133535645	unique_peak1	36	24	0.434066	4.86089	0.677299
chr1	133554431	133555065	unique_peak1	48	37	0.216537	5.3562	0.432555
chr1	133709160	133709606	unique_peak1	42	21	0.82529	4.87208	1.49188
chr1	133723765	133725239	unique_peak2	68	90	-0.572319	6.22164	1.51799
chr1	133763289	133765092	unique_peak2	59	102	-0.943348	6.21483	3.56075
chr1	133806539	133808596	unique_peak2	89	119	-0.605788	6.604	2.06789
chr1	133818640	133819077	unique_peak1	78	12	2.42128	4.91108	10.1598
chr1	133834289	133834635	unique_peak1	22	31	-0.576295	4.71185	0.721234
chr1	133835395	133835849	unique_peak1	37	27	0.307265	4.96099	0.525808
chr1	133854037	133854407	unique_peak1	22	18	0.175777	4.33582	0.35119
chr1	133886114	133890806	merged_common_peak	476	366	0.0763526	8.55781	0.42822
chr1	133902896	133905452	merged_common_peak	174	233	-0.654206	7.54326	4.34497
chr1	134022399	134022990	unique_peak1	47	51	-0.264349	5.56827	0.449054
chr1	134034550	134035179	unique_peak1	51	32	0.501842	5.29531	0.923258
chr1	134052356	134052710	unique_peak1	29	35	-0.380593	4.97963	0.470272
chr1	134053639	134054954	merged_common_peak	102	85	0.0604966	6.45651	0.332055
chr1	134194511	134196646	merged_common_peak	135	118	-0.0256101	6.88201	0.301954
chr1	134224828	134225757	unique_peak1	104	60	0.582488	6.22198	1.69288
chr1	134252346	134252801	unique_peak1	43	33	0.228894	5.20191	0.447011
chr1	134313566	134314997	unique_peak2	63	90	-0.675832	6.16988	1.92348
chr1	134372814	134374198	merged_common_peak	197	140	0.246526	7.26281	0.817333
chr1	134483139	134484117	merged_common_peak	93	62	0.383661	6.16911	0.906171
chr1	134687220	134688356	merged_common_peak	136	153	-0.387498	7.07304	1.28535
chr1	134929978	134931100	unique_peak2	48	55	-0.34289	5.63591	0.566981
chr1	134999470	135000736	merged_common_peak	115	98	0.0209664	6.63984	0.305417
chr1	135077581	135078049	unique_peak1	30	36	-0.375	5.02195	0.465043
chr1	135121759	135122258	unique_peak1	47	25	0.735651	5.06827	1.34811
chr1	135142354	135142888	unique_peak1	63	47	0.247	5.70846	0.510148
chr1	135151830	135152397	unique_peak1	137	54	1.10794	6.33533	5.73659
chr1	135161620	135162114	unique_peak1	47	35	0.266166	5.30301	0.479516
chr1	135175266	135175637	unique_peak1	29	36	-0.420122	4.99939	0.518746
chr1	135182175	135184937	merged_common_peak	178	162	-0.101471	7.29799	0.370197
chr1	135224902	135226817	merged_common_peak	86	104	-0.459794	6.48435	1.25068
chr1	135243064	135246123	merged_common_peak	146	193	-0.623677	7.28807	3.37962
chr1	135250136	135250498	unique_peak1	30	38	-0.450949	5.05993	0.564347
chr1	135258311	135261118	unique_peak1	325	365	-0.443471	8.29396	3.46972
chr1	135268648	135269079	unique_peak1	44	47	-0.237681	5.46612	0.389932
chr1	135311532	135312130	unique_peak1	50	24	0.875659	5.08169	1.8282
chr1	135319300	135321040	unique_peak2	61	90	-0.719521	6.14803	2.15379
chr1	135327812	135328140	unique_peak1	16	3	2.00774	3.00387	3.03428
chr1	135404792	135405159	unique_peak1	25	2	3.00745	3.08869	5.06563
chr1	135491072	135492355	merged_common_peak	92	69	0.216941	6.23775	0.509714
chr1	135506108	135507559	merged_common_peak	86	90	-0.253343	6.38112	0.557726
chr1	135514936	135515293	unique_peak1	37	12	1.41418	4.40753	2.8534
chr1	135560679	135561708	merged_common_peak	109	81	0.219688	6.4674	0.543109
chr1	135578170	135578655	unique_peak1	58	36	0.510572	5.46474	1.0105
chr1	135805205	135805620	unique_peak1	37	31	0.11462	5.05731	0.353704
chr1	135829442	135832405	merged_common_peak	316	315	-0.270076	8.16874	1.35966
chr1	135857825	135859042	unique_peak2	51	68	-0.562289	5.82738	1.13843
chr1	135975396	135976193	unique_peak1	83	110	-0.588253	6.50029	1.84041
chr1	135988557	135991350	merged_common_peak	147	219	-0.795795	7.38346	5.67741
chr1	135993889	135997021	merged_common_peak	161	208	-0.597419	7.40865	3.39757
chr1	136092802	136094396	unique_peak2	54	77	-0.661983	5.95441	1.66351
chr1	136117304	136119619	merged_common_peak	196	145	0.189285	7.28447	0.609181
chr1	136138925	136139270	unique_peak1	29	19	0.467404	4.55563	0.677584
chr1	136236813	136237132	unique_peak1	17	31	-0.913602	4.5432	1.20073
chr1	136257477	136259281	merged_common_peak	187	157	0.0109816	7.30927	0.303779
chr1	136302208	136303237	unique_peak2	32	51	-0.779954	5.31046	1.49689
chr1	136311087	136312948	unique_peak2	93	128	-0.650286	6.68608	2.50689
chr1	136351322	136352622	merged_common_peak	70	73	-0.234659	6.09212	0.460841
chr1	136390658	136392106	unique_peak2	70	97	-0.639915	6.29475	1.88194
chr1	136415278	136415744	unique_peak1	31	29	-0.028749	4.89252	0.30103
chr1	136453460	136453911	unique_peak1	47	39	0.114163	5.37901	0.343417
chr1	136456576	136456979	unique_peak1	34	38	-0.283948	5.14343	0.412843
chr1	136610051	136610454	unique_peak1	24	12	0.838004	4.11944	1.06461
chr1	136632454	136633222	unique_peak2	13	36	-1.46888	4.47501	2.74005
chr1	136771914	136772211	unique_peak1	16	13	0.200389	3.90755	0.368541
chr1	136851708	136852816	merged_common_peak	57	66	-0.369587	5.8813	0.662566
chr1	137042980	137044442	unique_peak2	52	88	-0.903286	6.02409	2.89387
chr1	137065768	137066877	merged_common_peak	192	92	0.811723	6.94502	4.65099
chr1	137092530	137092937	unique_peak1	25	29	-0.314476	4.74965	0.40361
chr1	137154577	137156220	merged_common_peak	67	82	-0.459653	6.14521	1.04416
chr1	137179462	137180857	unique_peak2	73	85	-0.394521	6.229	0.881817
chr1	137209626	137210730	merged_common_peak	74	71	-0.11971	6.11007	0.340664
chr1	137264821	137265100	unique_peak1	15	18	-0.323607	4.08612	0.360334
chr1	137326292	137327847	unique_peak2	63	85	-0.594302	6.12911	1.50782
chr1	137566741	137567736	unique_peak2	36	53	-0.676965	5.41641	1.20937
chr1	137649180	137649969	unique_peak2	28	49	-0.901175	5.19327	1.70391
chr1	137972656	137973074	unique_peak1	30	16	0.74699	4.46096	1.12828
chr1	138124872	138125358	unique_peak1	28	29	-0.16421	4.82479	0.316544
chr1	138130379	138131700	merged_common_peak	59	64	-0.279215	5.88276	0.485274
chr1	138156265	138157433	unique_peak2	47	65	-0.608303	5.74024	1.28102
chr1	138241705	138243742	unique_peak2	80	111	-0.651236	6.48174	2.22569
chr1	138261027	138262080	unique_peak2	33	66	-1.10452	5.51383	3.10619
chr1	138311059	138312470	merged_common_peak	59	88	-0.73258	6.10944	2.08608
chr1	138339365	138339865	unique_peak1	63	31	0.831963	5.41598	1.99427
chr1	138402791	138403220	unique_peak1	56	23	1.08761	5.12877	2.65992
chr1	138421550	138421959	unique_peak1	30	29	-0.0724376	4.87067	0.30103
chr1	138437984	138438902	unique_peak1	99	79	0.124158	6.38401	0.384782
chr1	138466282	138466576	unique_peak1	12	9	0.316665	3.48026	0.394412
chr1	138520763	138521792	unique_peak2	59	60	-0.187584	5.83695	0.369635
chr1	138529507	138529892	unique_peak1	44	17	1.17736	4.7586	2.52372
chr1	138558420	138558825	unique_peak1	27	25	-0.00604711	4.69742	0.305288
chr1	138561739	138562209	unique_peak1	51	22	1.02267	5.0349	2.31341
chr1	138566446	138566957	unique_peak1	45	25	0.677086	5.03898	1.248
chr1	138589918	138590400	unique_peak1	42	27	0.477367	5.04604	0.777451
chr1	138595106	138595647	unique_peak1	60	32	0.721504	5.40515	1.53681
chr1	138738481	138739392	unique_peak1	110	21	2.13026	5.52456	11.6084
chr1	138745423	138745891	unique_peak1	41	21	0.792911	4.85589	1.37991
chr1	138771889	138772214	unique_peak1	33	21	0.502134	4.7105	0.721234
chr1	138791682	138793200	merged_common_peak	155	82	0.682967	6.71652	2.95321
chr1	138806671	138807243	unique_peak1	64	49	0.209441	5.74858	0.465607
chr1	138808183	138808642	unique_peak1	61	19	1.46635	5.0551	4.27037
chr1	138822535	138822972	unique_peak1	42	30	0.330526	5.11946	0.55667
chr1	138826258	138826737	unique_peak1	50	39	0.197587	5.42072	0.426351
chr1	138854217	138854624	unique_peak1	33	33	-0.125897	5.02451	0.314604
chr1	138856015	138856459	unique_peak1	61	28	0.930293	5.32313	2.24341
chr1	138867575	138868073	unique_peak1	67	50	0.242961	5.79391	0.498709
chr1	138917132	138917532	unique_peak1	28	20	0.350363	4.5675	0.528262
chr1	138931157	138931761	unique_peak1	46	31	0.40712	5.20356	0.662334
chr1	139040664	139041030	unique_peak1	18	7	1.1608	3.5804	1.38887
chr1	139068748	139069059	unique_peak1	22	12	0.723265	4.06207	0.84084
chr1	139122063	139122446	unique_peak1	26	10	1.18492	4.05189	1.7432
chr1	140398112	140398520	unique_peak1	24	13	0.731089	4.1729	0.912224
chr1	140503174	140503723	unique_peak1	43	21	0.856926	4.88789	1.60774
chr1	140506022	140506368	unique_peak1	27	12	0.993953	4.19742	1.44788
chr1	140515285	140517091	merged_common_peak	143	151	-0.300066	7.09789	0.923442
chr1	140824994	140826220	merged_common_peak	115	108	-0.117861	6.70925	0.367861
chr1	140859622	140860979	unique_peak2	52	78	-0.731333	5.93811	1.86708
chr1	141318179	141319673	unique_peak2	61	81	-0.569278	6.07291	1.38705
chr1	141350985	141352212	unique_peak2	36	68	-1.0306	5.59322	2.80976
chr1	141397821	141398185	unique_peak1	74	21	1.59078	5.25482	5.60897
chr1	141445120	141445559	unique_peak1	39	9	1.86328	4.25357	4.06789
chr1	141447830	141448314	unique_peak1	50	16	1.43205	4.80349	3.58938
chr1	141456488	141457327	merged_common_peak	112	50	0.941841	6.14335	3.74339
chr1	141557366	141557832	unique_peak1	71	25	1.2936	5.34724	4.14101
chr1	141677564	141678075	merged_common_peak	87	38	0.984776	5.77779	3.23079
chr1	141705204	141705575	unique_peak1	23	19	0.160342	4.4021	0.348739
chr1	141755068	141755588	unique_peak1	37	17	0.944695	4.64227	1.68243
chr1	141756772	141757136	unique_peak1	33	14	1.05467	4.43423	1.73082
chr1	141915119	141916000	merged_common_peak	81	42	0.746739	5.79963	2.03571
chr1	141977613	141978073	unique_peak1	52	20	1.18013	4.98238	2.88064
chr1	142079679	142080233	unique_peak1	74	35	0.88029	5.61007	2.40088
chr1	142277327	142278506	merged_common_peak	138	111	0.0918774	6.85329	0.361466
chr1	142303152	142303925	merged_common_peak	49	41	0.0999478	5.44229	0.341444
chr1	142312282	142312771	unique_peak1	47	25	0.735651	5.06827	1.34811
chr1	144549146	144549481	unique_peak1	55	37	0.400286	5.44807	0.724429
chr1	145405455	145405916	unique_peak1	33	10	1.50213	4.2105	2.75133
chr1	145510370	145510743	unique_peak1	33	17	0.79164	4.56575	1.20073
chr1	145528244	145528572	unique_peak1	21	9	1.04061	3.84223	1.37308
chr1	145549380	145550550	merged_common_peak	65	75	-0.373621	6.06112	0.71687
chr1	145586203	145587575	unique_peak2	46	64	-0.615248	5.71474	1.29978
chr1	145623599	145625191	unique_peak2	83	97	-0.408547	6.41044	0.97483
chr1	145793466	145794733	merged_common_peak	234	167	0.229507	7.50707	0.838542
chr1	146044877	146045141	unique_peak1	13	8	0.570646	3.45525	0.562038
chr1	147819504	147819831	unique_peak1	22	3	2.4237	3.21185	3.59865
chr1	147842005	147842424	unique_peak1	38	8	1.98044	4.16014	4.48604
chr1	149213387	149213763	unique_peak1	23	6	1.67492	3.64481	2.41165
chr1	152239288	152241144	merged_common_peak	95	135	-0.697551	6.73869	2.90386
chr1	152251459	152252068	unique_peak1	50	19	1.19759	4.92072	2.81179
chr1	152312985	152313929	merged_common_peak	89	75	0.053175	6.27452	0.323593
chr1	152516363	152516726	unique_peak1	27	20	0.302075	4.54336	0.471456
chr1	152872389	152872784	unique_peak1	32	19	0.598558	4.62121	0.841848
chr1	152925718	152926791	merged_common_peak	97	65	0.373892	6.23134	0.937275
chr1	152974844	152975906	merged_common_peak	373	155	0.975842	7.77332	11.3652
chr1	152998258	152998626	unique_peak1	33	15	0.961565	4.48078	1.53513
chr1	153000468	153000911	unique_peak1	101	45	0.949774	5.99845	3.49728
chr1	153024822	153025313	unique_peak1	55	34	0.518931	5.38875	0.966873
chr1	153059948	153060374	unique_peak1	28	11	1.15772	4.16382	1.81053
chr1	153065437	153066071	unique_peak1	90	36	1.10685	5.76288	4.01747
chr1	153111546	153112262	unique_peak1	93	45	0.837379	5.94225	2.67607
chr1	153143684	153144162	unique_peak1	40	9	1.89725	4.27056	4.2732
chr1	153172546	153172895	unique_peak1	37	23	0.529658	4.84979	0.844068
chr1	153189950	153190441	unique_peak1	42	35	0.114797	5.22732	0.348004
chr1	153190873	153192863	unique_peak2	118	138	-0.433482	6.9022	1.4087
chr1	153274865	153276577	unique_peak2	72	108	-0.755163	6.3906	2.64638
chr1	153330900	153331259	unique_peak1	29	14	0.882441	4.34811	1.33404
chr1	153336992	153337310	unique_peak1	7	11	-0.614463	3.27773	1.14218
chr1	153347370	153348700	unique_peak2	54	86	-0.819525	6.03318	2.5315
chr1	153556096	153556579	unique_peak1	61	24	1.14442	5.21607	3.01488
chr1	153601853	153603382	unique_peak2	59	105	-0.984768	6.23554	3.9168
chr1	154233033	154233987	merged_common_peak	53	60	-0.332568	5.76445	0.591158
chr1	154245019	154246419	merged_common_peak	276	123	0.893898	7.40115	7.45588
chr1	154257847	154258222	unique_peak1	26	16	0.556885	4.36591	0.733542
chr1	154291727	154292195	unique_peak1	34	14	1.09456	4.45417	1.87214
chr1	154344768	154345205	unique_peak1	54	24	0.979563	5.13364	2.19833
chr1	154612805	154614697	unique_peak2	91	124	-0.634437	6.64857	2.27421
chr1	154643191	154643507	unique_peak1	25	20	0.200097	4.49237	0.380102
chr1	154751631	154751975	unique_peak1	28	28	-0.1153	4.80033	0.304978
chr1	154912216	154912585	unique_peak1	32	26	0.165598	4.83769	0.363125
chr1	155178815	155181149	unique_peak2	101	138	-0.645605	6.79614	2.61599
chr1	155333641	155335450	unique_peak2	77	113	-0.728705	6.46854	2.63395
chr1	155508459	155508826	unique_peak1	46	27	0.599765	5.10724	1.0148
chr1	155516636	155517677	merged_common_peak	64	59	-0.053593	5.88009	0.302886
chr1	155525713	155527690	merged_common_peak	241	141	0.512468	7.40598	2.74083
chr1	155538184	155538712	unique_peak1	49	44	0.00041208	5.49206	0.30347
chr1	155539693	155540077	unique_peak1	39	31	0.185203	5.0926	0.38213
chr1	155548549	155549083	unique_peak1	106	77	0.253787	6.4123	0.628513
chr1	155549473	155550060	unique_peak1	95	61	0.435716	6.17205	1.0966
chr1	155746388	155751657	unique_peak2	230	398	-1.04204	8.11922	15.8833
chr1	155832781	155833209	unique_peak1	51	26	0.791348	5.15056	1.63156
chr1	155835493	155835987	unique_peak1	64	33	0.765835	5.47038	1.81178
chr1	155839572	155840003	unique_peak1	41	35	0.0824172	5.21113	0.327809
chr1	155880766	155882216	merged_common_peak	203	204	-0.252323	7.55332	0.893126
chr1	155964502	155966152	merged_common_peak	91	105	-0.396573	6.52963	0.975364
chr1	155995696	155998151	merged_common_peak	246	191	0.105394	7.63766	0.44074
chr1	156895703	156896835	unique_peak2	44	66	-0.718808	5.70669	1.58121
chr1	156921695	156922686	merged_common_peak	116	83	0.269817	6.52723	0.68401
chr1	156929902	156931735	merged_common_peak	97	105	-0.309635	6.5731	0.712129
chr1	156945085	156947556	merged_common_peak	98	139	-0.697027	6.78077	3.03764
chr1	157005366	157006634	unique_peak2	52	71	-0.597478	5.87119	1.27243
chr1	157019849	157021058	unique_peak2	35	76	-1.22657	5.6535	4.0866
chr1	157046737	157047135	unique_peak1	37	25	0.41418	4.90753	0.664636
chr1	157065111	157065897	unique_peak2	27	47	-0.89057	5.13968	1.63156
chr1	157122659	157124269	merged_common_peak	130	97	0.202953	6.71619	0.566
chr1	157404775	157406242	unique_peak2	65	78	-0.429474	6.08904	0.875069
chr1	157423552	157423925	unique_peak1	28	22	0.219119	4.63312	0.412012
chr1	157656667	157657341	unique_peak1	166	72	0.961944	6.6708	5.36579
chr1	157672746	157675554	merged_common_peak	210	171	0.0473187	7.44992	0.33152
chr1	157690664	157691026	unique_peak1	22	15	0.423705	4.21185	0.519194
chr1	157702464	157702920	unique_peak1	42	30	0.330526	5.11946	0.55667
chr1	157733979	157734386	unique_peak1	20	11	0.713559	3.94174	0.876667
chr1	157819498	157821754	merged_common_peak	105	136	-0.571764	6.81215	2.1565
chr1	157882416	157884747	merged_common_peak	175	193	-0.375913	7.41196	1.53367
chr1	157889565	157889991	unique_peak1	38	35	-0.0195608	5.16014	0.304089
chr1	158113209	158114769	merged_common_peak	104	86	0.0702816	6.47808	0.331705
chr1	158388805	158389217	unique_peak1	30	12	1.13401	4.26745	1.87884
chr1	158435604	158436659	merged_common_peak	85	60	0.307806	6.08464	0.710726
chr1	158586174	158590858	merged_common_peak	264	265	-0.268131	7.92122	1.16723
chr1	158606317	158606694	unique_peak1	23	18	0.234343	4.3651	0.388034
chr1	158648153	158649754	unique_peak2	79	89	-0.352829	6.31544	0.79523
chr1	158671559	158672694	unique_peak2	37	60	-0.816117	5.52268	1.74659
chr1	158749311	158749747	unique_peak1	57	25	0.996062	5.19847	2.40123
chr1	158772611	158772963	unique_peak1	25	24	-0.0514416	4.61814	0.30103
chr1	158791430	158792560	merged_common_peak	52	69	-0.556836	5.85087	1.12396
chr1	158868534	158870620	unique_peak2	94	114	-0.469987	6.6105	1.36473
chr1	158908801	158909219	unique_peak1	91	28	1.47337	5.59466	6.14152
chr1	158941266	158941744	unique_peak1	45	24	0.73367	5.01069	1.38065
chr1	158942807	158944516	merged_common_peak	162	104	0.404163	6.91633	1.39952
chr1	159003758	159004237	unique_peak1	41	37	0.00441468	5.25013	0.303925
chr1	159006112	159008034	unique_peak2	118	115	-0.172522	6.77172	0.444539
chr1	159341689	159343291	merged_common_peak	69	86	-0.487668	6.19911	1.14989
chr1	159388081	159389291	unique_peak2	44	68	-0.761243	5.7279	1.76856
chr1	159455227	159458282	merged_common_peak	290	228	0.0767391	7.87757	0.391598
chr1	159524735	159525027	unique_peak1	22	21	-0.0357267	4.44157	0.30103
chr1	160638527	160638804	unique_peak1	9	4	0.955633	2.79974	1.51502
chr1	160861831	160862405	unique_peak1	102	25	1.78632	5.5936	8.76955
chr1	160898552	160899292	merged_common_peak	107	41	1.15967	5.97215	4.94318
chr1	161054832	161055244	unique_peak1	32	10	1.46105	4.18996	2.57347
chr1	161161655	161162990	unique_peak2	58	86	-0.722918	6.08148	2.01863
chr1	161180410	161180766	unique_peak1	27	12	0.993953	4.19742	1.44788
chr1	161973865	161975225	merged_common_peak	77	92	-0.434973	6.32167	1.01696
chr1	161976982	161977376	unique_peak1	30	28	-0.023528	4.84622	0.30484
chr1	162124682	162126092	merged_common_peak	72	78	-0.290759	6.1584	0.558013
chr1	162142160	162143991	merged_common_peak	113	114	-0.219099	6.73594	0.530601
chr1	162303322	162303829	unique_peak1	51	32	0.501842	5.29531	0.923258
chr1	162304580	162305201	unique_peak1	64	33	0.765835	5.47038	1.81178
chr1	162374743	162375099	unique_peak1	24	11	0.953482	4.0617	1.24083
chr1	162622574	162623727	merged_common_peak	150	99	0.369323	6.82852	1.16068
chr1	162715718	162716187	unique_peak1	100	30	1.50558	5.70699	6.76861
chr1	162721682	162723660	merged_common_peak	98	134	-0.644559	6.75454	2.59355
chr1	162835547	162837680	unique_peak2	100	138	-0.659162	6.78936	2.72309
chr1	162910627	162911332	unique_peak1	80	38	0.870717	5.72076	2.50493
chr1	162911427	162911893	unique_peak1	67	37	0.667459	5.58166	1.49662
chr1	162917003	162917847	unique_peak1	146	81	0.618683	6.66689	2.44235
chr1	162963537	162967167	merged_common_peak	190	229	-0.508942	7.59102	2.8064
chr1	163000015	163001381	unique_peak2	48	76	-0.802322	5.86563	2.17663
chr1	163060920	163061865	merged_common_peak	55	56	-0.184676	5.74055	0.374818
chr1	163125253	163126888	merged_common_peak	121	125	-0.25756	6.8485	0.679155
chr1	163174928	163175444	unique_peak1	84	30	1.26825	5.58832	4.62754
chr1	163179373	163182152	merged_common_peak	240	231	-0.201464	7.75725	0.723103
chr1	163187933	163188533	unique_peak1	69	38	0.669873	5.62034	1.56409
chr1	163199055	163199573	unique_peak1	50	33	0.432052	5.30349	0.76768
chr1	163260769	163261135	unique_peak1	24	9	1.21652	3.93019	1.67711
chr1	163308501	163309436	merged_common_peak	96	84	-0.00521874	6.40678	0.302315
chr1	163680767	163681129	unique_peak1	23	20	0.0899526	4.43729	0.321719
chr1	163805836	163807441	merged_common_peak	79	93	-0.415564	6.34681	1.00812
chr1	163881497	163881814	unique_peak1	21	16	0.275073	4.225	0.448201
chr1	163898727	163899748	unique_peak2	45	57	-0.480455	5.61775	0.796452
chr1	163906137	163907283	merged_common_peak	77	71	-0.0657397	6.13706	0.307234
chr1	163934914	163935953	merged_common_peak	44	55	-0.460074	5.57732	0.745957
chr1	163967174	163968664	merged_common_peak	115	87	0.190891	6.55488	0.497434
chr1	164407409	164408626	unique_peak2	57	65	-0.347892	5.87045	0.615336
chr1	164500209	164502119	unique_peak2	95	108	-0.378272	6.57905	0.954179
chr1	164573688	164574573	merged_common_peak	59	47	0.15819	5.66406	0.406463
chr1	164669707	164671224	unique_peak2	47	93	-1.1185	5.99534	4.38788
chr1	164770029	164771001	merged_common_peak	51	52	-0.181685	5.63708	0.355888
chr1	164783890	164784502	unique_peak1	52	24	0.928591	5.10815	2.0719
chr1	164796568	164797026	unique_peak1	48	29	0.557574	5.18568	0.975111
chr1	164805188	164805560	unique_peak1	31	20	0.485824	4.63523	0.662034
chr1	164827961	164829056	merged_common_peak	76	72	-0.103395	6.13813	0.32585
chr1	164846481	164847492	unique_peak2	20	54	-1.48284	5.03994	3.82397
chr1	164893626	164894374	unique_peak1	79	37	0.891097	5.69348	2.5475
chr1	164896313	164896826	unique_peak1	72	47	0.428059	5.79899	0.931938
chr1	164917621	164918181	unique_peak1	76	19	1.7645	5.20418	6.65939
chr1	165268986	165269593	unique_peak1	44	28	0.4893	5.10263	0.836075
chr1	165333314	165334503	unique_peak2	42	62	-0.692558	5.631	1.44841
chr1	165709080	165710131	unique_peak2	34	51	-0.698985	5.35095	1.25392
chr1	165924155	165925589	unique_peak2	38	72	-1.03946	5.67009	2.95733
chr1	166085010	166085548	unique_peak1	104	50	0.8408	6.09283	2.92763
chr1	166092604	166094329	merged_common_peak	113	101	-0.0460346	6.64941	0.305373
chr1	166138610	166138984	unique_peak1	26	18	0.396421	4.44614	0.549582
chr1	166165230	166165676	unique_peak1	42	29	0.377831	5.09581	0.621525
chr1	166178329	166180583	unique_peak2	159	154	-0.183279	7.18448	0.516808
chr1	166182496	166183117	unique_peak1	77	35	0.93426	5.63706	2.75965
chr1	166236874	166238391	unique_peak2	60	78	-0.537882	6.03484	1.25387
chr1	166254330	166254714	unique_peak1	56	26	0.917682	5.21373	2.09594
chr1	166266106	166266475	unique_peak1	24	22	0.0148821	4.531	0.305856
chr1	166345361	166345931	unique_peak1	55	44	0.156361	5.57003	0.384249
chr1	166356271	166356952	unique_peak1	50	25	0.819075	5.10998	1.67018
chr1	166386890	166390191	merged_common_peak	224	232	-0.302201	7.71309	1.25639
chr1	166411746	166412047	unique_peak1	12	18	-0.609334	3.94326	0.563372
chr1	166423105	166423545	unique_peak1	51	26	0.791348	5.15056	1.63156
chr1	166451130	166452471	merged_common_peak	193	122	0.415479	7.15025	1.64521
chr1	166561872	166562210	unique_peak1	18	18	-0.0871286	4.20436	0.30103
chr1	166633568	166635656	merged_common_peak	162	118	0.22359	7.00661	0.67406
chr1	166643669	166644792	merged_common_peak	199	97	0.785198	7.00731	4.5862
chr1	167130480	167130896	unique_peak1	34	8	1.83153	4.08569	3.64935
chr1	167165964	167168298	unique_peak2	97	144	-0.761623	6.7991	3.51159
chr1	167257439	167259688	merged_common_peak	200	170	-0.0110819	7.41231	0.30103
chr1	167351245	167352184	merged_common_peak	173	89	0.71642	6.85006	3.52423
chr1	167389208	167392487	merged_common_peak	272	279	-0.301204	7.97868	1.46349
chr1	167399862	167400248	unique_peak1	28	22	0.219119	4.63312	0.412012
chr1	167413867	167416502	merged_common_peak	159	149	-0.135973	7.16083	0.410395
chr1	167432897	167434531	merged_common_peak	169	116	0.305905	7.02332	1.00217
chr1	167539019	167539628	unique_peak1	96	32	1.35978	5.72428	5.7092
chr1	167545699	167547917	merged_common_peak	158	128	0.0729909	7.04772	0.35368
chr1	167564129	167565399	merged_common_peak	53	73	-0.611284	5.90381	1.43078
chr1	167571233	167573752	merged_common_peak	117	163	-0.683706	7.0157	3.37762
chr1	167666278	167666564	unique_peak1	22	24	-0.220151	4.53378	0.344492
chr1	167688844	167691301	merged_common_peak	206	194	-0.160084	7.52729	0.513563
chr1	167747378	167747719	unique_peak1	19	9	0.909454	3.77666	1.09395
chr1	167932157	167934067	merged_common_peak	101	104	-0.240909	6.59379	0.554436
chr1	167962055	167962566	unique_peak1	42	20	0.892404	4.83852	1.65365
chr1	168208986	168209272	unique_peak1	18	11	0.575836	3.87288	0.671583
chr1	168209793	168210184	unique_peak1	32	19	0.598558	4.62121	0.841848
chr1	168223053	168223605	unique_peak1	47	18	1.18816	4.84201	2.59279
chr1	168290006	168291040	merged_common_peak	68	52	0.207555	5.8317	0.456849
chr1	168308407	168310533	merged_common_peak	121	122	-0.222795	6.83112	0.577745
chr1	168339231	168340524	unique_peak2	56	73	-0.536884	5.94101	1.15311
chr1	169214507	169215981	unique_peak2	41	69	-0.876941	5.69081	2.27954
chr1	169238021	169239493	merged_common_peak	95	101	-0.282513	6.53117	0.640728
chr1	169250000	169250797	unique_peak1	84	26	1.46756	5.48867	5.6875
chr1	169269874	169271712	unique_peak2	69	103	-0.745164	6.32786	2.53665
chr1	169279848	169281654	merged_common_peak	114	92	0.0992501	6.58878	0.373433
chr1	169308026	169308467	unique_peak1	38	30	0.196168	5.05228	0.419638
chr1	169316821	169318151	merged_common_peak	114	78	0.334628	6.47109	0.892988
chr1	169344976	169345302	unique_peak1	15	16	-0.163142	4.00589	0.308036
chr1	169567168	169567554	unique_peak1	31	26	0.123254	4.81651	0.336581
chr1	169711966	169712752	merged_common_peak	101	53	0.718449	6.11411	2.30468
chr1	170221339	170221744	unique_peak1	30	24	0.190597	4.73915	0.40361
chr1	170296398	170296782	unique_peak1	28	24	0.0988246	4.69327	0.339372
chr1	170367869	170368196	unique_peak1	16	15	0.00774434	4.00387	0.308036
chr1	170402692	170403089	unique_peak1	28	15	0.742681	4.37134	1.05601
chr1	170405690	170406055	unique_peak1	34	21	0.542023	4.73044	0.800403
chr1	170427892	170428346	unique_peak1	50	20	1.1272	4.95592	2.58657
chr1	171096183	171097167	merged_common_peak	122	49	1.0871	6.1874	4.9613
chr1	171117871	171118257	unique_peak1	38	27	0.343009	4.97886	0.581177
chr1	171197139	171197480	unique_peak1	14	5	1.25055	3.21024	1.95509
chr1	171461150	171462241	merged_common_peak	78	66	0.055626	6.0939	0.32658
chr1	171851864	171852379	unique_peak1	34	29	0.0945638	4.95417	0.333081
chr1	171961763	171962220	unique_peak1	44	16	1.25982	4.71737	2.76493
chr1	171965206	171965669	unique_peak1	66	23	1.31004	5.23998	4.01185
chr1	172066222	172067221	unique_peak2	27	52	-1.03353	5.21116	2.21947
chr1	172144826	172145881	unique_peak2	45	53	-0.377362	5.56621	0.578228
chr1	172150538	172150809	unique_peak1	16	10	0.548313	3.73359	0.604423
chr1	172222591	172222971	unique_peak1	30	25	0.134013	4.76745	0.365429
chr1	172254726	172256200	merged_common_peak	210	160	0.142667	7.40225	0.509281
chr1	172358201	172358735	unique_peak1	70	22	1.45123	5.24918	4.77972
chr1	172386399	172387167	unique_peak1	73	48	0.417034	5.82323	0.858503
chr1	172425560	172427910	merged_common_peak	173	143	0.0383476	7.1891	0.319686
chr1	172445853	172447551	merged_common_peak	218	122	0.582278	7.23365	3.04783
chr1	172465399	172465795	unique_peak1	33	15	0.961565	4.48078	1.53513
chr1	172518947	172520549	unique_peak2	89	95	-0.28386	6.44303	0.620963
chr1	172520688	172521090	unique_peak1	37	11	1.52966	4.34979	3.15925
chr1	172537252	172538014	unique_peak1	130	35	1.64774	5.99379	9.69498
chr1	172538572	172539017	unique_peak1	54	20	1.2311	5.00787	3.03172
chr1	172553107	172553555	unique_peak1	32	22	0.396924	4.72202	0.569353
chr1	172624689	172625141	unique_peak1	44	23	0.762319	4.96612	1.41531
chr1	172627129	172627579	unique_peak1	53	41	0.205852	5.49524	0.420707
chr1	172684894	172685246	unique_peak1	48	11	1.8795	4.52471	4.90497
chr1	172691634	172691953	unique_peak1	23	13	0.674915	4.14481	0.809261
chr1	172732871	172733203	unique_peak1	19	12	0.530943	3.96591	0.647241
chr1	172745483	172746069	unique_peak1	40	22	0.69562	4.87137	1.13829
chr1	172797318	172799466	merged_common_peak	177	121	0.308811	7.08514	1.021
chr1	172814664	172816078	merged_common_peak	80	91	-0.367443	6.33984	0.838566
chr1	172902982	172903428	unique_peak1	43	41	-0.0759603	5.35434	0.303711
chr1	172974301	172975695	unique_peak2	50	73	-0.689938	5.86448	1.64294
chr1	172987085	172988127	merged_common_peak	57	67	-0.390961	5.89198	0.712697
chr1	172993661	172997398	merged_common_peak	240	333	-0.727187	8.02011	7.33771
chr1	173031697	173034061	merged_common_peak	189	252	-0.653669	7.65616	4.69095
chr1	173053134	173053489	unique_peak1	38	25	0.449924	4.9254	0.73413
chr1	173079895	173081638	unique_peak2	70	100	-0.683417	6.3165	2.14079
chr1	173099105	173099566	unique_peak1	44	28	0.4893	5.10263	0.836075
chr1	173133694	173134046	unique_peak1	29	23	0.204369	4.68715	0.407646
chr1	173134372	173134856	unique_peak1	60	38	0.480496	5.52565	0.908349
chr1	173154948	173155526	unique_peak1	161	110	0.315524	6.95218	0.988961
chr1	173162528	173162978	unique_peak1	55	25	0.947774	5.17433	2.14569
chr1	173176589	173178117	merged_common_peak	81	111	-0.634352	6.49018	2.11976
chr1	173185955	173186625	unique_peak1	90	69	0.187025	6.2228	0.477532
chr1	173199786	173201215	unique_peak2	64	89	-0.638556	6.17258	1.73133
chr1	173211337	173212042	unique_peak1	49	49	-0.151591	5.56806	0.338002
chr1	173257959	173260470	unique_peak2	94	172	-1.05913	6.90507	7.19031
chr1	173274800	173275270	unique_peak1	58	23	1.13506	5.15249	2.94384
chr1	173340941	173342743	unique_peak2	102	109	-0.294598	6.63406	0.695551
chr1	173354867	173355520	unique_peak1	55	44	0.156361	5.57003	0.384249
chr1	173432471	173434674	merged_common_peak	174	174	-0.235053	7.33368	0.721627
chr1	173495958	173496339	unique_peak1	37	20	0.722303	4.75347	1.20071
chr1	174012194	174013613	unique_peak2	58	81	-0.637527	6.03879	1.58091
chr1	174077057	174079946	merged_common_peak	137	166	-0.494408	7.1365	1.99182
chr1	174147181	174147657	unique_peak1	32	32	-0.123909	4.98244	0.315042
chr1	174237814	174238311	unique_peak1	36	42	-0.348342	5.25209	0.48423
chr1	174239516	174243425	merged_common_peak	211	258	-0.536719	7.74845	3.41933
chr1	174254693	174257097	unique_peak2	78	110	-0.672701	6.45807	2.24744
chr1	174306061	174307436	merged_common_peak	73	90	-0.476051	6.26977	1.18046
chr1	174420554	174420884	unique_peak1	16	18	-0.240183	4.12784	0.326591
chr1	174561769	174563809	merged_common_peak	87	147	-0.939275	6.73982	5.13163
chr1	174580474	174583260	merged_common_peak	172	153	-0.0664452	7.23356	0.327089
chr1	174615359	174615667	unique_peak1	20	14	0.39163	4.10271	0.532159
chr1	174636444	174636842	unique_peak1	36	11	1.49296	4.33144	2.97842
chr1	174757786	174758065	unique_peak1	14	4	1.51358	3.07872	2.23385
chr1	174832618	174834465	merged_common_peak	118	107	-0.0694288	6.72017	0.317576
chr1	174862286	174862759	unique_peak1	64	33	0.765835	5.47038	1.81178
chr1	176498663	176499125	unique_peak1	79	16	2.05156	5.11324	8.24553
chr1	176500118	176500457	unique_peak1	36	16	0.99046	4.58269	1.74023
chr1	176672709	176673269	unique_peak1	63	23	1.247	5.20846	3.54084
chr1	176695665	176696293	unique_peak1	53	5	3.01321	4.09157	9.06343
chr1	176701799	176702698	merged_common_peak	80	40	0.798567	5.75684	2.20625
chr1	176837646	176838345	unique_peak1	107	41	1.15967	5.97215	4.94318
chr1	176851587	176852035	unique_peak1	28	28	-0.1153	4.80033	0.304978
chr1	176861150	176861784	unique_peak1	69	25	1.25484	5.32786	3.82925
chr1	176890011	176890544	unique_peak1	31	13	1.07079	4.34275	1.65863
chr1	176971276	176972043	merged_common_peak	39	45	-0.338359	5.35438	0.518626
chr1	177460008	177460380	unique_peak1	28	14	0.83579	4.32479	1.21174
chr1	177537580	177538744	merged_common_peak	395	132	1.28462	7.69759	18.4151
chr1	177552727	177556381	merged_common_peak	285	247	-0.0621028	7.92314	0.337298
chr1	177561763	177562440	unique_peak1	46	30	0.452924	5.18066	0.737358
chr1	177576319	177578218	merged_common_peak	168	130	0.134728	7.10079	0.456429
chr1	177621900	177623160	unique_peak2	59	70	-0.406594	5.94645	0.750586
chr1	177810400	177811482	unique_peak2	39	49	-0.458653	5.41453	0.734469
chr1	178743033	178745468	unique_peak2	101	161	-0.866514	6.90659	4.8682
chr1	178748029	178748615	unique_peak1	44	34	0.217998	5.23828	0.443106
chr1	178756283	178756867	unique_peak1	34	36	-0.207999	5.10545	0.352153
chr1	178792371	178792676	unique_peak1	24	13	0.731089	4.1729	0.912224
chr1	179118902	179119178	unique_peak1	10	4	1.08679	2.86532	1.68135
chr1	179388588	179389530	merged_common_peak	56	45	0.149008	5.59807	0.382513
chr1	179405520	179407298	merged_common_peak	161	117	0.227297	6.99629	0.676993
chr1	179641134	179641557	unique_peak1	32	14	1.0136	4.41369	1.59386
chr1	179642862	179643307	unique_peak1	59	21	1.28372	5.10129	3.56455
chr1	179725878	179727231	merged_common_peak	61	85	-0.637991	6.10727	1.70786
chr1	179912676	179914745	merged_common_peak	126	121	-0.155746	6.85286	0.414817
chr1	180117142	180118612	unique_peak2	95	88	-0.0858212	6.43282	0.321232
chr1	180120552	180120888	unique_peak1	20	12	0.598081	3.99948	0.739965
chr1	180148516	180150144	merged_common_peak	106	84	0.129799	6.47429	0.400445
chr1	180165668	180166509	unique_peak1	84	29	1.31556	5.56467	4.87582
chr1	180247852	180251862	merged_common_peak	295	355	-0.536347	8.20756	4.70503
chr1	180259992	180260633	unique_peak1	76	34	0.957146	5.60786	2.80976
chr1	180265790	180269037	merged_common_peak	182	257	-0.733558	7.64445	5.84196
chr1	180298502	180300207	merged_common_peak	268	208	0.100408	7.75756	0.429739
chr1	180335258	180337207	merged_common_peak	117	152	-0.583542	6.96562	2.45233
chr1	180393509	180394596	unique_peak2	28	51	-0.957759	5.22156	1.93089
chr1	180866664	180867050	unique_peak1	31	11	1.29318	4.23155	2.12469
chr1	180911815	180912142	unique_peak1	19	18	-0.0165453	4.23965	0.3069
chr1	181475630	181477264	unique_peak2	87	130	-0.763245	6.6518	3.2808
chr1	181489425	181489817	unique_peak1	27	30	-0.259804	4.82429	0.363125
chr1	181516858	181517241	unique_peak1	29	24	0.145476	4.71659	0.367911
chr1	181732688	181734343	unique_peak2	88	101	-0.386698	6.47908	0.944544
chr1	181763703	181764172	unique_peak1	50	25	0.819075	5.10998	1.67018
chr1	181766438	181766852	unique_peak1	54	25	0.922979	5.16193	2.02221
chr1	181948346	181948716	unique_peak1	26	18	0.396421	4.44614	0.549582
chr1	181951513	181951865	unique_peak1	30	24	0.190597	4.73915	0.40361
chr1	181971897	181972908	unique_peak1	152	23	2.44632	5.80812	18.4637
chr1	182106872	182107334	unique_peak1	46	34	0.277837	5.2682	0.48423
chr1	182124021	182127250	merged_common_peak	204	231	-0.424095	7.64593	2.11542
chr1	182139623	182141470	merged_common_peak	248	156	0.406833	7.49804	1.91966
chr1	182145166	182145688	unique_peak1	69	37	0.707348	5.6016	1.68686
chr1	182146652	182147454	unique_peak1	99	71	0.276161	6.30801	0.653467
chr1	182159983	182160558	unique_peak1	59	32	0.698759	5.39377	1.53681
chr1	182175850	182176678	unique_peak1	150	96	0.413266	6.80655	1.35582
chr1	182185495	182187272	merged_common_peak	118	122	-0.257056	6.81399	0.649846
chr1	182644911	182646020	merged_common_peak	169	85	0.750005	6.80127	3.7395
chr1	182649806	182651030	merged_common_peak	91	72	0.141523	6.26059	0.416057
chr1	182655169	182656929	unique_peak2	72	112	-0.807158	6.4166	3.04386
chr1	182687539	182688762	merged_common_peak	95	65	0.345518	6.21715	0.828574
chr1	182697555	182699426	merged_common_peak	99	113	-0.386804	6.63949	1.03707
chr1	182707390	182708844	unique_peak2	85	96	-0.36137	6.41923	0.807168
chr1	182743089	182745031	merged_common_peak	86	129	-0.767916	6.63841	3.31054
chr1	182780414	182781984	merged_common_peak	88	155	-0.999675	6.78556	5.93188
chr1	182825619	182826750	unique_peak2	26	51	-1.05609	5.17239	2.27206
chr1	182882217	182883346	merged_common_peak	223	139	0.426573	7.34257	1.90146
chr1	182910493	182912175	merged_common_peak	157	107	0.320649	6.91521	1.00609
chr1	182935373	182936049	unique_peak1	124	70	0.603401	6.45145	2.07624
chr1	182939721	182940387	unique_peak1	99	70	0.296339	6.29792	0.701532
chr1	182965512	182966001	unique_peak1	79	39	0.817096	5.73048	2.24219
chr1	182967444	182968528	merged_common_peak	122	75	0.483025	6.48944	1.45965
chr1	183073672	183074921	merged_common_peak	70	68	-0.13373	6.04166	0.34248
chr1	183140221	183143234	unique_peak2	148	192	-0.597626	7.29364	3.09935
chr1	183185673	183189448	merged_common_peak	254	244	-0.202419	7.83543	0.758008
chr1	183405905	183406622	unique_peak1	70	23	1.38983	5.27988	4.50094
chr1	183672860	183674051	unique_peak2	54	64	-0.398949	5.82289	0.734682
chr1	183771540	183773290	unique_peak2	85	120	-0.68032	6.5787	2.4643
chr1	183818619	183819713	merged_common_peak	53	65	-0.446225	5.82128	0.858503
chr1	184054211	184055882	merged_common_peak	93	102	-0.325559	6.52372	0.774023
chr1	184120183	184120621	unique_peak1	40	24	0.575326	4.93152	0.907273
chr1	184185755	184186879	merged_common_peak	93	75	0.113014	6.30443	0.368825
chr1	184212612	184213106	unique_peak1	46	46	-0.147469	5.48085	0.340525
chr1	184217872	184218177	unique_peak1	19	23	-0.35358	4.40817	0.383878
chr1	184270886	184272349	unique_peak2	45	92	-1.16163	5.95834	4.45196
chr1	184391224	184391748	unique_peak1	46	24	0.763264	5.02549	1.38065
chr1	184419537	184420829	merged_common_peak	60	84	-0.643492	6.08764	1.72858
chr1	184429431	184430236	unique_peak1	60	43	0.306467	5.61267	0.572488
chr1	184446784	184448282	unique_peak2	59	82	-0.631886	6.0591	1.56182
chr1	184492966	184493675	unique_peak1	61	29	0.881384	5.34758	2.07758
chr1	184504841	184505097	unique_peak1	24	14	0.631553	4.22267	0.781209
chr1	184732570	184733376	unique_peak1	70	24	1.33094	5.30933	4.23599
chr1	184744769	184745123	unique_peak1	22	20	0.0313875	4.40801	0.306327
chr1	184833200	184833505	unique_peak1	16	13	0.200389	3.90755	0.368541
chr1	184846278	184846638	unique_peak1	20	10	0.839089	3.87898	1.03889
chr1	184887081	184887847	unique_peak1	72	57	0.15504	5.9355	0.415025
chr1	184920667	184921702	unique_peak2	35	49	-0.603637	5.34204	0.983322
chr1	185856921	185859308	merged_common_peak	174	187	-0.33843	7.38537	1.23625
chr1	185884284	185884805	unique_peak1	78	48	0.507005	5.86821	1.19693
chr1	185903898	185904213	unique_peak1	31	10	1.41871	4.16879	2.39922
chr1	185923884	185924989	merged_common_peak	166	86	0.708826	6.79736	3.31854
chr1	186429544	186429979	unique_peak1	38	13	1.34301	4.47886	2.74005
chr1	186432257	186432559	unique_peak1	27	21	0.234961	4.57691	0.416753
chr1	186499129	186500297	merged_common_peak	132	99	0.194657	6.74118	0.530601
chr1	186553298	186553742	unique_peak1	37	14	1.20773	4.51076	2.32007
chr1	186634589	186635980	unique_peak1	175	142	0.064128	7.19194	0.337598
chr1	186648235	186648927	unique_peak1	77	58	0.221542	5.99341	0.508178
chr1	186668895	186670849	merged_common_peak	136	175	-0.580143	7.16936	2.72434
chr1	186674597	186678063	merged_common_peak	334	263	0.0653099	8.07705	0.369122
chr1	186691386	186692283	unique_peak1	147	84	0.576174	6.69748	2.21729
chr1	186705370	186707409	merged_common_peak	115	118	-0.244495	6.77257	0.62413
chr1	187017374	187017784	unique_peak1	24	18	0.290517	4.39319	0.433767
chr1	187027143	187028831	unique_peak2	72	94	-0.556834	6.29144	1.45604
chr1	187087636	187088037	unique_peak1	18	14	0.253908	4.03384	0.409888
chr1	187152390	187153831	unique_peak2	55	88	-0.82752	6.06197	2.60283
chr1	187186146	187187875	merged_common_peak	112	158	-0.698616	6.96357	3.38325
chr1	187280262	187280851	unique_peak1	49	48	-0.122445	5.55349	0.322048
chr1	187858361	187858750	unique_peak1	32	14	1.0136	4.41369	1.59386
chr1	187940442	187941448	merged_common_peak	49	50	-0.18016	5.58235	0.3582
chr1	188197814	188198304	unique_peak1	102	18	2.23883	5.36734	11.6792
chr1	188232810	188233216	unique_peak1	36	7	2.07792	4.03896	4.50509
chr1	188478938	188479234	unique_peak1	11	7	0.528449	3.26422	1.31827
chr1	188498701	188498933	unique_peak1	6	3	0.78675	2.39338	1.23215
chr1	188545498	188546519	unique_peak2	32	56	-0.912404	5.37669	2.03491
chr1	188572595	188573781	merged_common_peak	56	77	-0.612833	5.97899	1.45586
chr1	188609118	188609553	unique_peak1	33	5	2.3766	3.77326	4.83828
chr1	188979191	188980187	merged_common_peak	106	64	0.516822	6.28078	1.47093
chr1	189011021	189011386	unique_peak1	9	12	-0.422879	3.489	0.340566
chr1	189022659	189023843	unique_peak2	42	59	-0.622169	5.59581	1.1936
chr1	189308652	189309068	unique_peak1	48	11	1.8795	4.52471	4.90497
chr1	189329190	189329704	unique_peak1	79	21	1.67959	5.29923	6.34546
chr1	189360129	189360494	unique_peak1	16	10	0.548313	3.73359	0.604423
chr1	189455307	189455719	unique_peak1	25	30	-0.361782	4.77331	0.446094
chr1	189555006	189555341	unique_peak1	21	15	0.362536	4.18127	0.519194
chr1	189566982	189567445	unique_peak1	45	28	0.519545	5.11775	0.913162
chr1	189580353	189580958	unique_peak1	54	39	0.301491	5.47267	0.548322
chr1	189586518	189587068	unique_peak1	44	25	0.646842	5.02386	1.15175
chr1	189712669	189713809	merged_common_peak	117	116	-0.196518	6.77211	0.496398
chr1	189720930	189721252	unique_peak1	20	18	0.0505936	4.27322	0.323898
chr1	189915552	189915943	unique_peak1	35	23	0.455257	4.81259	0.69088
chr1	189942030	189942652	unique_peak1	49	37	0.244338	5.3701	0.470781
chr1	190638563	190639559	merged_common_peak	41	58	-0.630301	5.56749	1.21247
chr1	190689800	190690166	unique_peak1	31	7	1.87814	3.93907	3.43645
chr1	190726472	190726940	unique_peak1	32	6	2.11313	3.86392	4.09376
chr1	190729964	190730449	unique_peak1	47	9	2.11416	4.37901	5.54974
chr1	190817081	190817495	unique_peak1	26	18	0.396421	4.44614	0.549582
chr1	190830714	190832129	unique_peak2	63	77	-0.45344	6.05868	0.951659
chr1	191711383	191711725	unique_peak1	26	18	0.396421	4.44614	0.549582
chr1	191865969	191866615	unique_peak1	133	69	0.719538	6.48905	2.82491
chr1	191872056	191873174	merged_common_peak	115	97	0.0356132	6.63252	0.310951
chr1	191881727	191883930	unique_peak2	138	154	-0.376892	7.08768	1.2781
chr1	191929547	191932733	merged_common_peak	485	247	0.667514	8.28795	7.68692
chr1	191946131	191946582	unique_peak1	103	42	1.07379	5.96316	4.31499
chr1	191953222	191954785	merged_common_peak	157	127	0.0755363	7.03777	0.354082
chr1	191956978	191957453	unique_peak1	56	27	0.865215	5.23996	1.93089
chr1	191971557	191972124	unique_peak1	134	54	1.07769	6.32021	5.3262
chr1	192025506	192026006	unique_peak1	57	31	0.696502	5.34825	1.46742
chr1	192027904	192029289	merged_common_peak	153	88	0.564517	6.75799	2.22487
chr1	192656972	192657422	unique_peak1	29	11	1.20437	4.18715	1.96542
chr1	192704383	192704912	unique_peak1	47	31	0.436091	5.21805	0.725459
chr1	192726277	192727287	unique_peak2	25	64	-1.42995	5.30739	4.39778
chr1	192735023	192736189	unique_peak2	38	64	-0.872004	5.58637	2.02644
chr1	192751577	192753455	unique_peak2	63	114	-1.01353	6.33873	4.50684
chr1	192849046	192850777	unique_peak2	72	117	-0.869622	6.44783	3.57261
chr1	192886250	192887660	merged_common_peak	61	99	-0.855582	6.21607	3.06929
chr1	192944560	192945212	unique_peak2	24	53	-1.21644	5.14667	2.94384
chr1	193005623	193009056	unique_peak2	152	281	-1.10827	7.58542	12.4368
chr1	193047317	193049538	unique_peak2	99	156	-0.848534	6.87035	4.61461
chr1	193078177	193078760	unique_peak1	54	57	-0.234562	5.7407	0.432263
chr1	193087358	193087714	unique_peak1	35	30	0.0860233	4.99721	0.332063
chr1	193135791	193137159	unique_peak2	50	82	-0.855524	5.94728	2.52959
chr1	193141053	193142528	unique_peak2	53	78	-0.705612	5.95097	1.86708
chr1	193149248	193150679	unique_peak2	79	86	-0.303919	6.29098	0.658002
chr1	193215190	193215582	unique_peak1	62	21	1.35086	5.13486	3.88569
chr1	193219484	193222216	unique_peak2	134	222	-0.941848	7.32998	7.64281
chr1	193243842	193246771	merged_common_peak	185	164	-0.0662774	7.33318	0.325309
chr1	193267726	193271069	merged_common_peak	388	277	0.196415	8.21715	0.944261
chr1	193282510	193282963	unique_peak1	32	24	0.276629	4.78217	0.446094
chr1	193296331	193296795	unique_peak1	40	20	0.826865	4.80575	1.41894
chr1	193303300	193304690	merged_common_peak	144	132	-0.0978976	7.00633	0.355326
chr1	193398596	193400649	merged_common_peak	107	144	-0.627919	6.86595	2.59907
chr1	193411550	193411886	unique_peak1	22	17	0.25378	4.29681	0.39263
chr1	193452301	193452722	unique_peak1	71	59	0.0871501	5.95047	0.345178
chr1	193456617	193456946	unique_peak1	36	37	-0.170005	5.16293	0.328564
chr1	193463976	193464412	unique_peak1	49	34	0.362982	5.31077	0.634706
chr1	193464915	193466207	merged_common_peak	101	82	0.0982967	6.42419	0.363271
chr1	193487491	193487929	unique_peak1	35	17	0.870295	4.60507	1.43262
chr1	193540892	193543669	unique_peak2	101	169	-0.936055	6.94136	5.77745
chr1	193582083	193583190	unique_peak2	51	62	-0.431044	5.76176	0.750695
chr1	193616581	193618488	merged_common_peak	208	173	0.0175344	7.45171	0.30663
chr1	193701619	193701927	unique_peak1	22	22	-0.0998571	4.47363	0.30608
chr1	193707586	193708228	unique_peak1	53	21	1.13874	5.0288	2.6577
chr1	193729446	193733666	unique_peak2	206	271	-0.640217	7.76735	4.8234
chr1	193770533	193771010	unique_peak1	36	10	1.61849	4.26868	3.30472
chr1	193779674	193781495	unique_peak2	105	121	-0.404469	6.7285	1.16107
chr1	193787739	193789577	merged_common_peak	95	98	-0.239444	6.50963	0.535112
chr1	193899280	193900247	merged_common_peak	140	106	0.177424	6.83018	0.516421
chr1	193960151	193963102	unique_peak2	138	177	-0.576501	7.18748	2.78492
chr1	194273989	194274356	unique_peak1	31	22	0.35458	4.70085	0.510322
chr1	194436110	194436624	unique_peak1	51	16	1.45877	4.81685	3.76198
chr1	194495497	194497724	unique_peak2	78	127	-0.878285	6.56086	3.93403
chr1	194644496	194644931	unique_peak1	39	22	0.661641	4.85438	1.04214
chr1	194916231	194916803	unique_peak1	26	30	-0.309848	4.79927	0.39987
chr1	194955650	194956936	merged_common_peak	76	79	-0.235499	6.20418	0.479937
chr1	194978810	194980623	unique_peak2	90	105	-0.411613	6.52211	1.03688
chr1	194982214	194982809	unique_peak1	53	34	0.468886	5.36373	0.822616
chr1	194998753	195001003	merged_common_peak	152	164	-0.335036	7.1988	1.10431
chr1	195068283	195068883	unique_peak1	92	69	0.216941	6.23775	0.509714
chr1	195098421	195099431	unique_peak1	108	133	-0.501416	6.81538	1.68273
chr1	195113461	195116928	merged_common_peak	365	282	0.086832	8.18807	0.435514
chr1	195136526	195138711	merged_common_peak	123	135	-0.345368	6.91478	1.00609
chr1	195152187	195153382	unique_peak1	102	73	0.277308	6.34811	0.686734
chr1	195153657	195154403	unique_peak1	85	66	0.172454	6.15232	0.454077
chr1	195189729	195190932	unique_peak2	41	56	-0.580548	5.54262	1.05414
chr1	195458606	195459576	merged_common_peak	36	69	-1.05136	5.6036	2.93576
chr1	196134800	196135181	unique_peak1	30	17	0.664528	4.50219	0.988723
chr1	196144203	196145384	merged_common_peak	263	147	0.572496	7.4957	3.47523
chr1	196189247	196190824	merged_common_peak	251	127	0.717934	7.35897	4.88199
chr1	196308014	196309696	merged_common_peak	423	256	0.428286	8.21977	3.23376
chr1	196413761	196414059	unique_peak1	12	4	1.31667	2.98026	1.85744
chr1	196486575	196486979	unique_peak1	31	26	0.123254	4.81651	0.336581
chr1	196705324	196706611	merged_common_peak	65	86	-0.568637	6.15863	1.39915
chr1	196801972	196804629	unique_peak2	108	177	-0.91106	7.0202	5.75346
chr1	196807965	196808404	unique_peak1	43	28	0.458376	5.08717	0.763288
chr1	196821404	196821759	unique_peak1	25	19	0.270487	4.45717	0.427564
chr1	196842862	196844838	merged_common_peak	129	129	-0.215249	6.91474	0.561643
chr1	196917896	196919035	merged_common_peak	50	58	-0.363128	5.70108	0.602366
chr1	196956804	196957973	merged_common_peak	63	65	-0.212431	5.93818	0.415025
chr1	197047750	197048738	merged_common_peak	141	45	1.40505	6.22609	8.30985
chr1	197056487	197056927	unique_peak1	42	19	0.962794	4.80332	1.82978
chr1	197066676	197068589	merged_common_peak	327	534	-0.98275	8.57202	19.3062
chr10	3133110	3135824	unique_peak2	148	168	-0.406048	7.19786	1.4784
chr10	3137168	3137622	unique_peak1	40	25	0.518742	4.95981	0.808569
chr10	3147937	3148334	unique_peak1	24	10	1.07901	3.99894	1.4438
chr10	3186870	3188054	unique_peak2	50	68	-0.589009	5.81402	1.22876
chr10	3196332	3198020	unique_peak2	80	102	-0.530382	6.42131	1.5138
chr10	3227439	3228503	merged_common_peak	104	72	0.323401	6.35152	0.783046
chr10	4521471	4523453	unique_peak2	74	99	-0.593641	6.34704	1.74391
chr10	4621370	4622431	unique_peak1	80	51	0.455679	5.92828	1.01621
chr10	5133531	5133866	unique_peak1	28	14	0.83579	4.32479	1.21174
chr10	5263110	5265621	unique_peak2	96	115	-0.453809	6.63108	1.28189
chr10	5607883	5608502	unique_peak1	49	35	0.32234	5.3311	0.573175
chr10	5678975	5679827	merged_common_peak	96	67	0.316709	6.24582	0.764984
chr10	5720465	5722180	merged_common_peak	240	221	-0.137899	7.72547	0.486412
chr10	5725145	5725820	unique_peak1	103	72	0.310232	6.34494	0.783046
chr10	5741306	5741725	unique_peak1	37	31	0.11462	5.05731	0.353704
chr10	5759381	5759846	unique_peak1	44	25	0.646842	5.02386	1.15175
chr10	5913077	5914765	unique_peak2	83	106	-0.535304	6.47382	1.54295
chr10	5956953	5960322	merged_common_peak	160	204	-0.578061	7.39045	3.17829
chr10	5998667	5999711	merged_common_peak	37	43	-0.344812	5.28703	0.479516
chr10	6372209	6373729	unique_peak2	47	76	-0.830695	5.85144	2.31449
chr10	6402297	6402715	unique_peak1	26	12	0.943908	4.17239	1.31435
chr10	6605308	6606428	unique_peak2	40	66	-0.846907	5.64264	2.09825
chr10	6628087	6628493	unique_peak1	34	20	0.609137	4.69689	0.907815
chr10	6639985	6640355	unique_peak1	39	21	0.725772	4.82232	1.16837
chr10	7229064	7235478	merged_common_peak	3036	2563	-0.180931	11.2337	4.38114
chr10	7235981	7237300	unique_peak1	596	475	0.00996272	8.8998	0.304672
chr10	7308923	7310595	merged_common_peak	73	92	-0.507415	6.28545	1.31434
chr10	7382180	7384446	merged_common_peak	109	154	-0.698884	6.92668	3.3658
chr10	7456489	7457617	merged_common_peak	99	65	0.401692	6.24524	0.994907
chr10	7458238	7458428	unique_peak1	1	6	-1.7445	1.93511	1.26211
chr10	7512173	7513241	merged_common_peak	60	81	-0.591654	6.06173	1.48157
chr10	7571552	7571924	unique_peak1	28	13	0.935326	4.27502	1.38792
chr10	7584627	7585081	unique_peak1	29	11	1.20437	4.18715	1.96542
chr10	7675334	7676852	unique_peak2	49	72	-0.697559	5.84104	1.6663
chr10	7806563	7807713	merged_common_peak	188	104	0.607817	7.01815	2.90018
chr10	7947853	7948129	unique_peak1	23	14	0.575379	4.19458	0.690311
chr10	8507071	8507371	unique_peak1	17	9	0.76447	3.70416	0.844317
chr10	8553583	8554086	unique_peak1	31	23	0.293179	4.73155	0.451698
chr10	8593230	8593879	unique_peak1	61	38	0.502872	5.53684	0.97963
chr10	8604775	8606701	merged_common_peak	158	121	0.153481	7.00748	0.491248
chr10	8702628	8703001	unique_peak1	33	7	1.96157	3.98078	3.85629
chr10	8703141	8703521	unique_peak1	31	10	1.41871	4.16879	2.39922
chr10	9295431	9295775	unique_peak1	26	18	0.396421	4.44614	0.549582
chr10	9573170	9575292	unique_peak2	83	120	-0.7127	6.56251	2.69221
chr10	9620140	9621945	unique_peak2	84	100	-0.435763	6.44033	1.07922
chr10	10162988	10163237	unique_peak1	10	5	0.823752	2.99684	1.47723
chr10	10168653	10169583	merged_common_peak	139	108	0.140912	6.83864	0.438239
chr10	10277268	10278486	merged_common_peak	72	81	-0.344531	6.18529	0.682547
chr10	10299332	10300422	merged_common_peak	321	204	0.37576	7.86736	2.0822
chr10	10300576	10300990	unique_peak1	51	14	1.63935	4.72656	4.39313
chr10	10566540	10566898	unique_peak1	25	5	2.00745	3.58869	3.24128
chr10	10868839	10870229	unique_peak2	50	86	-0.923428	5.98123	2.97496
chr10	11000002	11001542	unique_peak2	79	110	-0.655391	6.46672	2.24744
chr10	11062740	11064014	unique_peak2	57	71	-0.473423	5.93321	0.940907
chr10	11072222	11073183	unique_peak2	30	55	-0.972902	5.3209	2.07758
chr10	11211527	11212468	merged_common_peak	28	75	-1.50525	5.4953	5.40529
chr10	12192177	12192609	unique_peak1	40	12	1.51874	4.45981	3.20553
chr10	12307915	12308345	unique_peak1	43	10	1.85693	4.38789	4.48643
chr10	12362924	12363705	merged_common_peak	49	47	-0.0926973	5.53861	0.310472
chr10	12529519	12529974	unique_peak1	46	12	1.70668	4.55378	4.13403
chr10	12536939	12537529	unique_peak1	42	29	0.377831	5.09581	0.621525
chr10	12572818	12573069	unique_peak1	5	9	-0.7473	2.94828	1.11708
chr10	12573259	12575233	unique_peak2	95	98	-0.239444	6.50963	0.535112
chr10	12586396	12589891	unique_peak2	143	178	-0.535954	7.21584	2.49563
chr10	12641999	12643466	merged_common_peak	87	83	-0.122139	6.33125	0.3499
chr10	12716985	12717194	unique_peak1	5	7	-0.425372	2.78731	0.979903
chr10	12727858	12729093	unique_peak2	49	76	-0.774521	5.87953	2.04503
chr10	12912434	12913334	unique_peak2	39	44	-0.30665	5.33853	0.475038
chr10	13121700	13122411	unique_peak2	20	119	-2.60837	5.60271	17.2758
chr10	13272344	13273578	merged_common_peak	77	94	-0.46567	6.33702	1.13695
chr10	13558510	13558953	unique_peak1	47	23	0.851129	5.01053	1.63799
chr10	13587870	13589292	merged_common_peak	67	90	-0.592408	6.21159	1.61274
chr10	13683922	13688178	merged_common_peak	235	279	-0.501616	7.87848	3.30235
chr10	13702300	13704645	merged_common_peak	158	128	0.0729909	7.04772	0.35368
chr10	13750355	13750665	unique_peak1	23	10	1.02284	3.97085	1.30249
chr10	14424653	14425817	unique_peak2	47	54	-0.345269	5.60873	0.572488
chr10	14697038	14697429	unique_peak1	25	14	0.685524	4.24965	0.879255
chr10	15466349	15467268	merged_common_peak	129	66	0.741029	6.4366	2.91193
chr10	16356804	16357103	unique_peak1	28	17	0.572756	4.4563	0.798885
chr10	17053825	17054035	unique_peak1	3	7	-0.983322	2.50834	1.09385
chr10	17127911	17128321	unique_peak1	28	11	1.15772	4.16382	1.81053
chr10	17196188	17197088	merged_common_peak	39	42	-0.241061	5.30573	0.401351
chr10	17271849	17272480	unique_peak1	77	9	2.78226	4.71306	11.6668
chr10	17371190	17371598	unique_peak1	31	12	1.1777	4.28929	1.87884
chr10	17381818	17382166	unique_peak1	26	17	0.474423	4.40714	0.633951
chr10	17388230	17388573	unique_peak1	20	9	0.976593	3.81022	1.23014
chr10	17403275	17404838	merged_common_peak	138	83	0.506915	6.64577	1.70168
chr10	17441250	17444625	merged_common_peak	386	343	-0.118001	8.36726	0.523499
chr10	17650210	17651172	merged_common_peak	56	49	0.0287134	5.65821	0.309716
chr10	17666680	17668697	merged_common_peak	84	114	-0.623042	6.53397	2.06117
chr10	17703064	17703468	unique_peak1	36	21	0.618491	4.76868	0.97462
chr10	17741793	17743350	unique_peak2	70	98	-0.654562	6.30208	1.9665
chr10	17767377	17768210	merged_common_peak	62	47	0.225329	5.69763	0.472014
chr10	17774801	17775857	unique_peak2	45	62	-0.599754	5.6774	1.14144
chr10	17785389	17786883	merged_common_peak	140	101	0.246465	6.79566	0.692817
chr10	17788685	17789161	unique_peak1	46	25	0.70668	5.05378	1.248
chr10	17877714	17878088	unique_peak1	21	14	0.455645	4.13471	0.607096
chr10	17954150	17955708	merged_common_peak	124	106	0.0116811	6.74731	0.305089
chr10	17996028	17996579	unique_peak1	65	18	1.62638	5.06112	5.29573
chr10	18120918	18121202	unique_peak1	15	13	0.116966	3.86584	0.332077
chr10	18128921	18129336	unique_peak1	43	20	0.92404	4.85434	1.77675
chr10	18155386	18155691	unique_peak1	19	13	0.424027	4.01937	0.546773
chr10	18230532	18230759	unique_peak1	7	9	-0.351429	3.14621	1.03275
chr10	18247542	18247879	unique_peak1	21	12	0.662096	4.03149	0.84084
chr10	18321891	18322172	unique_peak1	14	10	0.376079	3.64747	0.446473
chr10	18564178	18565447	unique_peak2	60	71	-0.404027	5.96791	0.804634
chr10	18734379	18735798	unique_peak2	57	84	-0.712889	6.05295	1.95145
chr10	19146984	19148961	unique_peak2	77	87	-0.355246	6.28181	0.753034
chr10	19163317	19163789	unique_peak1	37	18	0.866693	4.68127	1.50629
chr10	19183327	19184342	merged_common_peak	115	57	0.792342	6.25415	2.89136
chr10	19234158	19235043	unique_peak2	41	43	-0.207089	5.35589	0.368093
chr10	19252572	19252926	unique_peak1	26	16	0.556885	4.36591	0.733542
chr10	19269218	19269556	unique_peak1	22	13	0.61635	4.11553	0.713635
chr10	19310869	19312574	unique_peak2	59	108	-1.02503	6.25567	4.28549
chr10	19351211	19352116	merged_common_peak	67	39	0.593458	5.61866	1.27571
chr10	19596779	19597804	merged_common_peak	187	112	0.494583	7.06747	2.08004
chr10	19626653	19628324	merged_common_peak	93	91	-0.162621	6.44225	0.402746
chr10	19635088	19635465	unique_peak1	24	16	0.450981	4.31295	0.57534
chr10	19652999	19655289	merged_common_peak	134	193	-0.740861	7.22948	4.51182
chr10	19665510	19665960	unique_peak1	53	34	0.468886	5.36373	0.822616
chr10	19666524	19667005	unique_peak1	36	29	0.171032	4.99241	0.38729
chr10	19765571	19766313	unique_peak1	60	25	1.06546	5.23317	2.66762
chr10	19790404	19790935	unique_peak1	63	34	0.70268	5.48062	1.57714
chr10	19791345	19791808	unique_peak1	68	33	0.848013	5.51147	2.13991
chr10	19797032	19797651	unique_peak1	51	35	0.376311	5.35808	0.683735
chr10	19824049	19825456	unique_peak2	57	69	-0.432781	5.91289	0.821391
chr10	19867874	19869929	unique_peak2	108	111	-0.242682	6.68601	0.571155
chr10	19884627	19885262	unique_peak1	83	52	0.478243	5.96704	1.13944
chr10	19888954	19889424	unique_peak1	61	34	0.658991	5.45878	1.38722
chr10	19906261	19907368	merged_common_peak	73	60	0.101006	5.98124	0.344471
chr10	19940193	19941349	merged_common_peak	108	80	0.224823	6.45226	0.580562
chr10	20031195	20033287	merged_common_peak	134	171	-0.567213	7.14266	2.604
chr10	20066907	20068089	merged_common_peak	65	71	-0.295618	6.02212	0.541905
chr10	20179182	20180184	merged_common_peak	500	491	-0.278975	8.80303	2.09623
chr10	20223495	20223803	unique_peak1	15	12	0.223881	3.81238	0.373562
chr10	20309590	20310618	merged_common_peak	85	57	0.380562	6.04826	0.892451
chr10	20350012	20350586	unique_peak1	42	31	0.284722	5.14236	0.499999
chr10	20468698	20469092	unique_peak1	24	13	0.731089	4.1729	0.912224
chr10	20495302	20496743	merged_common_peak	75	62	0.0911612	6.02286	0.343123
chr10	20550207	20550527	unique_peak1	21	15	0.362536	4.18127	0.519194
chr10	20671442	20672957	unique_peak2	71	92	-0.545118	6.2666	1.39827
chr10	20685604	20686637	merged_common_peak	75	54	0.287081	5.9249	0.604904
chr10	20765619	20767083	unique_peak2	75	86	-0.374502	6.25569	0.814709
chr10	21013924	21014704	unique_peak1	86	48	0.639742	5.93458	1.68587
chr10	21015086	21016589	merged_common_peak	152	101	0.35886	6.85186	1.14577
chr10	21096742	21097352	unique_peak1	74	30	1.09602	5.50221	3.30541
chr10	21097998	21099149	merged_common_peak	119	89	0.205121	6.59441	0.554436
chr10	21146259	21146650	unique_peak1	29	17	0.619407	4.47963	0.890873
chr10	21161388	21162022	unique_peak1	126	74	0.546172	6.5019	1.84041
chr10	21163915	21164655	unique_peak1	75	58	0.185798	5.97554	0.441863
chr10	21179772	21180193	unique_peak1	40	9	1.89725	4.27056	4.2732
chr10	21184038	21186209	merged_common_peak	122	124	-0.234831	6.84837	0.607237
chr10	21405137	21406693	merged_common_peak	79	96	-0.460888	6.36947	1.18897
chr10	21632428	21632869	unique_peak1	40	20	0.826865	4.80575	1.41894
chr10	21656419	21656774	unique_peak1	28	16	0.655218	4.41507	0.918918
chr10	21712425	21716596	merged_common_peak	205	286	-0.724324	7.80274	6.28248
chr10	21719763	21722125	merged_common_peak	147	130	-0.0478582	7.00949	0.308635
chr10	21754365	21754721	unique_peak1	31	23	0.293179	4.73155	0.451698
chr10	21756201	21756436	unique_peak1	5	8	-0.595297	2.87228	1.03789
chr10	21777707	21779132	unique_peak2	66	66	-0.171089	5.98054	0.363096
chr10	21861677	21863209	merged_common_peak	220	202	-0.128034	7.60132	0.444343
chr10	21896308	21896702	unique_peak1	27	12	0.993953	4.19742	1.44788
chr10	21977451	21978381	merged_common_peak	179	167	-0.137394	7.32362	0.434075
chr10	22084661	22085122	unique_peak1	47	5	2.85113	4.01053	7.78488
chr10	22167718	22168621	merged_common_peak	118	140	-0.454093	6.91251	1.52915
chr10	22190074	22191331	merged_common_peak	68	85	-0.490789	6.18087	1.16162
chr10	22450513	22452121	unique_peak2	53	85	-0.828096	6.01222	2.56594
chr10	22494500	22494818	unique_peak1	18	7	1.1608	3.5804	1.38887
chr10	23209629	23210015	unique_peak1	26	4	2.32242	3.48314	3.9781
chr10	23330941	23331382	unique_peak1	49	26	0.737378	5.12358	1.41869
chr10	23431186	23431580	unique_peak1	28	17	0.572756	4.4563	0.798885
chr10	23483421	23484205	unique_peak2	28	36	-0.466773	4.97607	0.581177
chr10	23506130	23507934	unique_peak2	90	111	-0.491047	6.56183	1.39844
chr10	23531132	23532570	merged_common_peak	113	95	0.0414282	6.60568	0.31894
chr10	23570689	23572392	merged_common_peak	117	109	-0.107513	6.7276	0.351467
chr10	23642256	23642718	unique_peak1	41	24	0.608486	4.9481	0.993451
chr10	23643675	23644159	unique_peak1	58	30	0.765829	5.33711	1.7033
chr10	23698712	23699656	unique_peak2	23	42	-0.943995	4.95427	1.6812
chr10	23794475	23794939	unique_peak1	34	20	0.609137	4.69689	0.907815
chr10	24031963	24032538	unique_peak1	33	11	1.3766	4.27326	2.45535
chr10	24036027	24037710	merged_common_peak	98	106	-0.309211	6.58686	0.754242
chr10	24059386	24059711	unique_peak1	22	7	1.4237	3.71185	1.89174
chr10	24191374	24191721	unique_peak1	22	5	1.83874	3.50433	2.59996
chr10	24254451	24255475	merged_common_peak	87	73	0.0607249	6.23982	0.324195
chr10	24358029	24358486	unique_peak1	50	28	0.661534	5.18875	1.26139
chr10	24417808	24418886	merged_common_peak	72	65	-0.0313728	6.02871	0.30103
chr10	24430969	24432232	unique_peak2	55	65	-0.39618	5.8463	0.727096
chr10	24552638	24553271	unique_peak1	44	24	0.703425	4.99557	1.27782
chr10	24589200	24590430	merged_common_peak	106	86	0.096246	6.49107	0.360488
chr10	24638715	24639489	unique_peak1	94	71	0.205578	6.27271	0.504283
chr10	24646752	24647531	unique_peak1	120	81	0.350842	6.53297	0.975364
chr10	24667292	24669554	merged_common_peak	228	167	0.193917	7.48928	0.679378
chr10	25016136	25017328	merged_common_peak	68	68	-0.173049	6.022	0.383553
chr10	25079190	25080223	unique_peak2	38	52	-0.577556	5.43914	0.936258
chr10	25114981	25116538	merged_common_peak	133	91	0.325259	6.68619	0.90958
chr10	25177799	25179292	unique_peak2	36	57	-0.780058	5.46795	1.57714
chr10	25239673	25240078	unique_peak1	36	29	0.171032	4.99241	0.38729
chr10	25255729	25256279	unique_peak1	69	27	1.14792	5.38132	3.3721
chr10	25259180	25260361	merged_common_peak	176	107	0.476908	6.99334	1.87068
chr10	25315796	25316180	unique_peak1	43	18	1.06843	4.78214	2.15925
chr10	25316686	25316941	unique_peak1	14	10	0.376079	3.64747	0.446473
chr10	25338940	25340087	merged_common_peak	126	102	0.0884905	6.73075	0.366599
chr10	25648186	25648640	unique_peak1	31	26	0.123254	4.81651	0.336581
chr10	26440020	26440439	unique_peak1	26	5	2.05939	3.61466	3.46164
chr10	26491870	26492897	merged_common_peak	55	52	-0.0797067	5.68807	0.309546
chr10	26569713	26570155	unique_peak1	38	11	1.5654	4.36766	3.34305
chr10	26575336	26576946	merged_common_peak	210	138	0.354642	7.29626	1.40346
chr10	26639901	26640851	merged_common_peak	75	50	0.396016	5.87043	0.839306
chr10	27353983	27354276	unique_peak1	18	4	1.83887	3.24136	2.39354
chr10	27793939	27795533	unique_peak2	70	103	-0.725645	6.33762	2.41476
chr10	27807132	27807508	unique_peak1	29	22	0.26577	4.65645	0.457753
chr10	27815645	27816608	merged_common_peak	132	62	0.861233	6.4079	3.68752
chr10	27837395	27837762	unique_peak1	31	15	0.878142	4.43907	1.28534
chr10	27886852	27887201	unique_peak1	21	18	0.114608	4.30523	0.35119
chr10	27947973	27948268	unique_peak1	11	15	-0.471551	3.76422	0.373562
chr10	27991919	27992251	unique_peak1	22	9	1.10178	3.87282	1.37308
chr10	28142060	28143012	merged_common_peak	114	62	0.661129	6.30784	2.25474
chr10	28179799	28180157	unique_peak1	48	24	0.820609	5.05416	1.59745
chr10	28367572	28368142	unique_peak1	79	35	0.969099	5.65447	2.88355
chr10	28764446	28764889	unique_peak1	34	10	1.54202	4.23044	2.93262
chr10	28778631	28778979	unique_peak1	23	6	1.67492	3.64481	2.41165
chr10	29032671	29033875	unique_peak2	59	72	-0.446672	5.96649	0.861324
chr10	29071166	29071584	unique_peak1	29	16	0.701869	4.4384	1.02078
chr10	29081034	29082540	merged_common_peak	93	96	-0.238972	6.48043	0.540383
chr10	29720436	29721335	merged_common_peak	62	46	0.255703	5.68244	0.514262
chr10	29852098	29852547	unique_peak1	49	14	1.58537	4.69958	4.02189
chr10	29919818	29920652	unique_peak2	28	48	-0.872029	5.1787	1.59509
chr10	30046284	30047365	merged_common_peak	176	76	0.965009	6.74929	5.66082
chr10	30319469	30321194	unique_peak2	78	108	-0.646469	6.44495	2.07624
chr10	30337585	30338615	unique_peak2	48	63	-0.535535	5.73223	1.03755
chr10	30472285	30472736	unique_peak1	48	24	0.820609	5.05416	1.59745
chr10	30522342	30523824	unique_peak2	50	68	-0.589009	5.81402	1.22876
chr10	30529811	30531282	merged_common_peak	52	83	-0.81987	5.98238	2.35648
chr10	30562013	30563194	unique_peak2	43	60	-0.61438	5.62355	1.1755
chr10	31032399	31033986	unique_peak2	50	81	-0.838037	5.93853	2.42291
chr10	31164921	31166322	unique_peak2	52	77	-0.712955	5.92892	1.77539
chr10	31216752	31217091	unique_peak1	17	17	-0.0835265	4.12816	0.30103
chr10	31237010	31237812	unique_peak2	35	40	-0.317332	5.19889	0.447011
chr10	31245300	31246215	merged_common_peak	58	47	0.135063	5.65249	0.37925
chr10	31271537	31272069	unique_peak1	65	18	1.62638	5.06112	5.29573
chr10	31305315	31305651	unique_peak1	40	13	1.41183	4.51327	2.90876
chr10	31314540	31314871	unique_peak1	21	15	0.362536	4.18127	0.519194
chr10	31326627	31329367	unique_peak2	115	133	-0.415766	6.85821	1.31936
chr10	31364336	31364630	unique_peak1	14	6	1.02816	3.32143	1.01573
chr10	33536690	33537141	unique_peak1	34	32	-0.0429397	5.02292	0.30103
chr10	33585499	33586392	merged_common_peak	31	42	-0.548123	5.1522	0.820829
chr10	33714170	33714492	unique_peak1	21	9	1.04061	3.84223	1.37308
chr10	33738781	33740104	unique_peak2	75	82	-0.306598	6.22174	0.629493
chr10	33846938	33848056	unique_peak2	45	59	-0.529365	5.64221	0.92534
chr10	33856241	33856713	unique_peak1	67	23	1.33042	5.25017	4.01185
chr10	34001416	34003138	merged_common_peak	93	120	-0.557922	6.6399	1.8626
chr10	34016978	34018130	unique_peak2	38	65	-0.89403	5.59738	2.13486
chr10	34692448	34692796	unique_peak1	22	3	2.4237	3.21185	3.59865
chr10	36637428	36638467	unique_peak2	34	49	-0.642402	5.32266	1.08158
chr10	36693481	36695253	unique_peak2	83	132	-0.849119	6.63072	3.89547
chr10	36798407	36798695	unique_peak1	12	9	0.316665	3.48026	0.394412
chr10	36856755	36857140	unique_peak1	28	22	0.219119	4.63312	0.412012
chr10	36967523	36967839	unique_peak1	22	12	0.723265	4.06207	0.84084
chr10	36991556	36992569	merged_common_peak	226	98	0.944807	7.10176	6.91675
chr10	36994708	36996326	merged_common_peak	211	124	0.514305	7.22294	2.48098
chr10	37045248	37046400	merged_common_peak	177	89	0.747695	6.8657	3.81876
chr10	37199764	37200849	merged_common_peak	103	63	0.500057	6.25003	1.41268
chr10	38158851	38159282	unique_peak1	31	16	0.790679	4.4828	1.12828
chr10	38853206	38854206	merged_common_peak	58	45	0.196463	5.62179	0.442998
chr10	38882939	38883273	unique_peak1	34	13	1.1941	4.4044	2.09888
chr10	38885886	38886381	unique_peak1	45	23	0.792563	4.98124	1.52482
chr10	38891636	38892037	unique_peak1	46	25	0.70668	5.05378	1.248
chr10	39088892	39090022	unique_peak2	37	59	-0.792271	5.51076	1.64648
chr10	39099669	39100262	unique_peak1	49	20	1.09995	4.94229	2.44377
chr10	39334448	39334859	unique_peak1	36	20	0.685605	4.73512	1.09827
chr10	39345431	39346042	unique_peak1	45	30	0.42333	5.16586	0.737358
chr10	39450825	39453209	unique_peak2	92	149	-0.882595	6.78752	4.73257
chr10	39618216	39619673	unique_peak2	57	93	-0.858087	6.12555	2.85311
chr10	39679187	39680549	merged_common_peak	81	77	-0.112399	6.2292	0.337471
chr10	39691008	39691861	unique_peak2	31	38	-0.407261	5.08177	0.564347
chr10	39710697	39712019	unique_peak2	61	70	-0.361473	5.96901	0.692839
chr10	39726458	39727585	merged_common_peak	163	109	0.345465	6.95409	1.14127
chr10	39744176	39745504	unique_peak2	72	86	-0.429922	6.22798	0.937275
chr10	39771817	39772303	unique_peak1	41	17	1.08242	4.71113	2.08714
chr10	39783256	39783555	unique_peak1	24	9	1.21652	3.93019	1.67711
chr10	39789049	39789551	unique_peak1	40	26	0.464295	4.98703	0.720236
chr10	39797423	39797717	unique_peak1	14	17	-0.334414	4.00272	0.364172
chr10	39838673	39839232	unique_peak1	65	42	0.448042	5.65029	0.92534
chr10	39844359	39845729	merged_common_peak	113	102	-0.0601098	6.65645	0.310753
chr10	39860430	39862543	unique_peak2	98	164	-0.934066	6.89929	5.67478
chr10	39896421	39898262	merged_common_peak	97	123	-0.53591	6.68624	1.73092
chr10	39907198	39907612	unique_peak1	33	27	0.154211	4.88446	0.36098
chr10	39932256	39932562	unique_peak1	13	16	-0.346891	3.91402	0.368541
chr10	39966105	39968219	unique_peak2	84	108	-0.545736	6.49532	1.60033
chr10	39976121	39979123	merged_common_peak	196	192	-0.213347	7.48578	0.711423
chr10	40021493	40022793	merged_common_peak	78	83	-0.270602	6.25702	0.541175
chr10	40047560	40048729	merged_common_peak	84	61	0.268252	6.08832	0.614533
chr10	40068189	40070090	merged_common_peak	104	115	-0.344756	6.6856	0.90958
chr10	40091372	40091847	unique_peak1	64	27	1.04594	5.33033	2.81362
chr10	40092984	40093341	unique_peak1	38	14	1.24347	4.52863	2.47671
chr10	40218637	40220356	merged_common_peak	151	128	0.011035	7.01674	0.304397
chr10	40236279	40236662	unique_peak1	37	12	1.41418	4.40753	2.8534
chr10	40317858	40318120	unique_peak1	16	5	1.42278	3.29635	1.61682
chr10	40349837	40351986	unique_peak2	107	112	-0.268189	6.68608	0.642998
chr10	40591110	40591446	unique_peak1	26	9	1.32242	3.98314	2.00245
chr10	40602285	40603938	unique_peak2	78	82	-0.253324	6.24838	0.506963
chr10	40724189	40724486	unique_peak1	12	7	0.638594	3.3193	1.31827
chr10	41010794	41011216	unique_peak1	41	26	0.497455	5.00361	0.792515
chr10	41022396	41023408	unique_peak2	51	56	-0.286654	5.68956	0.472014
chr10	41169597	41171659	unique_peak2	91	128	-0.67988	6.67129	2.61589
chr10	41209193	41210736	unique_peak2	68	89	-0.556378	6.21366	1.44267
chr10	41238206	41240144	merged_common_peak	119	155	-0.588428	6.99119	2.49604
chr10	41272347	41274388	merged_common_peak	133	134	-0.227995	6.96282	0.616156
chr10	41278218	41278642	unique_peak1	43	24	0.672501	4.98011	1.1789
chr10	41294407	41294739	unique_peak1	23	7	1.48227	3.74114	2.07034
chr10	41310563	41311050	unique_peak1	47	25	0.735651	5.06827	1.34811
chr10	41324289	41325876	merged_common_peak	106	92	3.0718e-05	6.53917	0.302204
chr10	41331765	41332175	unique_peak1	36	19	0.755994	4.69993	1.2356
chr10	41409665	41410088	unique_peak1	39	25	0.484764	4.94282	0.73413
chr10	41429207	41429605	unique_peak1	38	19	0.828436	4.73615	1.46094
chr10	41528847	41530964	unique_peak2	102	131	-0.557633	6.76558	1.96233
chr10	41606682	41607843	merged_common_peak	65	73	-0.335147	6.04188	0.624068
chr10	41702441	41703102	unique_peak1	66	28	1.03702	5.37649	2.88669
chr10	41711102	41712049	merged_common_peak	66	48	0.28029	5.75485	0.591158
chr10	41750617	41751458	merged_common_peak	60	41	0.373581	5.57911	0.688538
chr10	41922808	41923399	unique_peak1	55	46	0.0936249	5.6014	0.337232
chr10	41950441	41950999	unique_peak1	73	42	0.605479	5.729	1.38301
chr10	41970992	41971507	unique_peak1	80	47	0.571156	5.87054	1.36843
chr10	41993020	41993374	unique_peak1	56	28	0.814589	5.26528	1.77636
chr10	41993770	41994772	unique_peak1	136	118	-0.0155289	6.88705	0.30103
chr10	41997609	41998615	unique_peak1	111	109	-0.179325	6.6917	0.452908
chr10	42197209	42199262	merged_common_peak	100	103	-0.240661	6.58011	0.557095
chr10	42221152	42222787	unique_peak2	78	111	-0.68564	6.46454	2.33535
chr10	42398340	42399404	merged_common_peak	56	67	-0.414893	5.88002	0.773583
chr10	42443633	42444323	unique_peak1	60	39	0.44397	5.54391	0.828688
chr10	42473719	42474719	merged_common_peak	72	50	0.340596	5.84272	0.727096
chr10	42488268	42488827	unique_peak1	76	21	1.627	5.27293	5.9742
chr10	42940705	42941836	merged_common_peak	87	75	0.0222507	6.25905	0.306745
chr10	43030378	43031571	merged_common_peak	89	69	0.17182	6.21519	0.447863
chr10	43032467	43032839	unique_peak1	30	17	0.664528	4.50219	0.988723
chr10	43104398	43104783	unique_peak1	31	31	-0.121858	4.93907	0.315509
chr10	43198531	43200289	unique_peak2	65	111	-0.933048	6.34083	3.81093
chr10	43228712	43229834	merged_common_peak	84	81	-0.135104	6.29	0.351153
chr10	43232762	43233140	unique_peak1	38	24	0.506508	4.89711	0.825715
chr10	43259258	43261402	merged_common_peak	110	157	-0.714087	6.94674	3.52641
chr10	43421354	43421707	unique_peak1	28	13	0.935326	4.27502	1.38792
chr10	43550461	43550868	unique_peak1	30	15	0.834453	4.41723	1.28534
chr10	43648507	43648848	unique_peak1	28	13	0.935326	4.27502	1.38792
chr10	43725144	43726616	merged_common_peak	108	105	-0.163247	6.6463	0.409649
chr10	43930897	43931197	unique_peak1	8	8	-0.0373476	3.15125	1.03275
chr10	43931459	43931661	unique_peak1	4	3	0.32374	2.16187	0.961082
chr10	43954788	43955228	unique_peak1	59	39	0.421225	5.53254	0.828688
chr10	43987210	43988705	unique_peak2	53	87	-0.861262	6.0288	2.78278
chr10	44015630	44016063	unique_peak1	42	31	0.284722	5.14236	0.499999
chr10	44167396	44167717	unique_peak1	16	19	-0.314184	4.16484	0.356936
chr10	44174692	44174979	unique_peak1	12	12	-0.0618462	3.66952	0.30103
chr10	44421974	44422299	unique_peak1	24	19	0.216516	4.43019	0.383878
chr10	44474560	44475166	unique_peak1	48	25	0.764025	5.08245	1.45193
chr10	44484965	44485968	merged_common_peak	130	97	0.202953	6.71619	0.566
chr10	44768295	44768909	unique_peak1	52	30	0.618251	5.26332	1.21121
chr10	44786274	44787995	unique_peak2	84	135	-0.865014	6.65496	4.07593
chr10	44789908	44790362	unique_peak1	67	36	0.705933	5.56242	1.61784
chr10	44930006	44930716	merged_common_peak	57	42	0.270237	5.56138	0.532475
chr10	45325757	45326043	unique_peak1	12	11	0.053631	3.61178	0.310474
chr10	45568793	45569199	unique_peak1	48	14	1.55757	4.68568	3.83966
chr10	46909518	46909786	unique_peak1	11	0	3.52845	1.76422	3.91339
chr10	47302295	47302596	unique_peak1	13	2	2.15561	2.66277	2.79529
chr10	47372209	47372509	unique_peak1	62	6	3.00294	4.30882	10.404
chr10	47373861	47374463	unique_peak1	65	15	1.87431	4.93715	6.37574
chr10	48769168	48769537	unique_peak1	20	2	2.71356	2.94174	4.01305
chr10	50311937	50313210	unique_peak2	68	78	-0.368305	6.11963	0.753641
chr10	51488239	51488587	unique_peak1	21	9	1.04061	3.84223	1.37308
chr10	52079992	52081374	merged_common_peak	177	95	0.654586	6.91226	3.09363
chr10	52100962	52102726	unique_peak2	89	119	-0.605788	6.604	2.06789
chr10	52136603	52138302	unique_peak2	101	120	-0.445527	6.6961	1.30319
chr10	52249411	52249943	unique_peak1	44	26	0.592394	5.05108	1.03647
chr10	52590877	52591380	unique_peak1	91	33	1.24388	5.7094	4.82954
chr10	52834973	52835287	unique_peak1	17	10	0.626967	3.77292	0.69965
chr10	53068030	53068460	unique_peak1	37	30	0.160424	5.03441	0.384631
chr10	53070660	53071054	unique_peak1	34	17	0.831529	4.58569	1.31432
chr10	53102253	53104239	merged_common_peak	252	159	0.401456	7.52266	1.89323
chr10	53114547	53115359	unique_peak1	81	29	1.26611	5.53995	4.40608
chr10	53116895	53117291	unique_peak1	39	18	0.937276	4.71657	1.62918
chr10	53126934	53127994	merged_common_peak	150	75	0.765252	6.63055	3.44226
chr10	53142807	53143365	unique_peak1	55	26	0.893326	5.20155	1.97528
chr10	53316043	53317798	merged_common_peak	78	111	-0.68564	6.46454	2.33535
chr10	53348805	53350167	unique_peak2	63	75	-0.415965	6.03995	0.835692
chr10	53637342	53637645	unique_peak1	13	7	0.740571	3.37029	0.69798
chr10	53649487	53650317	unique_peak1	105	37	1.27834	5.8871	5.55977
chr10	53655604	53656629	merged_common_peak	220	114	0.691812	7.1914	4.09021
chr10	53737852	53738307	unique_peak1	51	22	1.02267	5.0349	2.31341
chr10	53762171	53762593	unique_peak1	47	18	1.18816	4.84201	2.59279
chr10	53792242	53796143	merged_common_peak	337	306	-0.140123	8.19203	0.571725
chr10	54913543	54913907	unique_peak1	28	3	2.74268	3.37134	5.09648
chr10	55032672	55033050	unique_peak1	23	2	2.89731	3.03362	4.53604
chr10	55923816	55924178	unique_peak1	33	13	1.15421	4.38446	1.94791
chr10	57205373	57206888	unique_peak2	56	81	-0.684982	6.01506	1.7946
chr10	57219199	57219519	unique_peak1	20	12	0.598081	3.99948	0.739965
chr10	57251746	57252815	merged_common_peak	85	80	-0.101307	6.2892	0.323304
chr10	57379067	57379348	unique_peak1	18	9	0.838871	3.74136	0.965106
chr10	57686398	57689474	unique_peak1	513	435	-0.0693935	8.73349	0.393153
chr10	57693446	57697053	unique_peak1	551	466	-0.0703398	8.83211	0.406157
chr10	57701699	57702895	merged_common_peak	83	81	-0.151389	6.28186	0.3697
chr10	57717682	57718839	merged_common_peak	50	57	-0.338466	5.68875	0.556612
chr10	57785297	57786922	unique_peak2	69	97	-0.659434	6.28499	1.9878
chr10	57868048	57868451	unique_peak1	25	18	0.344487	4.42017	0.487795
chr10	57868670	57869097	unique_peak1	30	27	0.0270981	4.8209	0.316544
chr10	57908567	57910656	merged_common_peak	101	164	-0.892986	6.91983	5.20223
chr10	57960302	57961409	unique_peak2	61	58	-0.0943689	5.83546	0.318327
chr10	58683614	58686212	unique_peak2	104	146	-0.686447	6.85645	3.09806
chr10	58740413	58740871	unique_peak1	49	33	0.404802	5.28986	0.703514
chr10	58744773	58745825	merged_common_peak	83	71	0.0362383	6.18804	0.314509
chr10	58785430	58786704	merged_common_peak	78	117	-0.760928	6.50218	2.89387
chr10	58906007	58906433	unique_peak1	62	28	0.952311	5.33414	2.36704
chr10	58928372	58928763	unique_peak1	35	11	1.45526	4.31259	2.80071
chr10	58939658	58940092	unique_peak1	40	16	1.13172	4.65332	2.15838
chr10	58966613	58966942	unique_peak1	19	14	0.324492	4.06914	0.466171
chr10	59078421	59080280	unique_peak2	82	108	-0.578501	6.47893	1.77997
chr10	59164899	59166013	unique_peak2	43	52	-0.411563	5.52214	0.641883
chr10	59236852	59237235	unique_peak1	43	23	0.731395	4.95066	1.3096
chr10	59247966	59248329	unique_peak1	30	25	0.134013	4.76745	0.365429
chr10	59250149	59250529	unique_peak1	39	22	0.661641	4.85438	1.04214
chr10	59280277	59280606	unique_peak1	29	17	0.619407	4.47963	0.890873
chr10	59327494	59328512	unique_peak2	31	55	-0.929213	5.34275	2.07758
chr10	59341666	59343187	unique_peak2	90	117	-0.566335	6.59948	1.81904
chr10	59378853	59379305	unique_peak1	73	43	0.572312	5.74559	1.28102
chr10	59383803	59384323	unique_peak1	53	38	0.312767	5.44179	0.554099
chr10	59405023	59407093	merged_common_peak	77	102	-0.582315	6.39534	1.69263
chr10	59413006	59415650	merged_common_peak	148	187	-0.559758	7.27471	2.71491
chr10	59441829	59442275	unique_peak1	51	28	0.688255	5.20211	1.35771
chr10	59464855	59466797	merged_common_peak	112	150	-0.624138	6.92634	2.6863
chr10	59707324	59708373	unique_peak2	41	60	-0.678395	5.59154	1.38267
chr10	59739925	59741904	merged_common_peak	157	144	-0.104373	7.12772	0.364084
chr10	59808856	59810327	unique_peak2	44	79	-0.974647	5.8346	2.95956
chr10	60214736	60216106	merged_common_peak	85	83	-0.153774	6.31543	0.367971
chr10	60241942	60242998	unique_peak2	33	50	-0.71086	5.317	1.27789
chr10	60254830	60255743	merged_common_peak	61	42	0.362009	5.60727	0.680499
chr10	60283406	60283801	unique_peak1	35	21	0.580788	4.74983	0.884952
chr10	60293138	60294843	merged_common_peak	104	123	-0.440971	6.73371	1.344
chr10	60551667	60554156	merged_common_peak	154	188	-0.513085	7.3057	2.44007
chr10	60591492	60591855	unique_peak1	27	13	0.887038	4.25087	1.26025
chr10	60600243	60600753	unique_peak1	41	15	1.25234	4.62617	2.54214
chr10	60608823	60611145	unique_peak2	112	160	-0.71665	6.97259	3.56824
chr10	60738528	60738908	unique_peak1	28	29	-0.16421	4.82479	0.316544
chr10	60762794	60763224	unique_peak1	38	20	0.758047	4.77134	1.30767
chr10	60774951	60776137	merged_common_peak	120	86	0.26545	6.57567	0.712129
chr10	60789638	60791044	merged_common_peak	77	92	-0.434973	6.32167	1.01696
chr10	60836641	60836974	unique_peak1	5	7	-0.425372	2.78731	0.979903
chr10	60845655	60846222	unique_peak1	45	39	0.0555979	5.34973	0.325163
chr10	60875630	60876208	unique_peak1	49	28	0.634284	5.17512	1.16864
chr10	60888795	60889668	unique_peak1	135	92	0.330049	6.70418	0.951951
chr10	60913206	60915808	merged_common_peak	160	187	-0.45317	7.328	1.98326
chr10	60927192	60930259	merged_common_peak	164	163	-0.222362	7.24637	0.647054
chr10	60938087	60939386	unique_peak2	54	66	-0.44267	5.84475	0.848736
chr10	60972320	60973389	merged_common_peak	98	69	0.302973	6.28077	0.70672
chr10	60998754	61000157	unique_peak2	45	65	-0.666868	5.71096	1.38301
chr10	61084565	61084878	unique_peak1	24	11	0.953482	4.0617	1.24083
chr10	61110080	61112300	merged_common_peak	121	130	-0.313703	6.87657	0.879644
chr10	61119628	61120073	unique_peak1	23	23	-0.102692	4.53362	0.305856
chr10	61127167	61128590	unique_peak2	51	73	-0.663218	5.87784	1.53405
chr10	61142657	61143224	unique_peak1	53	42	0.171904	5.51222	0.387953
chr10	61157555	61161515	unique_peak2	164	245	-0.807325	7.53885	6.46149
chr10	61178733	61179530	unique_peak1	53	36	0.388716	5.40381	0.674559
chr10	61196674	61197701	merged_common_peak	67	89	-0.576467	6.20362	1.53453
chr10	61645786	61646226	unique_peak1	39	18	0.937276	4.71657	1.62918
chr10	61802365	61803766	unique_peak2	55	73	-0.56124	5.92883	1.24046
chr10	61911791	61913529	merged_common_peak	109	148	-0.641928	6.8982	2.83147
chr10	61948911	61950574	unique_peak2	69	87	-0.504156	6.20735	1.21621
chr10	62052956	62053385	unique_peak1	39	24	0.541347	4.91453	0.825715
chr10	62064172	62066108	merged_common_peak	93	120	-0.557922	6.6399	1.8626
chr10	62113078	62114897	unique_peak2	88	131	-0.758667	6.66506	3.25164
chr10	62254368	62256340	unique_peak2	89	117	-0.581541	6.59187	1.91101
chr10	62382745	62384011	merged_common_peak	65	75	-0.373621	6.06112	0.71687
chr10	62409214	62410358	unique_peak2	40	65	-0.825212	5.63179	1.9917
chr10	62420759	62421191	unique_peak1	32	14	1.0136	4.41369	1.59386
chr10	62428380	62429901	merged_common_peak	66	88	-0.580734	6.18537	1.45829
chr10	62434631	62435004	unique_peak1	28	22	0.219119	4.63312	0.412012
chr10	62442429	62443731	unique_peak2	51	80	-0.793614	5.94304	2.18457
chr10	62485190	62487872	merged_common_peak	126	176	-0.692615	7.1213	3.63835
chr10	62502557	62503081	unique_peak1	51	36	0.336782	5.37784	0.618527
chr10	62523026	62523566	unique_peak1	111	64	0.579667	6.3122	1.78027
chr10	62525480	62525836	unique_peak1	59	32	0.698759	5.39377	1.53681
chr10	62620895	62621320	unique_peak1	37	24	0.470764	4.87924	0.748982
chr10	62708567	62708982	unique_peak1	64	37	0.60537	5.55061	1.31742
chr10	62709913	62710906	merged_common_peak	145	125	-0.0104375	6.97206	0.30103
chr10	62721424	62721852	unique_peak1	28	19	0.420753	4.5323	0.60469
chr10	62800709	62802602	merged_common_peak	87	147	-0.939275	6.73982	5.13163
chr10	62836185	62836548	unique_peak1	18	24	-0.483057	4.40233	0.487795
chr10	62872705	62873666	merged_common_peak	71	56	0.161151	5.91347	0.416928
chr10	62876398	62876758	unique_peak1	28	4	2.42075	3.5323	4.45581
chr10	62877977	62878396	unique_peak1	39	17	1.01528	4.67756	1.81352
chr10	62891848	62893213	merged_common_peak	76	95	-0.498533	6.3357	1.27669
chr10	63534337	63534670	unique_peak1	14	8	0.665586	3.50272	0.660903
chr10	63547225	63547749	unique_peak1	57	20	1.30418	5.04441	3.50002
chr10	64118524	64118777	unique_peak1	32	3	2.92049	3.46024	5.86906
chr10	64118823	64119196	unique_peak1	63	15	1.83196	4.91598	5.97349
chr10	64328781	64329142	unique_peak1	62	6	3.00294	4.30882	10.404
chr10	64520704	64521197	unique_peak1	46	36	0.197667	5.30829	0.401351
chr10	64827506	64828034	unique_peak1	22	9	1.10178	3.87282	1.37308
chr10	64831386	64831748	unique_peak1	24	5	1.95348	3.5617	3.02404
chr10	66372712	66373755	merged_common_peak	191	83	0.951416	6.86803	5.9326
chr10	66383836	66384403	unique_peak1	49	40	0.134713	5.42491	0.364934
chr10	66390870	66392006	merged_common_peak	160	96	0.501506	6.85067	1.87585
chr10	66466977	66467382	unique_peak1	24	16	0.450981	4.31295	0.57534
chr10	66484161	66484788	unique_peak1	155	76	0.79122	6.6624	3.71983
chr10	66488044	66489874	merged_common_peak	244	171	0.252904	7.55272	0.969555
chr10	66510740	66511165	unique_peak1	39	13	1.37785	4.49628	2.74005
chr10	66528212	66528622	unique_peak1	24	9	1.21652	3.93019	1.67711
chr10	66546376	66546956	unique_peak1	61	39	0.466346	5.5551	0.895299
chr10	66548995	66551039	merged_common_peak	218	164	0.15847	7.44556	0.550762
chr10	66558559	66560416	merged_common_peak	131	142	-0.331744	6.994	0.967376
chr10	66568475	66568865	unique_peak1	44	38	0.0618792	5.31634	0.325774
chr10	66594503	66594732	unique_peak1	7	5	0.385537	2.77773	1.10484
chr10	66648128	66649017	merged_common_peak	68	47	0.350513	5.76022	0.696223
chr10	66674796	66675192	unique_peak1	41	23	0.66738	4.91865	1.11026
chr10	66745313	66749003	merged_common_peak	155	228	-0.781197	7.44861	5.79417
chr10	66750703	66751208	unique_peak1	71	33	0.906578	5.54075	2.49056
chr10	66753754	66754220	unique_peak1	51	27	0.738881	5.1768	1.48952
chr10	66762065	66762477	unique_peak1	27	16	0.60693	4.39093	0.823046
chr10	66998423	67000897	unique_peak2	89	120	-0.617761	6.60998	2.14853
chr10	67010711	67012735	unique_peak2	82	126	-0.799001	6.58918	3.40349
chr10	67247978	67249104	merged_common_peak	112	74	0.385448	6.42154	1.0306
chr10	67321538	67322137	unique_peak2	16	30	-0.946452	4.48097	1.24111
chr10	67325139	67325411	unique_peak1	13	12	0.0401318	3.72051	0.309718
chr10	67331050	67331384	unique_peak1	27	17	0.524468	4.43216	0.713115
chr10	67460795	67461200	unique_peak1	30	21	0.375021	4.64694	0.580177
chr10	67520070	67521404	merged_common_peak	237	106	0.897813	7.19037	6.55791
chr10	67598823	67600003	merged_common_peak	116	95	0.0771724	6.62355	0.34092
chr10	67681396	67681821	unique_peak1	57	28	0.838521	5.27724	1.88883
chr10	67681976	67682368	unique_peak1	39	13	1.37785	4.49628	2.74005
chr10	67703840	67704296	unique_peak1	38	30	0.196168	5.05228	0.419638
chr10	67710226	67710633	unique_peak1	37	14	1.20773	4.51076	2.32007
chr10	67726296	67726901	unique_peak1	77	35	0.93426	5.63706	2.75965
chr10	67739903	67740271	unique_peak1	41	28	0.394361	5.05516	0.631312
chr10	67745281	67746652	merged_common_peak	86	94	-0.315404	6.41215	0.715664
chr10	67783211	67783639	unique_peak1	48	21	1.00503	4.96195	2.10713
chr10	67814598	67814882	unique_peak1	25	7	1.59241	3.79621	2.4415
chr10	67859510	67859880	unique_peak1	19	7	1.23138	3.61569	1.55051
chr10	67897609	67899471	merged_common_peak	140	106	0.177424	6.83018	0.516421
chr10	67907057	67907503	unique_peak1	58	36	0.510572	5.46474	1.0105
chr10	67908459	67909899	merged_common_peak	132	101	0.166088	6.75547	0.471822
chr10	67919775	67920157	unique_peak1	44	15	1.34728	4.67364	3.02569
chr10	67922255	67923358	merged_common_peak	58	58	-0.162618	5.80133	0.349954
chr10	67984815	67985289	unique_peak1	47	31	0.436091	5.21805	0.725459
chr10	67990841	67993244	unique_peak2	110	139	-0.53959	6.85949	2.01923
chr10	67995882	67996470	unique_peak1	118	15	2.68546	5.34273	16.3041
chr10	68003527	68005039	merged_common_peak	125	104	0.0498674	6.73918	0.326519
chr10	68200108	68200517	unique_peak1	39	14	1.27831	4.54605	2.47671
chr10	68201738	68202108	unique_peak1	24	18	0.290517	4.39319	0.433767
chr10	68356385	68356814	unique_peak1	43	24	0.672501	4.98011	1.1789
chr10	68464278	68464784	unique_peak1	73	21	1.57231	5.24559	5.42872
chr10	68567097	68567680	unique_peak1	37	22	0.591058	4.81909	0.950554
chr10	68570061	68570346	unique_peak1	17	3	2.0864	3.0432	2.65003
chr10	68613640	68614545	merged_common_peak	207	109	0.672518	7.11762	3.66229
[truncated: 20,202 more rows]

## Sheet: 8B_FoxA2_ChIP-seq
Supplementary File 8B - MAnorm comparative analysis of FoxA2 ChIP-seq peaks between male and female mouse liver. Raw data from (Li et al., 2012) was processed and reanalyzed with MAnorm to identify sex-specific FoxA2 binding sites in mouse liver. FoxA2 ChIP-seq samples in male and female liver were defined as sample 1 and sample 2 respectively. Shown is the MAnorm output which lists the peak coor…
chr	start	end	description	raw_reads_1	raw_reads_2	M_value_rescaled	A_value_rescaled	-log10p-value
chr1	3406211	3406606	unique_peak2	31	55	-0.876567	5.36907	1.7749
chr1	3467784	3468083	unique_peak2	10	24	-1.422	3.93286	1.83731
chr1	3504557	3505484	merged_common_peak	325	397	0.00886518	8.64106	0.303482
chr1	4651634	4652354	merged_common_peak	557	261	1.4722	8.76952	49.9775
chr1	4661210	4661776	unique_peak1	87	42	1.12345	5.98799	4.73031
chr1	4758896	4759464	merged_common_peak	184	239	-0.168073	7.82285	0.600778
chr1	4791511	4792678	merged_common_peak	203	226	0.0687271	7.86091	0.368428
chr1	4800631	4801054	unique_peak2	45	54	-0.269791	5.64646	0.440153
chr1	4867680	4868078	unique_peak1	62	26	1.25998	5.38488	4.05067
chr1	5061941	5063145	unique_peak1	168	73	1.3846	6.90175	12.4916
chr1	6204009	6204874	merged_common_peak	133	137	0.11415	7.1656	0.410395
chr1	6500908	6501398	unique_peak1	71	29	1.32168	5.56773	4.87582
chr1	7078338	7079684	unique_peak2	119	146	-0.153595	7.12287	0.454191
chr1	7079776	7080203	merged_common_peak	104	85	0.406114	6.62932	1.222
chr1	7086804	7087140	merged_common_peak	28	30	-0.180948	4.86372	0.335332
chr1	7094268	7094713	unique_peak1	59	27	1.12944	5.37207	3.22914
chr1	7386962	7387604	unique_peak1	67	48	0.522387	5.8759	1.19693
chr1	8407086	8407397	merged_common_peak	63	40	0.682523	5.69881	1.70009
chr1	8861591	8861804	unique_peak1	4	4	-0.361892	2.14098	0.864172
chr1	8862805	8863323	merged_common_peak	91	92	0.0816972	6.58001	0.342181
chr1	9540593	9540899	merged_common_peak	39	34	0.158616	5.20859	0.375454
chr1	9554022	9554953	merged_common_peak	161	124	0.56057	7.24607	2.85542
chr1	9555145	9555713	merged_common_peak	146	103	0.670417	7.03565	3.53491
chr1	9574705	9575227	merged_common_peak	184	255	-0.261183	7.86941	1.08033
chr1	9611428	9612107	merged_common_peak	326	420	-0.067285	8.68403	0.386628
chr1	9621012	9622094	merged_common_peak	341	401	0.0711169	8.68661	0.4174
chr1	9628662	9629551	unique_peak2	76	104	-0.378227	6.52513	0.923563
chr1	9648410	9648846	unique_peak1	69	25	1.48305	5.44196	5.63288
chr1	9686903	9687226	unique_peak2	32	31	-0.0199662	4.99002	0.304477
chr1	9737433	9738134	merged_common_peak	129	163	-0.183377	7.26586	0.556536
chr1	9762889	9763496	merged_common_peak	92	98	0.00880074	6.63376	0.305417
chr1	9812923	9813258	merged_common_peak	53	50	0.0957498	5.7203	0.334446
chr1	9838042	9839047	merged_common_peak	97	102	0.0354646	6.70423	0.317735
chr1	9897022	9897525	merged_common_peak	112	153	-0.316897	7.10834	0.961521
chr1	9937553	9938212	merged_common_peak	93	93	0.100685	6.60493	0.372687
chr1	9961313	9961636	merged_common_peak	32	42	-0.446231	5.20315	0.595372
chr1	9978467	9979343	merged_common_peak	147	155	0.0963044	7.33355	0.398162
chr1	10202216	10202701	unique_peak1	72	42	0.824381	5.83846	2.4588
chr1	10310252	10310695	merged_common_peak	91	65	0.576462	6.33263	1.76186
chr1	12634737	12634977	unique_peak2	1	4	-1.82829	1.40778	1.10721
chr1	13124449	13124692	unique_peak2	10	9	-0.100073	3.27189	1.03275
chr1	13161202	13161566	merged_common_peak	42	37	0.155711	5.32578	0.369793
chr1	13231393	13231798	merged_common_peak	159	178	0.0226577	7.49514	0.310681
chr1	13291440	13292095	unique_peak2	57	83	-0.509782	6.13743	1.18609
chr1	13302618	13303033	merged_common_peak	61	51	0.288826	5.84485	0.620825
chr1	13313194	13313762	merged_common_peak	119	95	0.461115	6.81552	1.61647
chr1	13363943	13364809	merged_common_peak	307	396	-0.0784022	8.59379	0.413554
chr1	13457194	13457683	unique_peak2	41	63	-0.634019	5.68299	1.31927
chr1	13553553	13553984	merged_common_peak	83	63	0.475268	6.23763	1.27153
chr1	13566473	13567133	merged_common_peak	160	250	-0.455099	7.74399	2.56131
chr1	13618382	13619089	merged_common_peak	101	73	0.576535	6.49772	1.93673
chr1	13636232	13636947	unique_peak1	83	69	0.345985	6.30228	0.852247
chr1	13646145	13646647	merged_common_peak	100	102	0.0837205	6.72836	0.351467
chr1	13667714	13668223	merged_common_peak	99	118	-0.140521	6.82456	0.397144
chr1	13689666	13690031	unique_peak2	59	69	-0.192493	6.03304	0.408001
chr1	15108673	15109015	unique_peak1	28	15	0.773248	4.38662	1.05601
chr1	15598117	15598795	merged_common_peak	130	264	-0.86341	7.61814	7.7809
chr1	15605687	15606011	unique_peak2	21	28	-0.526839	4.59456	0.591915
chr1	15795763	15796859	merged_common_peak	98	116	-0.132152	6.80429	0.379926
chr1	15807017	15807452	merged_common_peak	80	65	0.372672	6.23073	0.881817
chr1	15823467	15823999	unique_peak1	72	29	1.34375	5.57877	5.03568
chr1	15986767	15987607	merged_common_peak	90	97	-0.0113444	6.60904	0.30103
chr1	16101929	16102285	unique_peak2	42	39	0.0817099	5.36278	0.325163
chr1	16189254	16189878	merged_common_peak	353	477	-0.123508	8.83911	0.643443
chr1	16218046	16218881	merged_common_peak	94	111	-0.135146	6.73978	0.383632
chr1	16299159	16299467	unique_peak1	40	34	0.198133	5.22835	0.406785
chr1	16300095	16300467	merged_common_peak	52	54	-0.0430988	5.75981	0.303059
chr1	16597540	16597933	unique_peak1	56	40	0.49715	5.60613	1.02304
chr1	16647205	16647803	unique_peak2	65	87	-0.37011	6.27438	0.808047
chr1	19169050	19169458	merged_common_peak	105	117	-0.0350948	6.8651	0.304774
chr1	20059778	20060218	unique_peak1	40	31	0.327416	5.16371	0.549429
chr1	20121946	20122832	merged_common_peak	219	254	0.0217617	8.00523	0.311612
chr1	20460918	20461251	unique_peak2	20	32	-0.787701	4.65054	1.0286
chr1	20930129	20930511	unique_peak1	42	32	0.359244	5.22402	0.595372
chr1	21028006	21028309	unique_peak2	33	26	0.272922	4.89135	0.481798
chr1	21042650	21043031	unique_peak2	44	78	-0.827386	5.89009	2.24733
chr1	21049462	21050233	merged_common_peak	124	156	-0.183213	7.20301	0.540485
chr1	21059880	21060353	merged_common_peak	94	95	0.0872464	6.62859	0.355053
chr1	21070341	21070914	merged_common_peak	217	386	-0.59469	8.29884	6.05693
chr1	21115073	21115512	merged_common_peak	53	60	-0.162562	5.84946	0.369635
chr1	21122373	21122893	merged_common_peak	383	389	0.300211	8.75744	2.3741
chr1	21210758	21211556	merged_common_peak	146	181	-0.136938	7.43933	0.441875
chr1	21221657	21222467	merged_common_peak	408	530	-0.0440874	9.03052	0.347786
chr1	21222594	21223184	merged_common_peak	375	435	0.105664	8.82102	0.578775
chr1	21230158	21230880	unique_peak2	98	98	0.108856	6.68378	0.386857
chr1	21236075	21237074	merged_common_peak	278	343	-0.0299285	8.4113	0.312526
chr1	21258616	21259246	unique_peak2	63	83	-0.352242	6.2162	0.723127
chr1	21314060	21314720	merged_common_peak	198	130	0.822139	7.44449	6.62723
chr1	21316689	21317599	merged_common_peak	303	166	1.14997	7.95869	17.7336
chr1	21819908	21820293	unique_peak2	30	41	-0.512339	5.13615	0.749947
chr1	22106548	22107654	merged_common_peak	210	264	-0.10058	7.99956	0.423862
chr1	22594688	22595216	merged_common_peak	131	107	0.443721	6.97675	1.6746
chr1	22601707	22602106	unique_peak1	47	17	1.40975	4.8748	3.64582
chr1	22627632	22628118	merged_common_peak	194	287	-0.346858	7.9965	1.87982
chr1	22640729	22641058	merged_common_peak	53	30	0.813979	5.36119	1.81099
chr1	22652123	22652522	merged_common_peak	53	63	-0.231825	5.88409	0.451511
chr1	22679393	22679687	unique_peak1	22	12	0.701841	4.05136	0.84084
chr1	23003426	23003936	unique_peak1	58	30	0.955696	5.43204	2.51462
chr1	23127690	23128096	merged_common_peak	65	126	-0.899364	6.539	4.12461
chr1	23170197	23170825	merged_common_peak	225	204	0.379697	7.86933	2.13637
chr1	23180320	23180541	unique_peak2	7	3	0.712213	2.35611	1.23215
chr1	23189427	23189894	unique_peak1	52	26	0.983373	5.24657	2.34579
chr1	23194331	23194615	unique_peak2	28	47	-0.811714	5.17911	1.48952
chr1	23260980	23261549	merged_common_peak	137	147	0.0602941	7.2396	0.336383
chr1	23386361	23386719	unique_peak2	25	65	-1.4459	5.32144	4.56143
chr1	23487691	23488164	unique_peak2	52	48	0.123551	5.67649	0.354801
chr1	23491446	23491942	unique_peak1	75	37	1.06717	5.78151	3.81446
chr1	23712139	23712492	unique_peak1	42	11	1.81868	4.4943	4.50079
chr1	24618323	24623114	merged_common_peak	18970	22310	0.70353	14.7972	Inf
chr1	24684970	24685790	unique_peak1	85	68	0.404401	6.31072	1.02603
chr1	24740761	24741249	merged_common_peak	53	51	0.0677354	5.73431	0.319645
chr1	24800038	24800717	unique_peak1	84	56	0.661317	6.16355	2.03625
chr1	27940579	27941005	merged_common_peak	141	160	-0.0154416	7.3232	0.301711
chr1	28859678	28859902	unique_peak1	7	0	2.71221	1.35611	2.40824
chr1	30867436	30867826	merged_common_peak	60	50	0.290818	5.81783	0.580756
chr1	30930357	30931164	merged_common_peak	262	408	-0.374135	8.48889	2.84649
chr1	30931368	30931773	unique_peak2	57	81	-0.475017	6.12004	1.05486
chr1	30977616	30978101	merged_common_peak	60	56	0.130353	5.89807	0.367307
chr1	30994119	30994625	unique_peak1	81	80	0.0968532	6.38828	0.364763
chr1	30998018	30998403	merged_common_peak	52	102	-0.94824	6.21238	3.7231
chr1	31006492	31007870	merged_common_peak	241	276	0.0549039	8.14119	0.356476
chr1	31072021	31072448	merged_common_peak	371	420	0.139056	8.7872	0.776789
chr1	31076063	31076662	unique_peak2	152	170	0.0170272	7.42637	0.306728
chr1	31090337	31091287	merged_common_peak	515	682	-0.0353501	9.39807	0.34227
chr1	31129363	31130446	merged_common_peak	162	220	-0.2517	7.66205	0.920036
chr1	31151355	31153659	merged_common_peak	384	466	0.044425	8.88949	0.359672
chr1	33079844	33080138	unique_peak1	28	28	-0.084733	4.81561	0.304978
chr1	33098949	33099688	unique_peak1	103	48	1.20235	6.21589	6.16534
chr1	33153717	33154126	unique_peak1	72	21	1.79121	5.35504	7.49252
chr1	33270678	33271707	unique_peak1	318	70	2.461	7.38025	53.8077
chr1	33741310	33741715	merged_common_peak	113	138	-0.154951	7.04147	0.440623
chr1	33996673	33997064	unique_peak2	30	62	-1.0973	5.42863	2.95982
chr1	34004892	34005131	unique_peak2	8	17	-1.26922	3.53532	1.234
chr1	34052929	34053354	merged_common_peak	63	64	0.0177075	6.03122	0.307712
chr1	34062574	34062907	merged_common_peak	42	37	0.155711	5.32578	0.369793
chr1	34160270	34160933	merged_common_peak	104	76	0.565592	6.54958	1.96253
chr1	34177830	34178239	unique_peak2	68	78	-0.143321	6.23212	0.353159
chr1	34179672	34180650	merged_common_peak	146	81	1.0133	6.8642	6.78452
chr1	34294087	34295127	merged_common_peak	128	192	-0.43064	7.37714	1.86296
chr1	34309058	34309633	merged_common_peak	118	81	0.675133	6.69512	2.88601
chr1	34444197	34445200	merged_common_peak	707	556	0.765113	9.50409	22.6448
chr1	34456450	34456902	merged_common_peak	183	107	0.975256	7.24252	7.94764
chr1	34472346	34472805	unique_peak1	51	25	1.00734	5.20411	2.40123
chr1	34491492	34491972	unique_peak2	40	66	-0.738673	5.69675	1.70009
chr1	35778876	35779300	merged_common_peak	75	70	0.165351	6.23242	0.445902
chr1	35820963	35821346	unique_peak2	42	44	-0.0882151	5.44775	0.311131
chr1	35837178	35837653	merged_common_peak	90	45	1.0798	6.06346	4.53377
chr1	35893320	35893846	merged_common_peak	388	483	0.00938191	8.92355	0.304612
chr1	35983007	35983383	unique_peak2	28	54	-1.00811	5.2773	2.29326
chr1	35983575	35984055	merged_common_peak	77	98	-0.272688	6.49301	0.61027
chr1	36122866	36123590	merged_common_peak	241	319	-0.153282	8.24529	0.644966
chr1	36129627	36130837	unique_peak2	222	292	-0.156966	8.11627	0.630226
chr1	36131690	36133164	merged_common_peak	375	457	0.0346447	8.85653	0.334799
chr1	36311890	36312357	merged_common_peak	137	214	-0.478445	7.50897	2.43481
chr1	36373775	36374086	unique_peak2	26	31	-0.341112	4.82944	0.440893
chr1	36389932	36390443	unique_peak1	65	45	0.565759	5.80644	1.32472
chr1	36413700	36414238	merged_common_peak	106	127	-0.137425	6.93129	0.409194
chr1	36522508	36523132	merged_common_peak	153	132	0.390023	7.25029	1.55678
chr1	36526487	36527531	merged_common_peak	268	291	0.148098	8.26387	0.685724
chr1	36568083	36569067	merged_common_peak	230	319	-0.227731	8.20806	1.07797
chr1	36582583	36583067	merged_common_peak	87	64	0.527349	6.28604	1.54549
chr1	36593043	36593631	merged_common_peak	121	102	0.38603	6.87952	1.30206
chr1	36751665	36752129	merged_common_peak	75	106	-0.426369	6.52828	1.09282
chr1	36837258	36838154	merged_common_peak	166	180	0.0751551	7.53742	0.371862
chr1	36839188	36839764	merged_common_peak	176	180	0.168226	7.58396	0.601135
chr1	36864486	36865015	merged_common_peak	179	258	-0.321839	7.85589	1.5181
chr1	36918517	36918975	unique_peak2	47	56	-0.253211	5.70628	0.434791
chr1	36976887	36977291	merged_common_peak	79	84	-0.0122049	6.40329	0.30103
chr1	37033469	37034195	merged_common_peak	233	265	0.0595648	8.08506	0.358727
chr1	37082705	37083653	merged_common_peak	622	756	0.117814	9.62306	0.882962
chr1	37097899	37098480	merged_common_peak	384	519	-0.110664	8.96704	0.598075
chr1	37113551	37114758	merged_common_peak	508	833	-0.345371	9.53122	4.88069
chr1	37366314	37366704	unique_peak1	76	34	1.20674	5.73265	4.5968
chr1	37398173	37399245	merged_common_peak	458	438	0.414982	8.98557	4.90378
chr1	37404098	37404623	unique_peak2	70	119	-0.700703	6.55654	2.60049
chr1	37407652	37408579	merged_common_peak	230	282	-0.0504611	8.11943	0.332723
chr1	37486467	37487255	merged_common_peak	145	195	-0.254777	7.48732	0.883032
chr1	37625156	37625675	merged_common_peak	112	79	0.627961	6.63591	2.48525
chr1	37687224	37687730	merged_common_peak	87	55	0.742362	6.17854	2.54371
chr1	37947002	37947617	merged_common_peak	80	78	0.113286	6.36042	0.366327
chr1	38044724	38045180	merged_common_peak	64	82	-0.310152	6.21996	0.629493
chr1	38063572	38064039	unique_peak2	47	59	-0.327211	5.74329	0.547023
chr1	38115440	38115694	unique_peak2	11	13	-0.44625	3.58423	0.386243
chr1	38166651	38167121	merged_common_peak	143	139	0.208575	7.23357	0.683033
chr1	38175514	38175919	merged_common_peak	249	327	-0.136857	8.28912	0.593328
chr1	38297783	38299192	merged_common_peak	340	332	0.338104	8.54843	2.59061
chr1	38299305	38300053	merged_common_peak	134	244	-0.702065	7.58561	5.10066
chr1	38364977	38365998	merged_common_peak	461	609	-0.0491809	9.22807	0.366412
chr1	38506217	38506938	merged_common_peak	128	65	1.11742	6.60311	6.81052
chr1	38921216	38921613	unique_peak1	52	16	1.6508	4.91286	4.84405
chr1	39043901	39044685	merged_common_peak	97	157	-0.581816	7.01287	2.46222
chr1	39119419	39119727	unique_peak2	29	37	-0.420425	5.03772	0.5725
chr1	39124640	39125156	merged_common_peak	143	107	0.582971	7.04637	2.76023
chr1	39162155	39162947	merged_common_peak	169	186	0.0566004	7.57519	0.337605
chr1	39243835	39244305	unique_peak1	68	49	0.516604	5.90216	1.25618
chr1	39424397	39425063	merged_common_peak	84	82	0.119168	6.43462	0.381858
chr1	39481936	39482981	merged_common_peak	171	229	-0.223277	7.73385	0.823491
chr1	39490663	39491145	unique_peak2	55	89	-0.665477	6.15911	1.83647
chr1	39491594	39492143	merged_common_peak	132	164	-0.155635	7.2885	0.47928
chr1	39502096	39503059	merged_common_peak	171	205	-0.0642877	7.65436	0.335603
chr1	39514551	39515774	merged_common_peak	244	302	-0.0548107	8.21577	0.337588
chr1	39571945	39572539	merged_common_peak	73	91	-0.251143	6.39799	0.554662
chr1	39632309	39632712	unique_peak2	75	86	-0.127845	6.37902	0.348132
chr1	39633805	39634783	merged_common_peak	209	238	0.0407994	7.92127	0.329745
chr1	39635129	39635750	merged_common_peak	156	151	0.228254	7.36205	0.782728
chr1	39648844	39649419	merged_common_peak	242	295	-0.0342078	8.19235	0.314416
chr1	39668796	39669717	merged_common_peak	128	133	0.0957277	7.11395	0.379724
chr1	39869932	39870400	merged_common_peak	72	93	-0.303944	6.40262	0.672993
chr1	39959527	39960283	merged_common_peak	90	110	-0.19105	6.69889	0.478431
chr1	40173283	40173598	unique_peak2	31	28	0.0728069	4.89438	0.334168
chr1	40212803	40213520	merged_common_peak	663	769	0.195249	9.68634	1.98178
chr1	40213884	40214373	unique_peak1	175	141	0.509257	7.40438	2.66931
chr1	40221109	40221706	merged_common_peak	464	637	-0.10357	9.26563	0.627258
chr1	40232488	40233103	merged_common_peak	393	407	0.276259	8.81055	2.12806
chr1	40281620	40282427	merged_common_peak	183	250	-0.2414	7.85084	0.9805
chr1	40286534	40287122	unique_peak2	145	188	-0.20231	7.46109	0.656638
chr1	40340544	40340922	unique_peak2	28	52	-0.954672	5.25058	2.04885
chr1	40444847	40445276	unique_peak1	56	45	0.33114	5.68913	0.658272
chr1	40859652	40859981	unique_peak1	31	26	0.1759	4.84284	0.396393
chr1	41600371	41600963	unique_peak1	51	31	0.707777	5.35389	1.46742
chr1	41612399	41613213	merged_common_peak	151	200	-0.226666	7.53772	0.759107
chr1	41615953	41616596	merged_common_peak	156	148	0.257013	7.34768	0.901365
chr1	42589630	42590093	merged_common_peak	106	109	0.0812156	6.82197	0.348327
chr1	43330042	43330539	unique_peak1	61	25	1.28883	5.34485	4.14101
chr1	43361975	43362615	merged_common_peak	749	1050	-0.0586731	10.0082	0.478324
chr1	43455791	43456119	unique_peak2	41	28	0.508	5.11198	0.836075
chr1	43541938	43542492	unique_peak2	48	75	-0.63525	5.9303	1.49366
chr1	43591092	43591688	merged_common_peak	164	140	0.416168	7.34764	1.83185
chr1	43990216	43990988	merged_common_peak	227	250	0.101734	8.02241	0.452105
chr1	43992138	43993231	unique_peak1	177	102	0.990587	7.18179	7.95252
chr1	44072458	44072876	unique_peak1	45	19	1.18964	4.91675	2.81179
chr1	44208795	44208937	unique_peak2	3	1	0.602926	1.30146	0.90309
chr1	45488864	45489332	unique_peak1	60	30	1.00905	5.45872	2.76923
chr1	45873743	45874201	merged_common_peak	101	118	-0.10883	6.8404	0.361996
chr1	45954663	45955274	merged_common_peak	64	67	-0.0225752	6.07618	0.30103
chr1	45961856	45962541	merged_common_peak	103	94	0.247209	6.69346	0.68026
chr1	45977372	45978022	merged_common_peak	137	138	0.150806	7.19434	0.491501
chr1	45981260	45983137	merged_common_peak	431	635	-0.216846	9.20446	1.72501
chr1	45988008	45988374	merged_common_peak	37	67	-0.881652	5.64664	2.20716
chr1	46132791	46133035	unique_peak2	6	4	0.176586	2.41022	0.989111
chr1	46910023	46911098	merged_common_peak	190	250	-0.181646	7.88072	0.689005
chr1	49627778	49628223	unique_peak1	46	14	1.6391	4.72644	4.39313
chr1	49629441	49629751	merged_common_peak	32	23	0.395071	4.7825	0.622271
chr1	50739654	50740283	merged_common_peak	184	179	0.246964	7.61534	0.978786
chr1	51322082	51322422	unique_peak2	27	40	-0.640463	5.03732	0.950817
chr1	51349214	51349566	unique_peak2	27	71	-1.45284	5.44351	5.01273
chr1	51534980	51535726	merged_common_peak	91	91	0.097294	6.57221	0.35734
chr1	51565323	51565725	unique_peak1	72	42	0.824381	5.83846	2.4588
chr1	51623898	51624368	merged_common_peak	145	197	-0.269424	7.49464	0.956996
chr1	51785659	51786065	unique_peak2	47	81	-0.777873	5.96862	2.15469
chr1	51816311	51817129	merged_common_peak	261	359	-0.196127	8.39379	0.954895
chr1	51826409	51827666	merged_common_peak	314	380	0.0169106	8.5821	0.308126
chr1	51912811	51914273	merged_common_peak	191	218	0.0234671	7.78652	0.31334
chr1	51939136	51940539	merged_common_peak	260	268	0.218143	8.18053	1.05863
chr1	51948681	51949324	merged_common_peak	300	318	0.200389	8.41761	1.06281
chr1	51961633	51962273	merged_common_peak	98	72	0.548388	6.46402	1.79671
chr1	52053468	52053931	merged_common_peak	186	238	-0.144841	7.82845	0.532617
chr1	52097267	52097835	merged_common_peak	110	44	1.42946	6.20658	8.41508
chr1	52175907	52176478	merged_common_peak	79	97	-0.217524	6.50595	0.503955
chr1	52220467	52220954	merged_common_peak	78	53	0.622168	6.06597	1.74992
chr1	52443812	52444314	merged_common_peak	57	87	-0.576896	6.17098	1.47434
chr1	52484902	52485353	merged_common_peak	70	94	-0.363668	6.38802	0.819275
chr1	52522330	52523147	merged_common_peak	125	133	0.0580704	7.09512	0.340009
chr1	52531077	52531483	merged_common_peak	127	149	-0.079456	7.18909	0.337598
chr1	52563731	52564089	unique_peak2	23	39	-0.851536	4.89616	1.34356
chr1	52806779	52807259	unique_peak2	48	56	-0.220212	5.72278	0.402441
chr1	52822624	52823036	merged_common_peak	60	98	-0.666114	6.2963	2.07507
chr1	52873546	52874076	unique_peak2	23	40	-0.88716	4.91397	1.4523
chr1	52906104	52907046	merged_common_peak	288	309	0.176569	8.36441	0.855295
chr1	53115901	53116473	merged_common_peak	92	117	-0.244486	6.7604	0.590523
chr1	53127340	53127924	merged_common_peak	60	67	-0.12422	6.02535	0.343123
chr1	53348039	53348540	merged_common_peak	275	266	0.318339	8.21987	1.93178
chr1	53840965	53841446	merged_common_peak	105	119	-0.0593423	6.87722	0.315878
chr1	54599681	54600197	merged_common_peak	98	66	0.672123	6.40215	2.43121
chr1	54609494	54609840	unique_peak2	43	47	-0.144533	5.5127	0.339647
chr1	54671866	54672324	unique_peak1	40	26	0.572528	5.04115	0.950817
chr1	54872166	54872735	merged_common_peak	90	124	-0.362419	6.78457	1.01911
chr1	54886916	54887336	unique_peak2	65	71	-0.0806039	6.12962	0.315091
chr1	54906754	54907384	merged_common_peak	104	147	-0.377075	7.02092	1.20949
chr1	55083327	55084665	unique_peak2	131	157	-0.105172	7.25119	0.372473
chr1	55108936	55109952	merged_common_peak	153	165	0.0702662	7.41017	0.352921
chr1	55187588	55188849	merged_common_peak	142	160	-0.00421094	7.32881	0.301706
chr1	55228198	55229110	merged_common_peak	144	157	0.0451528	7.32636	0.32546
chr1	55293875	55294604	merged_common_peak	72	78	-0.0531355	6.27721	0.30667
chr1	55792980	55793508	merged_common_peak	303	307	0.266886	8.40023	1.61484
chr1	56351303	56351711	merged_common_peak	73	100	-0.385792	6.46532	0.951857
chr1	56596398	56597427	merged_common_peak	128	90	0.654022	6.83481	2.94197
chr1	56839056	56839261	unique_peak2	4	2	0.375074	1.7725	0.931119
chr1	57321280	57321661	unique_peak1	47	29	0.672789	5.24329	1.32968
chr1	57326421	57326770	unique_peak2	35	32	0.0748895	5.08184	0.330209
chr1	57398009	57398568	merged_common_peak	264	170	0.896094	7.8659	10.2029
chr1	57425185	57425637	unique_peak2	50	68	-0.431824	5.89261	0.830196
chr1	57445651	57446096	unique_peak2	72	99	-0.393211	6.44725	0.959338
chr1	57447879	57448649	merged_common_peak	102	93	0.247013	6.6781	0.68397
chr1	58086280	58086998	merged_common_peak	266	376	-0.232441	8.4422	1.24444
chr1	58087246	58087811	merged_common_peak	221	224	0.216817	7.92219	0.914563
chr1	58128151	58129073	unique_peak1	112	58	1.06725	6.41627	5.61861
chr1	58134530	58135098	unique_peak1	85	56	0.680035	6.17291	2.12809
chr1	58135147	58135658	merged_common_peak	109	90	0.399033	6.70731	1.23485
chr1	58149349	58149824	merged_common_peak	93	78	0.351493	6.47953	0.944544
chr1	58158266	58158960	merged_common_peak	176	179	0.176219	7.57996	0.628672
chr1	58170348	58171354	merged_common_peak	163	146	0.346318	7.37283	1.39999
chr1	58200944	58201852	merged_common_peak	603	698	0.183248	9.54077	1.64326
chr1	58410236	58410795	unique_peak1	65	56	0.256431	5.96111	0.553596
chr1	58458198	58458731	merged_common_peak	191	282	-0.346404	7.97146	1.80126
chr1	58479725	58480498	merged_common_peak	133	213	-0.518792	7.48207	2.771
chr1	58661598	58662027	unique_peak2	49	76	-0.621777	5.9559	1.47445
chr1	58667097	58667990	merged_common_peak	267	328	-0.0299818	8.34695	0.313057
chr1	58672396	58673021	unique_peak2	101	101	0.113563	6.72921	0.384415
chr1	58769088	58769909	merged_common_peak	128	166	-0.221887	7.27276	0.673124
chr1	58885610	58886036	merged_common_peak	57	135	-1.20493	6.485	6.94264
chr1	59029759	59031420	merged_common_peak	207	208	0.218992	7.81686	0.891436
chr1	59127766	59128079	unique_peak2	29	37	-0.420425	5.03772	0.5725
chr1	59158902	59159386	unique_peak2	40	54	-0.453944	5.55439	0.755494
chr1	59209117	59209541	unique_peak1	50	39	0.354773	5.49931	0.649502
chr1	59231364	59232263	merged_common_peak	264	316	0.0056074	8.31114	0.3024
chr1	59257755	59259793	merged_common_peak	474	490	0.308315	9.09374	3.06005
chr1	59265297	59265949	unique_peak2	75	93	-0.239491	6.43484	0.513357
chr1	59293607	59295296	merged_common_peak	186	248	-0.203976	7.85801	0.780632
chr1	59378303	59379599	merged_common_peak	207	232	0.0621655	7.89527	0.35635
chr1	59418625	59419223	unique_peak2	47	98	-1.04968	6.10452	4.09563
chr1	59452949	59453646	unique_peak1	85	54	0.731566	6.14714	2.37405
chr1	59470054	59470578	unique_peak1	69	56	0.350597	6.00819	0.788925
chr1	59479754	59480241	merged_common_peak	82	119	-0.450789	6.6815	1.31294
chr1	59487076	59487414	merged_common_peak	45	41	0.119251	5.45194	0.363463
chr1	59538472	59539254	unique_peak2	68	128	-0.850767	6.58584	3.75185
chr1	59555012	59555526	merged_common_peak	143	150	0.0994536	7.28813	0.401277
chr1	59560431	59561132	merged_common_peak	776	1306	-0.316569	10.1938	6.40335
chr1	59828682	59829105	merged_common_peak	147	255	-0.618293	7.69085	4.31523
chr1	59861149	59861472	unique_peak2	40	32	0.283022	5.1859	0.494449
chr1	60154611	60155269	unique_peak2	69	80	-0.156363	6.26167	0.370598
chr1	60203834	60204085	unique_peak1	18	20	-0.295794	4.24442	0.353908
chr1	60237666	60238132	unique_peak2	51	66	-0.358312	5.88693	0.662566
chr1	60326222	60326622	merged_common_peak	29	46	-0.727086	5.19105	1.26139
chr1	60350768	60351374	merged_common_peak	68	74	-0.0683586	6.19464	0.306979
chr1	60620730	60621297	merged_common_peak	469	435	0.462775	8.99957	6.10178
chr1	60652815	60653626	merged_common_peak	221	243	0.0998608	7.98067	0.440654
chr1	60655673	60656590	merged_common_peak	226	439	-0.715117	8.4238	9.37176
chr1	60716347	60717122	merged_common_peak	251	268	0.161985	8.15245	0.716858
chr1	60719066	60719860	merged_common_peak	346	426	0.00730407	8.74174	0.303316
chr1	60724720	60725609	merged_common_peak	113	136	-0.134042	7.03101	0.40173
chr1	60725861	60726281	merged_common_peak	63	79	-0.281853	6.181	0.554459
chr1	60881413	60882141	merged_common_peak	195	164	0.46493	7.59879	2.58019
chr1	60903484	60904031	merged_common_peak	77	124	-0.609116	6.66123	2.17359
chr1	60916163	60917309	merged_common_peak	427	537	0.00968767	9.07631	0.306061
chr1	61204342	61204606	unique_peak2	7	17	-1.45771	3.44107	1.234
chr1	61357231	61357773	merged_common_peak	304	475	-0.355889	8.71687	3.02763
chr1	61433125	61433481	merged_common_peak	46	83	-0.846331	5.96915	2.49437
chr1	61667244	61667535	unique_peak1	22	9	1.08035	3.8621	1.37308
chr1	61696395	61696894	unique_peak1	87	12	2.84928	5.12508	15.952
chr1	61826522	61826876	merged_common_peak	63	65	-0.00431882	6.04223	0.302688
chr1	61893124	61893628	merged_common_peak	402	434	0.219958	8.87485	1.532
chr1	62099428	62100121	merged_common_peak	95	71	0.519042	6.42945	1.58626
chr1	62221609	62222328	merged_common_peak	114	147	-0.231487	7.09371	0.652153
chr1	62380765	62381180	merged_common_peak	216	246	0.0457746	7.97125	0.33614
chr1	62471756	62472002	unique_peak2	17	13	0.202641	3.90868	0.368541
chr1	62512856	62513273	merged_common_peak	64	64	0.0425198	6.04363	0.31595
chr1	62545741	62546591	merged_common_peak	122	94	0.515739	6.82773	1.97584
chr1	62764437	62764855	unique_peak2	24	55	-1.27163	5.17154	3.23768
chr1	62771369	62772208	unique_peak1	139	106	0.551308	7.01712	2.46222
chr1	62777061	62777504	merged_common_peak	164	187	0.00113044	7.55515	0.301609
chr1	62794391	62795374	merged_common_peak	145	204	-0.319547	7.51971	1.24702
chr1	62798168	62798663	merged_common_peak	120	162	-0.289369	7.20404	0.921085
chr1	62824024	62824587	unique_peak2	57	75	-0.365392	6.06523	0.71687
chr1	62870092	62870881	merged_common_peak	122	149	-0.143224	7.15721	0.429839
chr1	62945903	62946550	merged_common_peak	160	177	0.0407112	7.49609	0.322746
chr1	63128741	63129050	merged_common_peak	64	82	-0.310152	6.21996	0.629493
chr1	63185255	63185704	unique_peak1	76	36	1.12656	5.77274	4.15797
chr1	63222887	63223877	merged_common_peak	279	487	-0.528675	8.6664	6.17672
chr1	63238813	63239294	merged_common_peak	75	45	0.791536	5.91933	2.45779
chr1	63676222	63677537	unique_peak1	112	70	0.800142	6.54982	3.60847
chr1	63752414	63752650	unique_peak2	3	9	-1.719	2.46243	1.57097
chr1	64167768	64169351	merged_common_peak	370	473	-0.036319	8.87058	0.329132
chr1	64782666	64783171	merged_common_peak	124	94	0.541552	6.84063	2.12411
chr1	64784487	64785506	merged_common_peak	149	186	-0.143706	7.47504	0.477874
chr1	64799615	64800031	merged_common_peak	128	152	-0.0955709	7.2096	0.360663
chr1	64803857	64804308	merged_common_peak	214	286	-0.185583	8.07212	0.767925
chr1	64834086	64834680	merged_common_peak	148	134	0.315668	7.23465	1.13399
chr1	64839495	64839951	unique_peak2	102	96	0.201689	6.70076	0.568552
chr1	64841758	64842242	merged_common_peak	228	235	0.197638	7.98146	0.857672
chr1	64855630	64856120	merged_common_peak	81	137	-0.671821	6.77261	2.74509
chr1	65003143	65003526	merged_common_peak	47	51	-0.12076	5.64006	0.320774
chr1	65201379	65201717	unique_peak2	37	40	-0.151741	5.28168	0.326417
chr1	65223420	65226121	merged_common_peak	716	926	0.0504362	9.88164	0.434135
chr1	65359556	65359882	unique_peak1	21	30	-0.623054	4.64267	0.738267
chr1	65384321	65384809	merged_common_peak	125	53	1.36927	6.43952	9.1318
chr1	65430283	65430679	merged_common_peak	38	54	-0.533979	5.51437	0.908349
chr1	65887705	65888013	unique_peak1	20	22	-0.266869	4.39013	0.348739
chr1	66147894	66148485	merged_common_peak	150	166	0.0301178	7.39876	0.317139
chr1	66597400	66597789	merged_common_peak	122	143	-0.0843303	7.12776	0.339171
chr1	66824503	66824867	merged_common_peak	86	134	-0.545389	6.80412	1.91793
chr1	66867838	66868494	unique_peak2	70	148	-1.01298	6.71268	5.76121
chr1	66947475	66948023	merged_common_peak	1698	2870	-0.199811	11.3874	5.84126
chr1	66969509	66969967	merged_common_peak	92	103	-0.0622824	6.6693	0.310658
chr1	67045138	67045918	merged_common_peak	323	442	-0.155522	8.7134	0.801732
chr1	67048473	67049237	merged_common_peak	200	214	0.123373	7.80988	0.494976
chr1	67107982	67108457	unique_peak2	52	58	-0.144382	5.81045	0.349954
chr1	67113932	67114410	unique_peak1	61	50	0.31684	5.83085	0.675315
chr1	67123922	67124849	merged_common_peak	722	1111	-0.198743	10.0196	2.40774
chr1	67138992	67139574	merged_common_peak	212	279	-0.164916	8.04682	0.646422
chr1	67149911	67150972	merged_common_peak	496	646	-0.0172706	9.32899	0.30931
chr1	67159835	67160372	merged_common_peak	200	270	-0.210583	7.97686	0.859884
chr1	67162751	67163723	merged_common_peak	402	565	-0.159829	9.06474	0.982784
chr1	67169130	67170727	merged_common_peak	261	426	-0.442366	8.51691	3.99615
chr1	67171956	67172513	unique_peak2	126	140	-0.00274061	7.13818	0.301803
chr1	68002466	68002906	merged_common_peak	127	139	0.0200797	7.13932	0.307985
chr1	68767274	68767560	unique_peak2	17	37	-1.23793	4.62896	2.15838
chr1	69020307	69020776	merged_common_peak	55	69	-0.302906	5.97783	0.549575
chr1	69025623	69026317	merged_common_peak	79	64	0.374818	6.20978	0.889714
chr1	69152306	69152932	merged_common_peak	108	127	-0.107788	6.94611	0.357534
chr1	69517382	69517733	unique_peak2	20	28	-0.601288	4.55734	0.677584
chr1	69900015	69900431	unique_peak1	68	22	1.6369	5.34201	6.38507
chr1	69940842	69941304	unique_peak1	73	16	2.18496	5.17994	9.75361
chr1	71277800	71278539	merged_common_peak	148	107	0.637596	7.07369	3.26381
chr1	71622326	71622983	unique_peak2	75	115	-0.542883	6.58654	1.67258
chr1	71626021	71626528	unique_peak1	74	78	-0.00987977	6.29884	0.30103
chr1	71680904	71681931	merged_common_peak	589	668	0.209003	9.49036	1.96388
chr1	71693358	71694268	merged_common_peak	165	164	0.199067	7.46586	0.68582
chr1	71770350	71770902	merged_common_peak	158	183	-0.0271222	7.51	0.303416
chr1	71854165	71854506	merged_common_peak	60	88	-0.51249	6.21949	1.2846
chr1	71883820	71884229	unique_peak2	53	69	-0.361108	5.94873	0.699241
chr1	71932795	71933906	merged_common_peak	295	402	-0.163642	8.57282	0.803972
chr1	71934119	71935417	merged_common_peak	208	226	0.107479	7.88029	0.467509
chr1	71958816	71959577	merged_common_peak	193	264	-0.23501	7.93234	0.977169
chr1	71983467	71984269	merged_common_peak	118	205	-0.653815	7.35959	3.86919
chr1	72011029	72011609	unique_peak1	81	45	0.913141	5.98013	3.25397
chr1	72059241	72059707	merged_common_peak	192	217	0.0383835	7.78738	0.325158
chr1	72078806	72079269	unique_peak2	54	98	-0.831816	6.21345	2.82014
chr1	72219633	72220372	merged_common_peak	526	485	0.489337	9.16948	7.55703
chr1	72245241	72245622	unique_peak2	53	53	0.0132876	5.76153	0.303059
chr1	72272587	72273371	unique_peak1	131	71	1.02868	6.68427	6.17704
chr1	72290282	72291452	unique_peak1	153	113	0.612416	7.1391	3.13797
chr1	72301212	72302442	merged_common_peak	172	136	0.533458	7.36476	2.81473
chr1	72309295	72310262	merged_common_peak	171	229	-0.223277	7.73385	0.823491
chr1	72334946	72335755	merged_common_peak	168	278	-0.530068	7.85909	3.65032
chr1	72353564	72354365	merged_common_peak	97	86	0.279022	6.58245	0.754242
chr1	72381218	72381868	merged_common_peak	85	91	-0.0106365	6.51824	0.30103
chr1	72656506	72656772	unique_peak2	12	18	-0.758725	3.86856	0.671583
chr1	72745416	72745896	unique_peak1	100	26	2.01533	5.76255	12.2138
chr1	72757622	72758707	merged_common_peak	125	154	-0.151965	7.20014	0.44585
chr1	72772192	72773103	merged_common_peak	480	674	-0.130761	9.33336	0.847692
chr1	72819196	72820587	merged_common_peak	478	454	0.431592	9.04552	5.5257
chr1	72838030	72839181	merged_common_peak	189	173	0.338553	7.61222	1.52451
chr1	72855672	72857326	merged_common_peak	403	436	0.217306	8.88014	1.49466
chr1	72889193	72889664	merged_common_peak	80	100	-0.241145	6.53764	0.565418
chr1	72916734	72917931	merged_common_peak	96	112	-0.114628	6.76287	0.365385
chr1	73346308	73347312	merged_common_peak	115	155	-0.293579	7.13861	0.905726
chr1	73676766	73677562	merged_common_peak	169	301	-0.63491	7.92095	5.36336
chr1	73981978	73982372	unique_peak2	49	82	-0.73003	6.01002	2.00247
chr1	74054935	74056071	merged_common_peak	276	394	-0.240886	8.50527	1.37605
chr1	74060985	74061558	merged_common_peak	1270	2063	-0.188184	10.9171	3.83395
chr1	74090170	74090727	merged_common_peak	120	121	0.128621	6.99505	0.424183
chr1	74090852	74091471	merged_common_peak	129	143	0.00425001	7.17205	0.301787
chr1	74104750	74105841	merged_common_peak	251	257	0.22222	8.12234	1.05521
chr1	74105933	74106685	merged_common_peak	235	374	-0.422279	8.33961	3.24503
chr1	74115377	74117318	merged_common_peak	269	291	0.154036	8.26684	0.708741
chr1	74122746	74123148	unique_peak2	68	96	-0.439453	6.38019	1.04809
chr1	74156042	74156658	merged_common_peak	118	116	0.162321	6.95153	0.498958
chr1	74244567	74245376	unique_peak2	106	133	-0.203514	6.96433	0.553256
chr1	74276450	74276896	merged_common_peak	112	116	0.0795248	6.91013	0.358947
chr1	74381970	74382665	merged_common_peak	157	128	0.475116	7.24879	2.14933
chr1	74425336	74426057	merged_common_peak	178	124	0.720269	7.32592	4.77226
chr1	74433146	74433954	merged_common_peak	104	114	-0.0131112	6.83893	0.30103
chr1	74476992	74477401	unique_peak1	58	27	1.10254	5.35862	3.08836
chr1	74552190	74553222	merged_common_peak	95	132	-0.366316	6.87212	1.08012
chr1	74744861	74746086	merged_common_peak	371	438	0.078655	8.8174	0.463793
chr1	74767595	74769139	merged_common_peak	596	641	0.287312	9.47009	3.38098
chr1	74797250	74797660	unique_peak2	55	55	0.0190216	5.81687	0.308786
chr1	74804803	74805620	merged_common_peak	125	143	-0.0457654	7.14704	0.307936
chr1	74854100	74854741	merged_common_peak	206	259	-0.103729	7.9705	0.426315
chr1	74947428	74947986	merged_common_peak	80	180	-1.08278	6.95846	7.86348
chr1	75008237	75008593	unique_peak1	44	29	0.569504	5.19164	1.05821
chr1	75018133	75018678	merged_common_peak	217	216	0.239949	7.88153	1.03801
chr1	75056377	75057267	merged_common_peak	227	170	0.655425	7.74556	5.19095
chr1	75060758	75061663	merged_common_peak	142	131	0.282312	7.18555	0.971502
chr1	75070876	75071489	merged_common_peak	76	74	0.1072	6.28242	0.3697
chr1	75091025	75091512	unique_peak1	79	42	0.970921	5.91173	3.40005
chr1	75094614	75095091	merged_common_peak	86	132	-0.523856	6.79335	1.77639
chr1	75138659	75139719	merged_common_peak	214	298	-0.244678	8.10166	1.13743
chr1	75143610	75144840	merged_common_peak	319	391	0.00105099	8.61524	0.301307
chr1	75144946	75145754	merged_common_peak	144	208	-0.358426	7.52815	1.48919
chr1	75210818	75211867	merged_common_peak	488	654	-0.0609698	9.32487	0.41554
chr1	75218923	75219355	merged_common_peak	92	97	0.0234475	6.62643	0.310951
chr1	75232625	75233705	unique_peak2	103	127	-0.182936	6.90853	0.478468
chr1	75334330	75334829	merged_common_peak	93	111	-0.152081	6.73131	0.403496
chr1	75518292	75518763	merged_common_peak	98	79	0.416285	6.53007	1.21981
chr1	75535282	75535774	unique_peak2	74	97	-0.320809	6.45431	0.749858
chr1	75537048	75537414	unique_peak1	50	32	0.632307	5.36055	1.25392
chr1	75584675	75585182	merged_common_peak	288	486	-0.475085	8.69024	5.1267
chr1	75656833	75657673	merged_common_peak	678	584	0.627422	9.506	15.3619
chr1	75689575	75690207	merged_common_peak	223	252	0.0619577	8.01397	0.361635
chr1	76046783	76047330	unique_peak1	90	43	1.14393	6.0314	4.94331
chr1	76907957	76908474	merged_common_peak	115	142	-0.168049	7.07585	0.482753
chr1	76915909	76916568	merged_common_peak	135	193	-0.353529	7.42315	1.36158
chr1	76939308	76939861	merged_common_peak	129	223	-0.63318	7.49076	4.02278
chr1	77276134	77276492	unique_peak2	35	50	-0.553142	5.39585	0.878853
chr1	78099491	78099857	unique_peak1	37	7	2.20581	4.10291	5.17358
chr1	78139530	78140141	unique_peak1	133	40	1.86512	6.29011	14.8316
chr1	78533414	78533749	unique_peak2	39	63	-0.712101	5.64395	1.53885
chr1	78534987	78535448	merged_common_peak	88	80	0.22795	6.45383	0.580562
chr1	78570174	78571247	unique_peak1	74	68	0.185377	6.20121	0.449877
chr1	78583524	78584202	merged_common_peak	191	173	0.355311	7.6206	1.67557
chr1	78645915	78646759	merged_common_peak	279	332	0.0226837	8.39072	0.312698
chr1	78655082	78655842	merged_common_peak	110	166	-0.462394	7.15251	1.83951
chr1	78673502	78674014	merged_common_peak	79	127	-0.602814	6.69859	2.21729
chr1	78690061	78690606	unique_peak1	123	37	1.85063	6.17324	13.5789
chr1	78926579	78926854	unique_peak2	18	17	-0.0734016	4.13322	0.30103
chr1	79412975	79413368	merged_common_peak	98	76	0.471426	6.5025	1.44687
chr1	79462964	79463680	merged_common_peak	294	351	0.0261466	8.4725	0.316038
chr1	79772184	79772921	merged_common_peak	117	115	0.161199	6.93858	0.500576
chr1	79846838	79847353	unique_peak1	57	28	1.02455	5.37026	2.75316
chr1	79881634	79882081	merged_common_peak	53	64	-0.254193	5.89527	0.485274
chr1	80424474	80424908	merged_common_peak	186	223	-0.0513291	7.78169	0.325268
chr1	81741178	81742088	merged_common_peak	80	98	-0.21229	6.52321	0.501734
chr1	81750647	81751102	merged_common_peak	61	63	-0.0107342	5.99463	0.30274
chr1	81900649	81901043	unique_peak2	46	53	-0.208901	5.65044	0.37925
chr1	81947355	81947815	merged_common_peak	47	52	-0.148241	5.6538	0.335783
chr1	81994146	81994384	unique_peak2	2	8	-2.0274	2.15623	1.65812
chr1	82015312	82015563	unique_peak2	18	16	0.00906055	4.09199	0.307611
chr1	82028997	82029663	merged_common_peak	91	76	0.354069	6.44382	0.906668
chr1	82155653	82156320	merged_common_peak	491	543	0.216707	9.19582	1.76628
chr1	82165325	82166007	merged_common_peak	427	479	0.174259	8.99402	1.1457
chr1	82166986	82167469	merged_common_peak	106	164	-0.503747	7.11445	2.0967
chr1	82180316	82181082	merged_common_peak	286	320	0.11515	8.384	0.55596
chr1	82181107	82181591	unique_peak2	94	147	-0.537244	6.94083	2.07673
chr1	82185067	82185747	merged_common_peak	146	217	-0.397328	7.56952	1.78009
chr1	82199241	82199670	unique_peak2	37	43	-0.253621	5.33262	0.398838
chr1	82234767	82235387	merged_common_peak	148	209	-0.321762	7.55336	1.27118
chr1	82243771	82244807	unique_peak1	147	74	1.15289	6.80526	8.29995
chr1	82254895	82255535	merged_common_peak	104	81	0.474827	6.59497	1.51957
chr1	82280418	82281441	merged_common_peak	194	208	0.115707	7.76521	0.463186
chr1	82282708	82283011	unique_peak2	71	79	-0.0933571	6.27525	0.323593
chr1	82638048	82638608	merged_common_peak	111	166	-0.44804	7.15968	1.76647
chr1	82721250	82722007	merged_common_peak	91	118	-0.273962	6.75784	0.703731
chr1	82783935	82784256	unique_peak2	18	21	-0.362908	4.27798	0.39263
chr1	82812395	82812940	merged_common_peak	148	122	0.449969	7.1675	1.89217
chr1	82819370	82819658	unique_peak2	19	16	0.0911485	4.13304	0.326591
chr1	83903399	83904045	merged_common_peak	74	63	0.293901	6.14695	0.648198
chr1	83934899	83935161	unique_peak2	22	19	0.0803531	4.3621	0.322754
chr1	83939709	83940073	merged_common_peak	51	39	0.385849	5.51485	0.705686
chr1	84044641	84045045	merged_common_peak	42	62	-0.573642	5.69046	1.14144
chr1	84182512	84183019	merged_common_peak	94	158	-0.640674	6.99255	2.9408
chr1	84237568	84238594	merged_common_peak	304	308	0.267466	8.4052	1.61096
chr1	84250386	84251265	merged_common_peak	144	143	0.179009	7.25943	0.585085
chr1	84274733	84275385	merged_common_peak	313	413	-0.108018	8.63948	0.530216
chr1	84275433	84276017	merged_common_peak	1069	1436	0.0587038	10.5182	0.576537
chr1	84281881	84282745	merged_common_peak	209	182	0.425966	7.72868	2.38696
chr1	84396103	84396880	merged_common_peak	186	106	1.01456	7.24875	8.62753
chr1	84406028	84406515	merged_common_peak	92	58	0.755514	6.2604	2.75477
chr1	84415945	84416872	merged_common_peak	183	99	1.08629	7.187	9.42396
chr1	84718880	84719398	merged_common_peak	95	119	-0.217924	6.79793	0.551651
chr1	84794111	84794543	merged_common_peak	56	53	0.0998148	5.80479	0.349954
chr1	84835764	84836363	merged_common_peak	110	107	0.166423	6.8381	0.487818
chr1	84848268	84848729	unique_peak2	53	52	0.0402546	5.74805	0.309225
chr1	84868567	84869208	merged_common_peak	101	134	-0.290827	6.9314	0.81447
chr1	87855701	87856034	unique_peak2	38	52	-0.480539	5.48765	0.775854
chr1	87856546	87856900	unique_peak2	43	46	-0.114159	5.49751	0.322993
chr1	87935087	87935644	merged_common_peak	129	138	0.0552339	7.14656	0.328753
chr1	87936622	87937168	merged_common_peak	413	375	0.473338	8.79126	5.55584
chr1	87952699	87953512	merged_common_peak	397	519	-0.0575181	8.99361	0.377963
chr1	87955384	87956343	merged_common_peak	216	226	0.167593	7.91035	0.680929
chr1	88303043	88303933	merged_common_peak	85	106	-0.228542	6.6272	0.549281
chr1	88366740	88367878	merged_common_peak	147	194	-0.225624	7.49452	0.739945
chr1	88375365	88376143	merged_common_peak	679	1167	-0.367755	10.0059	7.51427
chr1	88383709	88384754	merged_common_peak	138	162	-0.0674256	7.31502	0.325614
chr1	88401742	88402297	unique_peak2	62	63	0.0148722	6.00744	0.307816
chr1	88424379	88425646	merged_common_peak	354	418	0.071067	8.74634	0.423537
chr1	88486792	88487234	merged_common_peak	85	109	-0.268434	6.64714	0.653285
chr1	88491846	88492648	merged_common_peak	354	525	-0.257046	8.9104	1.92893
chr1	88504510	88505132	merged_common_peak	181	221	-0.081763	7.75353	0.361999
chr1	88529707	88530397	unique_peak2	71	86	-0.214373	6.33576	0.464355
chr1	88609604	88610315	merged_common_peak	92	97	0.0234475	6.62643	0.310951
chr1	88635179	88635521	merged_common_peak	46	61	-0.40821	5.75009	0.696223
chr1	88779108	88779521	merged_common_peak	64	119	-0.842003	6.48589	3.5003
chr1	88829568	88829917	unique_peak1	45	25	0.811129	5.106	1.67018
chr1	88848356	88848780	merged_common_peak	64	50	0.392462	5.86866	0.839306
chr1	88916373	88917202	unique_peak1	155	54	1.6846	6.62366	15.2851
chr1	88928892	88929683	unique_peak1	113	75	0.716062	6.60596	3.04438
chr1	89058592	89058942	merged_common_peak	64	58	0.182245	5.97377	0.441863
chr1	89142704	89143053	unique_peak2	29	40	-0.530049	5.09253	0.763288
chr1	89256863	89257245	merged_common_peak	116	120	0.0866967	6.96221	0.357078
chr1	89401455	89401814	unique_peak2	39	34	0.158616	5.20859	0.375454
chr1	89470234	89471896	merged_common_peak	718	975	-0.0194177	9.92103	0.317165
chr1	89480230	89480706	unique_peak2	43	90	-1.06737	5.97411	3.98672
chr1	89668206	89668724	merged_common_peak	151	143	0.254461	7.29716	0.8816
chr1	89669614	89670354	merged_common_peak	147	211	-0.346214	7.55481	1.41572
chr1	89675662	89676675	merged_common_peak	131	158	-0.114274	7.25575	0.387196
chr1	89743295	89743940	merged_common_peak	87	96	-0.0501958	6.57481	0.305602
chr1	89776099	89776666	unique_peak2	66	80	-0.226463	6.22662	0.477532
chr1	89778263	89778667	unique_peak2	49	80	-0.694841	5.99243	1.81799
chr1	89793408	89793905	unique_peak2	58	99	-0.733963	6.27687	2.39962
chr1	89805072	89805860	merged_common_peak	95	89	0.197114	6.59041	0.522898
chr1	89889312	89889727	merged_common_peak	84	150	-0.744197	6.86631	3.59305
chr1	89910218	89912412	merged_common_peak	660	668	0.390855	9.58129	6.45919
chr1	89921308	89922021	merged_common_peak	192	255	-0.193432	7.90328	0.736989
chr1	89936945	89937722	merged_common_peak	160	160	0.185528	7.42368	0.636182
chr1	89938801	89939341	unique_peak1	147	119	0.474816	7.1443	2.05866
chr1	89941234	89941951	merged_common_peak	214	255	-0.0206764	7.98966	0.304885
chr1	89945310	89946204	merged_common_peak	250	253	0.238399	8.10788	1.16949
chr1	89960438	89961361	merged_common_peak	136	135	0.170646	7.17279	0.54548
chr1	89962292	89962876	merged_common_peak	113	99	0.320133	6.80392	0.957829
chr1	89970733	89971542	merged_common_peak	300	409	-0.161679	8.59864	0.794889
chr1	90005545	90006056	unique_peak2	68	104	-0.553785	6.43735	1.57149
chr1	90068678	90069168	merged_common_peak	205	155	0.625487	7.59815	4.38914
chr1	90076001	90076784	merged_common_peak	126	125	0.159531	7.05705	0.51014
chr1	90081305	90081774	unique_peak1	75	51	0.614658	6.00777	1.7067
chr1	90103243	90103940	merged_common_peak	282	383	-0.165845	8.50204	0.804781
chr1	90107990	90111903	merged_common_peak	1269	1376	0.394471	10.6245	13.1788
chr1	90119371	90121502	merged_common_peak	795	791	0.44478	9.85175	9.90893
chr1	90148791	90151074	unique_peak2	463	460	0.361775	9.02951	3.90708
chr1	90154950	90159874	merged_common_peak	1361	1624	0.267485	10.8	6.99636
chr1	90163461	90167026	merged_common_peak	993	966	0.512267	10.1735	16.1784
chr1	90172249	90177448	merged_common_peak	2754	2968	0.525345	11.7984	51.6524
chr1	90183533	90185681	unique_peak2	818	673	0.723119	9.75816	24.0836
chr1	90302719	90304285	merged_common_peak	473	533	0.183826	9.15261	1.34483
chr1	90315502	90315922	unique_peak2	82	79	0.134174	6.38901	0.406404
chr1	90318533	90319150	merged_common_peak	313	253	0.596784	8.28708	6.193
chr1	90455927	90456599	merged_common_peak	285	205	0.749493	8.06125	8.2239
chr1	90461377	90461886	merged_common_peak	108	79	0.570284	6.60707	2.06789
chr1	90463246	90463738	unique_peak1	87	19	2.22779	5.43582	12.0899
chr1	90602410	90602768	unique_peak2	26	35	-0.511037	4.91441	0.664636
chr1	90851232	90851939	merged_common_peak	817	1113	-0.00376547	10.1197	0.301421
chr1	90922557	90923170	merged_common_peak	93	110	-0.139142	6.72484	0.384415
chr1	90966375	90966974	merged_common_peak	75	91	-0.208464	6.41933	0.45479
chr1	91000956	91001515	merged_common_peak	220	257	0.0121458	8.0173	0.30481
chr1	91241103	91241493	merged_common_peak	51	45	0.184215	5.61567	0.410818
chr1	91412324	91412798	merged_common_peak	84	66	0.428118	6.28015	1.106
chr1	91453753	91454422	merged_common_peak	92	125	-0.339123	6.80772	0.905464
chr1	91566847	91567362	unique_peak2	47	67	-0.507783	5.83357	0.985819
chr1	91606424	91606834	unique_peak2	60	82	-0.411796	6.16914	0.906171
chr1	91792289	91792831	merged_common_peak	67	81	-0.220455	6.24732	0.47519
chr1	91806352	91806926	merged_common_peak	216	179	0.502289	7.743	3.20594
chr1	91815810	91816227	merged_common_peak	80	49	0.77321	6.03046	2.42722
chr1	92130987	92131563	unique_peak1	93	72	0.465449	6.42255	1.36164
chr1	92136752	92137183	unique_peak2	57	54	0.101176	5.83195	0.349087
chr1	92301214	92302164	merged_common_peak	531	435	0.661077	9.09872	12.8733
chr1	93147814	93148313	merged_common_peak	159	145	0.316649	7.34815	1.21208
chr1	93197831	93198648	merged_common_peak	153	141	0.295559	7.29753	1.05312
chr1	93213863	93214748	merged_common_peak	283	261	0.39134	8.22909	2.78145
chr1	93309467	93310581	merged_common_peak	229	217	0.31907	7.92772	1.64717
chr1	93316672	93317741	merged_common_peak	304	371	-0.000230176	8.53904	0.301322
chr1	93318476	93319441	unique_peak1	178	155	0.400651	7.48573	1.87082
chr1	93332865	93333735	merged_common_peak	126	139	0.00752773	7.13305	0.304132
chr1	93352159	93353632	merged_common_peak	429	638	-0.231061	9.20414	1.92602
chr1	93424548	93424760	unique_peak2	9	10	-0.390108	3.26438	1.07851
chr1	93436460	93437500	merged_common_peak	159	142	0.346602	7.33317	1.3761
chr1	93720014	93720573	merged_common_peak	116	159	-0.316368	7.16374	1.02955
chr1	93768843	93769380	merged_common_peak	100	148	-0.448948	6.99469	1.59115
chr1	93771204	93771552	merged_common_peak	47	36	0.370226	5.39457	0.674559
chr1	93779598	93780202	merged_common_peak	384	506	-0.0741382	8.94877	0.427638
chr1	93790829	93791310	unique_peak2	48	68	-0.495847	5.8606	0.974008
chr1	93799898	93800813	merged_common_peak	108	118	-0.00260529	6.89352	0.301946
chr1	93817803	93818299	merged_common_peak	69	49	0.539631	5.91367	1.33297
chr1	93865569	93865930	unique_peak2	37	53	-0.549077	5.48035	0.921989
chr1	93884793	93886001	merged_common_peak	611	748	0.104633	9.60114	0.755421
chr1	93984236	93984866	merged_common_peak	300	394	-0.107907	8.57176	0.50909
chr1	93996839	93997613	merged_common_peak	183	175	0.270712	7.59479	1.07036
chr1	94605726	94606455	merged_common_peak	111	113	0.102774	6.88428	0.375895
chr1	94606798	94607401	merged_common_peak	129	111	0.36682	6.99076	1.23098
chr1	94620262	94621197	merged_common_peak	113	94	0.394134	6.76692	1.25711
chr1	94830560	94831629	merged_common_peak	230	319	-0.227731	8.20806	1.07797
chr1	94925805	94927028	merged_common_peak	142	121	0.395969	7.12872	1.53724
chr1	95024559	95025338	unique_peak2	171	206	-0.0712742	7.65785	0.344679
chr1	95028833	95029958	merged_common_peak	261	320	-0.0307037	8.31108	0.31336
chr1	95106917	95107309	unique_peak2	45	93	-1.04302	6.03308	3.82092
chr1	95125662	95126092	unique_peak2	43	132	-1.61485	6.24786	10.6045
chr1	95374454	95376049	merged_common_peak	252	291	0.0499605	8.2148	0.345341
chr1	95410873	95411152	unique_peak1	32	24	0.336178	4.81194	0.550049
chr1	95459867	95460062	unique_peak2	6	0	2.49851	1.24926	2.10721
chr1	95463576	95464066	unique_peak2	56	69	-0.274581	5.99199	0.508178
chr1	95565221	95565818	merged_common_peak	75	69	0.185815	6.22219	0.477532
chr1	95574855	95575356	merged_common_peak	68	75	-0.0874674	6.20419	0.314326
chr1	95584750	95585390	merged_common_peak	112	83	0.557572	6.6711	2.07615
chr1	95589979	95590945	unique_peak1	145	52	1.63201	6.54393	13.5481
chr1	95642790	95643278	unique_peak1	69	44	0.691634	5.83767	1.87828
chr1	95721489	95722332	merged_common_peak	170	143	0.442956	7.3914	2.10774
chr1	96835747	96836153	merged_common_peak	85	62	0.535645	6.2451	1.50188
chr1	96934705	96935418	merged_common_peak	94	54	0.890849	6.22678	3.56075
chr1	97213517	97213962	merged_common_peak	204	182	0.387402	7.7094	1.98199
chr1	99454075	99454408	unique_peak1	32	6	2.17268	3.89369	4.5421
chr1	99495675	99496070	unique_peak2	35	40	-0.238268	5.23842	0.373466
chr1	99665714	99666872	merged_common_peak	177	176	0.209482	7.57235	0.780814
chr1	99815041	99815410	merged_common_peak	57	51	0.182096	5.79149	0.427482
chr1	101057086	101057488	unique_peak1	80	14	2.51018	5.16198	12.5815
chr1	101874895	101875152	unique_peak2	30	26	0.125091	4.81743	0.336581
chr1	102278753	102279217	merged_common_peak	240	167	0.769702	7.77717	7.16947
chr1	102281609	102282097	unique_peak1	93	67	0.567811	6.37137	1.80558
chr1	102446178	102446523	merged_common_peak	88	55	0.760445	6.18758	2.64553
chr1	102579241	102579794	unique_peak1	100	28	1.91224	5.8141	11.4113
chr1	102603423	102603881	unique_peak2	79	68	0.288662	6.25286	0.66743
chr1	102606082	102606792	merged_common_peak	170	75	1.36495	6.9304	12.4573
chr1	104414407	104415023	unique_peak1	94	3	4.67221	4.3361	25.9929
chr1	104524675	104524929	unique_peak2	2	6	-1.66483	1.97494	1.26211
chr1	104631997	104632410	unique_peak1	57	16	1.79507	4.985	5.99487
chr1	104945522	104945806	unique_peak1	15	4	1.49957	3.07171	2.23385
chr1	106501910	106502339	unique_peak2	50	73	-0.532753	5.94308	1.15311
chr1	106835709	106836136	merged_common_peak	337	486	-0.224437	8.81556	1.44704
chr1	107001729	107002182	unique_peak1	62	25	1.31443	5.35766	4.29977
chr1	107009718	107010196	merged_common_peak	398	501	-0.00267787	8.9702	0.30103
chr1	107011001	107012347	merged_common_peak	903	1198	0.0501357	10.2527	0.465657
chr1	107012792	107013506	merged_common_peak	197	297	-0.371668	8.03333	2.15571
chr1	107048702	107048971	unique_peak2	13	17	-0.562123	3.88886	0.489165
chr1	107054381	107054891	unique_peak2	35	41	-0.273034	5.2558	0.403996
chr1	107072182	107072612	unique_peak1	125	94	0.554304	6.84701	2.27748
chr1	107075127	107076601	merged_common_peak	370	358	0.364584	8.67013	3.17298
chr1	107190144	107190517	merged_common_peak	97	93	0.167376	6.63828	0.485573
chr1	107201407	107201856	merged_common_peak	55	70	-0.323371	5.98806	0.590496
chr1	107257540	107258031	merged_common_peak	88	69	0.438517	6.34854	1.19989
chr1	107280677	107281549	merged_common_peak	390	409	0.256972	8.80797	1.88795
chr1	107614920	107615529	merged_common_peak	210	453	-0.87728	8.38791	13.662
chr1	107623801	107624184	merged_common_peak	76	107	-0.418869	6.54545	1.08434
chr1	107781616	107782149	merged_common_peak	218	220	0.220922	7.89836	0.957707
chr1	107796636	107797878	merged_common_peak	243	272	0.0890607	8.13729	0.426239
chr1	107802405	107803398	unique_peak2	172	240	-0.281399	7.77219	1.17691
chr1	107804771	107805583	merged_common_peak	416	538	-0.0346601	9.05681	0.330419
chr1	107821952	107822798	merged_common_peak	194	237	-0.0717512	7.85894	0.357784
chr1	107823468	107823997	merged_common_peak	203	183	0.371714	7.70942	1.86576
chr1	107850201	107851157	merged_common_peak	666	814	0.120522	9.73092	0.963399
chr1	107877791	107878307	merged_common_peak	85	121	-0.417812	6.72183	1.22598
chr1	107910420	107910781	unique_peak2	32	43	-0.479398	5.21973	0.652628
chr1	108051712	108052199	merged_common_peak	211	245	0.0143211	7.94968	0.304994
chr1	108067519	108068595	merged_common_peak	225	294	-0.145394	8.13187	0.583314
chr1	108074613	108075228	unique_peak2	64	82	-0.310152	6.21996	0.629493
chr1	108085348	108085796	merged_common_peak	89	153	-0.681105	6.92623	3.15969
chr1	108089425	108090192	merged_common_peak	295	231	0.633013	8.17449	6.46482
chr1	108097299	108097834	merged_common_peak	89	81	0.22813	6.47162	0.577396
chr1	108098156	108098518	unique_peak2	58	68	-0.198632	6.00921	0.409674
chr1	108120303	108120811	merged_common_peak	64	54	0.283528	5.92312	0.604904
chr1	108164505	108165238	merged_common_peak	77	90	-0.151126	6.43223	0.381858
chr1	108526014	108526382	merged_common_peak	41	48	-0.248729	5.49035	0.420707
chr1	108655620	108656673	unique_peak1	98	104	0.0239671	6.72623	0.310293
chr1	109510631	109511049	merged_common_peak	107	97	0.262753	6.74609	0.747145
chr1	109536707	109537156	merged_common_peak	59	89	-0.555063	6.21432	1.44267
chr1	109921315	109921618	merged_common_peak	29	44	-0.66435	5.15968	1.07959
chr1	111265878	111266289	unique_peak1	57	42	0.456271	5.6544	0.92534
chr1	113760460	113760905	merged_common_peak	80	46	0.862478	5.98583	2.86089
chr1	114844522	114844902	merged_common_peak	57	53	0.127648	5.81871	0.370861
chr1	115090671	115091088	merged_common_peak	81	40	1.07915	5.89713	4.16934
chr1	116765084	116765627	unique_peak1	75	16	2.22764	5.20128	10.415
chr1	116772421	116772871	unique_peak1	75	10	2.85567	4.88726	13.7591
chr1	117886889	117887168	unique_peak2	14	15	-0.281785	3.85911	0.332077
chr1	117942987	117943248	unique_peak2	14	11	0.133253	3.65159	0.337263
chr1	120207670	120208237	unique_peak2	34	37	-0.173728	5.16106	0.328564
chr1	120231309	120232351	merged_common_peak	135	157	-0.0573966	7.27508	0.318599
chr1	120251557	120251858	unique_peak2	23	34	-0.658891	4.79984	0.863762
chr1	120285286	120286094	merged_common_peak	128	128	0.15059	7.08652	0.48141
chr1	120299564	120299980	unique_peak1	109	30	1.95263	5.93051	12.8572
chr1	120317869	120318158	unique_peak2	9	24	-1.57453	3.85659	2.11898
chr1	120355400	120356373	merged_common_peak	149	111	0.595833	7.10527	2.92888
chr1	120373281	120373839	unique_peak2	62	58	0.132229	5.94876	0.387583
chr1	120377894	120378339	merged_common_peak	70	78	-0.0975929	6.25498	0.32389
chr1	120510112	120510640	merged_common_peak	117	134	-0.0576355	7.048	0.314191
chr1	120539737	120540298	merged_common_peak	86	82	0.156387	6.45323	0.451271
chr1	120708685	120709320	unique_peak1	149	43	1.94376	6.43131	17.6882
chr1	120774721	120775214	merged_common_peak	155	175	0.00652414	7.46269	0.303498
chr1	120863637	120864232	merged_common_peak	100	125	-0.207059	6.87375	0.538778
chr1	121043207	121043828	merged_common_peak	91	85	0.194591	6.52356	0.501734
chr1	121069684	121070438	merged_common_peak	87	85	0.123452	6.48799	0.399334
chr1	121087663	121088206	merged_common_peak	924	1269	0.00389018	10.3126	0.302397
chr1	121113979	121114276	unique_peak2	28	64	-1.24912	5.39781	3.66433
chr1	121145107	121145992	unique_peak2	64	92	-0.474271	6.30202	1.15815
chr1	121175372	121175718	unique_peak2	54	58	-0.0851027	5.84009	0.30865
chr1	121190277	121190885	unique_peak1	137	120	0.350884	7.09431	1.21954
chr1	121191676	121192225	merged_common_peak	629	860	-0.0500243	9.72486	0.401651
chr1	121225558	121225865	unique_peak2	19	27	-0.628744	4.49298	0.694543
chr1	121415253	121415821	merged_common_peak	98	88	0.262479	6.60697	0.703669
chr1	121437331	121438072	merged_common_peak	81	95	-0.148259	6.51083	0.377414
chr1	121448049	121448634	merged_common_peak	104	107	0.0774913	6.79363	0.349184
chr1	121454152	121455051	merged_common_peak	380	527	-0.149404	8.96969	0.864384
chr1	121462036	121462916	merged_common_peak	415	355	0.559906	8.75569	7.47737
chr1	121486564	121486967	merged_common_peak	168	277	-0.524888	7.8565	3.57859
chr1	121563441	121564238	merged_common_peak	495	960	-0.591265	9.61276	14.4873
chr1	121733824	121734561	merged_common_peak	113	176	-0.503616	7.2158	2.18652
chr1	121854509	121854709	unique_peak2	5	3	0.251817	2.12591	0.961082
chr1	121957171	121957619	unique_peak2	46	84	-0.863405	5.97769	2.60148
chr1	121969333	121969941	merged_common_peak	111	106	0.194197	6.83857	0.545045
chr1	121996852	121997529	merged_common_peak	150	167	0.0215046	7.40307	0.311309
chr1	122011727	122013194	unique_peak1	191	161	0.458404	7.56905	2.48431
chr1	122021310	122021741	unique_peak2	69	88	-0.292246	6.32961	0.604937
chr1	122166614	122167166	merged_common_peak	90	103	-0.0970742	6.6519	0.340122
chr1	122551203	122552111	merged_common_peak	131	128	0.187381	7.10492	0.586312
chr1	122745904	122746413	merged_common_peak	52	87	-0.721171	6.09885	2.1121
chr1	123225829	123226665	merged_common_peak	249	304	-0.0319704	8.23668	0.314016
chr1	123228841	123229873	unique_peak2	137	281	-0.869804	7.70465	8.47092
chr1	123232241	123233110	merged_common_peak	201	209	0.165263	7.79688	0.631831
chr1	123245291	123246091	merged_common_peak	140	149	0.0753465	7.26649	0.358331
chr1	123247142	123247989	merged_common_peak	348	546	-0.340803	8.925	3.19313
chr1	123287046	123287742	merged_common_peak	103	87	0.357633	6.63825	1.03707
chr1	124253576	124253928	merged_common_peak	57	91	-0.641027	6.20305	1.79488
chr1	127315288	127315734	merged_common_peak	130	210	-0.534661	7.45377	2.81308
chr1	127322199	127322628	unique_peak2	34	44	-0.417653	5.28303	0.580192
chr1	127329654	127330013	unique_peak1	62	41	0.622555	5.70359	1.49129
chr1	127415540	127416444	merged_common_peak	250	295	0.0176303	8.21827	0.310154
chr1	127429706	127430100	unique_peak1	69	34	1.0542	5.65639	3.46003
chr1	127448182	127448546	unique_peak1	50	22	1.15314	5.10013	2.87303
chr1	127456784	127457916	merged_common_peak	130	178	-0.297377	7.33513	0.988443
chr1	127581853	127582203	unique_peak2	41	41	-0.0263367	5.37915	0.30103
chr1	127590101	127590440	merged_common_peak	83	114	-0.370222	6.66038	0.971287
chr1	127590856	127591394	merged_common_peak	156	105	0.748261	7.10205	4.43659
chr1	127745486	127745701	unique_peak2	15	8	0.651576	3.49571	0.660903
chr1	127864290	127864789	unique_peak1	54	38	0.512138	5.54147	1.05414
chr1	128328159	128328639	merged_common_peak	183	221	-0.0642725	7.76228	0.341654
chr1	128489599	128490671	unique_peak1	104	99	0.188523	6.73812	0.530601
chr1	128501124	128501536	merged_common_peak	60	85	-0.463022	6.19475	1.08568
chr1	128518809	128519105	unique_peak2	23	30	-0.483804	4.71229	0.569353
chr1	128569570	128570365	unique_peak1	111	59	1.02877	6.42128	5.16381
chr1	128634261	128634971	merged_common_peak	144	116	0.478569	7.10965	2.02853
chr1	128725543	128726040	merged_common_peak	67	101	-0.535329	6.40476	1.52815
chr1	128942215	128943001	unique_peak1	141	57	1.45749	6.58673	11.1885
chr1	129101154	129101928	merged_common_peak	77	75	0.108741	6.3023	0.368825
chr1	129165863	129166305	unique_peak1	59	36	0.727337	5.57312	1.71609
chr1	129251660	129252183	merged_common_peak	180	130	0.670412	7.36863	4.24513
chr1	129294797	129295166	merged_common_peak	56	62	-0.122578	5.91599	0.329988
chr1	129504794	129505326	merged_common_peak	80	86	-0.0258769	6.43001	0.3023
chr1	129625442	129626148	merged_common_peak	138	148	0.062134	7.25024	0.34675
chr1	129628630	129629515	merged_common_peak	220	215	0.268486	7.88913	1.22815
chr1	129646885	129647699	merged_common_peak	99	109	-0.0270629	6.76783	0.302031
chr1	129652259	129652840	merged_common_peak	88	83	0.175483	6.48006	0.476833
chr1	129672772	129673384	merged_common_peak	185	263	-0.296949	7.89592	1.34946
chr1	129765191	129765937	unique_peak2	61	83	-0.403052	6.19079	0.835791
chr1	129970427	129971037	merged_common_peak	140	124	0.338381	7.13497	1.19335
chr1	129977540	129978253	merged_common_peak	101	111	-0.0213667	6.79667	0.302013
chr1	130055240	130055473	unique_peak1	8	0	2.90071	1.45035	2.40824
chr1	130140293	130140890	merged_common_peak	107	99	0.233606	6.76066	0.662738
chr1	130313116	130313744	merged_common_peak	108	158	-0.42067	7.10255	1.49735
chr1	130483375	130483704	merged_common_peak	38	44	-0.244472	5.36962	0.396448
chr1	130722876	130723571	merged_common_peak	222	225	0.217612	7.92898	0.944223
chr1	130728822	130729484	unique_peak1	66	58	0.230744	5.99802	0.508178
chr1	131147130	131147608	unique_peak1	49	23	1.06005	5.11499	2.52189
chr1	132206335	132206773	merged_common_peak	197	250	-0.124044	7.90952	0.482038
chr1	132530355	132531007	merged_common_peak	96	157	-0.59823	7.00467	2.6544
chr1	132554228	132555089	merged_common_peak	148	137	0.283959	7.2505	0.986405
chr1	132557950	132558712	merged_common_peak	138	166	-0.102402	7.3325	0.368478
chr1	132574768	132575754	merged_common_peak	1050	1484	-0.017372	10.5276	0.322296
chr1	132581596	132581971	merged_common_peak	63	64	0.0177075	6.03122	0.307712
chr1	132629749	132631092	merged_common_peak	162	162	0.187474	7.44247	0.660732
chr1	132658031	132658572	merged_common_peak	134	105	0.506653	6.98125	2.10567
chr1	132660424	132661160	merged_common_peak	243	306	-0.080277	8.22196	0.394313
chr1	132694548	132695538	merged_common_peak	161	130	0.492931	7.27989	2.32765
chr1	132718090	132719306	merged_common_peak	534	535	0.372172	9.25217	4.78038
chr1	132725150	132725987	merged_common_peak	234	280	-0.0127545	8.12805	0.301418
chr1	132731692	132732278	unique_peak1	95	93	0.134378	6.62178	0.411868
chr1	132737504	132738369	merged_common_peak	321	367	0.10217	8.57465	0.524497
chr1	132754064	132754385	unique_peak1	27	17	0.547164	4.44351	0.713115
chr1	132936666	132936952	unique_peak2	21	28	-0.526839	4.59456	0.591915
chr1	132949851	132950291	merged_common_peak	89	118	-0.309136	6.74025	0.793017
chr1	132968687	132969561	unique_peak2	99	100	0.0960854	6.70625	0.367861
chr1	132980131	132980755	merged_common_peak	289	222	0.657321	8.12956	6.7502
chr1	132990257	132991363	merged_common_peak	377	595	-0.33683	9.05075	3.38682
chr1	133004478	133004961	merged_common_peak	106	108	0.0943909	6.81538	0.363085
chr1	133022642	133023238	merged_common_peak	156	163	0.11863	7.41687	0.444355
chr1	133049411	133050065	merged_common_peak	111	184	-0.595718	7.23352	3.04783
chr1	133056325	133056995	unique_peak2	56	98	-0.774654	6.24203	2.55325
chr1	133095502	133096140	merged_common_peak	138	156	-0.0133182	7.28796	0.30103
chr1	133102801	133103305	merged_common_peak	101	100	0.127777	6.7221	0.404473
chr1	133134675	133135145	merged_common_peak	365	406	0.161824	8.7498	0.906898
chr1	133178188	133179094	merged_common_peak	143	158	0.0249754	7.32537	0.311888
chr1	133317228	133317661	merged_common_peak	62	118	-0.879946	6.45484	3.68241
chr1	133382481	133383172	merged_common_peak	155	187	-0.0886331	7.51027	0.360693
chr1	133385822	133386595	merged_common_peak	135	164	-0.119938	7.30635	0.400007
chr1	133425167	133425769	unique_peak2	70	89	-0.285665	6.34902	0.601198
chr1	133445421	133446009	merged_common_peak	187	283	-0.385186	7.95715	2.19835
chr1	133509044	133509870	merged_common_peak	253	284	0.09128	8.20046	0.448778
chr1	133509938	133512006	merged_common_peak	404	493	0.0443849	8.97056	0.356511
chr1	133515545	133517865	merged_common_peak	366	469	-0.0414409	8.8558	0.334799
chr1	133520157	133521212	merged_common_peak	242	249	0.209461	8.07051	0.947417
chr1	133534390	133535707	merged_common_peak	215	244	0.0501119	7.96169	0.344637
chr1	133554275	133555091	merged_common_peak	117	122	0.0766656	6.98085	0.356188
chr1	133613025	133613556	unique_peak2	33	38	-0.257593	5.15661	0.377554
chr1	133693526	133694198	merged_common_peak	88	81	0.210248	6.46268	0.543109
chr1	133699109	133699594	merged_common_peak	86	95	-0.0535356	6.55819	0.30565
chr1	133709124	133709899	merged_common_peak	103	97	0.202354	6.71589	0.566
chr1	133818648	133819154	merged_common_peak	294	137	1.37705	7.79705	22.5021
chr1	133834290	133834614	unique_peak2	37	40	-0.151741	5.28168	0.326417
chr1	133835316	133835942	merged_common_peak	99	79	0.432369	6.53811	1.28156
chr1	133853971	133854604	merged_common_peak	74	97	-0.320809	6.45431	0.749858
chr1	133865143	133865982	unique_peak2	116	142	-0.154311	7.08272	0.458734
chr1	133886182	133887472	merged_common_peak	327	429	-0.0929149	8.70174	0.477491
chr1	133888853	133889944	merged_common_peak	757	987	0.0474868	9.97211	0.426047
chr1	133903126	133903755	merged_common_peak	224	255	0.0520799	8.02604	0.342792
chr1	133907227	133907648	unique_peak2	63	118	-0.854742	6.46745	3.53605
chr1	134052203	134052765	merged_common_peak	214	308	-0.292139	8.12539	1.51909
chr1	134053807	134054685	merged_common_peak	297	378	-0.0642831	8.53391	0.376157
chr1	134194816	134195494	merged_common_peak	201	223	0.0721534	7.84343	0.369311
chr1	134224880	134225798	merged_common_peak	182	191	0.13646	7.65319	0.517186
chr1	134252311	134252801	unique_peak2	57	91	-0.641027	6.20305	1.79488
chr1	134310058	134310446	unique_peak2	47	60	-0.351058	5.75521	0.591158
chr1	134373041	134373892	merged_common_peak	603	792	0.00121975	9.63179	0.301578
chr1	134483192	134483819	merged_common_peak	297	351	0.0423393	8.4806	0.337883
chr1	134543706	134544221	merged_common_peak	78	77	0.0916532	6.33123	0.3499
chr1	134687513	134687972	merged_common_peak	141	169	-0.0939157	7.36243	0.367244
chr1	134917008	134917385	unique_peak2	34	53	-0.680688	5.41454	1.20937
chr1	134921459	134922343	merged_common_peak	129	150	-0.0642297	7.20629	0.327621
chr1	134973474	134973902	merged_common_peak	61	108	-0.778918	6.37873	2.77258
chr1	134987227	134987539	unique_peak2	14	33	-1.36925	4.40284	2.25377
chr1	134999653	135000360	merged_common_peak	348	511	-0.245406	8.8773	1.73985
chr1	135044007	135044280	unique_peak2	18	36	-1.11293	4.65299	1.81352
chr1	135106874	135107831	merged_common_peak	124	127	0.111408	7.0557	0.400209
chr1	135121256	135122303	merged_common_peak	160	191	-0.0685179	7.5507	0.338192
chr1	135142351	135143230	unique_peak1	112	110	0.155474	6.87215	0.483023
chr1	135150645	135151070	unique_peak2	64	74	-0.163931	6.14685	0.376524
chr1	135151812	135152403	merged_common_peak	331	364	0.162924	8.59321	0.870204
chr1	135161576	135163245	merged_common_peak	220	197	0.394016	7.82636	2.19295
chr1	135175111	135175664	merged_common_peak	128	158	-0.151066	7.23735	0.463417
chr1	135182412	135182924	merged_common_peak	158	117	0.613797	7.18954	3.30909
chr1	135184228	135185006	merged_common_peak	253	199	0.602242	7.94498	5.09575
chr1	135206168	135207420	unique_peak2	108	132	-0.16307	6.97375	0.447302
chr1	135243927	135244821	merged_common_peak	93	114	-0.190216	6.75038	0.471822
chr1	135257966	135261269	merged_common_peak	590	723	0.0977299	9.54871	0.693075
chr1	135268040	135269417	merged_common_peak	267	312	0.0419431	8.31099	0.335282
chr1	135272246	135273085	unique_peak2	174	213	-0.0915815	7.69568	0.37657
chr1	135311570	135312169	merged_common_peak	119	86	0.603134	6.74451	2.42468
chr1	135327704	135328111	merged_common_peak	83	62	0.497988	6.22627	1.35504
chr1	135514881	135515349	merged_common_peak	118	96	0.432773	6.8163	1.47755
chr1	135542089	135542903	unique_peak2	72	118	-0.644172	6.57273	2.29122
chr1	135547380	135547604	unique_peak2	11	11	-0.223858	3.47303	0.311374
chr1	135560942	135562043	merged_common_peak	429	530	0.0360429	9.07059	0.340659
chr1	135578155	135578905	merged_common_peak	146	160	0.0399398	7.35089	0.325011
chr1	135592273	135592779	unique_peak2	64	65	0.0204935	6.05464	0.30761
chr1	135607017	135607475	unique_peak2	26	70	-1.49086	5.40432	5.1205
chr1	135609247	135609829	unique_peak2	58	78	-0.393888	6.10684	0.81231
chr1	135779108	135779461	unique_peak2	38	33	0.159918	5.16742	0.377554
chr1	135805181	135805641	merged_common_peak	103	148	-0.402104	7.01812	1.32328
chr1	135830440	135831694	merged_common_peak	928	1469	-0.200192	10.4215	3.12491
chr1	135862617	135862962	unique_peak2	27	36	-0.492364	4.96327	0.652802
chr1	135961849	135962424	unique_peak2	52	86	-0.704683	6.0906	2.01863
chr1	135988854	135990509	unique_peak2	177	257	-0.334139	7.84416	1.57465
chr1	135995290	135996284	merged_common_peak	267	353	-0.135644	8.39978	0.610292
chr1	136069642	136069978	unique_peak2	28	52	-0.954672	5.25058	2.04885
chr1	136117345	136118164	merged_common_peak	236	241	0.216371	8.02705	0.967268
chr1	136118611	136119836	merged_common_peak	247	250	0.236297	8.08969	1.14357
chr1	136138833	136139268	merged_common_peak	97	153	-0.544821	6.99438	2.16337
chr1	136236745	136237182	merged_common_peak	142	190	-0.250723	7.45207	0.821911
chr1	136257666	136259068	merged_common_peak	470	625	-0.0556582	9.26219	0.394655
chr1	136283467	136283669	merged_common_peak	1	3	-1.50636	1.24682	0.90309
chr1	136315993	136316474	merged_common_peak	102	115	-0.0563793	6.82979	0.30964
chr1	136393308	136393533	unique_peak2	5	5	-0.333145	2.41839	0.909929
chr1	136415245	136415820	unique_peak2	72	78	-0.0531355	6.27721	0.30667
chr1	136453306	136453963	merged_common_peak	122	173	-0.357349	7.26427	1.2654
chr1	136477106	136477432	unique_peak1	32	12	1.27959	4.34024	2.34941
chr1	136610024	136610458	merged_common_peak	79	72	0.207362	6.29351	0.501672
chr1	136771811	136772230	merged_common_peak	153	189	-0.12455	7.50758	0.435664
chr1	137020061	137020465	merged_common_peak	55	114	-1.01911	6.33593	4.50684
chr1	137065986	137066801	merged_common_peak	632	660	0.338941	9.53798	4.80768
chr1	137078007	137078409	unique_peak1	69	55	0.376132	5.99542	0.85251
chr1	137092521	137092867	merged_common_peak	66	134	-0.963428	6.5951	4.90105
chr1	137107052	137107489	merged_common_peak	86	99	-0.112429	6.58764	0.341752
chr1	137897723	137898493	merged_common_peak	106	135	-0.224888	6.97502	0.61364
chr1	137904586	137905004	unique_peak2	32	42	-0.446231	5.20315	0.595372
chr1	137910106	137910485	unique_peak2	42	47	-0.181324	5.4943	0.362059
chr1	137972686	137973035	unique_peak2	37	55	-0.601544	5.50658	1.07072
chr1	138131059	138131447	merged_common_peak	78	91	-0.146507	6.45031	0.380928
chr1	138339343	138339865	merged_common_peak	213	251	-0.00541727	7.97457	0.30103
chr1	138402647	138403287	merged_common_peak	170	175	0.15345	7.53616	0.559286
chr1	138421489	138421994	merged_common_peak	133	159	-0.0992535	7.2723	0.371545
chr1	138437885	138439013	merged_common_peak	329	369	0.133625	8.59819	0.684756
chr1	138456551	138456826	unique_peak2	23	23	-0.11457	4.52768	0.305856
chr1	138466177	138466606	merged_common_peak	83	99	-0.168588	6.55956	0.416588
chr1	138511572	138512072	merged_common_peak	90	77	0.317963	6.44438	0.801324
chr1	138529407	138529986	merged_common_peak	137	139	0.140464	7.19952	0.467854
chr1	138561693	138562446	merged_common_peak	197	185	0.308341	7.69333	1.36269
chr1	138582964	138583556	merged_common_peak	103	101	0.144639	6.74474	0.447224
chr1	138589714	138590330	unique_peak2	61	119	-0.917625	6.44808	3.94658
chr1	138595071	138595679	merged_common_peak	139	147	0.0833213	7.25111	0.372473
chr1	138738428	138739509	merged_common_peak	240	167	0.769702	7.77717	7.16947
chr1	138745457	138745936	unique_peak1	96	43	1.24612	6.08249	5.9674
chr1	138771846	138772344	merged_common_peak	113	102	0.277489	6.82525	0.807939
chr1	138792357	138792964	merged_common_peak	299	307	0.245689	8.38963	1.38941
chr1	138806660	138807248	merged_common_peak	230	333	-0.289507	8.23895	1.59313
chr1	138807908	138808649	merged_common_peak	256	285	0.105018	8.21238	0.49479
chr1	138822115	138823147	merged_common_peak	188	202	0.107715	7.71919	0.450134
chr1	138826239	138826770	merged_common_peak	149	164	0.0368661	7.38476	0.317333
chr1	138854251	138854701	merged_common_peak	132	169	-0.198704	7.31004	0.603339
chr1	138855791	138856745	merged_common_peak	217	212	0.26679	7.8681	1.20064
chr1	138856988	138857721	unique_peak2	116	155	-0.279842	7.14548	0.861247
chr1	138862578	138864078	merged_common_peak	265	301	0.0815694	8.27919	0.427282
chr1	138867476	138868080	merged_common_peak	225	236	0.170434	7.97396	0.716161
chr1	138906802	138907649	merged_common_peak	84	82	0.119168	6.43462	0.381858
chr1	138917113	138917626	merged_common_peak	79	60	0.466449	6.16396	1.17369
chr1	138930886	138931718	merged_common_peak	120	139	-0.0699243	7.09432	0.329772
chr1	139068294	139069153	merged_common_peak	111	121	0.00492659	6.9332	0.301924
chr1	139177083	139177251	unique_peak2	4	2	0.375074	1.7725	0.931119
chr1	140398126	140398536	merged_common_peak	94	127	-0.327791	6.8361	0.894864
chr1	140464990	140465416	merged_common_peak	78	110	-0.41736	6.58574	1.12394
chr1	140505892	140506416	merged_common_peak	101	98	0.156632	6.70767	0.451446
chr1	140515544	140516566	merged_common_peak	327	483	-0.263585	8.78707	1.87173
chr1	140808858	140809258	unique_peak2	46	42	0.119722	5.48613	0.362059
chr1	140825098	140826087	merged_common_peak	412	511	0.0240561	9.01203	0.322072
chr1	140918648	140918967	unique_peak2	19	35	-0.991314	4.67427	1.50629
chr1	140928973	140929402	unique_peak2	41	50	-0.306445	5.5192	0.494631
chr1	141074564	141074968	merged_common_peak	55	42	0.400112	5.62632	0.796452
chr1	141397703	141398366	merged_common_peak	388	432	0.170022	8.84323	1.01622
chr1	141445076	141445534	unique_peak1	63	27	1.23272	5.42372	3.96463
chr1	141447890	141448395	merged_common_peak	100	73	0.560768	6.48984	1.85755
chr1	141456580	141457114	merged_common_peak	280	323	0.0679175	8.37381	0.395694
chr1	141557351	141557833	merged_common_peak	195	174	0.380041	7.64123	1.88093
chr1	141677617	141678053	merged_common_peak	223	167	0.652634	7.71863	5.08234
chr1	141705138	141705627	merged_common_peak	74	111	-0.513454	6.55063	1.55865
chr1	141910004	141910374	unique_peak1	50	34	0.547418	5.40299	1.04433
chr1	141915320	141915826	merged_common_peak	211	233	0.0864709	7.9136	0.402623
chr1	141977593	141978062	merged_common_peak	122	106	0.344128	6.91353	1.11068
chr1	142026259	142026715	merged_common_peak	129	161	-0.165675	7.25701	0.506893
chr1	142077432	142078026	unique_peak2	84	114	-0.351283	6.66985	0.915574
chr1	142079653	142080329	merged_common_peak	177	178	0.193272	7.58045	0.71469
chr1	142277531	142278196	merged_common_peak	377	633	-0.426001	9.09534	5.41303
chr1	142303154	142303853	merged_common_peak	184	229	-0.106673	7.79215	0.41134
chr1	142311885	142312779	merged_common_peak	150	187	-0.140767	7.48421	0.45636
chr1	145405213	145405937	merged_common_peak	88	104	-0.146445	6.64102	0.389447
chr1	145443939	145444333	unique_peak2	15	39	-1.50043	4.57171	2.96631
chr1	145478555	145478933	merged_common_peak	41	83	-1.02634	5.87915	3.45208
chr1	145510295	145510756	merged_common_peak	87	112	-0.270462	6.68495	0.642998
chr1	145528191	145528620	merged_common_peak	60	82	-0.411796	6.16914	0.906171
chr1	145793721	145794449	merged_common_peak	537	924	-0.4061	9.65026	7.16119
chr1	145799962	145800354	unique_peak1	49	35	0.475084	5.40747	0.878853
chr1	146044778	146045162	merged_common_peak	41	39	0.0440526	5.34395	0.311888
chr1	147841971	147842407	unique_peak1	52	7	2.73826	4.36913	8.97606
chr1	148748805	148749163	unique_peak1	37	20	0.813493	4.79906	1.41894
chr1	149425450	149425728	unique_peak2	17	25	-0.690444	4.35522	0.733542
chr1	152239581	152240754	unique_peak2	103	129	-0.205304	6.91972	0.530907
chr1	152251340	152252091	merged_common_peak	173	166	0.25701	7.51221	0.987873
chr1	152313212	152313638	merged_common_peak	262	382	-0.279378	8.44151	1.6582
chr1	152516299	152516730	merged_common_peak	121	106	0.331063	6.907	1.06063
chr1	152866604	152867029	merged_common_peak	60	90	-0.544552	6.23552	1.42747
chr1	152872242	152872878	merged_common_peak	96	117	-0.177092	6.7941	0.46718
chr1	152886251	152886706	merged_common_peak	63	74	-0.188743	6.13445	0.400351
chr1	152926010	152926445	merged_common_peak	251	324	-0.110849	8.28887	0.484865
chr1	152975030	152975688	merged_common_peak	1003	1207	0.207254	10.342	3.2532
chr1	153000152	153000977	merged_common_peak	392	514	-0.0638113	8.97652	0.396133
chr1	153013142	153013645	unique_peak1	71	62	0.251291	6.10293	0.569301
chr1	153024732	153025342	merged_common_peak	161	176	0.0587484	7.49698	0.339637
chr1	153065395	153066134	merged_common_peak	335	246	0.745476	8.32111	9.69001
chr1	153111508	153112386	merged_common_peak	236	211	0.407314	7.93158	2.47103
chr1	153117679	153118123	merged_common_peak	61	62	0.0119859	5.98327	0.307924
chr1	153136285	153136963	merged_common_peak	62	55	0.207517	5.91111	0.482196
chr1	153143552	153144147	unique_peak1	117	49	1.37532	6.33152	8.55695
chr1	153172552	153172940	merged_common_peak	108	150	-0.346192	7.06531	1.07851
chr1	153189956	153190414	unique_peak2	89	108	-0.182503	6.67693	0.454399
chr1	153237228	153237456	unique_peak2	4	4	-0.361892	2.14098	0.864172
chr1	153330788	153331377	merged_common_peak	78	62	0.399776	6.17717	0.963785
chr1	153336930	153337297	merged_common_peak	45	77	-0.773834	5.89849	2.01604
chr1	153553217	153553579	unique_peak2	39	47	-0.297064	5.43643	0.462862
chr1	153555988	153556632	merged_common_peak	180	126	0.715151	7.34626	4.71759
chr1	153600118	153600543	merged_common_peak	64	84	-0.344503	6.23714	0.717512
chr1	154079185	154079448	merged_common_peak	22	19	0.0803531	4.3621	0.322754
chr1	154233028	154233962	unique_peak2	67	88	-0.338637	6.30642	0.747288
chr1	154245209	154246385	merged_common_peak	796	824	0.387896	9.8822	7.74326
chr1	154257755	154258215	unique_peak1	59	36	0.727337	5.57312	1.71609
chr1	154291743	154292582	unique_peak1	76	48	0.721308	5.97536	2.15469
chr1	154344669	154345243	merged_common_peak	103	114	-0.0284258	6.83128	0.301987
chr1	154643102	154643596	merged_common_peak	72	194	-1.35669	6.92899	11.8863
chr1	154751473	154752009	merged_common_peak	79	96	-0.202727	6.49855	0.474877
chr1	154912275	154912639	unique_peak2	37	63	-0.794189	5.60291	1.78595
chr1	154912895	154913843	merged_common_peak	95	128	-0.32226	6.8501	0.889702
chr1	155114776	155115354	unique_peak2	54	76	-0.469246	6.03216	0.961593
chr1	155404119	155404372	unique_peak2	21	11	0.74618	3.95805	0.876667
chr1	155485332	155485817	merged_common_peak	88	142	-0.592071	6.86384	2.33847
chr1	155507265	155507661	unique_peak2	61	85	-0.436999	6.20777	0.945872
chr1	155508396	155509379	merged_common_peak	203	257	-0.115952	7.95325	0.459433
chr1	155516716	155517489	merged_common_peak	115	164	-0.374499	7.17907	1.32536
chr1	155525955	155527413	merged_common_peak	622	679	0.272573	9.54568	3.22444
chr1	155537859	155538923	merged_common_peak	177	168	0.276208	7.53898	1.09932
chr1	155539460	155540192	merged_common_peak	134	186	-0.312321	7.39073	1.09179
chr1	155548441	155549444	merged_common_peak	430	639	-0.2296	9.20713	1.88756
chr1	155549447	155550138	merged_common_peak	339	453	-0.113766	8.76967	0.571969
chr1	155577714	155578153	unique_peak2	49	107	-1.10988	6.19995	4.89906
chr1	155709696	155710183	unique_peak2	29	46	-0.727086	5.19105	1.26139
chr1	155757115	155757907	merged_common_peak	84	133	-0.571882	6.78015	2.11283
chr1	155765759	155766337	unique_peak2	54	68	-0.310984	5.95303	0.553596
chr1	155832709	155833327	merged_common_peak	206	223	0.111284	7.863	0.469658
chr1	155835385	155835962	merged_common_peak	287	374	-0.103601	8.49895	0.488781
chr1	155839399	155840067	merged_common_peak	129	201	-0.484036	7.41619	2.3554
chr1	155844848	155845277	merged_common_peak	107	59	0.970572	6.39218	4.65442
chr1	155880833	155881727	merged_common_peak	757	1003	0.0243105	9.9837	0.335791
chr1	155964379	155964912	unique_peak2	74	82	-0.0811384	6.33447	0.322747
chr1	155995871	155996598	merged_common_peak	185	280	-0.386982	7.94094	2.15982
chr1	155996966	155998108	merged_common_peak	356	590	-0.41615	8.99894	4.85892
chr1	156029495	156030235	merged_common_peak	71	73	0.0191176	6.21901	0.306899
chr1	156121328	156121575	unique_peak2	6	17	-1.67141	3.33422	1.49152
chr1	156921895	156922500	merged_common_peak	308	406	-0.109104	8.61433	0.534316
chr1	156931044	156931571	unique_peak1	89	80	0.245832	6.46277	0.617317
chr1	157046644	157047162	merged_common_peak	135	164	-0.119938	7.30635	0.400007
chr1	157122902	157123914	merged_common_peak	364	444	0.0286693	8.812	0.325212
chr1	157169282	157169639	unique_peak2	30	57	-0.978003	5.36898	2.31715
chr1	157209668	157209888	unique_peak2	11	6	0.55375	3.08423	1.21399
chr1	157263586	157264507	merged_common_peak	86	84	0.122036	6.47041	0.400445
chr1	157285502	157285919	merged_common_peak	69	54	0.402128	5.98242	0.920599
chr1	157416433	157416776	unique_peak2	33	50	-0.644616	5.35012	1.0625
chr1	157423531	157423887	merged_common_peak	81	114	-0.408787	6.6411	1.09098
chr1	157430595	157430890	unique_peak2	12	13	-0.318153	3.64828	0.337263
chr1	157642819	157643256	unique_peak2	64	96	-0.535025	6.3324	1.42739
chr1	157656662	157657589	merged_common_peak	365	360	0.334854	8.66328	2.71111
chr1	157673006	157674512	merged_common_peak	546	848	-0.255861	9.60169	2.91867
chr1	157690644	157691064	merged_common_peak	122	162	-0.263133	7.21716	0.794246
chr1	157702424	157703050	merged_common_peak	144	181	-0.158861	7.42836	0.505646
chr1	157733795	157734367	unique_peak1	76	45	0.812456	5.92979	2.56597
chr1	157817792	157818108	unique_peak2	32	39	-0.341894	5.15098	0.451136
chr1	157882669	157884053	merged_common_peak	232	251	0.130714	8.04264	0.558654
chr1	157889071	157889993	merged_common_peak	185	144	0.567536	7.46368	3.37036
chr1	158113423	158114085	merged_common_peak	145	182	-0.155767	7.43782	0.504462
chr1	158114228	158114835	merged_common_peak	194	238	-0.0778003	7.86197	0.368428
chr1	158388783	158389256	merged_common_peak	91	122	-0.321659	6.78169	0.870694
chr1	158435937	158436476	merged_common_peak	187	308	-0.506902	8.01801	3.74353
chr1	158587475	158588221	unique_peak1	153	105	0.717385	7.08661	4.04527
chr1	158588695	158589345	merged_common_peak	130	127	0.186438	7.09322	0.588406
chr1	158606276	158606729	merged_common_peak	98	90	0.230418	6.623	0.619983
chr1	158749260	158749920	merged_common_peak	233	168	0.713968	7.75786	6.15803
chr1	158772488	158773093	merged_common_peak	129	127	0.174175	7.08709	0.532752
chr1	158791854	158792203	unique_peak2	31	32	-0.113606	4.98759	0.304477
chr1	158868912	158869381	unique_peak2	44	60	-0.454343	5.70357	0.767941
chr1	158908583	158909319	merged_common_peak	316	341	0.182834	8.50927	0.959481
chr1	158931170	158931622	unique_peak2	42	129	-1.61873	6.213	10.3774
chr1	158941270	158942049	unique_peak1	145	122	0.417418	7.15122	1.64521
chr1	158942426	158943899	merged_common_peak	321	420	-0.0919444	8.6717	0.46758
chr1	159003651	159004323	merged_common_peak	216	167	0.601824	7.69323	4.31523
chr1	159219421	159219708	merged_common_peak	32	33	-0.107429	5.03375	0.304371
chr1	159449589	159449942	unique_peak2	31	41	-0.46153	5.16155	0.603601
chr1	159455206	159457811	merged_common_peak	623	734	0.16293	9.60307	1.40634
chr1	159524735	159525311	merged_common_peak	59	46	0.382201	5.74569	0.759156
chr1	160861735	160862446	merged_common_peak	256	135	1.17743	7.67618	15.3691
chr1	160898561	160899107	merged_common_peak	281	246	0.465085	8.18091	3.65435
chr1	161054782	161055274	merged_common_peak	101	62	0.808708	6.38163	3.24878
chr1	161180426	161180882	merged_common_peak	94	93	0.11762	6.6134	0.391262
chr1	161976899	161977365	merged_common_peak	95	144	-0.490942	6.93444	1.78572
chr1	162303337	162303847	merged_common_peak	132	163	-0.146865	7.28412	0.458191
chr1	162304540	162305285	merged_common_peak	165	197	-0.0639674	7.59737	0.337036
chr1	162374690	162375134	merged_common_peak	63	68	-0.0684492	6.0743	0.307512
chr1	162519253	162519632	unique_peak1	37	21	0.746379	4.83262	1.27202
chr1	162622824	162623678	merged_common_peak	491	504	0.32403	9.14215	3.4395
chr1	162715690	162716852	merged_common_peak	279	355	-0.0736714	8.4389	0.391595
chr1	162722013	162722726	unique_peak1	87	77	0.264315	6.41756	0.668628
chr1	162837004	162837713	merged_common_peak	101	109	0.00462853	6.78367	0.302022
chr1	162911405	162911987	merged_common_peak	153	188	-0.116937	7.50377	0.418631
chr1	162916952	162917782	merged_common_peak	405	449	0.182918	8.90524	1.17113
chr1	162963921	162965025	merged_common_peak	187	192	0.172104	7.67851	0.633063
chr1	163000392	163001145	merged_common_peak	103	127	-0.182936	6.90853	0.478468
chr1	163006016	163006645	unique_peak2	53	91	-0.755387	6.14587	2.37405
chr1	163044720	163045083	unique_peak2	26	50	-1.01354	5.16566	2.14569
chr1	163126055	163126631	merged_common_peak	354	569	-0.372945	8.96835	3.89217
chr1	163174882	163175492	merged_common_peak	201	176	0.411903	7.67356	2.14655
chr1	163179485	163181964	merged_common_peak	474	611	-0.00949337	9.25264	0.302633
chr1	163187787	163188824	merged_common_peak	168	180	0.0942073	7.54695	0.399436
chr1	163196907	163197454	merged_common_peak	116	164	-0.360762	7.18594	1.26726
chr1	163199022	163199794	merged_common_peak	155	113	0.633066	7.14942	3.39344
chr1	163260693	163261296	merged_common_peak	86	107	-0.223461	6.64316	0.514008
chr1	163308606	163309660	merged_common_peak	369	834	-0.857528	9.27687	23.9641
chr1	163643016	163643408	unique_peak2	40	39	0.00548775	5.32467	0.303779
chr1	163680666	163681183	merged_common_peak	99	98	0.12494	6.69183	0.406483
chr1	163881504	163881948	merged_common_peak	77	56	0.523778	6.09478	1.37112
chr1	163906351	163906914	merged_common_peak	174	223	-0.157469	7.72862	0.549017
chr1	163935184	163935695	merged_common_peak	79	84	-0.0122049	6.40329	0.30103
chr1	163967909	163968415	merged_common_peak	214	279	-0.149959	8.0543	0.599276
chr1	164177396	164178033	merged_common_peak	83	97	-0.139442	6.54499	0.37577
chr1	164501469	164501889	merged_common_peak	63	87	-0.419356	6.24975	0.928905
chr1	164573880	164574400	merged_common_peak	183	282	-0.414515	7.9374	2.46219
chr1	164595224	164595586	unique_peak2	34	54	-0.70716	5.42778	1.29674
chr1	164770128	164770737	merged_common_peak	158	215	-0.258448	7.62566	0.935706
chr1	164783536	164784462	unique_peak2	107	134	-0.199353	6.97714	0.521772
chr1	164796394	164797046	merged_common_peak	126	198	-0.499814	7.38672	2.3921
chr1	164805068	164805671	merged_common_peak	162	309	-0.739922	7.90616	7.00788
chr1	164822097	164822691	merged_common_peak	66	167	-1.27893	6.75285	9.41111
chr1	164826991	164827517	unique_peak2	41	93	-1.18861	5.96028	4.80006
chr1	164827918	164828981	merged_common_peak	179	313	-0.599652	7.99479	5.02613
chr1	164846815	164847268	unique_peak2	25	55	-1.20887	5.20292	3.01488
chr1	164893647	164894363	merged_common_peak	172	172	0.196862	7.53306	0.698091
chr1	164896224	164897022	merged_common_peak	178	192	0.0935964	7.63926	0.407989
chr1	164899565	164900239	merged_common_peak	98	178	-0.745603	7.11101	4.18262
chr1	164906147	164906458	merged_common_peak	15	19	-0.500428	4.07171	0.466171
chr1	164916039	164917231	unique_peak2	144	207	-0.351506	7.52469	1.43993
chr1	164917567	164918336	merged_common_peak	284	337	0.0295084	8.41563	0.321408
chr1	165246801	165247261	merged_common_peak	58	68	-0.198632	6.00921	0.409674
chr1	165268856	165269619	merged_common_peak	134	110	0.440157	7.01449	1.7054
chr1	166084841	166085611	merged_common_peak	295	334	0.102977	8.43951	0.512595
chr1	166092693	166093701	merged_common_peak	340	429	-0.0307105	8.73284	0.31738
chr1	166098937	166099339	unique_peak2	42	76	-0.863149	5.83521	2.4588
chr1	166138358	166138997	merged_common_peak	104	120	-0.0864844	6.87562	0.334441
chr1	166150192	166150805	unique_peak2	69	62	0.206207	6.08038	0.495874
chr1	166165112	166165693	merged_common_peak	189	198	0.144872	7.70906	0.55258
chr1	166182452	166183180	merged_common_peak	221	226	0.20405	7.92857	0.847713
chr1	166237159	166238207	merged_common_peak	88	98	-0.0615562	6.59858	0.311156
chr1	166254138	166254827	merged_common_peak	232	274	0.00470566	8.10564	0.302609
chr1	166266075	166266558	merged_common_peak	94	196	-0.949843	7.14713	6.85093
chr1	166345250	166346177	merged_common_peak	172	194	0.02416	7.61941	0.309893
chr1	166356324	166357110	merged_common_peak	103	98	0.187708	6.72321	0.532781
chr1	166389336	166390049	merged_common_peak	119	189	-0.523778	7.30797	2.51058
chr1	166404357	166404758	merged_common_peak	58	67	-0.17757	5.99868	0.384854
chr1	166411741	166412089	unique_peak2	44	55	-0.330961	5.64187	0.518541
chr1	166412925	166413400	merged_common_peak	118	209	-0.68156	7.37347	4.22151
chr1	166422888	166423607	merged_common_peak	152	225	-0.385299	7.62753	1.78055
chr1	166451150	166452139	merged_common_peak	599	762	0.0462239	9.59865	0.395739
chr1	166456802	166457166	unique_peak2	30	37	-0.367949	5.06395	0.512116
chr1	166561813	166562195	unique_peak2	38	72	-0.942444	5.7186	2.62085
chr1	166633612	166634246	merged_common_peak	211	155	0.671433	7.62112	5.00361
chr1	166634574	166635437	merged_common_peak	220	266	-0.0373229	8.04203	0.315892
chr1	166643842	166644766	merged_common_peak	626	767	0.107244	9.63858	0.791566
chr1	166717888	166718459	merged_common_peak	73	65	0.228025	6.15841	0.521498
chr1	166830049	166830655	unique_peak2	60	106	-0.778224	6.35236	2.83282
chr1	167130517	167130909	unique_peak1	80	46	0.862478	5.98583	2.86089
chr1	167159601	167160171	merged_common_peak	108	104	0.177967	6.80323	0.52029
chr1	167229634	167230095	merged_common_peak	51	50	0.0353515	5.6901	0.309546
chr1	167258770	167259469	merged_common_peak	314	348	0.143475	8.51882	0.706761
chr1	167278702	167279182	merged_common_peak	72	55	0.44329	6.029	1.0352
chr1	167351522	167352282	merged_common_peak	501	543	0.248908	9.21192	2.24098
chr1	167390298	167392419	merged_common_peak	424	528	0.0227691	9.05851	0.317546
chr1	167394778	167395100	unique_peak2	43	59	-0.466461	5.67366	0.848284
chr1	167399901	167400321	merged_common_peak	75	108	-0.453086	6.54164	1.20996
chr1	167414560	167415503	merged_common_peak	262	305	0.0444346	8.27961	0.343343
chr1	167432913	167434500	merged_common_peak	463	665	-0.168981	9.29489	1.22214
chr1	167440185	167440753	merged_common_peak	76	98	-0.293338	6.48269	0.652149
chr1	167524829	167525523	unique_peak2	59	70	-0.212957	6.04327	0.435402
chr1	167538886	167539666	merged_common_peak	421	546	-0.0368407	9.07698	0.335042
chr1	167545964	167547743	merged_common_peak	401	471	0.0982104	8.93175	0.558277
chr1	167572340	167573868	unique_peak1	150	114	0.568332	7.12966	2.79328
chr1	167690502	167691104	merged_common_peak	412	410	0.341062	8.85353	3.18164
chr1	167699273	167699719	merged_common_peak	89	93	0.0310929	6.57014	0.311371
chr1	167747312	167747829	unique_peak1	58	44	0.41804	5.70087	0.837675
chr1	167932949	167933554	unique_peak2	79	102	-0.289314	6.54184	0.679879
chr1	168196344	168196863	unique_peak2	33	43	-0.431622	5.24362	0.58758
chr1	168208840	168209343	unique_peak1	99	61	0.800101	6.35425	3.17713
chr1	168209765	168210195	unique_peak2	58	66	-0.156196	5.98799	0.363096
chr1	168222891	168223642	merged_common_peak	127	151	-0.0985648	7.19865	0.36107
chr1	168290282	168290762	merged_common_peak	153	152	0.187918	7.35135	0.623666
chr1	168308619	168309296	merged_common_peak	116	122	0.0630454	6.97404	0.332302
chr1	169236491	169237332	merged_common_peak	138	115	0.423322	7.06964	1.65317
chr1	169249928	169250793	merged_common_peak	214	92	1.44016	7.25924	17.1007
chr1	169251886	169252157	unique_peak2	13	17	-0.562123	3.88886	0.489165
chr1	169280127	169281057	merged_common_peak	147	138	0.262766	7.25032	0.900692
chr1	169284343	169285066	unique_peak2	116	123	0.0513636	6.97988	0.32266
chr1	169304636	169305520	merged_common_peak	135	208	-0.460975	7.47687	2.20033
chr1	169307991	169308498	merged_common_peak	130	165	-0.188601	7.28074	0.553245
chr1	169317350	169317979	merged_common_peak	235	305	-0.12892	8.19293	0.533096
chr1	169548084	169548801	merged_common_peak	71	63	0.228571	6.11429	0.527905
chr1	169712172	169712674	merged_common_peak	296	328	0.134448	8.42917	0.644374
chr1	170221293	170221881	merged_common_peak	77	94	-0.213187	6.46326	0.478834
chr1	170235598	170236083	merged_common_peak	93	75	0.407346	6.4516	1.13813
chr1	170296397	170296746	unique_peak2	35	40	-0.238268	5.23842	0.373466
chr1	170367865	170368228	merged_common_peak	43	84	-0.968961	5.92491	3.22737
chr1	170402642	170403155	merged_common_peak	81	84	0.0273123	6.42305	0.312459
chr1	170405756	170406023	merged_common_peak	23	37	-0.777535	4.85916	1.13829
chr1	170427895	170428400	merged_common_peak	127	83	0.757045	6.77084	3.70014
chr1	170432264	170432753	merged_common_peak	64	113	-0.768002	6.44889	2.88225
chr1	170466426	170466851	unique_peak2	40	116	-1.54295	6.09889	8.6938
chr1	170613253	170613566	unique_peak2	31	48	-0.683922	5.27275	1.10165
chr1	171096092	171097049	merged_common_peak	380	414	0.198022	8.79598	1.23967
chr1	171117730	171118315	merged_common_peak	192	255	-0.193432	7.90328	0.736989
chr1	171389543	171389843	unique_peak2	13	19	-0.714126	3.96486	0.647241
chr1	171461403	171462197	merged_common_peak	85	86	0.0699819	6.47793	0.331705
chr1	171851720	171852426	unique_peak1	80	53	0.662179	6.08598	1.92709
chr1	171965069	171965629	merged_common_peak	185	117	0.864802	7.31504	6.67716
chr1	172150422	172150922	merged_common_peak	69	75	-0.0644402	6.21571	0.306899
chr1	172222524	172223277	merged_common_peak	144	172	-0.0856947	7.39178	0.353541
chr1	172254985	172255897	merged_common_peak	704	1318	-0.485378	10.1225	13.9482
chr1	172273981	172274363	merged_common_peak	41	51	-0.334459	5.53321	0.537527
chr1	172358116	172358786	merged_common_peak	172	161	0.29164	7.48567	1.13057
chr1	172371977	172372296	merged_common_peak	35	57	-0.738697	5.48863	1.45456
chr1	172386315	172387225	merged_common_peak	245	220	0.40698	7.99139	2.56441
chr1	172389992	172390496	merged_common_peak	103	96	0.217151	6.70849	0.601628
chr1	172419663	172420142	unique_peak2	63	65	-0.00431882	6.04223	0.302688
chr1	172425833	172426888	merged_common_peak	275	365	-0.136665	8.44737	0.619707
chr1	172431451	172432141	unique_peak2	95	165	-0.686073	7.032	3.44403
chr1	172446073	172447004	merged_common_peak	593	643	0.274762	9.4683	3.12979
chr1	172519729	172520474	unique_peak2	85	100	-0.145286	6.58557	0.393153
chr1	172520685	172521139	merged_common_peak	81	62	0.459423	6.20699	1.21621
chr1	172537287	172538570	merged_common_peak	364	193	1.22642	8.21312	23.8283
chr1	172538597	172539105	merged_common_peak	191	164	0.431932	7.58229	2.26187
chr1	172553066	172553569	merged_common_peak	47	42	0.153415	5.50297	0.387953
chr1	172619914	172620254	unique_peak2	34	40	-0.283352	5.21588	0.406785
chr1	172624716	172625241	unique_peak1	130	86	0.743495	6.81469	3.70916
chr1	172627066	172627629	merged_common_peak	210	193	0.349356	7.77459	1.74376
chr1	172684663	172685204	merged_common_peak	94	76	0.405422	6.4695	1.12866
chr1	172691596	172692139	merged_common_peak	210	178	0.465453	7.71654	2.74439
chr1	172732791	172733236	merged_common_peak	99	198	-0.882328	7.19546	6.13493
chr1	172745428	172746196	merged_common_peak	119	106	0.304611	6.89377	0.919034
chr1	172798595	172799129	merged_common_peak	117	173	-0.423763	7.23106	1.63061
chr1	172810180	172810931	merged_common_peak	83	96	-0.124645	6.53759	0.358558
chr1	172902935	172903442	merged_common_peak	153	339	-0.964085	7.92735	12.0325
chr1	172987385	172987821	merged_common_peak	155	290	-0.71892	7.82542	6.29774
chr1	173020928	173021271	unique_peak2	37	42	-0.220454	5.31604	0.369793
chr1	173031776	173033473	merged_common_peak	212	179	0.472514	7.72811	2.86441
chr1	173053037	173053544	merged_common_peak	159	287	-0.663452	7.8382	5.44913
chr1	173098887	173099508	merged_common_peak	152	156	0.140259	7.36475	0.491861
chr1	173133560	173134122	merged_common_peak	160	168	0.115565	7.45866	0.440269
chr1	173134338	173134977	merged_common_peak	190	161	0.450047	7.56487	2.35594
chr1	173143007	173143365	unique_peak2	53	67	-0.319288	5.92782	0.604904
chr1	173154674	173155646	merged_common_peak	672	851	0.0708003	9.77011	0.541833
chr1	173162435	173163645	merged_common_peak	192	192	0.214111	7.69951	0.836075
chr1	173176998	173177666	merged_common_peak	92	102	-0.0483432	6.66233	0.30533
chr1	173185951	173186856	merged_common_peak	237	250	0.170429	8.05676	0.71925
chr1	173211228	173212020	merged_common_peak	116	130	-0.0278631	7.01949	0.304397
chr1	173274426	173275351	merged_common_peak	159	150	0.268069	7.37244	0.971826
chr1	173348871	173349328	merged_common_peak	70	75	-0.0417396	6.22706	0.302487
chr1	173354866	173355610	merged_common_peak	130	150	-0.0519663	7.21242	0.312768
chr1	173432547	173434467	merged_common_peak	299	351	0.0530441	8.48595	0.360476
chr1	173495880	173496417	merged_common_peak	87	99	-0.0941392	6.59679	0.329161
chr1	174029640	174030213	merged_common_peak	70	87	-0.253244	6.33281	0.529215
chr1	174147268	174147636	unique_peak2	21	40	-1.02641	4.84435	1.77675
chr1	174237867	174238501	merged_common_peak	164	243	-0.375018	7.74323	1.82925
chr1	174239838	174240776	merged_common_peak	164	232	-0.308467	7.70995	1.30381
chr1	174306326	174306707	unique_peak2	43	44	-0.0514235	5.46614	0.303526
chr1	174430681	174431182	unique_peak2	35	67	-0.968179	5.60337	2.51827
chr1	174562458	174563550	merged_common_peak	156	239	-0.430709	7.69154	2.24566
chr1	174581620	174583028	merged_common_peak	334	408	0.0131157	8.68251	0.307642
chr1	174615242	174615709	merged_common_peak	46	69	-0.583297	5.83763	1.21257
chr1	174627490	174628615	merged_common_peak	145	158	0.0470497	7.33641	0.325309
chr1	174640069	174640473	merged_common_peak	78	64	0.354688	6.19971	0.835791
chr1	174715983	174716566	merged_common_peak	77	53	0.601781	6.05578	1.66438
chr1	174757719	174758171	unique_peak2	48	107	-1.14221	6.18378	5.09794
chr1	174833352	174834007	merged_common_peak	229	337	-0.313625	8.24407	1.81038
chr1	174861628	174862007	unique_peak2	43	61	-0.513767	5.69731	0.980946
chr1	174862284	174862826	merged_common_peak	209	256	-0.0639583	7.97365	0.344289
chr1	175328810	175329077	unique_peak2	13	7	0.607802	3.3039	1.31827
chr1	176498621	176499241	merged_common_peak	395	385	0.36433	8.77462	3.3977
chr1	176500040	176500519	merged_common_peak	194	203	0.150641	7.74775	0.568923
chr1	176662720	176663325	unique_peak1	59	38	0.651388	5.6111	1.47201
chr1	176672719	176673288	merged_common_peak	184	204	0.0593373	7.70915	0.352984
chr1	176678579	176679319	merged_common_peak	114	105	0.250046	6.85294	0.716157
chr1	176701950	176702601	merged_common_peak	296	211	0.768471	8.11216	8.94336
chr1	176815560	176816115	merged_common_peak	44	48	-0.138315	5.54555	0.322048
chr1	176830938	176831268	unique_peak2	23	40	-0.88716	4.91397	1.4523
chr1	176837602	176838630	merged_common_peak	296	312	0.206373	8.39321	1.07641
chr1	176850521	176850902	unique_peak2	38	54	-0.533979	5.51437	0.908349
chr1	176860844	176861869	merged_common_peak	160	125	0.539165	7.24686	2.68695
chr1	176890004	176890596	merged_common_peak	73	96	-0.327494	6.43617	0.755068
chr1	176971418	176971824	merged_common_peak	117	171	-0.407085	7.22272	1.51751
chr1	177459782	177460559	merged_common_peak	157	159	0.164415	7.40414	0.558159
chr1	177532177	177532825	merged_common_peak	105	90	0.339754	6.67767	0.964715
chr1	177537811	177538767	merged_common_peak	944	792	0.71756	9.98996	27.7361
chr1	177552835	177553317	merged_common_peak	109	133	-0.159261	6.98646	0.446145
chr1	177553568	177554254	merged_common_peak	264	328	-0.0479973	8.33795	0.334645
chr1	177561599	177562530	unique_peak1	113	104	0.249744	6.83912	0.719792
chr1	177576937	177578000	merged_common_peak	323	391	0.0209315	8.62518	0.314516
chr1	178747984	178748777	merged_common_peak	119	126	0.0573929	7.01738	0.331332
chr1	178792279	178792770	merged_common_peak	99	110	-0.040119	6.77436	0.305014
chr1	178804264	178804707	merged_common_peak	75	75	0.0671706	6.28151	0.33606
chr1	178937477	178937833	merged_common_peak	39	52	-0.440022	5.50791	0.705686
chr1	178976046	178976442	unique_peak2	50	54	-0.104659	5.72903	0.319645
chr1	179388610	179389425	merged_common_peak	227	219	0.291917	7.92732	1.41542
chr1	179405599	179406410	merged_common_peak	369	387	0.248192	8.72401	1.70505
chr1	179641069	179641632	unique_peak1	89	74	0.356863	6.40725	0.920998
chr1	179642828	179643251	merged_common_peak	128	120	0.242954	7.04034	0.73836
chr1	179912887	179913766	merged_common_peak	112	113	0.116999	6.89139	0.411934
chr1	180120444	180120907	merged_common_peak	85	86	0.0699819	6.47793	0.331705
chr1	180148873	180150361	merged_common_peak	245	297	-0.0242864	8.20703	0.306919
chr1	180154883	180155357	merged_common_peak	82	94	-0.113754	6.51298	0.34399
chr1	180165974	180166611	merged_common_peak	152	144	0.254971	7.30739	0.877927
chr1	180178296	180178713	unique_peak2	31	37	-0.31714	5.08936	0.41614
chr1	180241857	180242239	merged_common_peak	51	48	0.093067	5.66124	0.335783
chr1	180248134	180249470	merged_common_peak	493	695	-0.132282	9.3768	0.888996
chr1	180259947	180260658	merged_common_peak	204	264	-0.146747	7.97647	0.570956
chr1	180298788	180300207	merged_common_peak	877	1079	0.154233	10.1539	1.74198
chr1	180336805	180337059	unique_peak2	34	32	0.0298058	5.0593	0.314192
chr1	180356937	180357198	unique_peak2	8	10	-0.558723	3.18007	1.12966
chr1	180778934	180779176	unique_peak2	3	7	-1.39707	2.30146	1.23215
chr1	180866251	180867032	merged_common_peak	89	129	-0.436686	6.80402	1.35582
chr1	180911834	180912147	merged_common_peak	56	36	0.645249	5.53208	1.42955
chr1	181166544	181167009	merged_common_peak	75	103	-0.385342	6.50777	0.930403
chr1	181475725	181476847	merged_common_peak	150	185	-0.125337	7.47649	0.420614
chr1	181486842	181487630	unique_peak2	81	208	-1.27066	7.07203	11.4027
chr1	181498691	181499357	merged_common_peak	98	160	-0.592704	7.03456	2.60079
chr1	181501433	181502310	unique_peak2	66	113	-0.719503	6.47314	2.63395
chr1	181763718	181764164	merged_common_peak	143	206	-0.355629	7.51567	1.44615
chr1	181766481	181766989	merged_common_peak	311	415	-0.125197	8.63784	0.61648
chr1	181889385	181889893	unique_peak1	72	53	0.495758	6.00277	1.19628
chr1	181912986	181913482	merged_common_peak	94	84	0.262818	6.5408	0.679879
chr1	181948242	181948874	merged_common_peak	140	127	0.304165	7.15208	1.03469
chr1	181951488	181952037	merged_common_peak	85	153	-0.753861	6.88986	3.75979
chr1	181971851	181973042	merged_common_peak	305	160	1.21325	7.93754	19.311
chr1	182106850	182107357	merged_common_peak	173	240	-0.272175	7.7768	1.09175
chr1	182124622	182126561	merged_common_peak	419	510	0.0537741	9.02407	0.384553
chr1	182130126	182130387	unique_peak2	16	20	-0.473795	4.15542	0.456667
chr1	182139930	182141431	merged_common_peak	963	1211	0.13742	10.3119	1.57197
chr1	182146341	182147417	merged_common_peak	427	542	-0.00365836	9.08298	0.30103
chr1	182155817	182156659	merged_common_peak	127	140	0.00981133	7.14446	0.30411
chr1	182175721	182176779	merged_common_peak	521	657	0.0369494	9.38042	0.353851
chr1	182186080	182187001	unique_peak2	105	115	-0.0104327	6.85276	0.30103
chr1	182209610	182210532	merged_common_peak	100	98	0.140864	6.69979	0.428021
chr1	182229556	182230249	unique_peak1	78	70	0.227308	6.2634	0.541175
chr1	182464718	182465092	unique_peak2	28	87	-1.68618	5.61634	7.51629
chr1	182645090	182645833	merged_common_peak	425	553	-0.040088	9.0937	0.340006
chr1	182687575	182688693	merged_common_peak	172	143	0.461565	7.40071	2.23578
chr1	182698042	182699038	merged_common_peak	165	207	-0.135051	7.63291	0.478757
chr1	182743816	182744144	merged_common_peak	49	73	-0.564444	5.92723	1.24046
chr1	182780602	182781997	unique_peak1	127	94	0.579507	6.85961	2.43584
chr1	182864011	182864374	unique_peak2	47	72	-0.610145	5.88475	1.3504
chr1	182882388	182883073	merged_common_peak	617	764	0.089752	9.62419	0.64511
chr1	182911067	182911895	merged_common_peak	326	332	0.271013	8.51488	1.75286
chr1	182935147	182936130	merged_common_peak	350	367	0.240177	8.64365	1.55452
chr1	182939422	182940749	merged_common_peak	243	266	0.121122	8.12126	0.526058
chr1	182965389	182966072	merged_common_peak	212	222	0.163467	7.88263	0.661927
chr1	182967621	182968421	merged_common_peak	500	790	-0.294354	9.48036	3.48801
chr1	183074176	183074649	unique_peak2	47	53	-0.175208	5.66728	0.354801
chr1	183186453	183189236	merged_common_peak	376	384	0.289384	8.73341	2.22669
chr1	183397346	183397707	unique_peak2	37	34	0.0765278	5.16755	0.328564
chr1	183405903	183406629	merged_common_peak	130	96	0.586526	6.89318	2.56053
chr1	184120135	184120642	merged_common_peak	107	150	-0.360942	7.05793	1.13271
chr1	184168167	184168894	unique_peak1	87	63	0.549717	6.27486	1.63897
chr1	184186116	184186613	merged_common_peak	280	382	-0.173433	8.49448	0.831867
chr1	184217836	184218284	unique_peak2	41	73	-0.843473	5.78772	2.278
chr1	184360343	184361156	merged_common_peak	105	123	-0.106648	6.90087	0.359434
chr1	184369672	184370313	unique_peak2	61	78	-0.314515	6.14652	0.601242
chr1	184390859	184391781	merged_common_peak	182	188	0.15918	7.64183	0.589087
chr1	184409092	184409609	merged_common_peak	80	90	-0.090728	6.46243	0.332055
chr1	184429429	184430310	merged_common_peak	138	187	-0.273286	7.41795	0.910253
chr1	184430888	184431442	merged_common_peak	81	97	-0.178007	6.52571	0.419103
chr1	184492876	184494220	unique_peak1	214	83	1.58701	7.18582	19.6925
chr1	184504820	184505224	merged_common_peak	95	87	0.229535	6.5742	0.593954
chr1	184688415	184689179	unique_peak1	83	25	1.77483	5.58785	8.57551
chr1	184732632	184733372	unique_peak1	90	60	0.672628	6.26705	2.21243
chr1	184753861	184754322	unique_peak1	46	27	0.738631	5.17667	1.48952
chr1	184833209	184833509	merged_common_peak	37	45	-0.317751	5.36469	0.470781
chr1	184844111	184844806	unique_peak2	63	101	-0.63235	6.35625	1.90575
chr1	184887091	184888282	merged_common_peak	180	169	0.294444	7.55661	1.17868
chr1	185857374	185858779	merged_common_peak	311	441	-0.212659	8.68157	1.25289
chr1	185883734	185884911	merged_common_peak	294	379	-0.0842774	8.52772	0.430982
chr1	185903851	185904348	merged_common_peak	128	94	0.591961	6.86584	2.51685
chr1	185923951	185924848	merged_common_peak	526	764	-0.165167	9.49673	1.31132
chr1	186301939	186302284	unique_peak2	31	65	-1.11361	5.48759	2.97345
chr1	186429174	186429994	merged_common_peak	116	124	0.0397756	6.98567	0.314818
chr1	186432162	186432656	merged_common_peak	130	163	-0.171114	7.272	0.504225
chr1	186499236	186500269	merged_common_peak	341	435	-0.0460157	8.74518	0.343853
chr1	186511415	186511695	unique_peak2	12	18	-0.758725	3.86856	0.671583
chr1	186553172	186553743	merged_common_peak	113	101	0.291564	6.81821	0.855512
chr1	186634657	186636019	merged_common_peak	458	532	0.135067	9.12553	0.847311
chr1	186647860	186649049	merged_common_peak	217	234	0.124983	7.93901	0.51559
chr1	186666310	186666769	merged_common_peak	129	115	0.316194	7.01608	1.00761
chr1	186669445	186670819	unique_peak1	214	242	0.0545111	7.95207	0.34499
chr1	186674902	186676737	merged_common_peak	686	751	0.283871	9.69652	3.85323
chr1	186691250	186692297	merged_common_peak	449	447	0.354012	8.98436	3.68951
chr1	186735722	186736207	unique_peak2	39	55	-0.519456	5.54763	0.895299
chr1	187017375	187017796	merged_common_peak	33	43	-0.431622	5.24362	0.58758
chr1	187040660	187040971	unique_peak1	24	18	0.287795	4.39182	0.433767
chr1	187132908	187133157	unique_peak2	19	13	0.371256	3.99298	0.476916
chr1	187142875	187143973	merged_common_peak	107	89	0.385609	6.68466	1.18617
chr1	187186482	187187312	merged_common_peak	108	99	0.248356	6.76803	0.700026
chr1	187280122	187280806	merged_common_peak	97	76	0.455179	6.49438	1.37975
chr1	187435065	187435441	unique_peak1	43	16	1.35297	4.76395	3.08659
chr1	187858321	187858732	merged_common_peak	83	113	-0.357622	6.65408	0.921687
chr1	188006414	188006914	unique_peak1	62	37	0.766945	5.6314	1.9917
chr1	188141113	188141611	unique_peak1	51	22	1.18421	5.11567	3.01958
chr1	188197807	188198337	merged_common_peak	322	292	0.435937	8.41273	3.72791
chr1	188232740	188233234	merged_common_peak	59	66	-0.129299	6.00144	0.343787
chr1	188478900	188479314	unique_peak1	44	6	2.66904	4.14187	7.63095
chr1	188576230	188576593	unique_peak1	41	23	0.781018	4.97547	1.41531
chr1	188609121	188609607	unique_peak1	55	15	1.82638	4.91319	5.97349
chr1	188754306	188755140	merged_common_peak	85	80	0.173075	6.42639	0.45479
chr1	188776223	188776702	merged_common_peak	78	142	-0.782816	6.76846	3.70014
chr1	188837999	188838454	merged_common_peak	73	99	-0.371437	6.45814	0.89975
chr1	188979552	188979991	merged_common_peak	210	321	-0.381648	8.14009	2.40048
chr1	188999287	188999725	unique_peak1	52	37	0.490333	5.49309	0.921989
chr1	189033443	189033778	unique_peak2	25	53	-1.1564	5.17669	2.73224
chr1	189132658	189133048	merged_common_peak	76	159	-0.98591	6.82897	5.90696
chr1	189308587	189309235	merged_common_peak	171	135	0.53475	7.35484	2.83005
chr1	189329159	189329773	merged_common_peak	189	148	0.562328	7.50033	3.37979
chr1	189417325	189417600	unique_peak2	9	14	-0.837567	3.48811	0.660903
chr1	189455329	189455783	merged_common_peak	103	204	-0.862416	7.24827	6.05417
chr1	189555038	189555345	merged_common_peak	45	75	-0.736359	5.87975	1.82508
chr1	189566840	189567430	merged_common_peak	133	155	-0.0627276	7.25404	0.326746
chr1	189580069	189581368	merged_common_peak	181	267	-0.353436	7.88937	1.78363
chr1	189586424	189587446	unique_peak2	131	193	-0.401304	7.39926	1.65661
chr1	189589142	189589506	merged_common_peak	74	81	-0.063651	6.32573	0.313322
chr1	189623140	189623534	unique_peak2	21	59	-1.57575	5.11902	4.67073
chr1	189643273	189643655	unique_peak2	37	58	-0.676832	5.54423	1.31742
chr1	189656387	189656708	unique_peak2	15	46	-1.73309	4.68804	4.20641
chr1	189712817	189713474	merged_common_peak	266	578	-0.85144	8.7517	16.4794
chr1	189720764	189721379	merged_common_peak	156	224	-0.337599	7.64498	1.44653
chr1	189842379	189842766	unique_peak2	27	52	-1.01083	5.2225	2.21947
chr1	189915572	189916000	merged_common_peak	48	63	-0.387322	5.80634	0.682034
chr1	189941910	189942690	merged_common_peak	116	148	-0.213609	7.11236	0.616012
chr1	189949792	189950197	merged_common_peak	65	47	0.504359	5.83714	1.13843
chr1	189964127	189964452	unique_peak2	15	24	-0.822356	4.23268	0.879255
chr1	190118334	190118564	unique_peak2	3	6	-1.20443	2.20514	1.08602
chr1	190476847	190477370	merged_common_peak	107	92	0.338304	6.70831	1.00183
chr1	190540726	190541078	unique_peak2	25	40	-0.759063	4.97802	1.1789
chr1	190638822	190639296	merged_common_peak	90	146	-0.596307	6.90152	2.46137
chr1	190689750	190690176	merged_common_peak	89	44	1.09383	6.03877	4.59726
chr1	190729927	190730605	merged_common_peak	134	78	0.930793	6.76918	5.44347
chr1	190817075	190817485	merged_common_peak	74	88	-0.181832	6.38482	0.431921
chr1	191684616	191685187	merged_common_peak	92	99	-0.00569883	6.64101	0.302121
chr1	191691465	191691779	unique_peak2	24	30	-0.418474	4.74496	0.502377
chr1	191809419	191810144	unique_peak2	82	75	0.208174	6.35201	0.52641
chr1	191865895	191867008	merged_common_peak	390	455	0.103562	8.88467	0.582582
chr1	191872363	191873036	merged_common_peak	332	479	-0.227401	8.79319	1.46512
chr1	191882078	191884141	merged_common_peak	262	300	0.0682027	8.26772	0.391283
chr1	191929788	191931406	merged_common_peak	858	939	0.319519	10.0363	5.94239
chr1	191931529	191932052	unique_peak2	152	162	0.0861516	7.3918	0.379476
chr1	191946115	191946644	merged_common_peak	449	534	0.0979722	9.11238	0.599449
chr1	191953274	191954174	merged_common_peak	289	447	-0.349134	8.63279	2.7596
chr1	191956773	191957626	merged_common_peak	228	237	0.185463	7.98755	0.795538
chr1	191971536	191972244	merged_common_peak	399	413	0.279385	8.83318	2.18381
chr1	191997488	191998941	unique_peak2	235	311	-0.156935	8.20693	0.654286
chr1	192025445	192026155	merged_common_peak	229	273	-0.010778	8.09264	0.301428
chr1	192028058	192029013	merged_common_peak	314	329	0.224236	8.47844	1.25575
chr1	192620515	192621024	merged_common_peak	59	74	-0.292028	6.0828	0.573288
chr1	192646388	192646963	merged_common_peak	119	139	-0.0832054	7.08768	0.340297
chr1	192656931	192657408	unique_peak2	65	67	0.00185829	6.08839	0.302639
chr1	192704314	192705247	merged_common_peak	161	192	-0.066103	7.55941	0.337994
chr1	193078133	193078835	merged_common_peak	122	123	0.131398	7.0199	0.44278
chr1	193087327	193087764	unique_peak2	49	80	-0.694841	5.99243	1.81799
chr1	193101410	193102455	merged_common_peak	150	231	-0.444159	7.6359	2.25292
chr1	193112625	193113074	merged_common_peak	92	84	0.228766	6.52377	0.60353
chr1	193172554	193172826	unique_peak2	15	20	-0.570817	4.10691	0.532159
chr1	193214865	193215621	merged_common_peak	182	209	0.00717648	7.71783	0.303098
chr1	193237475	193238464	merged_common_peak	119	142	-0.113794	7.10297	0.380298
chr1	193243920	193245221	merged_common_peak	229	280	-0.0471722	8.11084	0.326207
chr1	193268009	193270217	merged_common_peak	1049	1224	0.258786	10.388	5.03494
chr1	193282512	193283098	merged_common_peak	109	87	0.447396	6.68313	1.4483
chr1	193296377	193296831	unique_peak1	70	45	0.682626	5.86487	1.85122
chr1	193303626	193304542	merged_common_peak	374	542	-0.215222	8.9772	1.47941
chr1	193317640	193318621	merged_common_peak	144	158	0.0360506	7.33091	0.317942
chr1	193318783	193319558	merged_common_peak	150	168	0.0129426	7.40735	0.306795
chr1	193411389	193411847	merged_common_peak	136	106	0.516641	6.99979	2.16337
chr1	193452097	193453357	merged_common_peak	255	426	-0.479442	8.49837	4.59212
chr1	193456322	193457028	merged_common_peak	145	214	-0.38826	7.55406	1.74141
chr1	193463593	193464806	unique_peak2	178	184	0.154672	7.60872	0.570658
chr1	193465046	193466032	merged_common_peak	319	296	0.401442	8.41504	3.21931
chr1	193486864	193487230	unique_peak2	55	57	-0.0316045	5.84218	0.30103
chr1	193487545	193487933	unique_peak2	48	68	-0.495847	5.8606	0.974008
chr1	193511405	193511793	unique_peak2	50	69	-0.452582	5.90299	0.889546
chr1	193516826	193517846	merged_common_peak	97	112	-0.0982138	6.77107	0.336894
chr1	193525912	193526394	unique_peak1	62	53	0.259985	5.88488	0.566482
chr1	193562688	193563050	unique_peak2	22	41	-0.990036	4.8973	1.72735
chr1	193581992	193583053	merged_common_peak	86	113	-0.301463	6.68216	0.72334
chr1	193588795	193589181	merged_common_peak	57	96	-0.717377	6.24122	2.23757
chr1	193617620	193618595	merged_common_peak	543	723	-0.034887	9.4824	0.339905
chr1	193662774	193663575	merged_common_peak	140	155	0.018763	7.29478	0.307274
chr1	193701483	193701906	merged_common_peak	69	81	-0.174065	6.27052	0.391314
chr1	193707508	193708302	merged_common_peak	147	125	0.404427	7.17949	1.6174
chr1	193732370	193732676	unique_peak2	38	39	-0.0745471	5.28465	0.30385
chr1	193770511	193771209	merged_common_peak	124	86	0.668464	6.77718	2.94637
chr1	193780691	193781670	unique_peak1	135	121	0.315647	7.08856	1.06707
chr1	193819711	193820219	merged_common_peak	98	78	0.434432	6.521	1.29225
chr1	193899368	193899955	merged_common_peak	324	572	-0.521818	8.90148	7.03
chr1	193931330	193931653	merged_common_peak	48	40	0.255126	5.48511	0.498997
chr1	193940034	193940514	merged_common_peak	64	60	0.13415	5.99781	0.384854
chr1	193949665	193949959	unique_peak2	27	35	-0.452836	4.94351	0.590428
chr1	194240145	194240764	unique_peak2	74	86	-0.149043	6.36842	0.385804
chr1	194273965	194274422	merged_common_peak	66	152	-1.144	6.68539	7.23878
chr1	194277936	194278225	unique_peak2	66	67	0.0259244	6.10043	0.307417
chr1	194436093	194436687	merged_common_peak	134	109	0.453214	7.00797	1.78077
chr1	194644473	194645005	merged_common_peak	101	97	0.171278	6.70035	0.478431
chr1	194955895	194956649	merged_common_peak	88	95	-0.0171621	6.57638	0.30103
chr1	194981865	194983165	merged_common_peak	158	167	0.104122	7.44438	0.423364
chr1	195034331	195034775	unique_peak2	79	93	-0.157403	6.47589	0.400445
chr1	195068375	195068973	merged_common_peak	250	276	0.113342	8.17041	0.51824
chr1	195097526	195098107	unique_peak2	116	143	-0.164365	7.08774	0.48141
chr1	195115945	195116647	merged_common_peak	656	1061	-0.285565	9.90979	4.36506
chr1	195136676	195137202	merged_common_peak	83	129	-0.5471	6.74882	1.90384
chr1	195137747	195138270	unique_peak1	92	87	0.178726	6.54879	0.497434
chr1	195153583	195154490	merged_common_peak	192	266	-0.254128	7.93363	1.08372
chr1	195212422	195212843	unique_peak2	36	53	-0.591756	5.45901	1.0105
chr1	195225198	195225562	merged_common_peak	56	64	-0.167666	5.93854	0.365132
chr1	196134751	196135220	merged_common_peak	90	89	0.111512	6.54761	0.37577
chr1	196144498	196145216	merged_common_peak	813	1097	0.00926078	10.1053	0.307341
chr1	196189370	196190574	merged_common_peak	835	1095	0.0545699	10.1253	0.480846
chr1	196287250	196287609	unique_peak1	42	23	0.818676	4.9943	1.52482
chr1	196308315	196309410	merged_common_peak	1071	1420	0.0778459	10.5116	0.777029
chr1	196486569	196487103	merged_common_peak	92	145	-0.551667	6.91399	2.10605
chr1	196807650	196808465	merged_common_peak	149	175	-0.0562433	7.43131	0.323756
chr1	196821363	196821830	merged_common_peak	74	114	-0.551589	6.5697	1.77549
chr1	196843986	196844683	merged_common_peak	195	216	0.0697013	7.7964	0.371465
chr1	196866370	196866848	merged_common_peak	80	88	-0.0586668	6.4464	0.312327
chr1	196957052	196957931	merged_common_peak	119	135	-0.0413853	7.06677	0.30835
chr1	197047853	197048541	merged_common_peak	356	258	0.774056	8.40384	11.0295
chr1	197056456	197057094	merged_common_peak	100	58	0.887578	6.32643	3.7377
chr1	197067577	197068233	merged_common_peak	245	405	-0.470454	8.43011	4.22038
chr1	197111234	197111677	merged_common_peak	81	76	0.169917	6.35174	0.462348
chr10	3077574	3078275	merged_common_peak	82	94	-0.113754	6.51298	0.34399
chr10	3133211	3134546	merged_common_peak	160	171	0.0901798	7.47135	0.389378
chr10	3147880	3148376	merged_common_peak	76	79	0.0140901	6.32897	0.306459
chr10	3186225	3186458	unique_peak2	10	9	-0.100073	3.27189	1.03275
chr10	3186822	3187508	merged_common_peak	91	112	-0.199323	6.72052	0.503851
chr10	3196547	3196968	unique_peak2	52	51	0.0378212	5.71935	0.309382
chr10	3205757	3206252	merged_common_peak	62	70	-0.134875	6.08231	0.341252
chr10	3227723	3228262	merged_common_peak	345	566	-0.406427	8.94399	4.47481
chr10	4504834	4505201	merged_common_peak	48	60	-0.31806	5.77171	0.542494
chr10	4823546	4823876	unique_peak2	13	37	-1.64013	4.42786	3.20553
chr10	4866006	4866455	merged_common_peak	66	48	0.498677	5.86405	1.12396
chr10	5133512	5133873	merged_common_peak	70	64	0.18382	6.11428	0.458521
chr10	5371940	5372304	merged_common_peak	48	69	-0.516605	5.87098	1.04069
chr10	5521842	5522138	unique_peak2	11	28	-1.49688	4.10954	2.22882
chr10	5539489	5539663	unique_peak2	4	1	0.960037	1.48002	1.10721
chr10	5607808	5608567	merged_common_peak	108	136	-0.20582	6.99512	0.547313
chr10	5679003	5679601	merged_common_peak	367	698	-0.609718	9.14429	11.1999
chr10	5701049	5701471	unique_peak2	26	58	-1.22376	5.27077	3.23036
chr10	5720711	5721345	merged_common_peak	718	1491	-0.631712	10.2272	25.1638
chr10	5725177	5726020	merged_common_peak	334	481	-0.223817	8.80098	1.42526
chr10	5741068	5741975	merged_common_peak	135	176	-0.221221	7.35699	0.682703
chr10	5759377	5759822	merged_common_peak	112	136	-0.148143	7.02396	0.421339
chr10	5957698	5958323	merged_common_peak	102	149	-0.427217	7.01521	1.44386
chr10	5999197	5999713	unique_peak1	52	40	0.380709	5.54791	0.696926
chr10	6240019	6240508	merged_common_peak	111	81	0.578112	6.64661	2.11161
chr10	6402283	6402713	merged_common_peak	60	73	-0.24621	6.08635	0.495874
chr10	6429095	6429503	merged_common_peak	48	53	-0.14221	5.68378	0.335101
chr10	6627944	6628564	merged_common_peak	86	104	-0.182819	6.62284	0.434474
chr10	6639867	6640361	merged_common_peak	146	160	0.0399398	7.35089	0.325011
chr10	6750954	6751357	merged_common_peak	68	108	-0.607724	6.46432	1.87508
chr10	6781057	6781366	unique_peak2	17	47	-1.57497	4.79748	3.76198
chr10	6806139	6806646	unique_peak1	65	44	0.597468	5.79059	1.42649
chr10	7075063	7075493	merged_common_peak	66	91	-0.410175	6.31847	0.959986
chr10	7230723	7235357	unique_peak1	1866	1061	1.38586	10.7455	172.633
chr10	7236023	7237299	unique_peak1	445	241	1.22821	8.53297	29.6926
chr10	7456645	7457433	merged_common_peak	356	450	-0.0261194	8.80392	0.312945
chr10	7458135	7458572	merged_common_peak	129	206	-0.519312	7.43383	2.69856
chr10	7493993	7494587	unique_peak2	62	64	-0.00749561	6.01862	0.302713
chr10	7512391	7513135	merged_common_peak	101	74	0.55717	6.5074	1.84041
chr10	7561287	7561929	merged_common_peak	102	77	0.516199	6.5435	1.71662
chr10	7571527	7571982	merged_common_peak	117	133	-0.0469091	7.04263	0.308461
chr10	7584357	7585053	unique_peak2	69	77	-0.101915	6.23444	0.324195
chr10	7806569	7807593	merged_common_peak	630	694	0.261514	9.57163	3.05238
chr10	7808461	7808931	merged_common_peak	143	227	-0.495032	7.58537	2.67061
chr10	7815687	7816159	unique_peak2	28	75	-1.47468	5.51059	5.40529
chr10	7853253	7853526	unique_peak1	25	27	-0.208865	4.70292	0.339372
chr10	7947759	7948220	merged_common_peak	199	256	-0.14204	7.9346	0.536026
chr10	8593150	8594301	merged_common_peak	181	181	0.204858	7.61022	0.76852
chr10	8604887	8606607	merged_common_peak	265	276	0.206232	8.21686	1.00704
chr10	8671705	8672108	merged_common_peak	58	57	0.0519117	5.88394	0.317735
chr10	8702614	8702992	unique_peak1	48	13	1.80532	4.71002	5.13748
chr10	9295441	9295776	merged_common_peak	41	45	-0.157581	5.44477	0.341444
chr10	9621721	9622199	merged_common_peak	82	85	0.0298371	6.44118	0.312327
chr10	10162867	10163281	merged_common_peak	101	130	-0.247435	6.90971	0.663362
chr10	10168749	10169327	merged_common_peak	421	587	-0.141116	9.12911	0.866608
chr10	10277582	10278338	merged_common_peak	74	90	-0.213894	6.40085	0.487315
chr10	10299534	10300144	merged_common_peak	942	1221	0.0903175	10.3002	0.85217
chr10	10300562	10301055	merged_common_peak	220	298	-0.200629	8.12369	0.863402
chr10	10566535	10566945	unique_peak1	83	22	1.95171	5.49942	9.71352
chr10	10918164	10918417	unique_peak2	13	10	0.14837	3.53362	0.340566
chr10	10931836	10932185	unique_peak1	42	31	0.403638	5.20182	0.662334
chr10	10994256	10994687	merged_common_peak	56	46	0.300113	5.70465	0.602366
chr10	11025826	11026281	merged_common_peak	48	61	-0.341519	5.78344	0.585862
chr10	11062760	11063731	merged_common_peak	138	172	-0.153326	7.35797	0.470578
chr10	11211880	11212019	unique_peak2	1	1	-0.506362	0.746819	0.60206
chr10	12187395	12187726	unique_peak2	30	39	-0.44195	5.10095	0.621525
chr10	12189424	12189798	unique_peak2	30	61	-1.07422	5.41709	2.82657
chr10	12192208	12192637	merged_common_peak	103	157	-0.486717	7.06042	1.86502
chr10	12307465	12308419	merged_common_peak	124	112	0.291229	6.96579	0.889259
chr10	12362858	12363645	merged_common_peak	122	154	-0.19053	7.18086	0.543792
chr10	12376057	12376461	merged_common_peak	46	83	-0.846331	5.96915	2.49437
chr10	12398401	12398779	merged_common_peak	60	103	-0.737197	6.33184	2.53665
chr10	12446128	12446547	merged_common_peak	71	75	-0.0193566	6.23825	0.30103
chr10	12536937	12537668	merged_common_peak	119	92	0.506919	6.79262	1.86043
chr10	12572687	12573324	merged_common_peak	124	159	-0.21052	7.21667	0.62373
chr10	13272650	13273185	merged_common_peak	59	60	0.00605287	5.93376	0.302825
chr10	13435887	13436272	unique_peak2	36	71	-1.00679	5.66653	2.83341
chr10	13555617	13555936	unique_peak2	23	48	-1.14432	5.04255	2.44915
chr10	13558290	13558961	merged_common_peak	116	175	-0.453872	7.2325	1.89054
chr10	13683809	13685804	merged_common_peak	366	516	-0.178944	8.92455	1.07837
chr10	13702622	13704734	merged_common_peak	302	324	0.184104	8.43635	0.935998
chr10	13732761	13732999	unique_peak2	17	14	0.103106	3.95844	0.330004
chr10	13747587	13748040	unique_peak2	34	59	-0.832691	5.49055	1.77846
chr10	13750287	13750821	merged_common_peak	114	106	0.2365	6.85972	0.675887
chr10	14696993	14697529	merged_common_peak	114	134	-0.0988489	7.02739	0.35449
chr10	15466534	15467345	merged_common_peak	403	373	0.441901	8.76785	4.81084
chr10	15479484	15480222	merged_common_peak	111	91	0.412102	6.72961	1.28423
chr10	15872276	15872666	unique_peak1	40	14	1.42053	4.61715	3.13558
chr10	16356767	16357215	merged_common_peak	234	256	0.116047	8.06365	0.515808
chr10	16680804	16681190	merged_common_peak	41	51	-0.334459	5.53321	0.537527
chr10	16729849	16730333	merged_common_peak	81	109	-0.344656	6.60903	0.838382
chr10	16931784	16932233	unique_peak1	52	23	1.1533	5.16161	2.94384
chr10	17053550	17054080	unique_peak2	49	59	-0.261881	5.77595	0.46258
chr10	17127614	17128385	merged_common_peak	98	94	0.168357	6.65403	0.483734
chr10	17196467	17196914	unique_peak2	35	59	-0.787607	5.51309	1.64648
chr10	17271531	17272506	unique_peak1	174	46	2.0953	6.60224	23.0886
chr10	17282289	17282582	unique_peak2	25	30	-0.355707	4.77634	0.446094
chr10	17289429	17290233	merged_common_peak	131	92	0.65945	6.86888	3.07423
chr10	17295761	17296358	unique_peak2	57	55	0.0751805	5.84495	0.331513
chr10	17366152	17366583	unique_peak2	44	48	-0.138315	5.54555	0.322048
chr10	17371160	17371693	merged_common_peak	95	76	0.42218	6.47788	1.18877
chr10	17381801	17382255	merged_common_peak	78	116	-0.493309	6.62371	1.49485
chr10	17403205	17404582	merged_common_peak	384	395	0.282347	8.77053	2.17822
chr10	17441458	17442461	merged_common_peak	519	606	0.147197	9.31915	1.0415
chr10	17638712	17639134	unique_peak2	44	57	-0.381587	5.66719	0.608302
chr10	17650285	17651004	merged_common_peak	115	151	-0.256105	7.11988	0.751507
chr10	17667661	17668495	merged_common_peak	107	141	-0.272285	7.0136	0.745132
chr10	17703007	17703471	merged_common_peak	64	92	-0.474271	6.30202	1.15815
chr10	17767610	17768115	merged_common_peak	156	182	-0.0395181	7.49594	0.310681
chr10	17785588	17786632	merged_common_peak	291	361	-0.0306258	8.48453	0.315912
chr10	17788667	17789250	merged_common_peak	155	123	0.511759	7.21008	2.42325
chr10	17877683	17878077	unique_peak2	42	78	-0.900143	5.85371	2.68273
chr10	17954375	17955427	merged_common_peak	325	415	-0.0549499	8.67296	0.360982
chr10	17995948	17996570	merged_common_peak	216	116	1.12378	7.43225	11.8903
chr10	18086688	18087160	unique_peak1	104	20	2.44006	5.61235	16.1148
chr10	18120705	18121194	merged_common_peak	98	85	0.311948	6.58224	0.849626
chr10	18128972	18129655	merged_common_peak	141	94	0.74562	6.94267	3.96829
chr10	18155299	18155722	merged_common_peak	57	80	-0.457315	6.11119	0.99261
chr10	18230409	18230846	merged_common_peak	92	119	-0.268733	6.77252	0.659426
chr10	18247532	18247977	merged_common_peak	103	101	0.144639	6.74474	0.447224
chr10	18728929	18729526	merged_common_peak	81	79	0.114775	6.37932	0.384782
chr10	19163102	19163811	merged_common_peak	102	78	0.497821	6.55269	1.62934
chr10	19172103	19172471	unique_peak1	49	30	0.690813	5.2996	1.39837
chr10	19183552	19184059	merged_common_peak	221	262	-0.00832082	8.03476	0.301445
chr10	19184156	19184612	unique_peak1	87	37	1.30179	5.89882	5.8709
chr10	19252543	19252953	unique_peak2	52	90	-0.769534	6.12303	2.40371
chr10	19269138	19269652	merged_common_peak	127	216	-0.612189	7.45546	3.6466
chr10	19272628	19273247	unique_peak1	91	81	0.263304	6.4892	0.652149
chr10	19351352	19351902	merged_common_peak	161	181	0.0185594	7.51707	0.306384
chr10	19596947	19597538	merged_common_peak	695	945	-0.0264073	9.87249	0.330694
chr10	19598792	19599270	merged_common_peak	93	141	-0.494473	6.90251	1.74332
chr10	19627764	19628278	unique_peak2	64	92	-0.474271	6.30202	1.15815
chr10	19656257	19657480	merged_common_peak	212	208	0.257008	7.83586	1.13855
chr10	19665378	19665974	merged_common_peak	160	177	0.0407112	7.49609	0.322746
chr10	19666400	19667004	unique_peak2	76	104	-0.378227	6.52513	0.923563
chr10	19675137	19675995	merged_common_peak	139	149	0.063956	7.2608	0.346452
chr10	19676551	19676931	merged_common_peak	103	88	0.341331	6.6464	0.977991
chr10	19765413	19766365	merged_common_peak	116	122	0.0630454	6.97404	0.332302
chr10	19783863	19785030	merged_common_peak	113	119	0.0570991	6.93544	0.333071
chr10	19790358	19791111	merged_common_peak	226	219	0.284883	7.9238	1.37342
chr10	19791350	19791862	merged_common_peak	179	195	0.0802593	7.65484	0.378826
chr10	19796434	19797827	unique_peak2	138	226	-0.545246	7.55393	3.10223
chr10	19797975	19798498	unique_peak1	74	72	0.104076	6.24186	0.353159
chr10	19824217	19824763	unique_peak2	58	69	-0.21939	6.01959	0.437489
chr10	19839117	19839475	unique_peak2	31	46	-0.623801	5.24269	0.939627
chr10	19869151	19869661	merged_common_peak	110	132	-0.133972	6.9883	0.404916
chr10	19884563	19885316	merged_common_peak	232	168	0.707114	7.75444	6.06318
chr10	19888489	19889500	merged_common_peak	231	220	0.313208	7.94451	1.63078
chr10	19906515	19907311	merged_common_peak	127	165	-0.225677	7.2622	0.675553
chr10	19940218	19940959	merged_common_peak	268	217	0.569738	8.05305	4.92688
chr10	20067061	20067869	merged_common_peak	151	177	-0.0513479	7.45006	0.316585
chr10	20193853	20194266	unique_peak2	66	81	-0.244165	6.23547	0.509714
chr10	20196459	20196923	unique_peak1	107	36	1.66801	6.04346	10.2904
chr10	20237675	20238733	merged_common_peak	131	113	0.365718	7.01575	1.26927
chr10	20309956	20310521	merged_common_peak	172	191	0.0465278	7.60823	0.328384
chr10	20341432	20342067	merged_common_peak	74	92	-0.245258	6.41653	0.551672
chr10	20349904	20350738	merged_common_peak	121	188	-0.489712	7.31739	2.19804
chr10	20468646	20469111	merged_common_peak	67	53	0.382209	5.94599	0.812875
chr10	20495493	20496238	merged_common_peak	95	97	0.074257	6.65184	0.340122
chr10	20550190	20550663	merged_common_peak	138	113	0.448412	7.0571	1.80004
chr10	20561978	20562268	unique_peak1	27	7	1.71709	3.85854	2.82905
chr10	20671836	20672631	merged_common_peak	102	110	0.0071858	6.79801	0.304943
chr10	20685873	20686302	merged_common_peak	94	52	0.944288	6.20006	3.89085
chr10	20765856	20766999	merged_common_peak	111	105	0.207743	6.83179	0.577745
chr10	20979094	20979889	unique_peak1	92	74	0.409339	6.43349	1.14783
chr10	21015072	21015867	merged_common_peak	276	340	-0.0288051	8.39923	0.312629
chr10	21069697	21070296	merged_common_peak	109	101	0.234402	6.78963	0.656175
chr10	21096526	21097544	merged_common_peak	237	199	0.498117	7.89291	3.42669
chr10	21097949	21098859	merged_common_peak	430	497	0.132326	9.02617	0.80109
chr10	21146006	21146630	merged_common_peak	91	161	-0.718994	6.98035	3.66228
chr10	21160699	21162102	merged_common_peak	534	694	-0.00260836	9.43956	0.30103
chr10	21163888	21164772	merged_common_peak	211	281	-0.182716	8.04819	0.74834
chr10	21179674	21180224	merged_common_peak	121	101	0.400105	6.87248	1.36839
chr10	21184181	21185467	merged_common_peak	172	154	0.355366	7.45381	1.49847
chr10	21329327	21329970	merged_common_peak	85	90	0.00513077	6.51036	0.30223
chr10	21348127	21348680	unique_peak2	54	61	-0.156656	5.87587	0.347443
chr10	21405684	21406385	merged_common_peak	143	246	-0.610509	7.64311	4.08339
chr10	21632459	21632942	unique_peak1	63	28	1.18209	5.44903	3.73416
chr10	21656251	21656795	merged_common_peak	112	100	0.291678	6.80405	0.860482
chr10	21714053	21714786	merged_common_peak	124	152	-0.14598	7.1844	0.447849
chr10	21721203	21721873	merged_common_peak	266	376	-0.232441	8.4422	1.24444
chr10	21861974	21862897	merged_common_peak	121	115	0.214549	6.96526	0.648837
chr10	21896332	21896693	unique_peak1	72	32	1.20625	5.64752	4.30914
chr10	21919788	21919997	unique_peak1	5	2	0.666855	1.91839	1.08602
chr10	21977717	21978125	merged_common_peak	75	45	0.791536	5.91933	2.45779
chr10	22084507	22085100	merged_common_peak	110	66	0.855222	6.4937	3.86619
chr10	22167949	22168442	merged_common_peak	90	52	0.875445	6.16564	3.29878
chr10	22494508	22495089	merged_common_peak	75	49	0.671242	5.97948	1.93463
chr10	23330955	23331346	merged_common_peak	85	91	-0.0106365	6.51824	0.30103
chr10	23410981	23411496	merged_common_peak	80	81	0.0595146	6.38731	0.321962
chr10	23431192	23431918	unique_peak1	91	62	0.643576	6.29907	2.07507
chr10	23531438	23532322	merged_common_peak	217	269	-0.0753157	8.03916	0.370938
chr10	23559168	23559515	unique_peak2	37	55	-0.601544	5.50658	1.07072
chr10	23570939	23572158	merged_common_peak	303	393	-0.0883789	8.57786	0.438613
chr10	23642258	23642829	merged_common_peak	132	176	-0.256919	7.33915	0.827129
chr10	23643674	23644445	merged_common_peak	161	177	0.0506206	7.50104	0.330506
chr10	23794279	23794980	merged_common_peak	74	54	0.512541	6.03763	1.25387
chr10	23806386	23806858	unique_peak1	55	40	0.468825	5.59196	0.951348
chr10	23823032	23823488	unique_peak1	61	47	0.404303	5.78711	0.868627
chr10	24031941	24032534	unique_peak2	82	103	-0.244338	6.57827	0.557095
chr10	24036854	24037393	merged_common_peak	226	267	0.000153295	8.06617	0.301436
chr10	24059290	24059727	unique_peak1	57	15	1.88254	4.94127	6.37574
chr10	24098884	24099515	merged_common_peak	87	69	0.420434	6.3395	1.13695
chr10	24110938	24111353	unique_peak2	30	29	-0.0269121	4.89343	0.30103
chr10	24191361	24192036	unique_peak1	117	39	1.69725	6.17055	11.5264
chr10	24254609	24255285	merged_common_peak	162	237	-0.358615	7.71551	1.63951
chr10	24358001	24358570	merged_common_peak	227	289	-0.106632	8.12659	0.456724
chr10	24417965	24418593	merged_common_peak	215	277	-0.132191	8.05285	0.517427
chr10	24552667	24553369	merged_common_peak	100	102	0.0837205	6.72836	0.351467
chr10	24589381	24590299	merged_common_peak	214	291	-0.210501	8.08457	0.909806
chr10	24638338	24639616	merged_common_peak	232	252	0.125	8.04549	0.538
chr10	24646756	24647616	merged_common_peak	221	245	0.0880837	7.98656	0.410909
chr10	24662419	24663040	merged_common_peak	73	88	-0.203314	6.37408	0.460389
chr10	24668061	24669500	merged_common_peak	527	712	-0.060575	9.44747	0.422989
chr10	24671290	24671923	unique_peak2	154	166	0.0719597	7.41968	0.364532
chr10	25016055	25017312	merged_common_peak	116	157	-0.298221	7.15467	0.942915
chr10	25115122	25115730	merged_common_peak	262	420	-0.415854	8.50975	3.50286
chr10	25233618	25234072	unique_peak2	33	60	-0.902928	5.47927	2.02794
chr10	25239603	25240492	merged_common_peak	108	98	0.262856	6.76078	0.743021
chr10	25259079	25260215	merged_common_peak	470	561	0.0999343	9.18439	0.61496
chr10	25291263	25292084	unique_peak1	79	64	0.374818	6.20978	0.889714
chr10	25315578	25316260	unique_peak1	102	72	0.611777	6.49571	2.20443
chr10	25316536	25317002	merged_common_peak	71	106	-0.512896	6.48502	1.45965
chr10	25339139	25339989	merged_common_peak	454	534	0.115656	9.12122	0.71361
chr10	25401093	25401467	unique_peak2	25	47	-0.986473	5.09173	1.94849
chr10	25648161	25648755	merged_common_peak	80	98	-0.21229	6.52321	0.501734
chr10	25859350	25859590	unique_peak2	16	9	0.596594	3.62023	0.630232
chr10	26067962	26068316	merged_common_peak	35	45	-0.404278	5.32142	0.573175
chr10	26440027	26440433	merged_common_peak	48	44	0.120825	5.55227	0.359431
chr10	26548521	26549033	merged_common_peak	59	62	-0.0404897	5.95704	0.302795
chr10	26569670	26570238	merged_common_peak	86	87	0.0719953	6.49543	0.344467
chr10	26575488	26576502	merged_common_peak	719	926	0.0571183	9.88498	0.466946
chr10	26640045	26640618	merged_common_peak	240	266	0.101323	8.11136	0.458418
chr10	26732738	26733361	unique_peak1	64	13	2.25753	4.93612	8.96451
chr10	26833894	26834241	unique_peak1	27	4	2.39516	3.51951	4.21584
chr10	27807151	27807560	merged_common_peak	78	74	0.148237	6.30294	0.413123
chr10	27815671	27816368	merged_common_peak	278	403	-0.261875	8.52727	1.58096
chr10	27837337	27837798	merged_common_peak	82	91	-0.0674602	6.48983	0.311949
chr10	27886844	27887290	merged_common_peak	80	127	-0.582933	6.70853	2.11987
chr10	27947519	27947944	unique_peak1	71	73	0.0191176	6.21901	0.306899
chr10	27947952	27948423	merged_common_peak	121	195	-0.542179	7.34362	2.68314
chr10	27982037	27982538	unique_peak2	31	63	-1.06921	5.46539	2.7145
chr10	27991831	27992337	merged_common_peak	108	164	-0.47411	7.12927	1.86144
chr10	28044881	28045142	unique_peak2	8	7	-0.0992912	2.95035	0.979903
chr10	28081447	28081659	unique_peak1	9	9	-0.252604	3.19563	1.03275
chr10	28142275	28142904	merged_common_peak	287	390	-0.163879	8.52909	0.795228
chr10	28168786	28169227	merged_common_peak	67	85	-0.289168	6.28168	0.616738
chr10	28174275	28174874	unique_peak1	44	43	0.0169627	5.46791	0.310901
chr10	28179503	28180198	merged_common_peak	195	158	0.51837	7.57207	3.07287
chr10	28367545	28368159	merged_common_peak	195	190	0.253824	7.70434	1.05221
chr10	28764474	28765073	unique_peak1	93	20	2.26296	5.5238	13.1657
chr10	28778621	28779120	unique_peak1	54	7	2.79754	4.39877	9.72168
chr10	29720572	29721252	merged_common_peak	148	172	-0.0421447	7.41356	0.311249
chr10	29852018	29852584	merged_common_peak	171	231	-0.235768	7.7401	0.888149
chr10	30046534	30047200	merged_common_peak	501	495	0.382175	9.14528	4.65311
chr10	30337688	30338785	merged_common_peak	122	109	0.304235	6.93348	0.948468
chr10	30472249	30472811	merged_common_peak	98	169	-0.671178	7.0738	3.35132
chr10	31106731	31107040	unique_peak2	13	33	-1.47966	4.34763	2.51395
chr10	31165551	31165951	unique_peak1	44	35	0.306469	5.32316	0.573175
chr10	31221491	31221859	merged_common_peak	53	54	-0.0131846	5.77477	0.30103
chr10	31245447	31246022	merged_common_peak	150	140	0.274271	7.27669	0.973138
chr10	31271139	31272089	merged_common_peak	215	175	0.527318	7.72309	3.47814
chr10	31305215	31305613	merged_common_peak	97	68	0.613441	6.41524	2.11771
chr10	31364208	31364652	unique_peak1	51	16	1.62031	4.89762	4.65856
chr10	33458692	33458891	unique_peak2	2	1	0.14253	1.07126	0.726999
chr10	33507255	33507767	unique_peak2	12	79	-2.83273	4.90557	12.8798
chr10	33509146	33509626	unique_peak2	36	103	-1.53731	5.93179	7.61427
chr10	33536627	33537161	merged_common_peak	109	161	-0.433022	7.12334	1.6047
chr10	33585512	33586299	merged_common_peak	75	192	-1.27736	6.95378	10.6195
chr10	33670154	33670427	unique_peak2	25	30	-0.355707	4.77634	0.446094
chr10	33707022	33707305	unique_peak2	19	23	-0.406351	4.38179	0.433767
chr10	33714067	33714502	merged_common_peak	74	79	-0.0280271	6.30791	0.302413
chr10	33718212	33718649	merged_common_peak	82	150	-0.782303	6.84725	3.84902
chr10	33856208	33856676	merged_common_peak	185	143	0.57752	7.45868	3.46697
chr10	34001680	34002311	merged_common_peak	110	145	-0.268514	7.05557	0.771884
chr10	34692444	34692807	unique_peak1	39	28	0.429918	5.07294	0.694972
chr10	36798315	36798620	merged_common_peak	18	48	-1.51819	4.85562	3.64582
chr10	36967520	36967917	merged_common_peak	59	157	-1.36699	6.62029	9.80342
chr10	36991466	36992280	merged_common_peak	507	493	0.407018	9.15188	5.28176
chr10	36994980	36996334	merged_common_peak	518	620	0.11122	9.33406	0.738634
chr10	37045287	37046146	merged_common_peak	361	596	-0.408464	9.01735	4.74067
chr10	37200037	37200655	merged_common_peak	300	450	-0.299182	8.66739	2.13519
chr10	37260499	37260829	unique_peak2	31	39	-0.39114	5.12636	0.499999
chr10	37798346	37798768	merged_common_peak	53	47	0.183213	5.67657	0.406463
chr10	38158833	38159527	merged_common_peak	119	94	0.476222	6.80797	1.69508
chr10	38704208	38704590	unique_peak2	24	41	-0.856595	4.96402	1.41531
chr10	38853476	38853974	merged_common_peak	66	55	0.306032	5.96037	0.644996
chr10	38882881	38883405	merged_common_peak	112	83	0.557572	6.6711	2.07615
chr10	38891492	38892240	merged_common_peak	240	200	0.510968	7.90654	3.62307
chr10	39099753	39100314	merged_common_peak	85	63	0.512925	6.25646	1.41268
chr10	39182678	39182914	unique_peak2	9	10	-0.390108	3.26438	1.07851
chr10	39334428	39334985	unique_peak2	62	79	-0.307056	6.1684	0.597059
chr10	39344383	39346280	merged_common_peak	244	333	-0.195341	8.28603	0.885489
chr10	39379276	39380218	merged_common_peak	90	125	-0.373914	6.79032	1.06994
chr10	39710785	39711441	merged_common_peak	98	92	0.199054	6.63869	0.546781
chr10	39726648	39727371	merged_common_peak	427	533	0.0204541	9.07092	0.317392
chr10	39761071	39761528	merged_common_peak	61	71	-0.180659	6.0796	0.379882
chr10	39771774	39772312	unique_peak1	82	32	1.41171	5.75025	6.20215
chr10	39783104	39783653	unique_peak1	88	65	0.523406	6.3061	1.52974
chr10	39788916	39789620	unique_peak1	112	98	0.320533	6.78962	0.963773
chr10	39838430	39839291	merged_common_peak	186	246	-0.192341	7.8522	0.724342
chr10	39844488	39845407	merged_common_peak	276	415	-0.315617	8.54263	2.2069
chr10	39881055	39882174	merged_common_peak	188	201	0.11484	7.71563	0.468595
chr10	39897099	39897916	merged_common_peak	240	365	-0.353681	8.33886	2.38791
chr10	39907206	39907638	unique_peak2	69	117	-0.699156	6.53307	2.53386
chr10	39909276	39909758	merged_common_peak	83	136	-0.622764	6.78665	2.44871
chr10	39932178	39932652	unique_peak2	32	50	-0.692392	5.32623	1.16605
chr10	39978121	39979134	merged_common_peak	138	120	0.362439	7.10008	1.32359
chr10	40021854	40022364	unique_peak1	57	40	0.524983	5.62004	1.09778
chr10	40047797	40048636	merged_common_peak	226	194	0.458912	7.83679	2.88596
chr10	40068357	40069702	merged_common_peak	149	152	0.145801	7.33029	0.496622
chr10	40091233	40091940	merged_common_peak	177	123	0.722891	7.31564	4.80012
chr10	40092799	40093300	merged_common_peak	118	99	0.388829	6.83827	1.27095
chr10	40219217	40220138	merged_common_peak	486	483	0.368959	9.10334	4.26369
chr10	40231968	40232491	merged_common_peak	98	93	0.183624	6.6464	0.514008
chr10	40236233	40236710	merged_common_peak	108	114	0.0467224	6.86885	0.324331
chr10	40317789	40318240	merged_common_peak	94	53	0.917321	6.21355	3.7231
chr10	40591077	40591529	merged_common_peak	66	99	-0.530469	6.37862	1.47058
chr10	40602562	40603369	unique_peak1	77	68	0.248144	6.2326	0.585182
chr10	41010800	41011244	merged_common_peak	138	122	0.338788	7.11191	1.20625
chr10	41061192	41061867	unique_peak2	50	58	-0.205942	5.77967	0.398714
chr10	41170664	41171337	merged_common_peak	109	161	-0.433022	7.12334	1.6047
chr10	41209086	41210413	merged_common_peak	143	142	0.177987	7.24886	0.586957
chr10	41238222	41239469	unique_peak2	116	115	0.147579	6.93177	0.452122
chr10	41272488	41274016	merged_common_peak	291	343	0.0429553	8.44774	0.338729
chr10	41278183	41278671	merged_common_peak	136	110	0.463693	7.02626	1.83454
chr10	41285057	41285388	unique_peak2	34	42	-0.352065	5.25023	0.48423
chr10	41294376	41294798	merged_common_peak	129	68	1.06565	6.64135	6.35099
chr10	41308200	41308917	merged_common_peak	109	93	0.352239	6.73071	1.04623
chr10	41310472	41311018	merged_common_peak	145	84	0.950542	6.88466	6.0063
chr10	41324387	41325691	merged_common_peak	189	230	-0.0702527	7.81662	0.349289
chr10	41331655	41332232	merged_common_peak	97	85	0.2957	6.57411	0.803416
chr10	41409674	41410121	merged_common_peak	104	98	0.203022	6.73087	0.563495
chr10	41428825	41429798	merged_common_peak	207	186	0.379457	7.73662	1.95045
chr10	41702460	41703075	merged_common_peak	151	157	0.120605	7.36408	0.449586
chr10	41711252	41711798	merged_common_peak	140	164	-0.062157	7.33524	0.325309
chr10	41750478	41751296	unique_peak1	94	53	0.917321	6.21355	3.7231
chr10	41812175	41812762	merged_common_peak	80	113	-0.415823	6.62498	1.16373
chr10	41923016	41923411	merged_common_peak	117	172	-0.415448	7.2269	1.57352
chr10	41949975	41951279	merged_common_peak	343	370	0.196225	8.63339	1.12794
chr10	41967975	41968297	unique_peak2	59	62	-0.0404897	5.95704	0.302795
chr10	41970811	41971526	merged_common_peak	266	341	-0.0918732	8.37192	0.432257
chr10	41979383	41980008	merged_common_peak	100	171	-0.656044	7.09824	3.307
chr10	41987927	41988429	unique_peak2	104	96	0.232466	6.71615	0.636469
chr10	41993023	41994542	merged_common_peak	527	488	0.483493	9.17544	7.45227
chr10	41997112	41998513	unique_peak2	278	297	0.177168	8.30775	0.8494
chr10	42197683	42198514	unique_peak2	71	85	-0.197694	6.32742	0.436836
chr10	42434431	42434982	merged_common_peak	103	125	-0.160216	6.89717	0.432469
chr10	42443140	42444291	merged_common_peak	172	171	0.205226	7.52888	0.730412
chr10	42473638	42474597	merged_common_peak	214	193	0.379411	7.78962	2.00467
chr10	42488176	42488804	merged_common_peak	149	108	0.635004	7.08569	3.24206
chr10	42491808	42492175	unique_peak2	44	48	-0.138315	5.54555	0.322048
chr10	42940888	42941567	merged_common_peak	88	93	0.0132115	6.56119	0.30565
chr10	43030527	43031358	merged_common_peak	184	148	0.519649	7.47899	2.92867
chr10	43077693	43078155	merged_common_peak	74	74	0.0650823	6.26136	0.32389
chr10	43083369	43083733	unique_peak1	47	34	0.450396	5.35448	0.822616
chr10	43104265	43104835	merged_common_peak	87	133	-0.516372	6.8079	1.76326
chr10	43159537	43159742	unique_peak2	2	3	-0.85747	1.57126	0.80618
chr10	43228959	43229530	merged_common_peak	177	311	-0.608314	7.98124	5.06328
chr10	43232683	43233230	merged_common_peak	139	107	0.537887	7.02383	2.36982
chr10	43421236	43421829	merged_common_peak	143	149	0.10904	7.28334	0.419064
chr10	43448470	43448818	merged_common_peak	49	45	0.121448	5.58429	0.3582
chr10	43550489	43550855	unique_peak2	39	38	0.00249647	5.28665	0.30385
chr10	43648281	43648779	unique_peak2	59	51	0.23635	5.81861	0.49517
chr10	43725888	43726502	merged_common_peak	208	291	-0.255797	8.06193	1.15933
chr10	43988985	43989499	unique_peak2	63	71	-0.12985	6.105	0.340664
chr10	44015520	44016081	merged_common_peak	125	289	-1.05575	7.65203	11.7761
chr10	44143096	44143579	merged_common_peak	70	75	-0.0417396	6.22706	0.302487
chr10	44167141	44167791	merged_common_peak	107	100	0.219251	6.76784	0.62413
chr10	44174602	44175035	merged_common_peak	66	100	-0.544824	6.3858	1.54283
chr10	44310680	44310773	unique_peak2	1	1	-0.506362	0.746819	0.60206
chr10	44327032	44327603	unique_peak2	46	72	-0.643838	5.86791	1.45005
chr10	44419805	44420562	unique_peak2	89	128	-0.425546	6.79845	1.29711
chr10	44474582	44475188	merged_common_peak	107	147	-0.331991	7.04346	0.991547
chr10	44482890	44483298	unique_peak2	45	129	-1.5108	6.26697	9.20255
chr10	44484940	44485729	merged_common_peak	387	636	-0.391024	9.11964	4.66865
chr10	44768328	44769050	merged_common_peak	132	156	-0.083934	7.25265	0.34675
chr10	44789897	44790358	merged_common_peak	177	167	0.28477	7.5347	1.14541
chr10	44930095	44930702	merged_common_peak	190	173	0.346954	7.61642	1.57401
chr10	45092391	45092603	unique_peak2	6	3	0.498514	2.24926	1.08602
chr10	45325667	45326037	merged_common_peak	46	43	0.0865547	5.50271	0.339647
chr10	45568784	45569236	merged_common_peak	145	76	1.09315	6.81336	7.47376
chr10	45572518	45572808	unique_peak2	32	27	0.172679	4.89369	0.393152
chr10	46909416	46909866	unique_peak1	83	4	4.15334	4.3986	21.1319
chr10	47371857	47372502	merged_common_peak	254	76	1.9856	7.25959	32.3143
chr10	48769143	48769500	unique_peak1	60	12	2.2628	4.83184	8.33256
chr10	50343456	50343776	merged_common_peak	41	62	-0.611299	5.67163	1.23731
chr10	50522261	50522521	unique_peak2	9	13	-0.738031	3.43834	0.562038
chr10	51351310	51351676	unique_peak1	49	31	0.645009	5.3225	1.27789
chr10	51441683	51442048	unique_peak2	37	43	-0.253621	5.33262	0.398838
chr10	51451219	51451663	merged_common_peak	61	74	-0.239553	6.10904	0.458521
chr10	51483070	51483371	unique_peak2	29	43	-0.631929	5.14347	0.994385
chr10	51488173	51488629	merged_common_peak	106	148	-0.356593	7.04087	1.14537
chr10	51763731	51764224	merged_common_peak	106	99	0.218719	6.75322	0.593221
chr10	51997847	51998119	unique_peak2	12	28	-1.36878	4.17359	1.96542
chr10	52080609	52081361	merged_common_peak	442	543	0.0488142	9.11187	0.379569
chr10	52590866	52591397	merged_common_peak	254	188	0.690144	7.90731	6.38841
chr10	52834872	52835300	merged_common_peak	81	99	-0.207153	6.54028	0.469261
chr10	53068013	53068477	merged_common_peak	132	143	0.0407618	7.19031	0.319686
chr10	53070650	53071113	merged_common_peak	96	110	-0.0888648	6.74998	0.337564
chr10	53083924	53084468	unique_peak1	77	61	0.402472	6.15543	0.973122
chr10	53102069	53103327	merged_common_peak	578	592	0.352858	9.38832	4.69441
chr10	53114516	53115385	merged_common_peak	216	193	0.394229	7.79703	2.17022
chr10	53116891	53117311	merged_common_peak	137	130	0.236324	7.15159	0.741967
chr10	53127172	53127655	merged_common_peak	463	592	-0.00149074	9.21114	0.30103
chr10	53142669	53143327	merged_common_peak	125	107	0.369272	6.93952	1.26128
chr10	53181086	53181655	merged_common_peak	85	98	-0.116431	6.57114	0.35734
chr10	53649357	53650317	merged_common_peak	346	304	0.492731	8.49903	4.95255
chr10	53655803	53656363	merged_common_peak	598	849	-0.112225	9.67521	0.82829
chr10	53709971	53710384	merged_common_peak	76	59	0.429128	6.12145	1.05486
chr10	53737888	53738227	merged_common_peak	50	70	-0.473046	5.91322	0.951571
chr10	53762054	53762670	merged_common_peak	103	90	0.30927	6.66243	0.868113
chr10	53790127	53790747	unique_peak2	122	181	-0.4222	7.29669	1.69287
chr10	53792396	53794510	merged_common_peak	592	615	0.336196	9.43488	4.45223
chr10	53870519	53870881	unique_peak2	32	44	-0.511819	5.23594	0.714194
chr10	54913477	54913942	unique_peak1	63	28	1.18209	5.44903	3.73416
chr10	55032712	55033097	unique_peak1	42	17	1.23371	4.78678	2.67563
chr10	55923763	55924129	merged_common_peak	58	113	-0.922997	6.37139	3.88418
chr10	56179289	56179669	merged_common_peak	39	29	0.381008	5.09739	0.621525
chr10	56598623	56599032	merged_common_peak	57	109	-0.898824	6.33195	3.58187
chr10	57219157	57219887	merged_common_peak	127	126	0.160678	7.06902	0.508578
chr10	57251980	57252537	merged_common_peak	265	326	-0.0331727	8.33656	0.313131
chr10	57378985	57379395	merged_common_peak	106	165	-0.512464	7.11881	2.16596
chr10	57380214	57380769	merged_common_peak	80	104	-0.297179	6.56566	0.716494
chr10	57514219	57515192	unique_peak1	94	87	0.212777	6.56582	0.559811
chr10	57686366	57689015	merged_common_peak	420	297	0.835591	8.63696	14.9668
chr10	57867936	57869130	merged_common_peak	167	166	0.200851	7.48413	0.711423
chr10	58703855	58704328	merged_common_peak	88	91	0.0442384	6.54568	0.319711
chr10	58740374	58740830	merged_common_peak	129	171	-0.25209	7.30022	0.804188
chr10	58745047	58745559	merged_common_peak	269	473	-0.544883	8.6163	6.29607
chr10	58867434	58867790	merged_common_peak	40	46	-0.227173	5.441	0.392003
chr10	58905951	58906420	merged_common_peak	189	174	0.330285	7.61635	1.4699
chr10	58928267	58928867	merged_common_peak	144	120	0.43007	7.1339	1.72529
[truncated: 20,279 more rows]
